# Supplementary material
Source: publisher figshare collection journal article supplement (https://acs.figshare.com/ndownloader/files/5227993)

## Synthesis of the Privileged 8-Arylmenthol Class by Radical Arylation of Isopulegol

Steven W. M. Crossley<sup>+</sup>, Ruben M. Martinez<sup>+</sup>, Sebastian Guevara-Zuluaga, Ryan A. Shenvi\*

[+] These authors contributed equally to this work.

Department of Chemistry, The Scripps Research Institute

10550 North Torrey Pines Road, La Jolla, CA 92037

### Table of Contents

|                                                                               |     |
|-------------------------------------------------------------------------------|-----|
| 1. Materials and Methods.....                                                 | S3  |
| 2. General Procedures .....                                                   | S3  |
| 2.1 General procedure for the synthesis of aryl sulfonate esters .....        | S3  |
| 2.2 General procedure for the intramolecular hydroarylation .....             | S4  |
| 2.3 Comments regarding the title HAT Hydroarylation method .....              | S6  |
| 3. Experimental Procedures and Characterization Data .....                    | S8  |
| 3.01 (–)- <b>1</b> : (–)-8-phenylmenthol .....                                | S8  |
| 3.02 (+)- <b>2</b> : (+)-isopulegol .....                                     | S9  |
| 3.03 <b>3</b> : sulfonate precursor to (–)-8-Phenylmenthol .....              | S9  |
| 3.04 <i>ent</i> - <b>3</b> : sulfonate precursor to (+)-8-phenylmenthol ..... | S10 |
| 3.05 (+)- <b>1</b> : (+)-8-phenylmenthol .....                                | S10 |
| 3.06 <b>SI-01</b> : sulfonate precursor to <b>4a</b> .....                    | S12 |
| 3.07 <b>4a</b> : 8-( <i>o</i> -anisole)menthol .....                          | S12 |
| 3.08 <b>SI-02</b> : sulfonate precursor to <b>4b</b> .....                    | S14 |
| 3.09 <b>4b</b> : 8-( <i>p</i> -anisole)menthol .....                          | S14 |
| 3.10 <b>SI-03</b> : Sulfonate precursor to <b>5a</b> .....                    | S15 |
| 3.11 <b>5a</b> : 8-( <i>o</i> -tolyl)menthol .....                            | S16 |
| 3.12 <b>SI-04</b> : sulfonate precursor to <b>5b</b> .....                    | S17 |
| 3.13 <b>5b</b> : 8-( <i>m</i> -tolyl)menthol .....                            | S18 |
| 3.14 <b>SI-05</b> : sulfonate precursor to <b>5c</b> .....                    | S19 |
| 3.15 <b>5c</b> : 8-( <i>p</i> -tolyl)menthol.....                             | S20 |
| 3.16 <b>SI-06</b> : sulfonate precursor to <b>6a</b> .....                    | S21 |
| 3.17 <b>6a</b> : 8-[3,5-bis(trifluoromethyl)phenyl]menthol .....              | S22 |
| 3.18 <b>SI-07</b> : sulfonate precursor to <b>6b</b> .....                    | S23 |
| 3.19 <b>6b</b> : 8-(2-chlorophenyl)menthol .....                              | S24 |
| 3.20 <b>SI-08</b> : sulfonate precursor to <b>6c</b> .....                    | S25 |
| 3.21 <b>6c</b> : 8-(2,5-difluorophenyl)menthol .....                          | S26 |
| 3.22 <b>SI-09</b> : sulfonate precursor to <b>7</b> .....                     | S27 |
| 3.23 <b>7</b> : 8-(2-naphthyl)menthol.....                                    | S28 |

|      |                                                                                                                |     |
|------|----------------------------------------------------------------------------------------------------------------|-----|
| 3.24 | <b>SI-10:</b> sulfonate precursor to <b>8</b> .....                                                            | S29 |
| 3.25 | <b>8:</b> 8-(1-naphthyl)menthol .....                                                                          | S29 |
| 3.26 | <b>SI-11:</b> sulfonate precursor to <b>9</b> .....                                                            | S31 |
| 3.27 | <b>9:</b> 8-(1-pyrenyl)menthol .....                                                                           | S32 |
| 3.28 | <b>SI-12:</b> sulfonate precursor to <b>10</b> .....                                                           | S32 |
| 3.29 | <b>10:</b> 8-(2-pyridyl)menthol .....                                                                          | S33 |
| 3.30 | <b>SI-13:</b> sulfonate precursor to <b>11</b> .....                                                           | S34 |
| 3.31 | <b>11:</b> 8-(3-pyridyl)menthol .....                                                                          | S35 |
| 3.32 | <b>SI-14:</b> sulfonate precursor to <b>12</b> .....                                                           | S37 |
| 3.33 | <b>12:</b> 8-(6-phenoxy-pyrid-3-yl)menthol .....                                                               | S37 |
| 3.34 | <b>SI-15:</b> sulfonate precursor to <b>13</b> .....                                                           | S38 |
| 3.35 | <b>13:</b> 8-(8-quinolyl)menthol .....                                                                         | S39 |
| 3.36 | <b>SI-16:</b> sulfonate precursor to <b>14</b> .....                                                           | S40 |
| 3.37 | <b>14:</b> 8-(methyl 2-furan-5-carboxylate)menthol .....                                                       | S40 |
| 3.38 | <b>SI-17:</b> sulfonate precursor to <b>15</b> .....                                                           | S42 |
| 3.39 | <b>15:</b> 8-(5-bromothiophen-2-yl)menthol .....                                                               | S42 |
| 3.40 | <b>SI-18:</b> sulfonate precursor to <b>16</b> .....                                                           | S43 |
| 3.41 | <b>16:</b> 8-(2-thiazolyl)menthol .....                                                                        | S44 |
| 3.42 | <b>SI-19:</b> sulfonate precursor to <b>17</b> .....                                                           | S45 |
| 3.43 | <b>17:</b> 8-(2-benzothiazolyl)menthol .....                                                                   | S46 |
| 3.44 | <b>SI-20:</b> sulfonate precursor to <b>18</b> .....                                                           | S47 |
| 3.45 | <b>18:</b> 8-(4-benzofurazanyl)menthol .....                                                                   | S48 |
| 3.46 | <b>SI-21:</b> diamine product of benzofurazano double-NO bond reduction .....                                  | S49 |
| 3.47 | <b>SI-22:</b> 2-methylhex-5-en-3-ol .....                                                                      | S50 |
| 3.48 | <b>20a:</b> 2-methylhex-5-en-3-yl benzenesulfonate .....                                                       | S50 |
| 3.49 | <b>20b:</b> 2-methyl-5-phenylhexan-3-ol .....                                                                  | S51 |
| 3.50 | <b>21a:</b> 2-vinylcyclohexyl benzenesulfonate .....                                                           | S52 |
| 3.51 | <b>21b:</b> (1 <i>R</i> ,2 <i>S</i> )-2-(( <i>S</i> )-1-phenylethyl)cyclohexan-1-ol .....                      | S53 |
| 3.52 | <b>SI-23:</b> (±)-(1 <i>R</i> ,2 <i>S</i> )-2-(( <i>S</i> )-1-phenylethyl)cyclohexyl 3,5-dinitrobenzoate ..... | S55 |
| 4.   | NMR Spectra. ....                                                                                              | S55 |

## 1. Materials and Methods

All reactions were carried out under positive pressure of argon unless otherwise noted. Phenylsilane was purchased from Oakwood Chemicals or Acros and used without further purification. Pentane, hexanes, dichloromethane (DCM), toluene, ethyl acetate (EtOAc), and diethyl ether were purchased from Fisher Chemicals and used without further purification. Benzene, dimethylsulfoxide (DMSO), methanol (MeOH), *N*-dimethylformamide (DMF), dichloroethane (DCE),  $\alpha, \alpha, \alpha$ -trifluorotoluene and triethylamine were purchased from Sigma Aldrich, EMD Chemicals, Fisher Chemicals or Acros Organics and used without further purification. All anhydrous solvents were purchased from Fisher Chemicals, Sigma Aldrich or Acros Organics and used without further purification, unless otherwise stated. Reactions were monitored by thin layer chromatography (TLC) with precoated silica gel plates from EMD Chemicals (TLC Silica gel 60 F254, 250  $\mu\text{m}$  thickness) using UV light as the visualizing agent and an acidic mixture of anisaldehyde, phosphomolybdic acid (PMA), chromic acid, iodine vapor, Seebach's stain, or basic aqueous potassium permanganate ( $\text{KMnO}_4$ ), and heat as developing agents. Preparatory thin layer chromatography (PTLC) was performed using the aforementioned silica gel plates. Flash column chromatography was performed over silica gel 60 (particle size 0.035- 0.07 mm) from Acros Organics. NMR spectra were recorded on Bruker DRX-600 (equipped with a 5mm DCH Cryoprobe), AV-600, DRX-500 or DPX-400 and calibrated using residual non-deuterated solvent as an internal reference ( $\text{CHCl}_3$  @ 7.26 ppm  $^1\text{H}$  NMR, 77.16 ppm  $^{13}\text{C}$  NMR;  $\text{C}_6\text{D}_6$  @ 7.16  $^1\text{H}$  NMR, 128.06  $^{13}\text{C}$  NMR). The following abbreviations (or combinations thereof) were used to explain the multiplicities: s = singlet, d = doublet, t = triplet, q = quartet, p = pentet, sex = sextet, sep = septet m = multiplet, br = broad. LC/MS analysis was performed on an Agilent 1200 series HPLC/MS equipped with an Agilent SB-C18 2.1 mm x 50 mm column, with mass spectra recorded on a 6120 Quadrupole mass spectrometer (API-ES), using ACN and  $\text{H}_2\text{O}$  as the mobile phase (0.1% formic acid). LC/MS runs used the following method unless otherwise specified: flow rate of 0.5 mL / min is used, initial equilibration of 5% ACN /  $\text{H}_2\text{O}$  with a linear gradient to 95% ACN /  $\text{H}_2\text{O}$  over 5 minutes, then a hold at 95% ACN /  $\text{H}_2\text{O}$  for an additional 3 minutes. GC/MS analysis was performed on Agilent 7820A/5975 GC/MSD system with helium as a carrier gas. Unless otherwise specified, GC/MS runs were performed with the following method: GC/MSD; HP-5MS (30m x 0.25mm ID, part # 19091S-433); 139 KPa; flow rate 2 mL/min; inlet temperature 250  $^\circ\text{C}$ ; column temperature 50  $^\circ\text{C}$  for 0 min, then 20  $^\circ\text{C}/\text{min}$  to 280  $^\circ\text{C}$ , then held for 2 min. GC/FID analysis was conducted on an Agilent 7820A GC/FID system with nitrogen as a carrier gas and with air and hydrogen as combustion gasses. Unless otherwise specified, GC/FID runs were prepared with the following method: GC/FID; HP-5MS UI (20m x 0.180mm ID, part # 190915-577UI); inlet temperature 250  $^\circ\text{C}$ ; column temperature 50  $^\circ\text{C}$  for 0 min, then 20  $^\circ\text{C}/\text{min}$  to 280  $^\circ\text{C}$ , then held for 2 min. Chiral HPLC analysis was performed on Agilent 1100 series equipped with a DAD detector. Chiralcel OZ-3, 3  $\mu\text{m}$  particle size, 250 mm x 6 mm column; flow rate 1 mL/min with solvent mixture of 98% hexanes and 2% isopropanol; detection wavelength 210 nm. Optical rotations of arylated menthol derivatives were measured digitally on an Autopol III polarimeter from Rudolph Research Analytic, using a flow cell with a 0.5 decimeter pathlength and the sodium lamp D-line wavelength ( $\lambda=589.3$  nm).

## 2. General Procedures

### 2.1 General procedure for the synthesis of aryl sulfonate esters

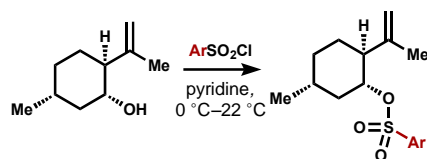

**General Procedure 2.1A** - For cases where the aryl sulfonyl chloride reagent was a liquid:

A flame-dried round bottom flask was charged with a stir bar, the alcohol reagent (1.0 eq.) and anhydrous pyridine [0.8 M] under an Argon atmosphere. The solution was cooled to 0 °C in an ice bath. The aryl sulfonyl chloride (1.2 eq.) was then added slowly with stirring and the reaction was allowed to warm to ambient temperature. The reaction was stirred until completion, as monitored by TLC through the disappearance of the starting alcohol, or for 24 hours, whichever occurred first.

**General Procedure 2.1B** - For cases where the aryl sulfonyl chloride reagent was a solid:

The above procedure was used, but the sulfonyl chloride was added in one portion. Following this addition, the reaction was placed under positive pressure of argon for 5-10 minutes with a balloon of argon gas to flush most of the air out.

In cases of sluggish reactions (i.e. with highly electron-rich or sterically encumbered aryl moieties), 4-dimethylaminopyridine (DMAP) may optionally be added in catalytic quantities (~10-20 mol%) to accelerate reaction. In these cases, washing of the crude reaction mixture with portions of HCl followed by half-saturated sodium bicarbonate may be effective in removing residual DMAP and/or sulfonate byproducts.

**Work-up:** In cases where the aryl group was a carboaromatic group, addition of a small amount of cold water (0 – 4 °C) usually resulted in the precipitation of the desired product as a white or pink/white crystalline solid. In these cases, the precipitate was filtered off and rinsed with excess cold water and dried in a vial under high vacuum (<1 torr) to remove water. The desired products were used without further purification in the title HAT hydroarylation reaction.

In cases where the aryl group was a heteroaromatic group, a precipitate typically does not form upon addition of cold water; so two different work-up procedures were followed. In the first case, the reaction was concentrated directly (without addition of water) *in vacuo* and loaded onto a silica column for purification by flash column chromatography with an appropriate eluent system (typically mixtures of Et<sub>2</sub>O/hexanes, EtOAc/hexanes, or toluene). Alternatively, the reaction may be quenched by the addition of cold water, extracted with methylene chloride or Et<sub>2</sub>O (3x), washed with brine and dried over MgSO<sub>4</sub>. The drying agent was then filtered off and the organic solvent was removed *in vacuo* to obtain a residue suitable for purification by flash column chromatography in an appropriate solvent system.

## 2.2 General procedure for the intramolecular hydroarylation

**General Procedure 2.2A** - Small Scale (Generally used for < 50 mg. of substrate. Pros: involves fewer reagents, is simpler to set up, and is completed more quickly. Cons: The reaction uses 1 eq. of Mn(dpm)<sub>3</sub>.)

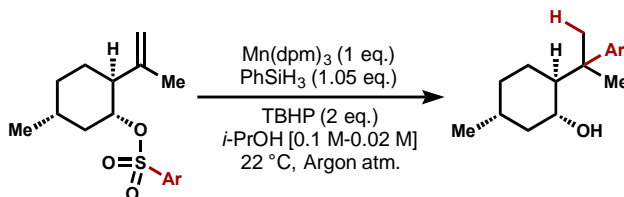



A flame-dried round bottom flask (of ~2x the volume of solvent to be used for the reaction) was charged with a stir bar, substrate (1.0 eq.) and  $\text{Mn(dpm)}_3$  (1.0 eq.). The reaction vessel was evacuated on a vacuum gas manifold and refilled with nitrogen gas successively three times. The flask was removed from the manifold and swiftly placed under positive pressure of argon. (Argon was allowed to flow over the surface of the reaction using a 22 gauge needles for the inlet and outlet needles). Degassed *i*-PrOH (0.1M – 0.02 M; 0.025 M is recommended for difficult substrates, but 0.1 M is usually fine for most substrates) was then added via a syringe. The reaction was stirred and TBHP (2.0 eq. as a solution in *n*-decane or hexanes) was added (TBHP addition is optional – TBHP accelerates the reaction). Finally,  $\text{PhSiH}_3$  (1.05 eq.) was added in one portion to the reaction. The outlet needle for the Argon was removed after  $\text{PhSiH}_3$  addition. The reaction was monitored by TLC and stirred at ambient temperature. After the starting material was consumed, after the reaction turned pale yellow,<sup>1</sup> or after 24hrs, the reaction was worked-up. *Work-up*: The reaction was concentrated directly *in vacuo* and purified by FCC on silica gel using an appropriate solvent system. (Typically mixtures of  $\text{Et}_2\text{O}$ /hex,  $\text{EtOAc}$ /hex, or pure toluene.) Alternatively, the reaction may be quenched with water, extracted with an appropriate solvent ( $\text{CH}_2\text{Cl}_2$ ,  $\text{Et}_2\text{O}$ ,  $\text{EtOAc}$  and hexanes are all fine); the organics washed with  $\text{NaHCO}_3$  (a saturated aqueous solution), brine (saturated aqueous solution), dried over  $\text{Na}_2\text{SO}_4$  or  $\text{MgSO}_4$ , filtered, concentrated *in vacuo* and purified by FCC over silica gel with an appropriate solvent system.

**General Procedure 2.2B** - Large Scale (Generally used for > 50 mg. of substrate. Pros: The reaction is cleaner and uses a cheaper Mn(III) source. Cons: The reaction may be slow, taking ~1 week to complete at 5 mol%  $\text{Mn(dpm)}_3$  loading. The reaction is faster at higher  $\text{Mn(dpm)}_3$  loading.)

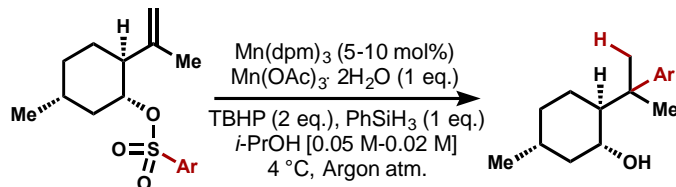

A flame-dried round bottom flask was charged with a stir bar, substrate (1.0 eq.),  $\text{Mn(OAc)}_3 \cdot 2\text{H}_2\text{O}$  (1.0 eq.) and  $\text{Mn(dpm)}_3$  (5-10 mol%). The reaction vessel was evacuated SLOWLY [to minimize  $\text{Mn(OAc)}_3 \cdot 2\text{H}_2\text{O}$  powder from being pulled up into the manifold] and refilled with nitrogen gas successively three times. The reaction was removed from the manifold and swiftly placed under positive pressure of argon. Degassed *i*-PrOH (0.025 M) was then added via a syringe or cannula. Next, TBHP (2.0 eq., as a solution in hexanes or *n*-decane) was added. The reaction was cooled to 4 °C in a cold room while stirring. After ~20 minutes,  $\text{PhSiH}_3$  (1.0 eq.) was added slowly. The reaction was stirred until complete. *Work-up*: The reaction was concentrated *in vacuo* to remove *i*-PrOH. The remaining oily solid was suspended in hexanes and filtered over a medium glass frit to remove most of the [Mn] salts. The filtrate was then concentrated *in vacuo* and purified by FCC on silica using an appropriate solvent system.

**Note:** *i*-PrOH was degassed by bubbling argon gas through the solution for >30 minutes while sonicating, longer for larger volumes of solvent. Non-anhydrous *i*-PrOH was used in most cases. No noticeable differences were observed between use of anhydrous and non-anhydrous *i*-PrOH. TBHP solutions were prepared according to by extraction of a commercial 70% aq. w/w solution with hexanes according to this procedure and

[1] The color of the reaction is initially black and gradually becomes clearer as  $\text{Mn}^{3+}$  (black) is reduced to  $\text{Mn}^{2+}$  (yellow). Complete disappearance of the black color indicates complete consumption of  $\text{Mn}^{3+}$ .

stored at -30 °C over 4Å molecular sieves.<sup>2</sup> Mn(dpm)<sub>3</sub> was prepared from MnSO<sub>4</sub> following a previously reported procedure.<sup>3</sup>

### 2.3 Comments regarding the title HAT Hydroarylation method

The title reaction was optimized around the conversion of sulfonate **3** to (–)-**1**, shown here:

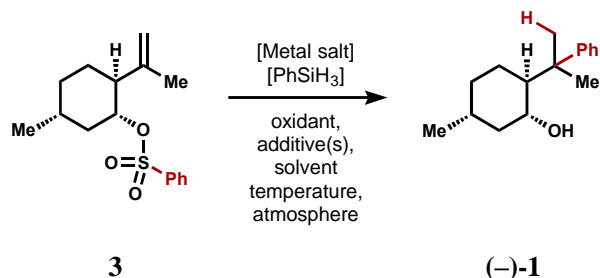

Analysis of variations in reaction conditions was conducted using thin layer chromatography (primarily) and NMR (secondarily). The reaction conditions were modified in order to maximize consumption of starting material (**3**) and formation of the desired product (–)-**1**, and to minimize side products. TLC analysis provided qualitative information that guided our optimization efforts. *The following comments are intended to provide further insight into this reaction based on conclusions drawn from TLC data.*

#### Regarding reaction byproducts:

In addition to the desired compound (–)-**1**, a number of other side products were identified. These include:

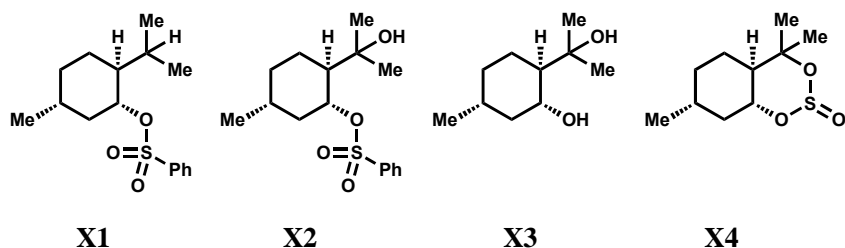

The reduced compound **X1** was generally the major byproduct in this reaction. Hydrate **X2** and diol **X3** appeared if oxygen (O<sub>2</sub>) was permitted to enter the reaction vessel, and sulfite ester **X4** was observed in certain cases when Mn(OAc)<sub>3</sub>•2H<sub>2</sub>O was present. The appearance of **X2** and **X3** when oxygen was present led us to exclude oxygen from the system, and so the reactions were conducted under an Argon atmosphere.

#### Regarding selection of the metal complex:

[2] Iwasaki, K.; Wan, K.; Oppedisano, A.; Crossley, S.W.M.; Shenvi, R.A. *J. Am. Chem. Soc.*, **2014**, *136* (4), pp 1300–1303. See SI-pg. 4.

[3] Ibid. See SI-pg. 2-3.

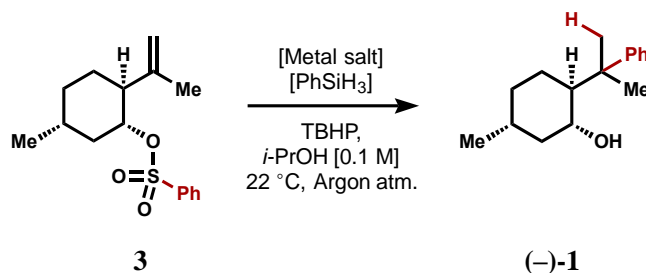

Exploration of metal complexes for the title reaction focused on Mn, Fe, and Co complexes bearing 1,3-diketonate ligands, which to generate carbon-centered radicals in the presence of *i*-PrOH and PhSiH<sub>3</sub>.<sup>4</sup> In particular, we considered Mn(acac)<sub>3</sub>, Mn(dibm)<sub>3</sub>, Mn(dpm)<sub>3</sub>, Fe(acac)<sub>3</sub>, Fe(dibm)<sub>3</sub>, Fe(dpm)<sub>3</sub>, Co(acac)<sub>3</sub>, Co(acac)<sub>2</sub> and Co(dpm)<sub>3</sub> (acac = acetylacetonato; dibm = diisobutyrylmethanato; dpm = dipivaloylmethanato). Mn<sup>3+</sup> and Fe<sup>3+</sup> complexes were all able to effect the desired transformation but Co<sup>3+</sup> complexes were completely inactive under the reaction conditions and only starting material **3** was observed. Co(acac)<sub>2</sub> could only effect the desired transformation when oxygen was present, which also led to significant formation of Mukaiyama hydration side products **X1** and **X2**. The behavior of Mn<sup>3+</sup> salts and Fe<sup>3+</sup> salts for the conversion of **3** to (-)-**1** was qualitatively similar, but Mn<sup>3+</sup> complexes effected the transformation more quickly at room temperature, gave better yields, and were much easier to remove from reactions since they could be removed by filtration over a silica pad, while Fe salts required a work-up involving an aqueous solution of KHF<sub>2</sub>. Between ligands, dibm and dpm behaved similarly and were superior to acac. Specifically, 2 eq. of Mn(acac)<sub>3</sub> were required to consume starting material **3** while only 1 eq. of Mn(dibm)<sub>3</sub> and Mn(dpm)<sub>3</sub> were required. Mn(dpm)<sub>3</sub> was preferred over Mn(dibm)<sub>3</sub> because the Hdpm ligand is commercially available, as is Mn(dpm)<sub>3</sub> itself.

#### Regarding reaction concentration:

##### Effect of concentration

| entry | Mn(dpm) <sub>3</sub> | Mn(OAc) <sub>3</sub> | PhSiH <sub>3</sub> | TBHP     | Temp. | [ <i>i</i> -PrOH] | <b>3</b> | <b>X1</b> | (-)- <b>1</b> |
|-------|----------------------|----------------------|--------------------|----------|-------|-------------------|----------|-----------|---------------|
| 1     | 0.05 equiv.          | 1 equiv.             | 1.05 equiv.        | 2 equiv. | 4 °C  | <b>0.02 M</b>     | 0        | 1         | 20            |
| 2     | 0.05 equiv.          | 1 equiv.             | 1.05 equiv.        | 2 equiv. | 4 °C  | <b>0.025 M</b>    | 0        | 1         | 15            |
| 3     | 0.05 equiv.          | 1 equiv.             | 1.05 equiv.        | 2 equiv. | 4 °C  | <b>0.05 M</b>     | 0        | 1         | 7             |
| 4     | 0.05 equiv.          | 1 equiv.             | 1.05 equiv.        | 2 equiv. | 4 °C  | <b>0.1 M</b>      | 0        | 1         | 3             |

Entries are based on NMR spectra of crude reaction mixtures.

Higher dilution results in a cleaner reaction (less hydrogenation side product in particular) but also in longer reaction times. At concentrations less than [0.02 M], the reaction stalls. At concentrations above [0.1 M], hydrogenation dominates and conversion is lower because hydrogenation consumes twice as much PhSiH<sub>3</sub> and Mn(dpm)<sub>3</sub>. Longer reaction times are significant only when stoichiometric Mn(OAc)<sub>3</sub>•2H<sub>2</sub>O (alongside catalytic Mn(dpm)<sub>3</sub>) is used. Higher dilution has minimal effects on lengthening reaction times when stoichiometric Mn(dpm)<sub>3</sub> is used.

#### Regarding temperature:

[4] See citations by Mukaiyama, Boger, Baran, Shenvi, Herzon and Norton in main paper.

At 4 °C, the reactions are slower than at 22 °C but appear moderately cleaner by TLC analysis and results in better consumption of starting material. Conversion is better at 4 °C than at 22 °C when Mn(OAc)<sub>3</sub>•2H<sub>2</sub>O is used. Consumption of the sulfonyl ester starting material **3** is markedly worse at elevated temperatures.

#### Regarding PhSiH<sub>3</sub> loading:

Based on TLC analysis, increasing PhSiH<sub>3</sub> loading increased the formation of hydrogenated byproducts **X2** and **X3**. At a loading of less than 1 eq. however, substrate was not fully consumed.

#### Regarding TBHP loading:

Two equivalents of TBHP seemed to have the optimal effect on rate acceleration based on TLC analysis. Although beneficial, TBHP is not necessary for the reaction to work.

### 3. Experimental Procedures and Characterization Data

#### 3.01 (–)-**1**: (–)-8-phenylmenthol

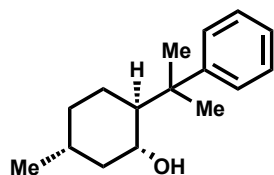

Large scale: Compound (–)-**1** was obtained following procedure 2.2B of the intramolecular HAT hydroarylation method. Specifically, 15 g. of compound **3** (1.0 eq., 50.9 mmol), Mn(dpm)<sub>3</sub> (0.05 eq., 1.54 g.), Mn(OAc)<sub>3</sub>•2H<sub>2</sub>O (1.0 eq., 13.7 g.), PhSiH<sub>3</sub> (1.05 eq., 6.59 mL); TBHP (2.0 eq., 10.2 mL of a 10.0 M solution in hexanes), and *i*-PrOH ([0.025 M], 2.036 L) were used. However, the reaction still showed indication of starting material after one week and so was allowed to stir for one more week, but no noticeable change was observed by TLC during that time period. Consequently, the reaction was worked-up as per the standard procedure and the resultant ~21 g. of crude material purified in three batches over silica gel using a solvent gradient of 10% Et<sub>2</sub>O/hex to 15% Et<sub>2</sub>O/hex to obtain 9.2 g. (39.6 mmol, 78% yield) of 8-phenyl menthol (–)-**1** as a viscous clear pale yellow oil. Approximately 500 mg. of starting material was recovered.

#### Characterization data of 8-phenylmenthol (–)-**1**:

*R<sub>f</sub>* 0.45 (25% Et<sub>2</sub>O in hexanes, stains purple in anisaldehyde)

Opt. Rot. -24.8° (c = 2.04 in EtOH, 22 °C)

<sup>1</sup>H NMR (600 MHz, CDCl<sub>3</sub>)

δ 7.43 – 7.38 (m, 2H), 7.35 – 7.30 (m, 2H), 7.21 – 7.17 (m, 1H), 3.54 (ddd, *J* = 10.8, 9.5, 4.3 Hz, 1H), 1.85 (dtd, *J* = 12.4, 4.0, 2.4 Hz, 1H), 1.77 – 1.68 (m, 2H), 1.68 – 1.60 (m, 1H), 1.43 (s, 3H), 1.43 – 1.35 (m, 1H), 1.30 (s, 3H), 1.11 – 0.91 (m, 3H), 0.89 (d, *J* = 6.6 Hz, 3H), 0.91 – 0.82 (m, 1H)

<sup>13</sup>C NMR (151 MHz, CDCl<sub>3</sub>)

<sup>13</sup>C NMR (151 MHz, CDCl<sub>3</sub>) δ 151.4, 128.6, 125.9, 125.9, 73.1, 54.3, 45.5, 39.9, 35.0, 31.6, 28.9, 26.6, 24.4, 22.1

GC-MS (EI) Retention time: 8.42 min.

| m/z | % Max |
|-----|-------|
|-----|-------|

|       |      |
|-------|------|
| 232.1 | 0.10 |
| 143.1 | 5.52 |
| 132.1 | 4.65 |
| 131.1 | 4.83 |
| 129.0 | 4.70 |
| 120.1 | 15.6 |
| 119.1 | 100  |
| 118.1 | 24.6 |
| 117.1 | 6.71 |
| 115.0 | 5.19 |
| 105.1 | 12.3 |
| 95.1  | 4.57 |
| 91.1  | 31.8 |
| 79.1  | 5.46 |
| 77.0  | 6.03 |

### 3.02 (+)-**2**: (+)-isopulegol

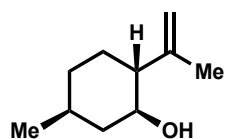

(+)-Isopulegol was prepared following a modification<sup>5</sup> of a reported procedure<sup>6</sup> in decagram scale with a 68% yield. Silica gel chromatography was employed with 18% Et<sub>2</sub>O/hexanes as the solvent system. Characterization data corresponds to that previously reported.

### 3.03 **3**: sulfonate precursor to (–)-8-Phenylmenthol

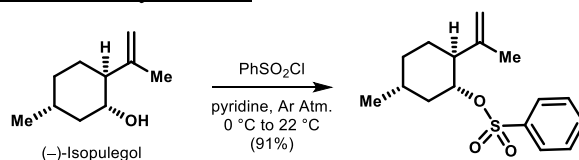

A magnetically stirred 250 mL round-bottom flask was charged with anhydrous pyridine ([0.8M], 81 mL) and (–)-isopulegol (64.8 mmol, 11 mL, 1.0 eq.) at 0 °C under an atmosphere of argon gas. To this solution was added benzenesulfonyl chloride (77.8 mmol, 10 mL, 1.2 eq.) in a slow but steady stream at 0 °C. The ice bath was then removed to allow the reaction to warm to ambient temperature. The reaction was stirred for 18 hours, at which point TLC indicated high conversion to the desired product. Cold water (150 mL) was added to the reaction and stirred at 0 °C for 1 hour. A pink/white solid (the desired product) precipitated from this solution. This precipitate was filtered off over a ground glass frit and rinsed several times with cold water. After air-drying, the desired product was dried under high vacuum for >24 hrs. to remove excess water and pyridine.

[5] J. Peng; H. Zhanao; C. Zhaogang; C. Wenchang; Z. Jinbao; Z. Changzheng (Faming Zhuanli Shenqing Gongkai Shuomingshu), CN101602651, **2009**.

[6] Y. Nakatani, K. Kawashima, *Synthesis* **1978**, 1978, 147-148.

The pink color gradually faded over time. The title compound was obtained in 91% yield (17.3 g.) without need for further purification.

**Characterization data of sulfonate ester **3**:**

$R_f$  0.51 (25% Et<sub>2</sub>O in hexanes, stains blue in anisaldehyde)

$^1\text{H NMR}$  (400 MHz, CDCl<sub>3</sub>)  
 $\delta$  7.90 – 7.83 (m, 2H), 7.60 (t,  $J$  = 7.5 Hz, 1H), 7.53 – 7.45 (m, 2H), 4.66 (dt,  $J$  = 1.7, 0.8 Hz, 1H), 4.59 (p,  $J$  = 1.6 Hz, 1H), 4.47 (td,  $J$  = 10.8, 4.5 Hz, 1H), 2.24 (dddd,  $J$  = 12.4, 4.9, 3.3, 1.8 Hz, 1H), 2.13 (ddd,  $J$  = 12.6, 10.6, 3.8 Hz, 1H), 1.72 – 1.58 (m, 2H), 1.51 (m, 1H), 1.41 (s, 3H), 1.39 – 1.18 (m, 2H), 0.92 (t,  $J$  = 6.5 Hz, 3H), 0.98 – 0.84 (m, 1H)

$^{13}\text{C NMR}$  (101 MHz, CDCl<sub>3</sub>)  
 $\delta$  145.0, 137.8, 133.4, 128.9, 128.0, 113.1, 83.6, 50.9, 41.9, 33.8, 31.7, 30.5, 22.0, 19.4

ESI-LCMS  $m/z$  = 317.2 (M + Na)<sup>+</sup>

**3.04 *ent*-3: sulfonate precursor to (+)-8-phenylmenthol**

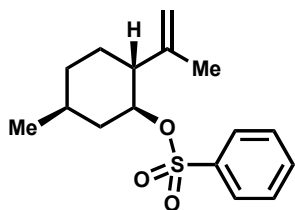

A magnetically stirred 50 mL round-bottom flask was charged with (+)-isopulegol (9.59 mmol, 1.48g, 1.0 eq.) and anhydrous pyridine ([0.8 M], 12 mL) at 0 °C under a positive atmosphere of argon. To this solution, benzenesulfonyl chloride (12.47 mmol, 1.59 mL, 1.3 eq.) was added dropwise at 0 °C. The ice bath was removed and the reaction was stirred for 12 hours. Water (20 mL) was added to the reaction to precipitate the desired product from solution, which was filtrated with a Büchner funnel and rinsed with water. After air-drying for one hour, the pink/white solid was dried under high vacuum overnight to remove traces of water and pyridine. The pink color gradually faded over time. The title compound was obtained in 88% yield (2.48 g) without need for further purification. Characterization data matches that of **3**.

**3.05 (+)-1: (+)-8-phenylmenthol**

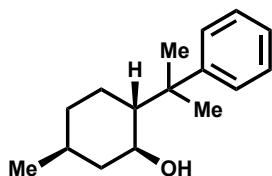

Following General Procedure 2.2B, sulfonate ester *ent*-**3** (2.45g, 8.39 mmol, 1.0 eq.), Mn(OAc)<sub>3</sub> (2.25g, 8.39 mmol, 1 eq.) and Mn(dpm)<sub>3</sub> (381 mg, 0.629 mmol, 7.5 mol%) were added to a flame-dried 1 L round-bottom flask under a positive argon atmosphere. After three high-vacuum/argon cycles, degassed isopropanol was added via cannula (336 mL, [0.025 M], degassed by bubbling argon for one hour under sonication). The flask was transferred to a cold room at 4 °C and left to equilibrate for one hour. Cold TBHP (1.79 mL, [9.4 M] in hexanes, 2 eq.) was added to the stirring solution via the wall of the flask, followed by the slow addition of cold phenylsilane (1.09 mL, 8.84 mmol, 1.05 eq.). After 2 weeks, the reaction was removed from the cold room and concentrated *in vacuo*. The remaining material was washed and filtered with excess hexanes, to obtain a yellow/copper oil. This crude material was purified by silica gel chromatography with 13% diethyl

ether in hexanes to yield 1.32 g (68% yield) of (+)-8-phenylmenthol as a clear, pale yellow oil. Characterization data matches that of (–)-**1**.

Opt. Rot.  $[\alpha]_D^{22} +23.5^\circ$  (c = 2.0 in EtOH, 22 °C)

The optical purity for 8-phenylmenthol (+)-**1** and (–)-**1** was established by chiral HPLC analysis.

(–)-**1** (–)-8-phenylmenthol – 100% *ee*

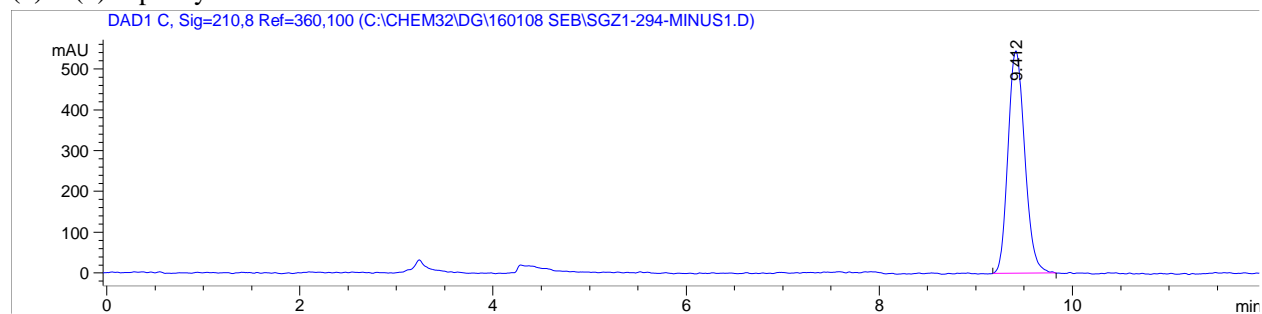

Signal 2: DAD1 C, Sig=210,8 Ref=360,100

| Peak # | RetTime [min] | Type | Width [min] | Area [mAU*s] | Height [mAU] | Area %   |
|--------|---------------|------|-------------|--------------|--------------|----------|
| 1      | 9.412         | BB   | 0.1908      | 6578.77148   | 545.24707    | 100.0000 |

Totals : 6578.77148 545.24707

(+)-**1** (+)-8-phenylmenthol – 96% *ee*.

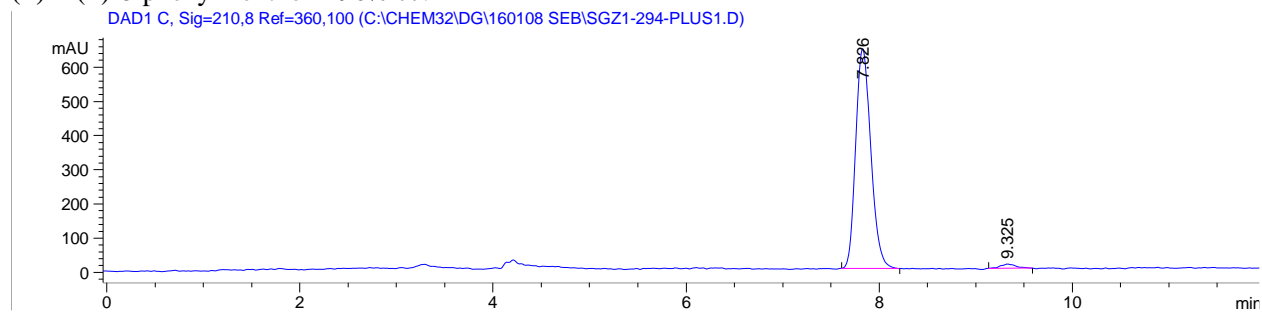

Signal 2: DAD1 C, Sig=210,8 Ref=360,100

| Peak # | RetTime [min] | Type | Width [min] | Area [mAU*s] | Height [mAU] | Area %  |
|--------|---------------|------|-------------|--------------|--------------|---------|
| 1      | 7.826         | BB   | 0.1718      | 7050.32764   | 643.54315    | 97.8921 |
| 2      | 9.325         | BB   | 0.1502      | 151.81441    | 12.99945     | 2.1079  |

Totals : 7202.14204 656.54260

### 3.06 **SI-01**: sulfonate precursor to **4a**

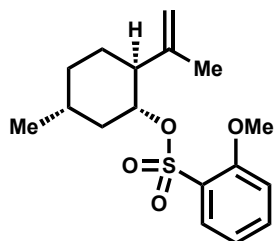

General Procedure 2.1B was followed, treating (–)-isopulegol (2.42 mmol, 0.41 mL, 1.0 eq.) with sulfonyl chloride<sup>7</sup> (3.15 mmol, 651 mg, 1.3 eq.) in pyridine [0.8 M]. Sulfone ester **SI-01** was obtained as a pale yellow viscous oil (675 mg, 86% yield).

#### Characterization data of sulfonate ester **SI-01**:

$R_f$  0.22 (35% EtO<sub>2</sub>/Hex, anisaldehyde, stains dark blue)

<sup>1</sup>H NMR (500 MHz, CDCl<sub>3</sub>)

<sup>1</sup>H NMR (500 MHz, Chloroform-*d*)  $\delta$  7.88 (dd,  $J$  = 7.9, 1.8 Hz, 1H), 7.55 (ddd,  $J$  = 8.4, 7.4, 1.8 Hz, 1H), 7.00 (td,  $J$  = 7.7, 1.0 Hz, 1H), 6.97 (dd,  $J$  = 8.4, 1.0 Hz, 1H), 4.61 (dt,  $J$  = 1.7, 0.8 Hz, 1H), 4.52 (p,  $J$  = 1.6 Hz, 1H), 4.47 (td,  $J$  = 10.8, 4.5 Hz, 1H), 3.91 (s, 3H), 2.26 (dtd,  $J$  = 12.4, 4.8, 4.1, 1.8 Hz, 1H), 2.15 (ddd,  $J$  = 12.6, 10.6, 3.8 Hz, 1H), 1.70 – 1.59 (m, 2H), 1.54 – 1.42 (m, 1H), 1.42 (s, 3H), 1.37 – 1.21 (m, 2H), 0.91 (d,  $J$  = 6.6 Hz, 3H), 0.98 – 0.84 (m, 1H)

<sup>13</sup>C NMR (151 MHz, CDCl<sub>3</sub>)

<sup>13</sup>C NMR (126 MHz, DMSO)  $\delta$  157.8, 145.2, 135.3, 130.9, 125.6, 119.9, 112.4, 112.2, 84.0, 56.0, 50.9, 42.1, 33.8, 31.7, 30.8, 22.0, 19.4

ESI-LCMS 347.1 [M+Na]<sup>+</sup>

### 3.07 **4a**: 8-(*o*-anisole)menthol

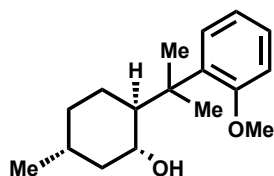

Compound **4a** was obtained following procedure **2.1B**. Specifically, compound **SI-01** (0.13 mmol, 43 mg.), Mn(dpm)<sub>3</sub> (1.01 eq, 80 mg.), TBHP (2.0 eq, 28.2  $\mu$ L of a 9.4 M solution in hexanes), PhSiH<sub>3</sub> (1.05 eq., 17.2  $\mu$ L) and degassed *i*-PrOH ([0.025 M], 5.3 mL) were used. The reaction was stirred at room temperature for 4 hours, during which time the solution turned color from black to clear and yellow. The solution was concentrated directly *in vacuo*, and the resulting residue was purified by FCC on silica with a gradient of

<sup>7</sup> R. R. Milburn, V. Snieckus, *Angew. Chem. Int. Ed. Engl.* **2004**, *43*, 892-894.



hexanes to 10% Et<sub>2</sub>O/hex to 20% Et<sub>2</sub>O/hex. The desired compound was obtained as a pale yellow oil in 80% yield (28 mg.).

**Characterization data of 8-arylmenthol **4a**:**

R<sub>f</sub> 0.30 (20% Et<sub>2</sub>O in hexanes, stains blue in anisaldehyde)

Opt. Rot. -26.6° (c = 1.00 in CH<sub>2</sub>Cl<sub>2</sub>, 21 °C)

<sup>1</sup>H NMR (600 MHz, CDCl<sub>3</sub>)

<sup>1</sup>H NMR (600 MHz, Chloroform-*d*) δ 7.29 (dd, *J* = 7.8, 1.7 Hz, 1H), 7.21 (td, *J* = 7.7, 1.7 Hz, 1H), 6.94 – 6.88 (m, 2H), 3.85 (s, 3H), 3.57 (td, *J* = 10.4, 4.3 Hz, 1H), 2.35 (ddd, *J* = 12.1, 10.0, 3.4 Hz, 1H), 1.84 (dtd, *J* = 12.3, 3.8, 2.1 Hz, 1H), 1.68 – 1.60 (m, 2H), 1.45 (s, 3H), 1.44 – 1.35 (m, 1H), 1.37 (s, 3H), 1.24 – 1.18 (m, 1H), 1.01 (qd, *J* = 13.9, 13.3, 3.8 Hz, 1H), 0.97 – 0.90 (m, 1H), 0.89 (d, *J* = 6.6 Hz, 3H), 0.90 – 0.82 (m, 1H)

<sup>13</sup>C NMR (151 MHz, CDCl<sub>3</sub>)

<sup>13</sup>C NMR (151 MHz, CDCl<sub>3</sub>) δ 158.4, 139.0, 127.7, 126.3, 121.0, 112.4, 73.2, 55.3, 49.3, 45.3, 40.2, 35.3, 31.7, 26.7, 26.3, 24.7, 22.2

GC-MS (EI) Retention time: 9.19 minutes

| m/z   | % Max |
|-------|-------|
| 262.2 | 1.68  |
| 244.2 | 2.54  |
| 161.1 | 1.96  |
| 150.1 | 11.27 |
| 149.1 | 100   |
| 148.1 | 3.11  |
| 135.1 | 5.03  |
| 134.1 | 1.61  |
| 133.1 | 3.03  |
| 131.1 | 1.58  |
| 122.1 | 1.98  |
| 121.1 | 22.16 |
| 119.1 | 1.95  |
| 115.1 | 5.16  |
| 109.1 | 1.64  |
| 105.1 | 3.74  |
| 103   | 1.80  |
| 79.1  | 2.24  |
| 77.1  | 3.68  |
| 55.1  | 2.31  |

### 3.08 **SI-02**: sulfonate precursor to **4b**

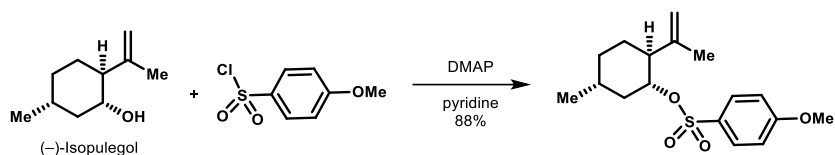

A magnetically stirred 50 mL round-bottom flask was charged with a solution of (-)-isopulegol (10.0 mmol, 1.69 mL, 1.0 eq.) in anhydrous pyridine (20 mL) at 22 °C under an atmosphere of air. To this solution was added 4-methoxybenzenesulfonyl chloride (18.0 mmol, 3.72 g, 1.8 eq.) and DMAP (1.0 mmol, 122 mg). The reaction vessel was capped and allowed to stir for 12 hours, at which point TLC indicated incomplete conversion. An additional portion of 4-methoxybenzenesulfonyl chloride (6.0 mmol, 1.24 g, 0.6 eq.) was added at this point, the reaction vessel was capped and allowed to stir another 12 hours. The reaction mixture was then quenched with water (50 mL) and precipitated solids were collected on a fritted filter funnel. Collected solids were then slurried with half-saturated sodium bicarbonate solution (50 mL, to remove residual sulfonate and pyridine), collected via filtration, and washed with water (2x 50 mL). After air-drying, resulting solids were dried 24 hours under high vacuum to remove residual water. Sulfonate ester **SI-02** was obtained as a white solid (2.87 g, 88%). NMR analysis indicated no further purification was necessary, but if desired, resulting sulfonate ester may be chromatographed on silica gel using toluene as the eluant.

#### Characterization data of sulfonate ester **SI-02**:

$R_f$  0.45 (100% toluene, anisaldehyde)

$^1\text{H NMR}$  (400 MHz,  $\text{CDCl}_3$ )

$\delta$  7.79 (d,  $J = 8.8$  Hz, 2H), 6.95 (d,  $J = 8.8$  Hz, 2H), 4.74 – 4.54 (m, 2H), 4.43 (td,  $J = 10.8$ , 4.5 Hz, 1H), 3.87 (s, 3H), 2.29 – 2.19 (m, 1H), 2.17 – 2.06 (m, 1H), 1.70 – 1.59 (m, 2H), 1.55 – 1.42 (m, 4H), 1.38 – 1.17 (m, 2H), 0.97 – 0.84 (m, 4H).

$^{13}\text{C NMR}$  (101 MHz,  $\text{CDCl}_3$ )

$\delta$  163.5, 145.1, 130.1, 129.4, 114.1, 113.0, 83.0, 55.8, 50.9, 41.9, 33.8, 31.7, 30.5, 22.0, 19.4.

$\text{ESI-LCMS}$   $m/z = 325.1$  ( $M + 1$ )<sup>+</sup>

### 3.09 **4b**: 8-(*p*-anisole)menthol

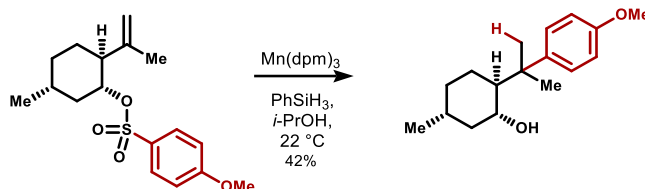

Compound **4b** (36.7 mg, 42.4%) was prepared according to General Procedure 2.2A with the following adjustments: 1.0 equiv. substrate **SI-02** (0.33 mmol, 107 mg) was treated with 1.1 equiv.  $\text{Mn(dpm)}_3$  (.363 mmol, 220 mg) and 1.22 equiv phenylsilane (0.406 mmol, 50  $\mu\text{L}$ ) in *i*-PrOH (3.33 mL), reaction time = 36 hours.

**Characterization data of 8-aryl-menthol **4b**:**

R<sub>f</sub> 0.15 (100% toluene, blue spot with anisaldehyde stain)

Opt. Rot. [ $\alpha$ ]<sub>D</sub><sup>21</sup> = -13.5° (c = 0.915, EtOH)

<sup>1</sup>H NMR (600 MHz, CDCl<sub>3</sub>)

δ 7.31 (d, *J* = 8.8 Hz, 2H), 6.86 (d, *J* = 8.8 Hz, 2H), 3.78 (s, 3H), 3.52 (td, *J* = 10.3, 4.2 Hz, 1H), 1.84 (ddd, *J* = 12.2, 5.9, 3.7 Hz, 1H), 1.74 (dq, *J* = 13.2, 3.3 Hz, 1H), 1.70 – 1.59 (m, 2H), 1.44 – 1.33 (m, 4H), 1.27 (s, 3H), 1.08 – 0.99 (m, 2H), 0.95 – 0.82 (m, 5H).

<sup>13</sup>C NMR (151 MHz, CDCl<sub>3</sub>)

δ 157.7, 143.3, 126.9, 114.0, 73.1, 55.4, 54.3, 45.4, 39.2, 35.1, 31.6, 29.5, 26.6, 24.0, 22.2.

GC-MS (EI) Retention time: 9.73 Minutes.

| <i>m/z</i> | % Max   |
|------------|---------|
| 262.1      | 0.56%   |
| 244.1      | 2.35%   |
| 229.1      | 3.00%   |
| 187.1      | 0.76%   |
| 173.1      | 3.00%   |
| 161.1      | 8.64%   |
| 149.1      | 100.00% |
| 121.1      | 12.13%  |
| 91.0       | 6.99%   |

**3.10 SI-03: Sulfonate precursor to **5a****

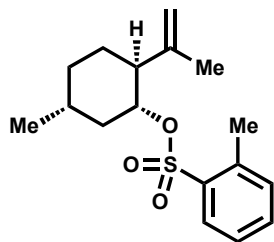

Following General Procedure 2.1A, the sulfonyl chloride (0.75 mmol, 144 μL, 1.5 eq.) was added to a cold solution of (–)-isopulegol (0.50 mmol, 84.6 μL, 1.0 eq.) in pyridine [0.8 M]. Extraction with H<sub>2</sub>O and CH<sub>2</sub>Cl<sub>2</sub>, followed by silica gel FCC afforded sulfone ester **SI-03** as a clear, viscous oil (123 mg, 80%).

**Characterization data of sulfonate ester **SI-03**:**

R<sub>f</sub> 0.41 (10% Et<sub>2</sub>O in hexanes, stains blue in anisaldehyde)

<sup>1</sup>H NMR (500 MHz, CDCl<sub>3</sub>)

δ 7.94 (dd, *J* = 8.1, 1.2 Hz, 1H), 7.46 (td, *J* = 7.5, 1.2 Hz, 1H), 7.28 (dq, *J* = 7.3, 3.5 Hz, 2H), 4.64 (s, 1H), 4.56 – 4.52 (m, 1H), 4.43 (td, *J* = 10.8, 4.5 Hz, 1H), 2.60 (s, 3H), 2.23 (ddt, *J* = 12.3, 4.8, 1.8 Hz, 1H), 2.15 (ddd, *J* = 12.6, 10.8, 3.8 Hz, 1H), 1.63 (ddt, *J* = 12.8, 8.6, 3.2 Hz, 2H), 1.46 (ttt, *J* = 14.7, 8.3, 7.5, 4.2 Hz, 1H), 1.35 – 1.32 (m, 3H), 1.32 – 1.17 (m, 2H), 1.05 – 0.92 (m, 4H)

<sup>13</sup>C NMR (126 MHz, CDCl<sub>3</sub>)

δ 144.77, 138.81, 136.34, 133.37, 132.42, 129.26, 125.88, 113.10, 83.46, 51.18, 41.92, 33.72, 31.66, 30.66, 21.94, 20.77, 18.68.

GC-MS (EI) Retention time: 10.18 min

| m/z | % Max |
|-----|-------|
| 55  | 24.0  |
| 65  | 26.0  |
| 67  | 26.0  |
| 69  | 28.0  |
| 79  | 49.0  |
| 80  | 39.0  |
| 81  | 100   |
| 90  | 54.9  |
| 91  | 13.8  |
| 92  | 39.2  |
| 93  | 44.5  |
| 94  | 38.0  |
| 107 | 54.0  |
| 108 | 22.0  |
| 109 | 23.0  |
| 121 | 74.0  |
| 136 | 78.0  |
| 308 | 0.25  |

### 3.11 **5a**: 8-(*o*-tolyl)menthol

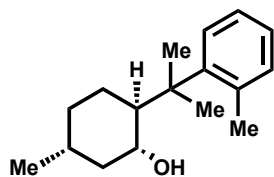

Compound **5a** was prepared according to procedure **2.2a**. Specifically, substrate **SI-03** (1.0 eq., 0.213 mmol., 66.0 mg.), Mn(dpm)<sub>3</sub> (1.0 eq., 130.4 mg.), TBHP (2.0 eq., 45.5 μL, 0.428 mmol), degassed *i*-PrOH ([0.025 M], 8.6 mL, and PhSiH<sub>3</sub> (1.05 eq., 27.6 μL) were used. The reaction was stirred for 5 hours during which time the reaction changed color from black to light yellow. The reaction was concentrated *in vacuo*, suspended in hexanes, filtered through a plug of celite (rinsing with hexanes) and the filtrate was concentrated. The resulting residue was purified by FCC on silica with 25% Et<sub>2</sub>O/hexanes. The compound was still partially impure and so was purified further by prep plate with 100% toluene as the eluent. The desired compound **5a** was obtained as a clear, pale yellow oil in 29% yield (15.8 mg.).

**Characterization data of 8-arylmenthol **5a**:**

*R<sub>f</sub>* 0.24 (100% toluene, stains purple in anisaldehyde)

**Opt. Rot.** -13.3 ° (c = 0.54 in CH<sub>2</sub>Cl<sub>2</sub>, 20 °C)

**<sup>1</sup>H NMR** (600 MHz, CDCl<sub>3</sub>)

<sup>1</sup>H NMR (600 MHz, Chloroform-*d*) δ 7.40 – 7.35 (m, 1H), 7.17 – 7.08 (m, 3H), 3.63 (td, *J* = 10.2, 4.3 Hz, 1H), 2.55 (s, 3H), 2.10 (ddd, *J* = 12.5, 9.7, 3.3 Hz, 1H), 1.86 (dtd, *J* = 12.4, 4.0, 2.2 Hz, 1H), 1.68 – 1.58 (m, 2H), 1.52 (s, 3H), 1.45 – 1.35 (m, 1H), 1.40 (s, 3H), 1.12 (br s, 1H), 1.06 (qd, *J* = 13.7, 3.8 Hz, 1H), 0.98 – 0.81 (m, 2H), 0.89 (d, *J* = 6.5 Hz, 3H)

**<sup>13</sup>C NMR** (151 MHz, CDCl<sub>3</sub>)

<sup>13</sup>C NMR (151 MHz, CDCl<sub>3</sub>) δ 148.8, 136.6, 133.5, 126.4, 126.3, 126.0, 73.0, 50.5, 45.3, 41.3, 35.2, 31.6, 27.1, 26.8, 26.3, 23.9, 22.2

**GC-MS (EI)** Retention time: 9.05 minutes

| m/z   | % Max |
|-------|-------|
| 246.2 | 0.76  |
| 228.2 | 4.47  |
| 145.1 | 2.71  |
| 134.1 | 13.35 |
| 133.2 | 100   |
| 132.1 | 25.18 |
| 131.1 | 2.70  |
| 129.1 | 2.70  |
| 128.1 | 2.83  |
| 119.1 | 7.46  |
| 117.1 | 6.79  |
| 115.1 | 6.08  |
| 106.1 | 3.26  |
| 105.1 | 36.1  |
| 93.1  | 4.64  |
| 91.1  | 9.25  |
| 77.1  | 3.24  |

**3.12 SI-04: sulfonate precursor to **5b****

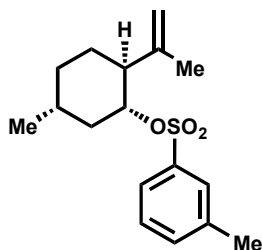

General Procedure 2.1A was followed, using 2.0 eq. of sulfonyl chloride (1.0 mmol, 145 μL) to yield sulfone ester **SI-04** as a clear oil which solidified to a white crystalline solid (134 mg, 87%) upon freezing temperatures.

Characterization data of sulfonate ester **SI-04**:

|                           |                                                                                                                                                                                                                                                                                                                                                                                                                                                                                                                                         |
|---------------------------|-----------------------------------------------------------------------------------------------------------------------------------------------------------------------------------------------------------------------------------------------------------------------------------------------------------------------------------------------------------------------------------------------------------------------------------------------------------------------------------------------------------------------------------------|
| <u>R<sub>f</sub></u>      | 0.28 (10% EtOAc/hex, anisaldehyde)                                                                                                                                                                                                                                                                                                                                                                                                                                                                                                      |
| <u><sup>1</sup>H NMR</u>  | (600 MHz, CDCl <sub>3</sub> )<br><sup>1</sup> H NMR (600 MHz, Chloroform- <i>d</i> ) δ 7.69 – 7.75 (m, 2H), 7.42 – 7.35 (m, 2H), 4.67 (s, 1H), 4.61 (p, <i>J</i> = 1.6 Hz, 1H), 4.46 (td, <i>J</i> = 10.8, 4.5 Hz, 1H), 2.42 (d, <i>J</i> = 0.7 Hz, 3H), 2.26 (dddd, <i>J</i> = 12.4, 4.8, 3.5, 1.8 Hz, 1H), 2.13 (ddd, <i>J</i> = 12.6, 10.5, 3.8 Hz, 1H), 1.70 – 1.60 (m, 2H), 1.55 – 1.45 (m, 1H), 1.41 (s, 3H), 1.38 – 1.29 (m, 1H), 1.25 (td, <i>J</i> = 12.4, 11.0 Hz, 1H), 0.92 (d, <i>J</i> = 6.5 Hz, 3H), 0.98 – 0.86 (m, 1H). |
| <u><sup>13</sup>C NMR</u> | (151 MHz, CDCl <sub>3</sub> )<br><sup>13</sup> C NMR (151 MHz, CDCl <sub>3</sub> ) δ 145.1, 139.1, 137.6, 134.1, 128.8, 128.4, 125.1, 113.0, 83.4, 50.9, 42.0, 33.8, 31.7, 30.5, 22.0, 21.4, 19.4                                                                                                                                                                                                                                                                                                                                       |
| <u>ESI-LCMS</u>           | 331.1 (M+Na) <sup>+</sup>                                                                                                                                                                                                                                                                                                                                                                                                                                                                                                               |

3.13 **5b**: 8-(*m*-tolyl)menthol

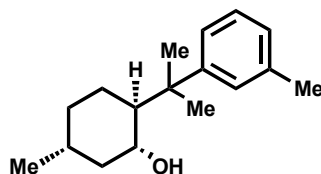

Compound **5b** was prepared according to procedure **2.2A**. Specifically, substrate **SI-04** (1.0 eq., 0.162 mmol., 50 mg.), Mn(dpm)<sub>3</sub> (1.0 eq., 130.4 mg.), degassed *i*-PrOH ([0.1 M], 1.6 mL, and PhSiH<sub>3</sub> (1.0 eq., 20 μL) were used. The reaction was stirred for 24 hours, then the reaction was concentrated *in vacuo*, and the resulting residue was purified by FCC on silica with 10% EtOAc/hexanes. The desired compound **5b** was obtained as a clear, pale yellow oil in 41% yield (16.3 mg.).

Characterization data of 8-arylmenthol **5b**:

|                           |                                                                                                                                                                                                                                                                                                                                                                                                                                            |
|---------------------------|--------------------------------------------------------------------------------------------------------------------------------------------------------------------------------------------------------------------------------------------------------------------------------------------------------------------------------------------------------------------------------------------------------------------------------------------|
| <u>R<sub>f</sub></u>      | 0.36 (25% Et <sub>2</sub> O/hex, stains purple in anisaldehyde)                                                                                                                                                                                                                                                                                                                                                                            |
| <u>Opt. Rot.</u>          | -29.8° (c = 0.95 in CH <sub>2</sub> Cl <sub>2</sub> , 24 °C)                                                                                                                                                                                                                                                                                                                                                                               |
| <u><sup>1</sup>H NMR</u>  | (600 MHz, CDCl <sub>3</sub> )<br><sup>1</sup> H NMR (600 MHz, Chloroform- <i>d</i> ) δ 7.24 – 7.18 (m, 3H), 7.03 – 6.98 (m, 1H), 3.54 (ddt, <i>J</i> = 14.2, 10.1, 3.8 Hz, 1H), 2.35 (s, 3H), 1.84 (dtd, <i>J</i> = 12.4, 4.0, 2.4 Hz, 1H), 1.79 – 1.69 (m, 2H), 1.65 (ddd, <i>J</i> = 12.9, 6.0, 3.5 Hz, 1H), 1.44 – 1.35 (m, 1H), 1.40 (s, 3H), 1.27 (s, 3H), 1.12 – 0.97 (m, 2H), 0.88 (d, <i>J</i> = 6.5 Hz, 3H), 0.97 – 0.80 (m, 2H). |
| <u><sup>13</sup>C NMR</u> | (151 MHz, CDCl <sub>3</sub> )<br><sup>13</sup> C NMR (151 MHz, CDCl <sub>3</sub> ) δ 151.4, 138.1, 128.5, 126.8, 126.7, 122.9, 73.1, 54.3, 45.3, 39.7, 35.1, 31.6, 29.3, 26.6, 23.9, 22.2, 21.9                                                                                                                                                                                                                                            |
| <u>GC-MS (EI)</u>         | Retention time: 8.78 minutes                                                                                                                                                                                                                                                                                                                                                                                                               |

| m/z   | % Max |
|-------|-------|
| 246.1 | 0.15  |
| 157.1 | 2.61  |
| 145.1 | 3.06  |
| 135.1 | 3.72  |
| 134.1 | 22.0  |
| 133.1 | 100   |
| 132.1 | 17    |
| 131.1 | 2.54  |
| 119.1 | 9.15  |
| 117   | 4.86  |
| 115.1 | 4.42  |
| 105.1 | 20.0  |
| 93.1  | 5.25  |
| 91.1  | 7.29  |
| 77.1  | 3.23  |

### 3.14 **SI-05**: sulfonate precursor to **5c**

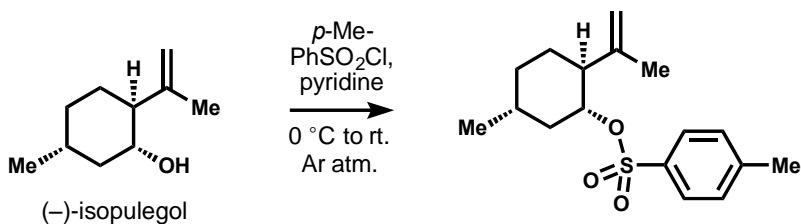

A magnetically stirred 10 mL round-bottom flask was charged with a solution of (-)-isopulegol (2.0 mmol, 340  $\mu$ L, 1.0 eq.) in anhydrous pyridine ([0.8M], 2.5 mL) at 0  $^{\circ}$ C under an atmosphere of argon. To this solution 4-toluenesulfonyl chloride (2.4 mmol, 460 mg, 1.2 eq.) was added in one portion at 0  $^{\circ}$ C. The ice bath was then removed and the reaction was stirred for 18 hours, at which point TLC indicated high conversion to the desired product. Cold water (~2 mL) was added to the reaction and stirred at 0  $^{\circ}$ C for 1 hour. A pink/white solid (the desired product) precipitated from this solution. This precipitate was filtered off over a ground glass frit and rinsed several times with cold water. After air-drying, the desired product was dried under high vacuum for >24 hrs to remove excess water and pyridine. The title compound **SI-05** was obtained in 80% yield (491 mg.) without need for further purification.

Characterization data of sulfonate ester **SI-05**:

R<sub>f</sub> 0.58 (25% Et<sub>2</sub>O in hexanes, stains blue in anisaldehyde)

<sup>1</sup>H NMR (400 MHz, CDCl<sub>3</sub>)

<sup>1</sup>H NMR (400 MHz, Chloroform-*d*) δ 7.74 (d, *J* = 8.0 Hz, 2H), 7.28 (d, *J* = 8.0 Hz, 2H), 4.67 (s, 1H), 4.61 (m, 1H), 4.45 (td, *J* = 10.8, 4.5 Hz, 1H), 2.43 (s, 3H), 2.29 – 2.19 (m, 1H), 2.18 – 2.07 (m, 1H), 1.65 (m, 2H), 1.50 (m, 1H), 1.43 (s, 3H), 1.40 – 1.17 (m, 2H), 0.92 (d, *J* = 5.6 Hz), 0.98 – 0.84 (m, 1H)

<sup>13</sup>C NMR (101 MHz, CDCl<sub>3</sub>)

<sup>13</sup>C NMR (101 MHz, CDCl<sub>3</sub>) δ 145.0, 144.3, 134.8, 129.5, 128.0, 113.1, 83.2, 51.0, 41.9, 33.8, 31.7, 30.5, 22.0, 21.8, 19.4

ESI-LCMS *m/z* = 331.2 (M+Na)<sup>+</sup>

3.15 **5c**: 8-(*p*-tolyl)menthol

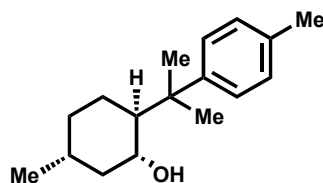

Compound **5c** was prepared from **SI-05** following method 2.2A. Specifically, compound **SI-07** (50.0 mg, 1.0 eq., 0.162 mmol), Mn(dpm)<sub>3</sub> (1.0 eq, 98 mg.), PhSiH<sub>3</sub> (1.0 eq., 20 μL) and *i*-PrOH ([0.1 M], 1.62 mL) were used. The starting material **SI-07** was not completely consumed after 24 hours, so 1.0 eq. more PhSiH<sub>3</sub> was added. After another 24 hours, the desired compound **5c** (20.5 mg., 51% yield) was isolated as a slightly opaque pale yellow oil after FCC on silica with 100% toluene as the eluent system.

Characterization data of 8-arylmenthol **5c**:

R<sub>f</sub> 0.26 (100% toluene, stains dark blue/purple with anisaldehyde)

Opt. Rot. -16.2° (c = 0.408 in CH<sub>2</sub>Cl<sub>2</sub>, 23 °C)

<sup>1</sup>H NMR (600 MHz, CDCl<sub>3</sub>)

<sup>1</sup>H NMR (600 MHz, Chloroform-*d*) δ 7.29 (dt, *J* = 8.3, 2.3 Hz, 2H), 7.14 (d, *J* = 7.7 Hz, 2H), 3.57 – 3.48 (m, 1H), 2.31 (s, 3H), 1.84 (dtd, *J* = 12.4, 3.9, 2.4 Hz, 1H), 1.79 – 1.68 (m, 2H), 1.65 (dq, *J* = 12.9, 3.5, 2.3 Hz, 1H), 1.40 (s, 3H), 1.44-1.33 (m, 1H), 1.27 (s, 3H), 1.11 – 0.96 (m, 2H), 0.88 (d, *J* = 6.6 Hz, 3H), 0.97 – 0.79 (m, 2H)

<sup>13</sup>C NMR (151 MHz, CDCl<sub>3</sub>)

<sup>13</sup>C NMR (151 MHz, CDCl<sub>3</sub>) δ 148.4, 135.5, 129.4, 125.8, 73.1, 54.3, 45.3, 39.5, 35.1, 31.6, 29.4, 26.6, 23.9, 22.2, 21.0

GC-MS (EI) Retention time: 8.93 minutes.



| m/z   | % Max |
|-------|-------|
| 246.2 | 0.57  |
| 145.1 | 3.44  |
| 134.1 | 11.9  |
| 133.1 | 100   |
| 132.1 | 12.7  |
| 119.1 | 4.63  |
| 117.1 | 4.07  |
| 105.1 | 16.3  |
| 93.1  | 4.07  |
| 91.1  | 5.76  |
| 77.0  | 2.69  |

### 3.16 **SI-06**: sulfonate precursor to **6a**

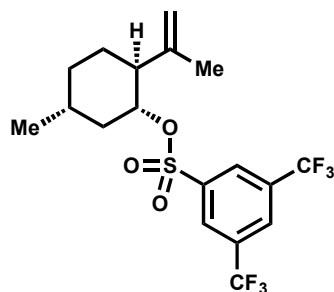

Employing General Procedure 2.1B, 2.0 eq. of sulfonyl chloride (156 mg, 2.0 eq.) were used to give, after silica gel FCC, sulfone ester **SI-06** as white crystalline needles (59 mg, 55%).

#### Characterization data of sulfonate ester **SI-06**:

$R_f$  0.24 (4% Et<sub>2</sub>O/hex, anisaldehyde)

<sup>1</sup>H NMR (600 MHz, CDCl<sub>3</sub>)

<sup>1</sup>H NMR (600 MHz, Chloroform-*d*) δ 8.31 (s, 2H), 8.10 (s, 1H), 4.62 (s, 1H), 4.60 (td, *J* = 10.9, 4.6 Hz, 1H), 4.53 (s, 1H), 2.39 – 2.30 (m, 1H), 2.15 (ddd, *J* = 12.4, 10.6, 3.8 Hz, 1H), 1.74 – 1.64 (m, 2H), 1.62 – 1.53 (m, 1H), 1.41 (s, 3H), 1.40 – 1.27 (m, 2H), 0.97 (d, *J* = 6.5 Hz, 3H), 1.01 – 0.90 (m, 1H)

<sup>13</sup>C NMR (126 MHz, CDCl<sub>3</sub>)

<sup>13</sup>C NMR (126 MHz, CDCl<sub>3</sub>) δ 145.0, 140.5, 132.9 (q, *J* = 34.7 Hz), 128.3 (q, *J* = 3.2 Hz), 126.8 (sep, *J* = 3.3 Hz), 122.53 (q, *J* = 273.6 Hz), 113.2, 85.9, 50.7, 42.3, 33.6, 31.8, 30.5, 21.9, 19.7

<sup>19</sup>F NMR (376 MHz, CDCl<sub>3</sub>). Not calibrated.

<sup>19</sup>F NMR (376 MHz, CDCl<sub>3</sub>) δ -63.3

MALDI-TOF 431.11 [M+H]<sup>+</sup>, 453.09 [M+Na]<sup>+</sup>

### 3.17 **6a**: 8-[3,5-bis(trifluoromethyl)phenyl]menthol

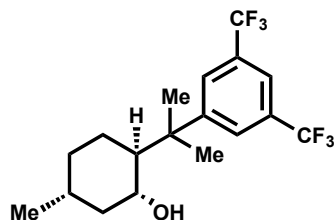

Compound **6a** was prepared following procedure **2.2A** with some modifications. Specifically, compound **SI-06** (0.023 mmol, 10 mg.),  $\text{Mn(dpm)}_3$  (1.2 eq, 16.5 mg.),  $\text{PhSiH}_3$  (1.0 eq., 3.4  $\mu\text{L}$ ) and degassed *i*-PrOH ([0.04 M], 550  $\mu\text{L}$ ) were used. The reaction was stirred at room temperature for 24 hours, concentrated directly *in vacuo*, and the resulting residue was purified by FCC on silica with a 15%  $\text{Et}_2\text{O}$ /hexanes. The desired compound **6a** was obtained as a pale yellow oil in 84% yield (7 mg.).

#### Characterization data of 8-arylmenthol **6a**:

- $R_f$  0.4 (25%  $\text{Et}_2\text{O}$ /hex, stains pale purple/pink in anisaldehyde)
- Opt. Rot.**  $-18.3^\circ$  ( $c = 0.342$  in  $\text{CH}_2\text{Cl}_2$ ,  $24^\circ\text{C}$ )
- $^1\text{H NMR}$**  (600 MHz,  $\text{CDCl}_3$ )  
 $^1\text{H NMR}$  (600 MHz, Chloroform-*d*)  $\delta$  7.78 (s, 2H), 7.67 (s, 1H), 3.47 (td,  $J = 10.4, 4.1$  Hz, 1H), 1.86 (dtd,  $J = 12.3, 3.9, 2.2$  Hz, 1H), 1.66 – 1.59 (m, 2H), 1.55 – 1.47 (m, 1H), 1.49 (s, 3H), 1.45 – 1.37 (1H), 1.37 (s, 3H), 1.02 – 0.91 (m, 2H), 0.91 – 0.80 (m, 1H), 0.88 (d,  $J = 6.5$ , 3H), 0.68 (s, 1H)
- $^{13}\text{C NMR}$**  (151 MHz,  $\text{CDCl}_3$ )  
 $^{13}\text{C NMR}$  (151 MHz,  $\text{CDCl}_3$ )  $\delta$  154.6, 131.1 (q,  $J = 32.6$ ), 126.3 (q,  $J = 2.7$ ), 123.8 (q,  $J = 272.7$  Hz), 119.4 (sep,  $J = 4.0$  Hz), 73.1, 54.2, 46.4, 40.9, 34.7, 31.7, 27.3, 26.8, 26.3, 22.0
- $^{19}\text{F NMR}$**  (376 MHz,  $\text{CDCl}_3$ ). Not calibrated.  
 $^{19}\text{F NMR}$  (376 MHz,  $\text{CDCl}_3$ )  $\delta$  -62.9 (s)
- GC-MS (EI)** Retention time: 7.46 minutes

| m/z   | % Max |
|-------|-------|
| 368.4 | -     |
| 255.1 | 10.3  |
| 254.1 | 12.5  |
| 237.1 | 13.3  |
| 227.1 | 22.9  |
| 113.1 | 30.0  |
| 112.1 | 3.50  |
| 96.1  | 13.0  |
| 95.1  | 100   |
| 93.1  | 3.52  |
| 81.1  | 5.41  |

|      |      |
|------|------|
| 71.1 | 3.17 |
| 69.1 | 7.67 |
| 67.1 | 9.98 |
| 57.1 | 5.93 |
| 55.1 | 7.93 |

### 3.18 **SI-07**: sulfonate precursor to **6b**

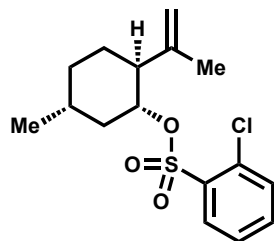

Compound **6b** was prepared according to procedure **2.1A** with the some modifications. Specifically, (–)-isopulegol (1.0 eq., 1.0 mmol, 169  $\mu$ L), 2-chlorobenzene sulfonyl chloride (2.0 eq, 272  $\mu$ L), and anhydrous pyridine ([0.5 M], 2 mL) were used, and the reaction was conducted at room temperature. The reaction was complete within 7 hours, at which point the reaction was quenched with H<sub>2</sub>O (2 mL), extracted with Et<sub>2</sub>O (3x 5 mL), and the organic layer was dried over MgSO<sub>4</sub>. After filtration and concentration *in vacuo*, the resulting residue was purified by FCC in 5% EtOAc/hex. The desired compound **SI-07** was initially obtained as a slightly opaque, pale yellow viscous oil, which upon sitting crystallized as a white crystalline solid in 85% yield (281 mg.).

#### Characterization data of sulfonate ester **SI-07**:

R<sub>f</sub> 0.4 (10% EtOAc/hex, stains purple in anisaldehyde)

<sup>1</sup>H NMR (600 MHz, CDCl<sub>3</sub>)

<sup>1</sup>H NMR (600 MHz, Chloroform-*d*)  $\delta$  8.06 – 8.01 (m, 1H), 7.55 – 7.48 (m, 2H), 7.38 (ddd, *J* = 7.9, 5.2, 3.4 Hz, 1H), 4.64 (s, 1H), 4.57 (td, *J* = 10.9, 4.6 Hz, 1H), 4.53 (p, *J* = 1.6 Hz, 1H), 2.22 – 2.15 (m, 2H), 1.69 (dq, *J* = 13.6, 3.5 Hz, 1H), 1.63 (dq, *J* = 12.3, 3.5, 2.0 Hz, 1H), 1.53 – 1.44 (m, 1H), 1.48 (s, 3H), 1.35 – 1.24 (m, 2H), 0.91 (d, *J* = 6.4 Hz, 3H), 0.97 – 0.87 (m, 1H)

<sup>13</sup>C NMR (151 MHz, CDCl<sub>3</sub>)

<sup>13</sup>C NMR (151 MHz, CDCl<sub>3</sub>)  $\delta$  144.6, 136.1, 134.2, 133.5, 132.0, 131.0, 126.8, 113.0, 85.3, 50.8, 41.8, 33.7, 31.8, 30.8, 22.0, 19.6

ESI-LCMS 351.2 (M+Na)<sup>+</sup>

### 3.19 **6b**: 8-(2-chlorophenyl)menthol

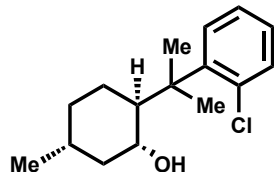

A 5 mL round bottom flask was charged with a stir bar, substrate **SI-07** (1.0 eq., 0.12 mmol, 40.0 mg.), and  $\text{Mn(dpm)}_3$  (1.0 eq., 73.6 mg.). The reaction vessel was evacuated and refilled with nitrogen gas 3x successively, and then placed under an Argon atmosphere. Anhydrous and degassed *i*-PrOH ([0.1 M], 1.2 mL) was next added, followed by  $\text{PhSiH}_3$  (1.0 eq., 15  $\mu\text{L}$ ). The reaction was stirred for 24 hours, then the reaction was concentrated to dryness and purified by FCC on silica with 100% toluene as eluent. The desired compound **6b** was obtained as a clear yellow oil in 80% yield (26 mg.).

#### Characterization data of 8-arylmenthol **6b**:

$R_f$  (25%  $\text{Et}_2\text{O}$ /hex, stains pale purple/pink in anisaldehyde)

Opt. Rot.  $-29.9^\circ$  ( $c = 1.00$  in  $\text{CH}_2\text{Cl}_2$ ,  $22^\circ\text{C}$ )

$^1\text{H}$  NMR (600 MHz,  $\text{CDCl}_3$ )

$^1\text{H}$  NMR (600 MHz, Chloroform-*d*)  $\delta$  7.41 (dd,  $J = 8.0, 1.7$  Hz, 1H), 7.34 (dd,  $J = 7.8, 1.5$  Hz, 1H), 7.19 (ddd,  $J = 8.0, 7.3, 1.5$  Hz, 1H), 7.12 (ddd,  $J = 7.8, 7.3, 1.7$  Hz, 1H), 3.59 (td,  $J = 10.4, 4.2$  Hz, 1H), 2.60 (ddd,  $J = 12.0, 9.9, 3.4$  Hz, 1H), 1.87 (dtd,  $J = 12.3, 3.9, 2.3$  Hz, 1H), 1.67 – 1.49 (m, 2H), 1.58 (s, 3H), 1.45 (s, 3H), 1.44 – 1.35 (m, 1H), 1.03 – 0.92 (m, 2H), 0.89 (d,  $J = 6.5$  Hz, 3H), 0.92 – 0.76 (m, 2H)

$^{13}\text{C}$  NMR (151 MHz,  $\text{CDCl}_3$ )

$^{13}\text{C}$  NMR (151 MHz,  $\text{CDCl}_3$ )  $\delta$  147.9, 133.6, 132.4, 128.0, 127.3, 127.0, 73.4, 48.7, 45.9, 41.7, 35.1, 31.8, 27.0, 25.9, 25.5, 22.1

GC-MS (EI) Retention time: 9.32 minutes

| m/z   | % Max |
|-------|-------|
| 266.1 | -     |
| 248.2 | 2.74  |
| 230.2 | 25.0  |
| 155.1 | 36.0  |
| 154.1 | 33.0  |
| 153.0 | 98.0  |
| 152.0 | 62.0  |
| 139.0 | 16.0  |
| 128.1 | 11.0  |
| 127.0 | 36.0  |
| 125.0 | 100   |
| 119.1 | 24.0  |
| 117.1 | 13.0  |

|       |      |
|-------|------|
| 115.1 | 25.0 |
| 103.1 | 10.0 |
| 95.1  | 42.0 |
| 91.1  | 20.0 |
| 77.1  | 12.0 |
| 55.1  | 12.7 |

### 3.20 **SI-08**: sulfonate precursor to **6c**

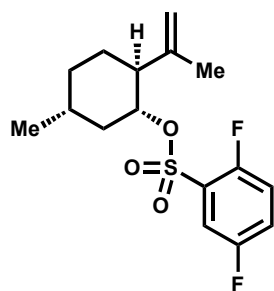

Compound **SI-08** was obtained following the standard procedure 2.1A. Specifically, (–)-isopulegol (0.2 mmol, 1.0 eq., 34  $\mu$ L), 2,5-difluorobenzene sulfonyl chloride (1.5 eq., 0.3 mmol, 40.4  $\mu$ L) and anhydrous pyridine ([0.8 M], 250  $\mu$ L) were used. The reaction was stirred for 24 hours, quenched by the addition of cold water and the desired compound precipitated as a yellow-tinged white powder, which was isolated by filtration in 85% yield (56 mg.)

#### Characterization data of sulfonate ester **SI-08**:

$R_f$  0.5 (25% Et<sub>2</sub>O/hex, stains blue/purple in anisaldehyde)

**<sup>1</sup>H NMR** (600 MHz, CDCl<sub>3</sub>)

<sup>1</sup>H NMR (600 MHz, Chloroform-*d*)  $\delta$  7.58 (ddd,  $J$  = 7.5, 5.2, 3.2 Hz, 1H), 7.29 (ddt,  $J$  = 9.0, 7.0, 3.4 Hz, 1H), 7.17 (td,  $J$  = 8.9, 4.0 Hz, 1H), 4.65 (s, 1H), 4.59 (dt,  $J$  = 10.9, 5.5 Hz, 1H), 4.56 (p,  $J$  = 1.6 Hz, 1H), 2.25 (dddd,  $J$  = 12.3, 4.7, 3.5, 1.9 Hz, 1H), 2.17 (ddd,  $J$  = 12.5, 10.6, 3.9 Hz, 1H), 1.71 (dq,  $J$  = 13.7, 3.5 Hz, 1H), 1.65 (dddd,  $J$  = 13.0, 6.6, 3.3, 1.9 Hz, 1H), 1.51 (s, 3H), 1.59 – 1.45 (m, 1H), 1.39 – 1.27 (m, 2H), 0.94 (d,  $J$  = 6.5, 3H), 1.01 – 0.88 (m, 1H)

**<sup>13</sup>C NMR** (151 MHz, CDCl<sub>3</sub>)

<sup>13</sup>C NMR (151 MHz, Chloroform-*d*)  $\delta$  157.7 (d,  $J$  = 247.9 Hz), 155.6 (d,  $J$  = 255.3), 144.7, 127.1 (dd,  $J$  = 16.7, 6.9 Hz), 122.3 (dd,  $J$  = 23.8, 8.2 Hz), 118.7 (dd,  $J$  = 23.9, 7.6 Hz), 117.3 (d,  $J$  = 27.2 Hz), 113.1, 86.0, 50.7, 42.0, 33.7, 31.8, 30.7, 21.9, 19.7

**<sup>19</sup>F NMR** (376 MHz, CDCl<sub>3</sub>). Not calibrated.

<sup>19</sup>F NMR (376 MHz, Chloroform-*d*)  $\delta$  -112.7 (d,  $J$  = 17.8 Hz), -116.4 (d,  $J$  = 17.8 Hz)

**ESI-LCMS** 331.12 [M+H]<sup>+</sup>, 353.10 [M+Na]<sup>+</sup>

### 3.21 **6c**: 8-(2,5-difluorophenyl)menthol

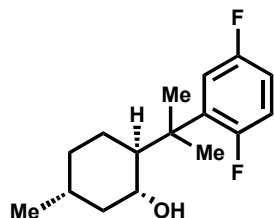

Compound **6c** was obtained following general procedure **2.2A** with some modification. Specifically, compound **SI-08** (0.151 mmol, 50 mg.),  $\text{Mn(dpm)}_3$  (1.0 eq, 91.5 mg.), TBHP (2.0 eq, 28.2  $\mu\text{L}$  of a 9.4 M solution in hexanes),  $\text{PhSiH}_3$  (1.05 eq., 19.5  $\mu\text{L}$ ) and degassed *i*-PrOH ([0.025 M], 6.04 mL) were used. The reaction was stirred at room temperature for 4 hours, during which time the solution turned color from black to clear and yellow. The solution was concentrated directly *in vacuo*, and the resulting residue was purified by FCC on silica with a gradient of hexanes to 5%  $\text{Et}_2\text{O}$ /hex to 10%  $\text{Et}_2\text{O}$ /hex. The desired compound was obtained as a pale yellow oil in 91% yield (37 mg.).

#### Characterization data of 8-arylmenthol **6c**:

$R_f$  0.46 (25%  $\text{Et}_2\text{O}$ /hex, stains grey/green in anisaldehyde)

Opt. Rot.  $-31.1^\circ$  ( $c = 1.61$  in  $\text{CH}_2\text{Cl}_2$ , 23  $^\circ\text{C}$ )

$^1\text{H NMR}$  (600 MHz,  $\text{CDCl}_3$ )

$^1\text{H NMR}$  (600 MHz, Chloroform-*d*)  $\delta$  6.98 (ddd,  $J = 10.4, 6.3, 3.2$  Hz, 1H), 6.93 (ddd,  $J = 11.7, 8.9, 4.9$  Hz, 1H), 6.83 (ddt,  $J = 8.9, 6.9, 3.3$  Hz, 1H), 3.55 (tdd,  $J = 10.4, 4.3, 2.4$  Hz, 1H), 2.01 (dddd,  $J = 11.9, 10.0, 3.5, 1.6$  Hz, 1H), 1.87 (dtd,  $J = 12.3, 3.8, 2.2$  Hz, 1H), 1.64 – 1.57 (m, 1H), 1.53 (dq,  $J = 13.2, 3.4$  Hz, 1H), 1.46 (s, 3H), 1.45 – 1.36 (m, 1H), 1.33 (s, 3H), 1.31 – 1.14 (m, 1H), 1.03 – 0.91 (m, 2H), 0.89 (d,  $J = 6.6$  Hz, 3H), 0.91 – 0.80 (m, 2H)

$^{13}\text{C NMR}$  (151 MHz,  $\text{CDCl}_3$ )

$^{13}\text{C NMR}$  (151 MHz, Chloroform-*d*)  $\delta$  158.7 (dd,  $J = 240.7, 2.2$  Hz), 157.4 (dd,  $J = 243.0, 2.2$  Hz), 140.5 (dd,  $J = 14.2, 6.5$  Hz), 117.3 (dd,  $J = 28.3, 8.8$  Hz), 114.3 (dd,  $J = 25.2, 6.6$  Hz), 113.5 (dd,  $J = 23.9, 9.5$  Hz), 73.1, 50.8, 46.0, 40.2, 34.9, 31.8, 26.9, 25.4, 25.3, 22.1 (Peaks at 30.0 and 27.6 are impurities)

$^{19}\text{F NMR}$  (376 MHz,  $\text{CDCl}_3$ ). Not calibrated.

$^{19}\text{F NMR}$  (376 MHz, Chloroform-*d*)  $\delta$  -114.73 (d,  $J = 17.8$  Hz), -119.29 (d,  $J = 17.8$  Hz)

GC-MS (EI) Retention time: 8.29 minutes.

| m/z   | % Max |
|-------|-------|
| 268.1 | 1.51  |
| 168.1 | 11.7  |
| 156.1 | 39.2  |
| 155.1 | 100   |
| 154.1 | 74.7  |
| 153.1 | 10.6  |
| 141.1 | 28.0  |

|       |      |
|-------|------|
| 127.0 | 85.0 |
| 113.1 | 17.2 |
| 96.1  | 10.7 |
| 95.1  | 78.2 |
| 69.1  | 9.59 |
| 67.1  | 12.6 |
| 55.1  | 11.2 |

### 3.22 **SI-09**: sulfonate precursor to **7**

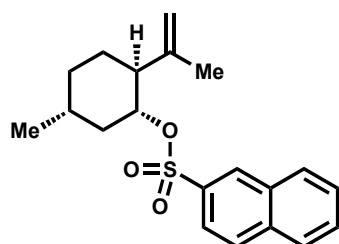

General Procedure 2.1B was followed, using 2.0 eq. of sulfonyl chloride (227 mg) in pyridine [1.0 M], which after precipitation with water and filtration produced sulfone ester **SI-09** as an off-white/pink solid (171 mg, 93%).

#### Characterization data of sulfonate ester **SI-09**:

$R_f$  0.46 (25% Et<sub>2</sub>O/Hexanes, anisaldehyde)

<sup>1</sup>H NMR (500 MHz, CDCl<sub>3</sub>)

<sup>1</sup>H NMR (500 MHz, Chloroform-*d*) δ 8.44 (s, 1H), 8.01 – 7.88 (m, 3H), 7.83 (dd, *J* = 8.6, 1.8 Hz, 1H), 7.63 (m, 2H), 4.66 (s, 1H), 4.58 – 4.50 (td, *J* = 6.3, 4.5 Hz, 1H), 4.54 (s, 1H), 2.33 – 2.25 (m, 1H), 2.14 (ddd, *J* = 12.3, 10.5, 3.8 Hz, 1H), 1.70 – 1.59 (m, 2H), 1.51 (m, 1H), 1.36 (s, 3H), 1.35 – 1.22 (m, 2H), 0.91 (d, *J* = 6.6 Hz, 3H), 0.97 – 0.85 (m, 1H)

<sup>13</sup>C NMR (126 MHz, CDCl<sub>3</sub>)

<sup>13</sup>C NMR (126 MHz, CDCl<sub>3</sub>) δ 144.9, 135.2, 134.7, 132.0, 129.4, 129.3, 129.2 (2C), 128.0, 127.7, 123.1, 113.1, 83.6, 50.9, 42.0, 33.7, 31.7, 30.5, 21.9, 19.4 (Overlapping peaks at 129.2)

ESI-LCMS 367.1 (M+Na)<sup>+</sup>

### 3.23 7: 8-(2-naphthyl)menthol

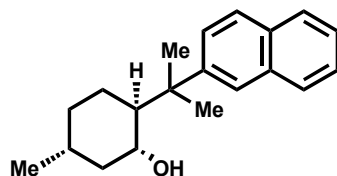

Compound **7** was prepared from compound **SI-09** via method 2.2A. Specifically, compound **SI-09** (50.0 mg, 1.0 eq., 0.1645 mmol),  $\text{Mn}(\text{dpm})_3$  (1.0 eq, 88 mg.),  $\text{PhSiH}_3$  (1.0 eq., 18  $\mu\text{L}$ ) and isopropanol ([0.1 M], 1.45 mL) were used. After 24 hours, precipitates that had formed in the reaction were filtered off and the reaction was concentrated *in vacuo*. The resulting residue was purified by FCC in 10%  $\text{Et}_2\text{O}$ /hex. The desired compound **7** (27 mg.) was obtained as a viscous pale yellow oil in 66% yield.

#### Characterization data of 8-arylmenthol **7**:

$R_f$  0.33 (25%  $\text{Et}_2\text{O}$  in hexanes, stains green in anisaldehyde); 0.21 (10%  $\text{Et}_2\text{O}$  in hexanes, stains green in anisaldehyde)

Opt. Rot.  $-26.0^\circ$  ( $c = 1.01$  in  $\text{CH}_2\text{Cl}_2$ ,  $24^\circ\text{C}$ )

$^1\text{H}$  NMR (600 MHz,  $\text{CDCl}_3$ )

$^1\text{H}$  NMR (600 MHz, Chloroform-*d*)  $\delta$  7.83 – 7.77 (m, 3H), 7.77 (d,  $J = 1.9$  Hz, 1H), 7.58 (dd,  $J = 8.7, 2.0$  Hz, 1H), 7.48 – 7.40 (m, 2H), 3.60 (td,  $J = 10.3, 4.2$  Hz, 1H), 1.89 – 1.80 (m, 2H), 1.71 (dq,  $J = 13.4, 3.5$  Hz, 1H), 1.67 – 1.61 (m, 1H), 1.55 (s, 3H), 1.39 (s, 3H), 1.46 – 1.33 (m, 1H), 1.08 (tdd,  $J = 13.3, 12.1, 3.5$  Hz, 1H), 1.01 (s, 1H), 0.95 (td,  $J = 12.3, 10.8$  Hz, 1H), 0.88 (d,  $J = 6.5$  Hz, 3H), 0.91 – 0.82 (m, 1H)

$^{13}\text{C}$  NMR (151 MHz,  $\text{CDCl}_3$ )

$^{13}\text{C}$  NMR (151 MHz,  $\text{CDCl}_3$ )  $\delta$  149.1, 133.5, 131.9, 128.2, 128.1, 127.5, 126.1, 125.6, 125.3, 123.3, 73.2, 53.9, 45.5, 40.2, 35.0, 31.7, 28.5, 26.7, 24.8, 22.1

GC-MS (EI) Retention time: 11.21 minutes.

| m/z   | % Max |
|-------|-------|
| 282.2 | 1.41  |
| 264.2 | 6.79  |
| 249.1 | 6.88  |
| 193.1 | 9.07  |
| 179.1 | 7.86  |
| 178.1 | 7.30  |
| 170.1 | 29.8  |
| 169.1 | 100   |
| 168.1 | 14.4  |
| 167.1 | 7.05  |
| 165.1 | 13.3  |
| 155.1 | 10.7  |
| 154.1 | 7.44  |



|       |      |
|-------|------|
| 153.1 | 13.5 |
| 152.1 | 13.2 |
| 141.1 | 25.8 |
| 128.0 | 14.2 |

### 3.24 **SI-10**: sulfonate precursor to **8**

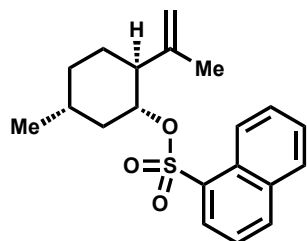

Same modifications to General Procedure 2.1B as for **SI-09**, obtaining a white solid (158mg, 92%).

#### Characterization data of sulfonate ester **SI-12**:

$R_f$  0.51 (25% Et<sub>2</sub>O/hex, anisaldehyde)

$^1\text{H NMR}$  (600 MHz, CDCl<sub>3</sub>)

$^1\text{H NMR}$  (600 MHz, Chloroform-*d*)  $\delta$  8.60 (dq,  $J$  = 8.7, 1.0 Hz, 1H), 8.24 (dd,  $J$  = 7.3, 1.3 Hz, 1H), 8.08 (d,  $J$  = 8.2 Hz, 1H), 7.91 (dd,  $J$  = 8.0, 1.4 Hz, 1H), 7.61 (m, 2H), 7.52 (t,  $J$  = 7.8 Hz, 1H), 4.49 (td,  $J$  = 10.9, 4.5 Hz, 1H), 4.43 (s, 1H), 4.11 (p,  $J$  = 1.6 Hz, 1H), 2.25 (dddd,  $J$  = 12.4, 4.8, 3.4, 1.7 Hz, 1H), 2.09 (ddd,  $J$  = 12.6, 10.5, 3.7 Hz, 1H), 1.63 – 1.56 (m, 2H), 1.47 (ttd,  $J$  = 12.1, 6.6, 3.4 Hz, 1H), 1.30 – 1.17 (m, 2H), 1.14 (s, 3H), 0.88 (d,  $J$  = 6.5 Hz, 3H), 0.92 – 0.83 (m, 1H)

$^{13}\text{C NMR}$  (151 MHz, CDCl<sub>3</sub>)

$^{13}\text{C NMR}$  (151 MHz, CDCl<sub>3</sub>)  $\delta$  144.4, 134.9, 134.1, 133.4, 129.4, 128.9, 128.5, 128.2, 127.1, 126.2, 123.9, 113.0, 84.2, 50.9, 41.9, 33.7, 31.7, 30.7, 22.0, 19.1

$\text{ESI-LCMS}$  367.1 (M+Na)<sup>+</sup>

### 3.25 **8**: 8-(1-naphthyl)menthol

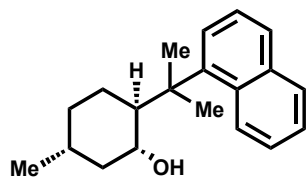

Compound **8** was prepared from compound **SI-10** according to procedure 2.2A. Specifically, compound **SI-10** (50.0 mg, 1.0 eq., 0.145 mmol), Mn(dpm)<sub>3</sub> (1.0 eq, 88 mg.), PhSiH<sub>3</sub> (1.0 eq., 19  $\mu\text{L}$ ), TBHP (2.0 eq. of a 10.0

M solution in hexanes) and isopropanol ([0.05 M], 2.9 mL) were used. TLC analysis indicated that the reaction was complete within 2 hours of the PhSiH<sub>3</sub> addition. The reaction was concentrated *in vacuo* and purified by FCC on silica in a 25% Et<sub>2</sub>O/hexanes solvent system to obtain 32.4 mg (78% yield) of the desired compound **8** as a pale yellow oil. The compound exists as a mixture of rotamers.

**Characterization data of 8-aryl menthol **8**:**

R<sub>f</sub> 0.29 (25% Et<sub>2</sub>O in hexanes, stains blue in anisaldehyde)

Opt. Rot. -29.0° (c = 1.00 in CH<sub>2</sub>Cl<sub>2</sub>, 21 °C)

<sup>1</sup>H NMR (600 MHz, CDCl<sub>3</sub>). T = 323 K  
<sup>1</sup>H NMR (600 MHz, Chloroform-*d*) δ 8.43 (d, *J* = 8.6 Hz, 1H), 7.86 (dd, *J* = 8.0, 1.7 Hz, 1H), 7.71 (d, *J* = 8.1 Hz, 1H), 7.53 (dd, *J* = 7.4, 1.2 Hz, 1H), 7.50 – 7.42 (m, 2H), 7.38 (t, *J* = 7.7 Hz, 1H), 3.73 (td, *J* = 10.2, 4.3 Hz, 1H), 2.57 (ddd, *J* = 12.8, 9.5, 3.4 Hz, 1H), 1.86 (dtd, *J* = 12.4, 3.9, 2.2 Hz, 1H), 1.73 (s, 3H), 1.60 (s, 3H), 1.69 – 1.54 (m, 1H), 1.48 – 1.37 (m, 2H), 1.21 – 1.07 (m, 1H), 0.97 – 0.88 (m, 2H), 0.88 (d, *J* = 6.5 Hz, 3H), 0.89 – 0.79 (m, 1H).  
 (600 MHz, CDCl<sub>3</sub>). T = 298 K  
<sup>1</sup>H NMR (600 MHz, Chloroform-*d*) δ 8.42 (d, *J* = 8.6 Hz, 1H), 7.86 (dd, *J* = 7.9, 1.7 Hz, 1H), 7.72 (dd, *J* = 8.2, 1.2 Hz, 1H), 7.54 (d, *J* = 7.4 Hz, 1H), 7.51 – 7.42 (m, 2H), 7.39 (dd, *J* = 8.1, 7.4 Hz, 1H), 3.72 (td, *J* = 10.1, 4.2 Hz, 1H), 2.57 (ddd, *J* = 12.7, 9.6, 3.5 Hz, 1H), 1.90 – 1.79 (m, 1H), 1.71 (s, 3H), 1.59 (s, 3H), 1.65 – 1.55 (m, 1H), 1.48 – 1.36 (m, 1H), 1.28 (d, *J* = 24.7 Hz, 1H), 1.15 (d, *J* = 6.9 Hz, 1H), 0.87 (d, *J* = 6.5 Hz, 3H), 0.99 – 0.79 (m, 3H).

<sup>13</sup>C NMR (151 MHz, CDCl<sub>3</sub>). T = 323 K  
<sup>13</sup>C NMR (151 MHz, CDCl<sub>3</sub>) δ 147.5, 135.6, 131.8, 130.0, 128.0, 127.0, 125.4, 125.0, 124.8, 123.7, 73.5, 51.4, 45.7, 42.1, 35.3, 31.7, 28.0, 27.7, 27.2, 22.1  
 (151 MHz, CDCl<sub>3</sub>). T = 298 K  
<sup>13</sup>C NMR (151 MHz, CDCl<sub>3</sub>) δ 147.4, 135.5, 131.6, 130.0, 128.0, 126.9, 125.4, 125.0, 124.9, 123.6, 73.4, 51.2, 45.4, 41.9, 35.1, 31.6, 28.0, 27.5, 26.9, 22.1

GC-MS (EI) Retention time: 11.05 minutes.

| m/z   | % Max |
|-------|-------|
| 282.2 | 4.18  |
| 170.1 | 16.2  |
| 169.1 | 100   |
| 168.1 | 5.30  |
| 167.1 | 4.58  |
| 165.1 | 7.87  |
| 155.1 | 6.37  |
| 154.1 | 4.81  |
| 153.1 | 10.4  |
| 152.1 | 7.04  |
| 141.1 | 24.2  |
| 129.1 | 9.16  |
| 128.0 | 9.00  |

### 3.26 **SI-11**: sulfonate precursor to **9**

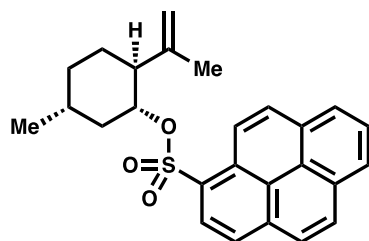

Compound **SI-11** was prepared via procedure **2.2A** by coupling (–)-isopulegol with pyrene-1-sulfonyl chloride. Pyrene-1-sulfonyl chloride was prepared from pyrene-1-sulfonic acid according to a reported procedure.<sup>8</sup>

A 10 mL round bottom flask was charged with a stir bar, pyrene-1-sulfonyl chloride (1.8 eq., 1.43 mmol, 430 mg.; slightly impure), DMAP (0.1 eq.; 9.7 mg.), anhydrous pyridine ([0.16 M], 5 mL) and (–)-isopulegol (1.0 eq., 0.79 mmol, 134  $\mu$ L) under an argon atmosphere. The reaction was stirred at room temperature for 24 hours, at which point H<sub>2</sub>O (5 mL) was added, causing a yellow precipitate to form. The reaction was cooled to 0 °C, stirred for 1 hour, then the sticky yellow precipitate was filtered off. This sticky residue proved unmanageable, so it was dissolved in CH<sub>2</sub>Cl<sub>2</sub> (100 mL) and combined with the filtrate. Water (30 mL) was added to the aqueous layer and extracted with CH<sub>2</sub>Cl<sub>2</sub> (2x 25 mL). The organic layer was washed with CuSO<sub>4</sub> (sat'd. aqu. 1x20 mL), 2M HCl (1x 20 mL), NaHCO<sub>3</sub> (sat'd aqu. 1x 20 mL) and brine (1x 20 mL) and dried over MgSO<sub>4</sub>. This was filtered, concentrated *in vacuo* and the resulting residue was purified by FCC on silica with 15% Et<sub>2</sub>O/hex and then a second time with 75% toluene/hex to obtain the desired product **SI-11** as a bright yellow viscous oil in 45% yield (149 mg.).

#### Characterization data of sulfonate ester **SI-11**:

$R_f$  0.31 (25% Et<sub>2</sub>O/hex, anisaldehyde)

<sup>1</sup>H NMR (500 MHz, CDCl<sub>3</sub>)

<sup>1</sup>H NMR (600 MHz, Chloroform-*d*)  $\delta$  8.91 (d,  $J$  = 9.3 Hz, 1H), 8.66 (d,  $J$  = 8.1 Hz, 1H), 8.31 (d,  $J$  = 7.8 Hz, 1H), 8.29 dd,  $J$  = 8.4, 1.6 Hz, 1H), 8.26 (dd,  $J$  = 9.3, 1.6 Hz, 1H), 8.22 – 8.15 (m, 2H), 8.12 – 8.05 (m, 2H), 4.60 (td,  $J$  = 10.8, 4.5 Hz, 1H), 4.48 (s, 1H), 4.07 (p,  $J$  = 1.6 Hz, 1H), 2.30 – 2.23 (m, 1H), 2.13 (ddd,  $J$  = 12.5, 10.5, 3.7 Hz, 1H), 1.63 – 1.54 (m, 2H), 1.52 – 1.42 (m, 1H), 1.32 – 1.20 (m, 2H), 1.12 (s, 3H), 0.85 (d,  $J$  = 6.5 Hz, 3H), 0.93 – 0.78 (m, 1H)

<sup>13</sup>C NMR (151 MHz, CDCl<sub>3</sub>)

<sup>13</sup>C NMR (151 MHz, CDCl<sub>3</sub>)  $\delta$  144.4, 135.3, 131.0, 130.6, 130.3, 129.8, 129.7, 129.1, 127.1 (2C), 127.0 (2C), 126.9, 125.1, 124.7, 123.8, 123.6, 113.1, 84.0, 51.0, 41.9, 33.7, 31.7, 30.7, 22.0, 19.0

GCMS-TOF 419.17 (M+H)<sup>+</sup>

[8] Yan, N.; Xu, Z.; Diehn, K.K.; Raghavan, S.R.; Fang, Y.; Weiss, R.G. *J. Am. Chem. Soc.*, **2013**, 135 (24), pp 8989–8999.

### 3.27 **9**: 8-(1-pyrenyl)menthol

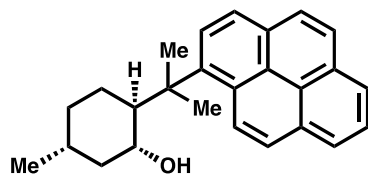

Compound **9** was prepared according to procedure 2.2A with some modification. Specifically, compound **SI-11** (0.35 mmol, 148 mg.), Mn(dpm)<sub>3</sub> (1.01 eq, 214 mg.), TBHP (2.0 eq, 75.2  $\mu$ L of a 9.4 M solution in hexanes), PhSiH<sub>3</sub> (1.05 eq., 45.8  $\mu$ L), degassed *i*-PrOH ([0.025 M], 14 mL) and degassed benzene (1 mL; as cosolvent to help solubilize compound **SI-11**) were used. The reaction was stirred at room temperature for 12 hours, during which time the solution turned color from black to opaque and yellow. The solution was concentrated directly *in vacuo*, and the resulting residue was purified by FCC on silica with a gradient of hexanes to 15% Et<sub>2</sub>O/hex to toluene. A yellow foam was obtained which contained a fluorescent impurity. This material was further purified by prep plate with toluene as the eluent to obtain the desired compound **9** in 25% yield as a yellow foam/semi-solid.

#### Characterization data for 8-aryl-menthol **9**:

|                           |                                                                                                                                                                                                                                                                                                                                                                                                                                                              |
|---------------------------|--------------------------------------------------------------------------------------------------------------------------------------------------------------------------------------------------------------------------------------------------------------------------------------------------------------------------------------------------------------------------------------------------------------------------------------------------------------|
| <u>R<sub>f</sub></u>      | 0.19 (100% toluene, stains purple in anisaldehyde)                                                                                                                                                                                                                                                                                                                                                                                                           |
| <u>Opt. Rot.</u>          | -9.6° (c = 1.00 in CH <sub>2</sub> Cl <sub>2</sub> , 22 °C)                                                                                                                                                                                                                                                                                                                                                                                                  |
| <u><sup>1</sup>H NMR</u>  | (500 MHz, CDCl <sub>3</sub> )<br><sup>1</sup> H NMR (500 MHz, Chloroform- <i>d</i> ) $\delta$ 8.79 (d, <i>J</i> = 9.5 Hz, 1H), 8.28 – 8.16 (m, 5H), 8.11 – 8.05 (m, 3H), 3.86 (ddd, <i>J</i> = 13.2, 9.1, 3.4 Hz, 1H), 2.81 (ddd, <i>J</i> = 12.7, 9.6, 3.4 Hz, 1H), 2.03 – 1.90 (m, 1H), 1.97 (s, 3H), 1.83 (s, 3H), 1.75 – 1.65 (s, 1H), 1.57 – 1.45 (m, 1H), 1.27 (q, <i>J</i> = 12.3, 11.8 Hz, 1H), 0.95 (d, <i>J</i> = 6.6 Hz, 3H), 1.10 – 0.87 (m, 4H) |
| <u><sup>13</sup>C NMR</u> | (151 MHz, CDCl <sub>3</sub> )<br><sup>13</sup> C NMR (126 MHz, DMSO) $\delta$ 145.7, 131.7, 130.4, 130.2, 128.8, 127.6, 127.1, 126.5, 126.2, 126.1, 126.0, 125.5, 125.1 (2C), 124.9, 124.2, 73.5, 52.3, 45.7, 42.3, 35.1, 31.7, 28.4, 27.2, 27.0, 22.1                                                                                                                                                                                                       |
| <u>GC/MS</u>              | Retention time = 23.38 minutes, <i>m/z</i> = 356.21 [M] <sup>+</sup>                                                                                                                                                                                                                                                                                                                                                                                         |

### 3.28 **SI-12**: sulfonate precursor to **10**

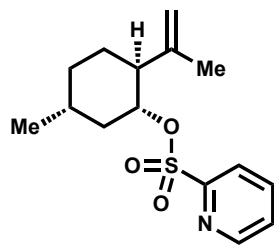

Compound **SI-12** was obtained by sulfonylation of (–)-isopulegol with pyridine-2-sulfonyl chloride following a known procedure.<sup>9</sup>

A 5 mL round bottom flask was charged with a stir bar, anhydrous NEt<sub>3</sub> (0.5 mL, [2.3 M]) and (–)-isopulegol (1.15 mmol, 195 μL) under an Argon atmosphere. The solution was cooled to ~0 °C, then freshly prepared pyridine-2-sulfonyl chloride<sup>9</sup> (1.1 eq., 225 mg.) was added in one portion. The solution was stirred at 0 °C under an Argon atmosphere. After 3.25 hours, cold water (~2 mL) was added and the aqueous solution was extracted with cold Et<sub>2</sub>O (3x 5 mL). The organic layer was washed with NaHCO<sub>3</sub> (3 mL of a 10% aqueous solution of a saturated NaHCO<sub>3</sub> solution, dried over MgSO<sub>4</sub>, filtered and concentrated *in vacuo*. The resulting residue was purified by FCC on silica with a gradient elution of 25% Et<sub>2</sub>O/hex to 60% Et<sub>2</sub>O/hex. The desired compound **SI-12** was obtained in 48% yield (163 mg.; 54% brsm) as a yellow/white fluffy solid.

Characterization data of sulfonate ester **SI-12**:

R<sub>f</sub> 0.13 (25% EtO<sub>2</sub>/hex, anisaldehyde)  
<sup>1</sup>H NMR (600 MHz, CDCl<sub>3</sub>)  
<sup>1</sup>H NMR (400 MHz, Chloroform-*d*) δ 8.77 – 8.69 (m, 1H), 8.02 – 7.95 (m, 1H), 7.91 (td, *J* = 7.8, 1.7 Hz, 1H), 7.57 – 7.49 (m, 1H), 4.74 (td, *J* = 10.9, 4.6 Hz, 1H), 4.62 (s, 1H), 4.52 (s, 1H), 2.33 – 2.22 (m, 1H), 2.15 (ddd, *J* = 12.4, 10.5, 3.8 Hz, 1H), 1.74 – 1.60 (m, 2H), 1.60 – 1.46 (m, 1H), 1.52 (s, 3H), 1.44 – 1.18 (m, 2H), 0.92 (d, *J* = 6.5 Hz, 3H), 0.98 – 0.85 (m, 1H)  
<sup>13</sup>C NMR (151 MHz, CDCl<sub>3</sub>). DEPT-Q  
<sup>13</sup>C NMR (151 MHz, CDCl<sub>3</sub>) δ 155.7, 150.1, 145.0, 138.0, 127.3, 123.2, 112.9, 85.6, 50.9, 41.9, 33.8, 31.7, 30.5, 22.0, 19.9  
ESI-LCMS 613.3 (2M+Na)<sup>+</sup>; 318.1 (M+Na)<sup>+</sup>

3.29 **10**: 8-(2-pyridyl)menthol

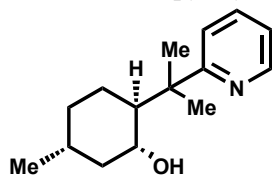

A 10 mL round bottom flask was charged with a stir bar, substrate **SI-12** (1.0 eq., 41.3 mg., 0.14 mmol.) and Mn(dpm)<sub>3</sub> (1.0 eq., 86 mg.). The reaction vessel was evacuated and refilled with nitrogen gas 3x on a vacuum manifold and then placed under positive pressure of Argon. Degassed anhydrous *i*-PrOH ([0.1 M, 1.4 mL) was

[9] Corey, E.J.; Posner, G.H.; Atkinson, R.F.; Wingard, A.K.; Halloran, D.J.; Radzik, D.M.; Nash, J.J. *J. Org. Chem.* **1989**, 54(2), 389-393.

added, followed by PhSiH<sub>3</sub> (1.0 eq., 17.3  $\mu$ L). The reaction was stirred for 24 hours, during the course of which the solution turned from clear and black to opaque and light yellow-brown in color. The precipitate that had formed in the reaction was filtered off and the filtrate was concentrated *in vacuo*. The resulting residue was purified by FCC on silica with a gradient from 100% CH<sub>2</sub>Cl<sub>2</sub> to 50% Et<sub>2</sub>O/hex. The desired compound **10** was obtained as a clear yellow oil in 89% yield (30 mg.)

**Characterization data for 8-aryl menthol **10**:**

R<sub>f</sub> 0.23 (50% Et<sub>2</sub>O/hex, stains pink in anisaldehyde)

Opt. Rot. -13.7° (c = 1.38 in CH<sub>2</sub>Cl<sub>2</sub>, 23 °C)

<sup>1</sup>H NMR (600 MHz, CDCl<sub>3</sub>)

<sup>1</sup>H NMR (600 MHz, Chloroform-*d*)  $\delta$  8.50 (ddd, *J* = 4.9, 1.9, 0.9 Hz, 1H), 7.62 (td, *J* = 7.8, 1.9 Hz, 1H), 7.34 (d, *J* = 8.0 Hz, 1H), 7.09 (ddd, *J* = 7.4, 4.8, 1.1 Hz, 1H), 3.24 (ddd, *J* = 10.6, 4.0 Hz, 1H), 1.92 – 1.76 (m, 3H), 1.69 – 1.59 (m, 1H), 1.40 (s, 3H), 1.39 (s, 3H), 1.46 – 1.31 (m, 1H), 1.04 – 0.92 (m, 2H), 0.86 (d, *J* = 6.6 Hz, 3H), 0.92 – 0.79 (m, 2H)

<sup>13</sup>C NMR (151 MHz, CDCl<sub>3</sub>)

<sup>13</sup>C NMR (151 MHz, CDCl<sub>3</sub>)  $\delta$  169.6, 148.1, 136.8, 120.9, 120.6, 73.3, 53.2, 45.0, 42.7, 35.1, 31.8, 29.8, 26.5, 24.0, 22.2 (Impurity at 30.4 ppm)

GC-MS (EI) Retention time: 8.42 minutes

| m/z   | % Max |
|-------|-------|
| 233.1 | 0.24  |
| 201.2 | 9.25  |
| 200.1 | 59.0  |
| 134.1 | 37.0  |
| 122.1 | 9.66  |
| 121.1 | 100   |
| 120.1 | 52.0  |
| 118.1 | 9.34  |
| 117.1 | 7.67  |
| 106.1 | 24.0  |
| 93.1  | 11.0  |
| 92.0  | 6.68  |
| 79.0  | 6.47  |
| 78.1  | 6.88  |

**3.30 SI-13: sulfonate precursor to **11****

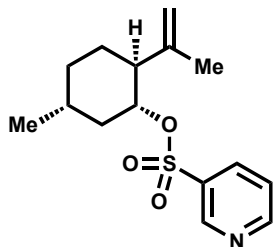

A 5 mL round bottom flask was charged with a stir bar, (–)-isopulegol (1.0 eq., 1.02 mmol, 173  $\mu$ L) and anhydrous NEt<sub>3</sub> ([2.3 M], 435  $\mu$ L). The reaction was placed under positive pressure of Argon and then cooled to 0 °C in an ice bath. Next, pyridine 3-sulfonyl chloride (1.13 mmol, 200 mg., 134  $\mu$ L) was added and the reaction was stirred for four hours, at which point TLC indicated consumption of isopulegol. The reaction was quenched by addition of water (1 mL) and extracted with Et<sub>2</sub>O (3x 2 mL). The organic layer was washed with NaHCO<sub>3</sub> (sat'd. aq., 1x 1 mL), dried over Na<sub>2</sub>SO<sub>4</sub>, filtered and concentrated *in vacuo*. The resulting residue was purified by FCC on silica with 30% Et<sub>2</sub>O/hex as eluent. The desired product **SI-13** was obtained as a yellow-tinged white waxy solid in 84% yield (248 mg.)

Characterization data of sulfonate ester **SI-13**:

|                           |                                                                                                                                                                                                                                                                                                                                                                                                                                                                                                          |
|---------------------------|----------------------------------------------------------------------------------------------------------------------------------------------------------------------------------------------------------------------------------------------------------------------------------------------------------------------------------------------------------------------------------------------------------------------------------------------------------------------------------------------------------|
| <u>R<sub>f</sub></u>      | 0.28 (40% EtO <sub>2</sub> /hex, stains purple in anisaldehyde)                                                                                                                                                                                                                                                                                                                                                                                                                                          |
| <u><sup>1</sup>H NMR</u>  | (600 MHz, CDCl <sub>3</sub> )                                                                                                                                                                                                                                                                                                                                                                                                                                                                            |
|                           | <sup>1</sup> H NMR (600 MHz, Chloroform- <i>d</i> ) $\delta$ 9.06 (d, <i>J</i> = 2.4 Hz, 1H), 8.83 (dd, <i>J</i> = 4.9, 1.6 Hz, 1H), 8.13 (dt, <i>J</i> = 8.0, 2.0 Hz, 1H), 7.44 (ddd, <i>J</i> = 8.0, 4.8, 0.8 Hz, 1H), 4.64 (s, 1H), 4.58 (p, <i>J</i> = 1.6 Hz, 1H), 4.54 (td, <i>J</i> = 10.9, 4.6 Hz, 1H), 2.31 – 2.23 (m, 1H), 2.13 (ddd, <i>J</i> = 12.6, 10.6, 3.9 Hz, 1H), 1.73 – 1.58 (m, 2H), 1.53 (m, 1H), 1.43, (s, 3H), 1.31 (m, 2H), 0.94 (d, <i>J</i> = 6.5 Hz, 3H), 0.97 – 0.88 (m, 1H) |
| <u><sup>13</sup>C NMR</u> | (151 MHz, CDCl <sub>3</sub> )                                                                                                                                                                                                                                                                                                                                                                                                                                                                            |
|                           | <sup>13</sup> C NMR (151 MHz, CDCl <sub>3</sub> ) $\delta$ 153.9, 148.7, 144.9, 135.5, 134.6, 123.5, 113.3, 84.8, 50.7, 42.1, 33.7, 31.8, 30.5, 21.9, 19.6                                                                                                                                                                                                                                                                                                                                               |
| <u>ESI-LCMS</u>           | 296.2 (M+H) <sup>+</sup>                                                                                                                                                                                                                                                                                                                                                                                                                                                                                 |

3.31 **11**: 8-(3-pyridyl)menthol

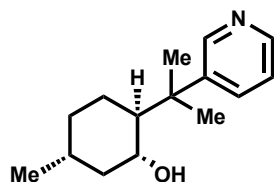

Compound **11** was obtained via the standard procedure **2.2A** with some modification. Specifically, substrate **SI-13** (1.0 eq., 49.1 mg., 0.166 mmol), Mn(dpm)<sub>3</sub> (0.1 eq, 10 mg.), Mn(OAc)<sub>3</sub>•2H<sub>2</sub>O (1.0 eq., 45 mg.), PhSiH<sub>3</sub> (1.05 eq., 21.5  $\mu$ L), TBHP (2.0 eq.) and degassed *i*-PrOH ([0.05 M], 3.3 mL) were used. The reaction was stirred at 4 °C for 48 hours, at which point TLC indicated full consumption of starting material. The reaction was then concentrated *in vacuo*. Water (5 mL) was added to the residue, which was then extracted with Et<sub>2</sub>O (3x 5mL). The organic layer was washed with 2M NaOH (3x 3mL) and brine (1x 3mL), then dried over Na<sub>2</sub>SO<sub>4</sub>. The reaction was filtered and concentrated *in vacuo* to obtain a residue which was purified by FCC over silica with 100% EtOAc as eluent. The desired compound **11** was obtained as viscous yellow oil in 82% yield (32 mg.)

**Characterization data for 8-arylmenthol **11**:**

$R_f$  0.26 (100% EtOAc, stains purple in anisaldehyde)

Opt. Rot.  $-34.0^\circ$  ( $c = 2.08$  in  $\text{CH}_2\text{Cl}_2$ ,  $22^\circ\text{C}$ )

$^1\text{H NMR}$  (600 MHz,  $\text{CDCl}_3$ )

$^1\text{H NMR}$  (600 MHz, Chloroform- $d$ )  $\delta$  8.61 (d,  $J = 2.5$  Hz, 1H), 8.38 (d,  $J = 3.3$  Hz, 1H), 7.66 (dt,  $J = 8.1, 1.9$  Hz, 1H), 7.20 (dd,  $J = 8.1, 4.7$  Hz, 1H), 3.46 (td,  $J = 10.4, 4.2$  Hz, 1H), 1.85 (dtd,  $J = 12.3, 3.9, 2.1$  Hz, 1H), 1.68 – 1.52 (m, 3H), 1.46 (s, 3H), 1.35 (s, 3H), 1.42 – 1.31 (m, 1H), 1.31 – 1.12 (m, 1H), 1.02 – 0.91 (m, 2H), 0.86 (d,  $J = 6.5$  Hz, 3H), 0.90 – 0.75 (m, 1H)

(600 MHz,  $\text{C}_6\text{D}_6$ )

$^1\text{H NMR}$  (600 MHz, Chloroform- $d$ )  $\delta$  8.86 (s, 1H), 8.43 (d,  $J = 4.5$  Hz, 1H), 7.37 (d,  $J = 8.0$  Hz, 1H), 6.82 (dd,  $J = 8.4, 4.6$  Hz, 1H), 3.23 (td,  $J = 10.3, 4.1$  Hz, 1H), 1.91 (s, 1H), 1.74 – 1.63 (m, 1H), 1.46 (td,  $J = 9.7, 9.3, 4.9$  Hz, 1H), 1.43 – 1.32 (m, 2H), 1.39 (s, 3H), 1.29 (s, 3H), 1.06 (m, 1H), 0.86 (q,  $J = 11.7$  Hz, 1H), 0.78 (d,  $J = 6.5$  Hz, 3H), 0.65 (m, 2H)

$^{13}\text{C NMR}$  (151 MHz,  $\text{CDCl}_3$ ). DEPT-Q.

$^{13}\text{C NMR}$  (151 MHz,  $\text{CDCl}_3$ )  $\delta$  148.0, 146.6, 133.7, 123.0, 73.0, 54.1, 46.3, 39.3, 34.8, 31.7, 27.3, 26.8, 26.1, 22.1 (The quaternary aromatic carbon resonance overlaps with one of the other carbon resonances. Cf. with the spectrum in  $\text{C}_6\text{D}_6$ )

(151 MHz,  $\text{C}_6\text{D}_6$ )

$^{13}\text{C NMR}$  (151 MHz,  $\text{CDCl}_3$ )  $\delta$  148.8, 146.8, 146.3, 133.6, 122.8, 72.7, 53.9, 46.8, 39.5, 35.0, 31.8, 27.5, 27.1, 26.8, 22.

GC-MS (EI) Retention time: 9.08 minutes

| m/z   | % Max |
|-------|-------|
| 233.2 | 2.61  |
| 138.1 | 8.91  |
| 122.1 | 9.12  |
| 121.1 | 63.0  |
| 120.1 | 100   |
| 119.1 | 28.0  |
| 118.0 | 5.44  |
| 117.0 | 5.27  |
| 106.1 | 16.0  |
| 93.0  | 4.93  |
| 92.1  | 19.0  |
| 78.0  | 18.0  |



### 3.32 **SI-14**: sulfonate precursor to **12**

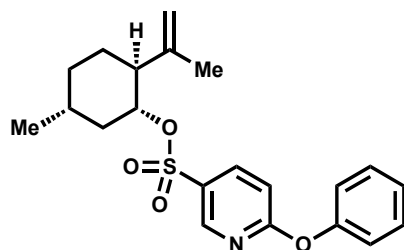

A 5 mL round bottom flask was charged with a stir bar, (–)-isopulegol (1.0 eq., 0.32 mmol., 55  $\mu$ L), 6-phenoxy-pyridine-3-sulfonyl chloride (2.0 eq., 173 mg.) and DMAP (0.1 eq., 3.9 mg.). The reaction vessel was evacuated and filled with nitrogen 3x on a vacuum manifold and then placed under an Argon atmosphere. Anhydrous pyridine ([0.5 M], 640  $\mu$ L) was added and the reaction was stirred for 24 hours. The reaction was concentrated *in vacuo*, diluted with  $\text{CH}_2\text{Cl}_2$  (4 mL), washed with  $\text{H}_2\text{O}$  (1 mL), 2M HCl (aq., 1 mL), and brine (1 mL). The organic layer was dried over  $\text{Na}_2\text{SO}_4$ . The organic residue was concentrated and purified by FCC over silica (25 g.) with a gradient of hexanes (100 mL), 10%  $\text{Et}_2\text{O}$ /hex (100 mL), 20%  $\text{Et}_2\text{O}$ /hex (230 mL), 100%  $\text{Et}_2\text{O}$  (80 mL). The desired product **SI-14** was obtained as a clear, slightly white oil in 47% yield (58 mg.; 66% brsm).

#### Characterization data of sulfonate ester **SI-14**:

|                     |                                                                                                                                                                                                                                                                                                                                                                                                                                                                                    |
|---------------------|------------------------------------------------------------------------------------------------------------------------------------------------------------------------------------------------------------------------------------------------------------------------------------------------------------------------------------------------------------------------------------------------------------------------------------------------------------------------------------|
| $R_f$               | 0.52 (25% $\text{Et}_2\text{O}$ /hex, stains blue in anisaldehyde)                                                                                                                                                                                                                                                                                                                                                                                                                 |
| $^1\text{H NMR}$    | (400 MHz, $\text{CDCl}_3$ )<br>$^1\text{H NMR}$ (400 MHz, Chloroform- <i>d</i> ) $\delta$ 8.62 (s, 1H), 8.07 (d, $J$ = 8.8 Hz, 1H), 7.50 – 7.40 (m, 2H), 7.28 (m, 1H), 7.14 (d, $J$ = 7.9 Hz, 2H), 6.98 (d, $J$ = 8.7 Hz, 1H), 4.67 (s, 1H), 4.63 (s, 1H), 4.49 (td, $J$ = 10.9, 4.6 Hz, 1H), 2.34 – 2.20 (m, 1H), 2.13 (td, $J$ = 11.6, 3.6 Hz, 1H), 1.76 – 1.61 (m, 2H), 1.57 – 1.42 (m, 1H), 1.48 (s, 3H), 1.40 – 1.19 (m, 2H), 0.94 (d, $J$ = 6.3 Hz, 3H), 0.99 – 0.86 (m, 1H) |
| $^{13}\text{C NMR}$ | (101 MHz, $\text{CDCl}_3$ )<br>$^{13}\text{C NMR}$ (101 MHz, $\text{CDCl}_3$ ) $\delta$ 166.5, 153.0, 148.3, 144.9, 139.1, 130.0, 128.8, 125.9, 121.5, 113.2, 111.3, 84.1, 50.8, 42.0, 33.7, 31.7, 30.5, 21.9, 19.7                                                                                                                                                                                                                                                                |
| ESI-LCMS            | 388.2 (M+H) $^+$                                                                                                                                                                                                                                                                                                                                                                                                                                                                   |

### 3.33 **12**: 8-(6-phenoxy-pyrid-3-yl)menthol

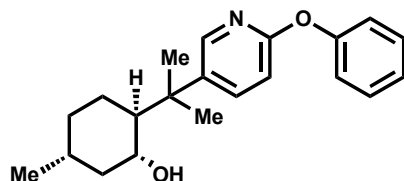

A 5 mL round bottom flask was charged with a stir bar, compound **SI-14** (1.0 eq., 23 mg., 0.06 mmol.), and  $\text{Mn}(\text{dpm})_3$  (1 eq., 36 mg.). The reaction vessel was evacuated and refilled with nitrogen gas 3x successively and then placed under positive pressure of Argon. Degassed *i*-PrOH ([0.1 M], 590  $\mu$ L) was then added. The reaction was sonicated for ~20 min. to help dissolve the substrate.  $\text{PhSiH}_3$  (1.0 eq., 7.3  $\mu$ L) was added in one

portion and the reaction was stirred at ambient temperature. The solution turned opaque and a greyish-yellow color over the course of two hours, and TLC indicated nearly full consumption of starting material **SI-14**. The reaction was stirred for another hour, then concentrated directly *in vacuo* and purified by FCC over silica gel with a gradient of 50% Et<sub>2</sub>O/hex to 100% Et<sub>2</sub>O. The desired product **12** was obtained as a clear colorless oil in 75% yield (15 mg.).

**Characterization data for 8-arylmenthol **12**:**

|                           |                                                                                                                                                                                                                                                                                                                                                                                                                                                                                                   |
|---------------------------|---------------------------------------------------------------------------------------------------------------------------------------------------------------------------------------------------------------------------------------------------------------------------------------------------------------------------------------------------------------------------------------------------------------------------------------------------------------------------------------------------|
| <u>R<sub>f</sub></u>      | 0.21 (25% Et <sub>2</sub> O/hex, stains pink in anisaldehyde)                                                                                                                                                                                                                                                                                                                                                                                                                                     |
| <u>Opt. Rot.</u>          | -12.8° (c = 0.258 in CH <sub>2</sub> Cl <sub>2</sub> , 21 °C)                                                                                                                                                                                                                                                                                                                                                                                                                                     |
| <u><sup>1</sup>H NMR</u>  | (600 MHz, CDCl <sub>3</sub> )                                                                                                                                                                                                                                                                                                                                                                                                                                                                     |
|                           | <sup>1</sup> H NMR (600 MHz, Chloroform- <i>d</i> ) δ 8.18 (dd, <i>J</i> = 2.7, 0.7 Hz, 1H), 7.69 (dd, <i>J</i> = 8.6, 2.7 Hz, 1H), 7.42 – 7.35 (m, 2H), 7.18 (tt, <i>J</i> = 7.4, 1.1 Hz, 1H), 7.16 – 7.10 (m, 2H), 6.84 (dd, <i>J</i> = 8.6, 0.7 Hz, 1H), 3.48 (td, <i>J</i> = 10.3, 4.2 Hz, 1H), 1.86 (dtd, <i>J</i> = 12.3, 3.8, 2.1 Hz, 1H), 1.75 – 1.52 (m, 4H), 1.43 (s, 3H), 1.42 – 1.35 (m, 1H), 1.33 (s, 3H), 1.01 – 0.92 (m, 2H), 0.88 (d, <i>J</i> = 6.5 Hz, 3H), 0.90 – 0.75 (m, 1H) |
| <u><sup>13</sup>C NMR</u> | (151 MHz, CDCl <sub>3</sub> )                                                                                                                                                                                                                                                                                                                                                                                                                                                                     |
|                           | <sup>13</sup> C NMR (151 MHz, CDCl <sub>3</sub> ) δ 161.8, 154.5, 145.2, 141.2, 137.9, 129.8, 124.6, 121.3, 110.8, 73.2, 54.1, 46.3, 38.8, 34.9, 31.7, 27.6, 26.8, 26.3, 22.1. (Impurity at 29.9 ppm)                                                                                                                                                                                                                                                                                             |
| <u>ESI-LCMS</u>           | 326.2 (M+H) <sup>+</sup>                                                                                                                                                                                                                                                                                                                                                                                                                                                                          |

**3.34 SI-15: sulfonate precursor to **13****

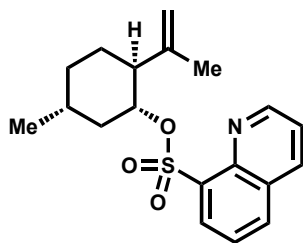

Same modifications to General Procedure 2.1B as for **SI-09**, obtaining an off-white powder (162mg, 88%).

**Characterization data of sulfonate ester **SI-15**:**

|                           |                                                                                                                                                                                                                                                                                                                                                                                                                                                                                                                                                                            |
|---------------------------|----------------------------------------------------------------------------------------------------------------------------------------------------------------------------------------------------------------------------------------------------------------------------------------------------------------------------------------------------------------------------------------------------------------------------------------------------------------------------------------------------------------------------------------------------------------------------|
| <u>R<sub>f</sub></u>      | 0.31 (40% EtOAc/hex, anisaldehyde)                                                                                                                                                                                                                                                                                                                                                                                                                                                                                                                                         |
| <u><sup>1</sup>H NMR</u>  | (400 MHz, CDCl <sub>3</sub> )                                                                                                                                                                                                                                                                                                                                                                                                                                                                                                                                              |
|                           | <sup>1</sup> H NMR (400 MHz, Chloroform- <i>d</i> ) δ 9.14 (dd, <i>J</i> = 4.2, 2.0 Hz, 1H), 8.44 (d, <i>J</i> = 7.4 Hz, 1H), 8.22 (dd, <i>J</i> = 8.3, 2.0 Hz, 1H), 8.07 (d, <i>J</i> = 8.0 Hz, 1H), 7.60 (t, <i>J</i> = 7.8 Hz, 1H), 7.52 (dd, <i>J</i> = 8.5, 4.3 Hz, 1H), 4.68 (td, <i>J</i> = 10.9, 4.5 Hz, 1H), 4.35 (s, 1H), 3.92 (s, 1H), 2.27 (dt, <i>J</i> = 12.9, 3.8 Hz, 1H), 2.13 (td, <i>J</i> = 12.5, 11.7, 3.6 Hz, 1H), 1.66 – 1.56 (m, 2H), 1.56 – 1.42 (m, 1H), 1.38 – 1.18 (m, 2H), 1.17 (s, 3H), 0.89 (d, <i>J</i> = 6.6 Hz, 3H), 0.96 – 0.77 (m, 1 H) |
| <u><sup>13</sup>C NMR</u> | (101 MHz, CDCl <sub>3</sub> )                                                                                                                                                                                                                                                                                                                                                                                                                                                                                                                                              |

$^{13}\text{C}$  NMR (101 MHz,  $\text{CDCl}_3$ )  $\delta$  151.8, 144.8, 144.4, 136.3, 135.4, 134.3, 132.2, 129.0, 125.1, 122.3, 112.2, 85.1, 50.6, 42.2, 33.8, 31.8, 30.8, 22.0, 19.5

ESI-LCMS 346.1 ( $\text{M}+\text{H}$ ) $^+$

### 3.35 **13**: 8-(8-quinolyl)menthol

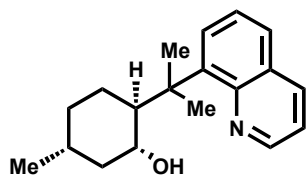

A 10 mL round bottom flask was charged with a stir bar, substrate **SI-17** (1.0 eq., 40.0 mg., 0.113 mmol.) and  $\text{Mn}(\text{dpm})_3$  (1.0 eq. 68.2 mg.). The reaction vessel was evacuated and refilled with nitrogen gas 3x successively and then placed under positive pressure of Argon. Degassed and anhydrous *i*-PrOH ([0.1 M], 1.13 mL) was then added, followed by  $\text{PhSiH}_3$  (1.0 eq., 13.9  $\mu\text{L}$ ). The reaction was stirred for 24 hours. A precipitate formed during the course of the reaction, and this precipitate was filtered off. The filtrate was concentrated *in vacuo* and then purified by FCC on silica with a gradient of 10% EtOAc/hex to 20% EtOAc/hex. The desired product **13** was obtained as a clear pale yellow oil in 78% yield (25 mg.).

#### Characterization data of 8-aryl menthol **13**:

$R_f$  0.55 (20% EtOAc/hex, stains pink in anisaldehyde)

Opt. Rot.  $-19.8^\circ$  ( $c=1.00$  in  $\text{CH}_2\text{Cl}_2$ ,  $24^\circ\text{C}$ )

$^1\text{H}$  NMR (600 MHz,  $\text{CDCl}_3$ )

$^1\text{H}$  NMR (600 MHz, Chloroform-*d*)  $\delta$  8.90 (dd,  $J = 4.1, 1.9$  Hz, 1H), 8.12 (dd,  $J = 8.2, 2.0$  Hz, 1H), 7.68 (td,  $J = 7.8, 1.4$  Hz, 2H), 7.46 (dd,  $J = 8.1, 7.4$  Hz, 1H), 7.36 (dd,  $J = 8.2, 4.1$  Hz, 1H), 3.54 (td,  $J = 10.5, 4.1$  Hz, 1H), 2.97 (ddd,  $J = 13.1, 10.3, 3.4$  Hz, 1H), 2.39 (s, 1H), 1.82 (dtd,  $J = 12.4, 3.9, 2.3$  Hz, 1H), 1.72 (s, 3H), 1.68 (s, 3H), 1.62 (s, 1H), 1.60 – 1.52 (m, 1H), 1.34 (m, 1H), 1.02 – 0.90 (m, 2H), 0.85 (d,  $J = 6.5$  Hz, 3H), 0.90 – 0.79 (m, 1H)

$^{13}\text{C}$  NMR (151 MHz,  $\text{CDCl}_3$ )

$^{13}\text{C}$  NMR (151 MHz,  $\text{CDCl}_3$ )  $\delta$  148.3, 147.5, 147.3, 137.0, 129.5, 127.2, 127.1, 126.2, 120.5, 73.6, 51.4, 45.3, 42.4, 35.2, 31.9, 28.1, 27.8, 27.1, 22.2

ESI-LCMS 284.1 ( $\text{M}+\text{H}$ ) $^+$

### 3.36 **SI-16**: sulfonate precursor to **14**

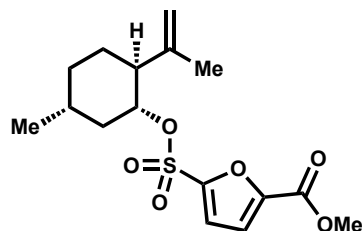

A 5 mL round bottom flask was charged with a stir bar, (–)-isopulegol (0.2 mmol, 34  $\mu$ L) and anhydrous pyridine ([0.67 M], 300  $\mu$ L) and the yellow black oil methyl 5-(chlorosulfonyl)furan-2-carboxylate (2.0 eq., 0.4 mmol, 90 mg.) under an Argon atmosphere at room temperature. The reaction was stirred for 24 hours and the reaction was concentrated directly *in vacuo*, azeotropically removing the pyridine with toluene. The reaction was purified by FCC on silica with toluene as the eluent. The resultant white/yellow gelatinous mass was still impure and so was purified by a second time by FCC with a gradient of 10% Et<sub>2</sub>O/hex to 15% Et<sub>2</sub>O/hex to obtain **SI-16** a viscous oil/white crystalline solid (18% yield, 12.3 mg.), which contained a small aromatic impurity but was taken on into the next reaction (towards **14**).

This reaction was repeated and a pure sample was obtained by prep plate purification with 100% benzene as eluent for the purposes of characterization.

#### Characterization data of sulfonate ester **SI-16**:

$R_f$  0.32 (100% benzene; stains purple in anisaldehyde)

$^1\text{H NMR}$  (600 MHz, CDCl<sub>3</sub>)

$^1\text{H NMR}$  (600 MHz, Chloroform-*d*)  $\delta$  7.19 (d,  $J$  = 3.6 Hz, 1H), 7.09 (d,  $J$  = 3.6 Hz, 1H), 4.72 – 4.57 (m, 3H), 3.94 (s, 3H), 2.26 (dddd,  $J$  = 12.3, 5.0, 3.4, 1.8 Hz, 1H), 2.16 (ddd,  $J$  = 12.6, 10.6, 4.0 Hz, 1H), 1.73 (dq,  $J$  = 13.7, 3.5 Hz, 1H), 1.70 – 1.63 (m, 1H), 1.59 (dd,  $J$  = 1.5, 0.9 Hz, 3H), 1.60 – 1.50 (m, 1H), 1.40 – 1.26 (m, 2H), 0.95 (d,  $J$  = 6.6 Hz, 3H), 1.01 – 0.87 (m, 1H)

$^{13}\text{C NMR}$  (151 MHz, CDCl<sub>3</sub>)

$^{13}\text{C NMR}$  (151 MHz, CDCl<sub>3</sub>)  $\delta$  158.1, 149.0, 147.2, 144.7, 117.9, 117.7, 112.8, 87.1, 52.7, 50.5, 41.9, 33.7, 31.8, 30.6, 22.0, 20.2

ESI-LCMS 365.1 [M+Na]<sup>+</sup>

### 3.37 **14**: 8-(methyl 2-furan-5-carboxylate)menthol

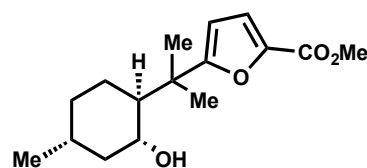

A 5 mL round bottom flask was charged with a stir bar, partially impure aryl sulfonyl **SI-16** (1.0 eq., 12.3 mg, 0.036 mmol) and Mn(dpm)<sub>3</sub> (1.05 eq., 22.8 mg). The reaction vessel was evacuated and refilled with nitrogen

gas 3x on a vacuum manifold and placed under positive pressure of argon. Degassed *i*-PrOH ([0.03 M], 720  $\mu$ L) was then added. Finally, PhSiH<sub>3</sub> (1.05 eq., 4.7  $\mu$ L) was added while stirring. The reaction was stirred for 22 hours, at which point TLC indicated consumption of starting material **SI-16**. The reaction was concentrated directly *in vacuo* and purified by FCC on silica with 25% Et<sub>2</sub>O/hexanes. The resultant compound still contained impurities and so was further purified by prep plate with the same eluent system. The desired compound **14** was obtained as a clear viscous oil in 30% yield (3 mg).

**Characterization data of 8-arylmenthol **14**:**

*R<sub>f</sub>* 0.34 (50% Et<sub>2</sub>O/hex, stains purple in anisaldehyde)

Opt. Rot. Due to lack of material, a reliable measurement could not be obtained. (The methyl 5-(chlorosulfonyl)furan-2-carboxylate compound used to make the precursor **SI-16** is very expensive (\$2.50/mg) and limits preparation of **SI-16**.)

<sup>1</sup>H NMR (600 MHz, CDCl<sub>3</sub>)

<sup>1</sup>H NMR (600 MHz, Chloroform-*d*)  $\delta$  7.08 (d, *J* = 3.5 Hz, 1H), 6.12 (d, *J* = 3.5 Hz, 1H), 3.86 (s, 3H), 3.45 (td, *J* = 10.5, 4.2 Hz, 1H), 1.88 (dtd, *J* = 12.2, 3.8, 2.1 Hz, 1H), 1.81 (ddd, *J* = 12.0, 10.0, 3.4 Hz, 1H), 1.68 – 1.57 (m, 2H), 1.44 – 1.35 (m, 1H), 1.39 (s, 3H), 1.33 (s, 3H), 1.21 – 1.30 (m, 1H), 1.10 – 0.90 (m, 2H), 0.89 (d, *J* = 6.6 Hz, 3H), 0.93 – 0.76 (m, 1H)

<sup>13</sup>C NMR (151 MHz, CDCl<sub>3</sub>)

<sup>13</sup>C NMR (151 MHz, CDCl<sub>3</sub>)  $\delta$  169.8, 159.5, 142.7, 119.3, 105.5, 72.7, 52.0, 51.8, 45.7, 38.5, 34.7, 31.7, 26.4, 26.3, 23.4, 22.1

GC-MS (ESI) Retention time: 9.47 minutes

| m/z   | % Max |
|-------|-------|
| 280.2 | 3.0   |
| 221.2 | 7.16  |
| 168.1 | 18.0  |
| 167.1 | 100   |
| 166.1 | 6.13  |
| 153.1 | 14.0  |
| 135.0 | 4.13  |
| 95.1  | 2.62  |
| 79.1  | 5.30  |
| 77.0  | 3.38  |
| 55.1  | 2.70  |
| 153.1 | 14.0  |
| 135.0 | 4.13  |
| 95.1  | 2.62  |

### 3.38 **SI-17**: sulfonate precursor to **15**

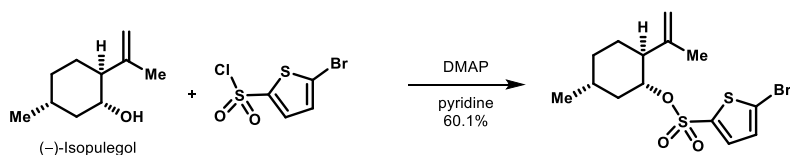

A magnetically stirred vial was charged with a solution of (-)-isopulegol (1.0 mmol, 0.169 mL, 1.0 eq.) in anhydrous pyridine (1 mL) at 22 °C under an atmosphere of air. To this solution was added 5-bromothiophene-2-sulfonyl chloride (1.5 mmol, 392 mg, 1.5 eq., Aldrich) and DMAP (0.2 mmol, 24.4 mg, 0.2 eq). The reaction vessel was capped and allowed to stir for 36 hours. The reaction mixture was then quenched with water (3 mL) and extracted with DCM (10 mL). Collected organics were sequentially washed with 1N HCl (10 mL) followed by water (10 mL), Saturated sodium bicarbonate solution (10 mL), water (10 mL), and finally brine (10 mL). Organics were then dried over Na<sub>2</sub>SO<sub>4</sub> and concentrated *en vacuo*. Residue was then subjected to silica gel chromatography with toluene as eluant and sulfonate ester **SI-17** was obtained as a white solid (228 mg, 60.1%). It should be noted that this compound decomposes into a brown tar upon prolonged storage on the laboratory bench, likely due to instability under light exposure, thus should be stored in the freezer and protected from light.

#### Characterization data of sulfonate ester **SI-17**:

$R_f$  0.68 (100% toluene, anisaldehyde)  
 $^1\text{H NMR}$  (400 MHz, CDCl<sub>3</sub>)  $\delta$  7.40 (dd,  $J$  = 4.0, 0.7 Hz, 1H), 7.06 (dd,  $J$  = 4.0, 0.7 Hz, 1H), 4.70 (s, 2H), 4.51 (td,  $J$  = 10.9, 4.6 Hz, 1H), 2.29 – 2.19 (m, 1H), 2.14 (ddd,  $J$  = 12.7, 10.7, 3.7 Hz, 1H), 1.76 – 1.59 (m, 2H), 1.58 – 1.45 (m, 4H), 1.42 – 1.20 (m, 2H), 1.02 – 0.85 (m, 4H).  
 $^{13}\text{C NMR}$  (101 MHz, CDCl<sub>3</sub>)  $\delta$  144.9, 138.6, 133.8, 130.2, 121.3, 113.2, 85.2, 50.8, 41.8, 33.7, 31.8, 30.5, 22.0, 19.8.  
 $\text{ESI-LCMS}$   $m/z$  = 401.0, 403.2 (M+Na)<sup>+</sup>

### 3.39 **15**: 8-(5-bromothiophen-2-yl)menthol

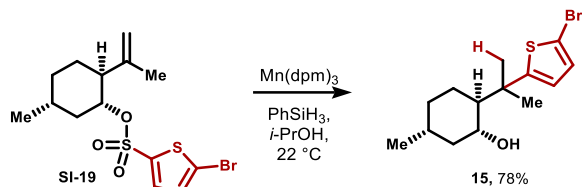

**15** (37 mg, 78%) was prepared according to General Procedure 2.2A with the following adjustments: 1.0 equiv. substrate **SI-17** (0.15 mmol, 57 mg) was treated with 1.0 equiv. Mn(dpm)<sub>3</sub> (0.15 mmol, 91 mg) and 1.08 equiv. phenylsilane (0.162 mmol, 20  $\mu$ L) in *i*-PrOH (2 mL), reaction time = 23 hours.

**Characterization data of 8-aryl-menthol **15**:**

$R_f$  0.35 (20% Et<sub>2</sub>O / Hexanes, bright yellow spot with anisaldehyde stain)

**Opt. Rot.**  $[\alpha]_D^{22} = -0.411^\circ$  (c = 1.540, EtOH)

**<sup>1</sup>H NMR** (400 MHz, CDCl<sub>3</sub>)

$\delta$  6.85 (d,  $J = 3.8$  Hz, 1H), 6.59 (d,  $J = 3.8$  Hz, 1H), 3.63 – 3.36 (m, 1H), 1.88 (ddd,  $J = 12.3$ , 6.1, 3.9 Hz, 1H), 1.73 – 1.58 (m, 2H), 1.51 (ddd,  $J = 13.3$ , 9.9, 3.4 Hz, 1H), 1.46 – 1.32 (m, 7H), 1.31 – 1.18 (m, 1H), 1.07 – 0.92 (m, 2H), 0.91 – 0.79 (m, 4H).

**<sup>13</sup>C NMR** (101 MHz, CDCl<sub>3</sub>)

$\delta$  159.4, 129.2, 122.5, 109.7, 73.1, 55.2, 45.8, 40.6, 34.8, 31.6, 29.7, 27.3, 26.7, 22.1.

**GC-MS (EI)** Retention time: 9.78 minutes.

| m/z   | % Max  |
|-------|--------|
| 204.9 | 100.00 |
| 202.9 | 96.28  |
| 190.9 | 3.55   |
| 188.8 | 3.59   |
| 148.9 | 3.29   |
| 136.0 | 8.81   |
| 124.0 | 18.17  |
| 91.0  | 10.60  |
| 81.9  | 9.74   |
| 67.0  | 7.72   |
| 55.0  | 8.36   |

**3.40 SI-18: sulfonate precursor to **16****

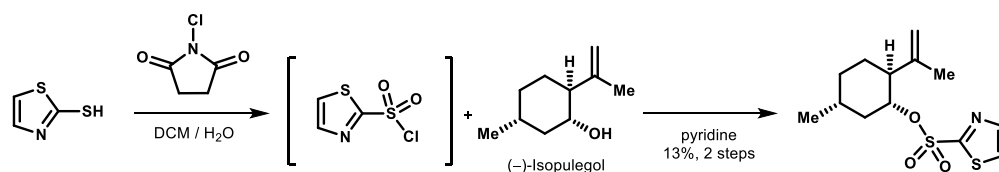

Sulfonyl chloride precursor to **SI-18** was prepared by adapting a reported patent procedure (unoptimized).<sup>10</sup> A 100 mL round bottom flask equipped with a magnetic stir bar was charged with a suspension of 2-mercaptothiazole (5.0 mmol, 586 mg, 1.0 eq.) in a biphasic mixture of water (15 mL) and DCM (15 mL). This flask was submerged in a room temperature water bath and rapidly stirred, and N-chlorosuccinimide (20.0 mmol, 2.67 g, 4.0 eq.) was added in a portion-wise fashion, so as to minimize the rise in temperature. After addition, biphasic mixture was allowed to continue stirring for 30 minutes and then diluted with an additional portion of DCM (25 mL) and partitioned in a reparatory funnel. The organic layer was then washed

[10] Portola Pharmaceuticals, Inc., *Preparation Of Heteroarylsulfonylureas And Related Compounds As Platelet ADP Receptor Antagonists*, 2002, US 20020077486.

sequentially with saturated bicarbonate solution, water, and brine before being dried over a minimal amount of sodium sulfate. Following drying, this solution of crude sulfonyl chloride was concentrated to a minimal volume of DCM and a solution of (-)-isopulegol (2 mmol, 0.338 mL, 0.4 eq. with respect to theoretical maximum of sulfonyl chloride) in anhydrous pyridine (4 mL) was added directly. Resulting solution was allowed to stir 24 hours, then quenched with water (10 mL) and extracted with diethyl ether (3x 15 mL). Combined organics were then washed sequentially with 1M H<sub>2</sub>SO<sub>4</sub>, water, saturated sodium bicarbonate solution, water and brine before being dried over magnesium sulfate. Organics were then removed by rotary evaporation and resulting crude product was chromatographed on silica gel using toluene as the eluting solvent to give the desired sulfonate ester **SI-18** as a beige solid (79 mg, 13% with respect to (-)-isopulegol).

Characterization data of sulfonate ester **SI-18**:

$R_f$  0.33 (100% toluene, anisaldehyde)  
 $^1\text{H NMR}$  (600 MHz, CDCl<sub>3</sub>)  
 $\delta$  7.98 (d,  $J$  = 3.1 Hz, 1H), 7.70 (d,  $J$  = 3.1 Hz, 1H), 4.77 (td,  $J$  = 10.9, 4.6 Hz, 1H), 4.62 (s, 1H), 4.57 (s, 1H), 2.34 – 2.23 (m, 1H), 2.16 (ddd,  $J$  = 12.5, 10.8, 3.9 Hz, 1H), 1.71 (dq,  $J$  = 13.6, 3.5 Hz, 1H), 1.68 – 1.62 (m, 1H), 1.58 – 1.47 (m, 4H), 1.35 (qd,  $J$  = 13.2, 3.6 Hz, 1H), 1.28 (q,  $J$  = 12.1 Hz, 1H), 0.98 – 0.86 (m, 4H).  
 $^{13}\text{C NMR}$  (151 MHz, CDCl<sub>3</sub>)  
 $\delta$  162.4, 144.6, 144.4, 125.8, 113.0, 87.1, 50.7, 41.7, 33.7, 31.7, 30.4, 22.0, 20.0.  
 $\text{ESI-LCMS}$   $m/z$  = 301.8 ( $M + 1$ )<sup>+</sup>

3.41 **16**: 8-(2-thiazolyl)menthol

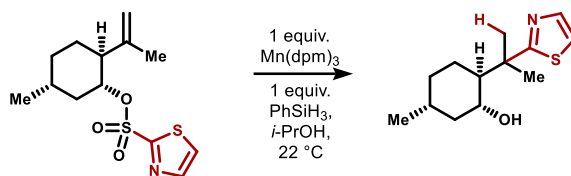

**16** (26.5 mg, 71%) was prepared according to General Procedure 2.2A with the following adjustments: 1.0 equiv. substrate **SI-18** (0.156 mmol, 47 mg) was treated with 1.1 equiv. Mn(dpm)<sub>3</sub> (0.172 mmol, 104 mg) and 2.0 equiv phenylsilane (0.162 mmol, 20  $\mu$ L) in *i*-PrOH (2 mL), reaction time = 23 hours.

Characterization data of 8-aryl-menthol **16**:

$R_f$  0.36 (30% Et<sub>2</sub>O / toluene, anisaldehyde stain)  
 $\text{Opt. Rot.}$   $[\alpha]_D^{25}$  = -31.7° ( $c$  = 0.835, EtOH)  
 $^1\text{H NMR}$  (600 MHz, C<sub>6</sub>D<sub>6</sub>)  $\delta$  7.42 (d,  $J$  = 3.3 Hz, 1H), 6.56 (d,  $J$  = 3.3 Hz, 1H), 3.22 (t,  $J$  = 10.1 Hz, 1H), 2.79 (s, 1H), 1.92 – 1.76 (m, 2H), 1.55 (dq,  $J$  = 13.1, 3.4 Hz, 1H), 1.48 (s, 3H), 1.46 –



1.41 (m, 4H), 1.11 (ddqt,  $J = 16.5, 13.4, 6.5, 3.6$  Hz, 1H), 1.04 – 0.94 (m, 1H), 0.84 (qd,  $J = 13.0, 3.5$  Hz, 1H), 0.78 (d,  $J = 6.5$  Hz, 3H), 0.69 (qd,  $J = 13.0, 3.6$  Hz, 1H).

<sup>13</sup>C NMR (151 MHz, C<sub>6</sub>D<sub>6</sub>)

$\delta$  182.4, 141.9, 117.6, 73.1, 54.0, 45.7, 43.1, 35.1, 31.8, 30.0, 26.8, 26.7, 22.2.

GC-MS (EI) Retention time: 8.30 minutes.

| m/z   | % Max  |
|-------|--------|
| 239.1 | 1.77   |
| 211.2 | 7.13   |
| 154.1 | 6.99   |
| 140.1 | 49.87  |
| 127.1 | 100.00 |
| 112.0 | 32.41  |
| 95.1  | 8.79   |
| 85.9  | 8.36   |
| 58.9  | 11.77  |

### 3.42 **SI-19**: sulfonate precursor to **17**

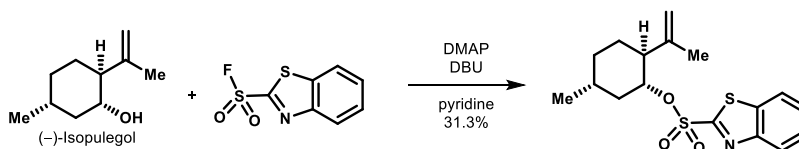

A vial equipped with a magnetic stir bar and a rubber septum was charged with benzothiazole-2-sulfonyl fluoride (1.5 mmol, 326 mg, 1.5 eq., Synthoix) and DMAP (0.2 mmol, 24.4 mg, 0.2 eq), and put under a nitrogen atmosphere. Anhydrous pyridine (1 mL) was then introduced via syringe, followed by (-)-isopulegol (1.0 mmol, 0.169 mL, 1.0 eq.) and the suspension was allowed to stir at 22 °C for 1 hr and 45 mins. At this point, only a small amount of conversion was noted by TLC, so DBU was added (0.151 mL, 1.0 eq.), and the reaction mixture was noted to undergo a mild exotherm and a color change from milky-white to orange-brown. Reaction was allowed to continue stirring at ambient temperature for another 1 hour 10 minutes, at which point it was quenched by pouring into saturated sodium bicarbonate solution (10 mL). Resulting suspension was then extracted twice with DCM (10 mL), and dried over MgSO<sub>4</sub>. Following concentration *en vacuo*, residue was subjected to silica gel chromatography with an 80:20:1 toluene:hexanes:Et<sub>2</sub>O as eluant. Desired product solidified upon removal of eluant volatiles from product-containing fractions, but a minor benzimidazole-type impurity was observed in <sup>1</sup>H NMR spectra. This was easily removed via trituration of product with 5% Et<sub>2</sub>O / Hexanes (2 mL). **SI-19** was thus obtained as a white powder (110 mg, 31.3%).

**Characterization data of sulfonate ester SI-19:**

$R_f$  0.41 (80:20:1 toluene:hexane:Et<sub>2</sub>O, anisaldehyde)

**<sup>1</sup>H NMR** (600 MHz, CDCl<sub>3</sub>)  $\delta$  8.23 (ddd,  $J$  = 8.2, 1.3, 0.7 Hz, 1H), 7.99 (ddd,  $J$  = 8.0, 1.3, 0.7 Hz, 1H), 7.64 (ddd,  $J$  = 8.3, 7.2, 1.3 Hz, 1H), 7.61 – 7.58 (m, 1H), 4.87 (td,  $J$  = 10.9, 4.6 Hz, 1H), 4.62 – 4.58 (m, 1H), 4.39 (p,  $J$  = 1.5 Hz, 1H), 2.35 (dddd,  $J$  = 12.2, 4.9, 3.4, 1.9 Hz, 1H), 2.18 (ddd,  $J$  = 12.6, 10.7, 3.9 Hz, 1H), 1.71 (dq,  $J$  = 13.6, 3.5 Hz, 1H), 1.69 – 1.62 (m, 1H), 1.62 – 1.52 (m, 1H), 1.48 (dd,  $J$  = 1.4, 0.9 Hz, 3H), 1.40 – 1.29 (m, 2H), 0.97 – 0.89 (m, 4H).

**<sup>13</sup>C NMR** (151 MHz, CDCl<sub>3</sub>)  $\delta$  162.6, 152.1, 144.5, 136.9, 128.1, 127.7, 125.6, 122.2, 113.2, 87.7, 50.7, 41.8, 33.7, 31.8, 30.5, 22.0, 20.1.

**ESI-LCMS**  $m/z$  = 374.1 (M+Na)<sup>+</sup>

**3.43 17: 8-(2-benzothiazolyl)menthol**

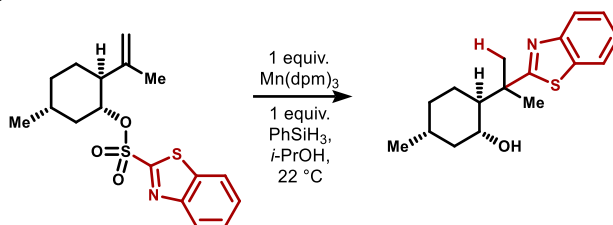

**17** (3.9 mg, 57.1%) was prepared according to General Procedure 2.2A with the following adjustments: 1.0 equiv. substrate **SI-19** (0.024 mmol, 8.3 mg) was treated with 1.0 equiv. Mn(dpm)<sub>3</sub> (14.3 mg) and 1.0 equiv phenylsilane (2.9  $\mu$ L) in *i*-PrOH (1.0 mL), reaction time = 3 hours.

**Characterization data of 8-Aryl-menthol 17:**

$R_f$  0.34 (15% Et<sub>2</sub>O / Toluene, UV visualization)

**Opt. Rot.**  $[\alpha]_D^{22}$  = -9.8° (c = 0.195, EtOH)

**<sup>1</sup>H NMR** (400 MHz, CDCl<sub>3</sub>)  $\delta$  7.95 (d,  $J$  = 8.1 Hz, 1H), 7.84 (d,  $J$  = 7.9 Hz, 1H), 7.49 – 7.39 (m, 1H), 7.37 – 7.29 (m, 1H), 3.46 – 3.36 (m, 1H), 2.51 (d,  $J$  = 6.3 Hz, 1H), 2.01 (ddd,  $J$  = 13.1, 10.1, 3.4 Hz, 1H), 1.94 – 1.81 (m, 2H), 1.74 – 1.63 (m, 1H), 1.57 (s, 3H), 1.52 (s, 3H), 1.41 (dddd,  $J$  = 14.8, 12.9, 6.7, 3.3 Hz, 1H), 1.11 (qd,  $J$  = 13.0, 3.5 Hz, 1H), 1.04 (q,  $J$  = 12.0 Hz, 1H), 0.98 – 0.87 (m, 4H)

**<sup>13</sup>C NMR** (151 MHz, CDCl<sub>3</sub>)  $\delta$  184.2, 152.7, 134.8, 125.9, 124.7, 122.7, 121.6, 73.1, 53.6, 45.3, 43.6, 34.9, 31.8, 29.9, 26.4, 24.9, 22.1

**GC-MS (EI)** Retention time: 10.90 minutes.

| $m/z$ | % Max  |
|-------|--------|
| 289.1 | 1.34   |
| 256.0 | 2.74   |
| 190.0 | 24.07  |
| 177.0 | 100.00 |
| 162.0 | 24.21  |
| 149.0 | 5.76   |

|       |       |
|-------|-------|
| 136.0 | 10.75 |
| 109.0 | 12.46 |
| 95.0  | 7.81  |
| 69.0  | 5.84  |
| 55.1  | 6.78  |

### 3.44 **SI-20**: sulfonate precursor to **18**

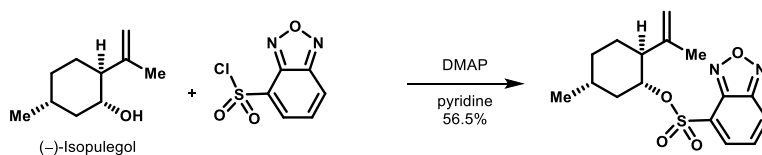

A vial equipped with a magnetic stir bar was charged with 2,1,3-benzoxadiazole-4-sulfonyl chloride (2.0 mmol, 437 mg, 2 eq., Maybridge) and DMAP (0.2 mmol, 24.4 mg, 0.2 eq.). (-)-Isopulegol (1.0 mmol, 0.169 mL, 1.0 eq.) in anhydrous pyridine (1 mL) was then added to the vial, and it was capped. The resulting solution was allowed to stir at room temperature for 48 hours. At this point the reaction mixture was diluted in DCM (10 mL) and washed sequentially with water (10 mL) followed by 1M H<sub>2</sub>SO<sub>4</sub> (30 mL), then saturated sodium bicarbonate solution (10 mL), and finally brine (10 mL). Organics were then dried over MgSO<sub>4</sub> and concentrated *in vacuo*. Residue was then subjected to silica gel chromatography with toluene as eluant and sulfonate ester **SI-20** was obtained as a white solid (190 mg, 56.5%).

#### Characterization data of sulfonate ester **SI-20**:

R<sub>f</sub> 0.32 (100% toluene, anisaldehyde)

<sup>1</sup>H NMR (400 MHz, CDCl<sub>3</sub>) δ 8.14 (d, *J* = 9.1 Hz, 1H), 8.05 (d, *J* = 6.8 Hz, 1H), 7.54 (dd, *J* = 9.1, 6.8 Hz, 1H), 4.69 (td, *J* = 10.8, 4.6 Hz, 1H), 4.36 (s, 1H), 4.19 – 4.02 (m, 1H), 2.41 – 2.21 (m, 1H), 2.21 – 2.02 (m, 1H), 1.71 – 1.59 (m, 2H), 1.59 – 1.47 (m, 1H), 1.40 – 1.21 (m, 5H), 0.98 – 0.84 (m, 4H)

<sup>13</sup>C NMR (101 MHz, CDCl<sub>3</sub>) δ 149.3, 145.0, 144.7, 133.8, 130.0, 127.2, 122.4, 112.5, 86.9, 50.4, 42.2, 33.6, 31.8, 30.7, 21.9, 20.2

ESI-LCMS *m/z* = 359.1 (M+Na)<sup>+</sup>

### 3.45 **18**: 8-(4-benzofurazanyl)menthol

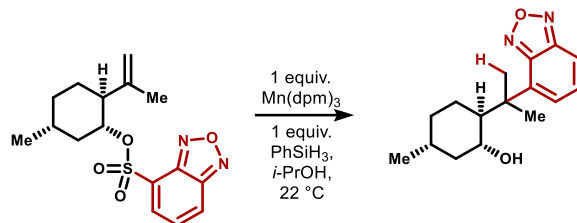

**18** (6 mg, 15%) was prepared according to General Procedure 2.2A with the following adjustments: 1.0 equiv. substrate **SI-20** (0.150 mmol, 50.5 mg) was treated with 1.0 equiv.  $\text{Mn(dpm)}_3$  (0.150 mmol, 91 mg) and 1.0 equiv phenylsilane (0.150 mmol, 18.5  $\mu\text{L}$ ) in *i*-PrOH (1.5 mL), reaction time = 24 hours, purified by silica gel chromatography with first a short column of 40%  $\text{Et}_2\text{O}$  / Hexanes followed by preparative TLC with 20%  $\text{Et}_2\text{O}$  / Toluene.

#### Characterization data of 8-Aryl-menthol **18**:

$R_f$  0.44 (40%  $\text{Et}_2\text{O}$  / Hexanes, Seebach's stain)

Opt. Rot.  $[\alpha]_D^{24} = +9.7^\circ$  ( $c = 0.30$ , EtOH)

$^1\text{H NMR}$   $\delta$  7.63 (dd,  $J = 9.0, 0.7$  Hz, 1H), 7.31 (dd,  $J = 9.0, 6.8$  Hz, 1H), 7.16 – 7.12 (m, 1H), 3.58 (td,  $J = 10.5, 4.2$  Hz, 1H), 2.53 (ddd,  $J = 12.1, 10.1, 3.4$  Hz, 1H), 1.86 (dtd,  $J = 12.2, 3.9, 2.3$  Hz, 1H), 1.61 – 1.50 (m, 6H), 1.48 – 1.37 (m, 4H), 1.05 (qd,  $J = 13.1, 3.5$  Hz, 1H), 0.99 – 0.92 (m, 1H), 0.91 – 0.83 (m, 4H).

$^{13}\text{C NMR}$   $\delta$  150.2, 148.6, 142.8, 131.9, 124.9, 113.7, 73.2, 51.0, 46.0, 41.6, 34.7, 31.9, 26.8, 25.9, 25.1, 22.0.

GC-MS (EI) Retention time: 10.9 minutes.

| m/z   | % Max  |
|-------|--------|
| 274.0 | 3.19   |
| 259.0 | 4.29   |
| 185.0 | 2.61   |
| 175.0 | 3.33   |
| 162.0 | 68.13  |
| 143.1 | 44.27  |
| 130.0 | 60.80  |
| 119.0 | 100.00 |
| 95.1  | 59.51  |
| 67.0  | 22.27  |
| 55.0  | 33.74  |

### 3.46 **SI-21**: diamine product of benzofurazano double-NO bond reduction

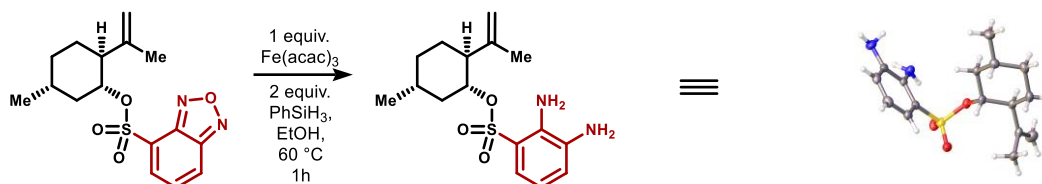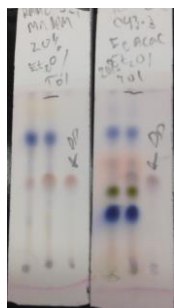

When **SI-20** (39.3mg, 0.117 mmol, 1.0 equiv.) is instead treated with  $\text{Fe}(\text{acac})_3$  (41.3 mg, 0.117 mmol, 1.0 equiv.), and phenylsilane (0.234 mmol, 29  $\mu\text{L}$ , 2.0 equiv) in EtOH (1.17 mL) under an argon atmosphere for 1 hour at 60 °C, product profile is notably different than above manganese conditions, with the major product isolated being **SI-21** (16 mg, 42%) as a clear solid which quickly turns orange on exposure to air. This product was confirmed by X-ray diffraction following crystallization from DCM. Different iterations (controlling for solvent and temperature differences) of this reaction were performed to confirm this was due to the metal selection. See TLC picture (anisaldehyde stain) – left is  $\text{Mn}(\text{dpm})_3$  promoted reaction, right is  $\text{Fe}(\text{acac})_3$  promoted reaction. Both are cospotted (left-most lane) with sample of 8-aryl menthol **18**.

#### Characterization data of diamino-sulfonate **SI-21**:

$R_f$  0.32 (20% Et<sub>2</sub>O / Toluene, blue spot with anisaldehyde stain)

<sup>1</sup>H NMR (600 MHz, CDCl<sub>3</sub>)

$\delta$  7.28 (dd,  $J = 8.1, 1.4$  Hz, 1H), 6.88 (dd,  $J = 7.6, 1.4$  Hz, 1H), 6.68 (t,  $J = 7.9$  Hz, 1H), 4.91 – 4.43 (m, 4H), 4.38 (td,  $J = 10.8, 4.5$  Hz, 1H), 3.45 (bs, 1H), 2.27 – 2.19 (m, 1H), 2.16 – 2.08 (m, 1H), 1.68 – 1.60 (m, 3H), 1.47 (dddd,  $J = 15.4, 12.2, 6.8, 3.4$  Hz, 1H), 1.41 (s, 3H), 1.37 – 1.18 (m, 2H), 0.96 – 0.86 (m, 4H).

<sup>13</sup>C NMR (151 MHz, CDCl<sub>3</sub>)

$\delta = 145.0, 136.4, 135.3, 121.5, 121.3, 120.4, 117.7, 112.9, 83.0, 51.1, 41.8, 33.8, 31.7, 30.6, 22.0, 19.1$ .

ESI-LCMS  $m/z = 324.9$  (M+H)<sup>+</sup>

X-RAY See CCDC 1450888 at the Cambridge Crystallographic Data Center for supplementary crystallographic data.

### 3.47 **SI-22**: 2-methylhex-5-en-3-ol

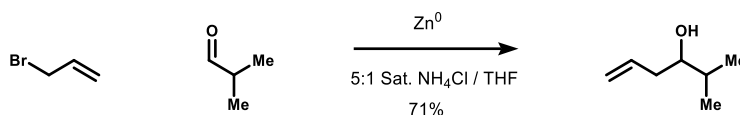

**SI-22** was synthesized by adapting a reported procedure.<sup>11</sup> To a open round-bottom flask equipped with a magnetic stir bar and immersed in a room-temperature water bath was added zinc powder (10.0 mmol, 654 mg, 1 eq.). THF (2 mL) and saturated ammonium chloride solution (10 mL) were then added, followed by freshly-distilled isobutyraldehyde (10 mmol, 0.913 mL, 1.0 eq.) and allyl bromide (20 mmol, 1.73 mL, 2.0 eq.) in quick succession. Upon addition, vigorous stirring was commenced, and heat and gas evolution from the reaction mixture was noted. After 45 minutes of vigorous stirring, all zinc had been consumed and gas and heat evolution have ceased. Reaction mixture is extracted with diethyl ether (3x 25 mL), and dried over  $\text{MnSO}_4$ . Organics were carefully removed by rotary evaporator (caution: product is volatile and allyl bromide remains), and product was purified by silica gel chromatography (20%  $\text{Et}_2\text{O}$  / Pentane). Homoallylic alcohol **SI-22** was thus obtained as a yellow oil (815 mg, 71.4%). All NMR spectra match with previously reported values.<sup>12</sup>

### 3.48 **20a**: 2-methylhex-5-en-3-yl benzenesulfonate

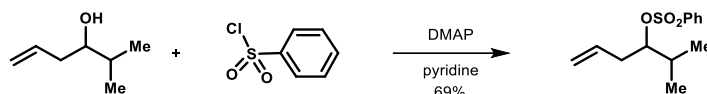

Desired benzene sulfonate **20a** was synthesized according to General Procedure 2.1A with the following modifications: reaction is run at room temperature under air in a tightly capped vial. Substrate **SI-22** (0.5 mmol, 57 mg, 1.0 eq.) was treated with benzenesulfonyl chloride (1 mmol, 129  $\mu\text{L}$ , 2.0 eq.) and catalytic DMAP (8 mg, 13 mol %) in anhydrous pyridine (0.5 mL, 1.0 M) to give homoallylic benzene sulfonate **20a** as a pale yellow oil (88 mg, 69%).

#### Characterization data of homoallylic benzene sulfonate **20a**:

$R_f$  0.37 (10%  $\text{Et}_2\text{O}$  / hexanes, anisaldehyde stain)

$^1\text{H NMR}$  (600 MHz,  $\text{CDCl}_3$ )

$\delta$  7.94 – 7.89 (m, 2H), 7.66 – 7.59 (m, 1H), 7.56 – 7.50 (m, 2H), 5.60 (ddt,  $J = 17.2, 10.2, 7.1$  Hz, 1H), 5.04 – 4.95 (m, 2H), 4.50 – 4.44 (m, 1H), 2.42 – 2.30 (m, 2H), 1.94 (heptd,  $J = 6.8, 5.2$  Hz, 1H), 0.86 (t,  $J = 6.7$  Hz, 6H).

$^{13}\text{C NMR}$  (151 MHz,  $\text{CDCl}_3$ )  $\delta$  137.8, 133.6, 132.7, 129.2, 127.9, 118.5, 88.1, 35.9, 31.04, 18.2, 17.5.

GC-MS (EI) Retention time: 8.18 minutes.

| m/z   | % Max  |
|-------|--------|
| 213.1 | 27.70  |
| 141.0 | 100.00 |
| 96.0  | 11.84  |
| 81.1  | 47.54  |
| 79.1  | 27.20  |
| 77.0  | 87.16  |
| 67.0  | 13.23  |

[11] C. Petrier, J. Luche, *The Journal of Organic Chemistry* 1985, 50, 910-912.

[12] P. Cleary, K. Woerpel, *Org. Lett.* 2005, 7, 5531-5533.

|      |       |
|------|-------|
| 63.9 | 21.67 |
| 55.1 | 23.90 |

### 3.49 **20b**: 2-methyl-5-phenylhexan-3-ol

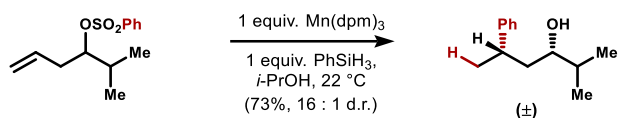

**20b** (29 mg, 73%) was prepared according to General Procedure 2.2A with the following adjustments: 1.0 equiv. substrate **20a** (0.204 mmol, 25.4 mg) was treated with 1.0 equiv.  $\text{Mn(dpm)}_3$  (0.204 mmol, 124 mg) and 1.0 equiv phenylsilane (0.204 mmol, 25  $\mu\text{L}$ ) in *i*-PrOH (2.0 mL), reaction time = 5 hours. Diastereomeric ratio was observed to be 16:1 by GC-FID, and product was isolated as a diastereomeric mixture. NMR Spectra were found to be identical to those previously reported,<sup>13</sup> and diastereomeric configuration was assigned accordingly.

#### Characterization data of alcohol **20b**:

$R_f$  0.32 (50:40:10 Hexanes : Toluene :  $\text{Et}_2\text{O}$ , Seebach's stain)

**$^1\text{H}$  NMR** (400 MHz,  $\text{CDCl}_3$ )  $\delta$  7.31 (t,  $J = 7.7$  Hz, 2H), 7.27 – 7.17 (m, 3H), 3.55 – 3.41 (m, 1H), 2.93 (h,  $J = 7.0$  Hz, 1H), 1.74 – 1.63 (m, 3H), 1.28 (d,  $J = 6.9$  Hz, 3H), 1.17 (d,  $J = 4.9$  Hz, 1H), 0.91 (d,  $J = 6.8$  Hz, 6H).

**$^{13}\text{C}$  NMR** (101 MHz,  $\text{CDCl}_3$ )  $\delta$  148.0, 128.7, 127.0, 126.2, 74.9, 43.2, 36.9, 33.9, 21.6, 18.9, 17.1.

**GC-MS (EI)** Retention time: 6.35 minutes.

| m/z   | % Max  |
|-------|--------|
| 192.1 | 0.13   |
| 190.0 | 0.66   |
| 174.1 | 8.60   |
| 159.1 | 8.77   |
| 131.1 | 21.38  |
| 118.1 | 25.50  |
| 105.1 | 100.00 |
| 91.1  | 19.47  |
| 79.1  | 10.45  |
| 77.1  | 14.44  |
| 51.0  | 4.81   |

[13] M. Bossart, R. Fässler, J. Schoenberger, A. Studer, *Eur. J. Org. Chem.* **2002**, 2002, 2742-2757.

### 3.50 **21a**: 2-vinylcyclohexyl benzenesulfonate

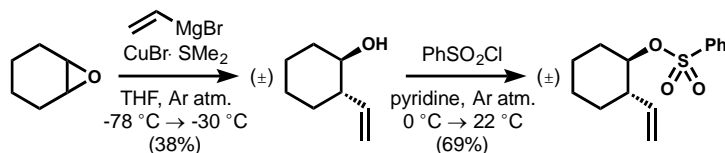

Compound **21a** was prepared in two steps from cyclohexene oxide following a modified literature procedure.<sup>14</sup> A 25 mL round bottom flask was charged with a stir bar,  $\text{CuBr}\cdot\text{SMe}_2$  (506  $\mu\text{L}$ , 0.5 mmol, 0.1 eq.), and anhydrous THF (5.0 mL, [0.1 M] wrt to cyclohexene oxide) under an Argon atmosphere. This suspension was then cooled to ca.  $-78\text{ }^\circ\text{C}$  using a CryoCool cooler and vinyl  $\text{MgBr}$  (6.5 mL, 1.3 eq. of a 1.0 M solution in THF) was added to the stirring solution. This mixture was allowed to stir at  $-78\text{ }^\circ\text{C}$  for 30 minutes, at which time cyclohexene oxide was added slowly, but not dropwise. The reaction was warmed to  $-30\text{ }^\circ\text{C}$  during the course of the next 1.5 hrs. TLC analysis indicated consumption of cyclohexene oxide after 1.25 hrs, so the reaction was quenched with  $\text{NH}_4\text{Cl}$  (saturated, aq.,  $\sim 5\text{ mL}$ ) and warmed to room temperature. This mixture was extracted with  $\text{Et}_2\text{O}$  (3x  $\sim 5\text{ mL}$ ). The organics were combined, dried over  $\text{Na}_2\text{SO}_4$ , filtered off and concentrated *in vacuo*. The resulting crude residue was purified on silica gel in a 10%  $\text{EtOAc}$ /hexanes solvent system to obtain 242 mg. (38% yield) of the desired trans vinyl cyclohexanol (shown above) as a clear pale yellow oil. NMR data matched reported.<sup>15</sup>

Next, a 10 mL round bottom flask was charged with a stir bar, trans vinyl cyclohexanol (from above) (100 mg, 1.0 eq., 0.78 mmol.) and anhydrous pyridine. The reaction was cooled to  $0\text{ }^\circ\text{C}$  in ice bath.  $\text{PhSO}_2\text{Cl}$  (152  $\mu\text{L}$ , 1.19 mmol, 1.5 eq.) was added and the reaction was warmed to ambient temperature ( $22\text{ }^\circ\text{C}$ ). The reaction was stirred for 20 hours, at which point the reaction was quenched with  $\text{NH}_4\text{Cl}$  ( $\sim 1\text{ mL}$ , aq., sat'd) and extracted with  $\text{Et}_2\text{O}$  (3x  $\sim 2\text{ mL}$ ). The organic layer was washed with brine ( $\sim 1\text{ mL}$ ) and then dried over  $\text{Na}_2\text{SO}_4$ , filtered and concentrated *in vacuo*. The crude residue was purified on silica gel with a 7.5%  $\text{EtOAc}$ /hexanes solvent system to obtain 146 mg. (69% yield) of the desired compound **21a** as a flaky white/yellow tinged solid.

#### Characterization data of sulfonate ester **21a**:

$R_f$  0.30 (10%  $\text{EtOAc}$ /hex, anisaldehyde)

$^1\text{H NMR}$  (600 MHz,  $\text{CDCl}_3$ )

$^1\text{H NMR}$  (600 MHz, Chloroform- $d$ )  $\delta$  7.93 – 7.87 (m, 2H), 7.65 – 7.60 (m, 1H), 7.56 – 7.48 (m, 2H), 5.40 (ddd,  $J = 17.2, 10.3, 7.8\text{ Hz}$ , 1H), 4.96 (dt,  $J = 17.2, 1.4\text{ Hz}$ , 1H), 4.84 (ddd,  $J = 10.3, 1.6, 0.7\text{ Hz}$ , 1H), 4.28 (td,  $J = 10.2, 4.4\text{ Hz}$ , 1H), 2.22 – 2.13 (m, 1H), 2.13 – 2.05 (m, 1H), 1.81 – 1.72 (m, 2H), 1.67 – 1.50 (m, 1H), 1.51 (tdd,  $J = 12.6, 10.6, 3.9\text{ Hz}$ , 1H), 1.32 – 1.24 (m, 1H), 1.21 (m, 2H)

$^{13}\text{C NMR}$  (151 MHz,  $\text{CDCl}_3$ )

$^{13}\text{C NMR}$  (151 MHz,  $\text{CDCl}_3$ )  $\delta$  138.9, 137.7, 133.5, 129.1, 128.0, 116.2, 85.4, 47.2, 32.7, 31.2, 24.4 (2xC)

GC-MS (EI) Retention time: 9.44 minutes

[14] Yang, X.; Toste, D.F. *J. Am. Chem. Soc.* **2015**, 137(9), 3205-3208.

[15] Jacolot, M.; Jean, M.; Levoine, N.; van Weghe, P. *Org. Lett.* **2012**, 14(1), 58-61, SI pg 7 and references therein.



| m/z   | % Max |
|-------|-------|
| 266.4 | -     |
| 108.1 | 58.4  |
| 93.1  | 64.1  |
| 91.1  | 19.4  |
| 91    | 21.0  |
| 81.1  | 14.6  |
| 80.1  | 38.2  |
| 79.1  | 100   |
| 78    | 24.1  |
| 77    | 65.0  |
| 67.1  | 29.4  |
| 66.1  | 10.2  |
| 65.1  | 14.3  |
| 55.1  | 16.7  |
| 54.1  | 11.8  |
| 53.1  | 10.4  |
| 51    | 16.9  |

### 3.51 **21b**: (1*R*,2*S*)-2-((*S*)-1-phenylethyl)cyclohexan-1-ol

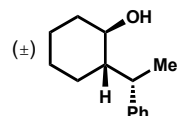

A 5 mL round bottom flask was charged with a stir bar, **21a** (20.0 mg., 0.075 mmol, 1.0 eq.), and Mn(dpm)<sub>3</sub> (1.01 eq., 46 mg.). The reaction vessel was evacuated and refilled with nitrogen gas 3x on a vacuum manifold, then placed under positive pressure of Argon. Degassed *i*-PrOH [0.1 M, 750 μM] was added, followed by PhSiH<sub>3</sub> (1.01 eq., 9.3 μL) and the reaction was stirred at room temperature. The reaction was complete after 1.25 hrs (via TLC and GCMS), so the reaction was quenched by addition of ~1 mL of aq. NH<sub>4</sub>OH (aq., sat'd.), extracted with EtOAc (3x 1mL), dried over Na<sub>2</sub>SO<sub>4</sub>, filtered and concentrated *in vacuo*. The resulting residue was purified by FCC on silica with 8% EtOAc/hex to obtain the desired product **21b** as a clear, pale yellow oil in 75% yield (11.5 mg.). The other possible diastereomer was not observed in the <sup>1</sup>H spectrum or by GC/MS, therefore we consider the diastereoselectivity for this reaction to be ≥20:1.

**Characterization data of alcohol 21b:**

R<sub>f</sub> 0.26 (25% Et<sub>2</sub>O/hex, stains purple in anisaldehyde)

<sup>1</sup>H NMR (600 MHz, CDCl<sub>3</sub>)

<sup>1</sup>H NMR (600 MHz, Chloroform-*d*) δ 7.33 – 7.28 (m, 2H), 7.26 – 7.23 (m, 2H), 7.19 – 7.17 (m, 1H), 3.47 (td, *J* = 9.6, 4.5 Hz, 1H), 3.33 (qd, *J* = 7.2, 4.1 Hz, 1H), 2.03 – 1.94 (m, 1H), 1.73 – 1.67 (m, 1H), 1.62 – 1.54 (m, 1H), 1.54 – 1.44 (m, 2H), 1.25 (d, *J* = 7.2 Hz, 3H), 1.30 – 1.20 (m, 3H), 1.12 – 0.99 (m, 2H)

<sup>13</sup>C NMR (151 MHz, CDCl<sub>3</sub>)

<sup>13</sup>C NMR (151 MHz, CDCl<sub>3</sub>) δ 146.5, 128.3, 128.0, 125.9, 72.4, 51.6, 38.5, 36.1, 25.6, 25.0, 24.7, 14.0

GC-MS (EI) Retention time: 7.32 minutes

| m/z   | % Max |
|-------|-------|
| 204.2 | 0.11  |
| 186.1 | 26.03 |
| 171.1 | 11.62 |
| 143.1 | 14.03 |
| 129.1 | 22.06 |
| 128.1 | 13.42 |
| 118.1 | 20.2  |
| 117.1 | 12.23 |
| 115.1 | 15.73 |
| 106.1 | 34.26 |
| 104   | 16.36 |
| 103   | 14.66 |
| 91.1  | 38.49 |
| 81.1  | 16.43 |
| 80.1  | 10.09 |
| 79.1  | 20.07 |
| 78    | 12.33 |
| 77    | 23.26 |

### 3.52 **SI-23:** ( $\pm$ )-(1*R*,2*S*)-2-((*S*)-1-phenylethyl)cyclohexyl 3,5-dinitrobenzoate

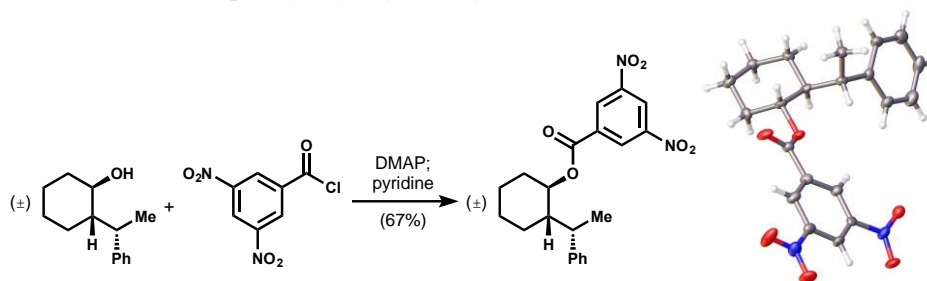

Crystalline compound **SI-23** was prepared from **21b** via the following procedure.<sup>16</sup> A 5 mL round bottom flask was charged with a stir bar, alcohol **21b** (1.0 eq., 10 mg., 0.049 mmol), CH<sub>2</sub>Cl<sub>2</sub> ([0.075 M], 650  $\mu$ L), DMAP (5.0 eq., 30 mg.) and 3,5-dinitrobenzoyl chloride (3 eq., 34 mg.) at room temperature. The stirring solution immediately turned red and a white precipitate formed upon addition of 3,5-dinitrobenzoyl chloride. After 15 minutes, the reaction was quenched by addition of CuSO<sub>4</sub> (~1 mL) and the aqueous layer was extracted with CH<sub>2</sub>Cl<sub>2</sub> (4x 1mL). The organic layer was dried over Na<sub>2</sub>SO<sub>4</sub>, filtered and concentrated. The resulting residue was flushed through a silica plug with 10% Et<sub>2</sub>O/hexanes (20 mL) and concentrated *in vacuo* to obtain the desired product **SI-23** as a pale yellow oil (13 mg., 69% yield). X-ray quality crystals were grown from hot hexanes by slow evaporation.

#### Characterization data of sulfonate ester **SI-23:**

$R_f$  0.21 (5% Et<sub>2</sub>O/hex, stains purple in anisaldehyde)

**<sup>1</sup>H NMR** (600 MHz, CDCl<sub>3</sub>)

<sup>1</sup>H NMR (600 MHz, Chloroform-*d*)  $\delta$  9.16 (q,  $J$  = 1.9 Hz, 1H), 8.90 (t,  $J$  = 1.7 Hz, 2H), 7.18 – 7.10 (m, 4H), 6.89 (td,  $J$  = 7.1, 1.6 Hz, 1H), 5.07 (td,  $J$  = 10.0, 4.4 Hz, 1H), 2.87 (p,  $J$  = 7.0 Hz, 1H), 2.10 – 2.02 (m, 2H), 1.91 – 1.85 (m, 1H), 1.85 – 1.79 (m, 1H), 1.75 (q,  $J$  = 4.2 Hz, 1H), 1.54 – 1.38 (m, 2H), 1.30 – 1.23 (m, 2H), 1.21 (dd,  $J$  = 7.1, 1.2 Hz, 3H)

**<sup>13</sup>C NMR** (151 MHz, CDCl<sub>3</sub>)

<sup>13</sup>C NMR (151 MHz, CDCl<sub>3</sub>)  $\delta$  161.9, 148.5, 146.9, 134.2, 129.4, 128.4, 127.4, 125.6, 122.2, 78.9, 47.5, 41.2, 32.2, 26.5, 25.1, 24.5, 17.2

**ESI-LCMS** 399.2 [M+H]<sup>+</sup>

**X-RAY** See CCDC 1451757 at the Cambridge Crystallographic Data Center for supplementary crystallographic data.

[16] McKerrall, S. J.; Jorgensen, L.; Kuttruff, C. A.; Ungeheuer, F.; Felding, J.; Baran, P. S. *J. Am. Chem. Soc.*, **2014**, *136*(15), 5799-5810. SI-12

## 4. NMR Spectra

### (-)-1: 8-phenylmenthol <sup>1</sup>H-NMR

SCNMR153202.1.fid  
H-1 Routine, CP-DCH, AVIII HD-600

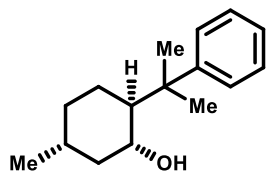

— 7.26 CDCl<sub>3</sub>

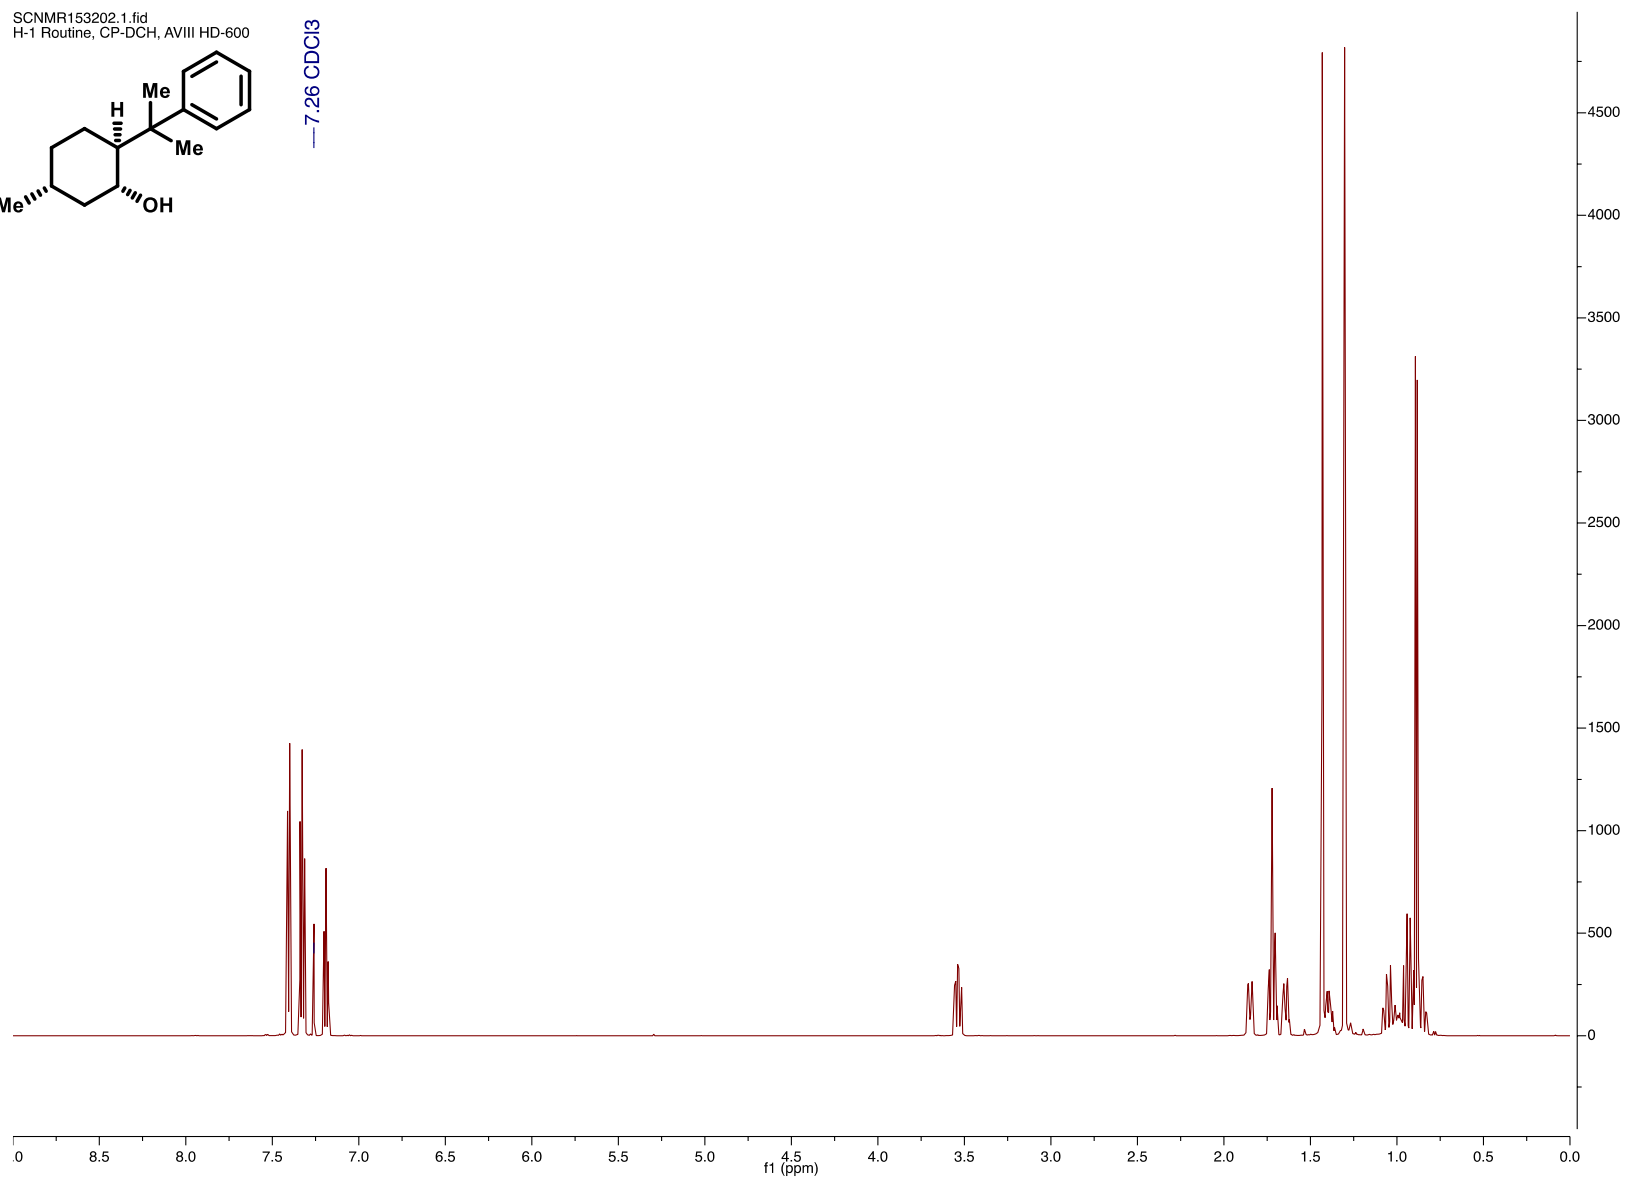

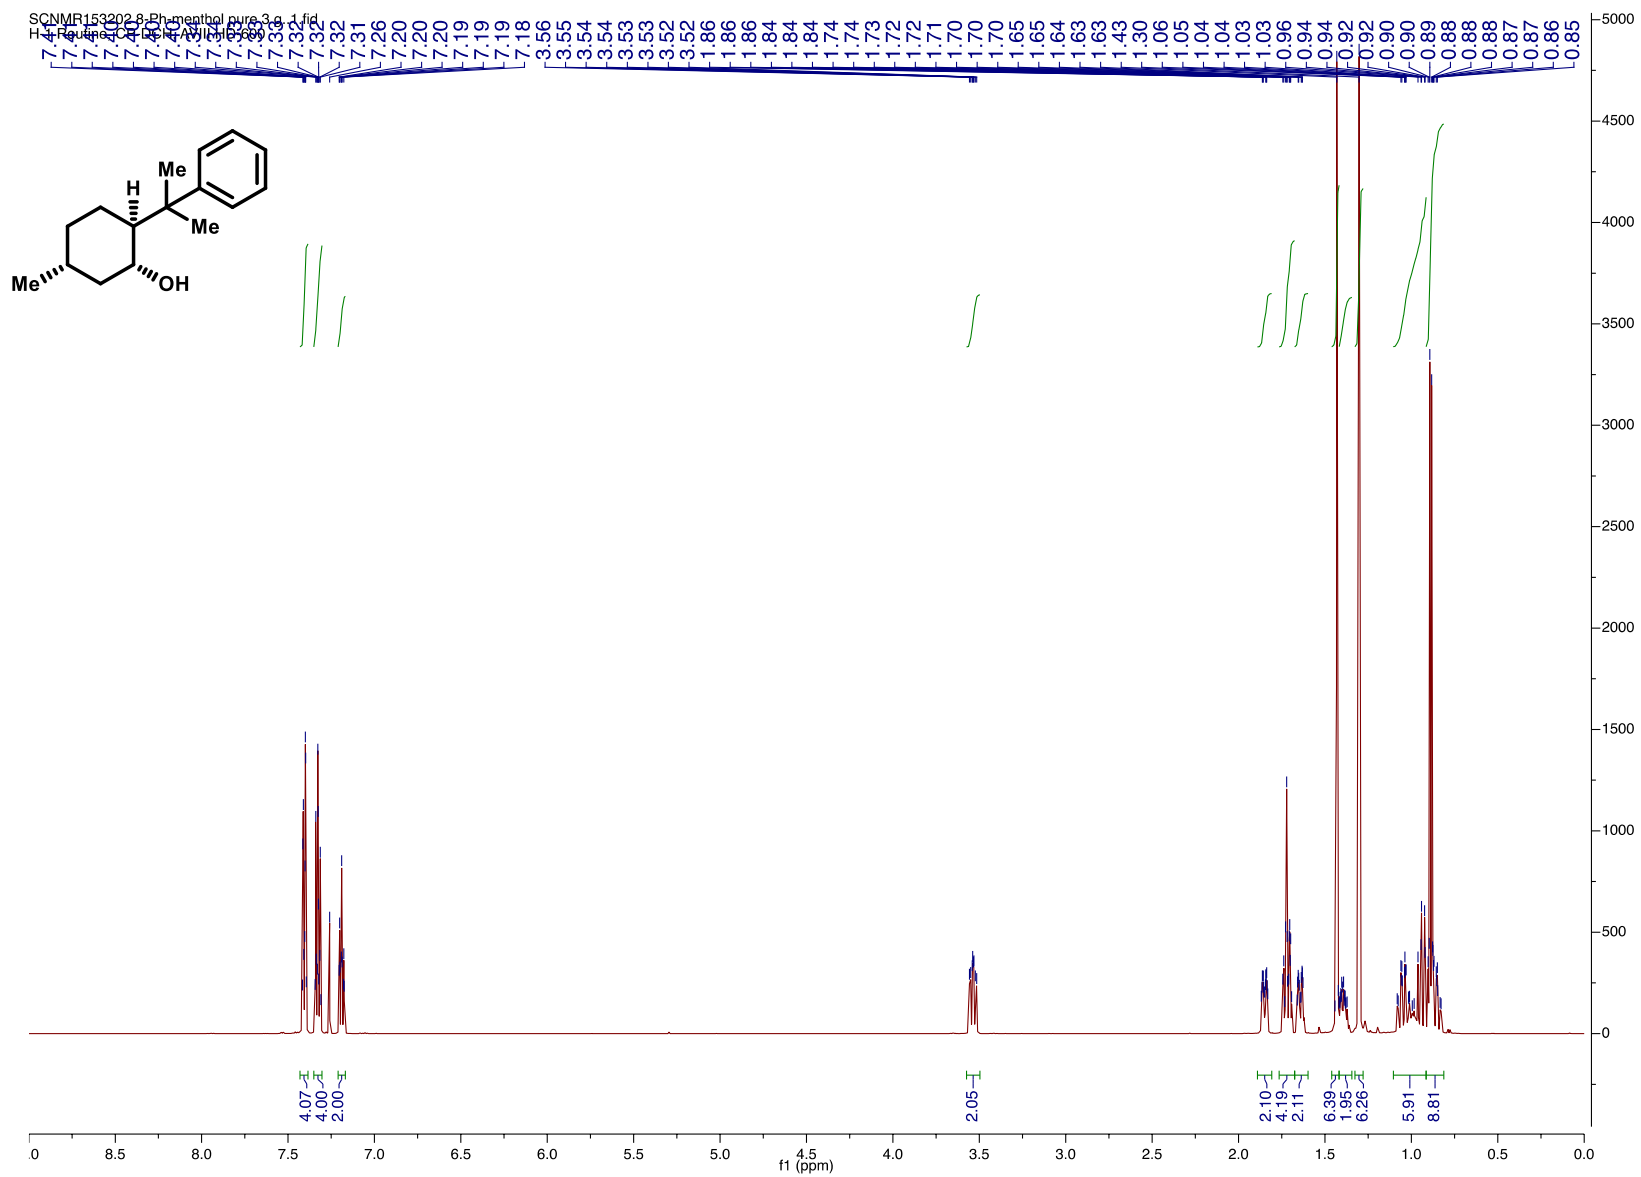

(-)-1: 8-phenylmenthol  $^{13}\text{C}$ -NMR

SCNMR153202.3.fid  
C-13 Routine 1D, CPDCH CryoProbe, AVIII-600

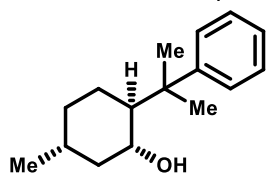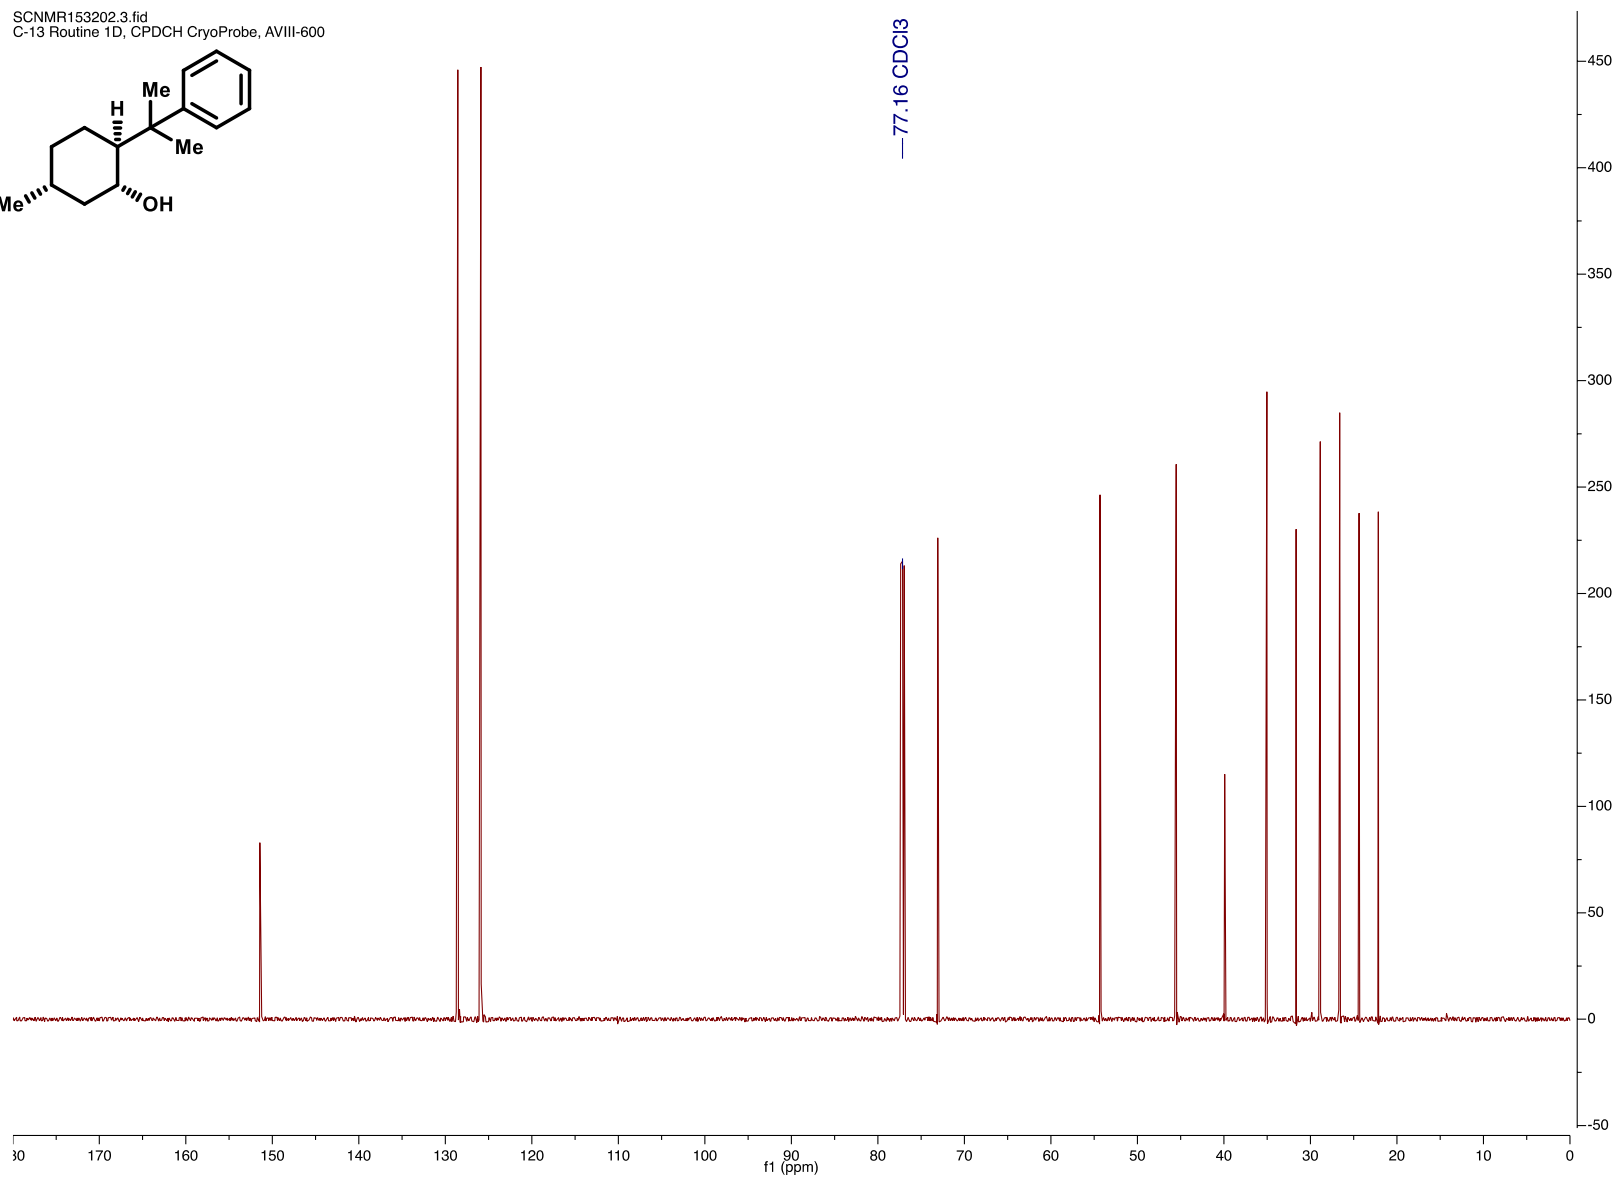

SCNMR153202 8-Ph-menthol pure 3 g.,3.fid  
C-13 Routine 1D, CPDCH CryoProbe, AVIII-600

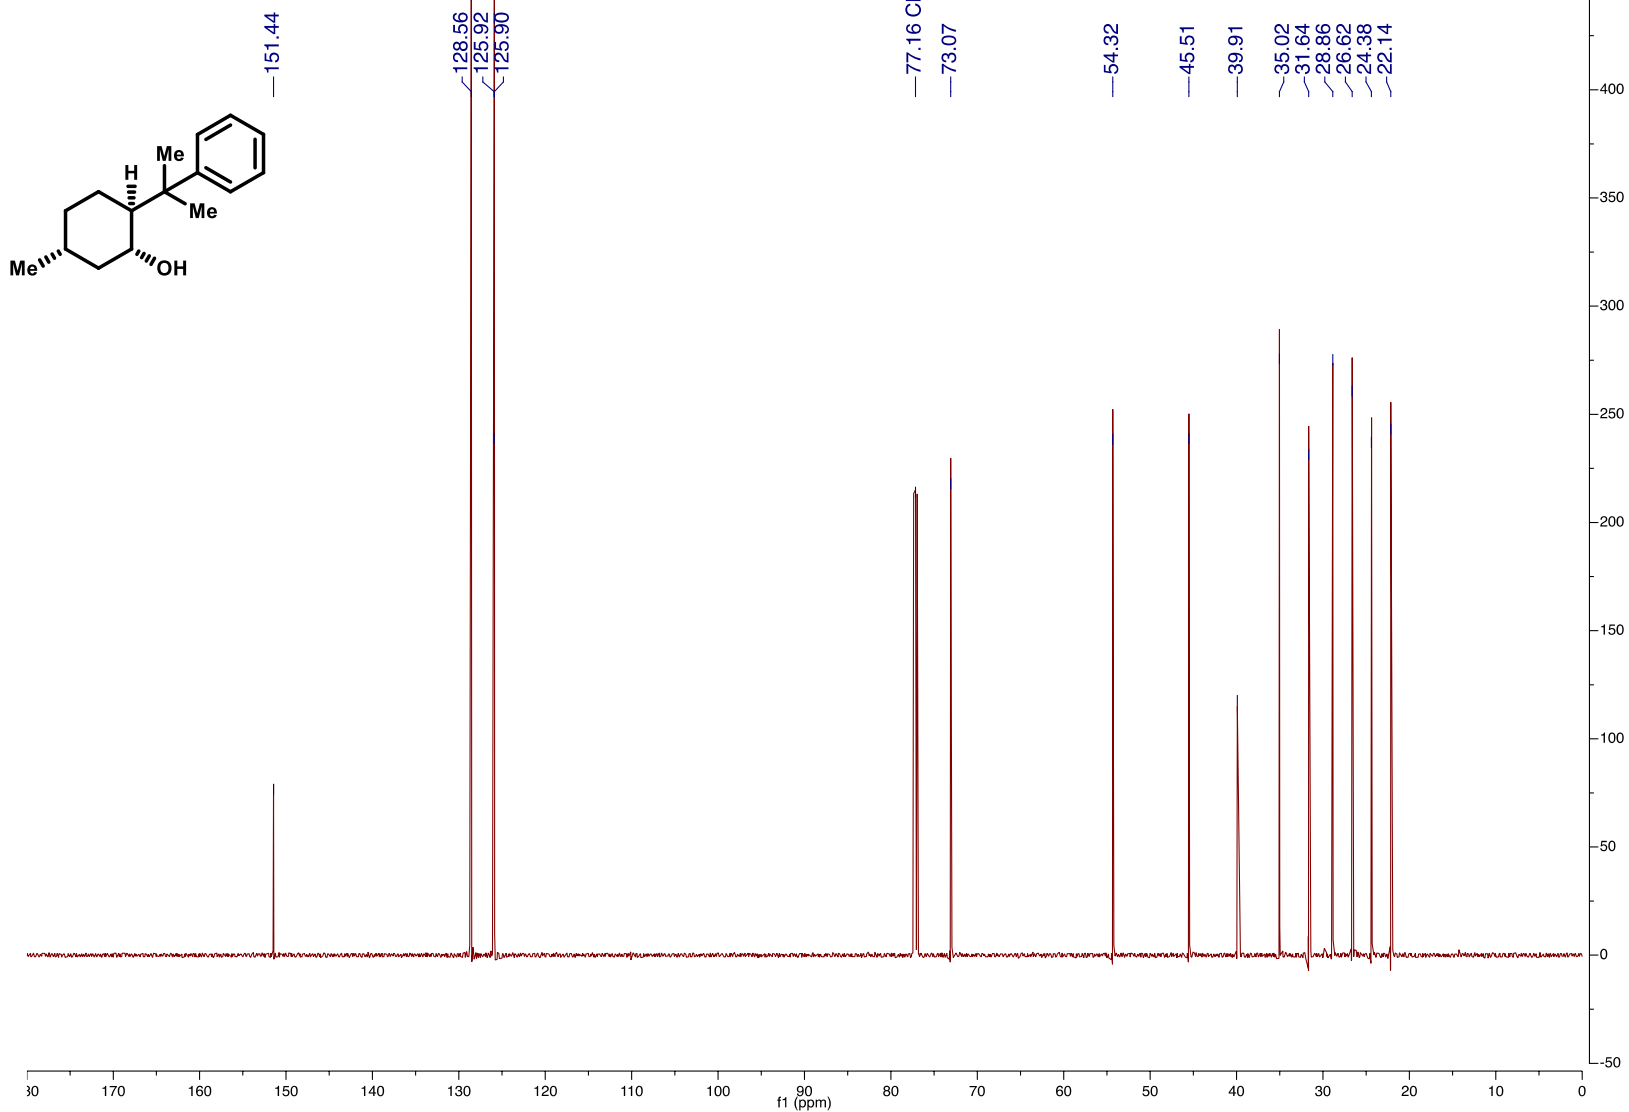

(-)-1: 8-phenylmenthol  $^{13}\text{C}$ -DEPT-Q

SCNMR153202.2.fid  
C-13 DEPTQ (APT) 1D, CPDCH CryoProbe, AVIII-600

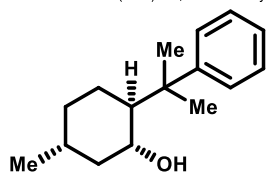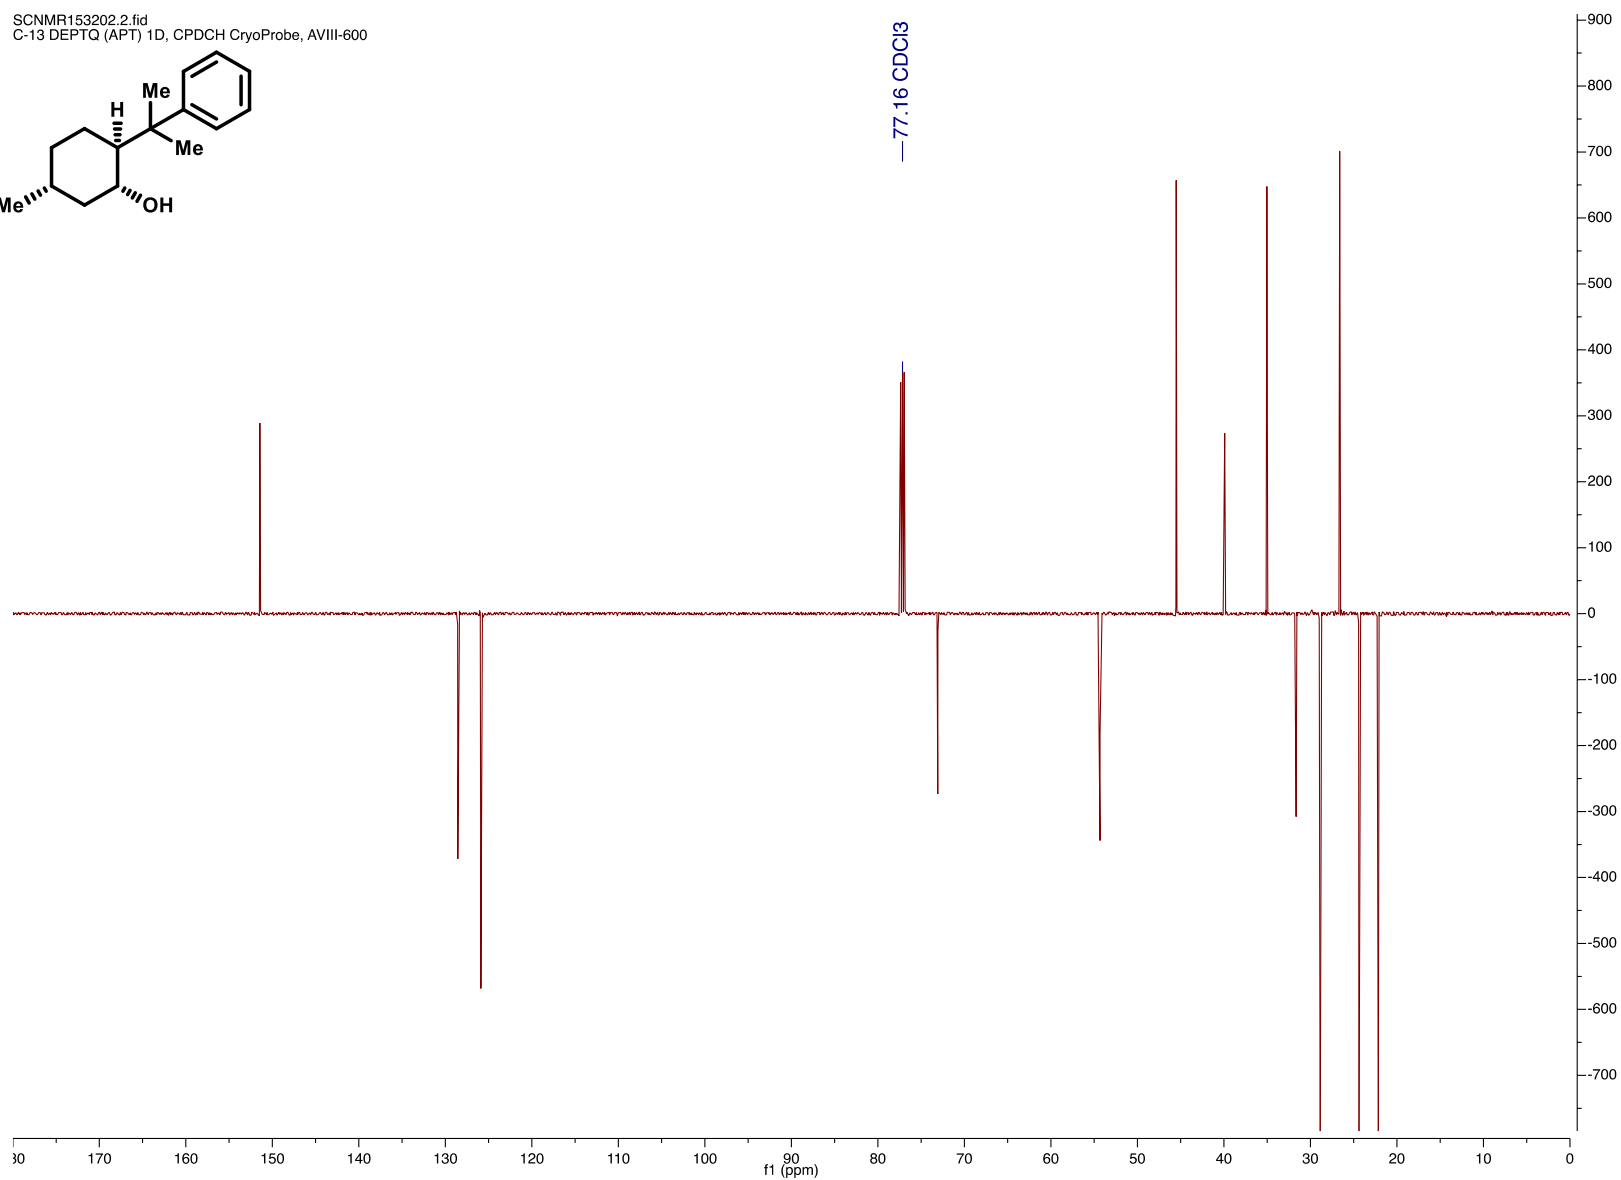



SCNMR153202 8-Ph-menthol pure 3 g..2.fid  
C-13 DEPTQ (APT) 1D, CPDCH CryoProbe, AVIII-600

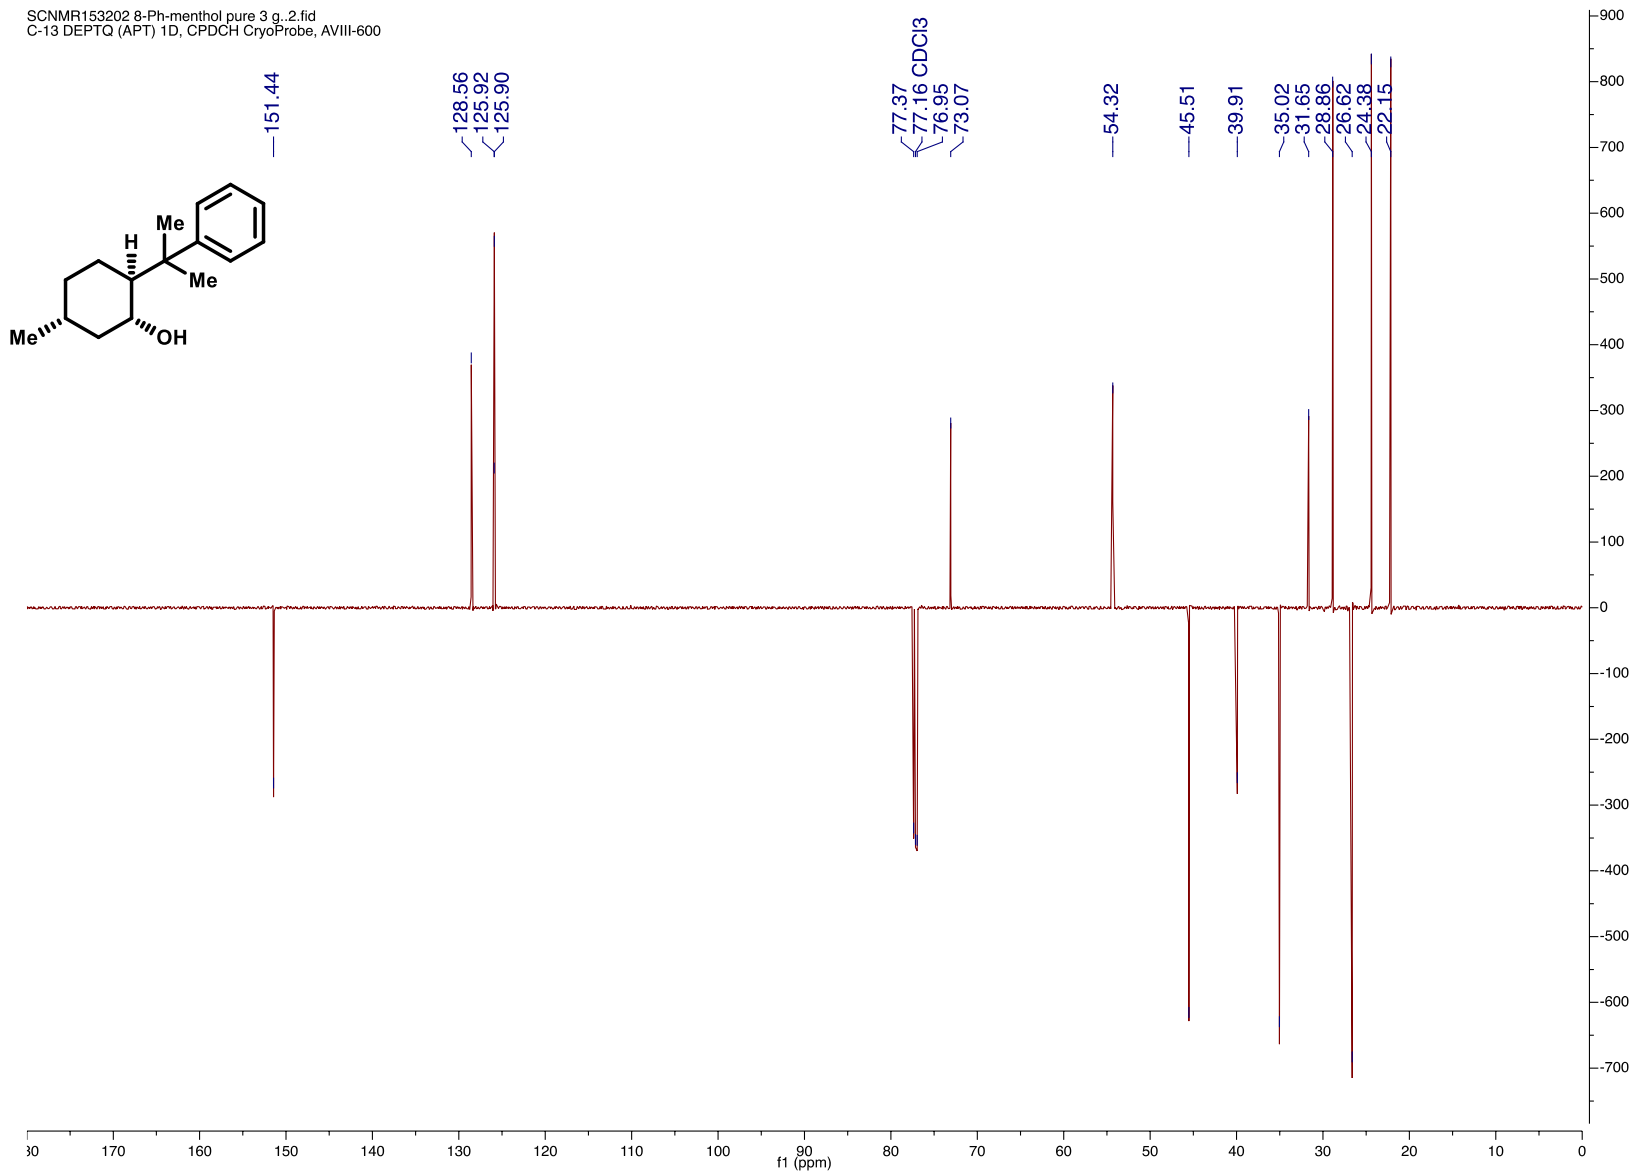

### $^1\text{H}$ -NMR

SCNMR147501 pure sm.1.fid

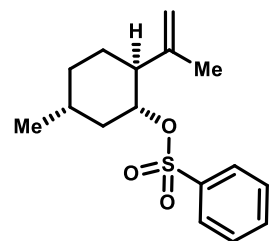

— 7.26 CDCl<sub>3</sub>

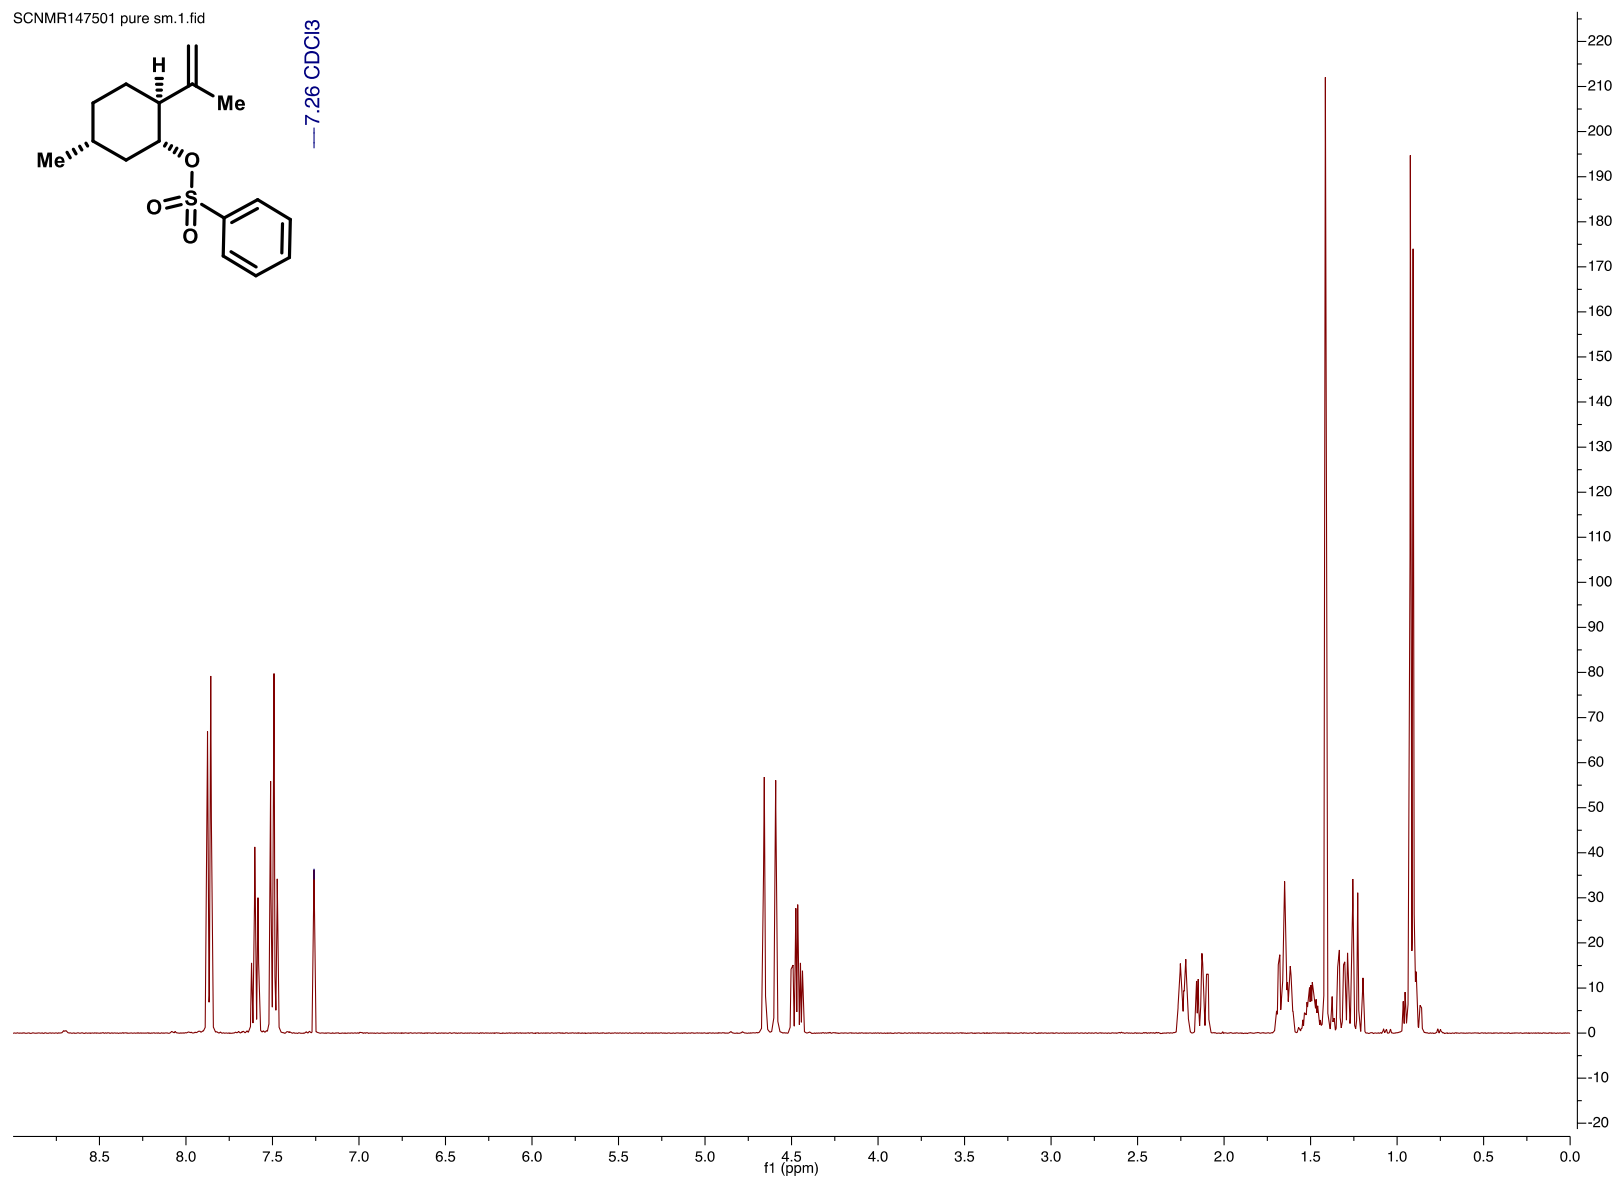

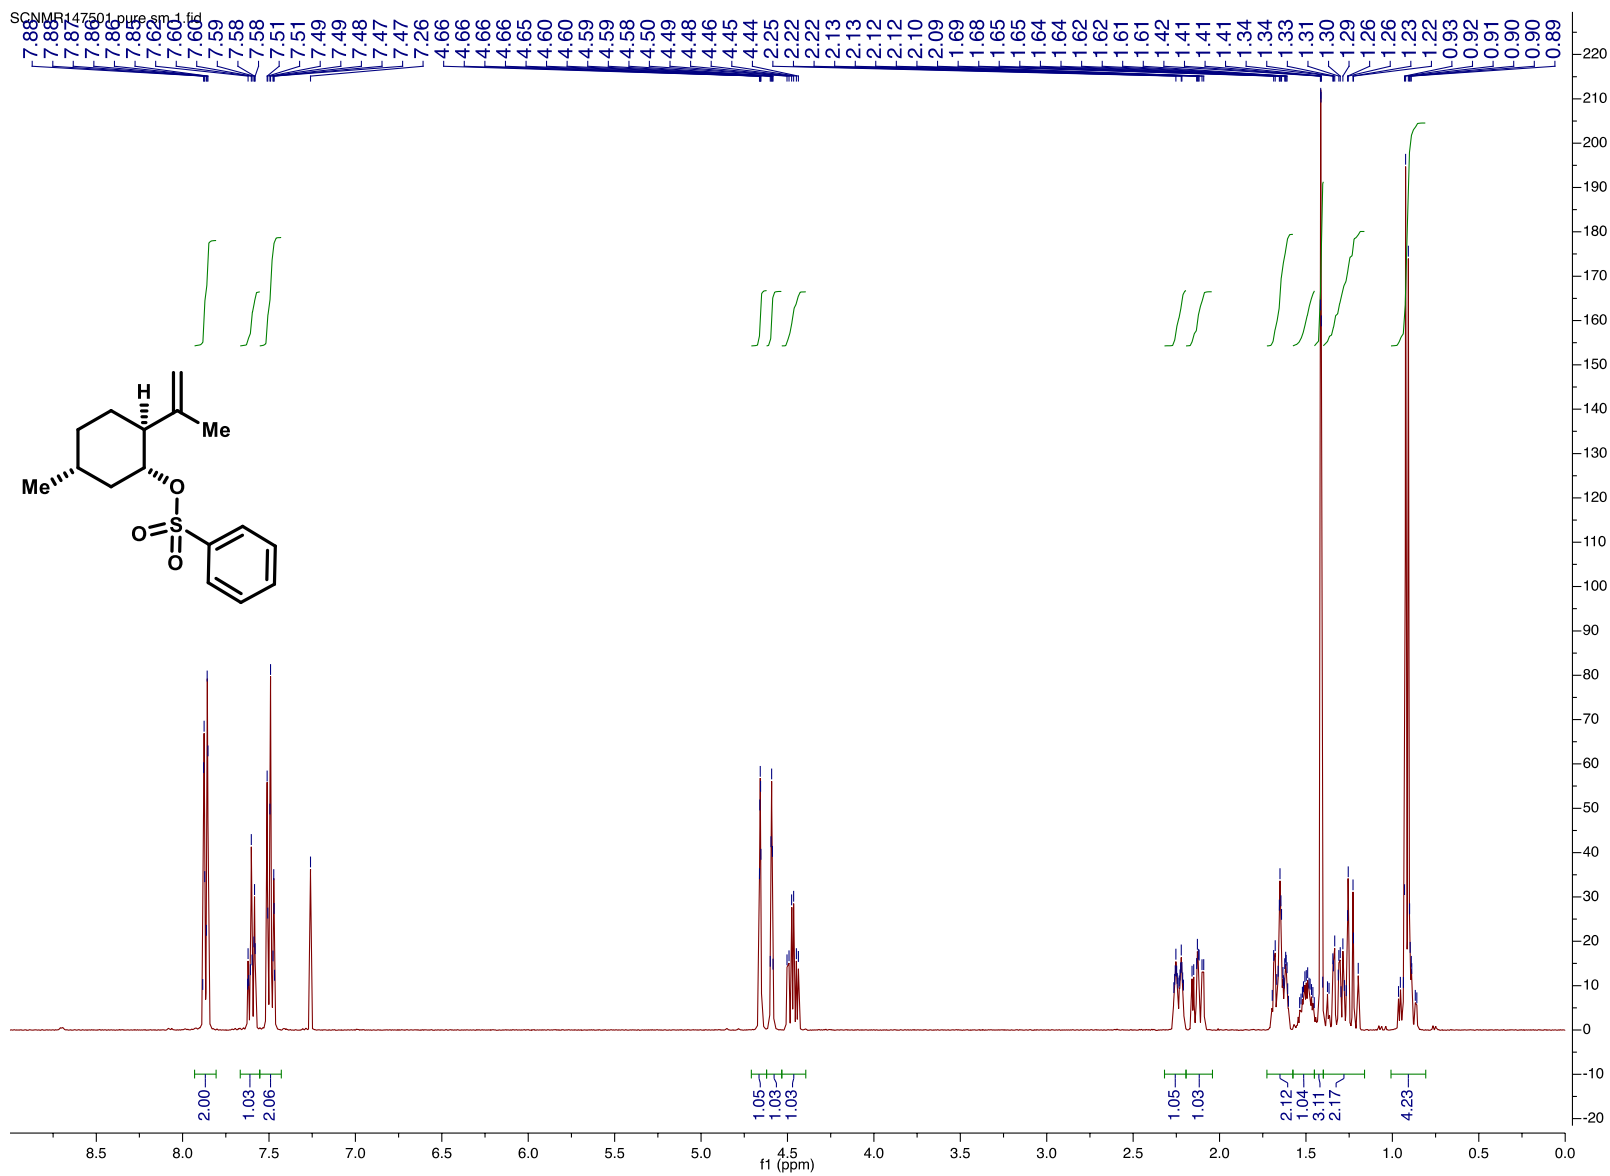

### 3 <sup>13</sup>C-NMR

SCNMR147501 pure sm.2.fid  
C-13 Routine, using 45 degree flip angle. DPX-400

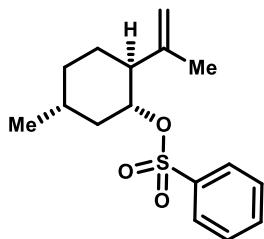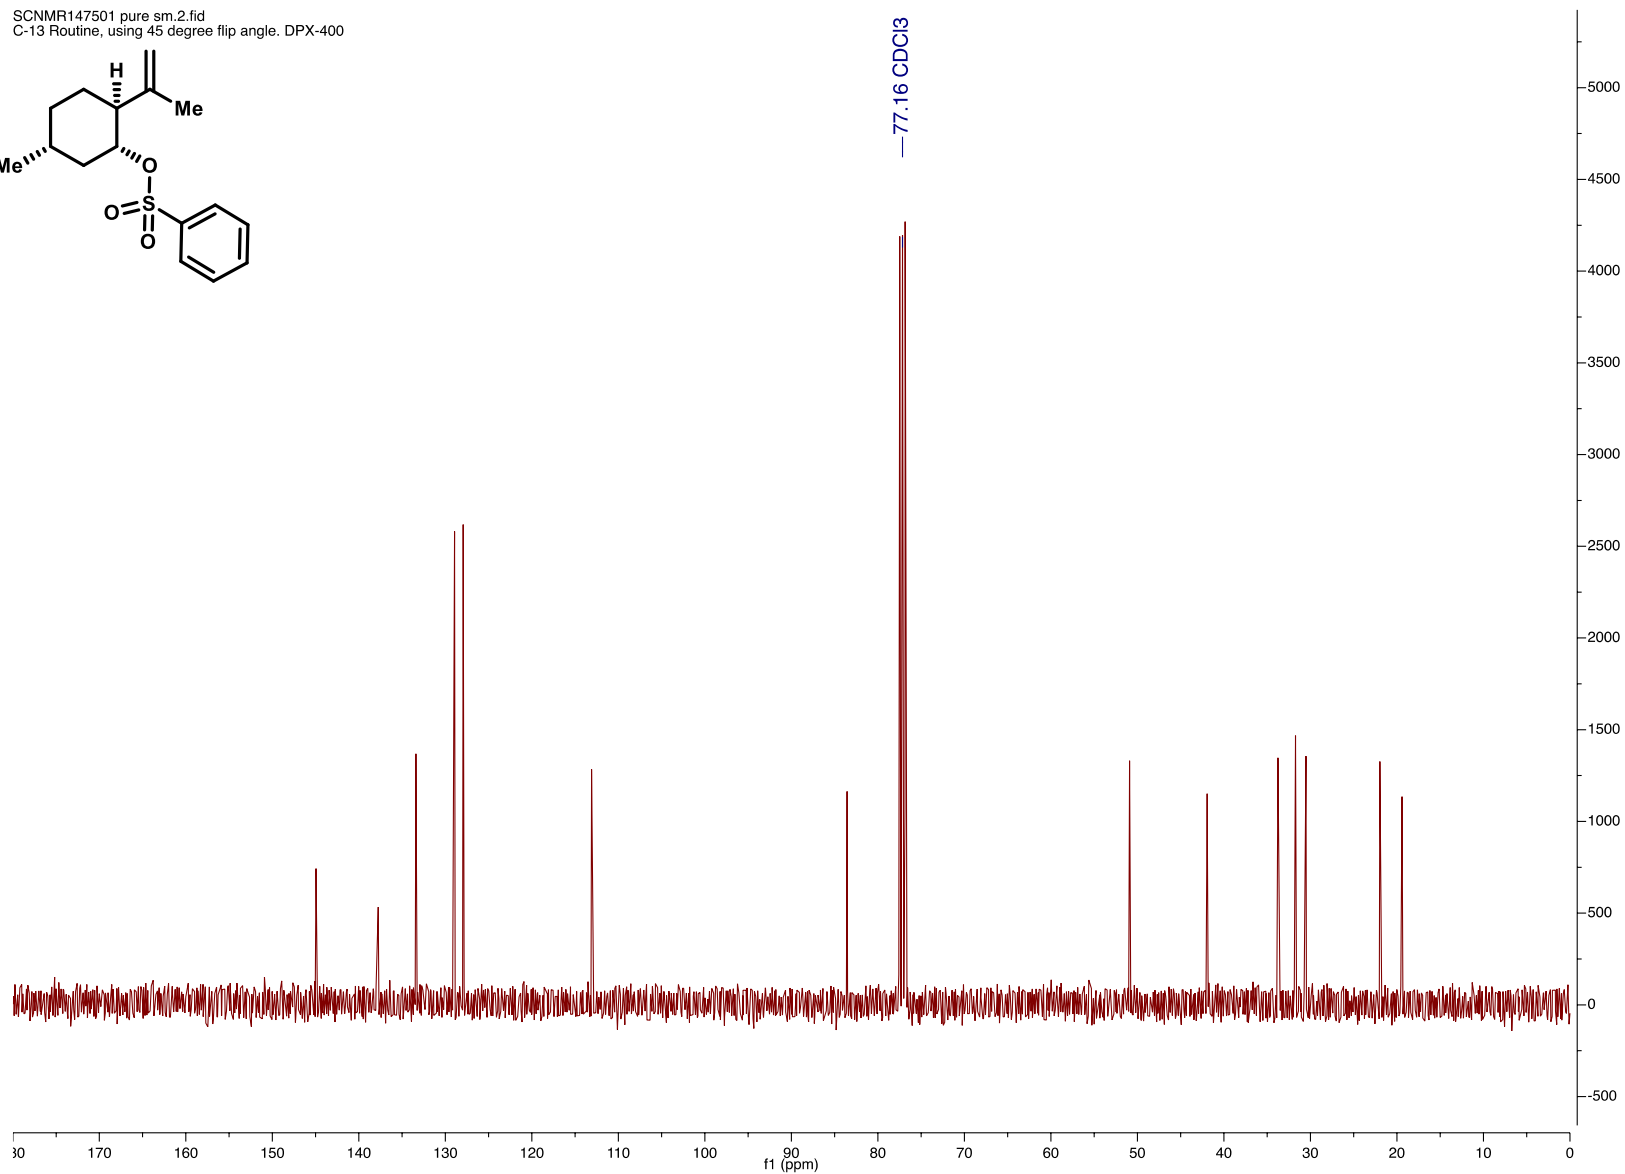

SCNMR147501 pure sm.2.fid  
C-13 Routine, using 45 degree flip angle. DPX-400

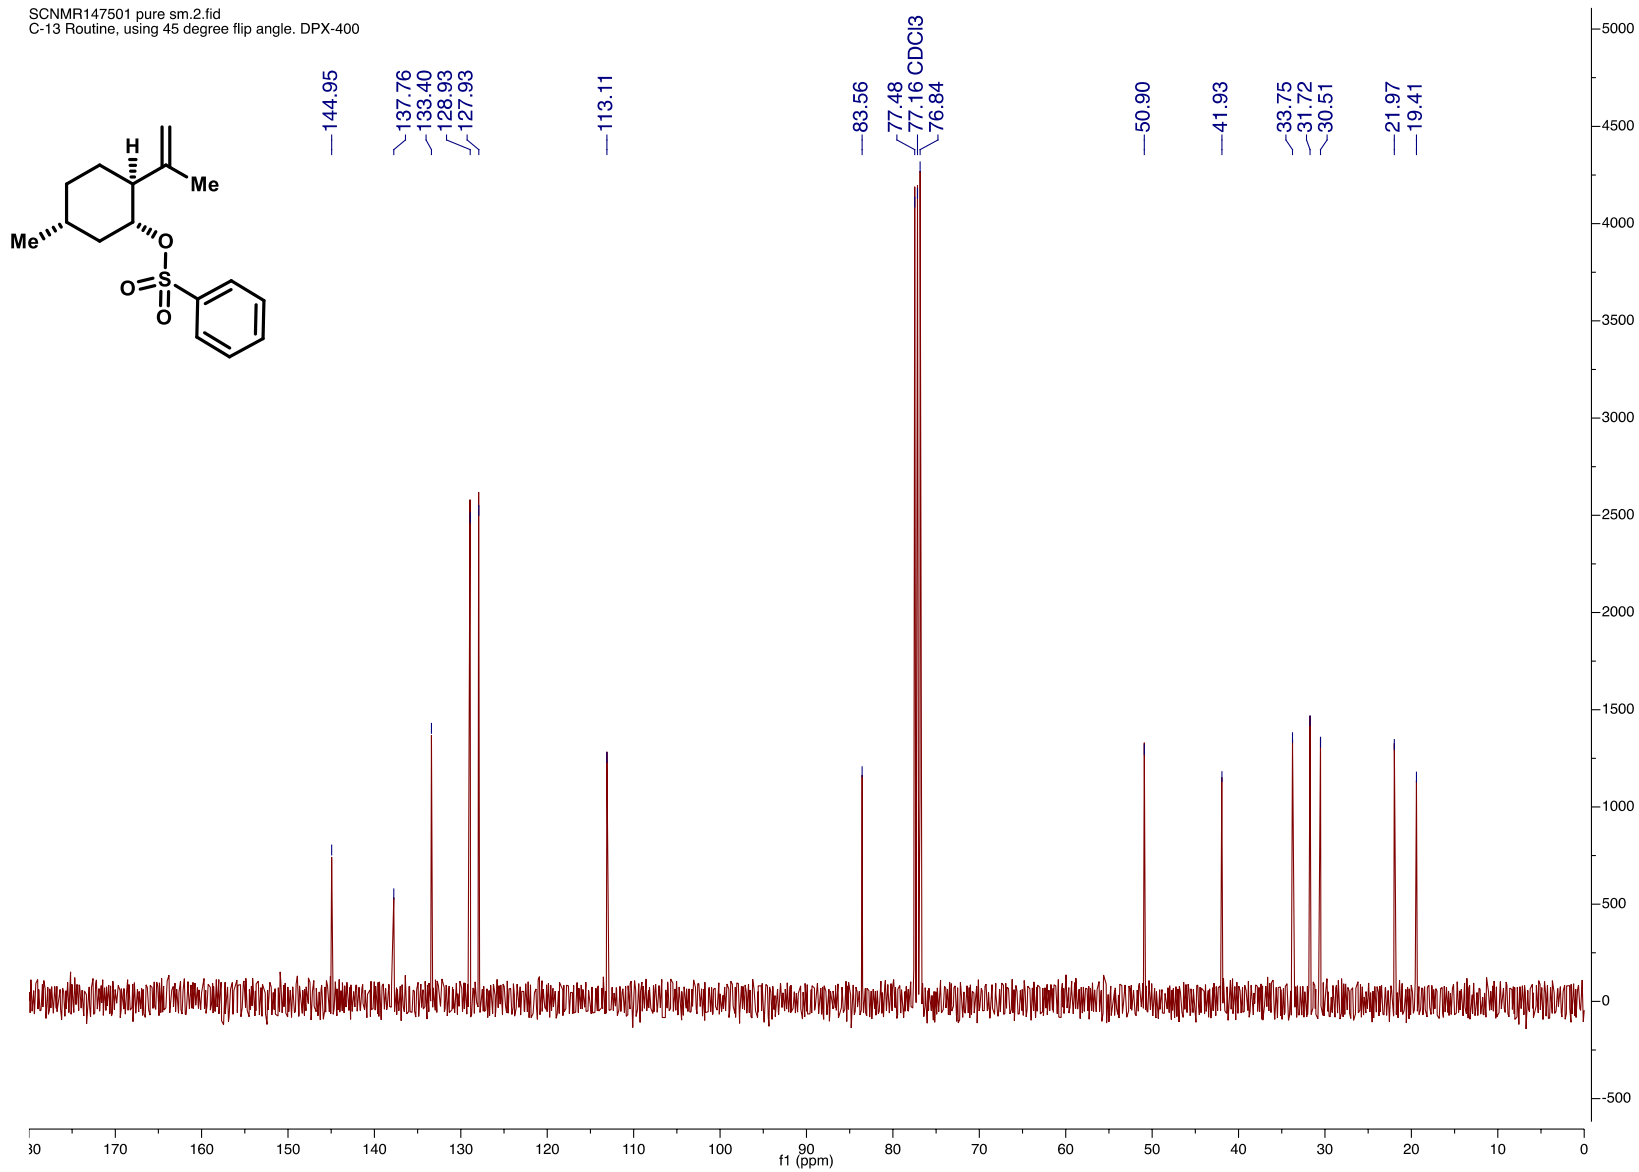

SI-01:  $^1\text{H}$ -NMR

sgz1-276-col2.1.fid  
H-1 Routine, DRX-500, BBO Probe

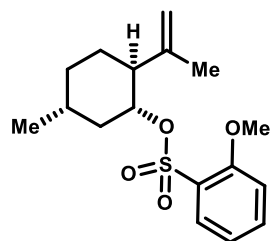

— 7.26 CDCl<sub>3</sub>

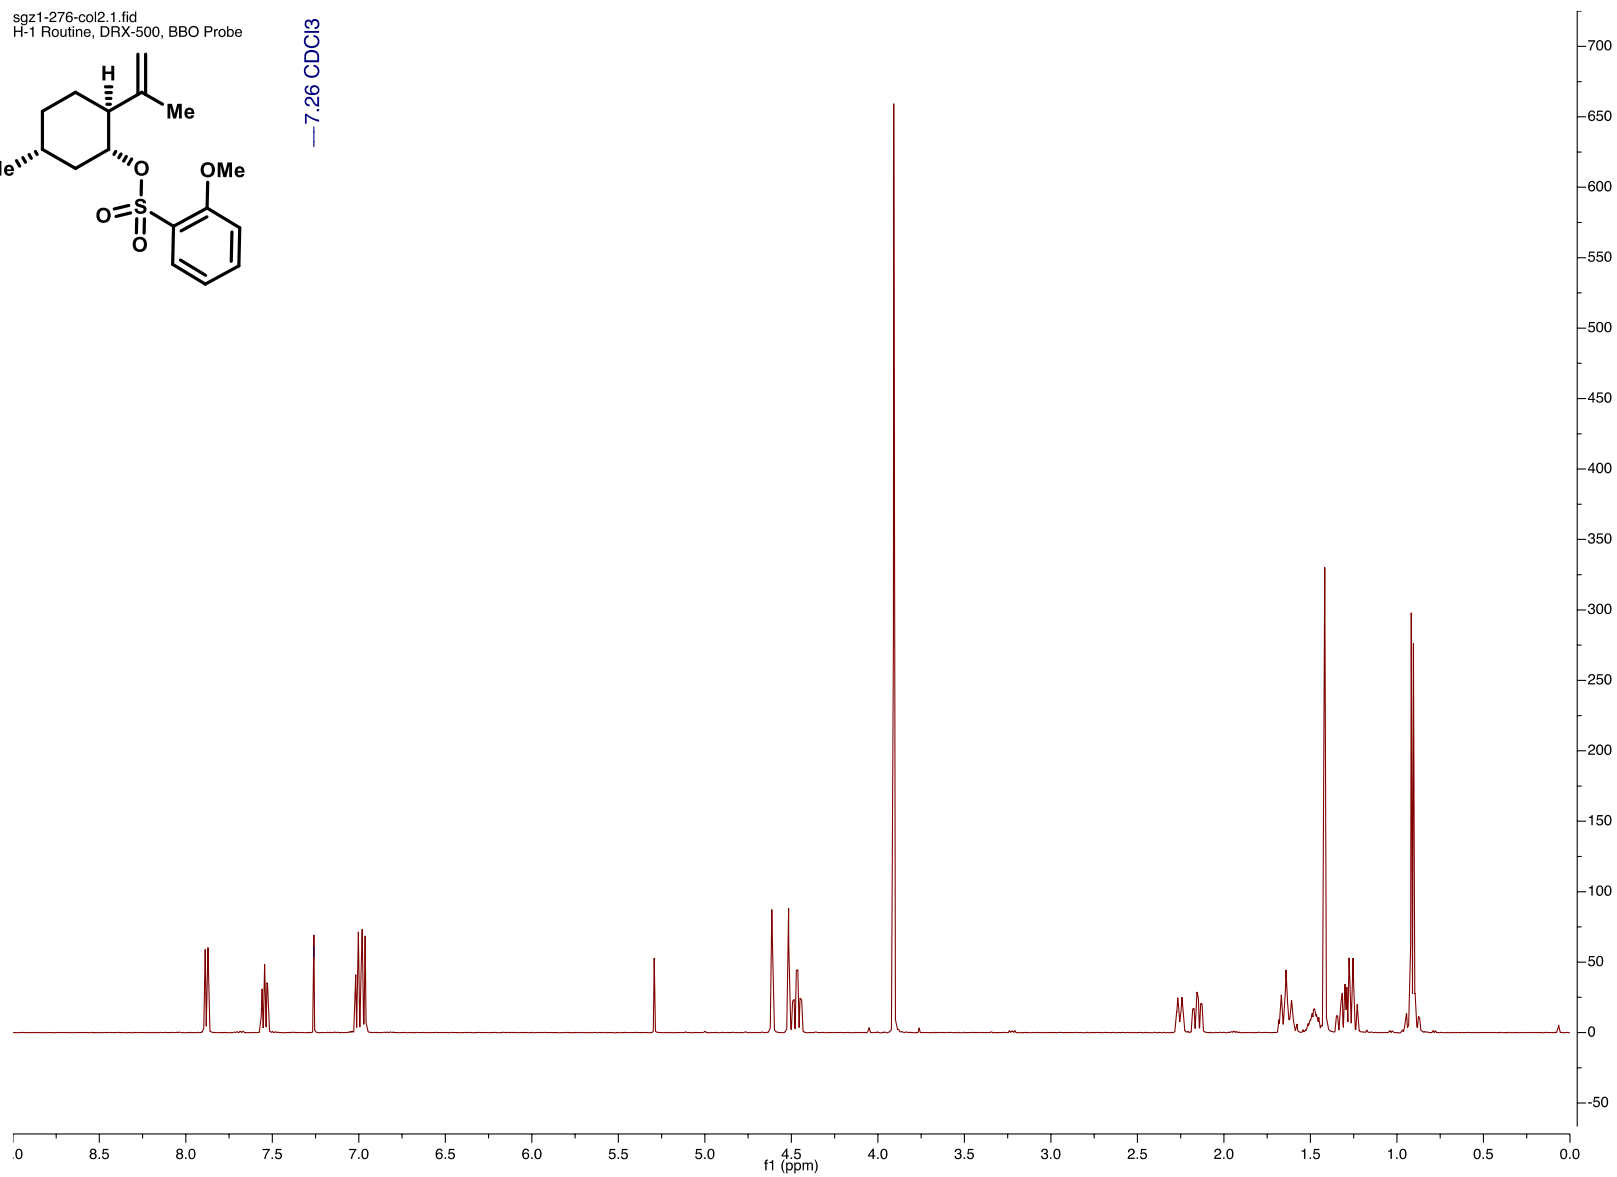

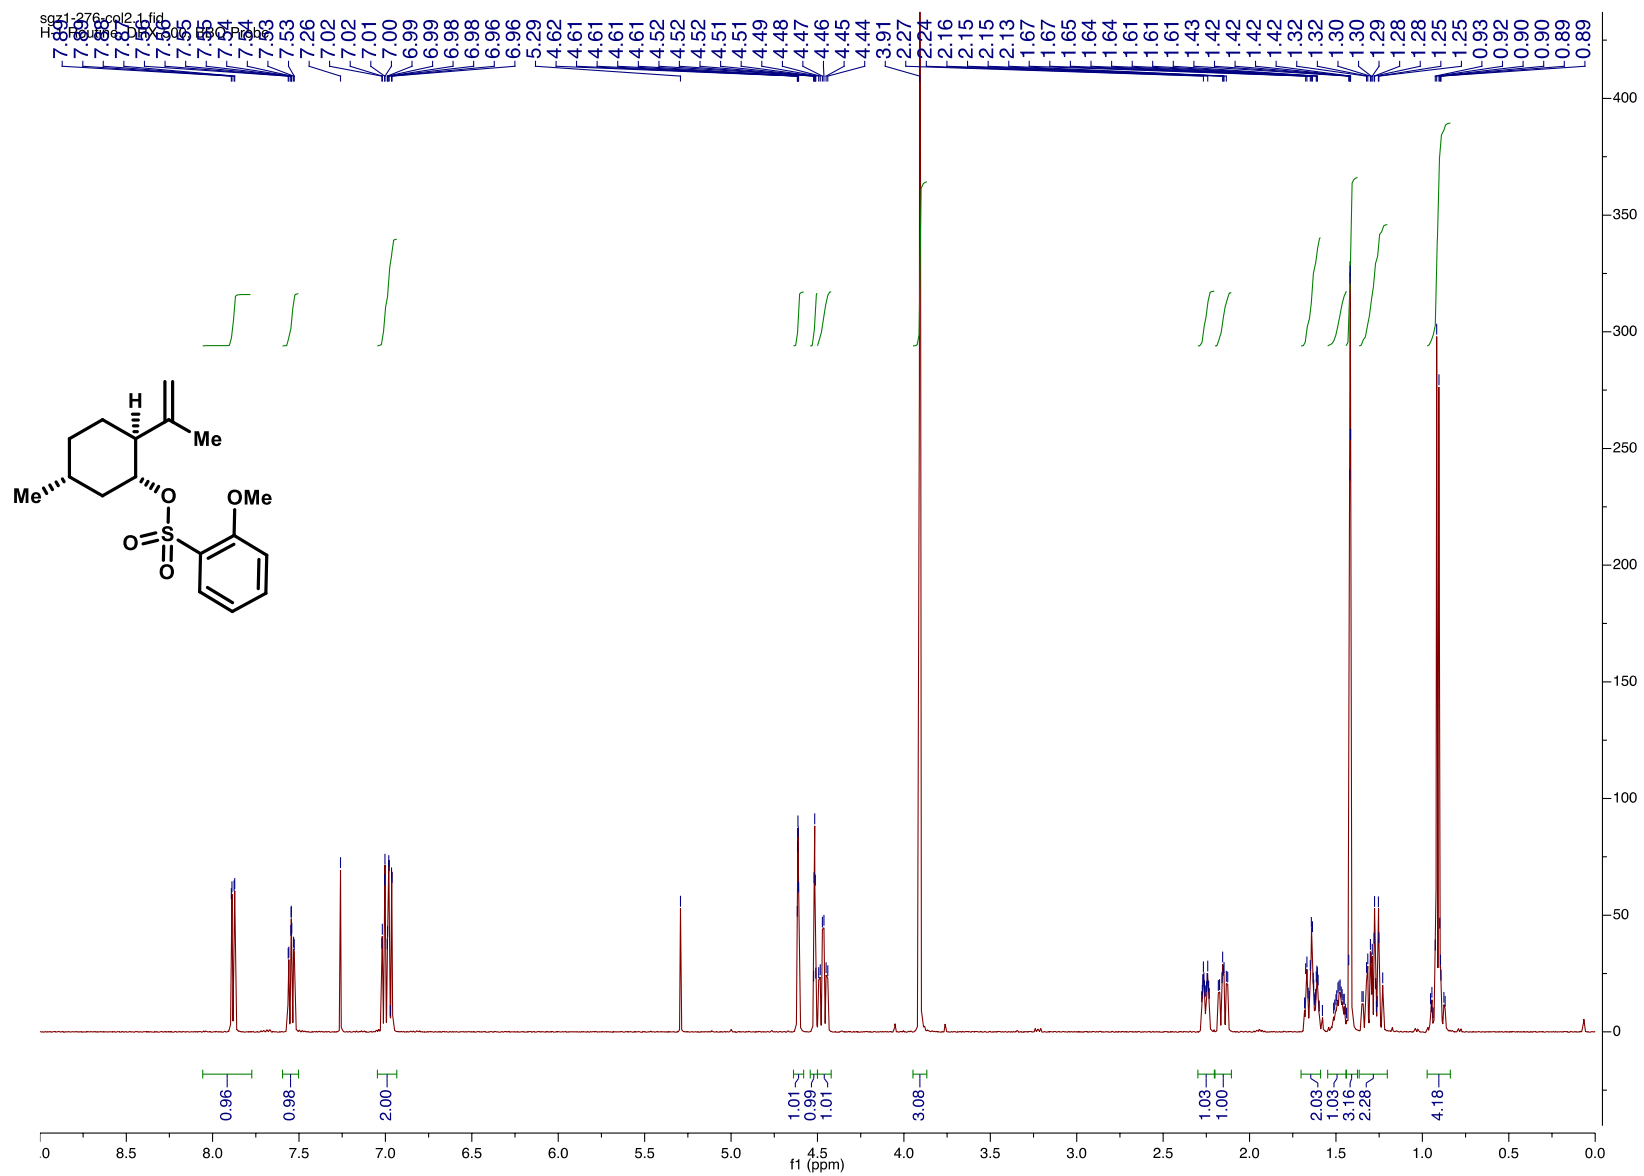

SI-01:  $^{13}\text{C}$ -NMR

sgz1-276-col2.2.fid  
C-13 Routine, BBO Probe, DRX-500

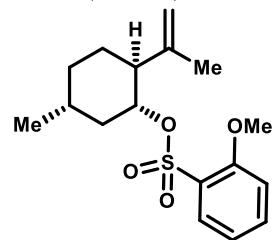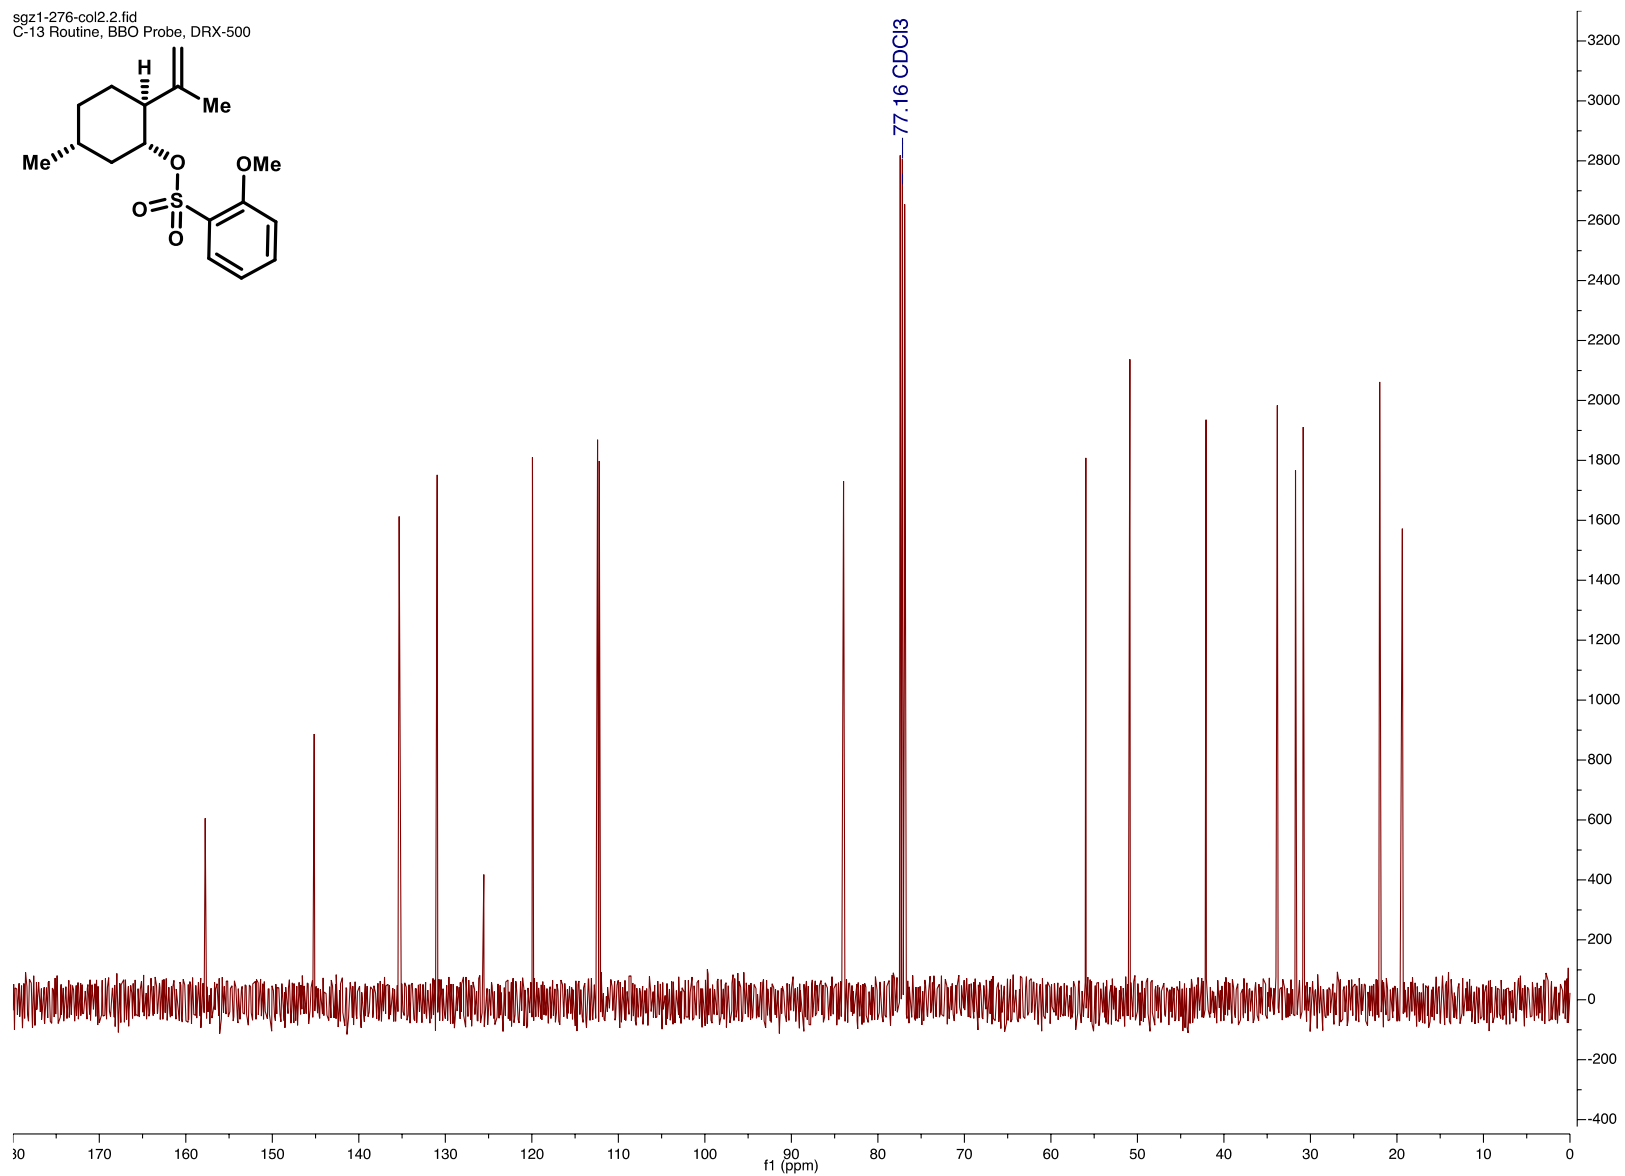



sgz1-276-col2.2.fid  
C-13 Routine, BBO Probe, DRX-500

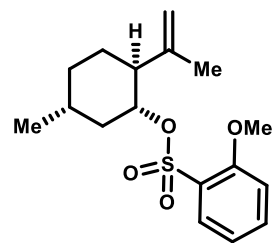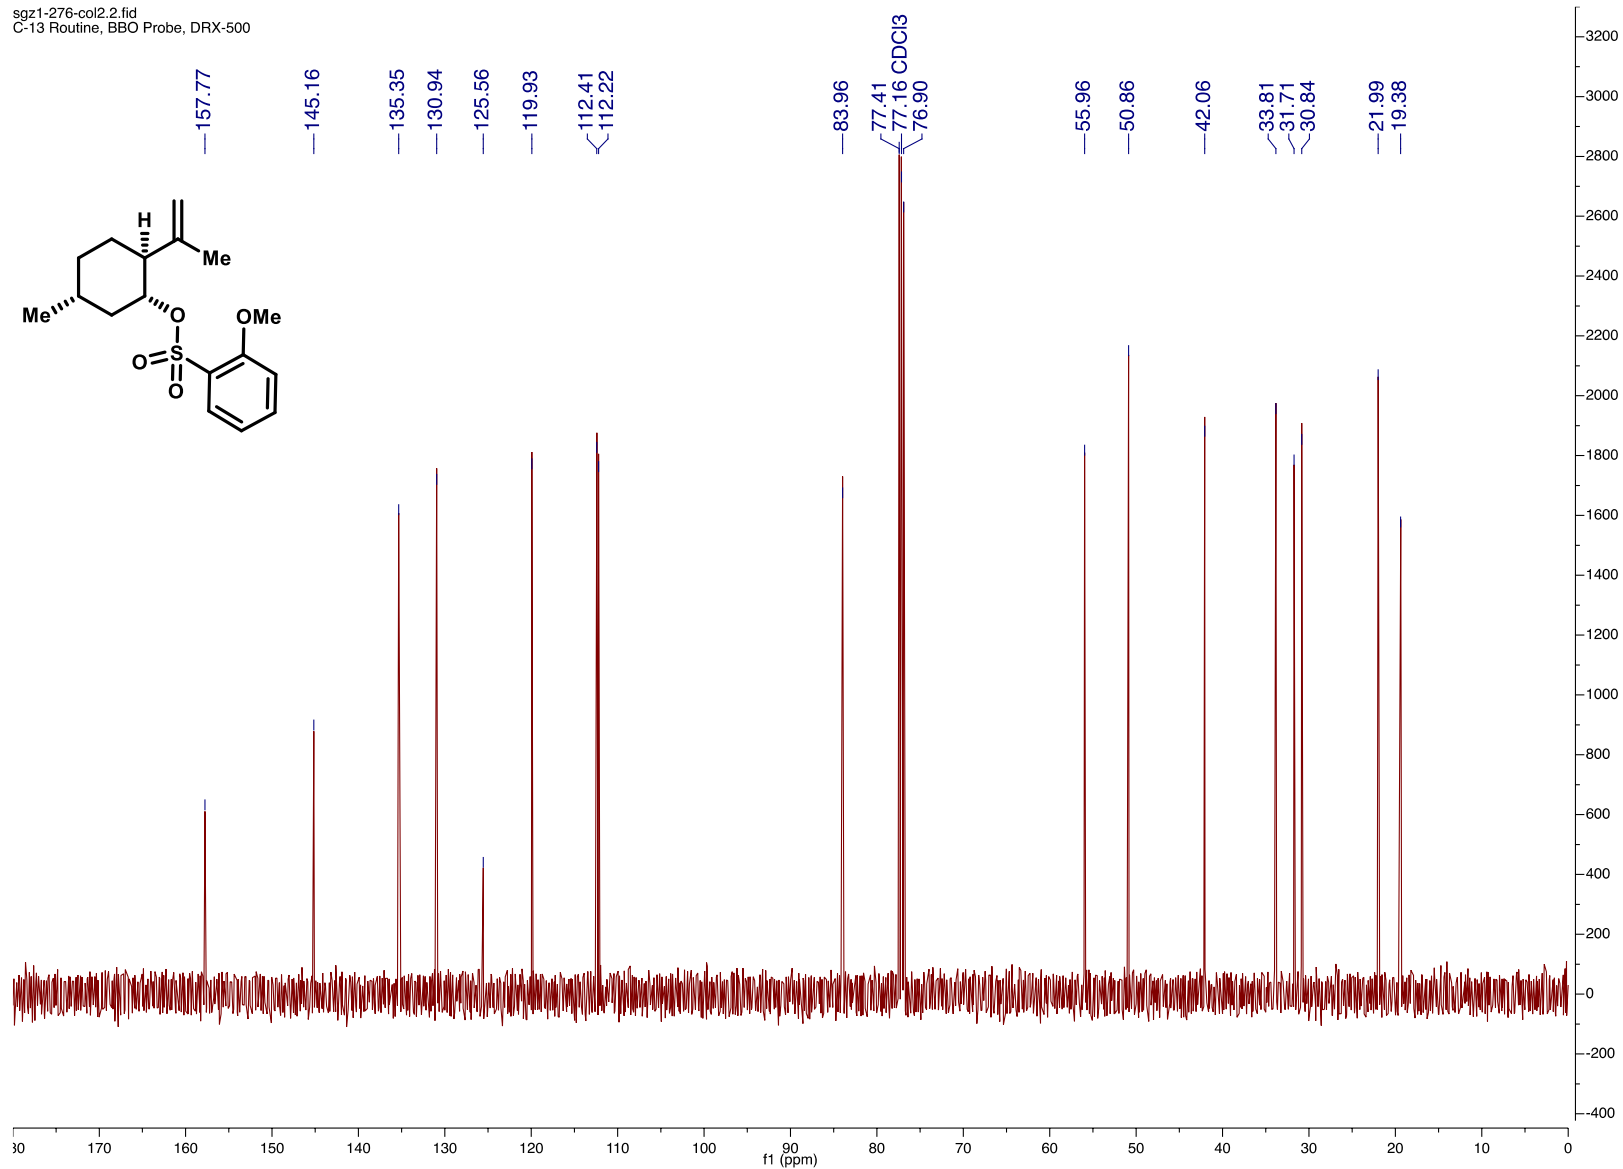

4a:  $^1\text{H}$ -NMR

SCNMR156101.1.fid  
H-1 Routine. CPQCI, AVIII-600, 12-20-2013

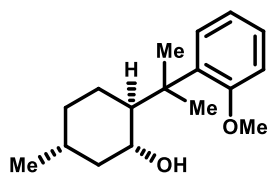

— 7.26 CDCl<sub>3</sub>

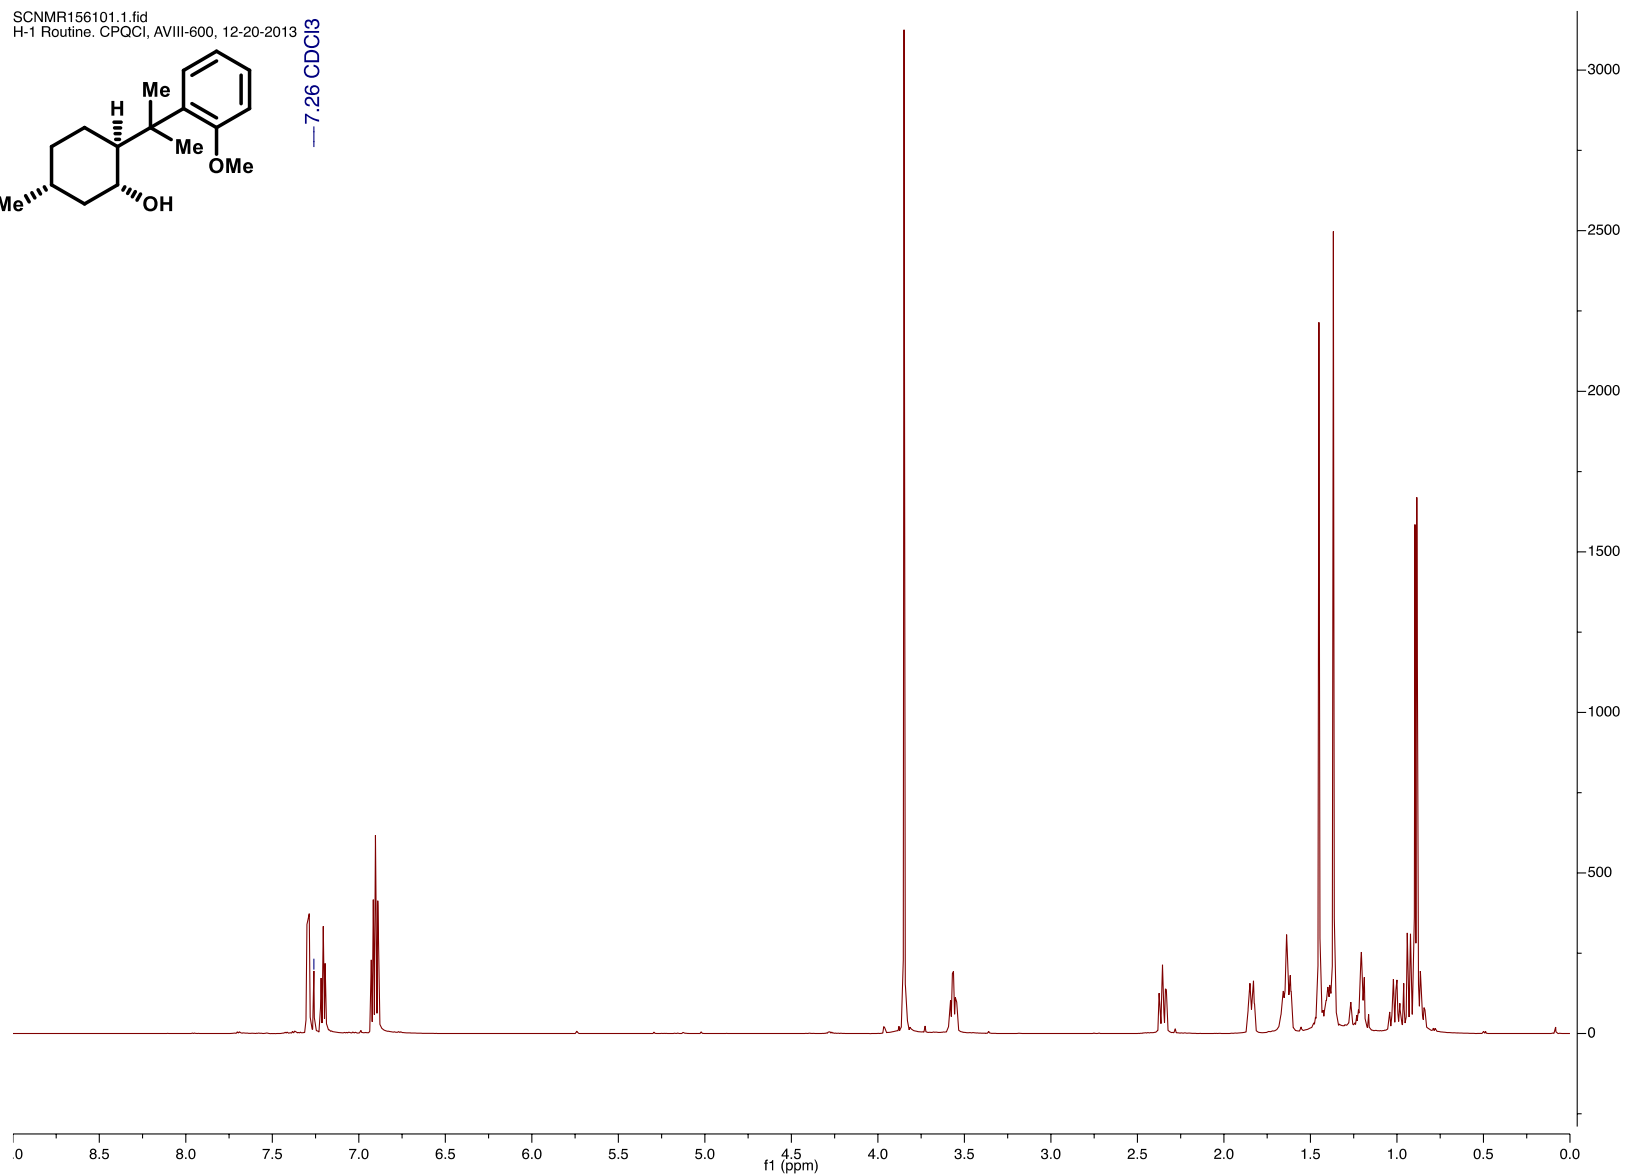

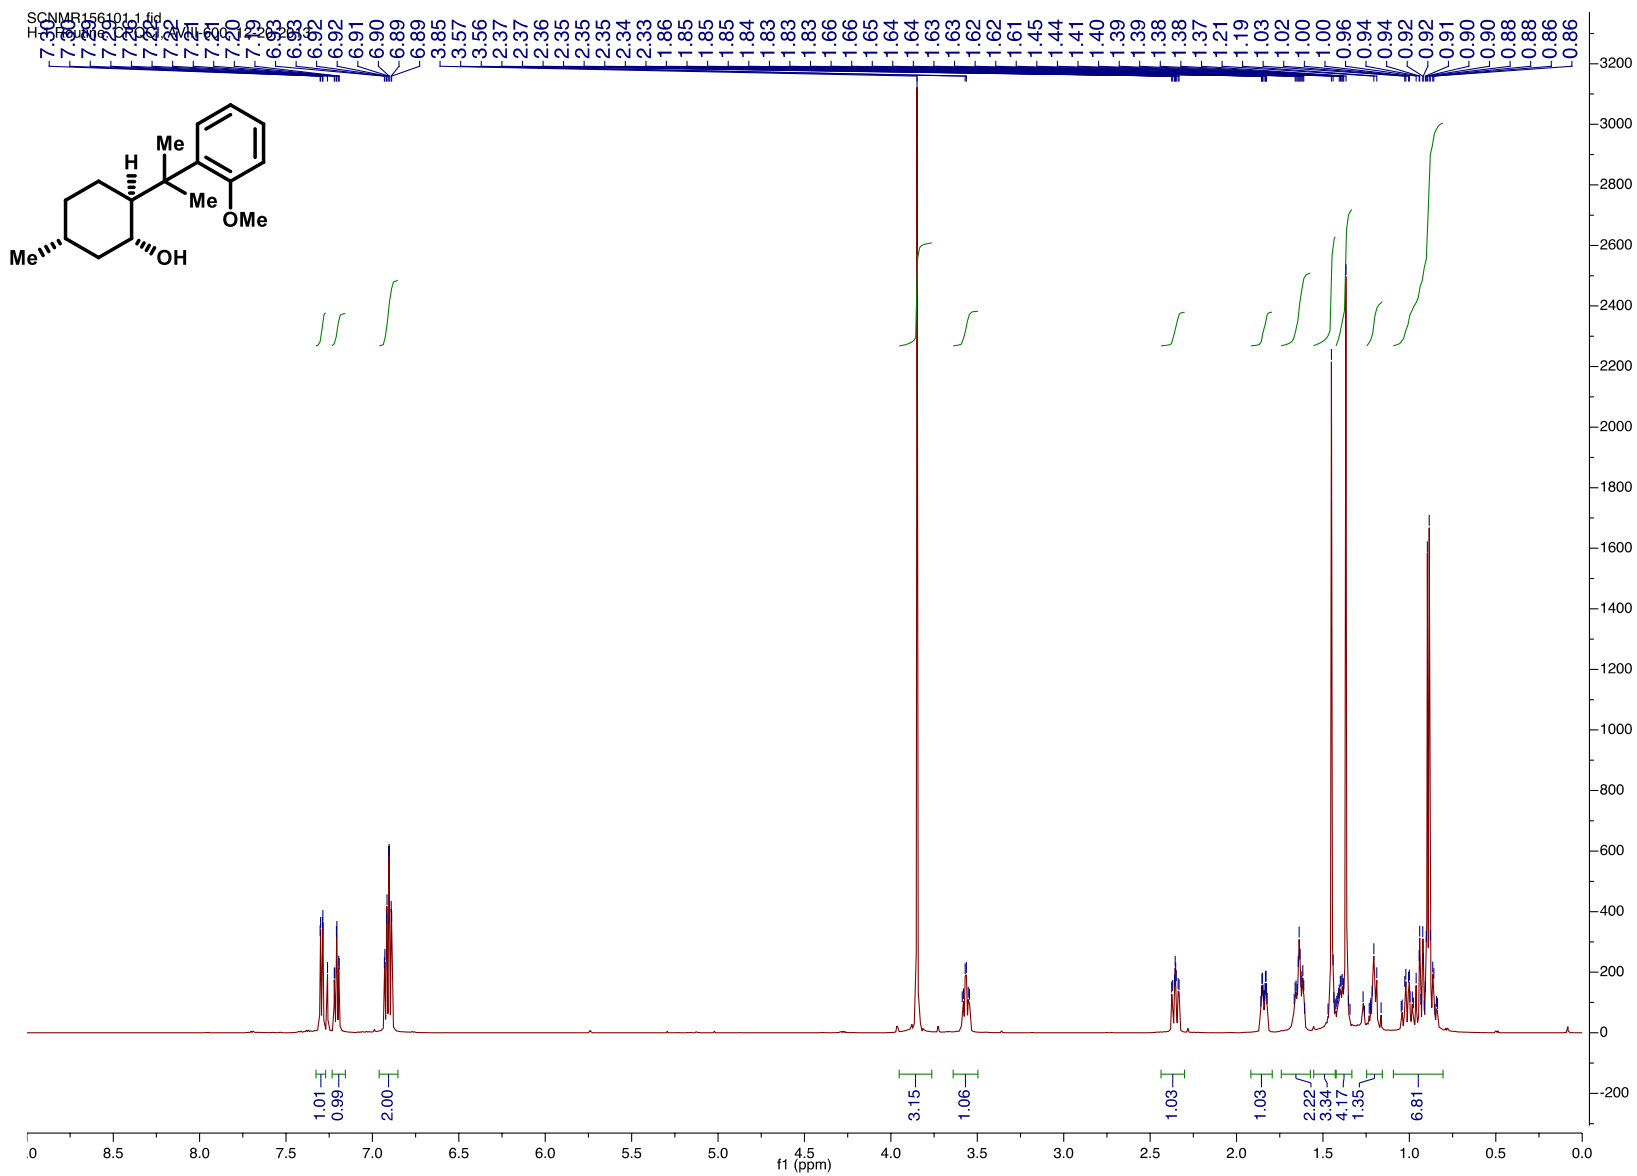

4a:  $^{13}\text{C}$ -NMR

SCNMR156101.2.fid  
C-13 Routine. CPQCI, AVIII-600, 12-20-2013

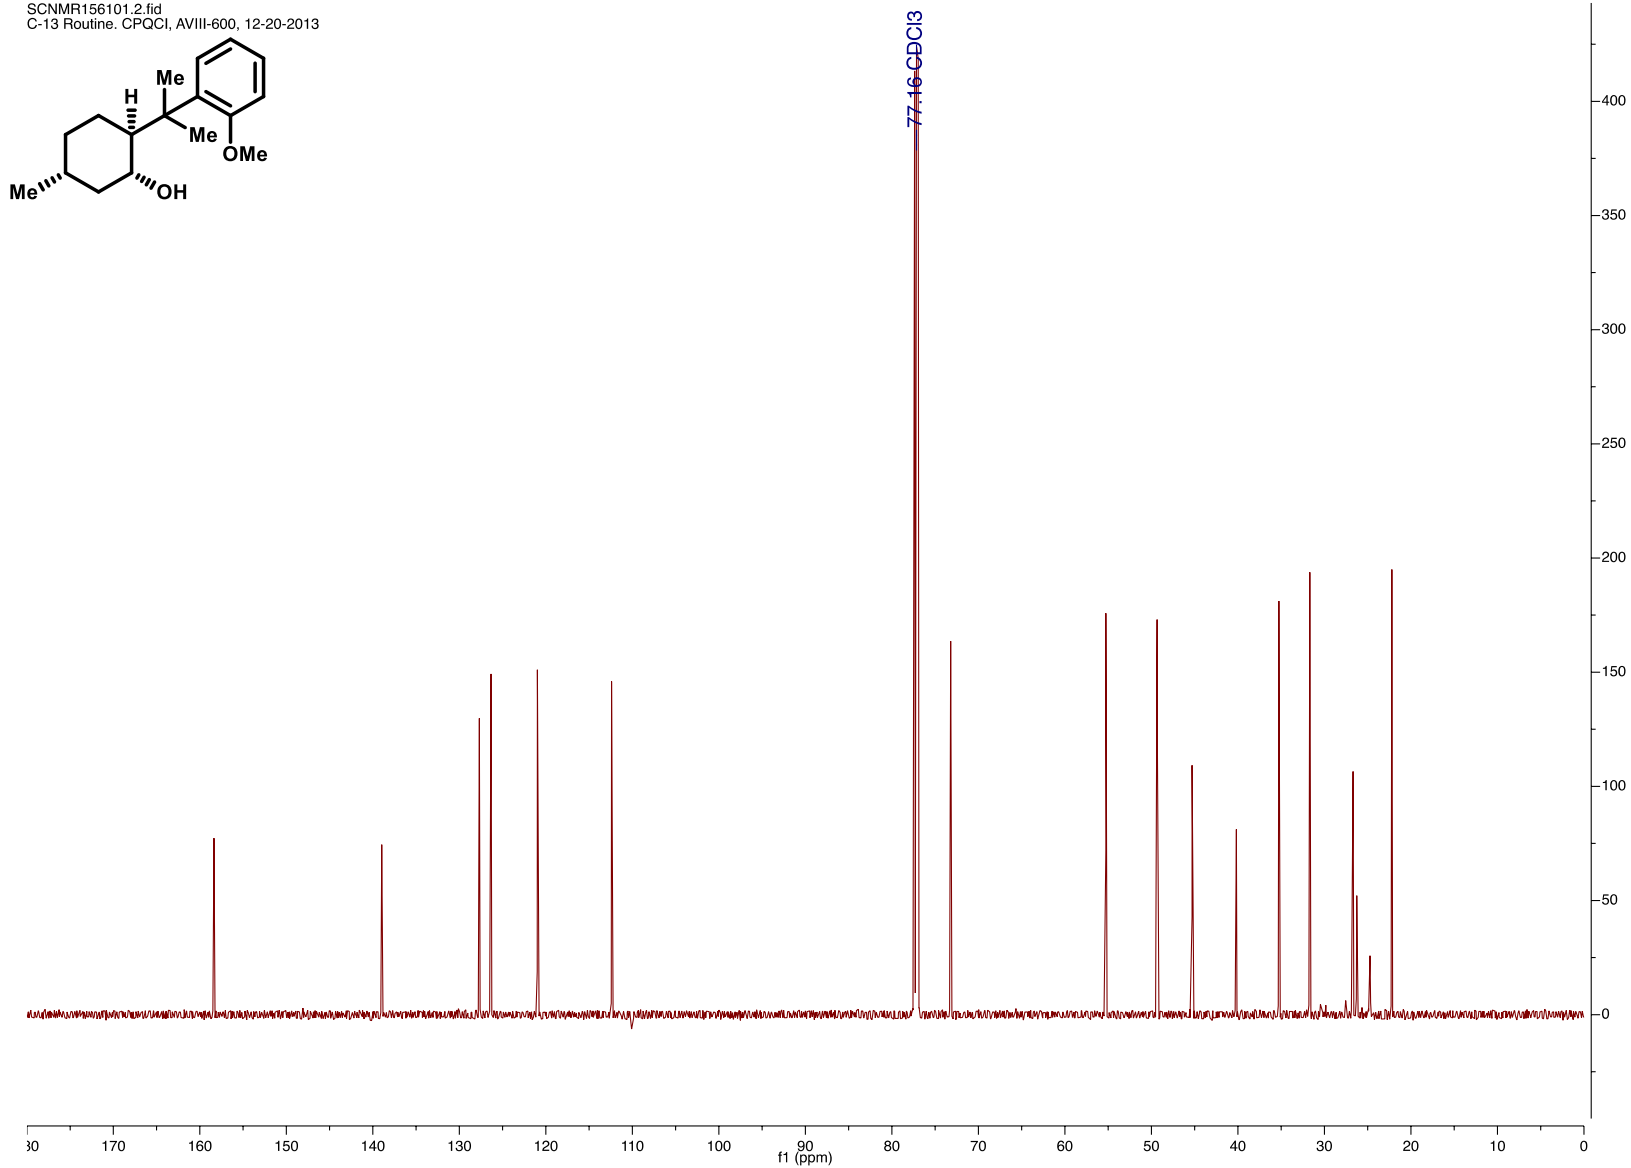

SCNMR156101.2.fid  
C-13 Routine. CPQCI, AVIII-600, 12-20-2013

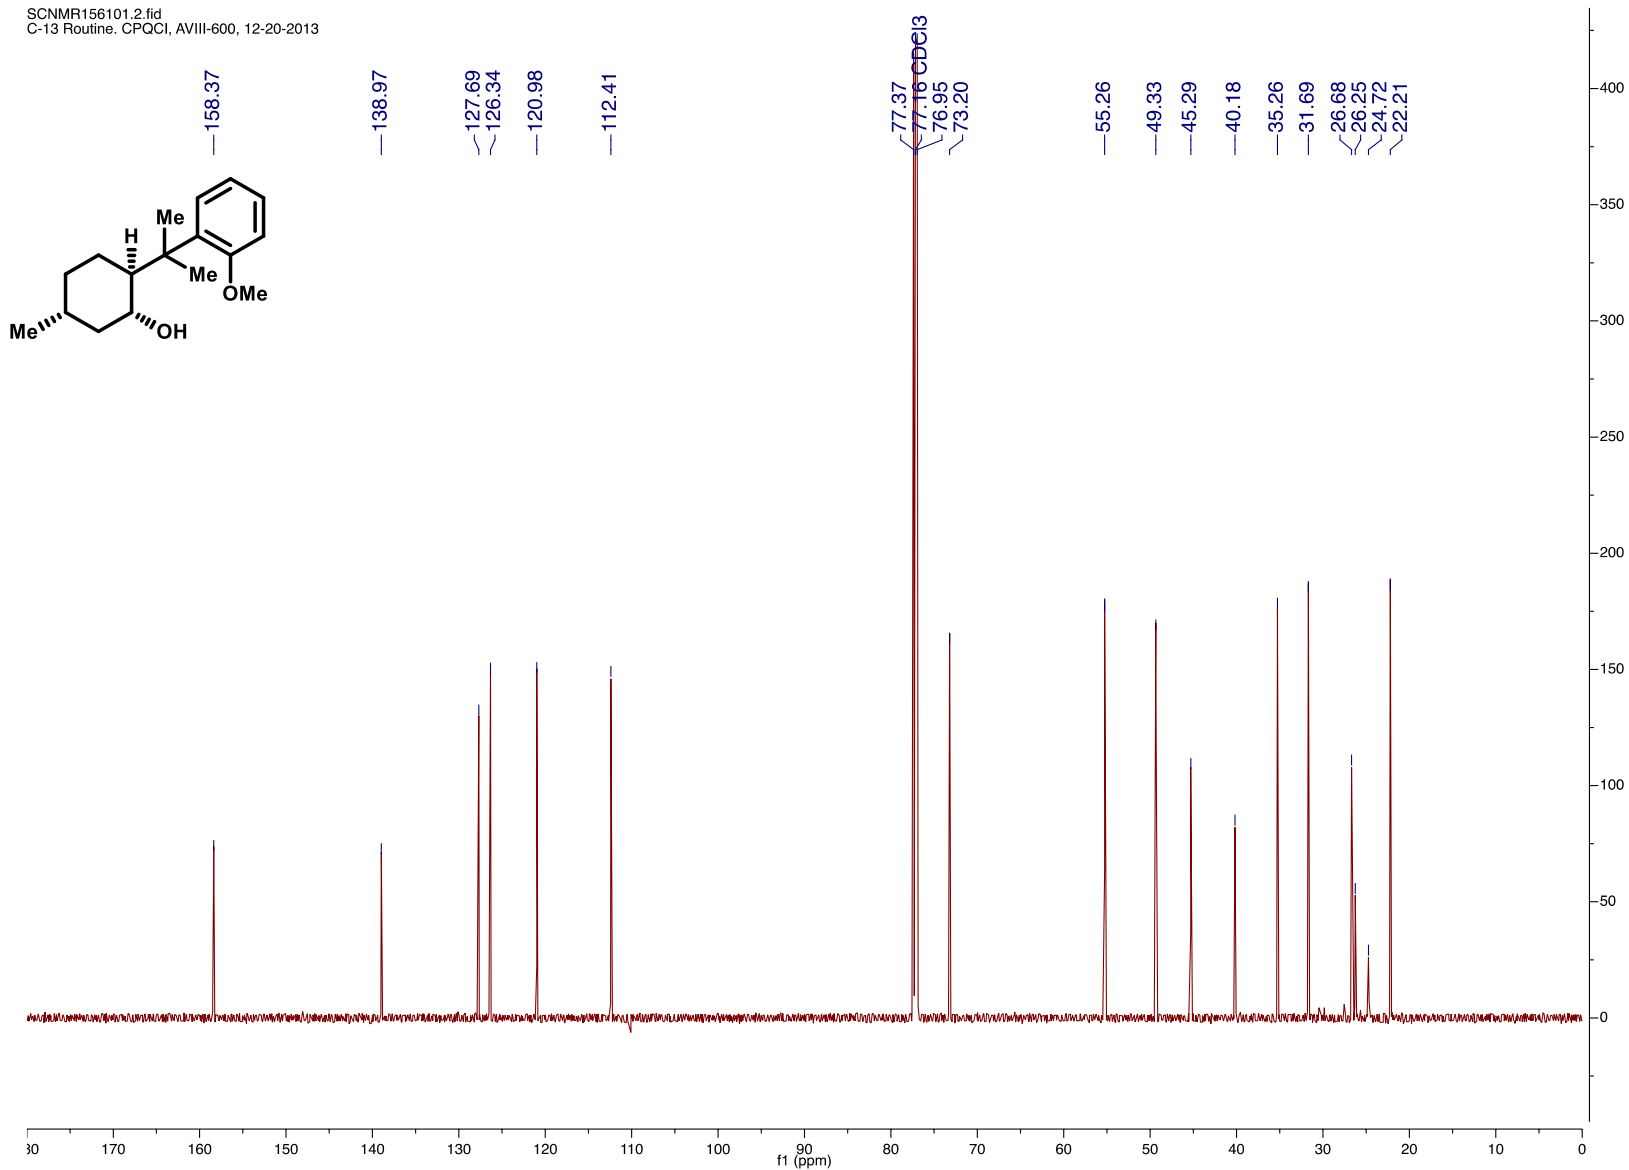

SI-02: <sup>1</sup>H-NMR

RMM2\_027\_wsh.1.fid

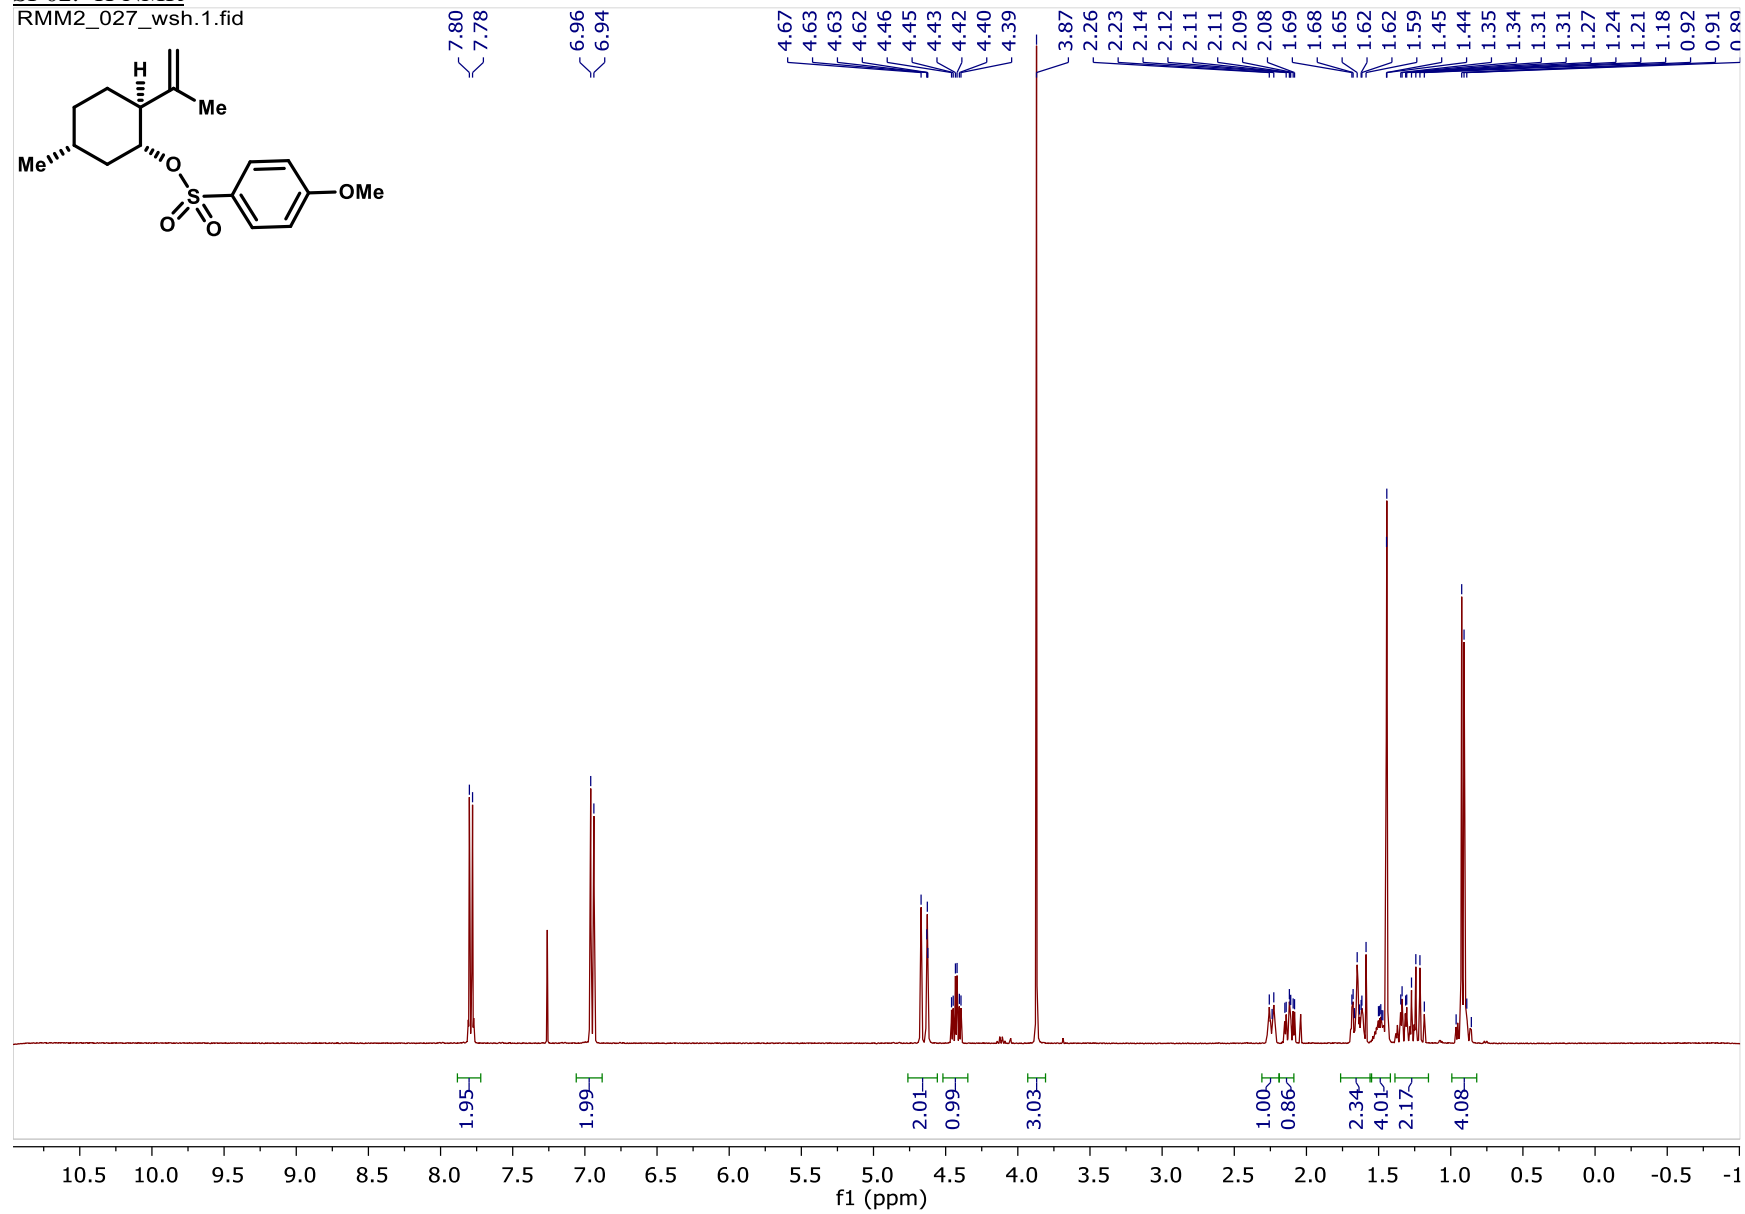

SI-02:  $^{13}\text{C}$ -NMR

RMM2\_027\_wsh.2.fid

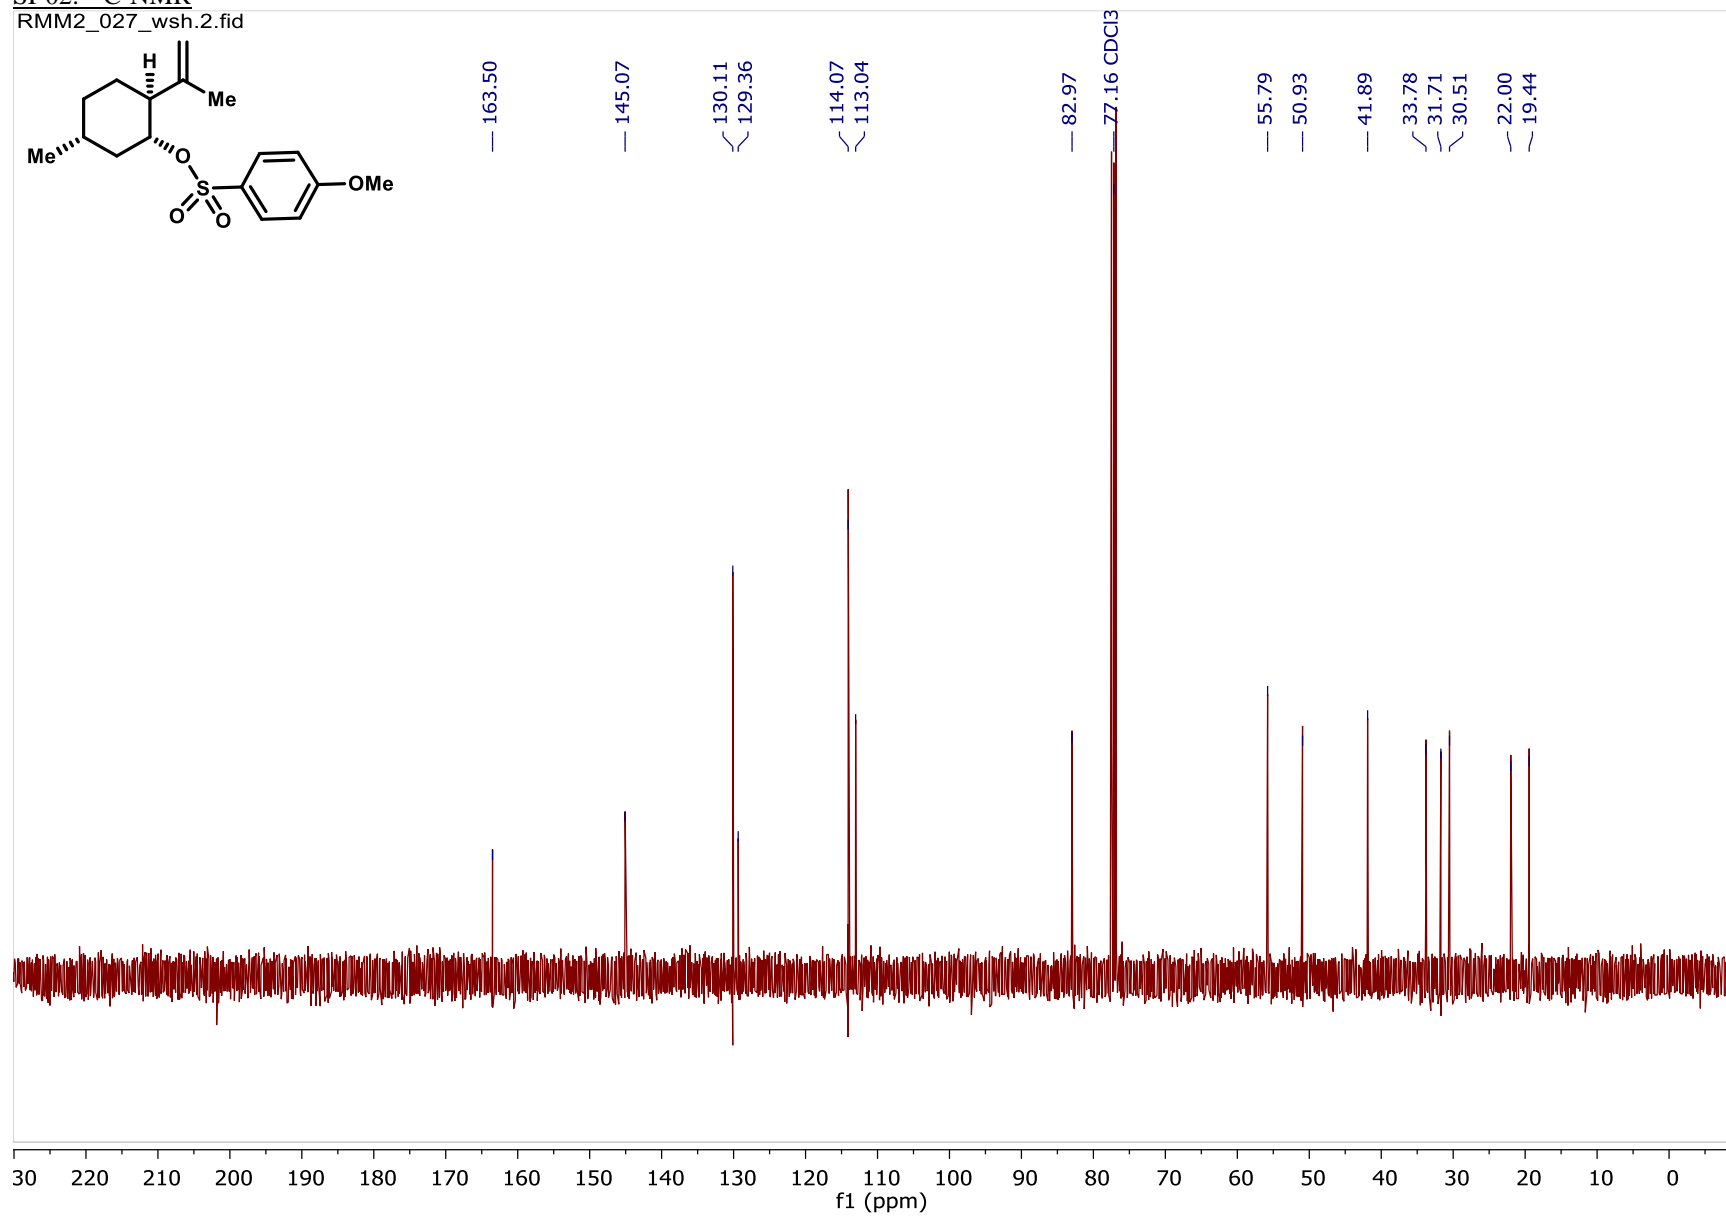

RMM2\_020\_rescan.1.fid

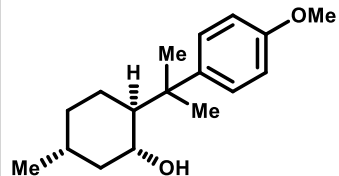



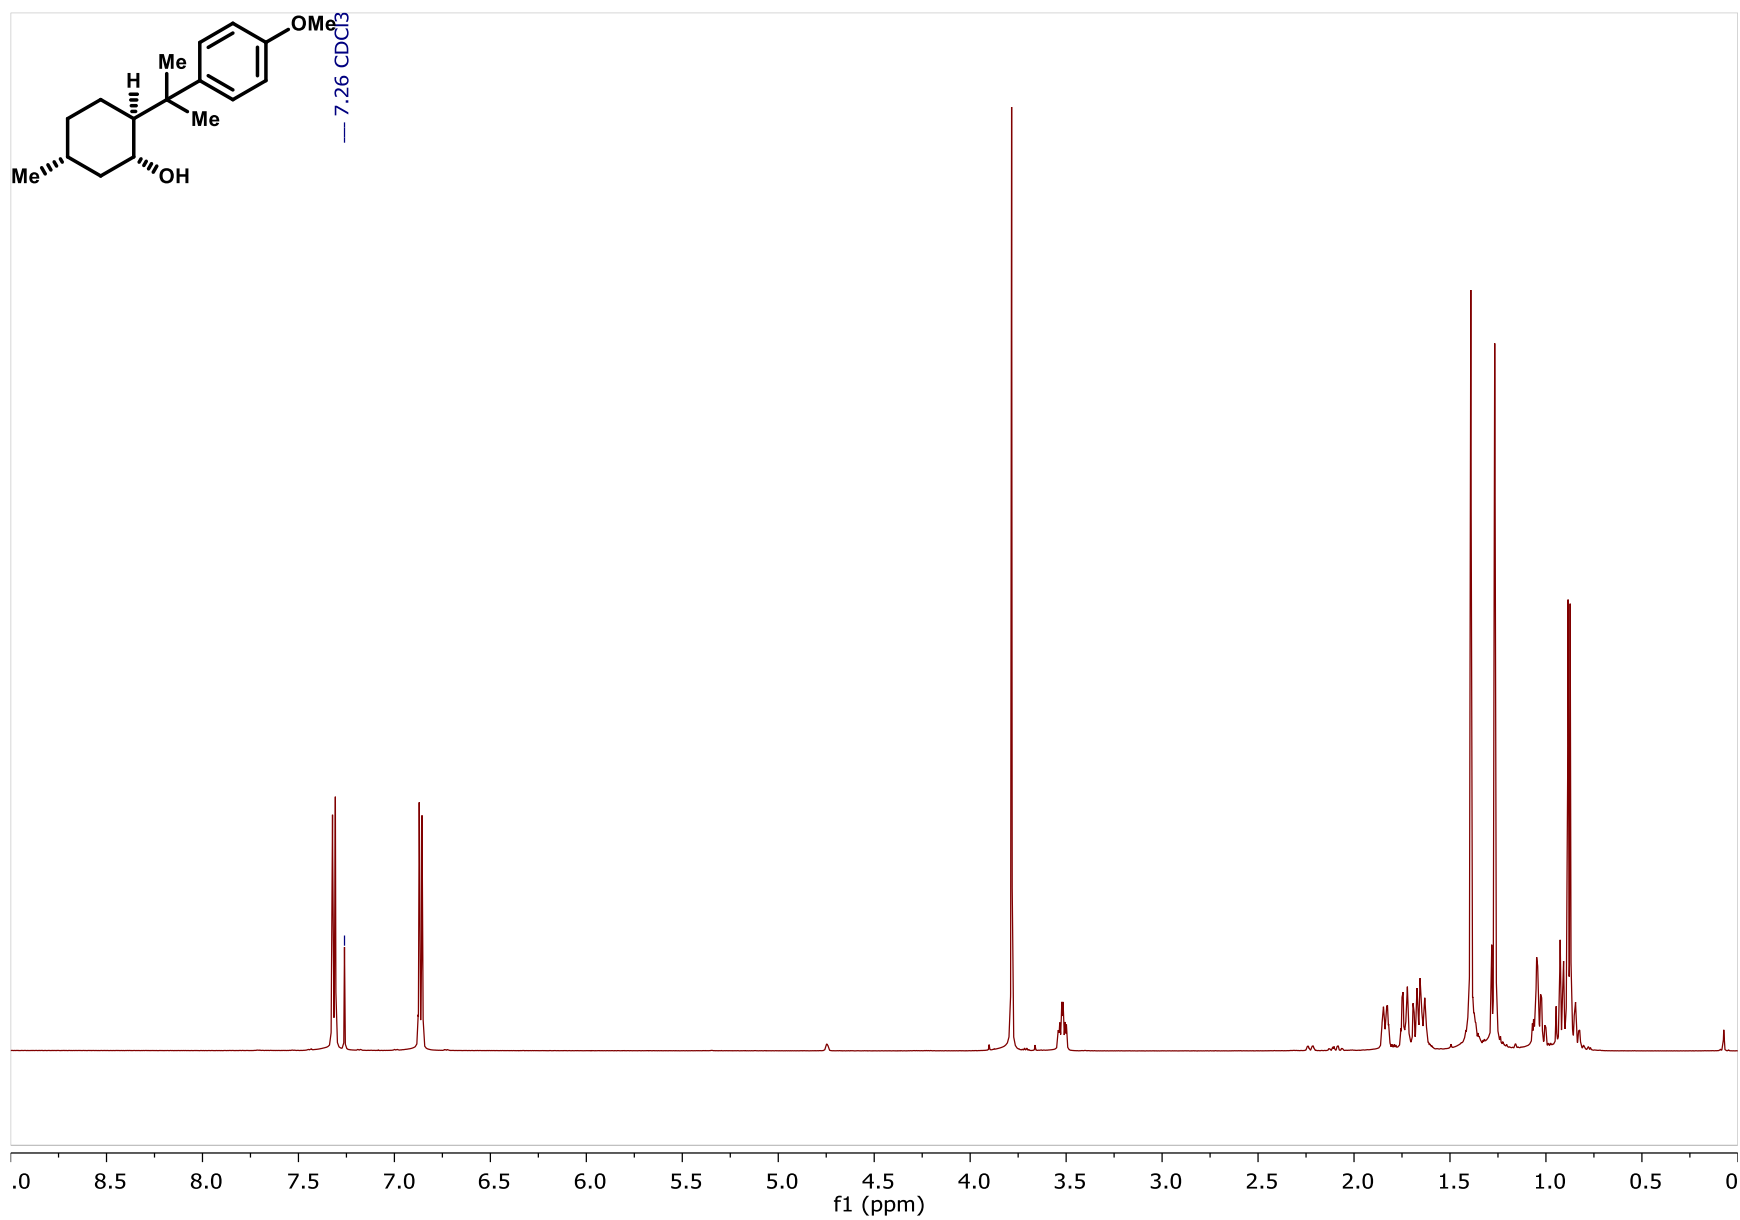

4b:  $^{13}\text{C}$ -NMR (151 MHz,  $\text{CDCl}_3$ )

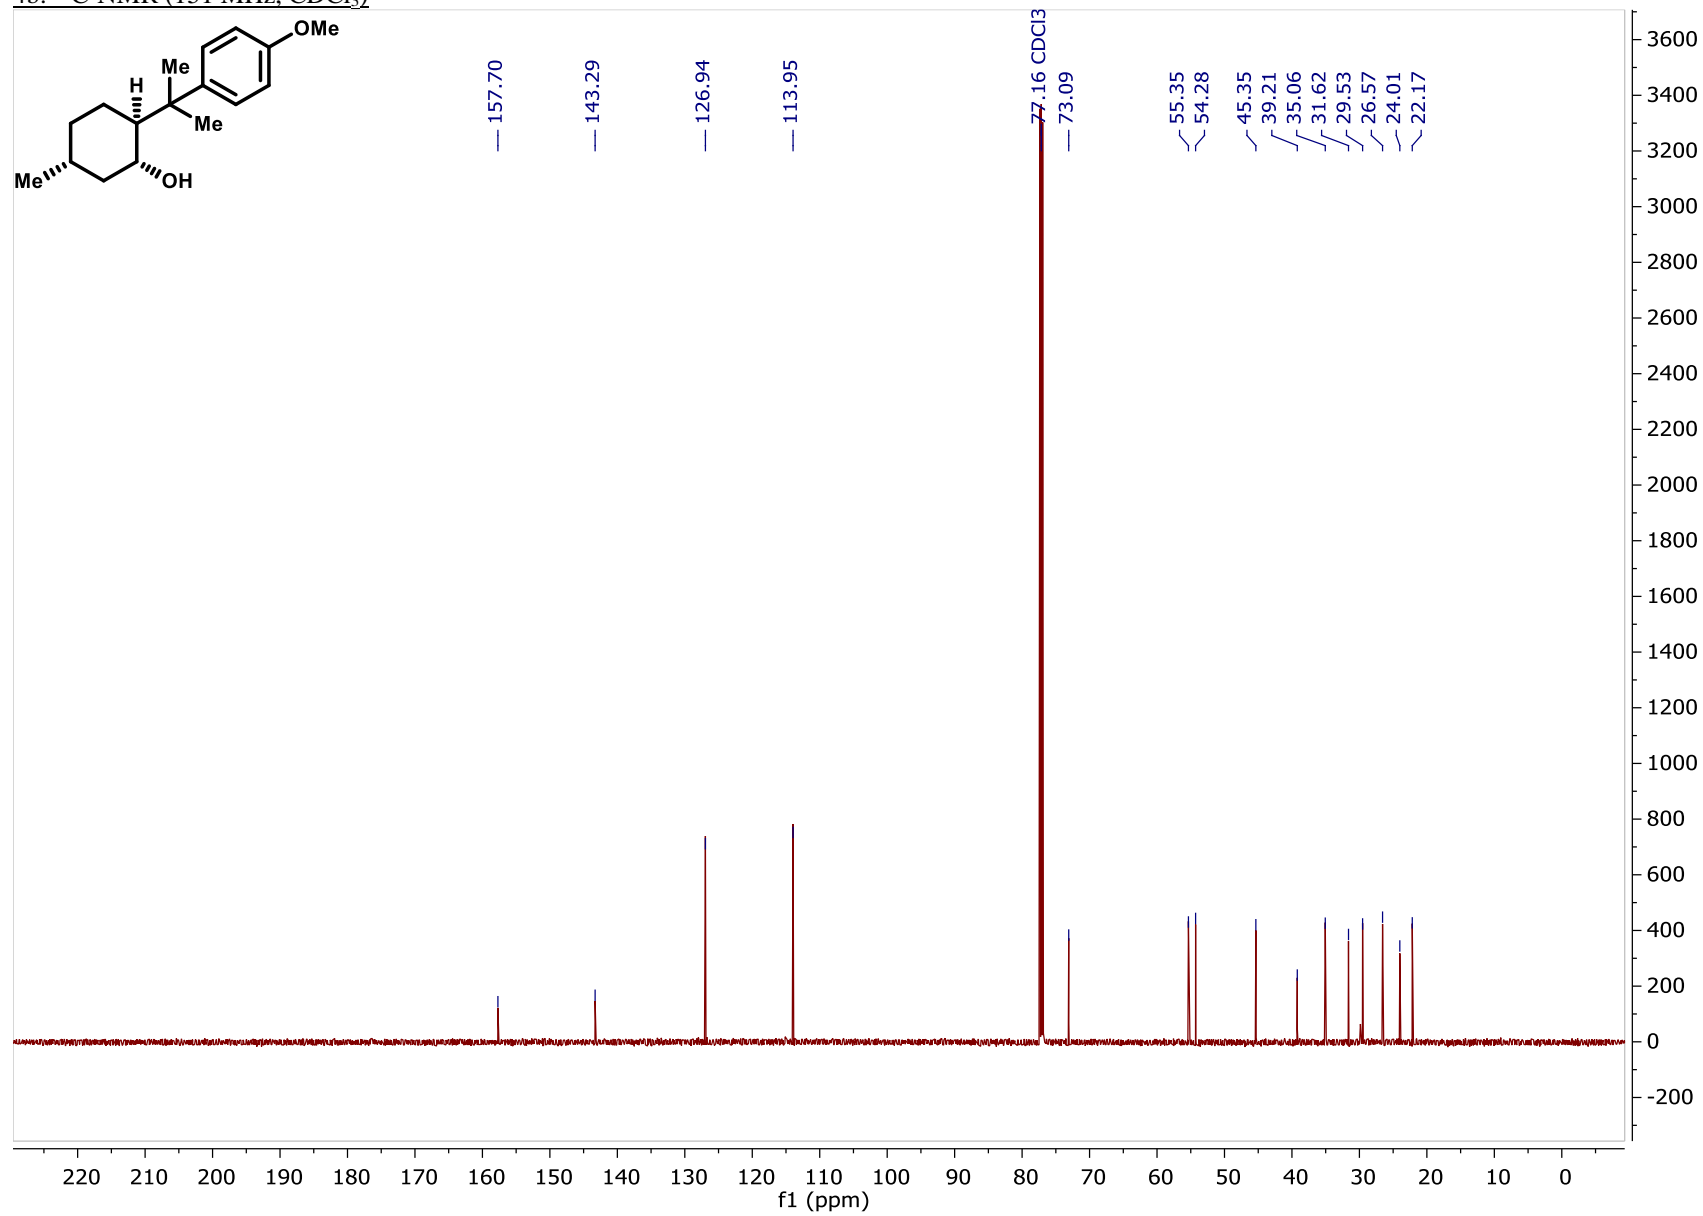

SI-03:  $^1\text{H}$ -NMR

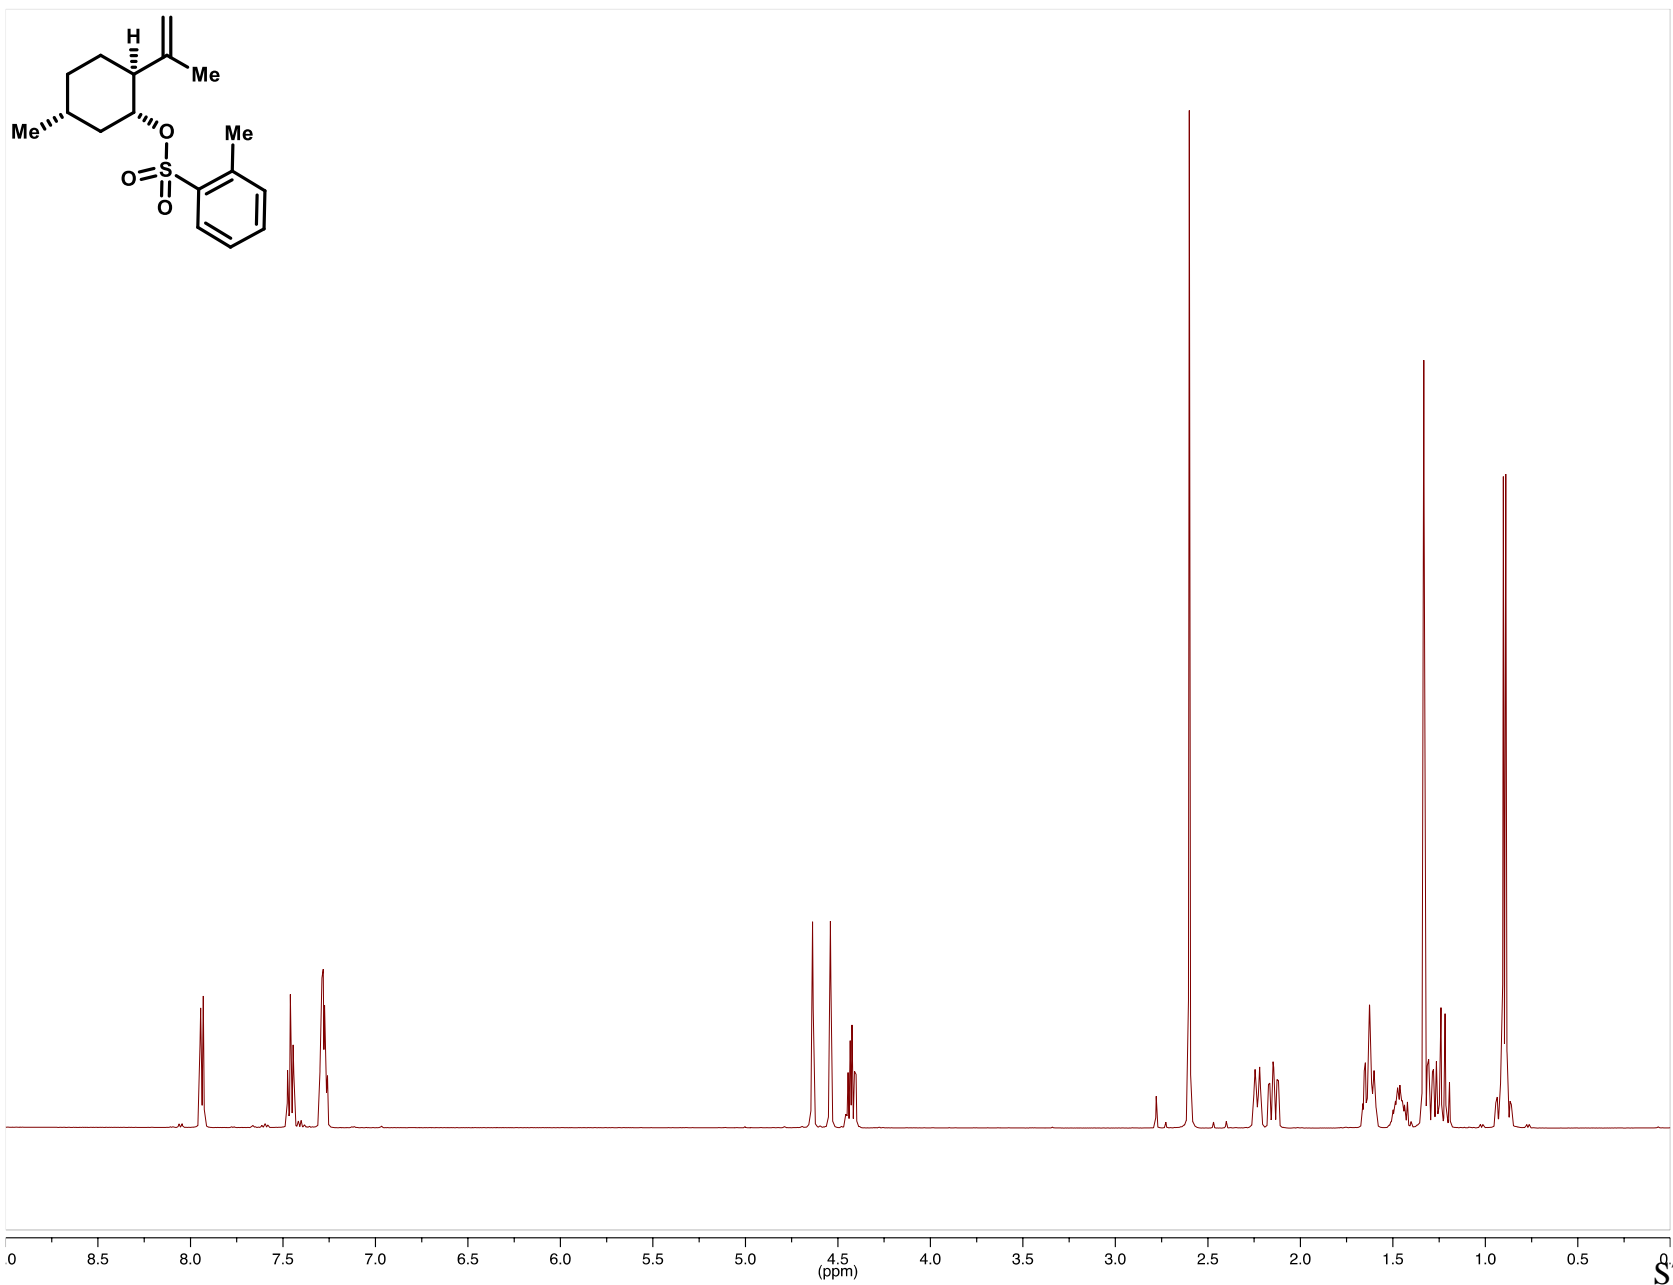

SI-03:  $^{13}\text{C}$ -NMR

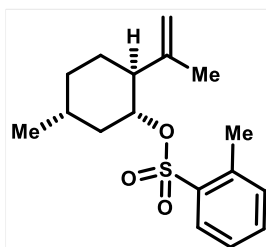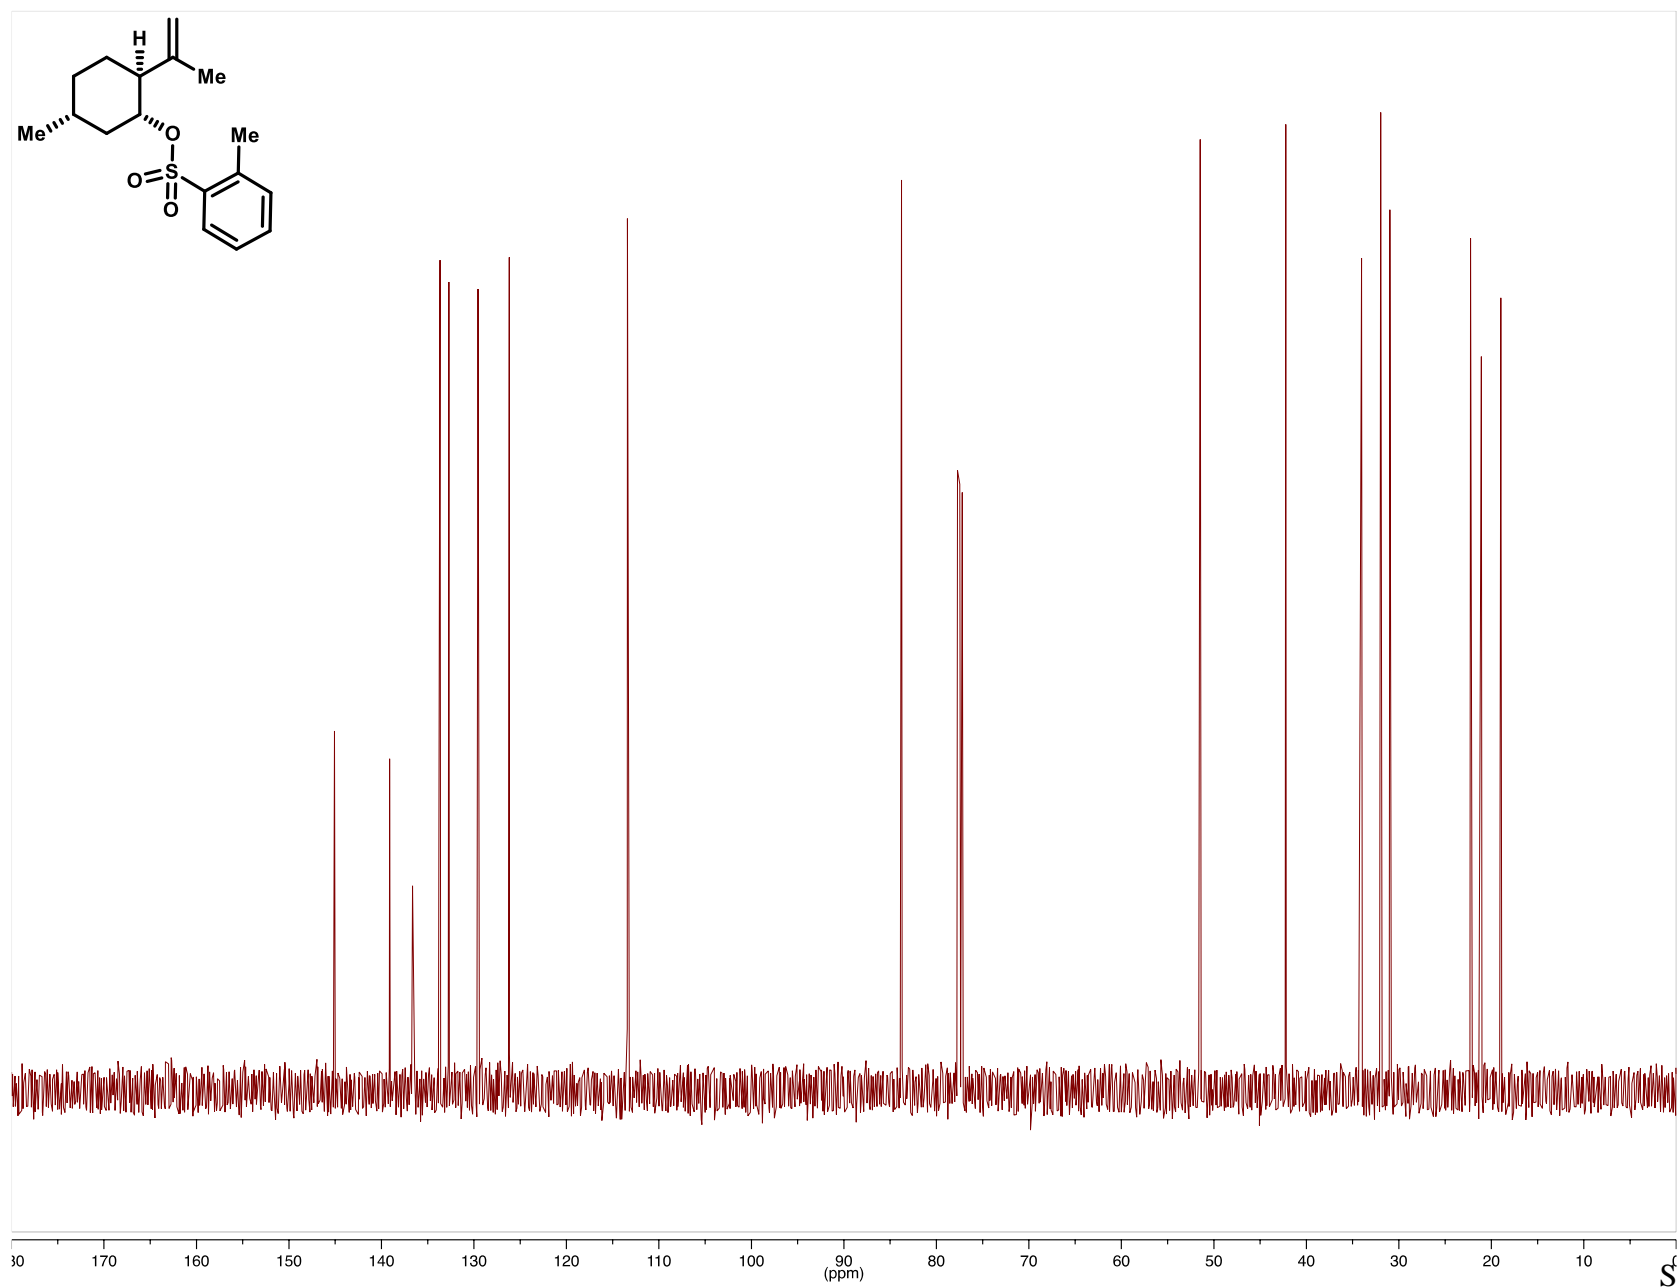

5a:  $^1\text{H}$ -NMR

SCNMR156404.1.fid  
H-1 Routine, CP-DCH, AVIII HD-600

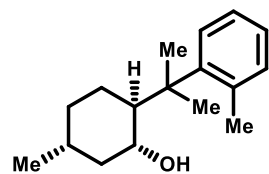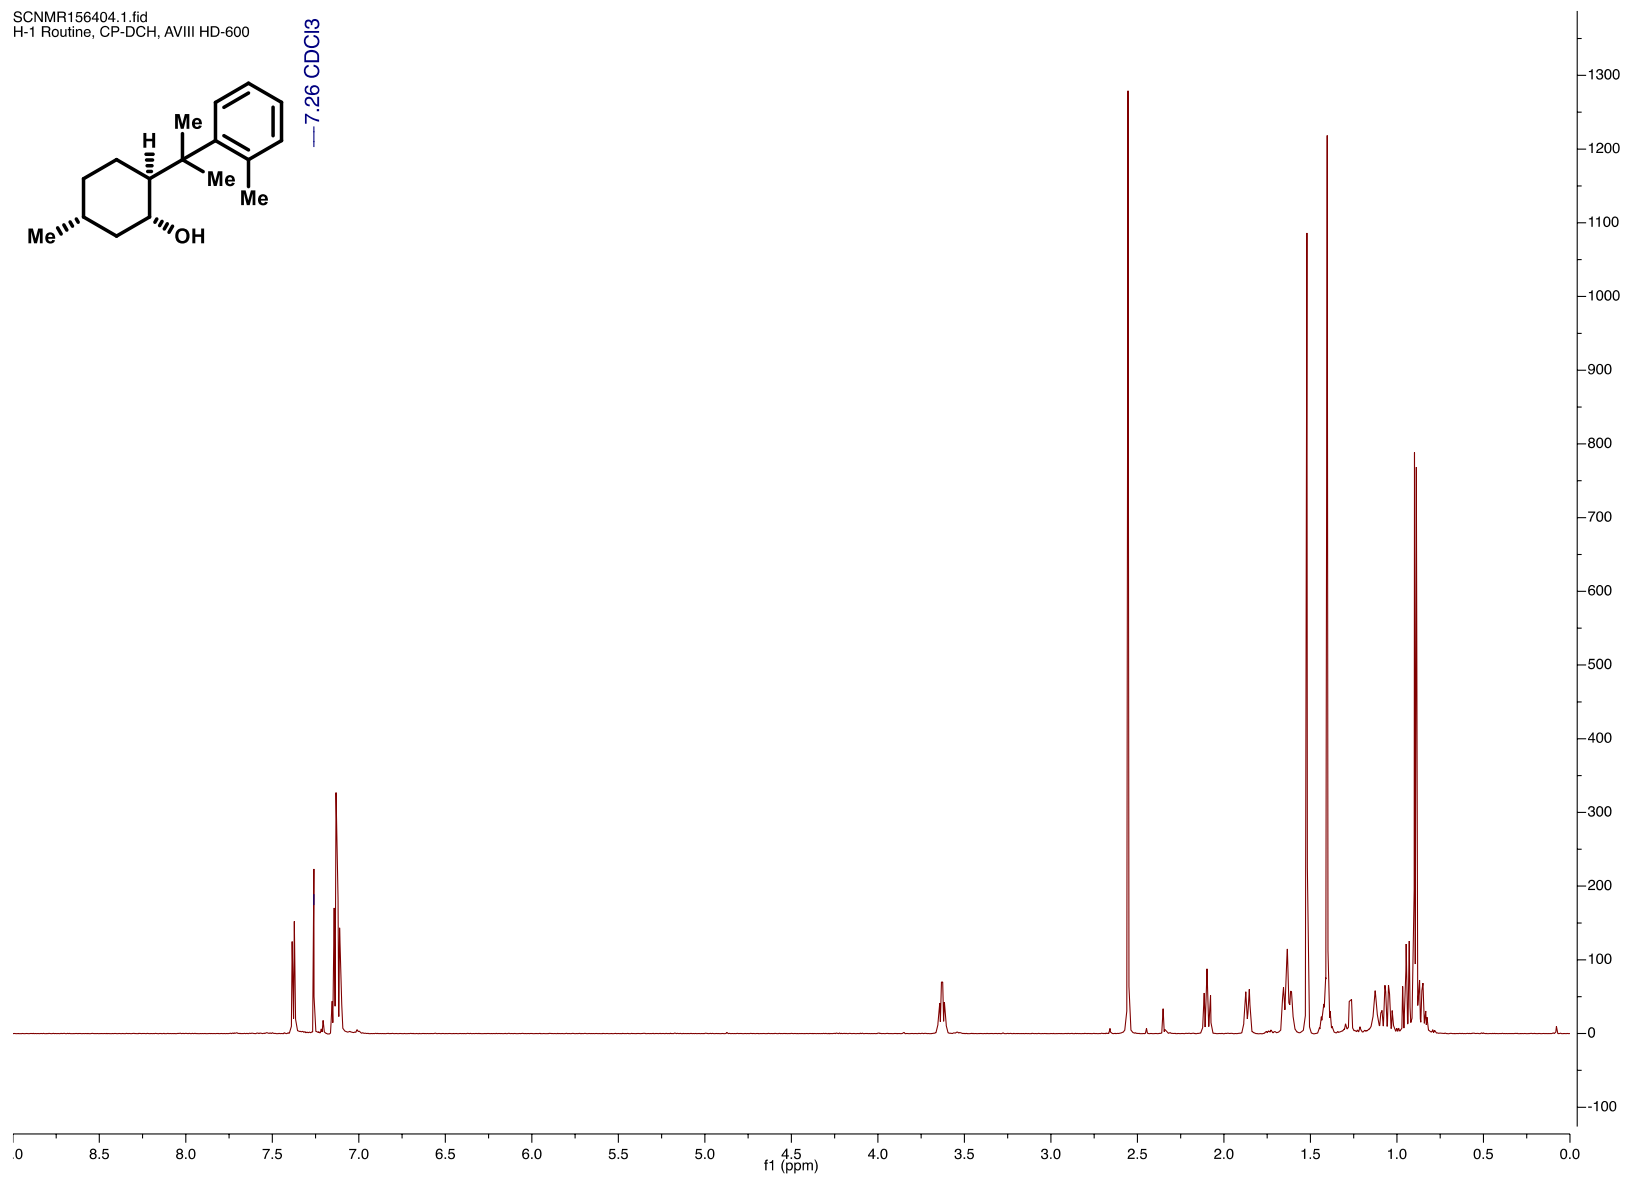



5a:  $^{13}\text{C}$ -NMR

SCNMR156404.2.fid  
C-13 Routine 1D, CPDCH CryoProbe, AVIII-600

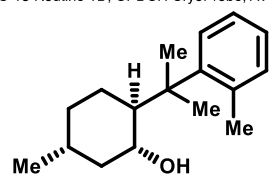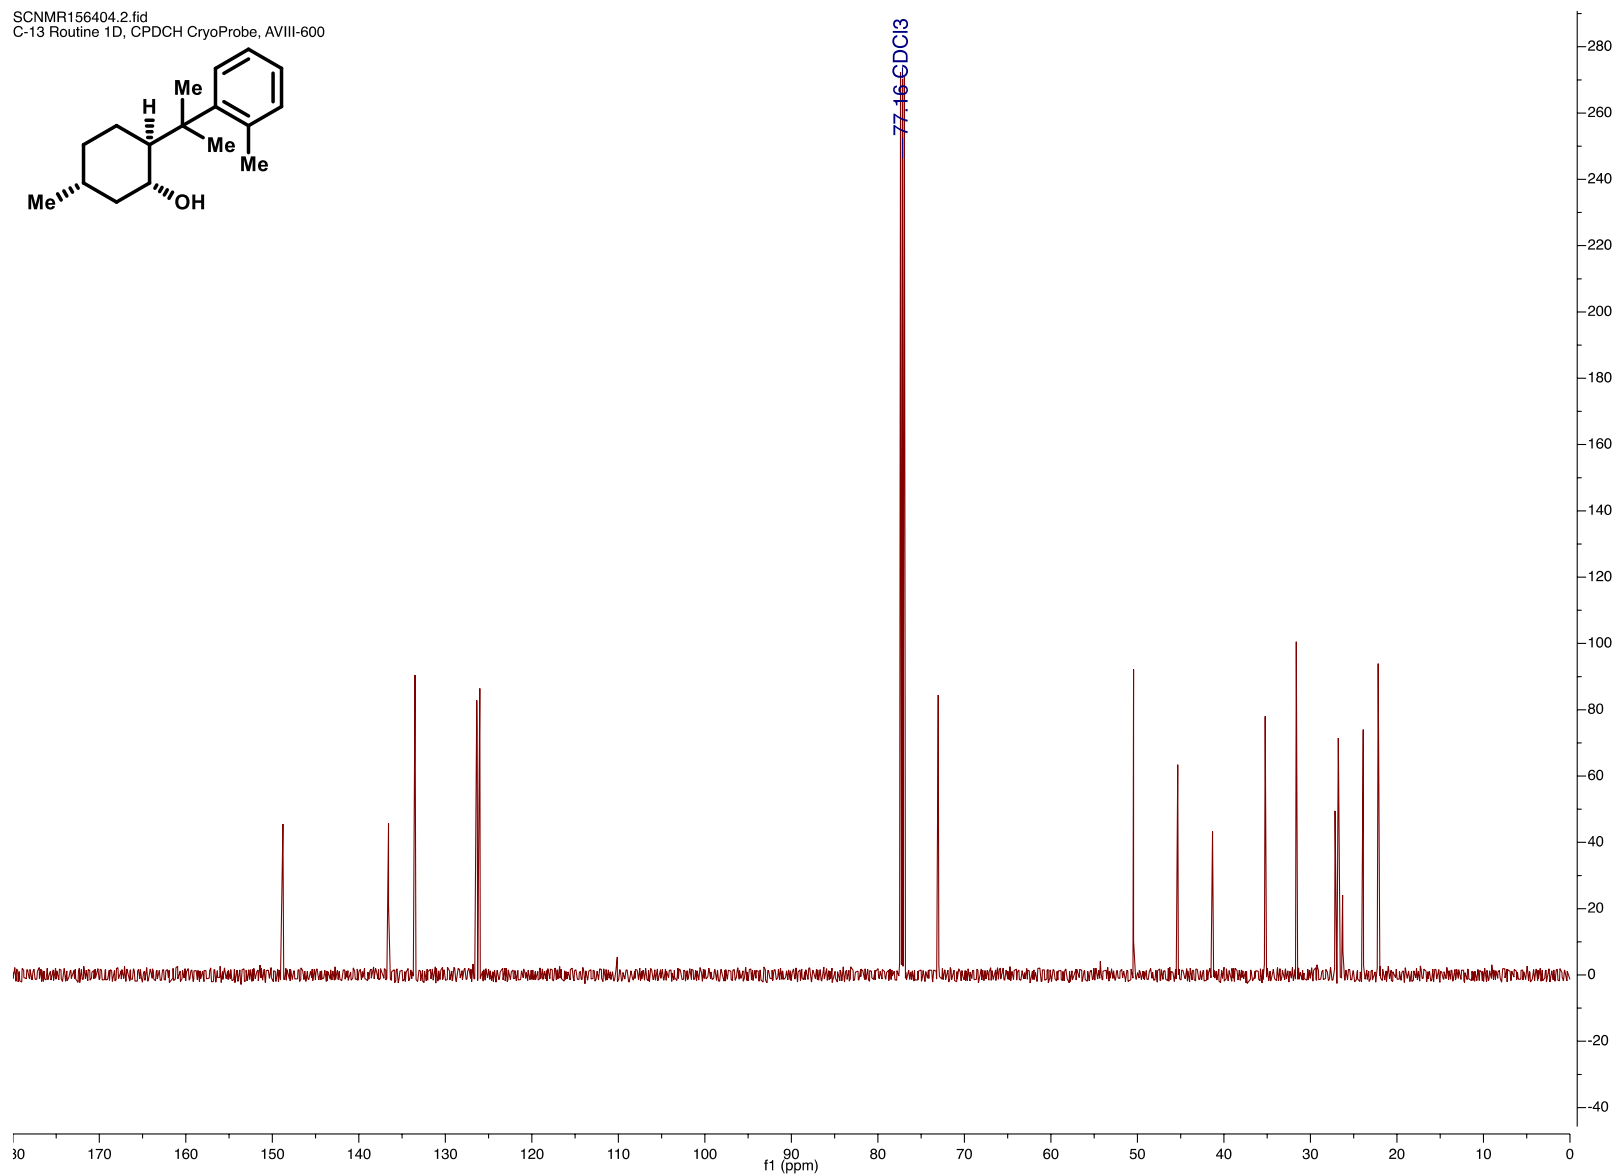

SCNMR156404.2.fid  
C-13 Routine 1D, CPDCH CryoProbe, AVIII-600

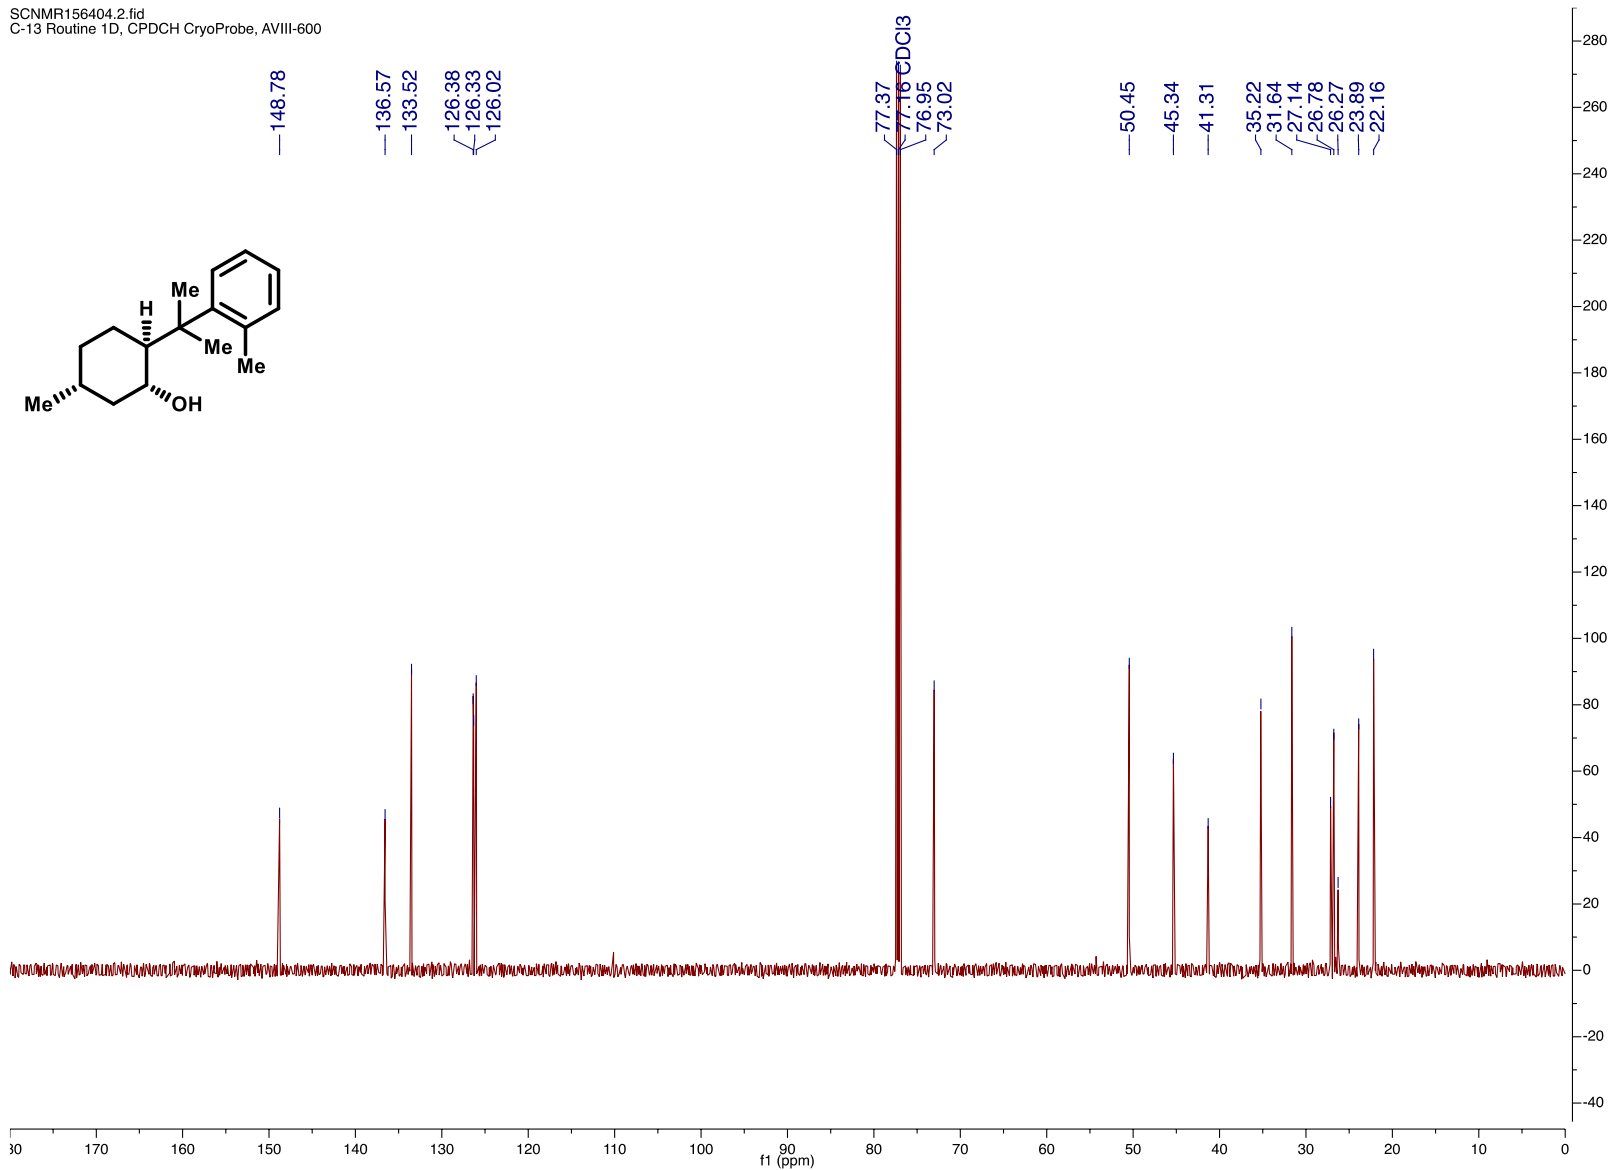



The chemical structure shows a cyclohexane ring substituted with a methyl group (Me) at the 4-position, a prop-1-en-1-yl group at the 1-position, and a sulfonyl group (SO<sub>2</sub>) at the 1-position. The sulfonyl group is further substituted with a 4-methylphenyl group. The stereochemistry is indicated with wedges and dashes.

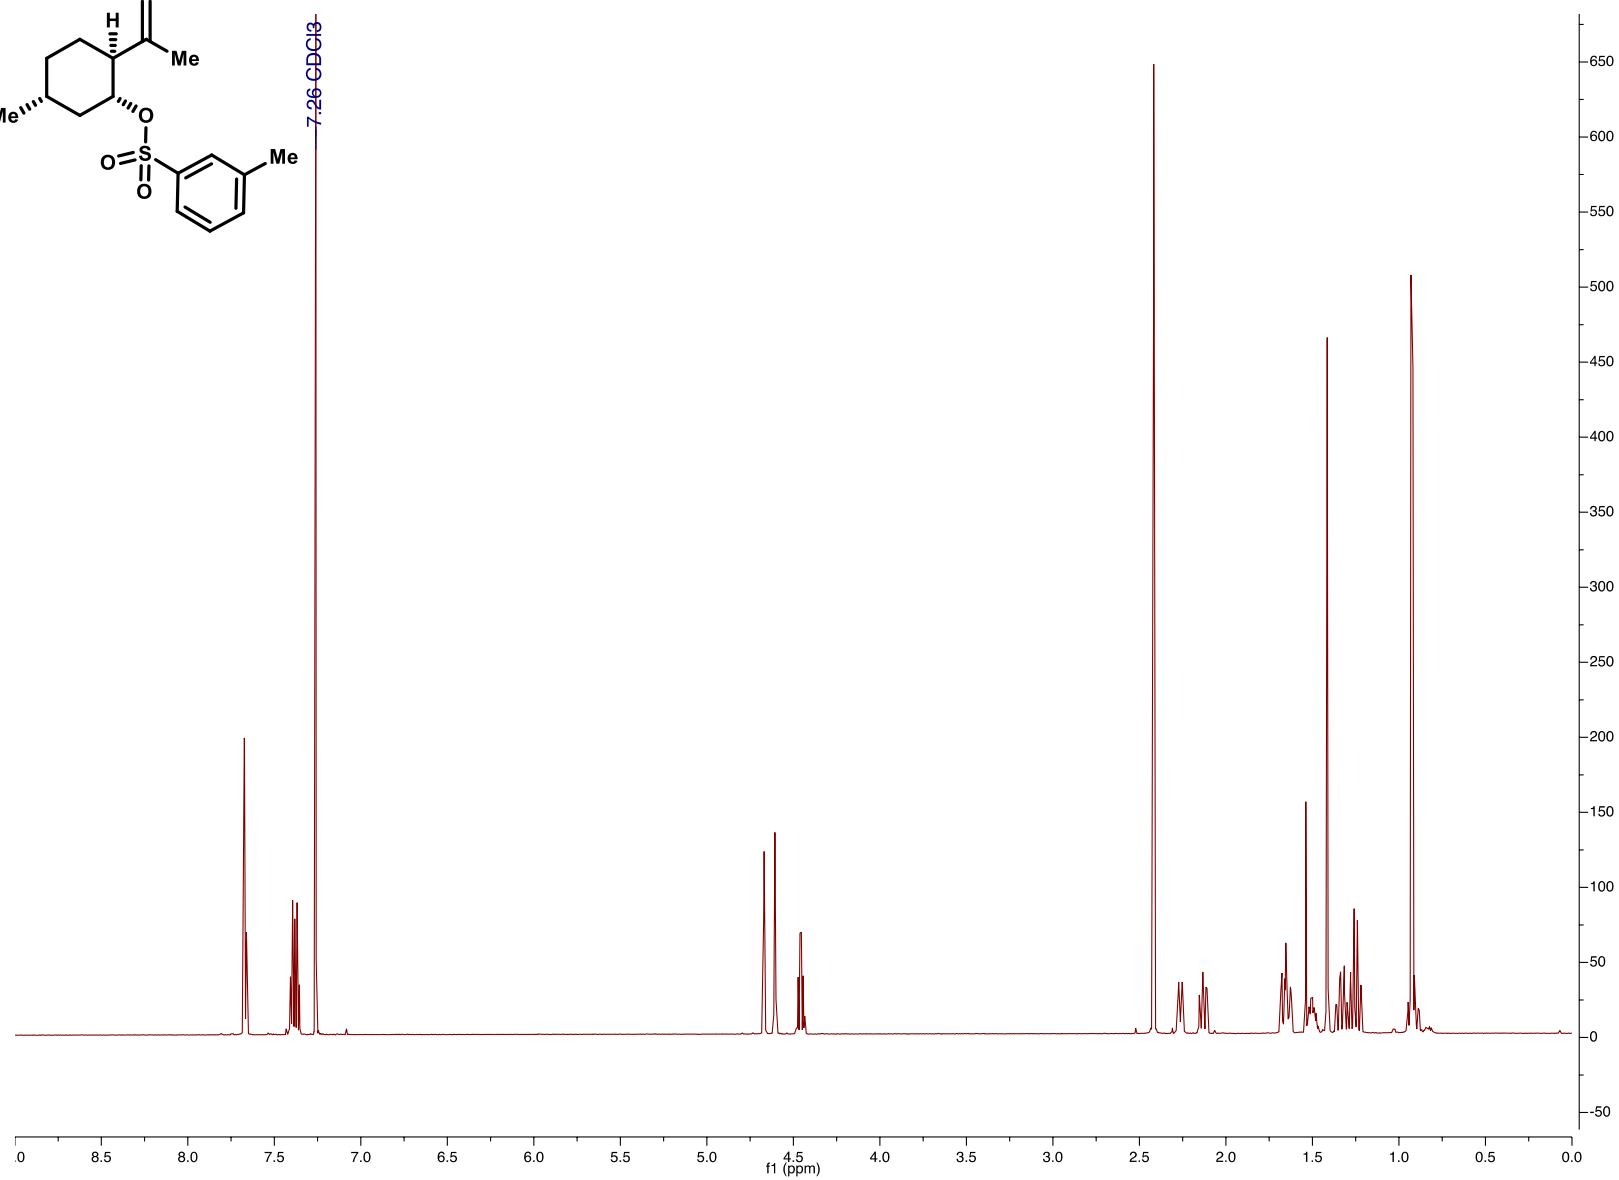

SI-04:  $^{13}\text{C}$ -NMR

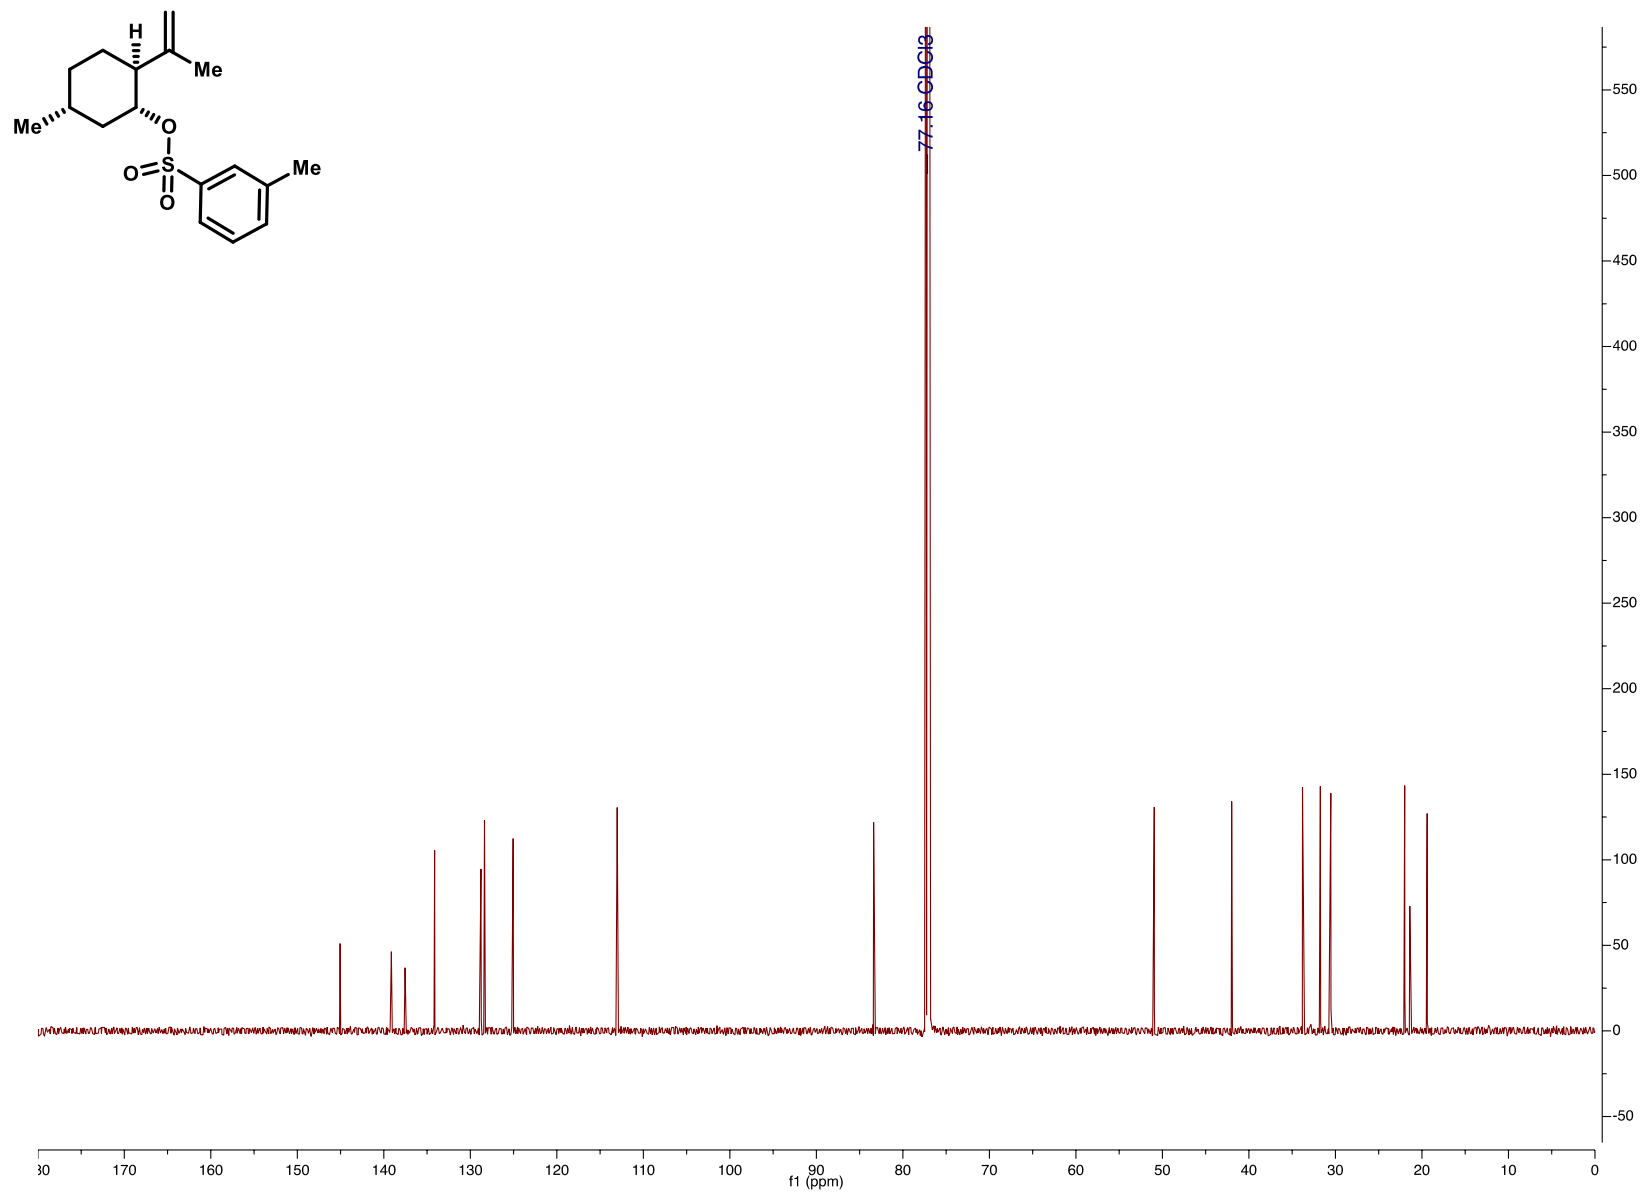

5b: <sup>1</sup>H-NMR

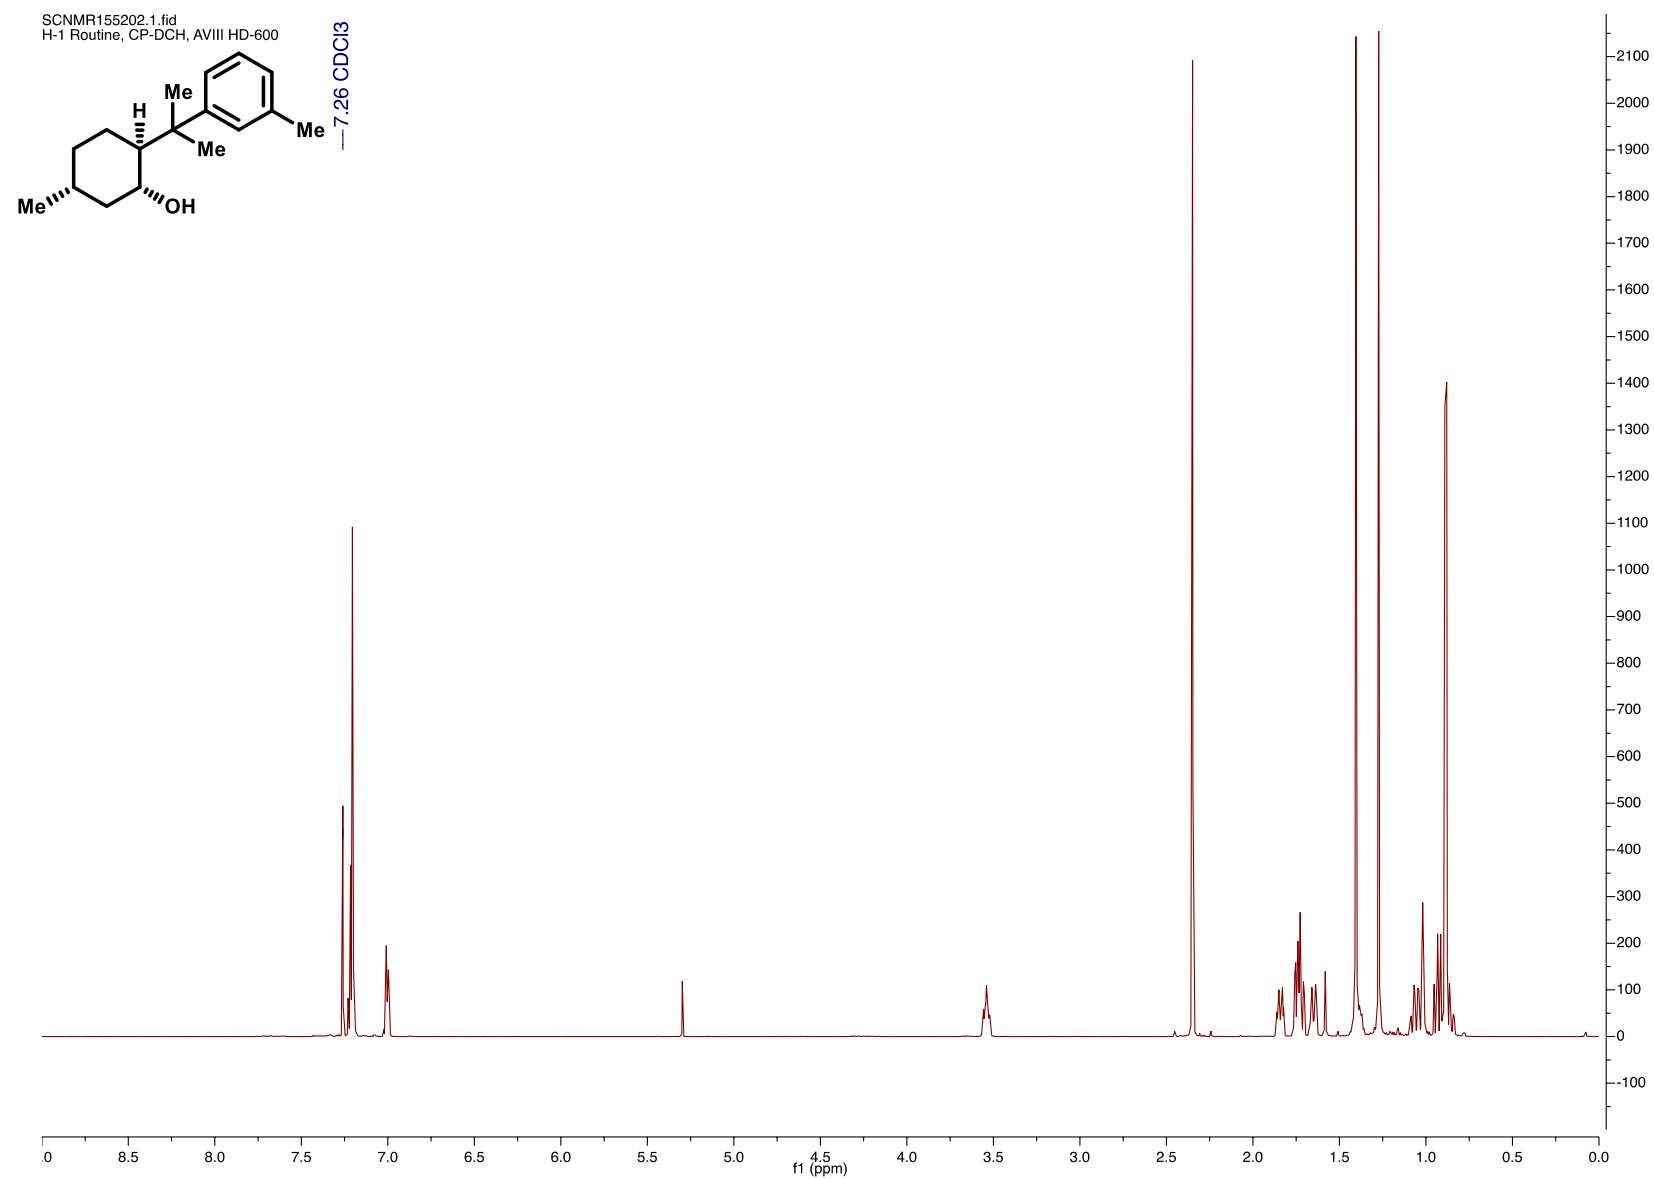

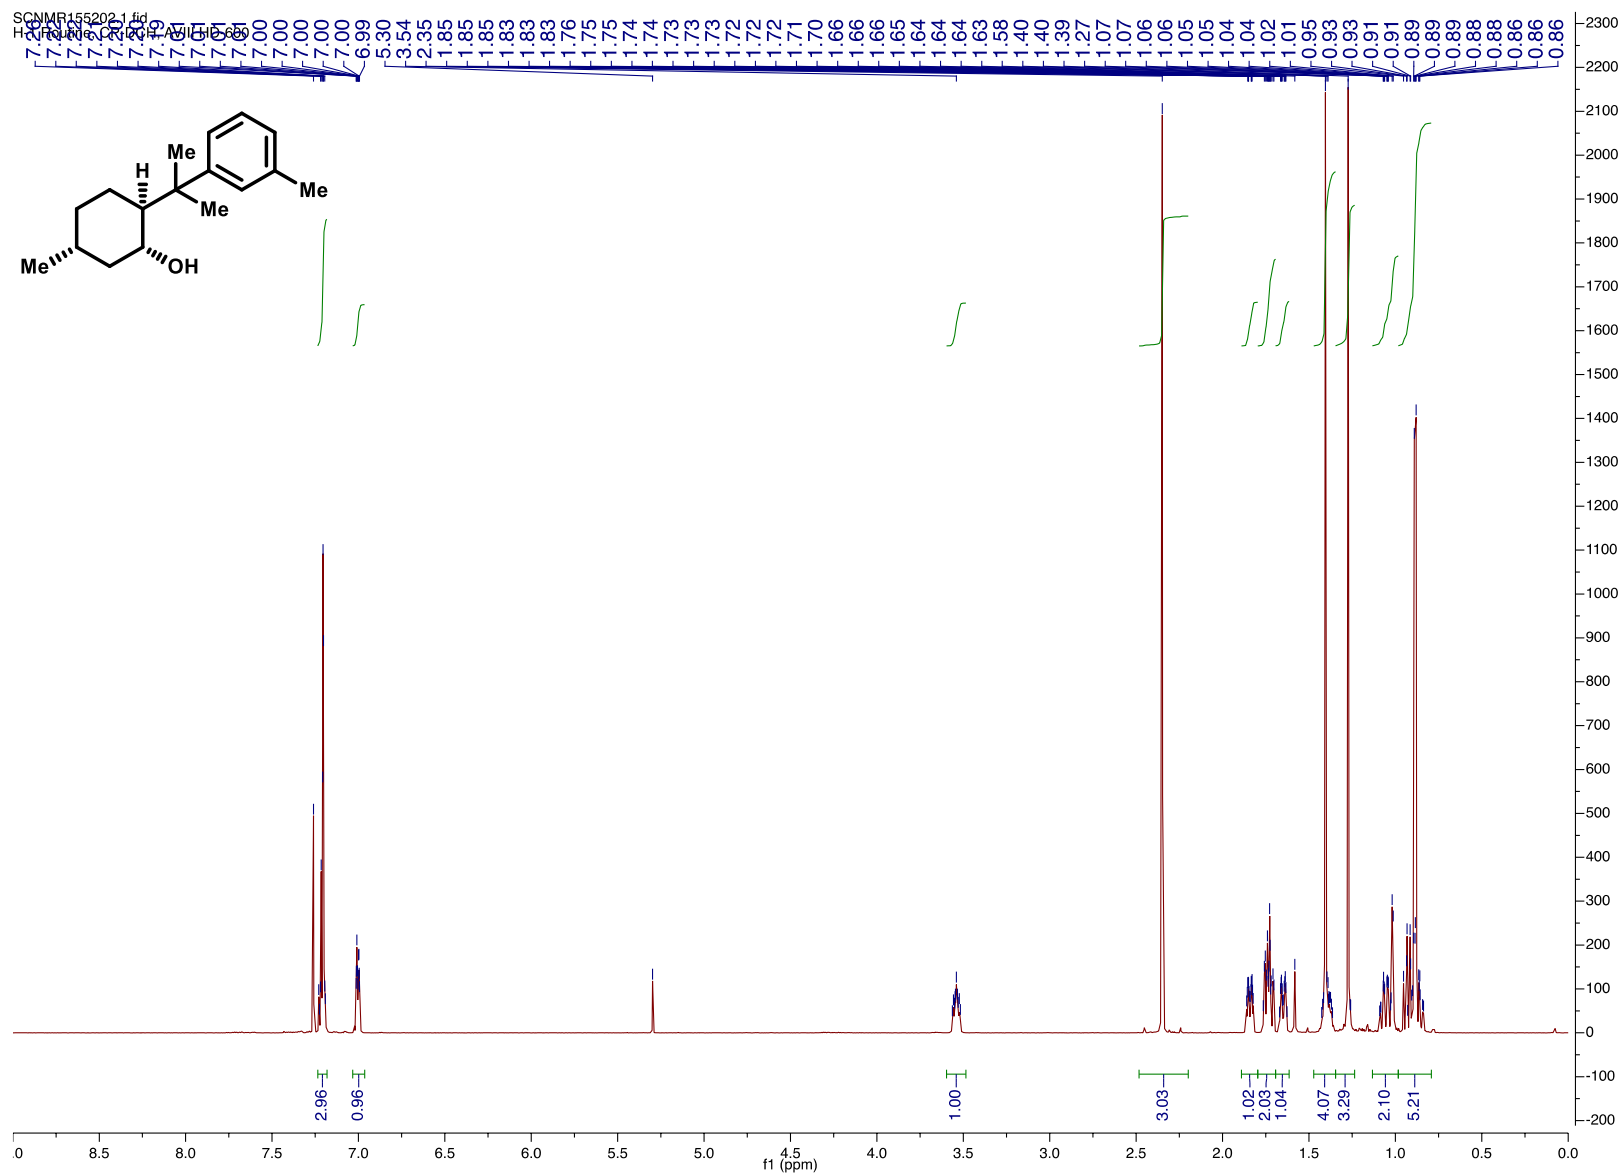

5b:  $^{13}\text{C}$ -NMR

SCNMR155202.2.fid  
C-13 Routine 1D, CPDCH CryoProbe, AVIII-600

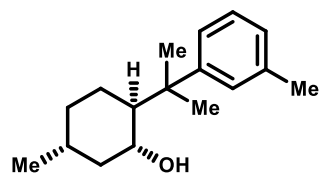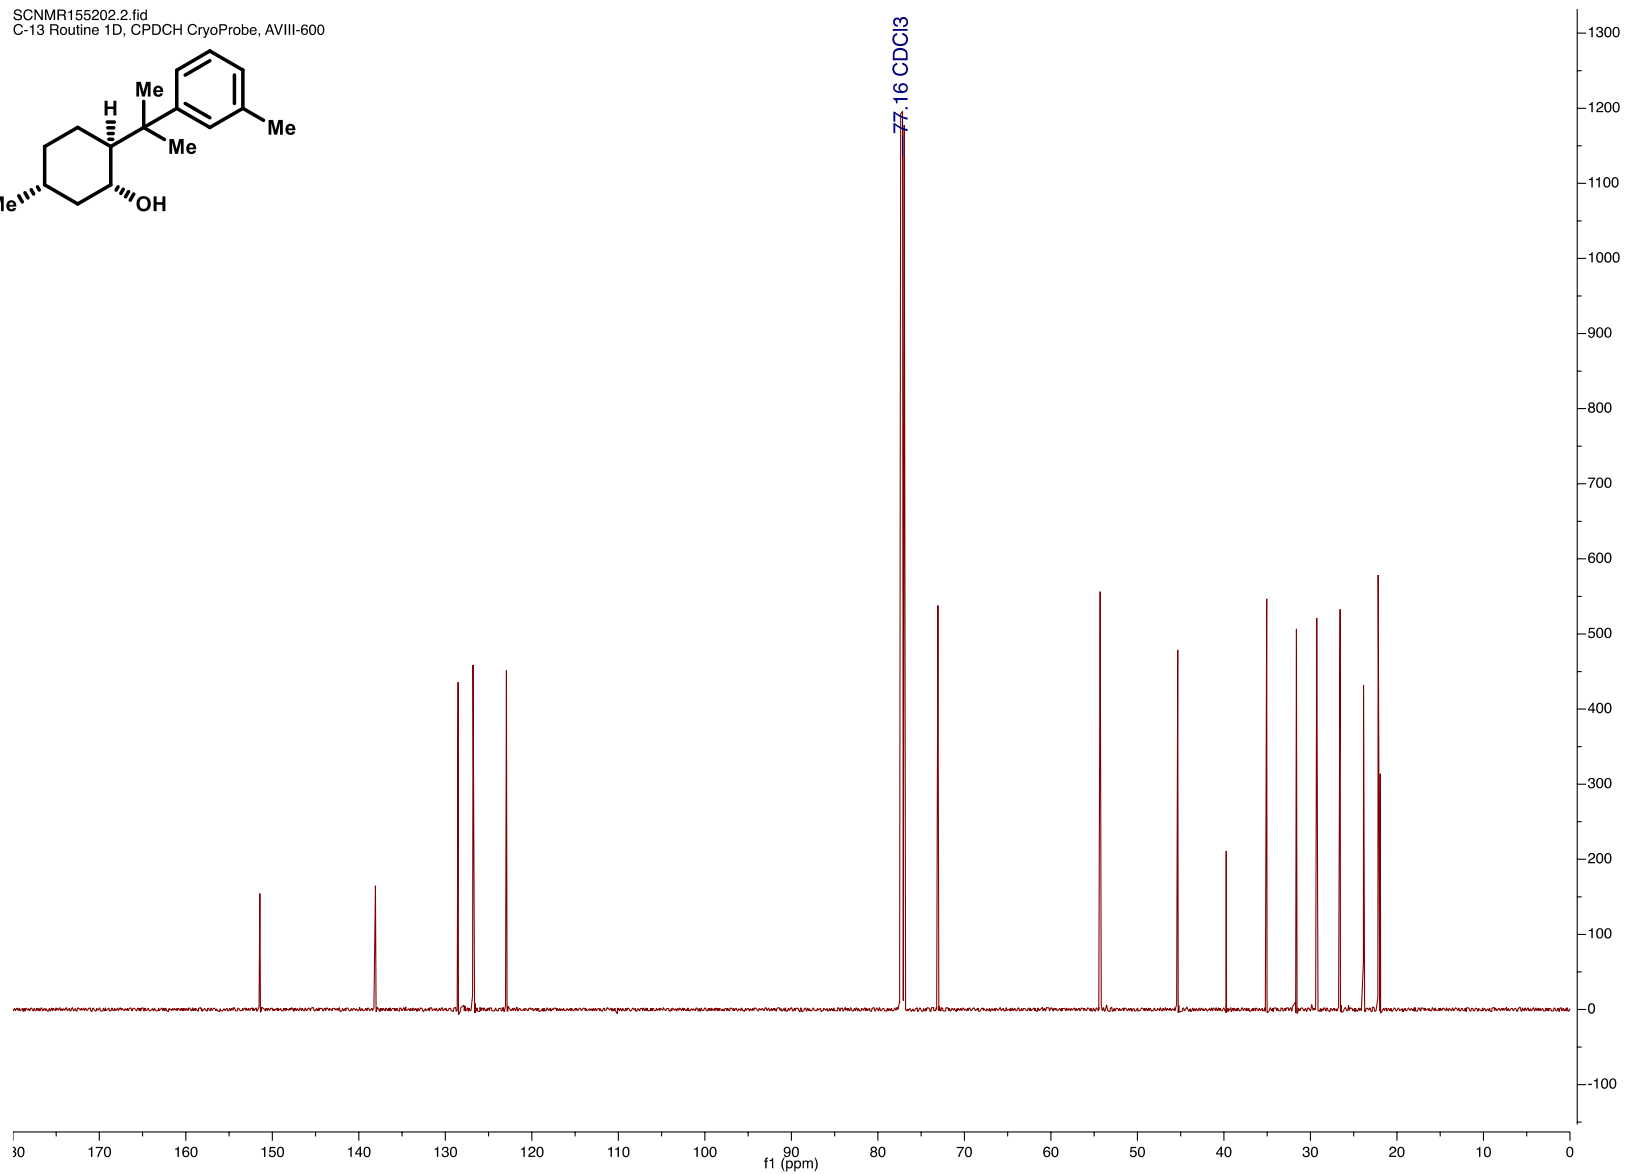

SCNMR155202.2.fid  
C-13 Routine 1D, CPDCH CryoProbe, AVIII-600

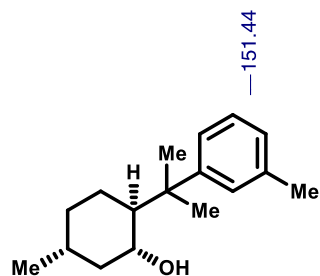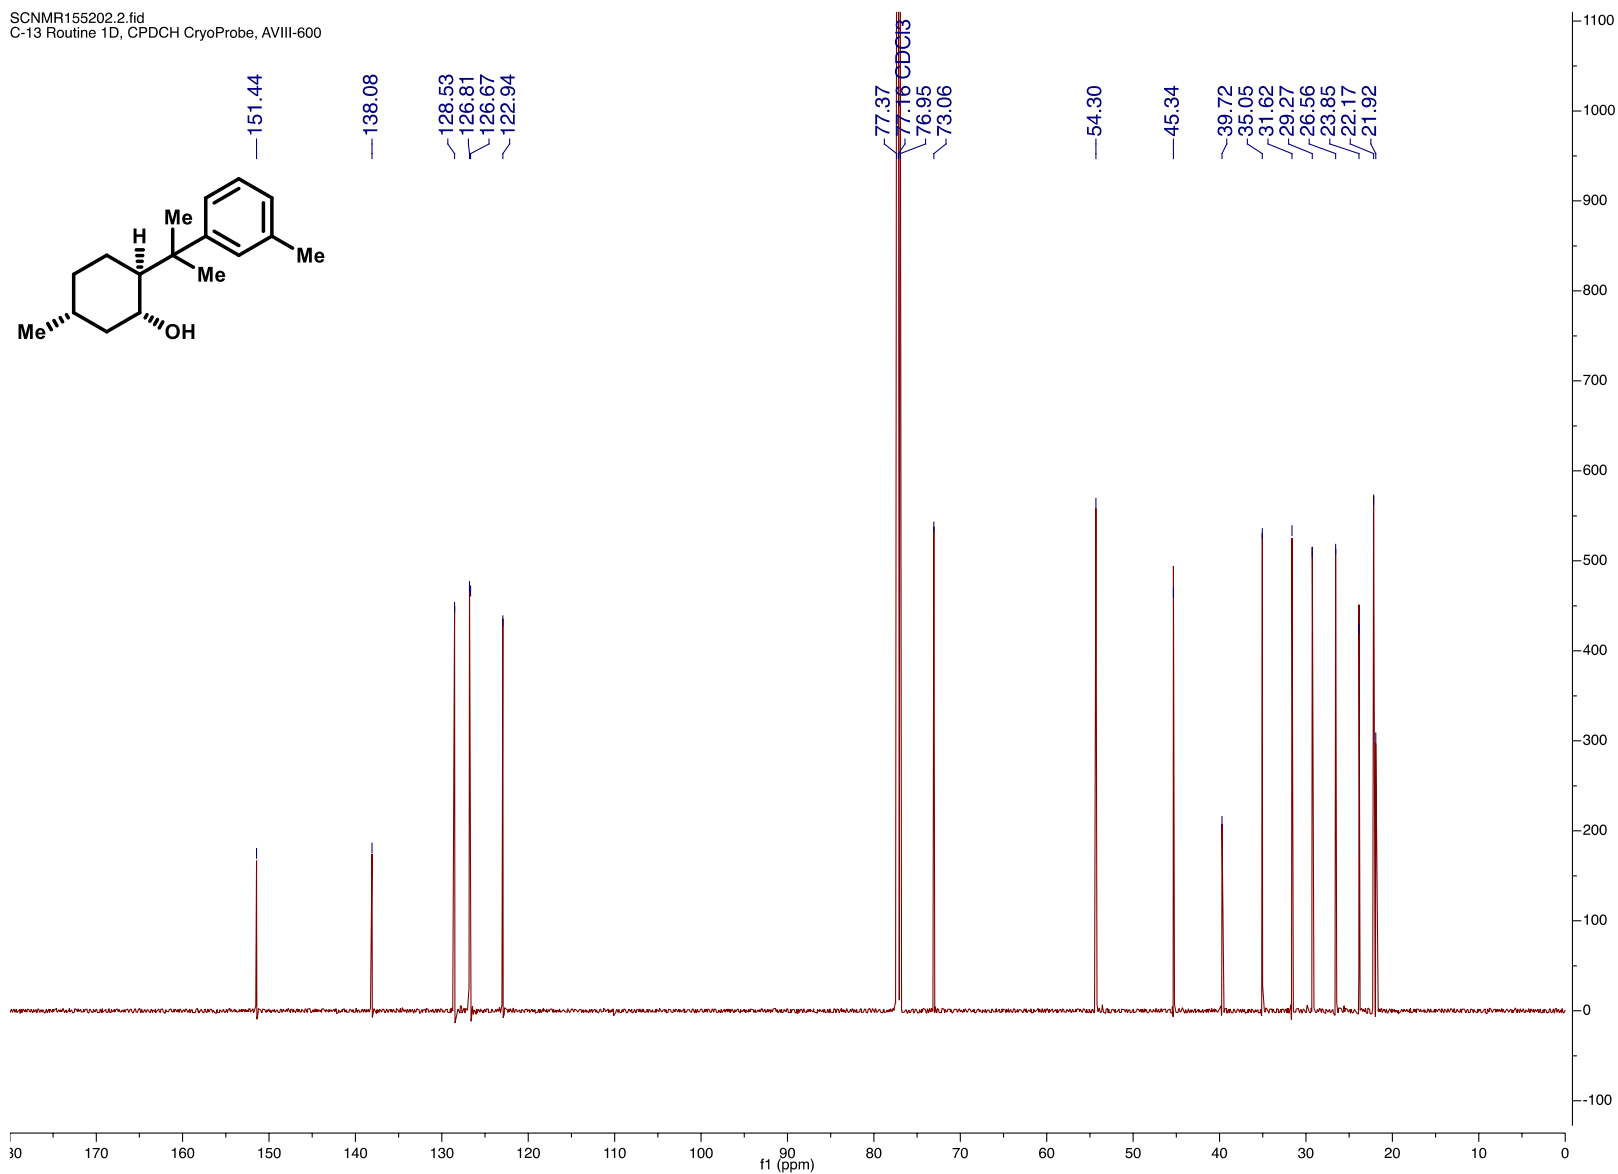

SI-05: <sup>1</sup>H-NMR

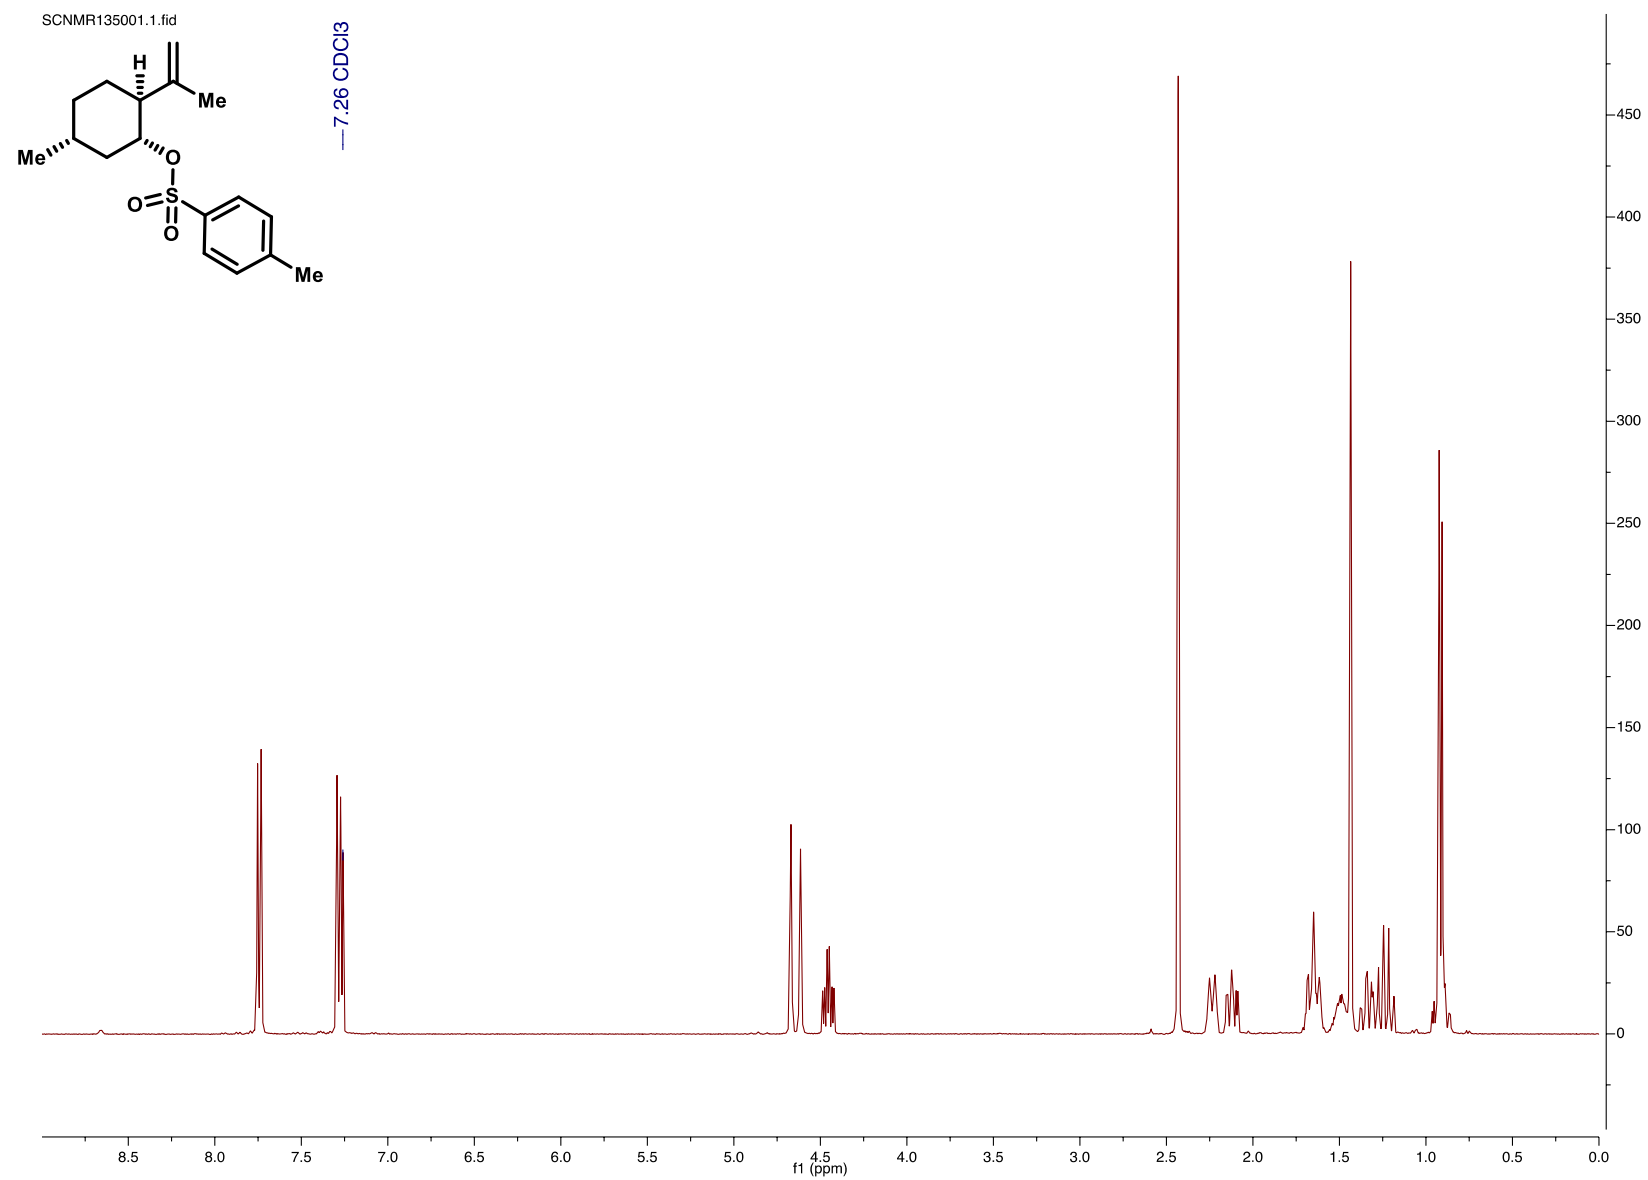

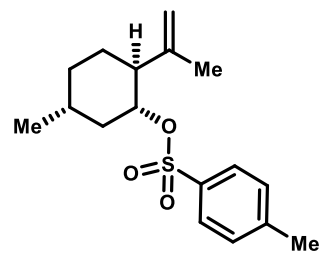



SI-05:  $^{13}\text{C}$ -NMR

SCNMR135001.2.fid  
C-13 Routine, using 45 degree flip angle. DPX-400

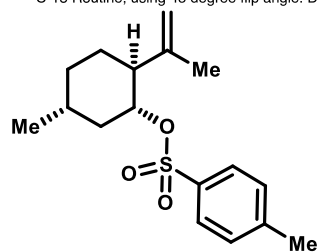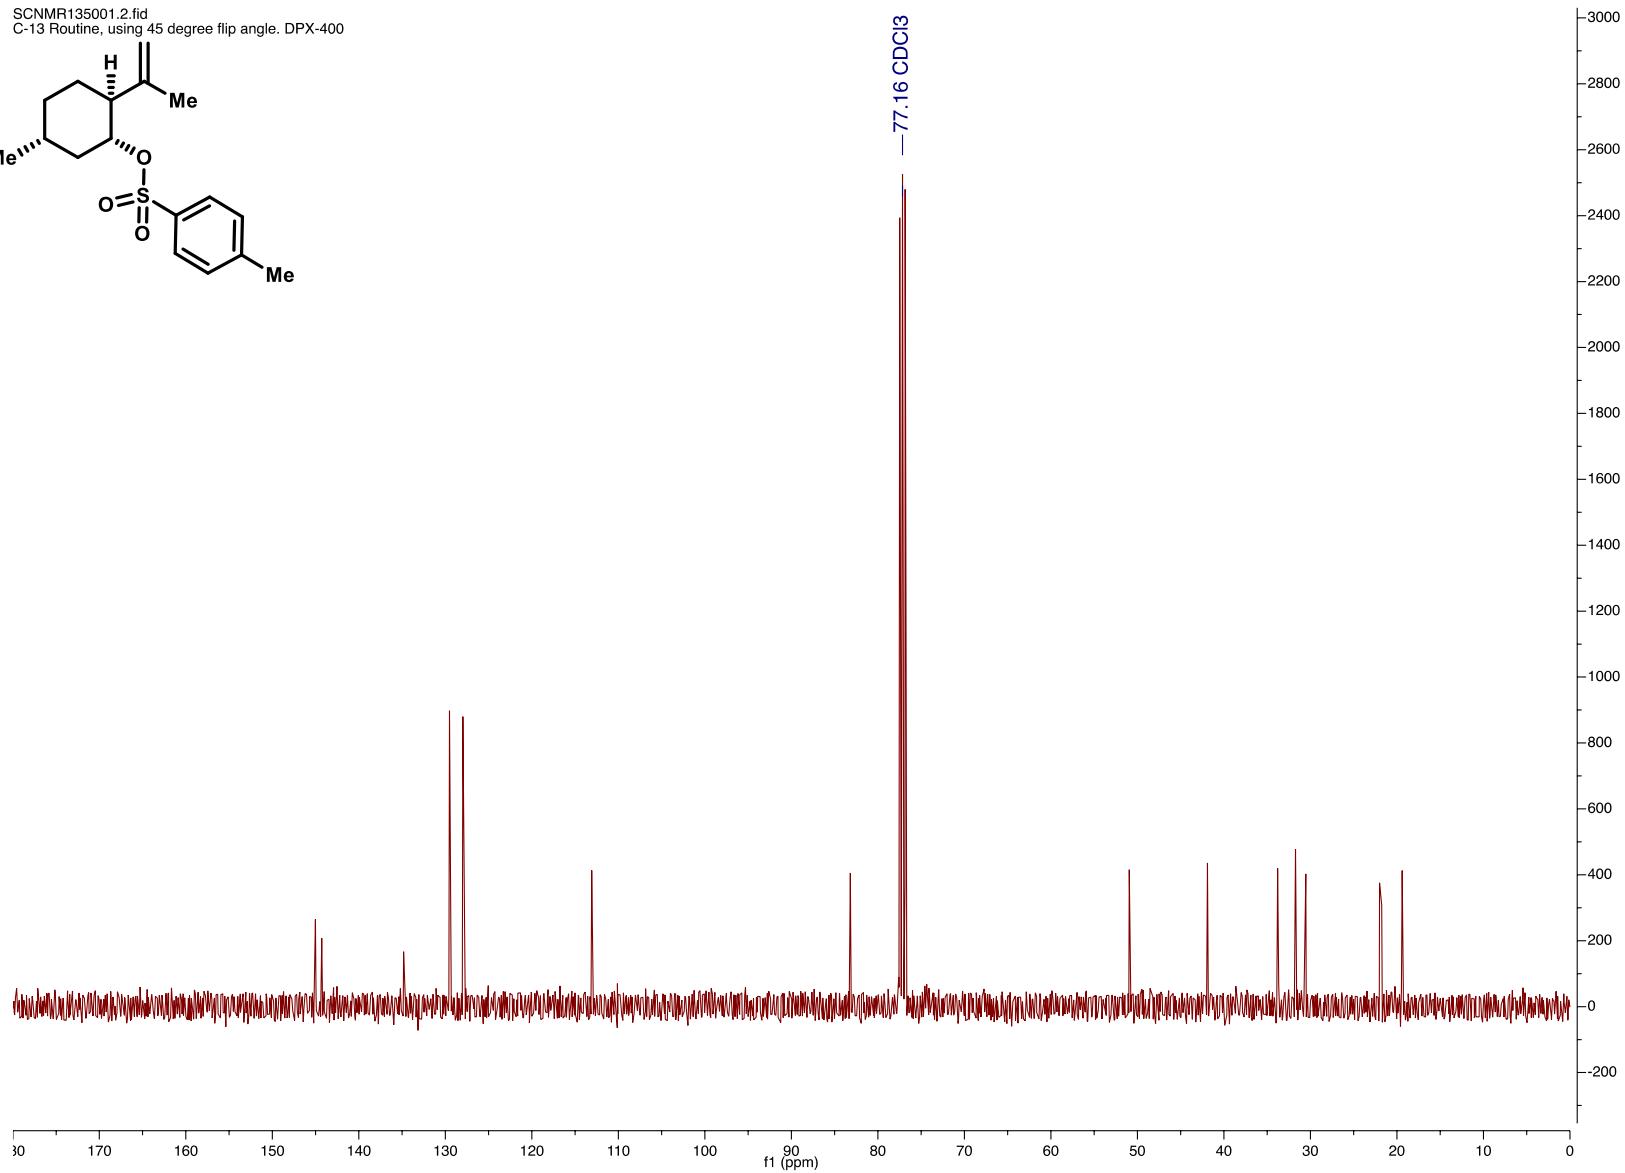

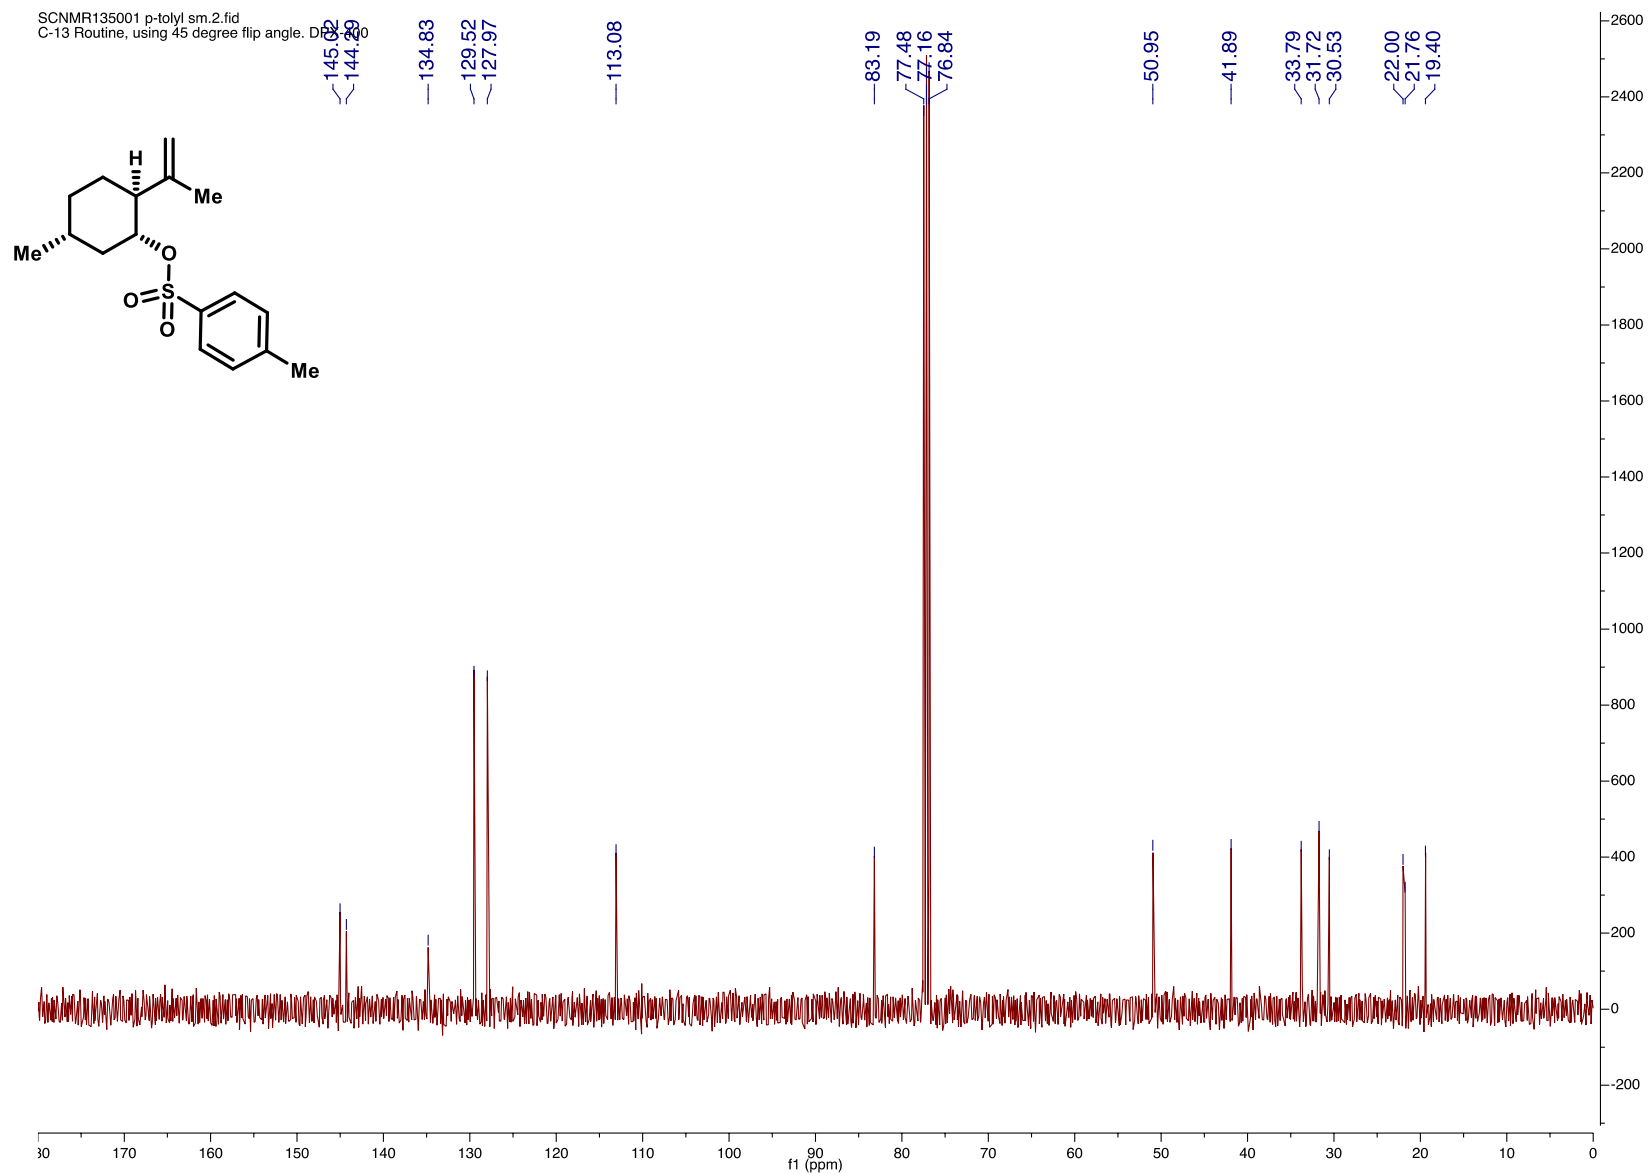

5c: <sup>1</sup>H-NMR

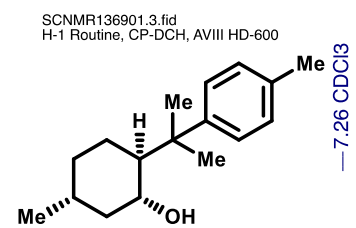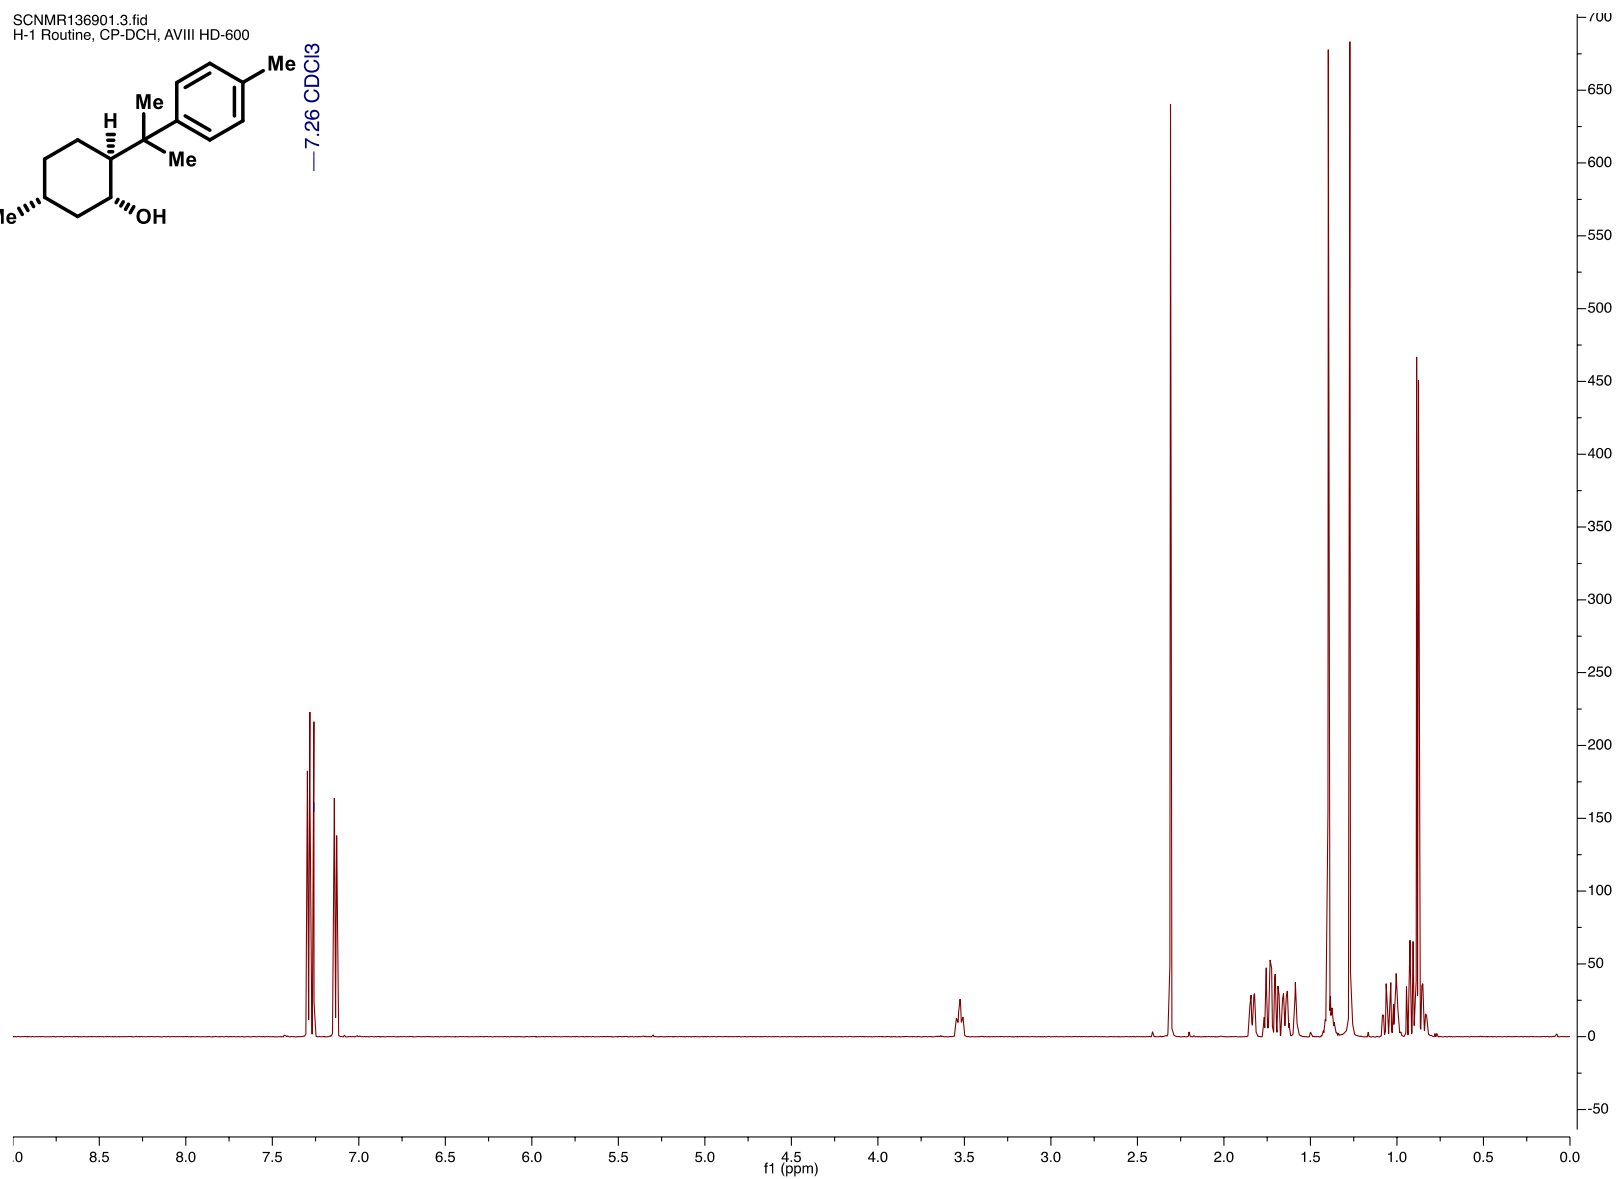

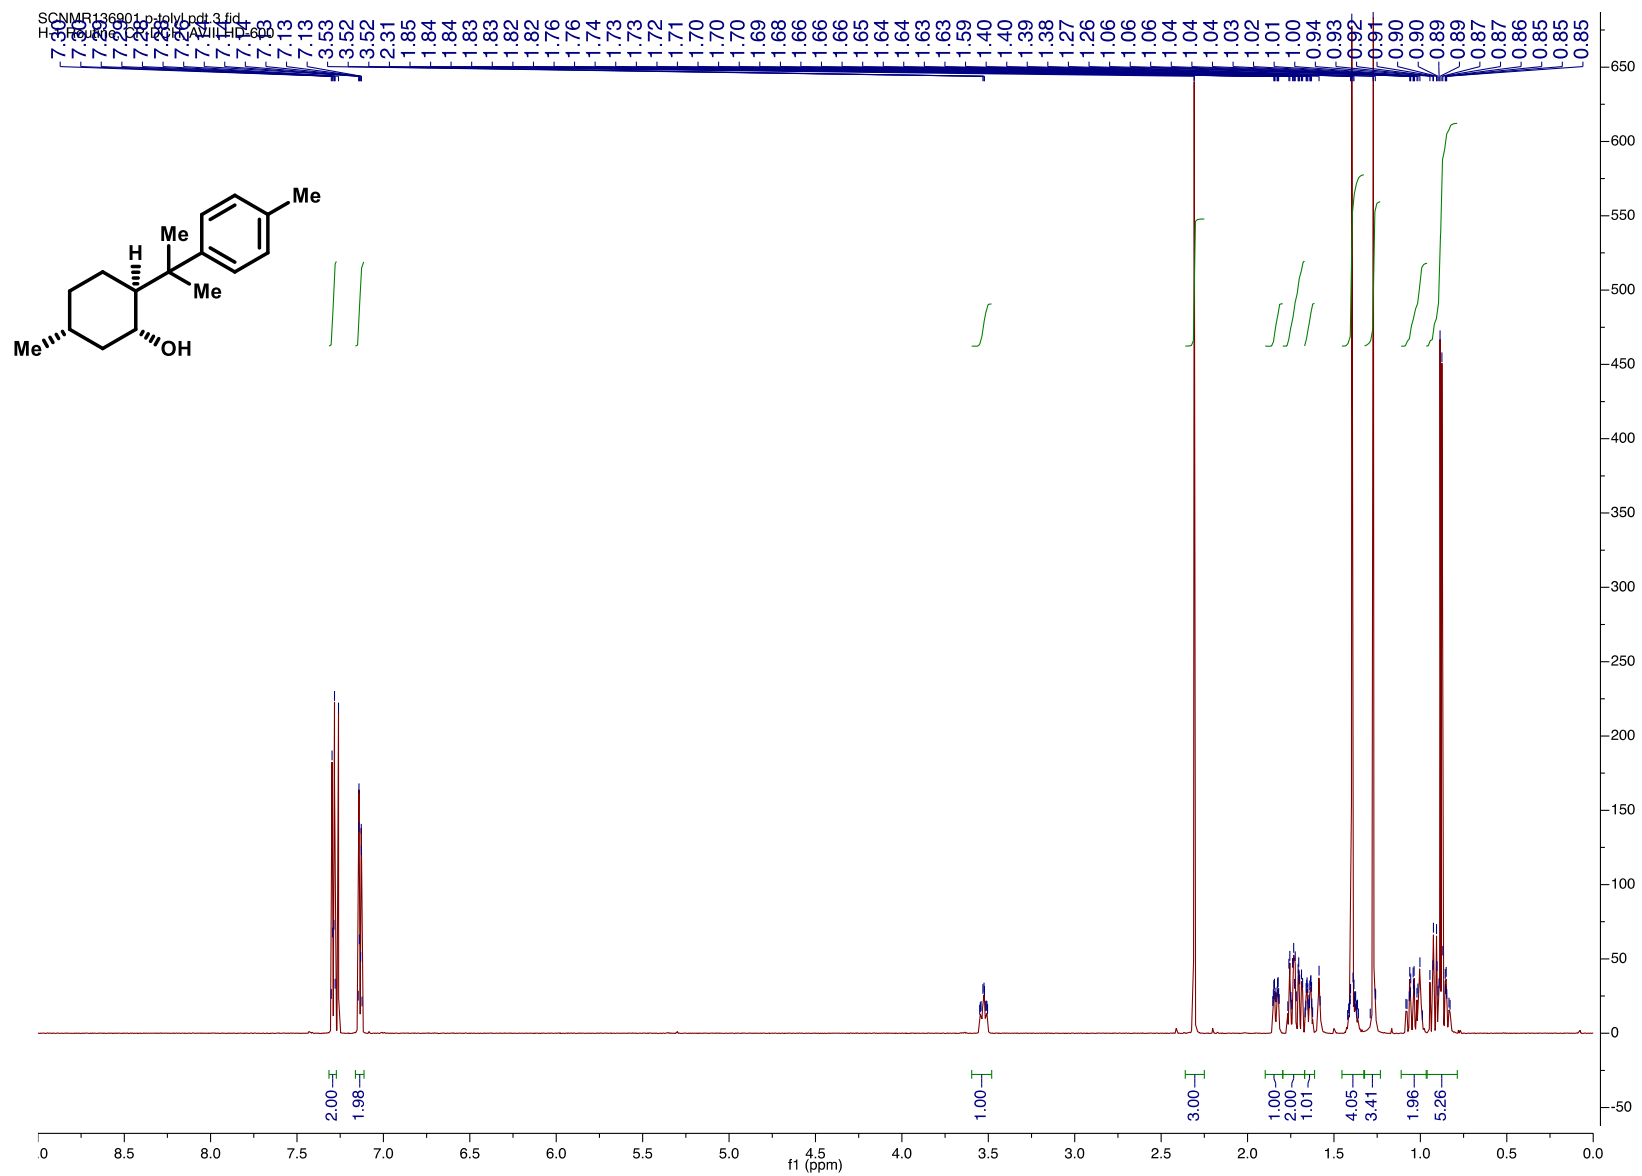

5c:  $^{13}\text{C}$ -NMR

SCNMR136901.4.fid  
C-13 Routine 1D, CPDCH CryoProbe, AVIII-600

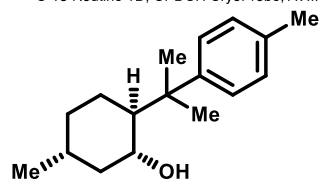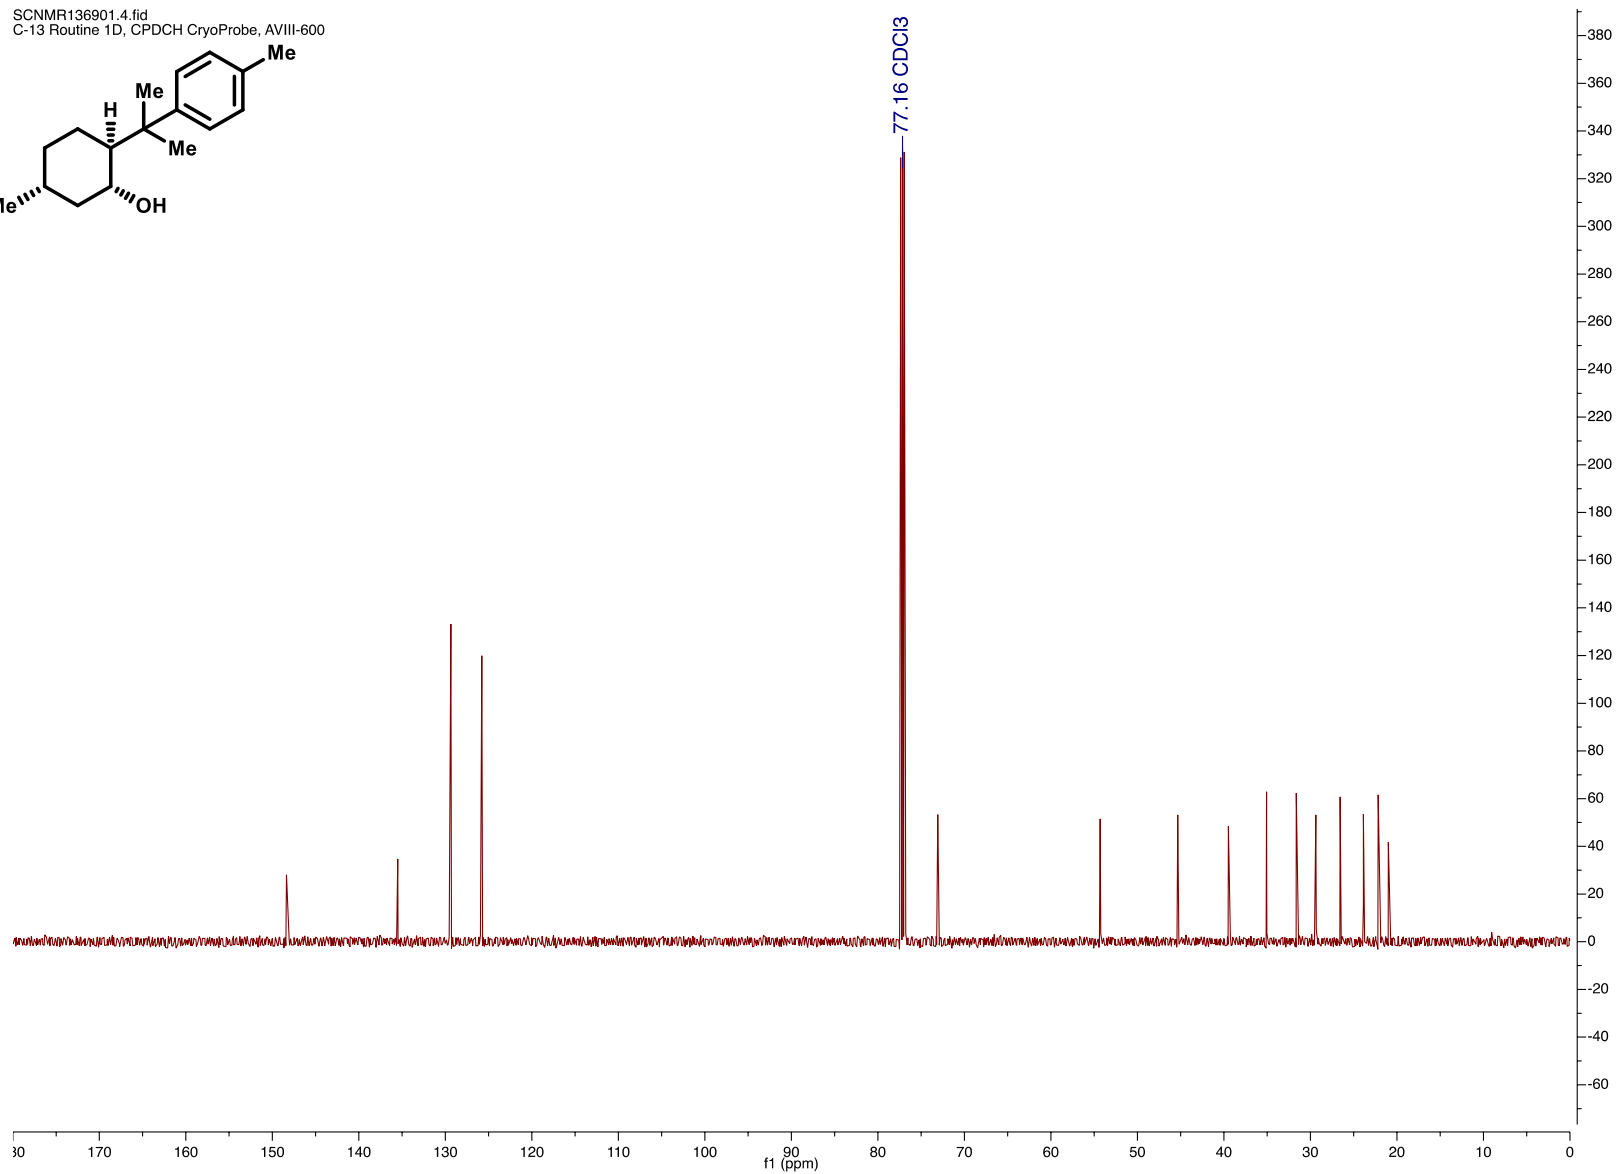

SCNMR136901 p-tolyl pdt.4.fid  
C-13 Routine 1D, CPDCH CryoProbe, AVIII-600

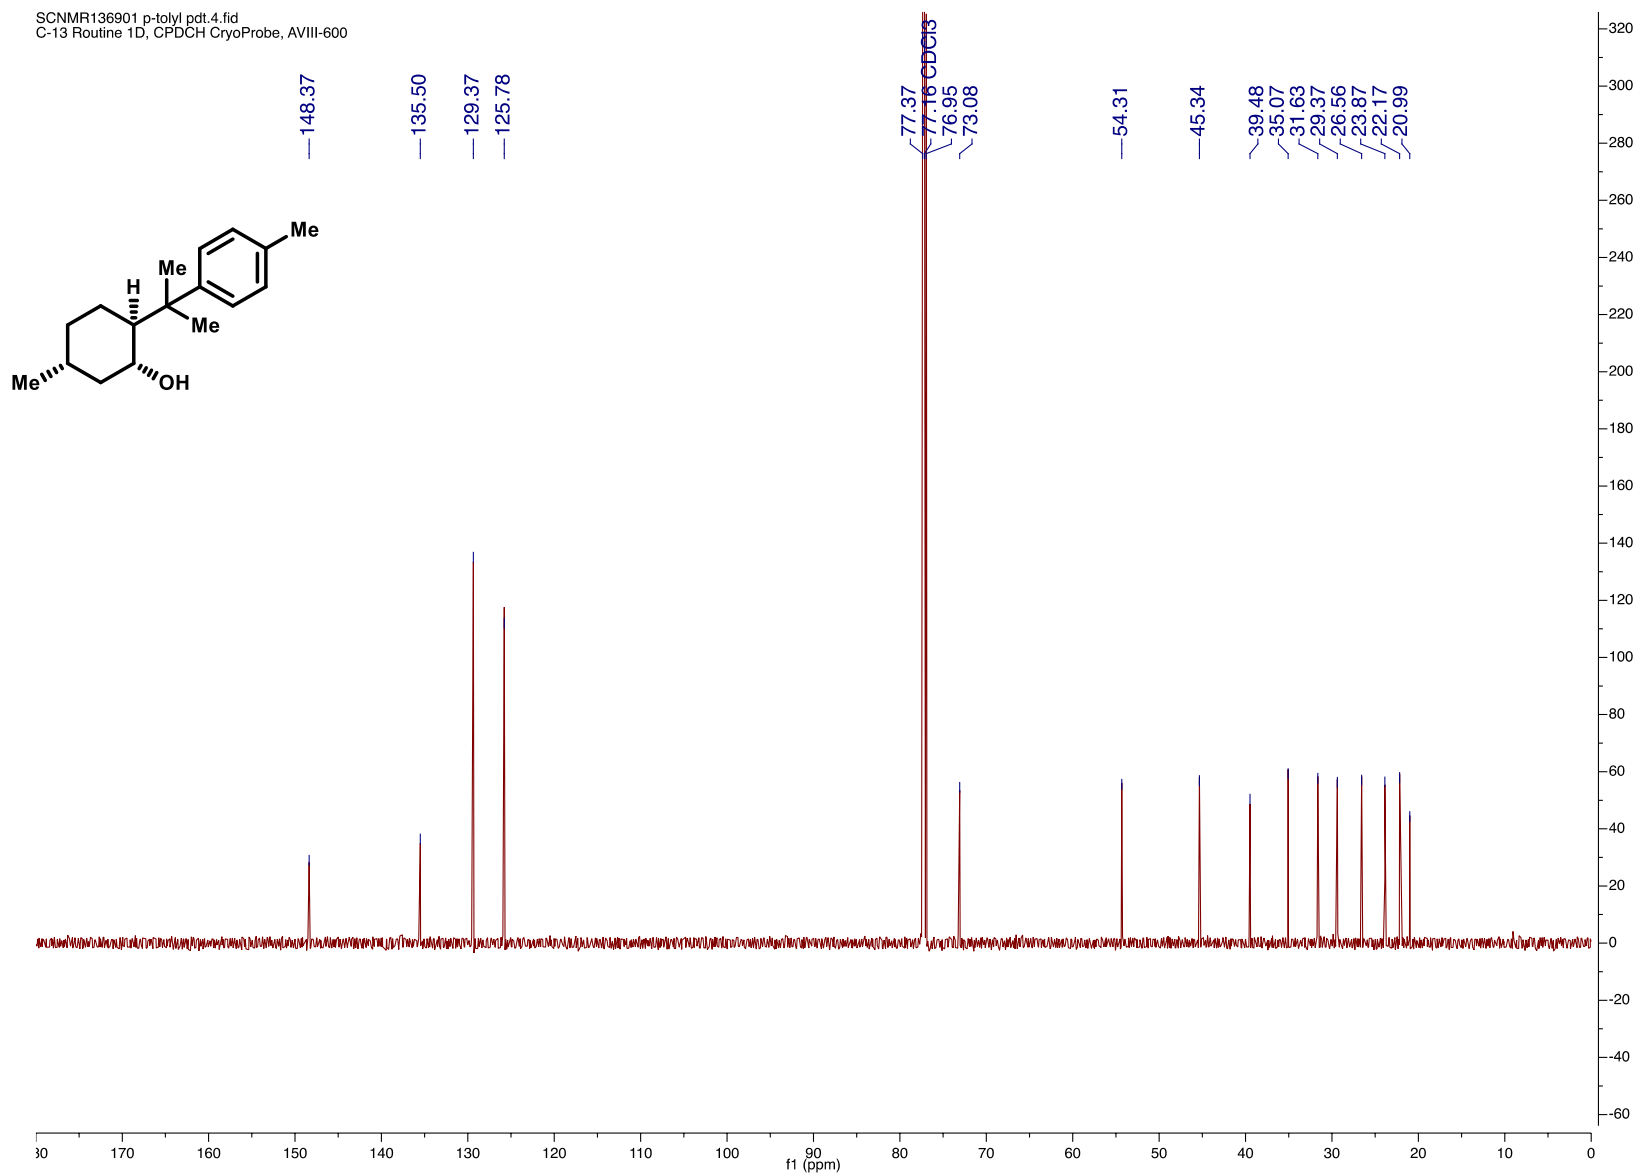

SI-06: <sup>1</sup>H-NMR

sgz1-178-col.2.fid  
H-1 Routine, DRX-500, BBO Probe

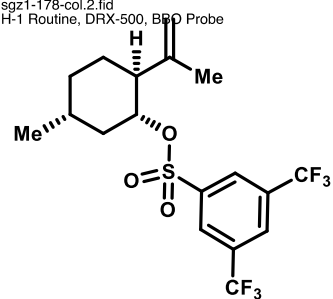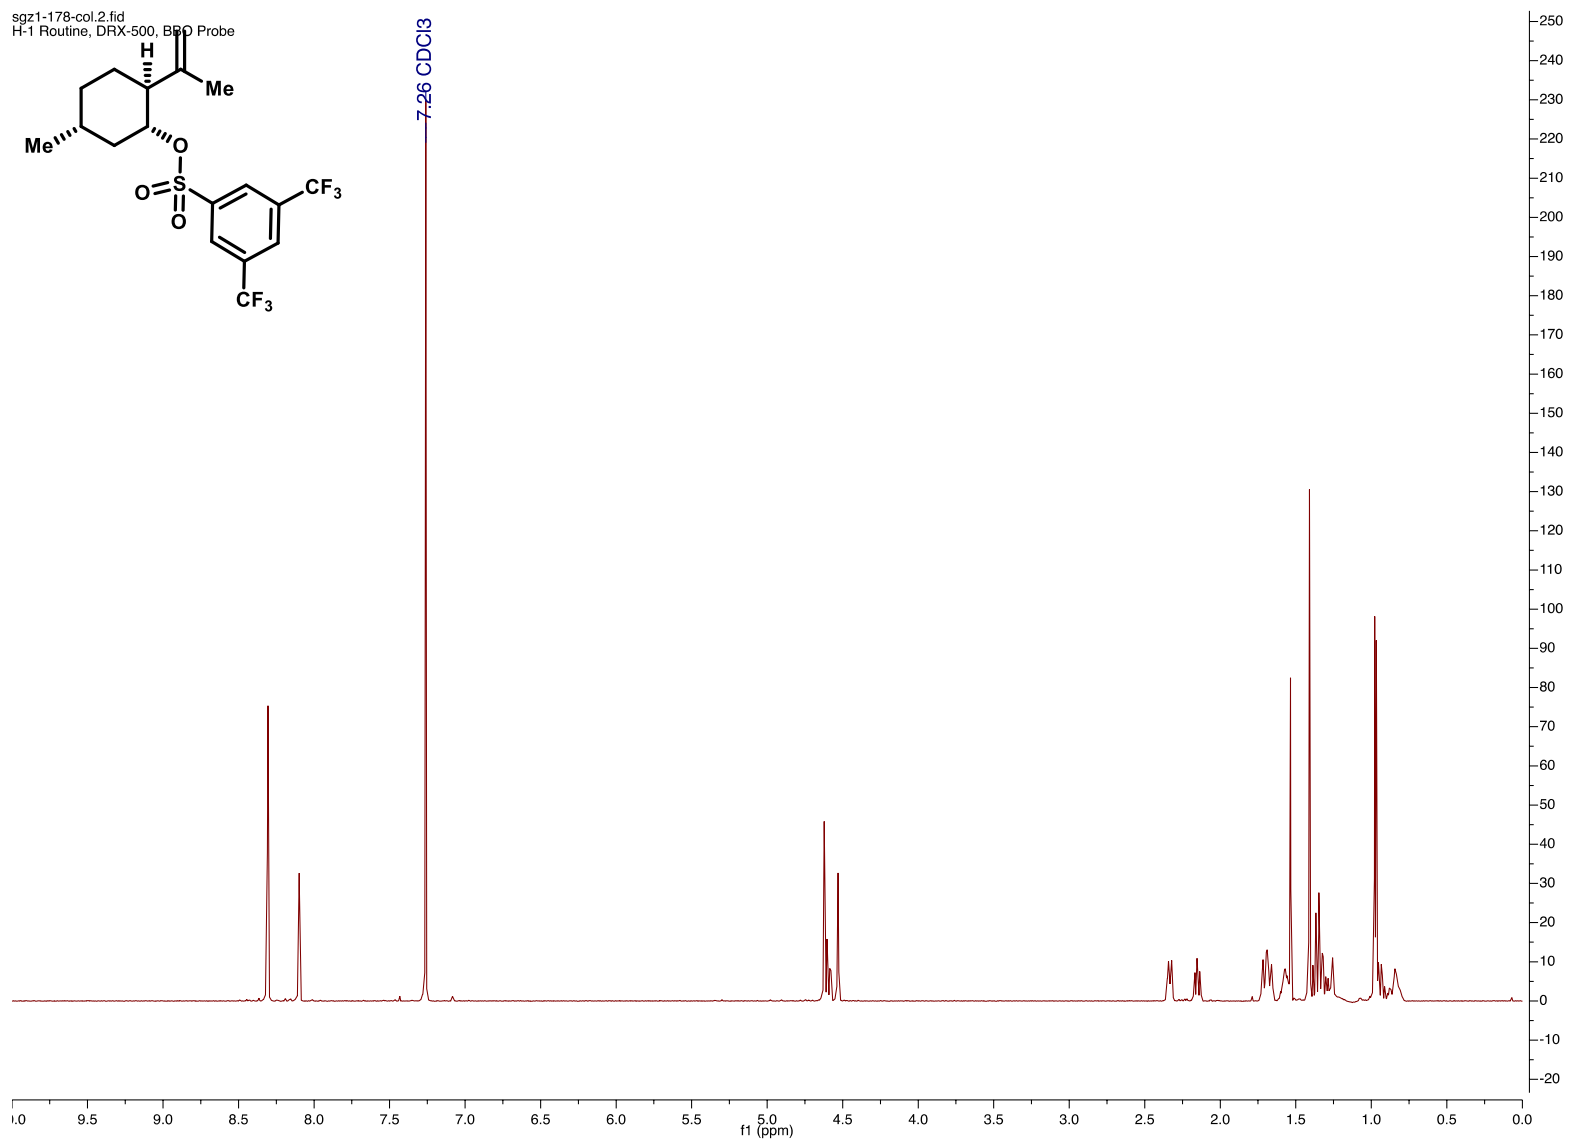

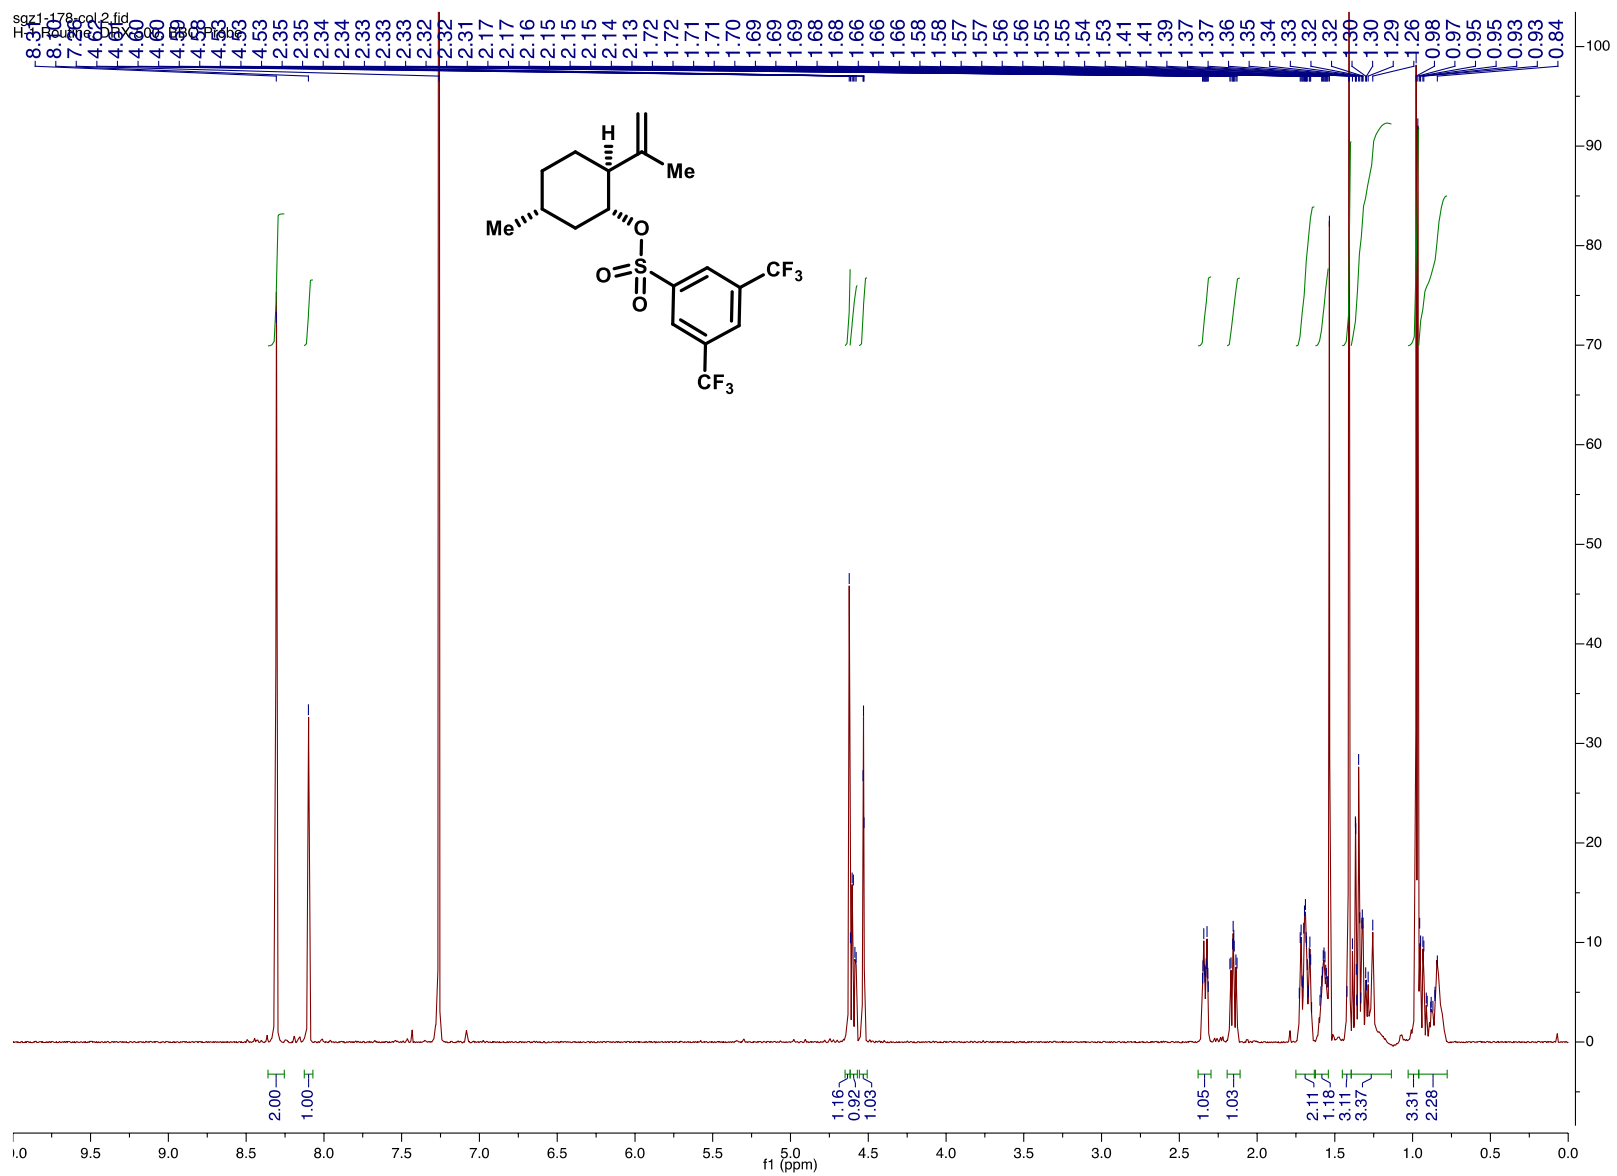



SI-06:  $^{13}\text{C}$ -NMR

sgz1-178-col.1.fid  
C-13 Routine, BBO Probe, DRX-500

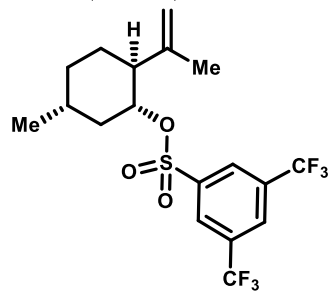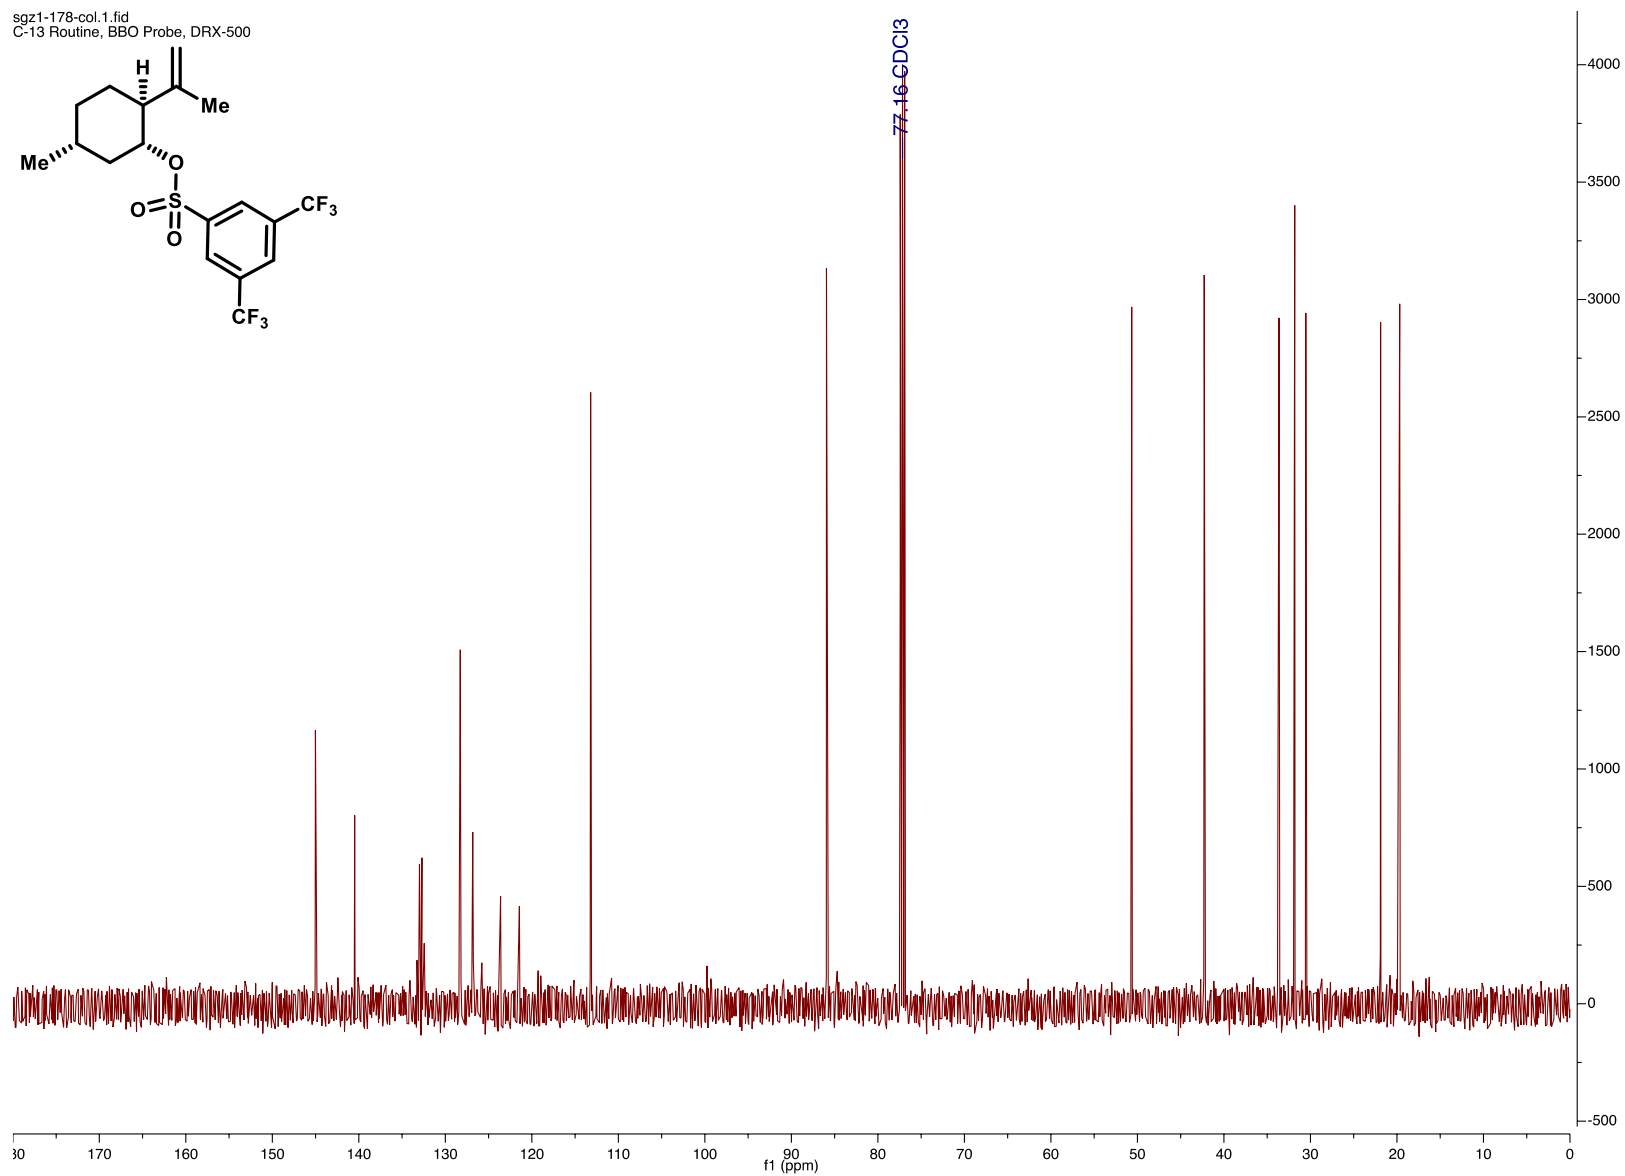

sgz1-178-col.1.fid  
C-13 Routine, BBO Probe, DRX-500

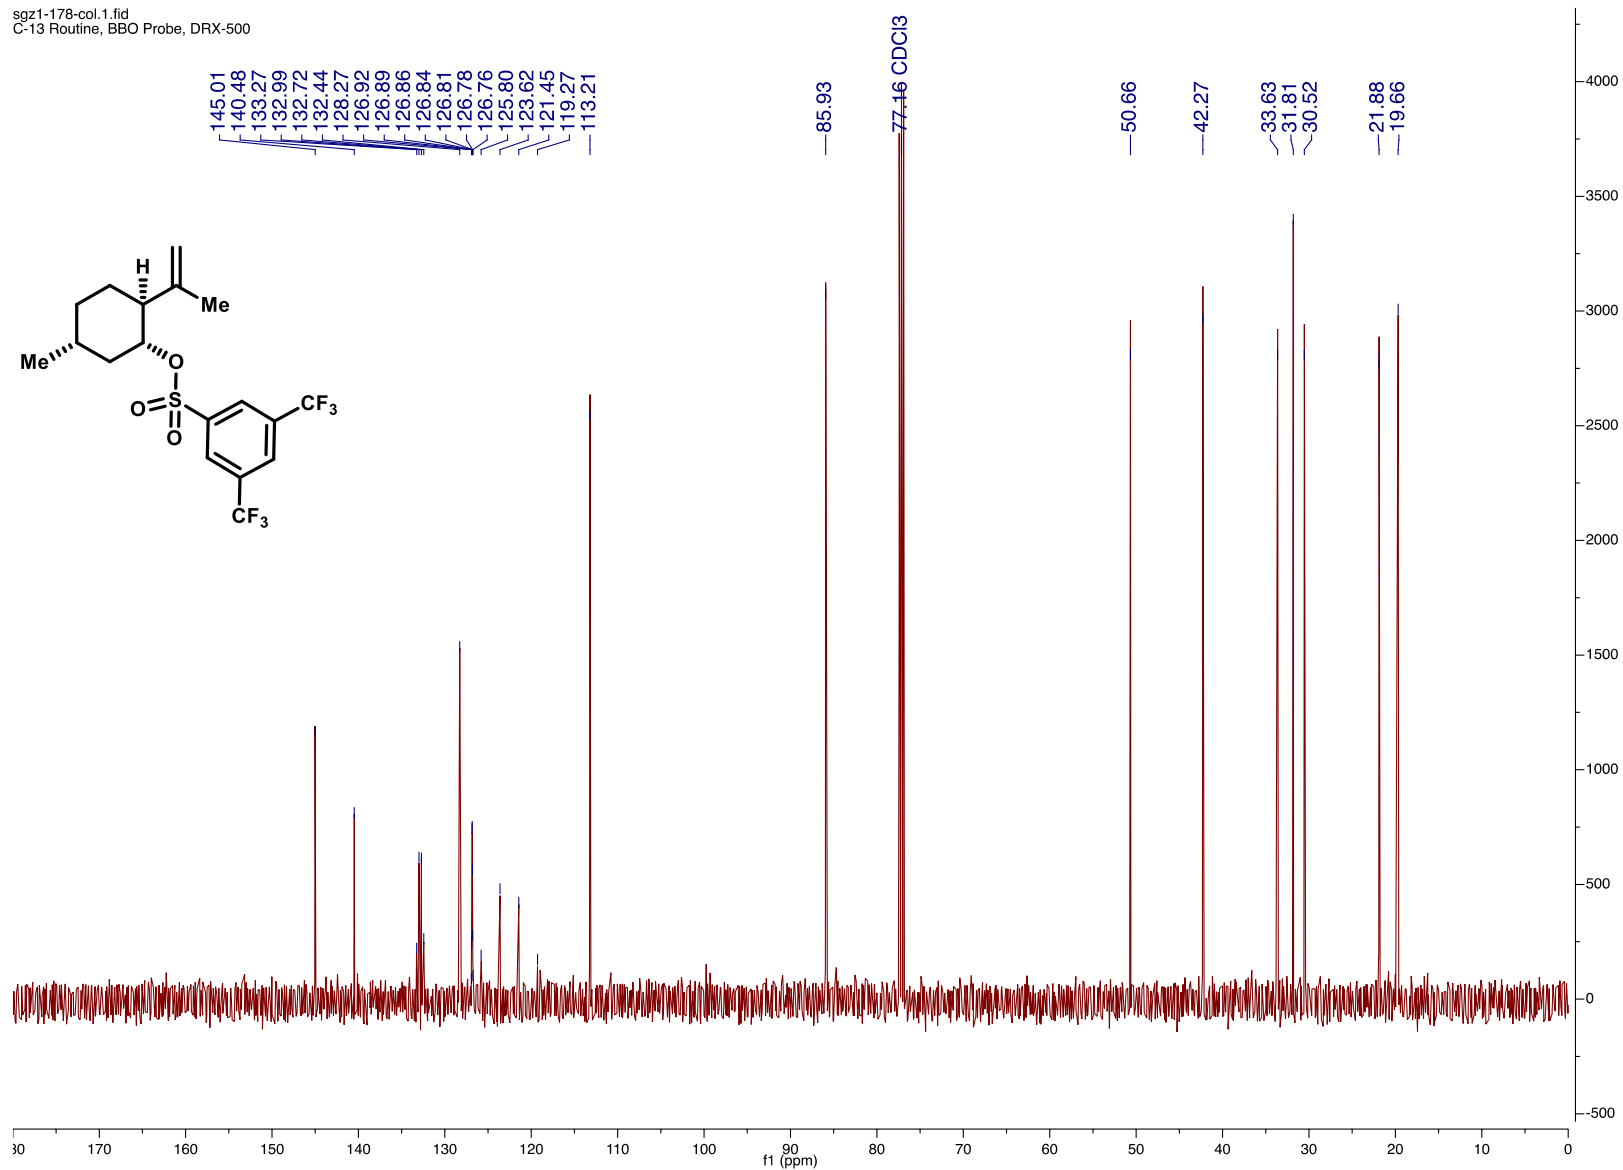

SI-06:  $^{19}\text{F}$ -NMR (Uncorrected)

SCNMR154701.1.fid  
F-19,  $\text{CDCl}_3$ , DPX-400 QNP Probe.  $\text{CF}_3\text{Cl}$  as Ref at 0 ppm.

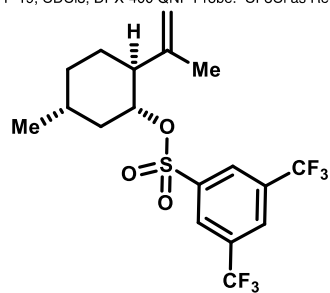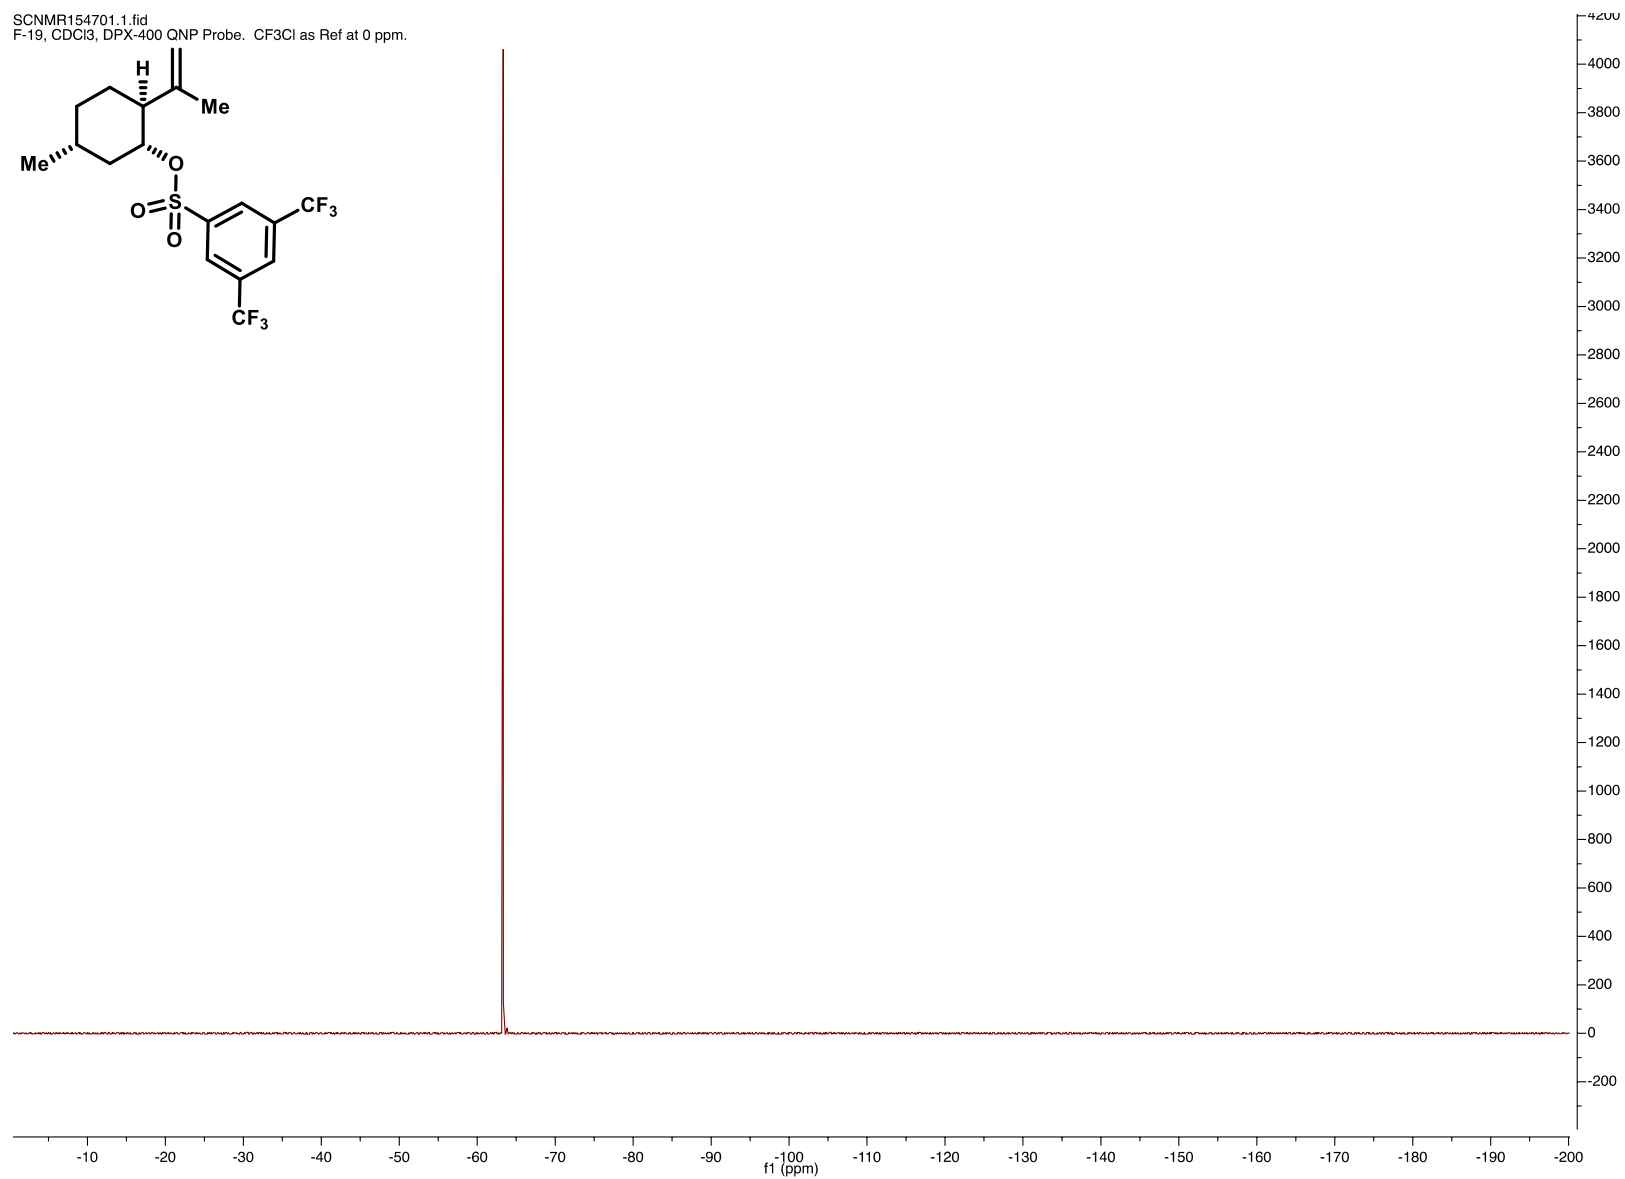

SCNMR154701.1.fid  
F-19, CDCl<sub>3</sub>, DPX-400 QNP Probe. CF<sub>3</sub>Cl as Ref at 0 ppm.

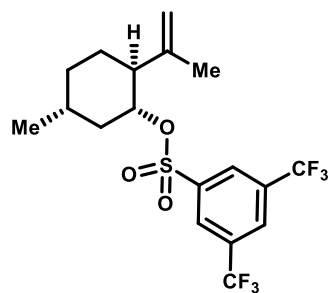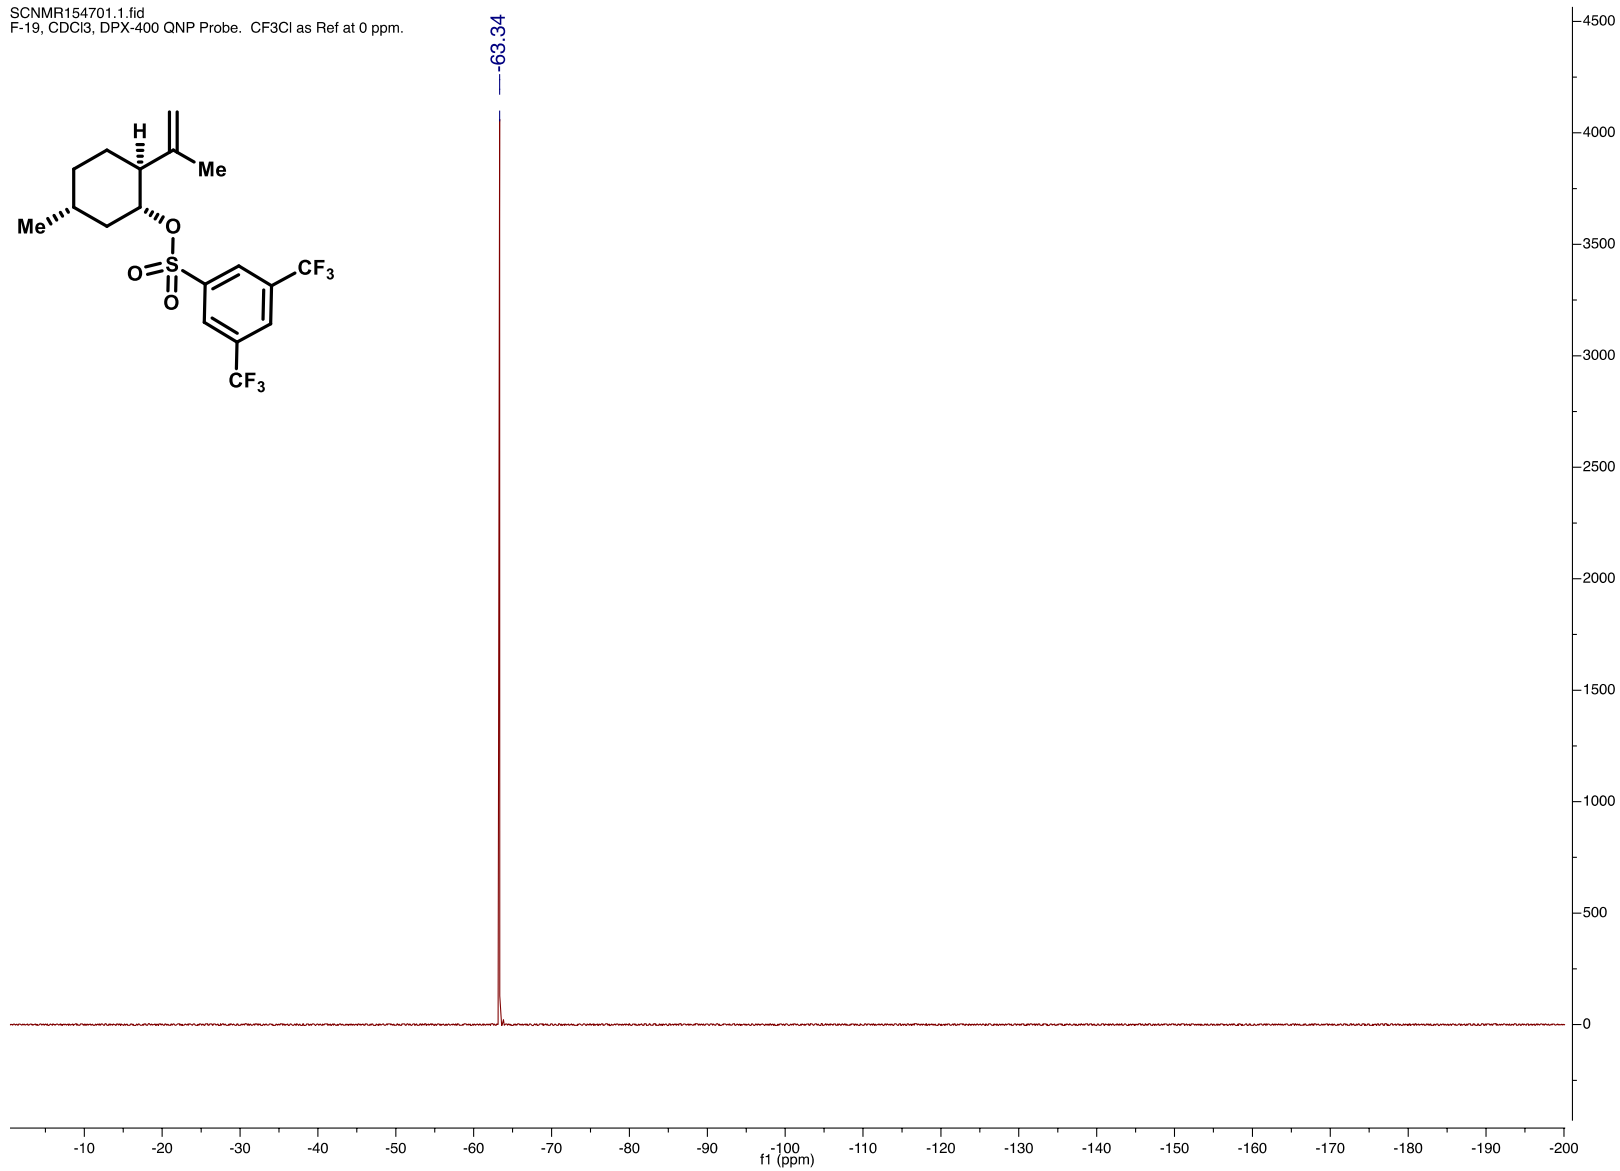

6a:  $^1\text{H}$ -NMR

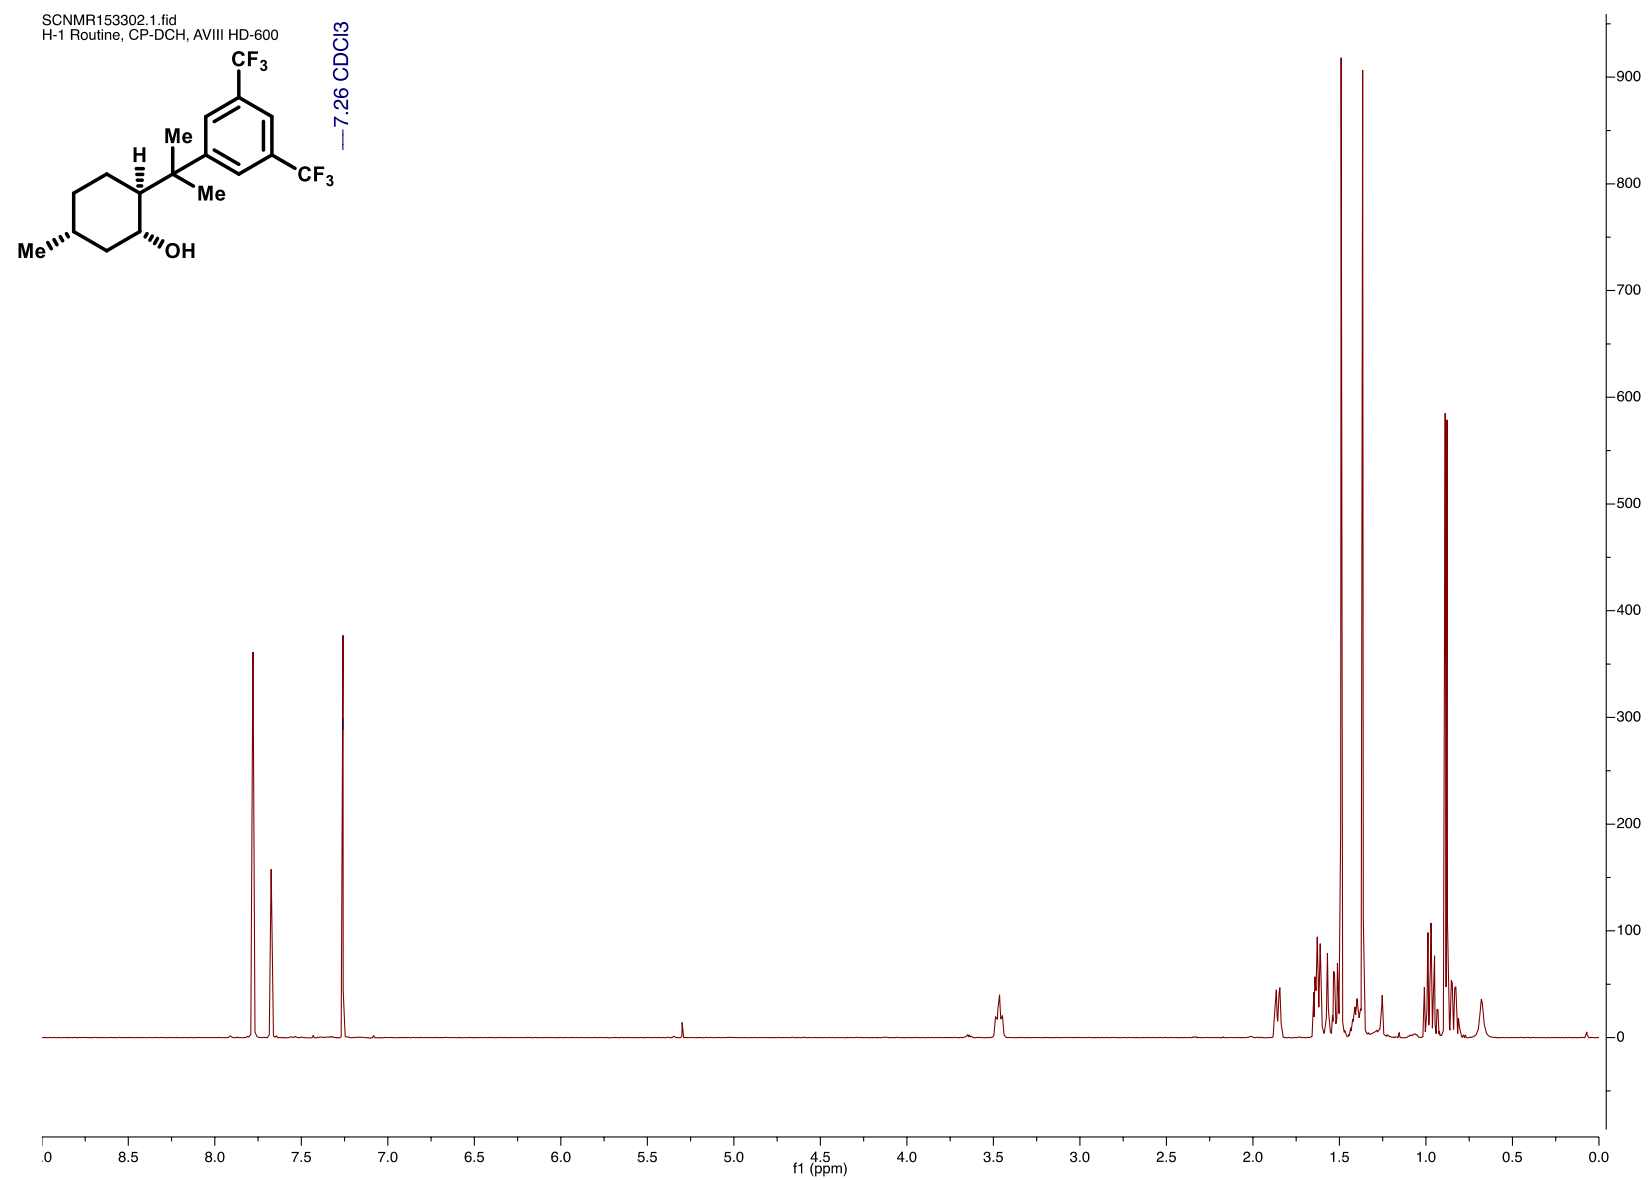

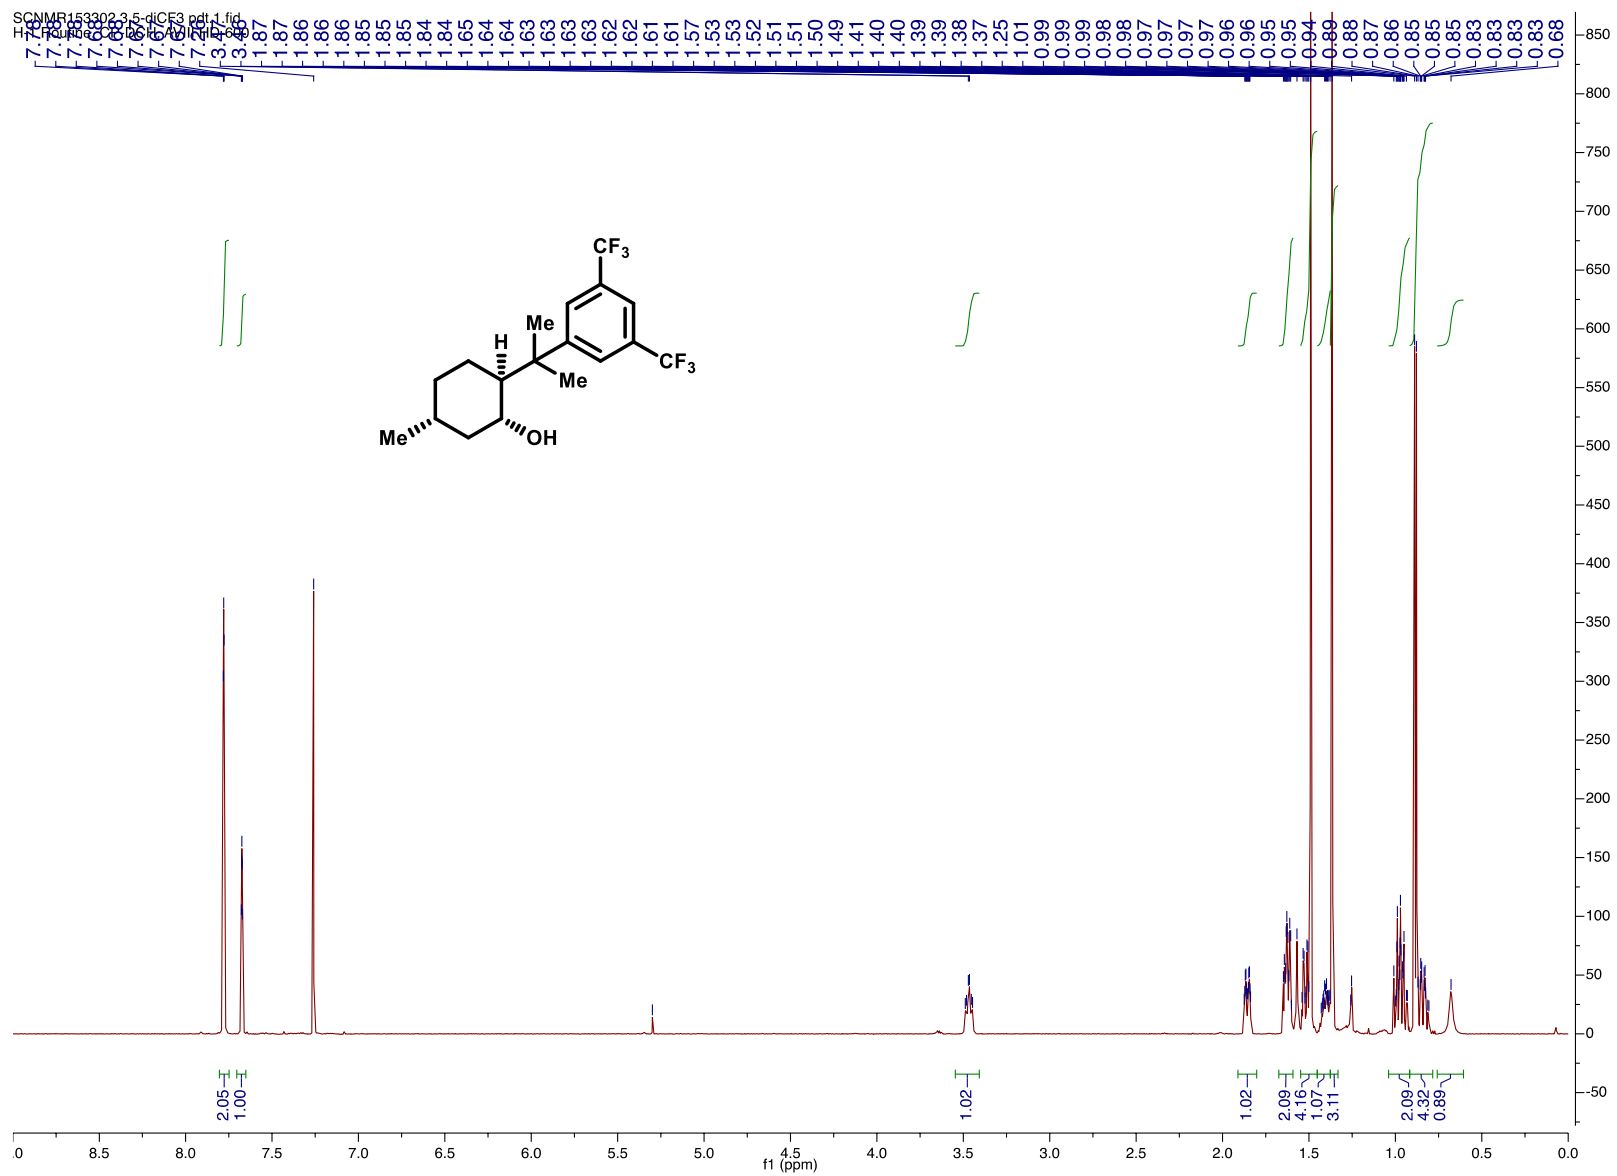

6a:  $^{13}\text{C}$ -NMR

SCNMR153302.2.fid  
C-13 Routine 1D, CPDCH CryoProbe, AVIII-600

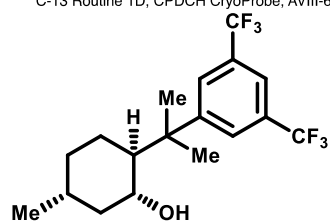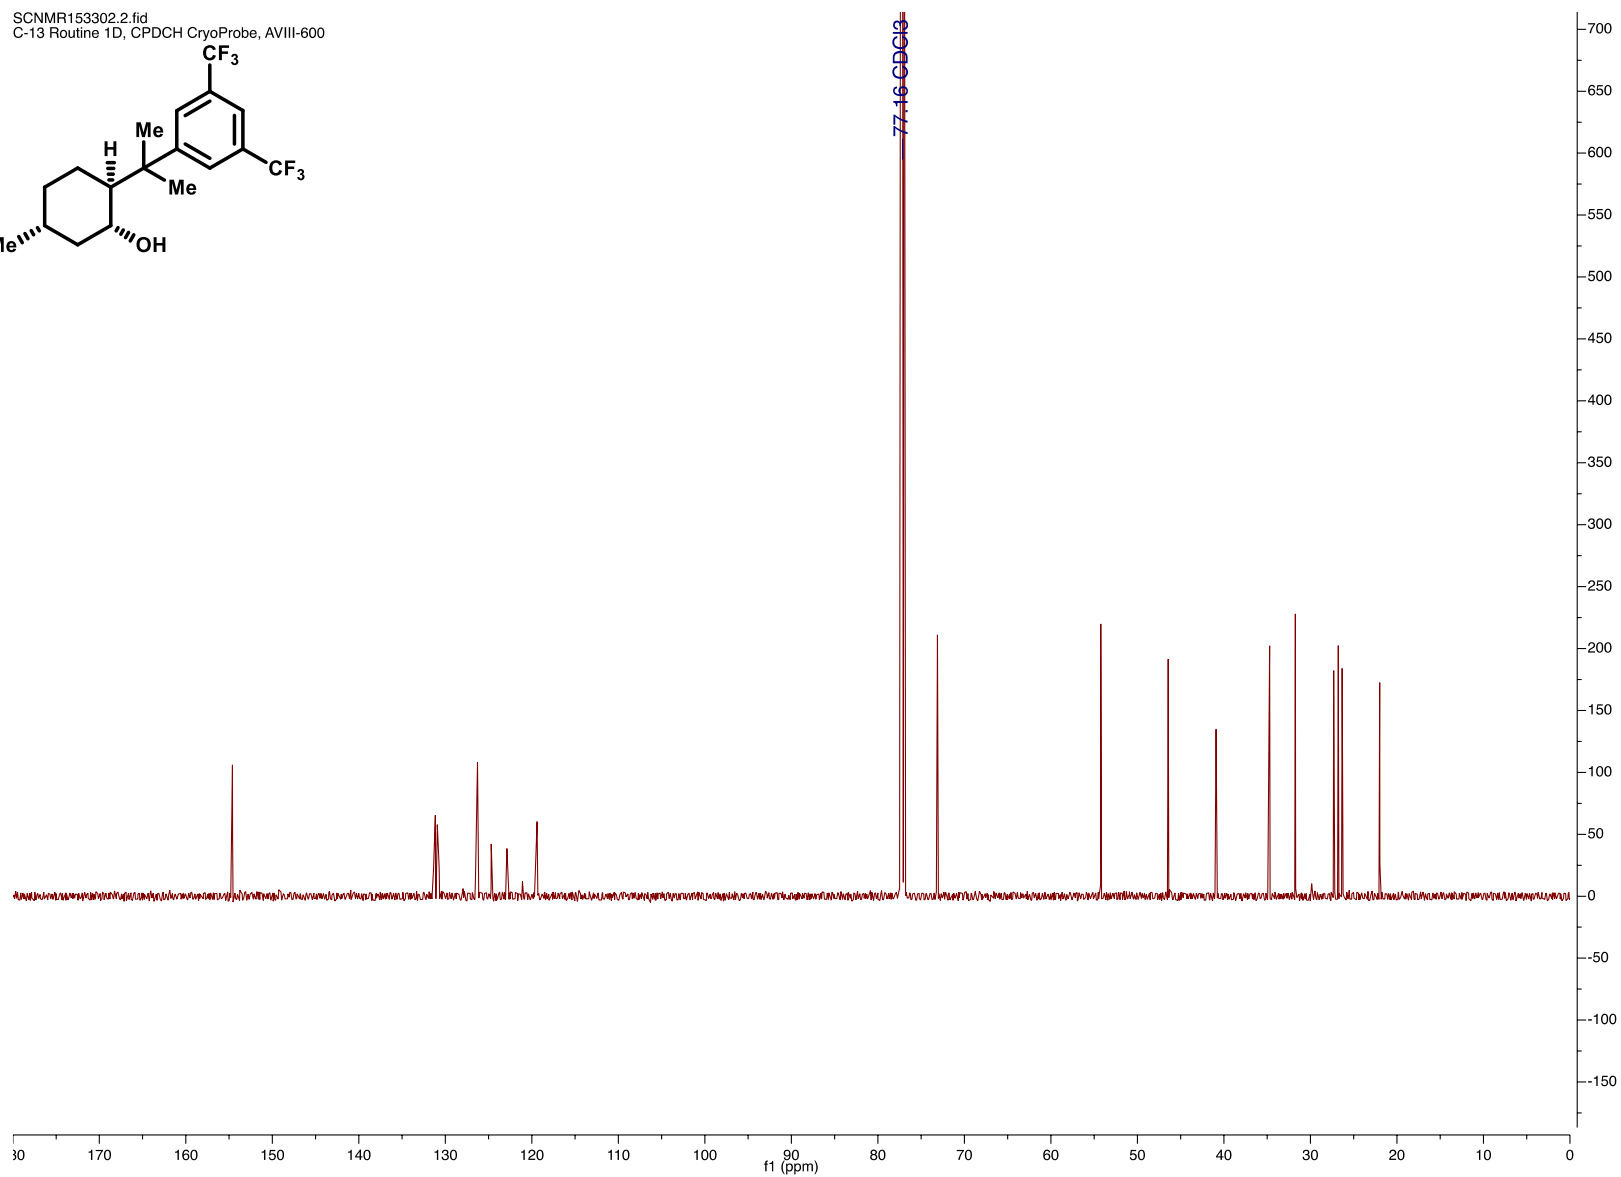

SCNMR153302 3,5-diCF<sub>3</sub> pdt.2.fid  
C-13 Routine 1D, CPDCH CryoProbe, AVIII-600

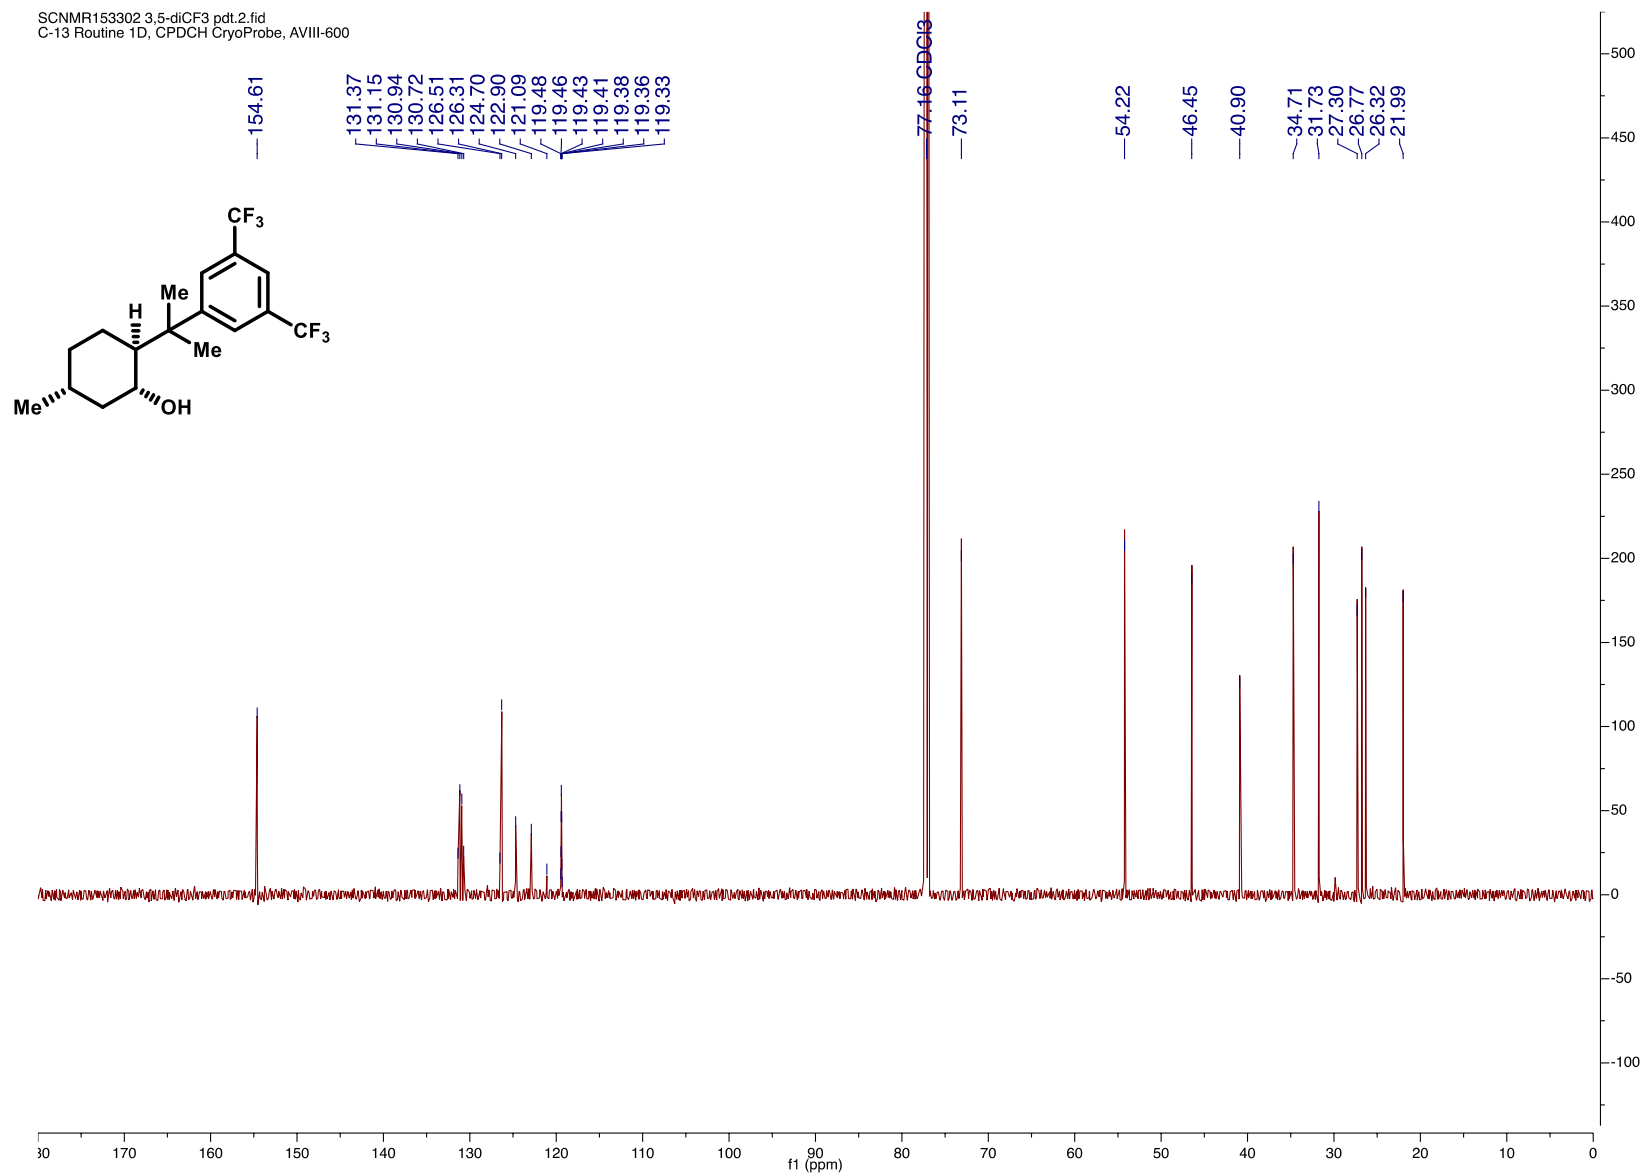



6a:  $^{19}\text{F}$ -NMR (Uncorrected)

SCNMR153302.3.fid  
F-19,  $\text{CDCl}_3$ , DPX-400 QNP Probe.  $\text{CF}_3\text{Cl}$  as Ref at 0 ppm.

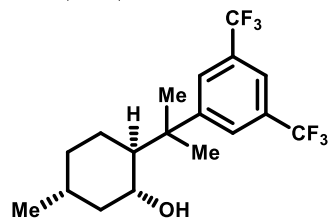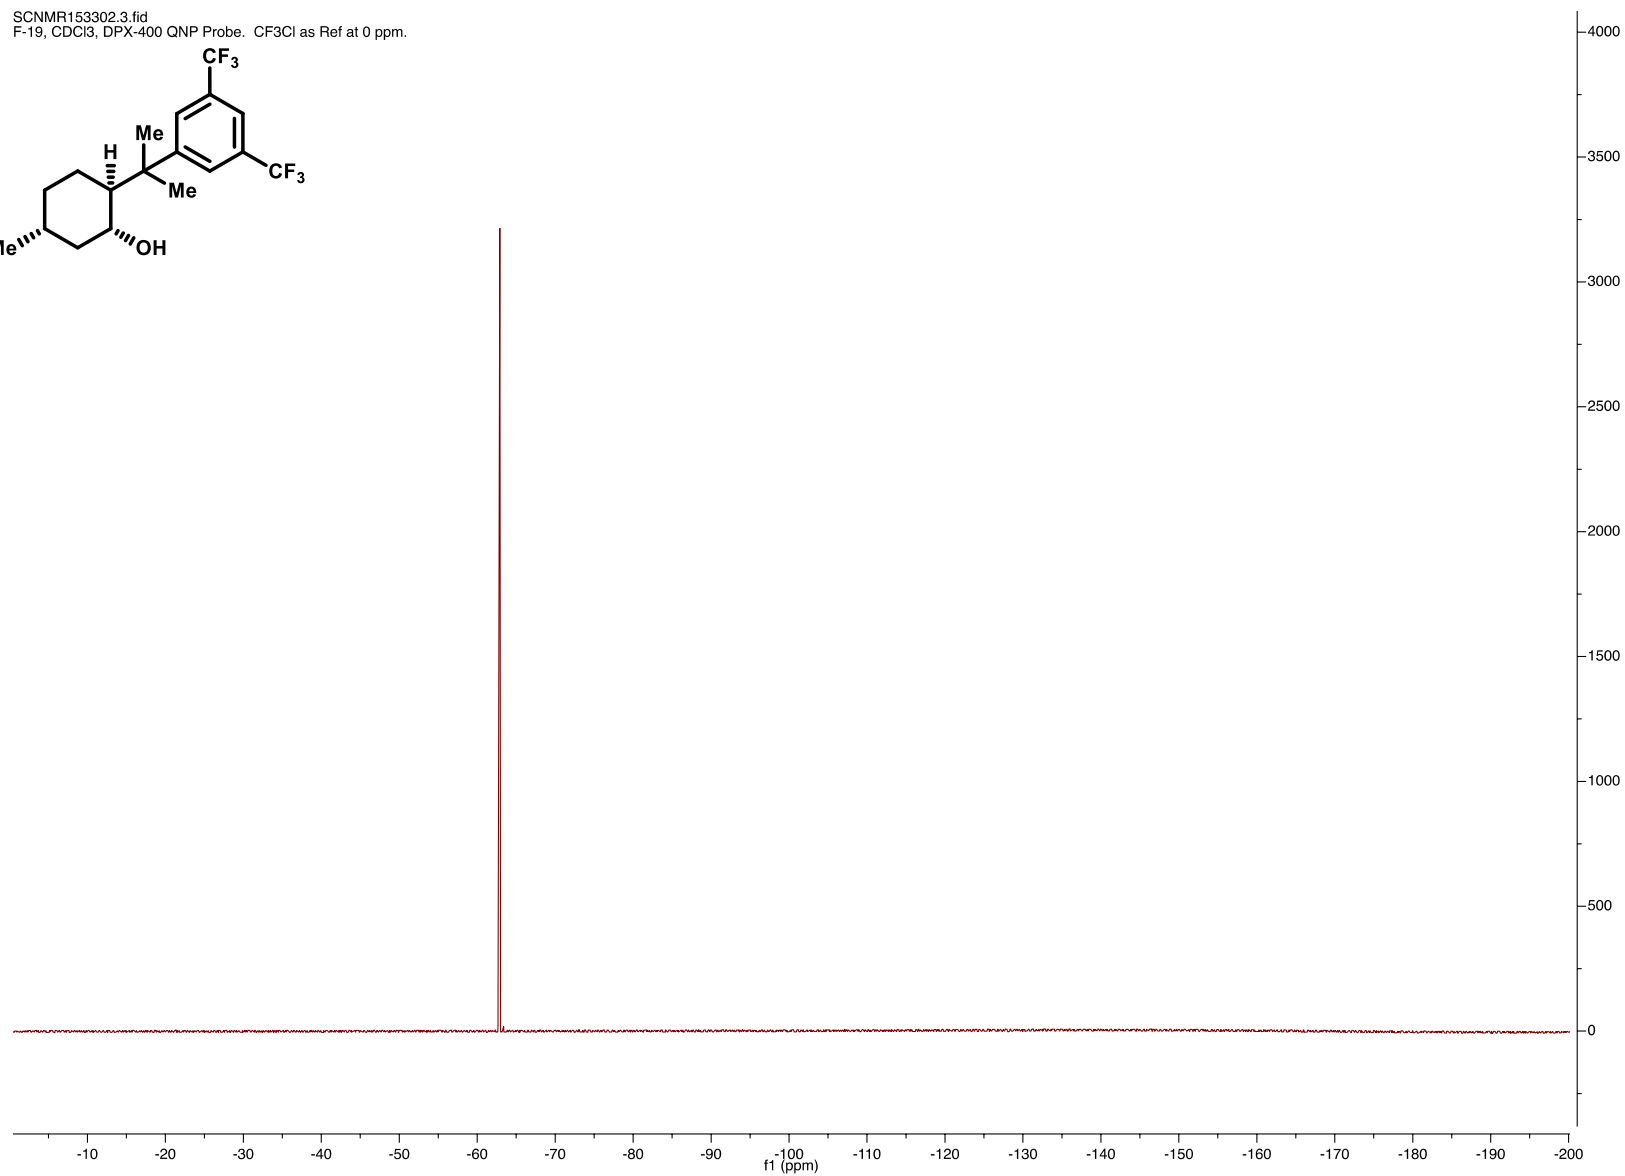

SCNMR153302 3,5-diCF<sub>3</sub> pdt.3.fid  
F-19, CDCl<sub>3</sub>, DPX-400 QNP Probe. CF<sub>3</sub>Cl as Ref at 0 ppm.

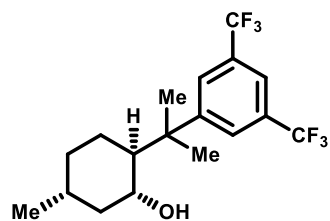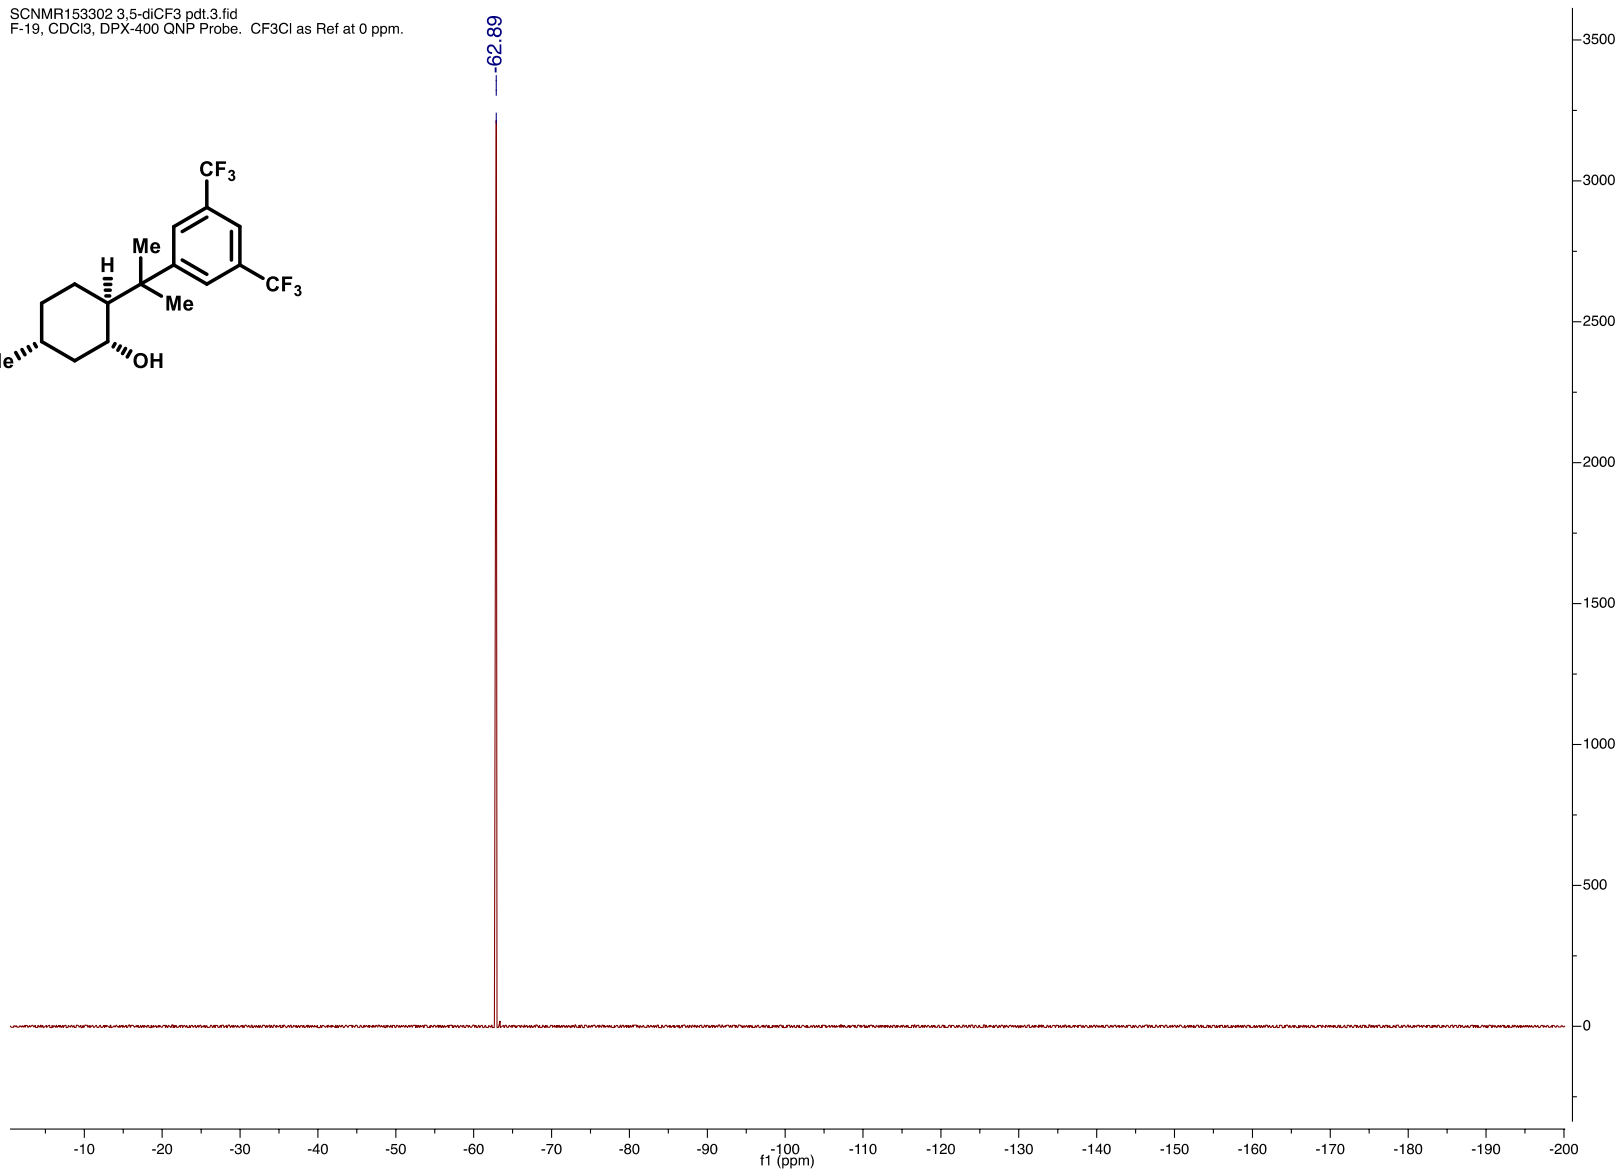

SI-07: <sup>1</sup>H-NMR

SCNMR137201.1.fid  
H-1 Routine, CP-DCH, AVIII HD-600

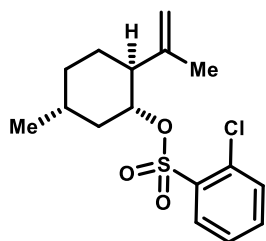

— 7.26 CDCl<sub>3</sub>

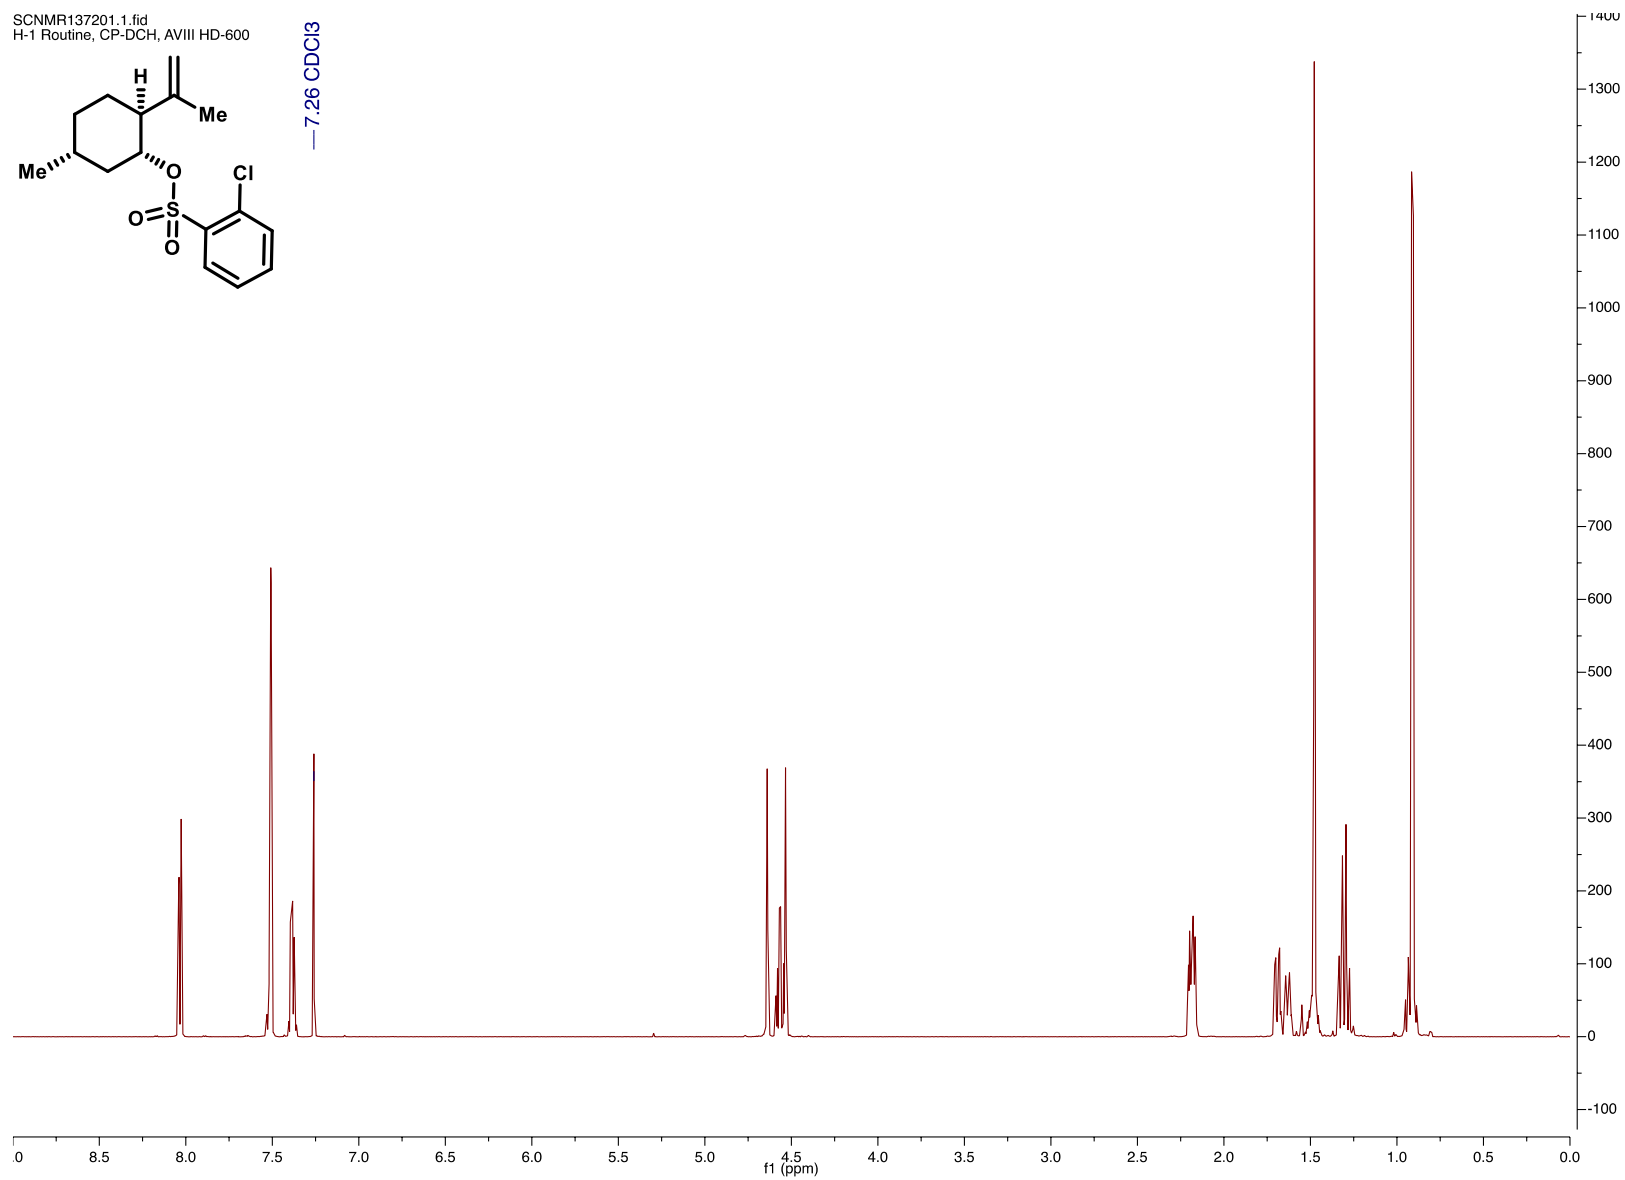

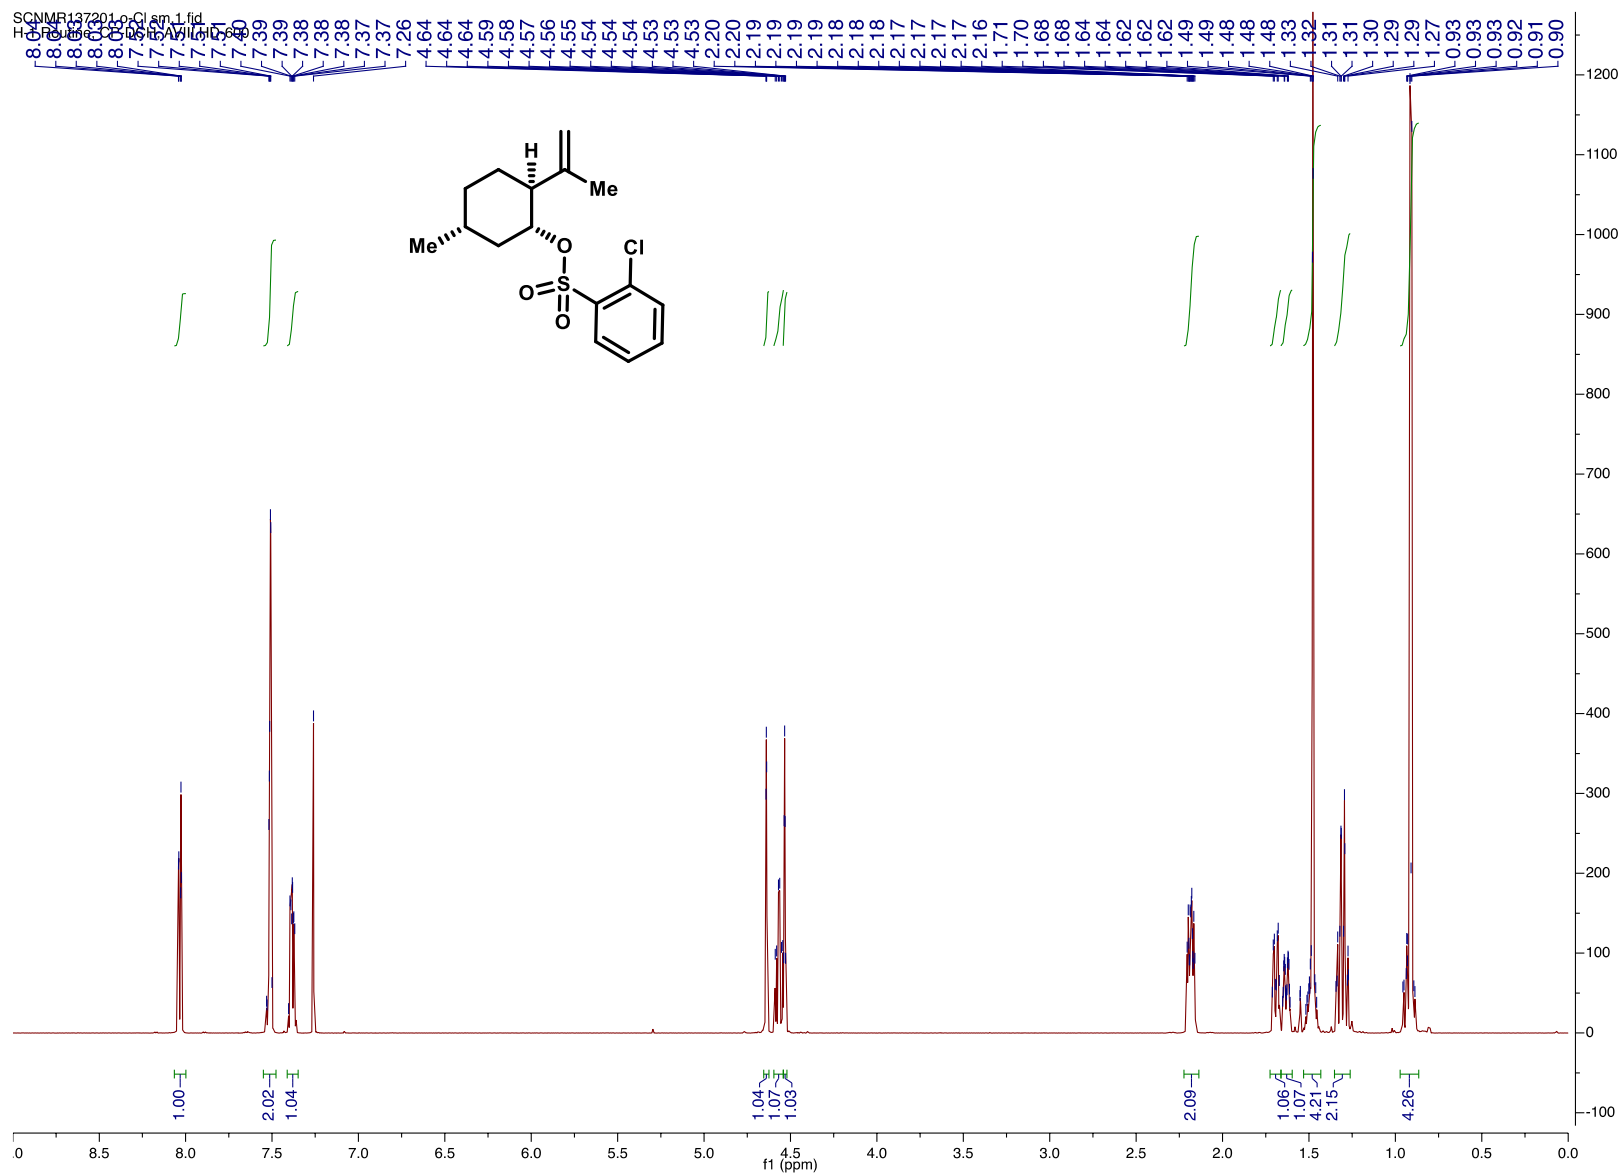

SI-07:  $^{13}\text{C}$ -NMR

SCNMR137201.2.fid  
C-13 Routine 1D, CPDCH CryoProbe, AVIII-600

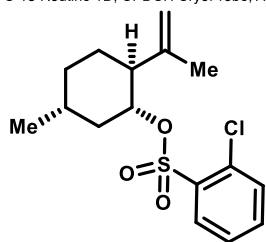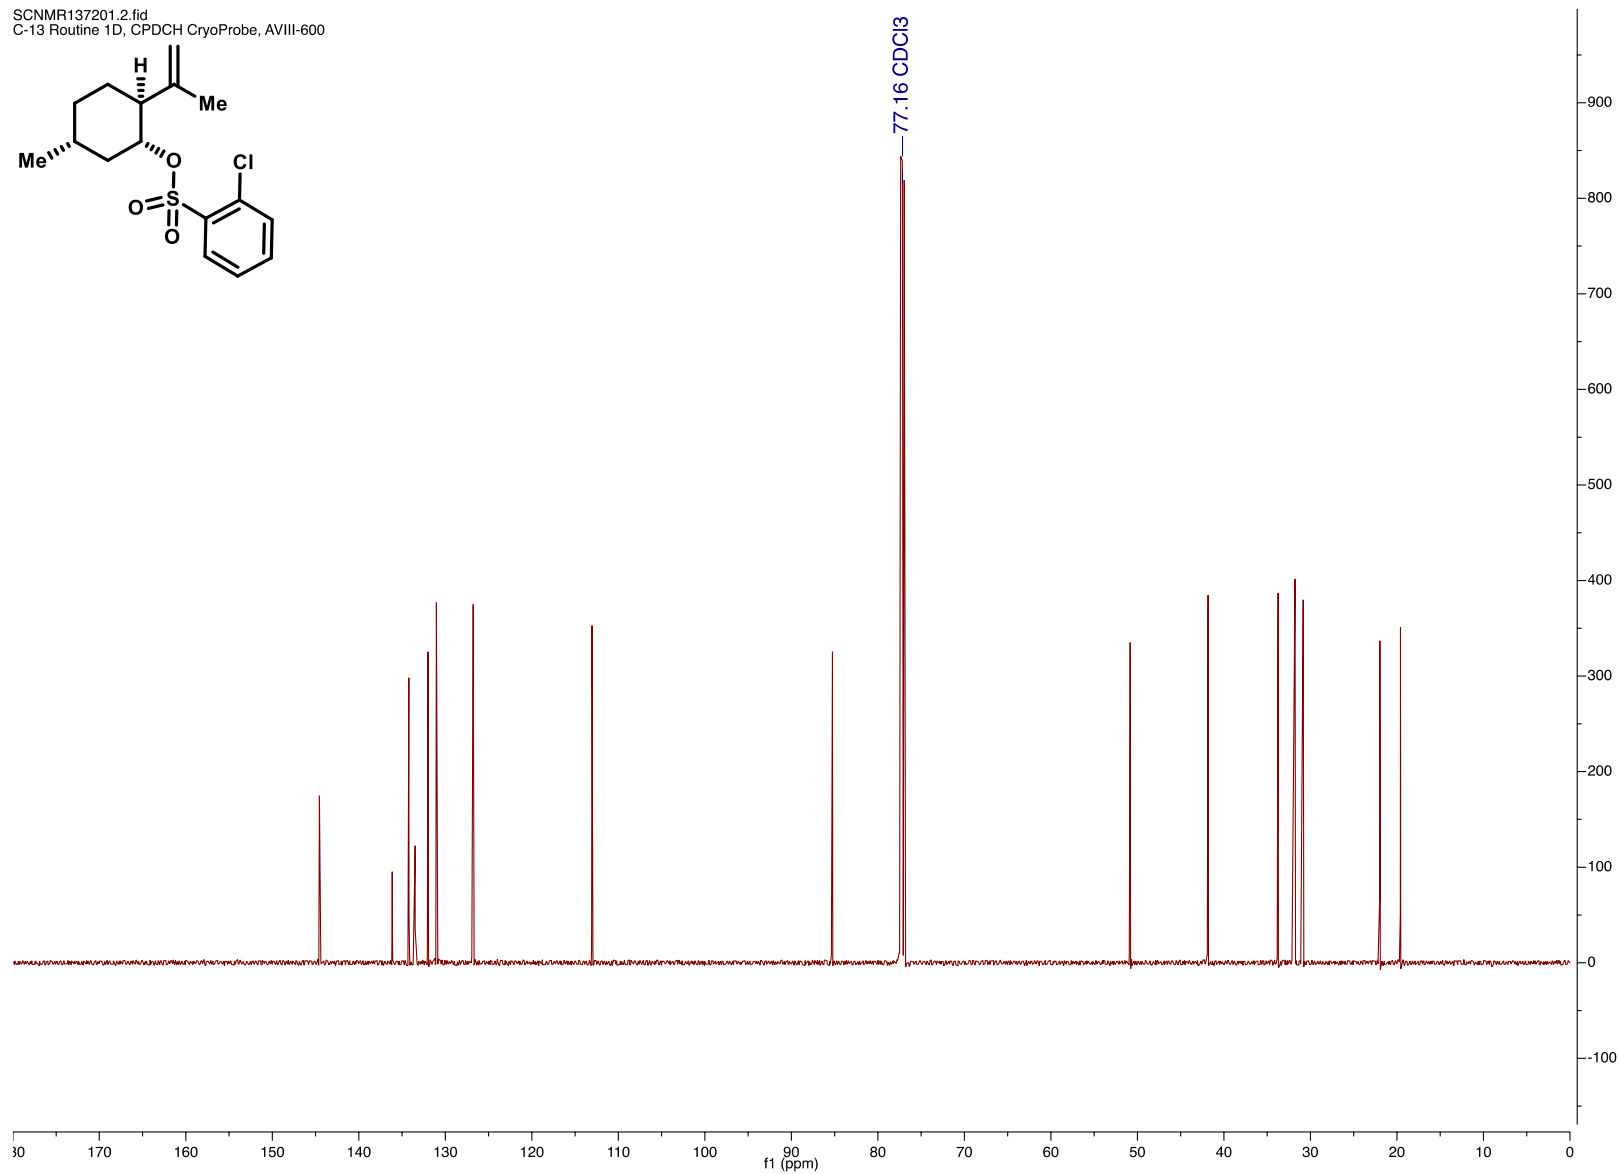

SCNMR137201 o-Cl sm.2.fid  
C-13 Routine 1D, CPDCH CryoProbe, AVIII-600

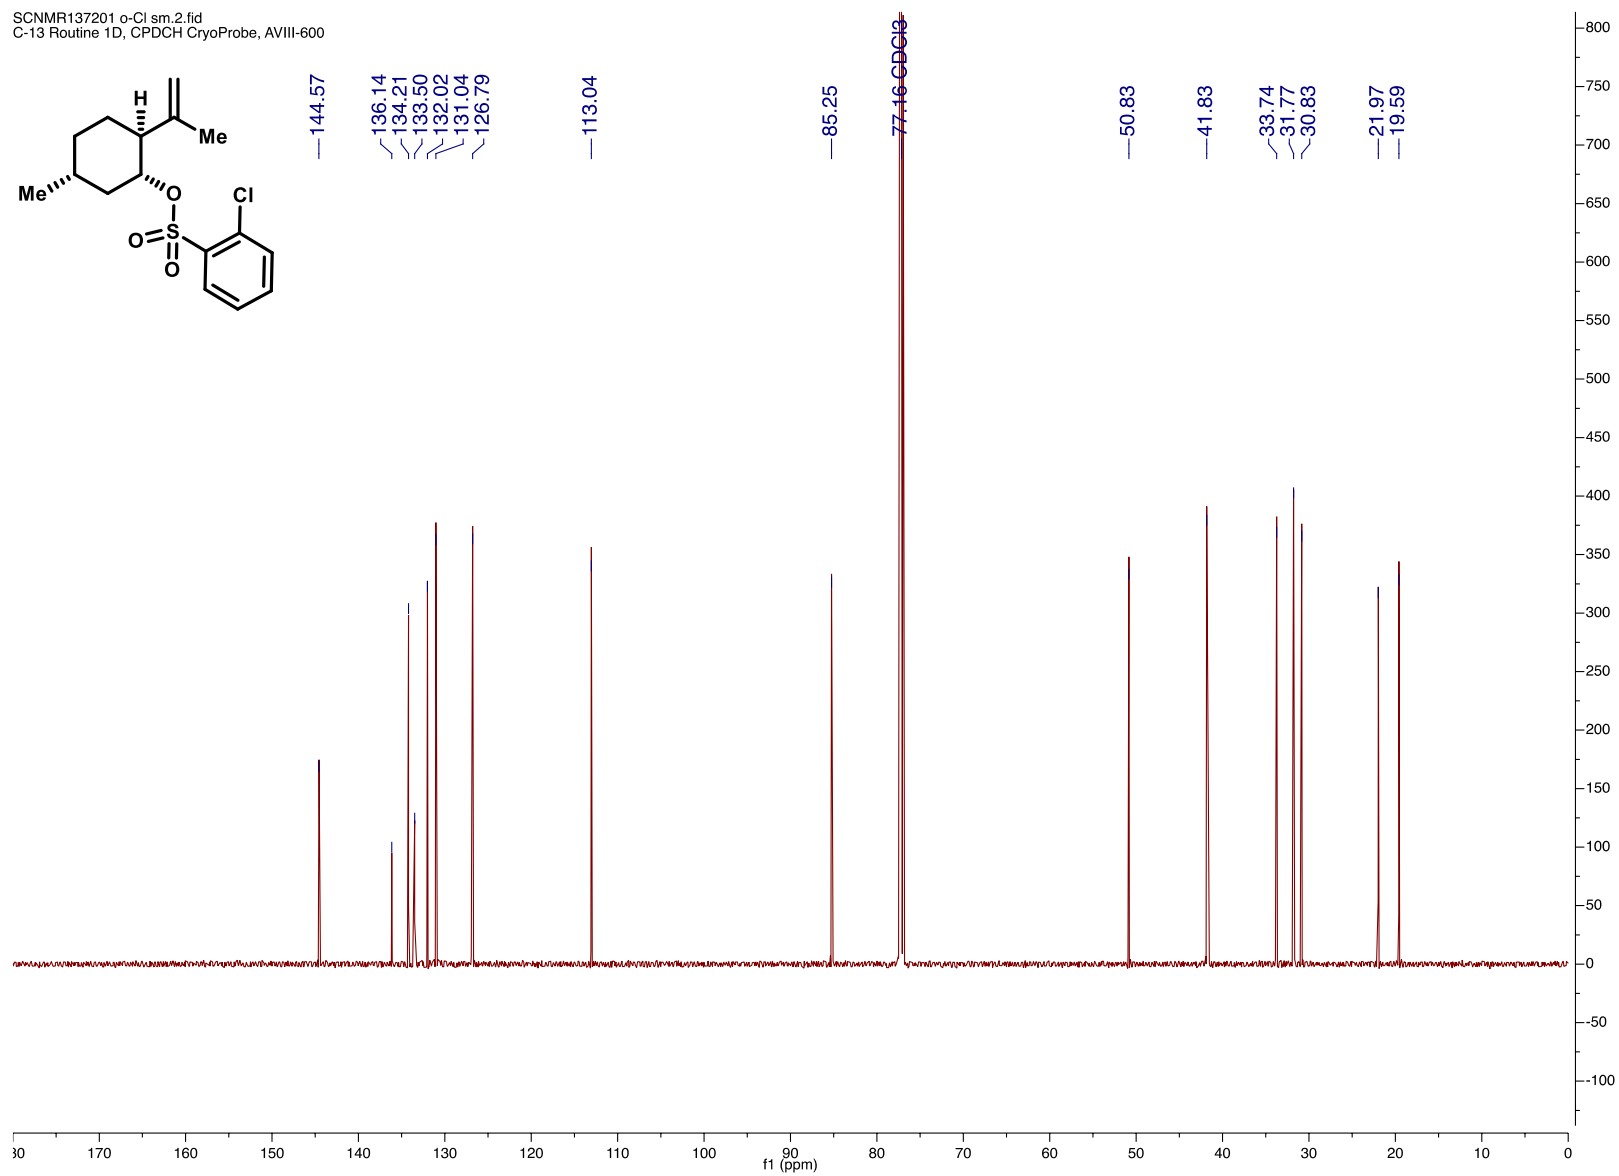

6b:  $^1\text{H}$ -NMR

SCNMR137501.3.fid  
H-1 Routine, CP-DCH, AVIII HD-600

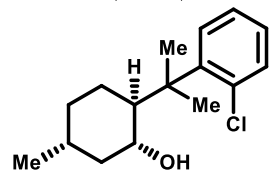

— 7.26 CDCl<sub>3</sub>

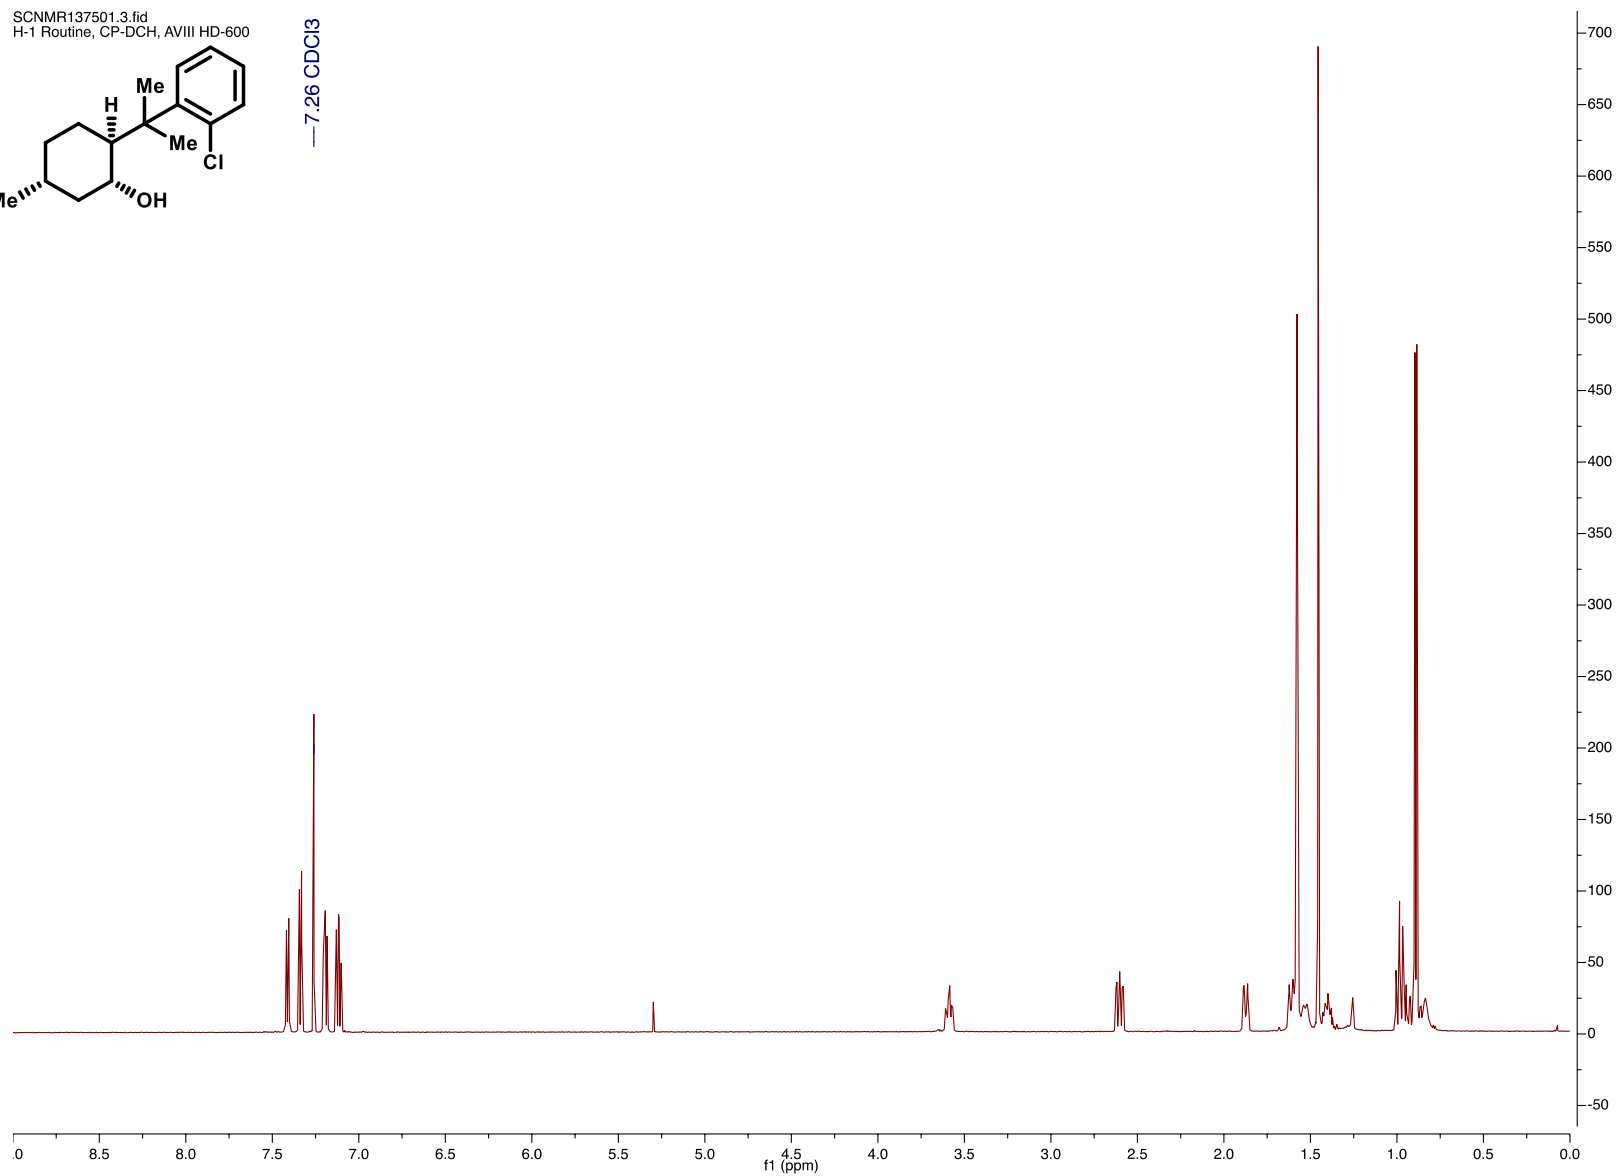

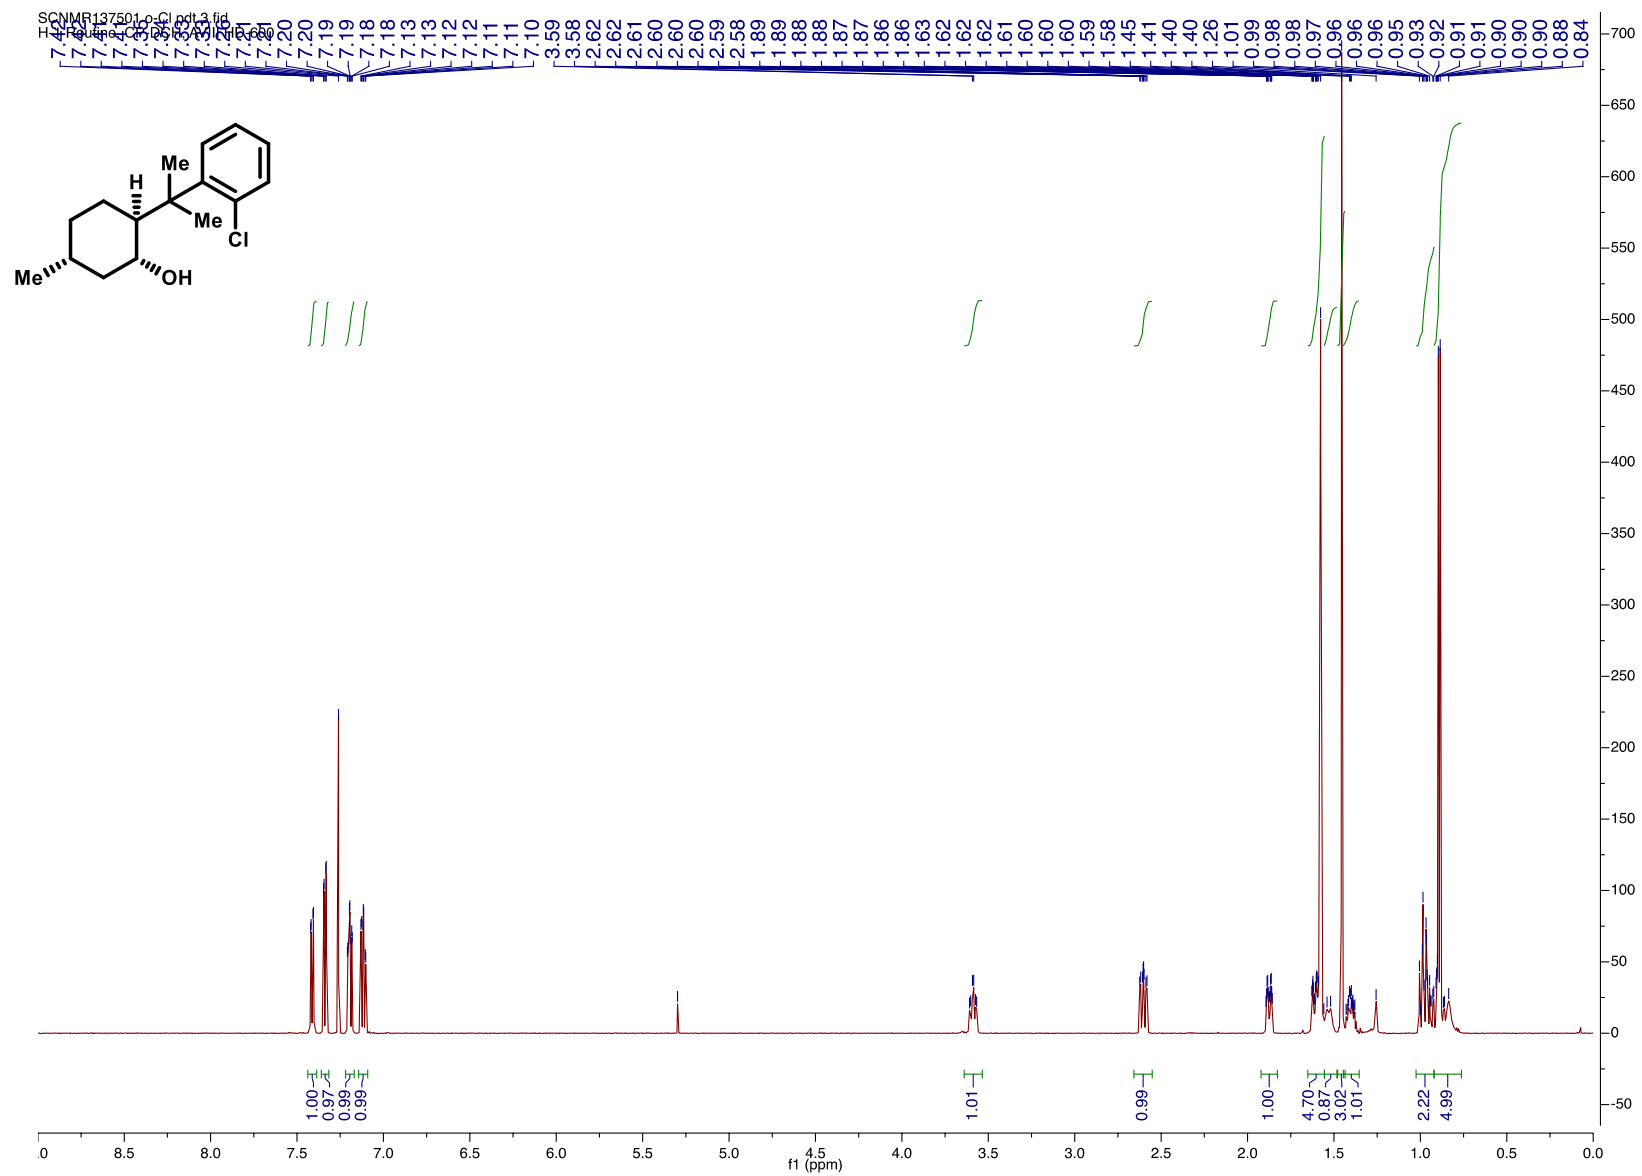



6b:  $^{13}\text{C}$ -NMR

SCNMR137501.4.fid  
C-13 Routine 1D, CPDCH CryoProbe, AVIII-600

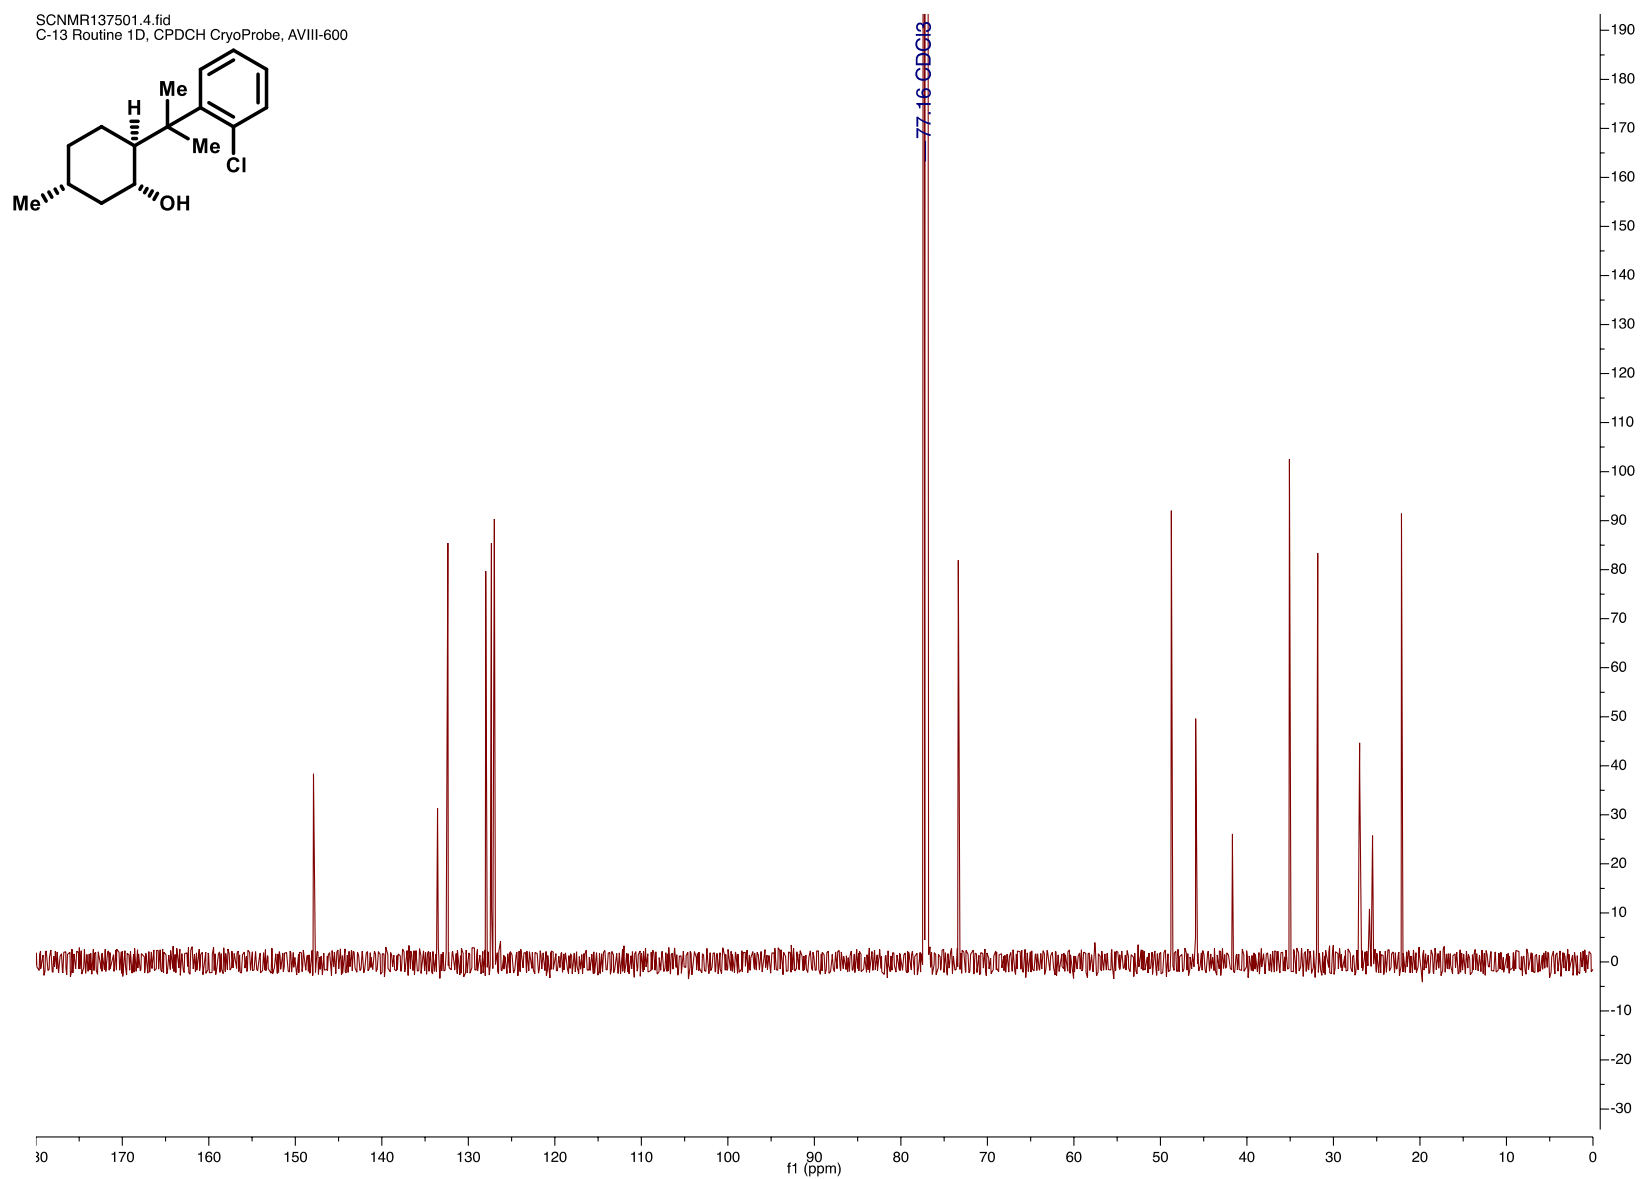

SCNMR137501 o-Cl.pdt.4.fid  
C-13 Routine 1D, CPDCH CryoProbe, AVIII-600

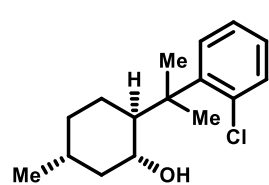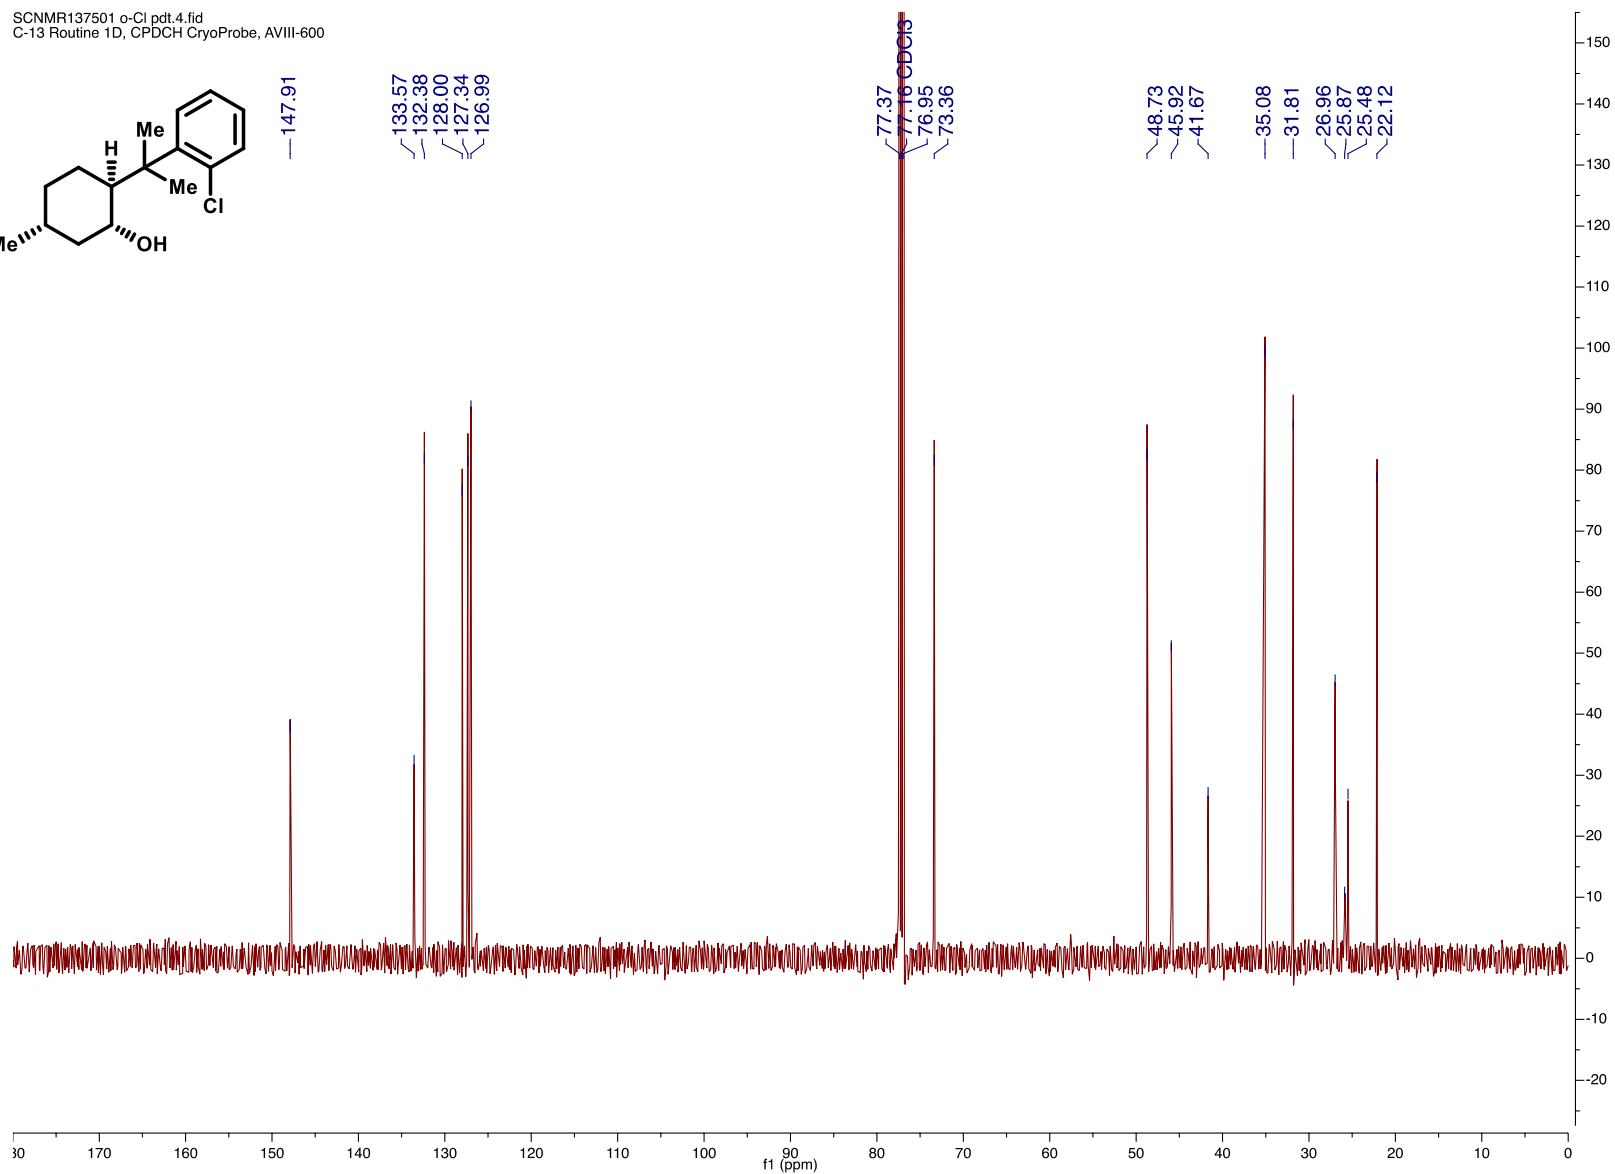

SI-08:  $^1\text{H}$ -NMR

SCNMR155601.1.fid  
H-1 Routine. CPQCI, AVIII-600, 12-20-2013

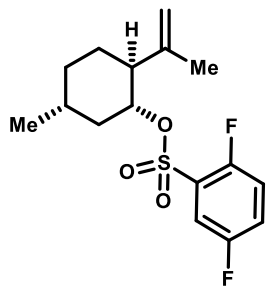

—7.26 CDCI3

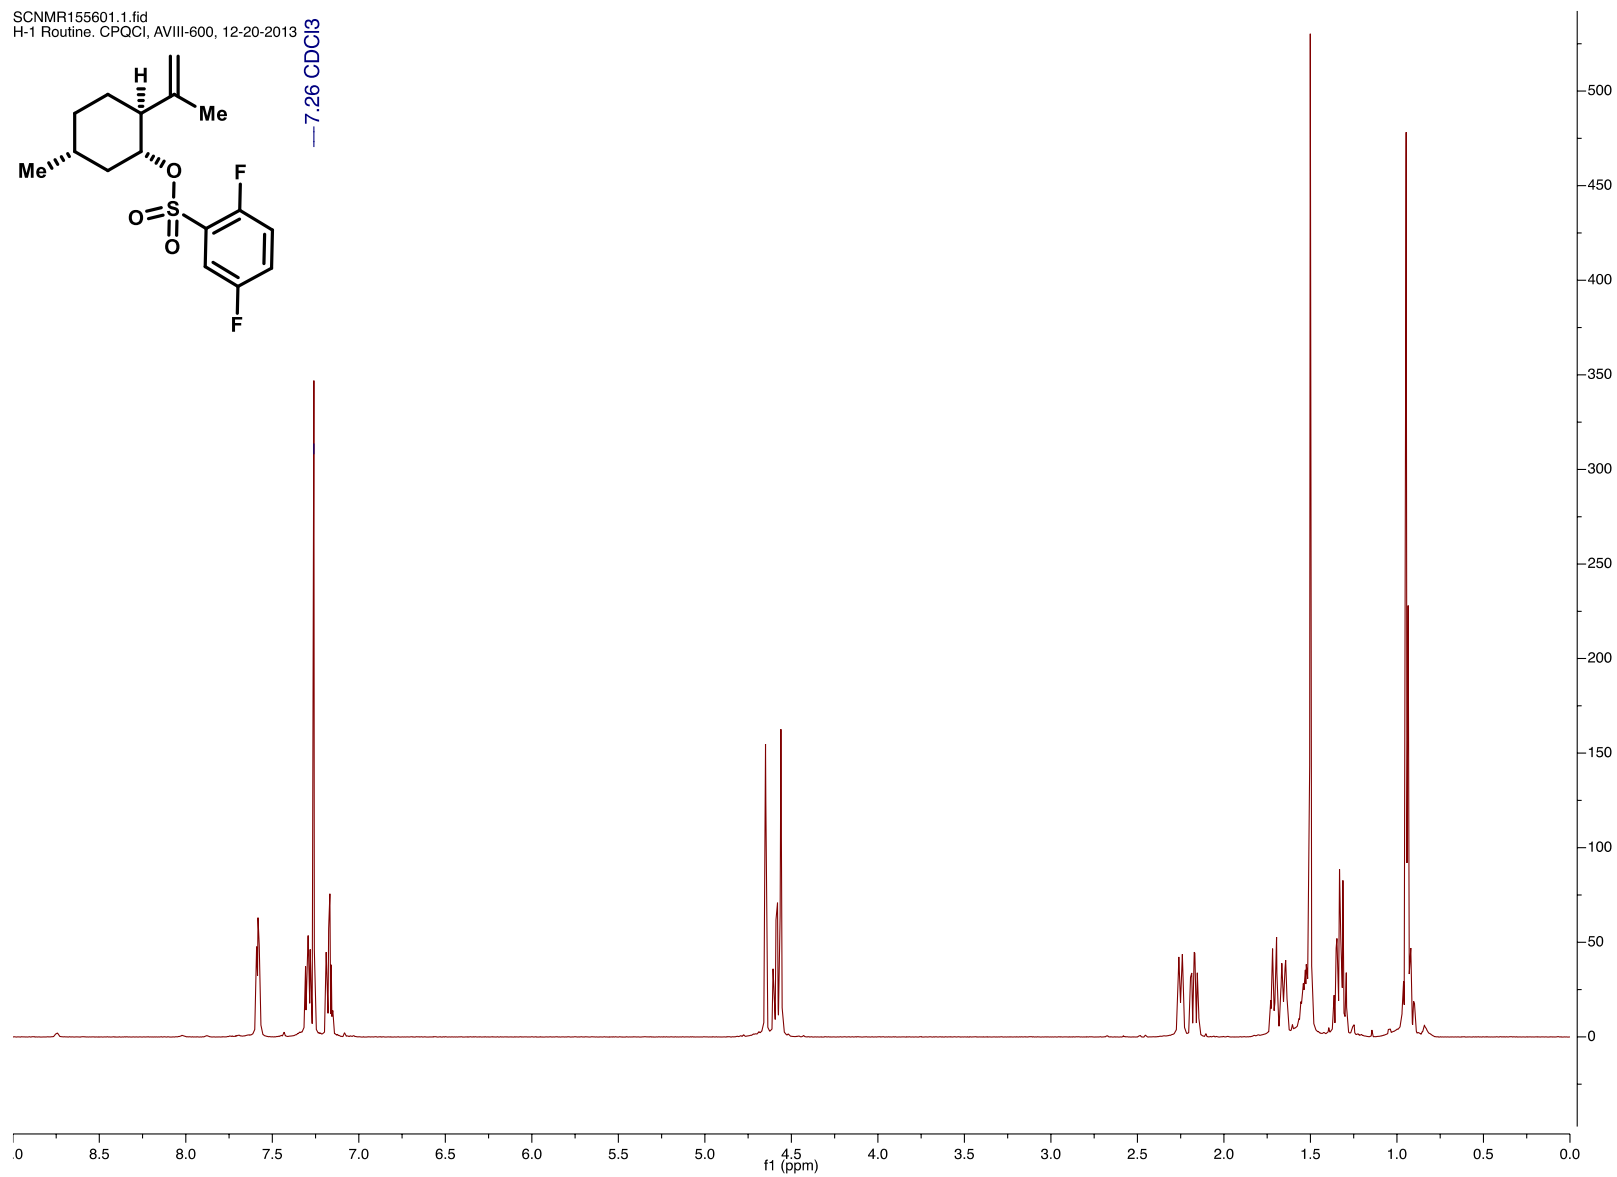

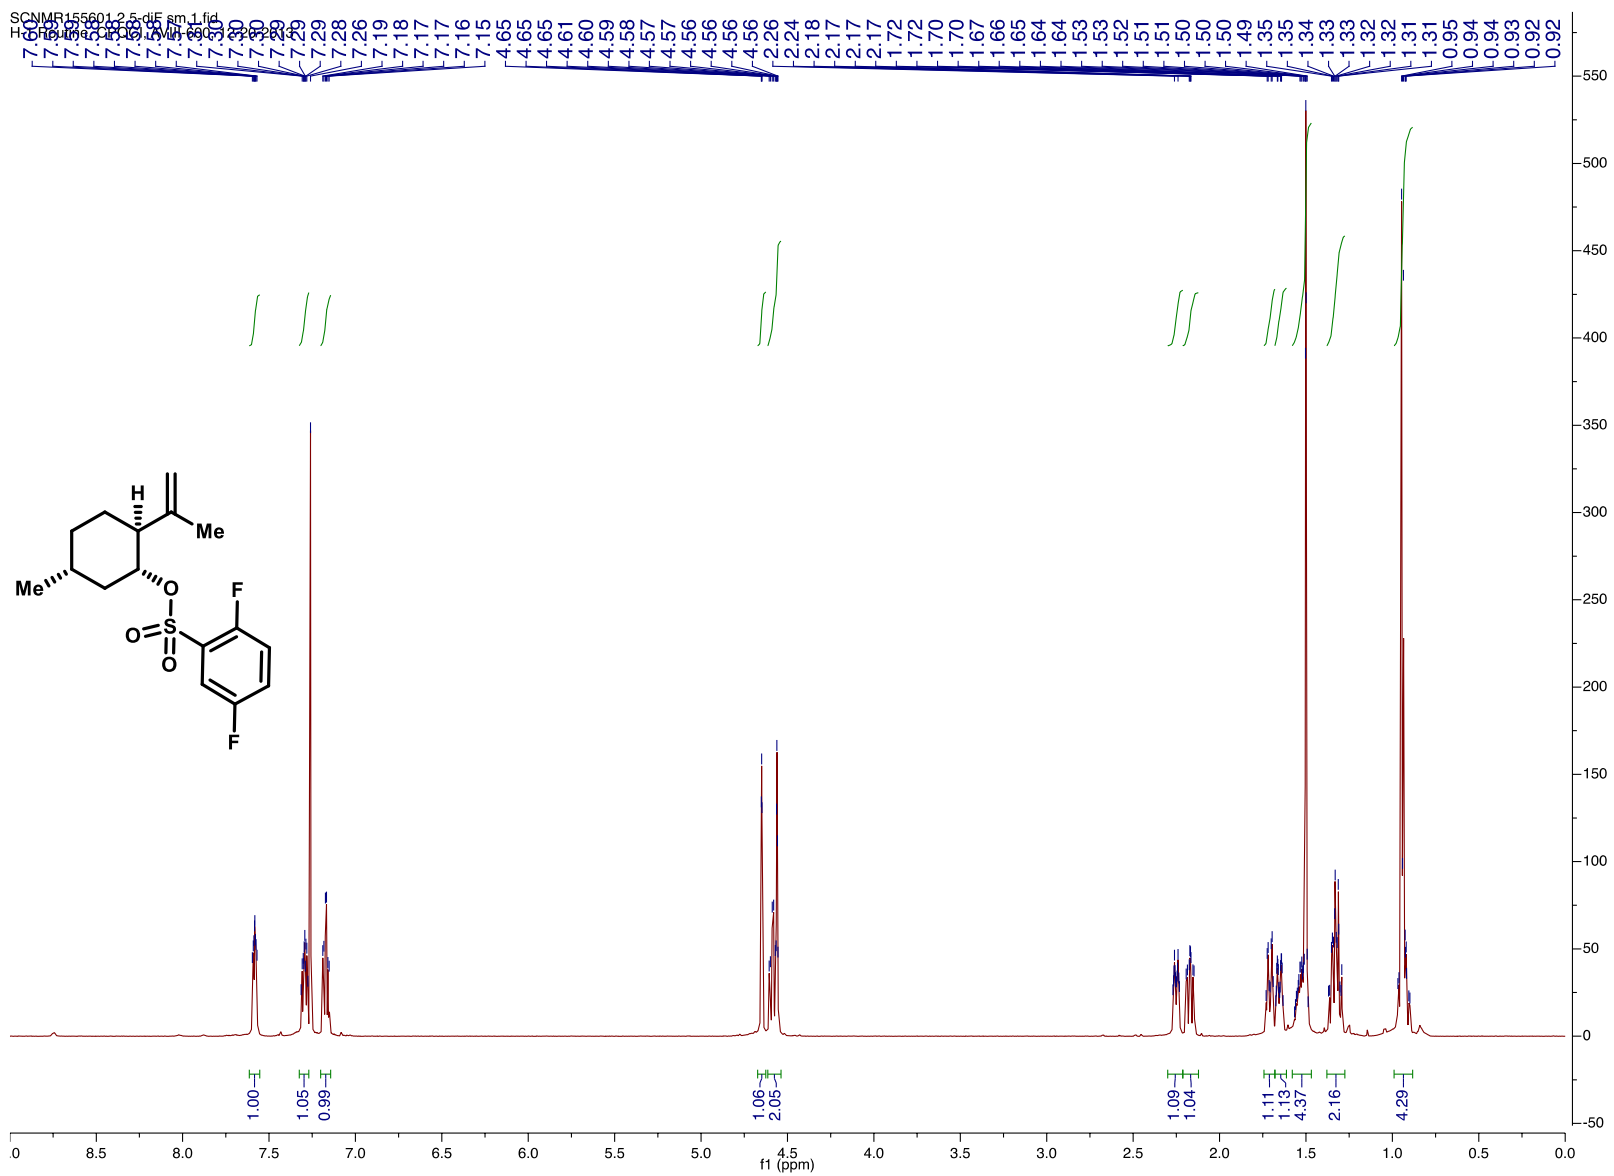

SI-08:  $^{13}\text{C}$ -NMR

SCNMR155601.4.fid  
C-13 Routine 1D, CPDCH CryoProbe, AVIII-600

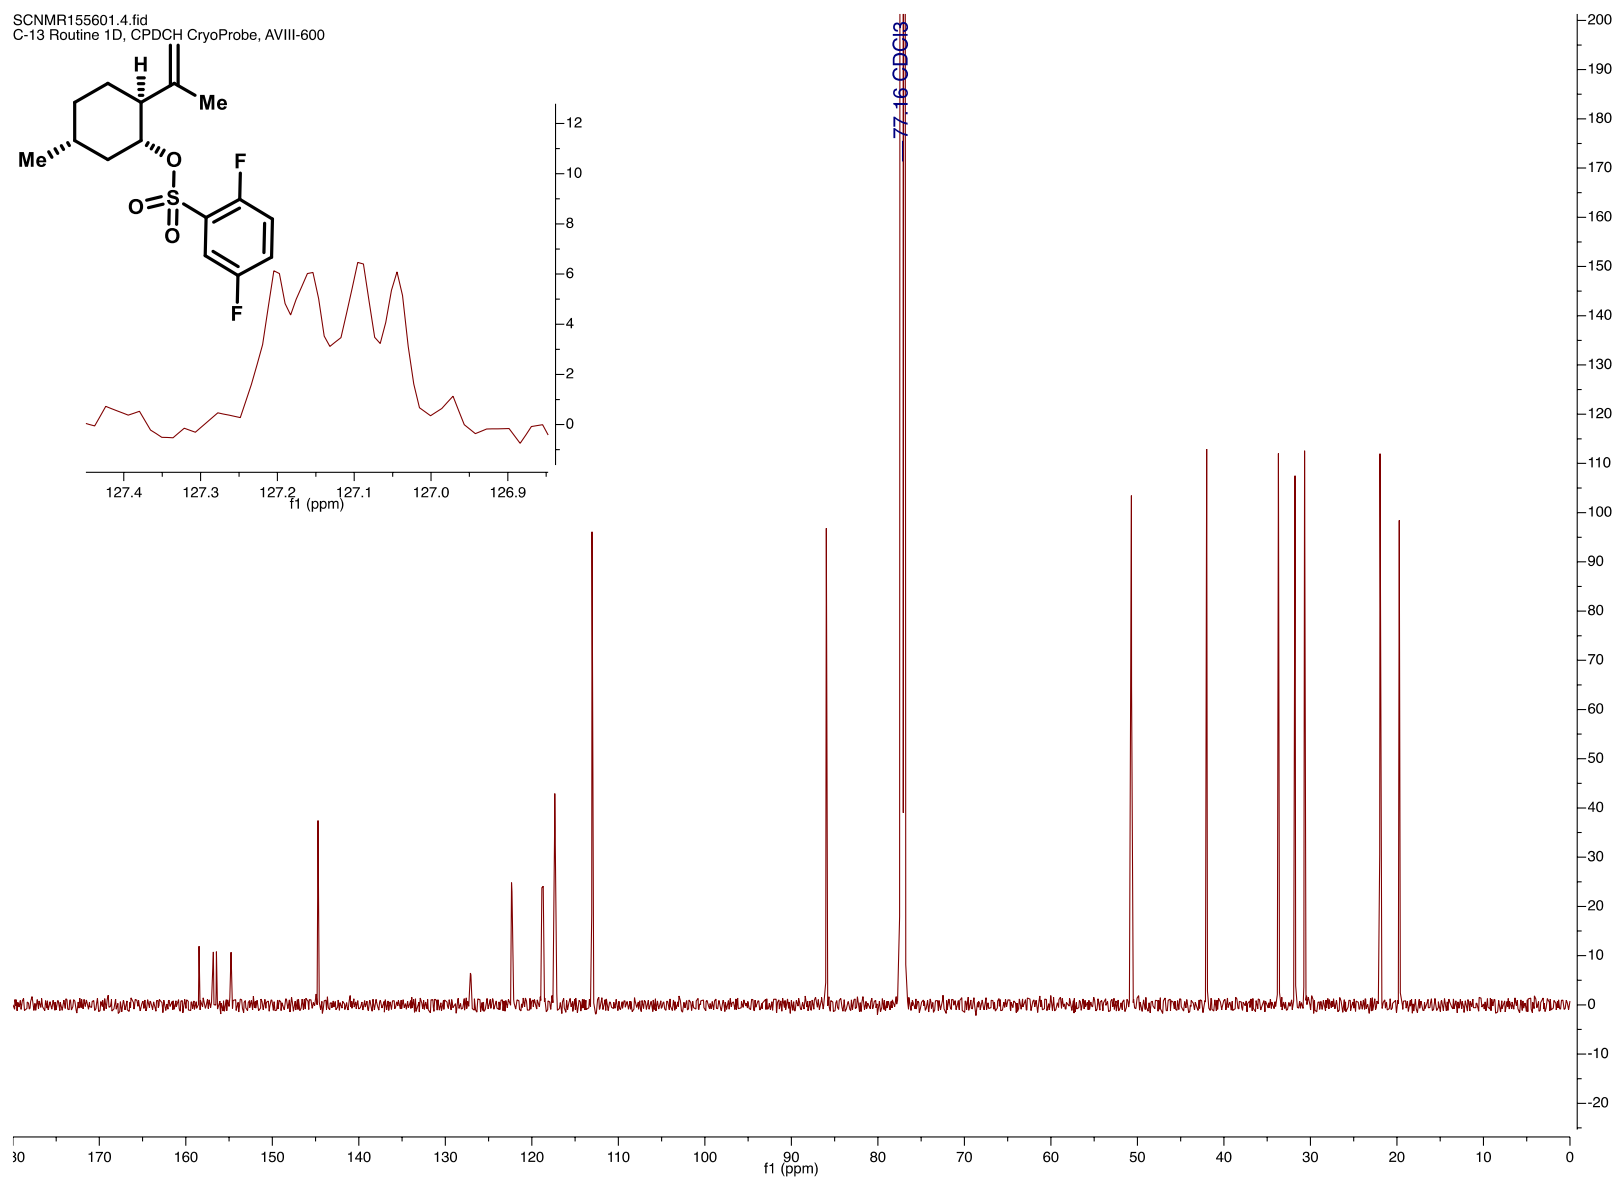

SCNMR155601 2,5-df sm.4.fid  
C-13 Routine 1D, CPDCH CryoProbe, AVIII-600

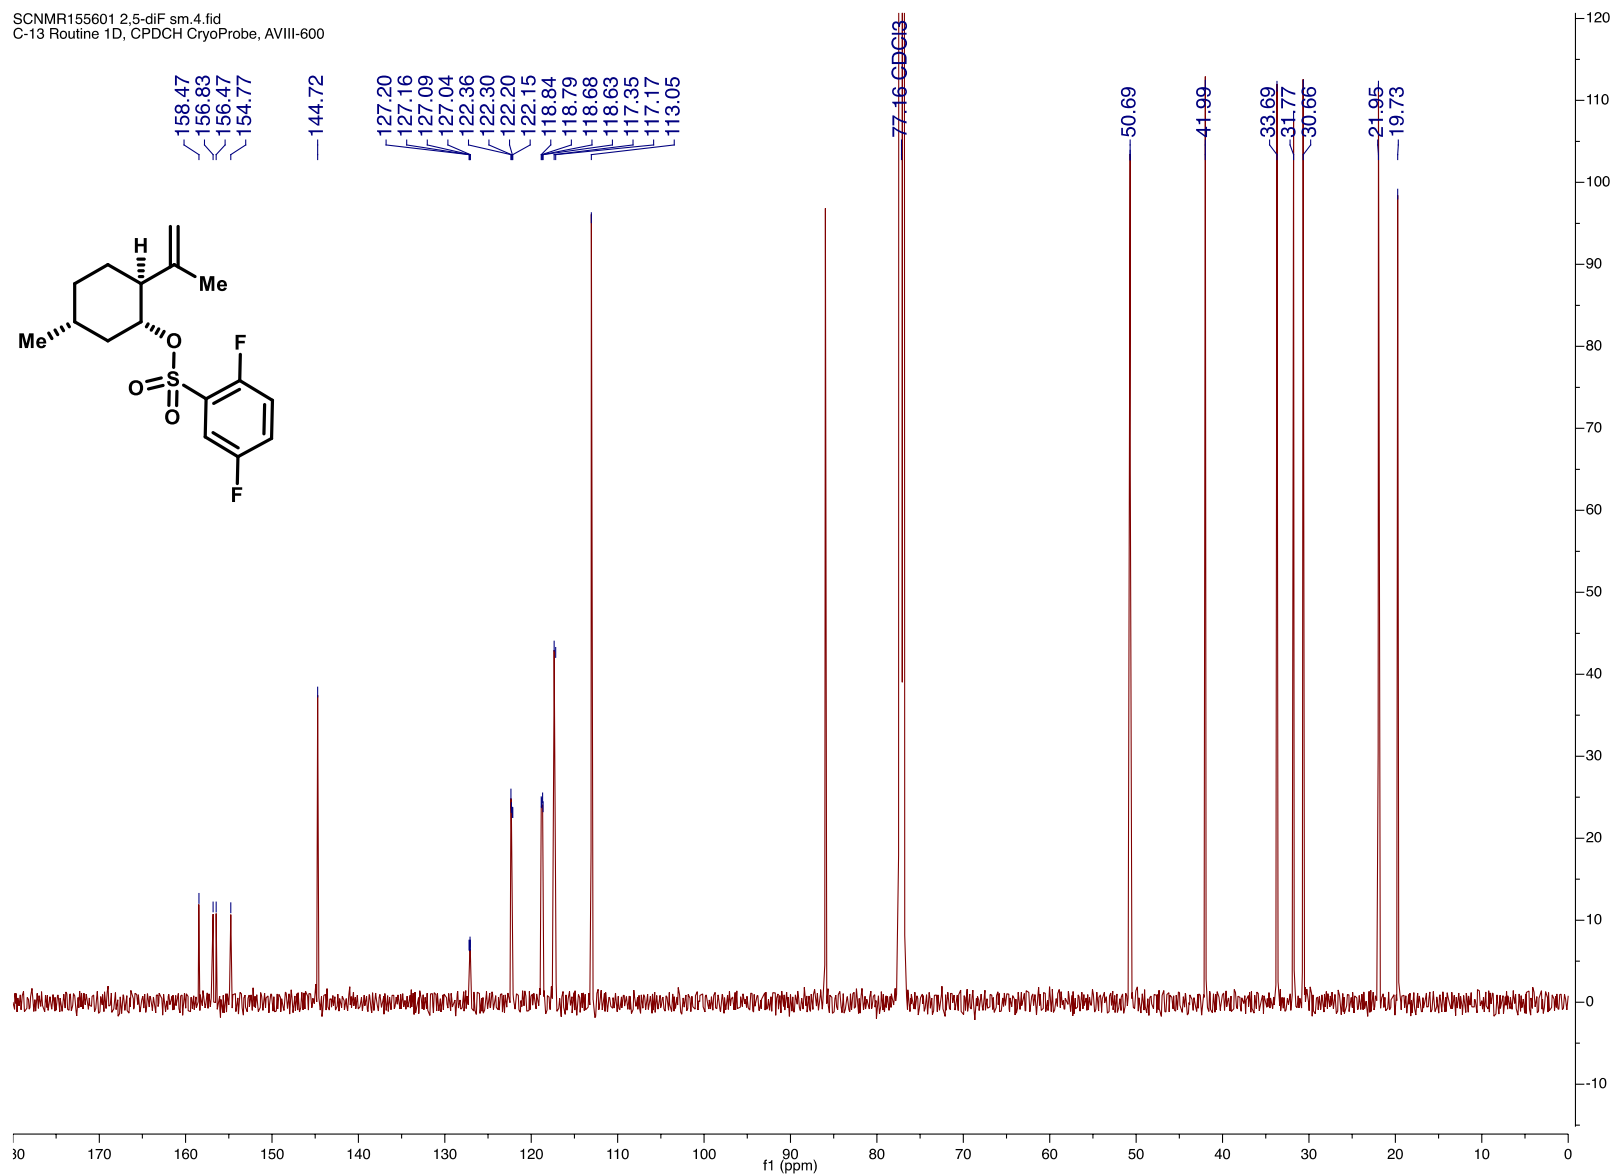

SI-08:  $^{19}\text{F}$ -NMR (Uncorrected)

SCNMR155601.3.fid  
F-19,  $\text{CDCl}_3$ , DPX-400 QNP Probe.  $\text{CF}_3\text{Cl}$  as Ref at 0 ppm.

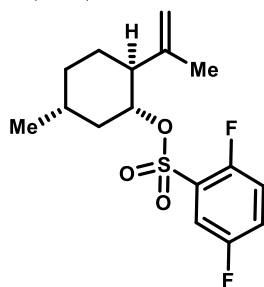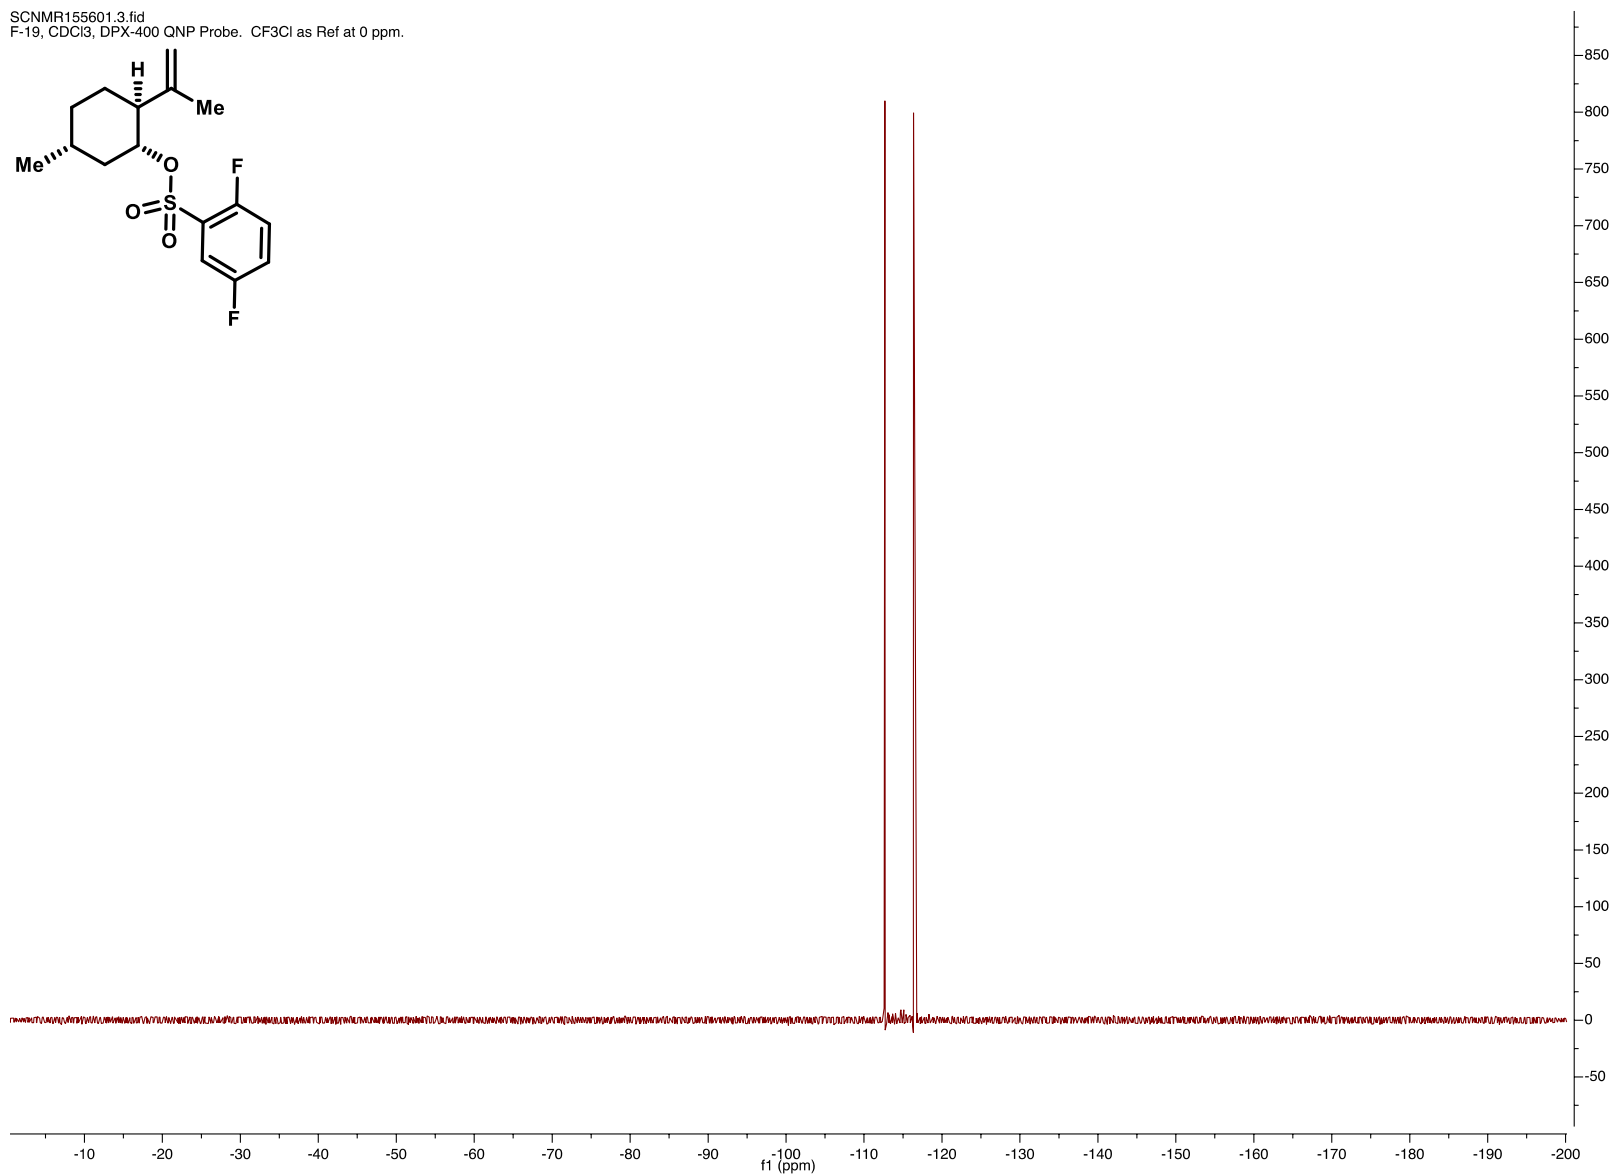

SCNMR155601 2,5-diF sm.3.fid  
F-19, CDCl<sub>3</sub>, DPX-400 QNP Probe. CF<sub>3</sub>Cl as Ref at 0 ppm.

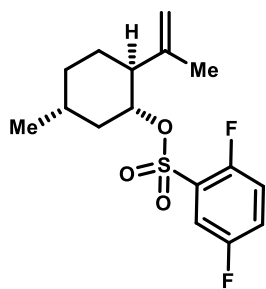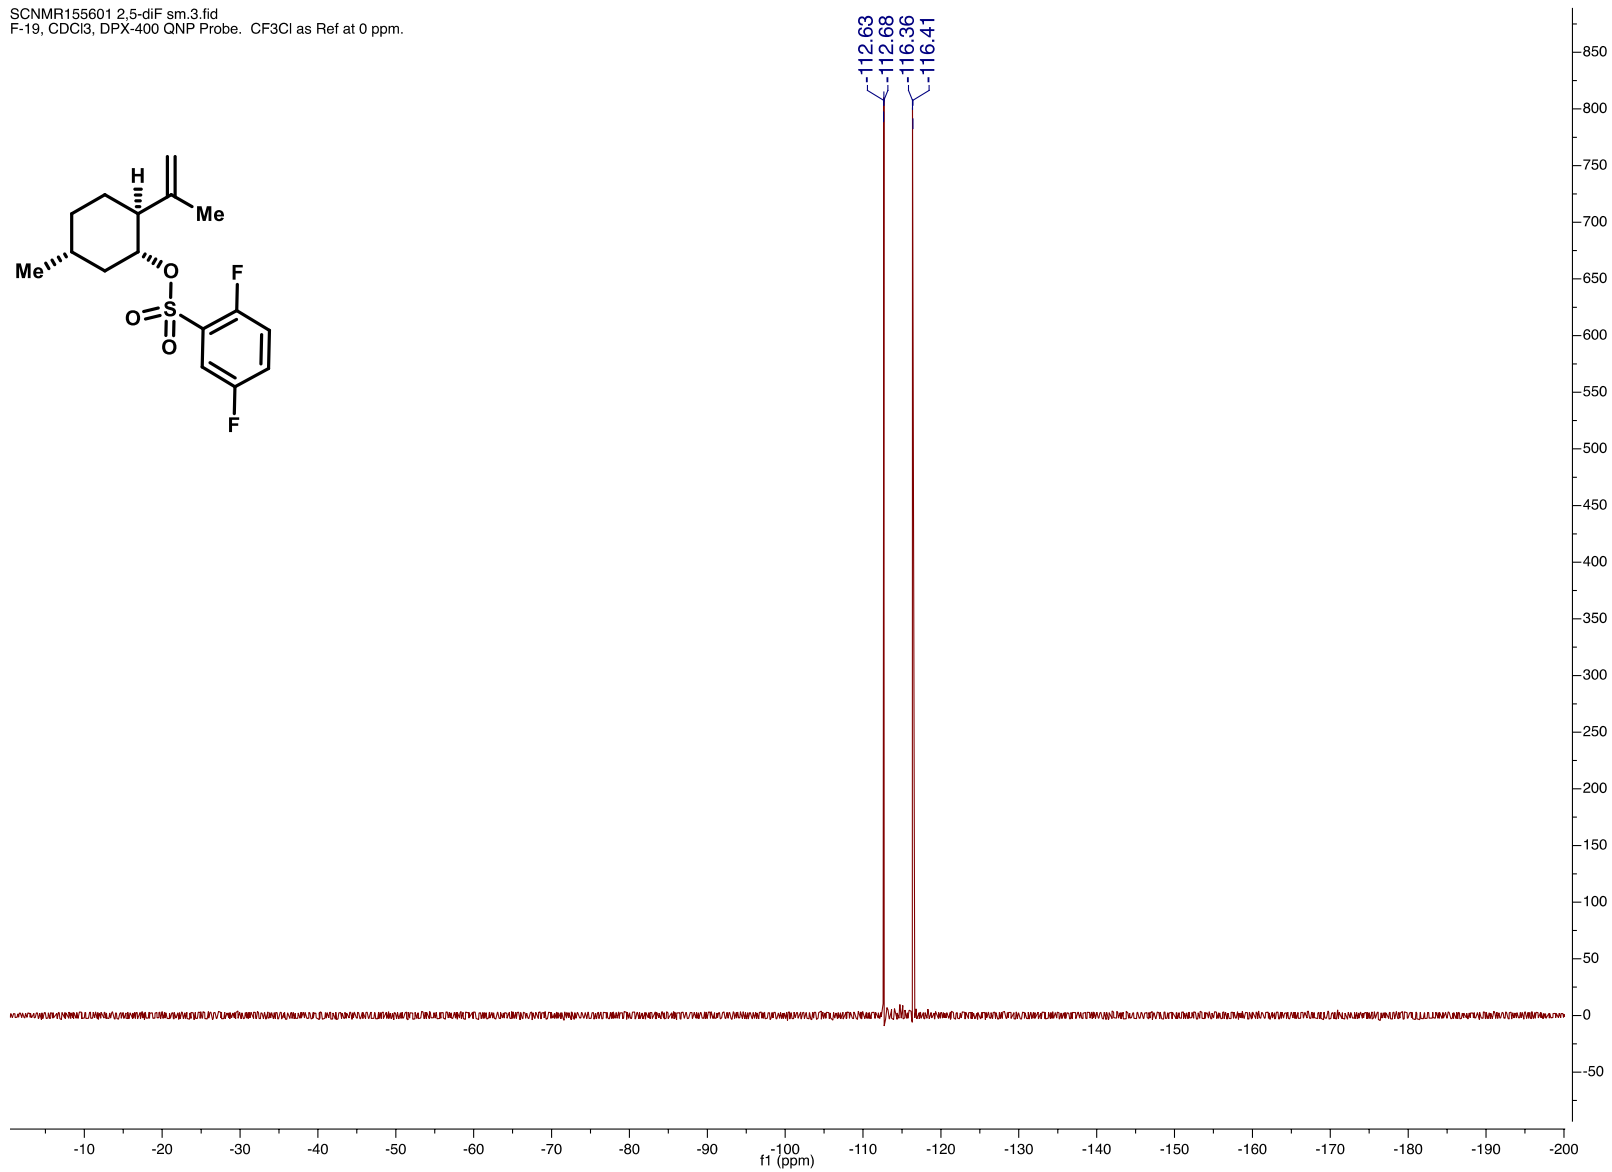



6c:  $^1\text{H}$ -NMR

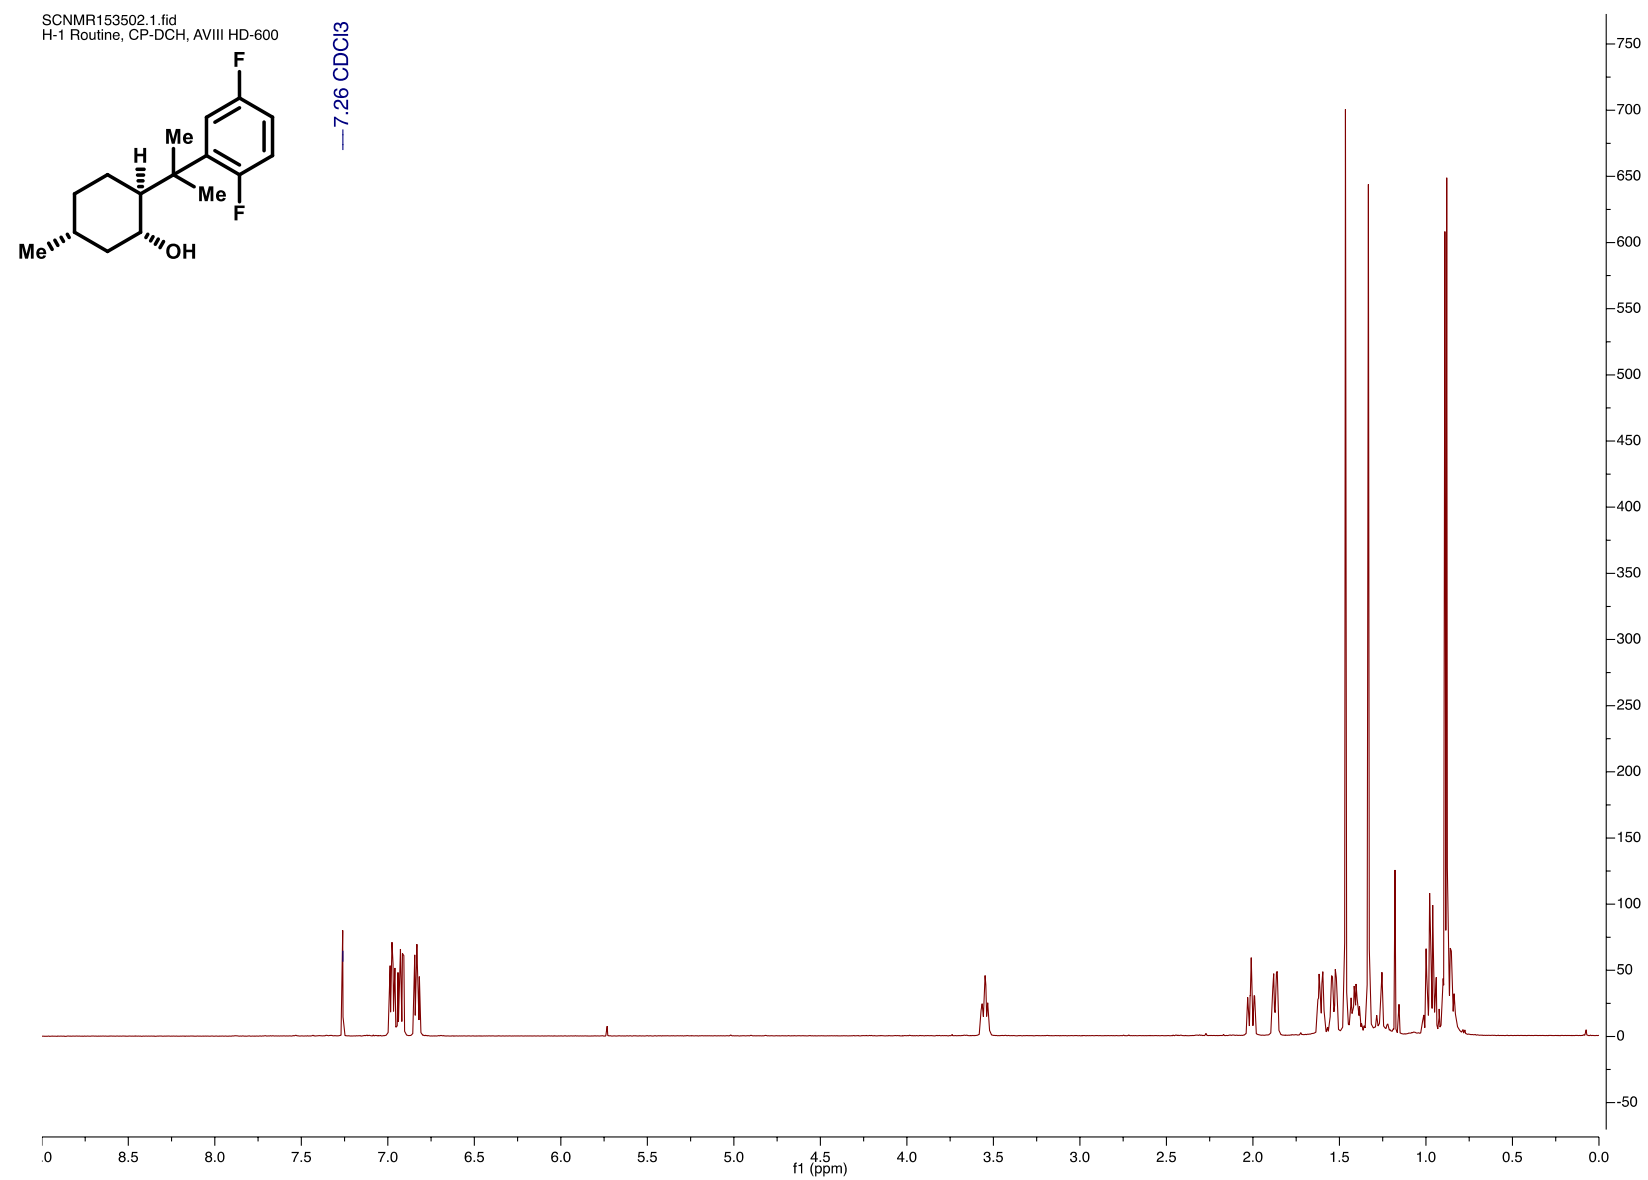

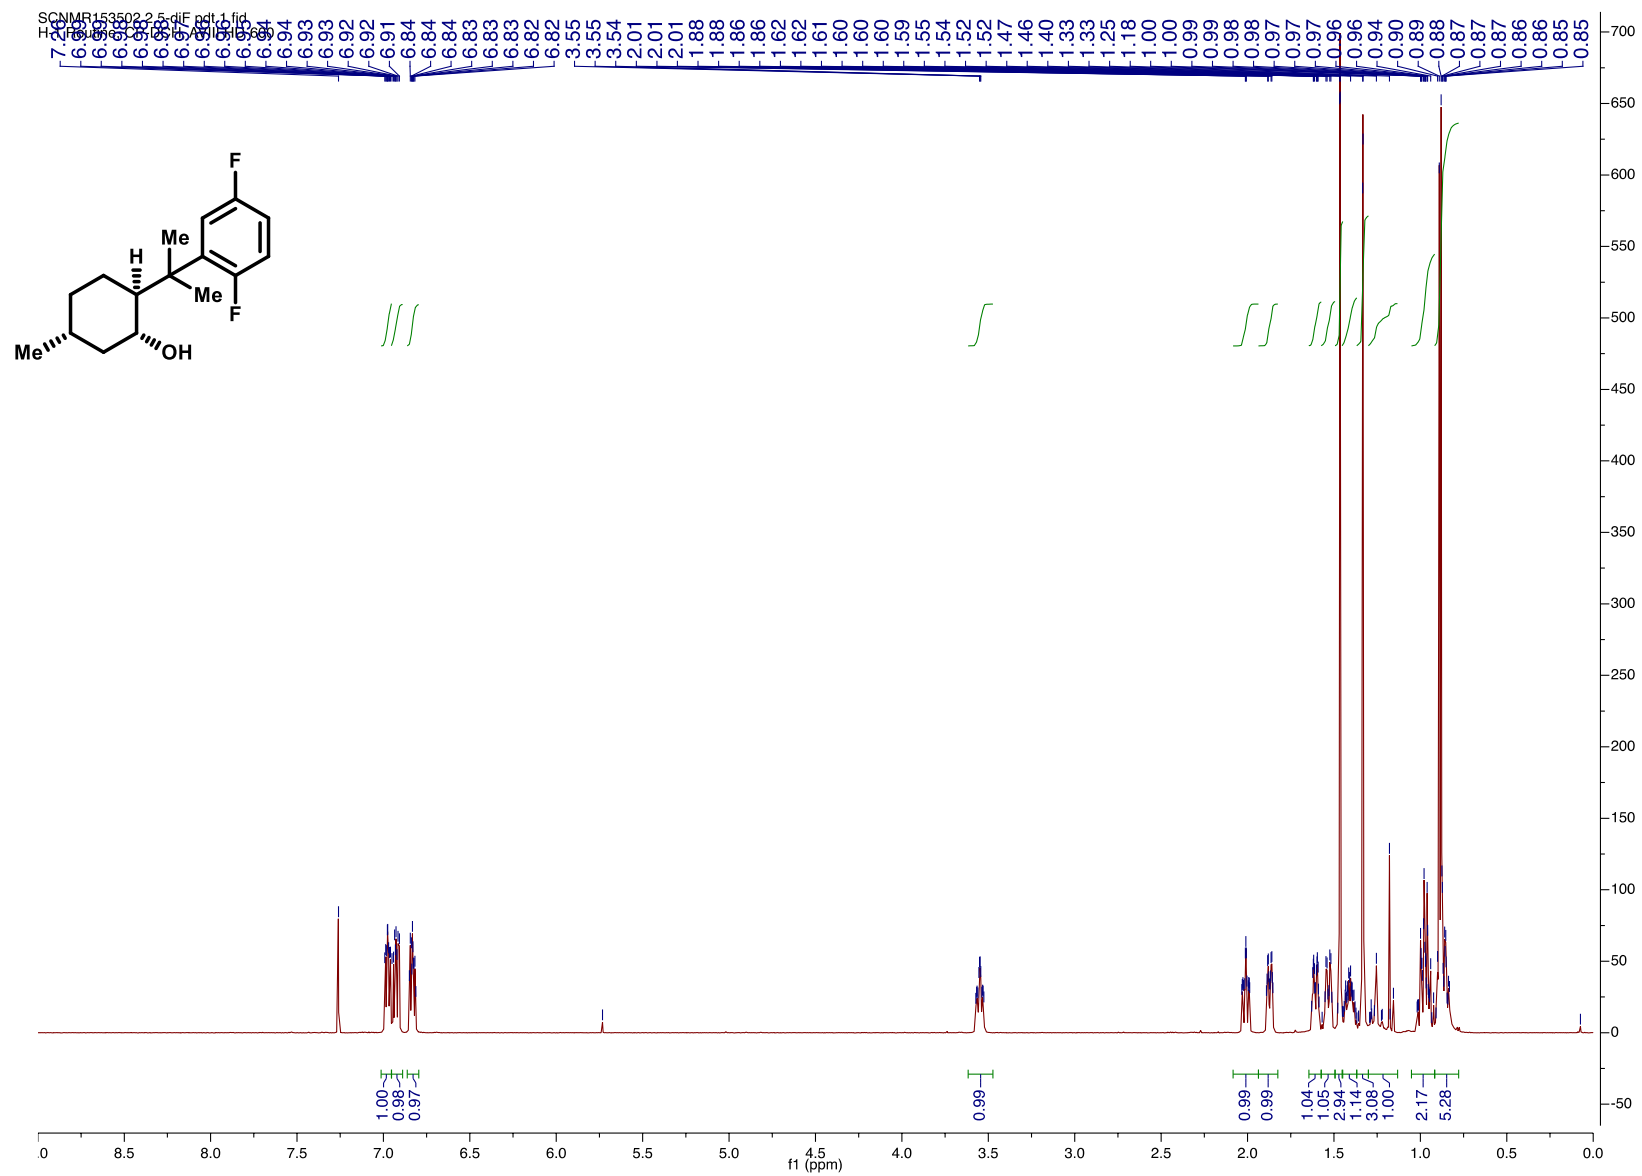

**6c:  $^{13}\text{C}$ -NMR**

SCNMR153502.2.fid  
C-13 Routine 1D, CPDCH CryoProbe, AVIII-600

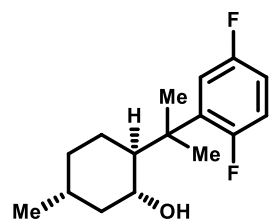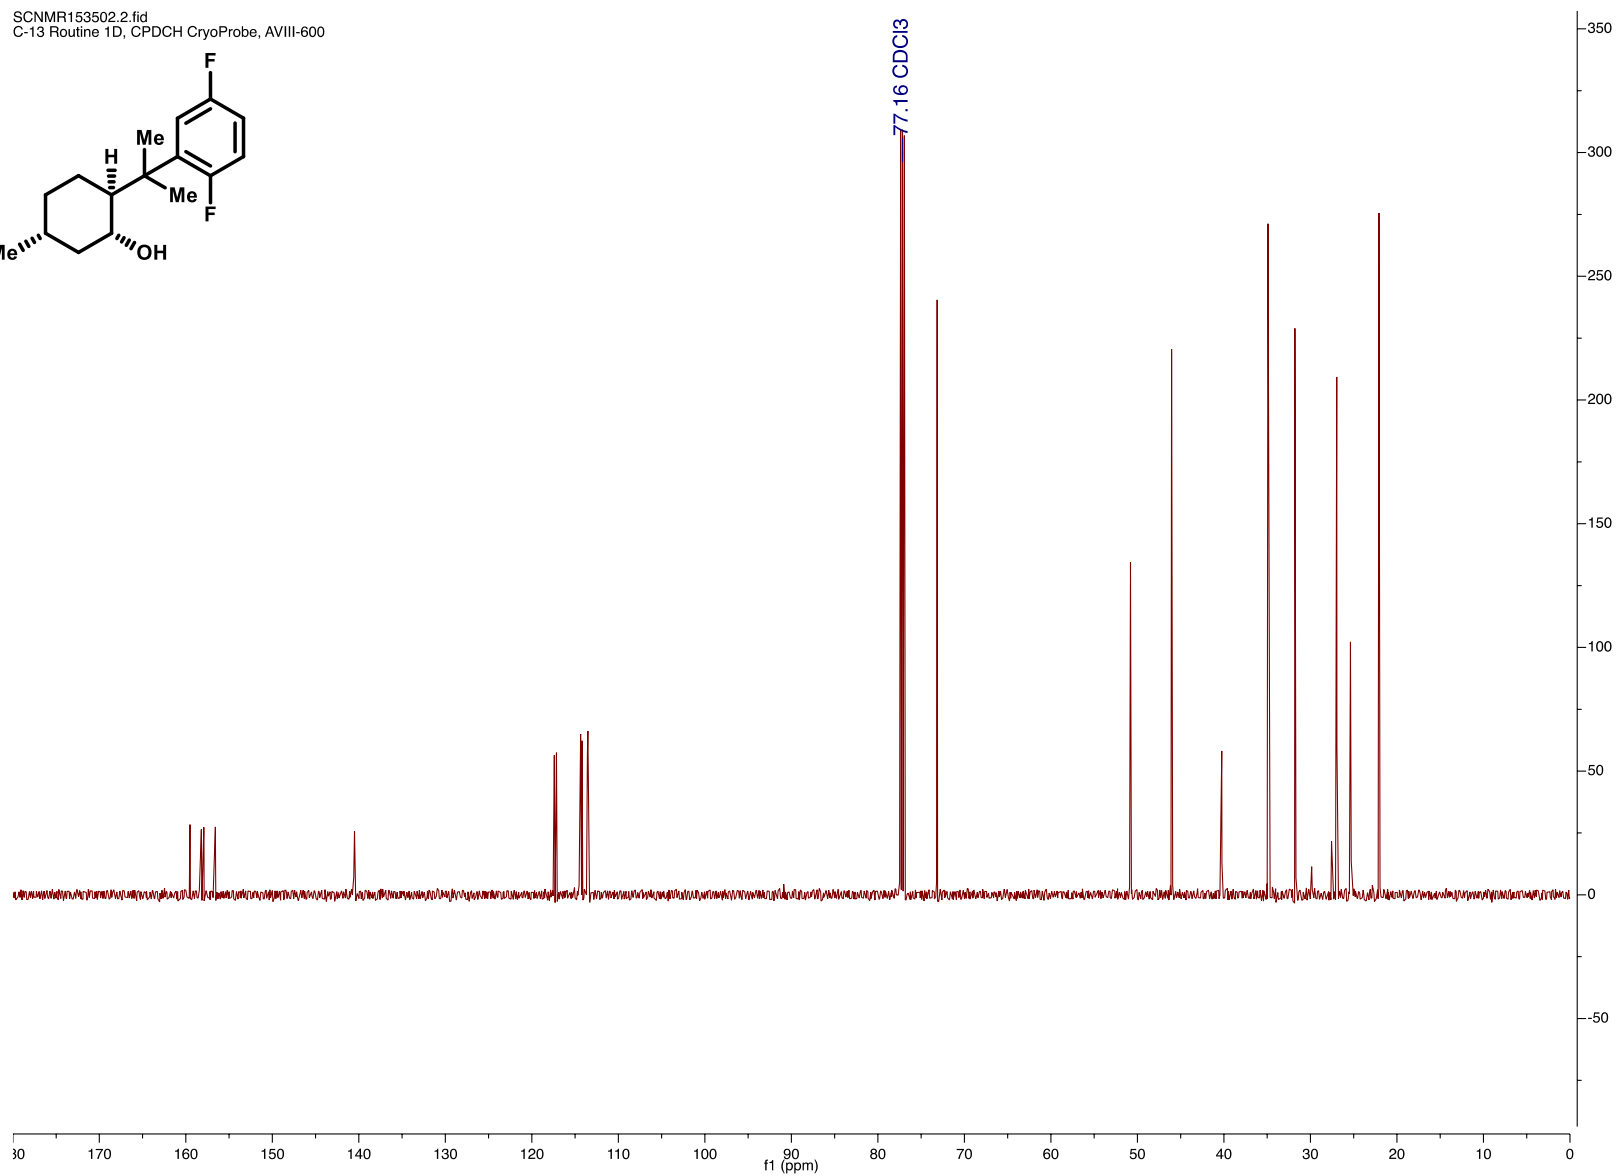

SCNMR153502 2,5-diF pdt.2.fid  
C-13 Routine 1D, CPDCH CryoProbe, AVIII-600

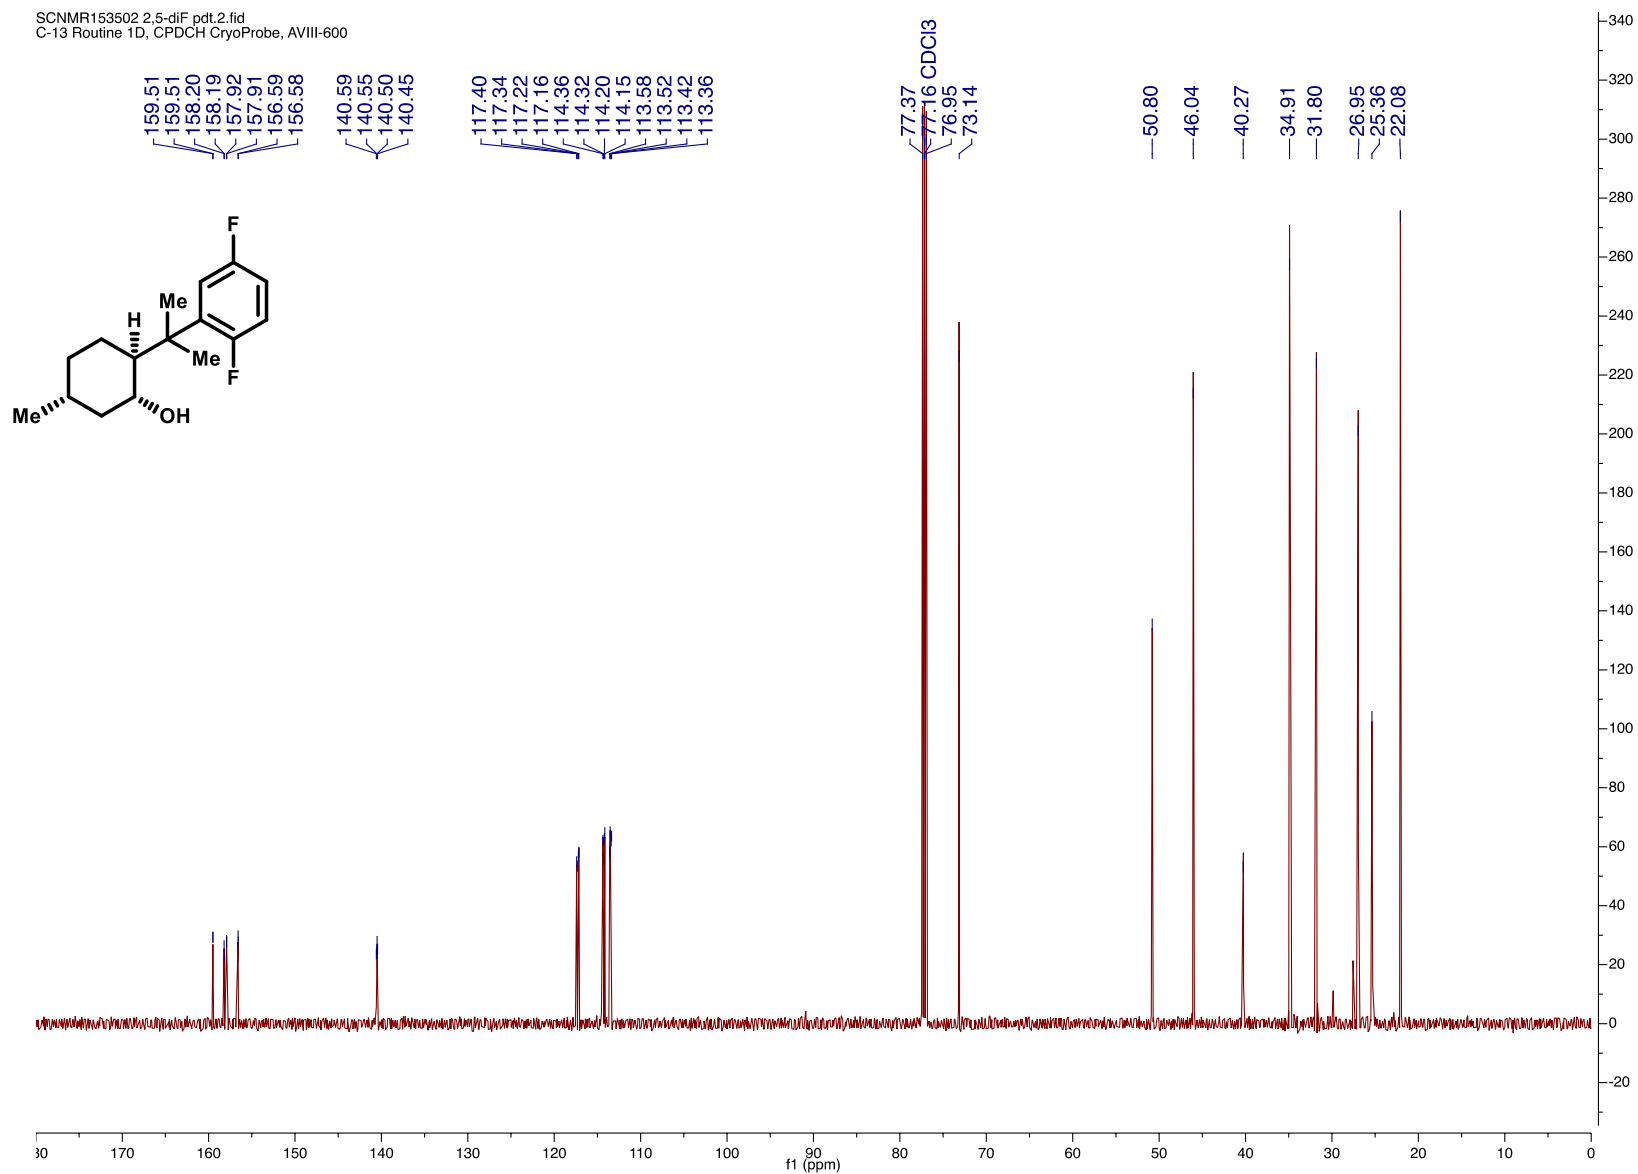

6c:  $^{19}\text{F}$ -NMR (Uncorrected)

SCNMR153502.4.fid  
F-19,  $\text{CDCl}_3$ , DPX-400 QNP Probe.  $\text{CF}_3\text{Cl}$  as Ref at 0 ppm.

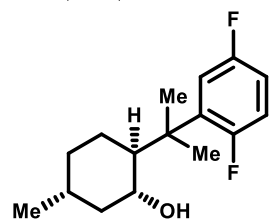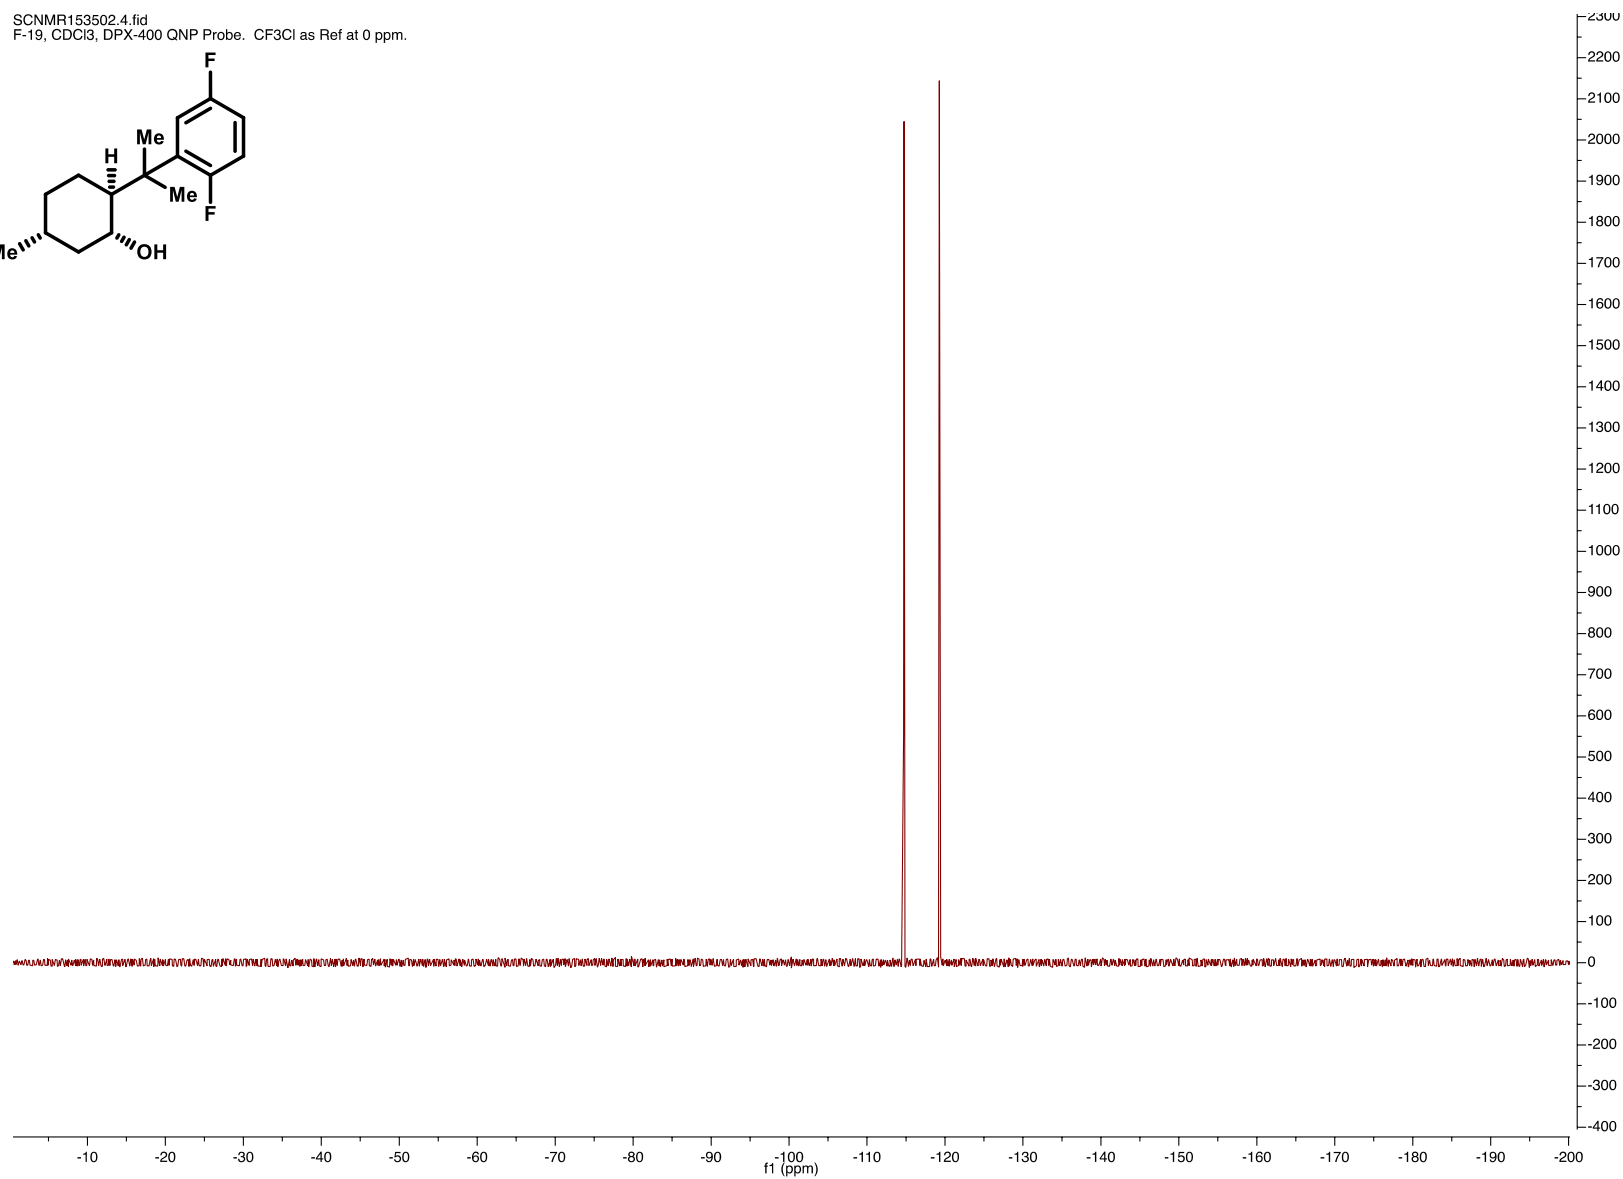

SCNMR153502 2,5-diF pdt.4.fid  
F-19, CDCl<sub>3</sub>, DPX-400 QNP Probe. CF<sub>3</sub>Cl as Ref at 0 ppm.

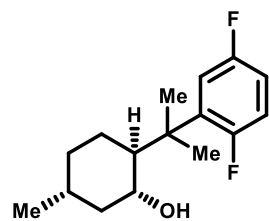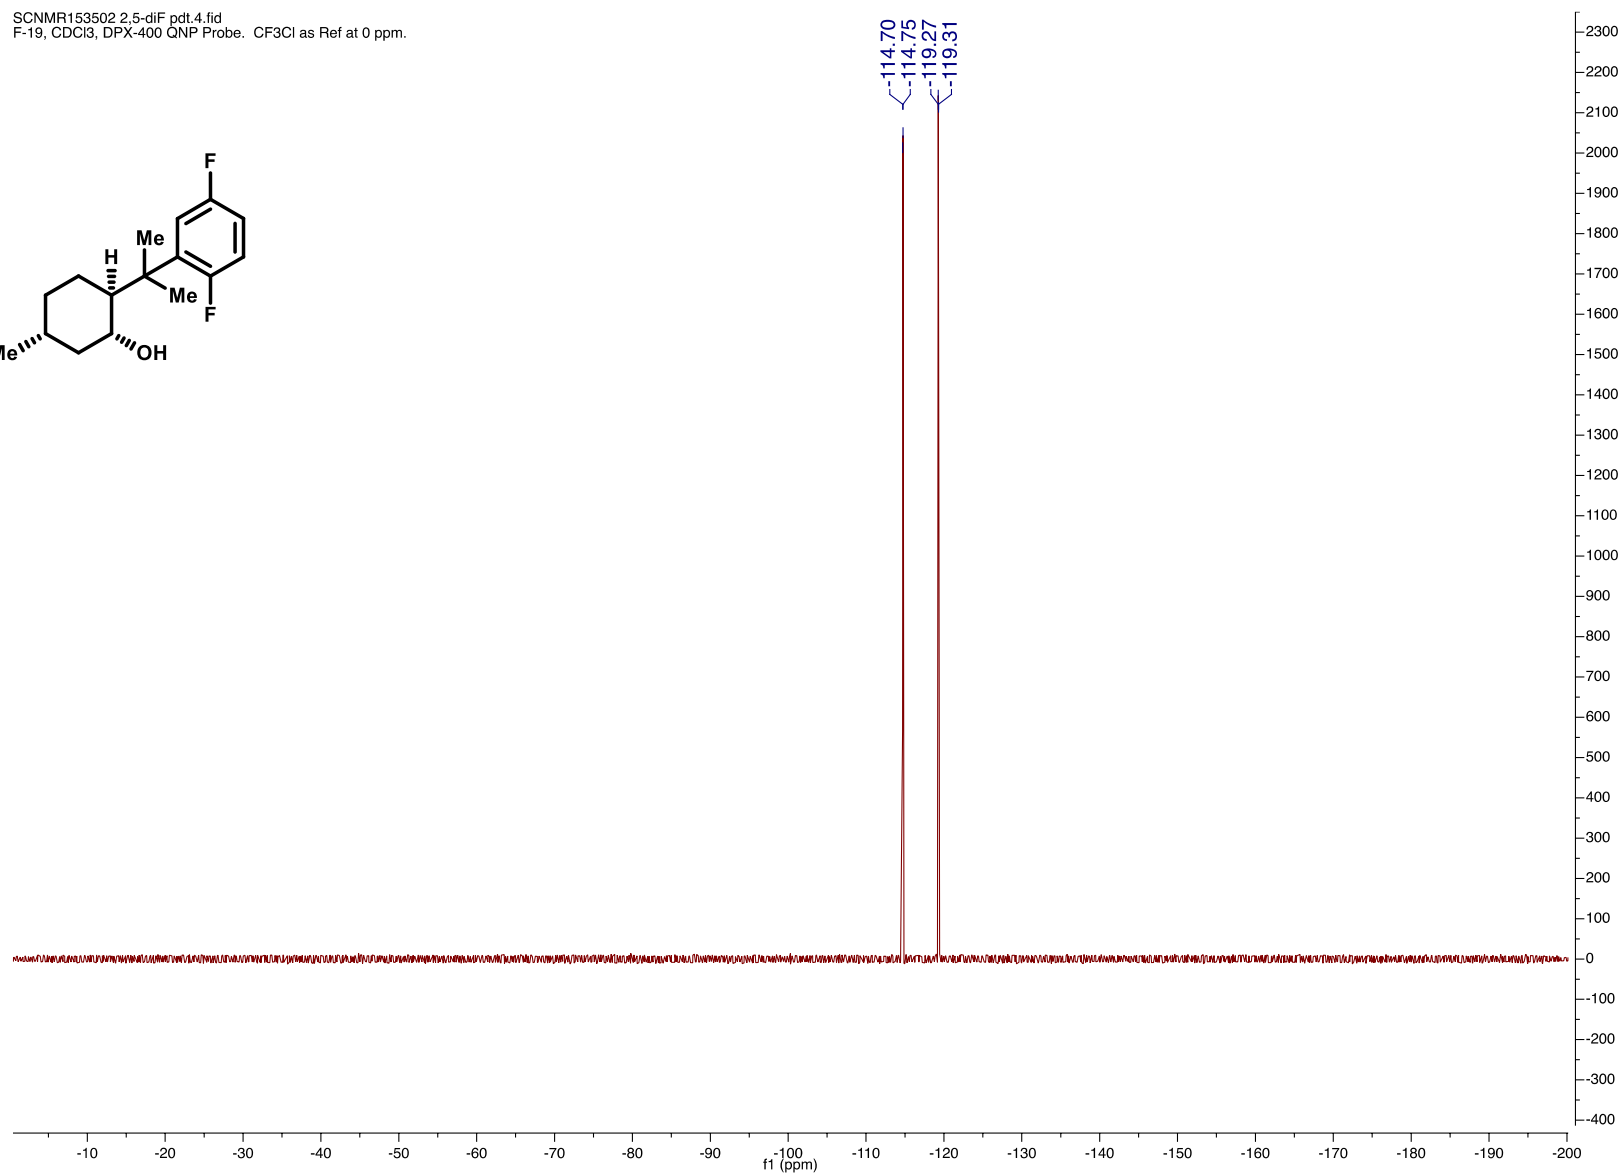

SI-09:  $^1\text{H}$ -NMR

sgz1-187-c.1.fid  
H-1 Routine, DRX-500, BBO Probe

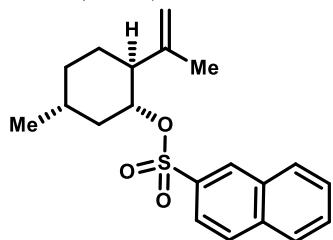

— 7.26 CDCl<sub>3</sub>

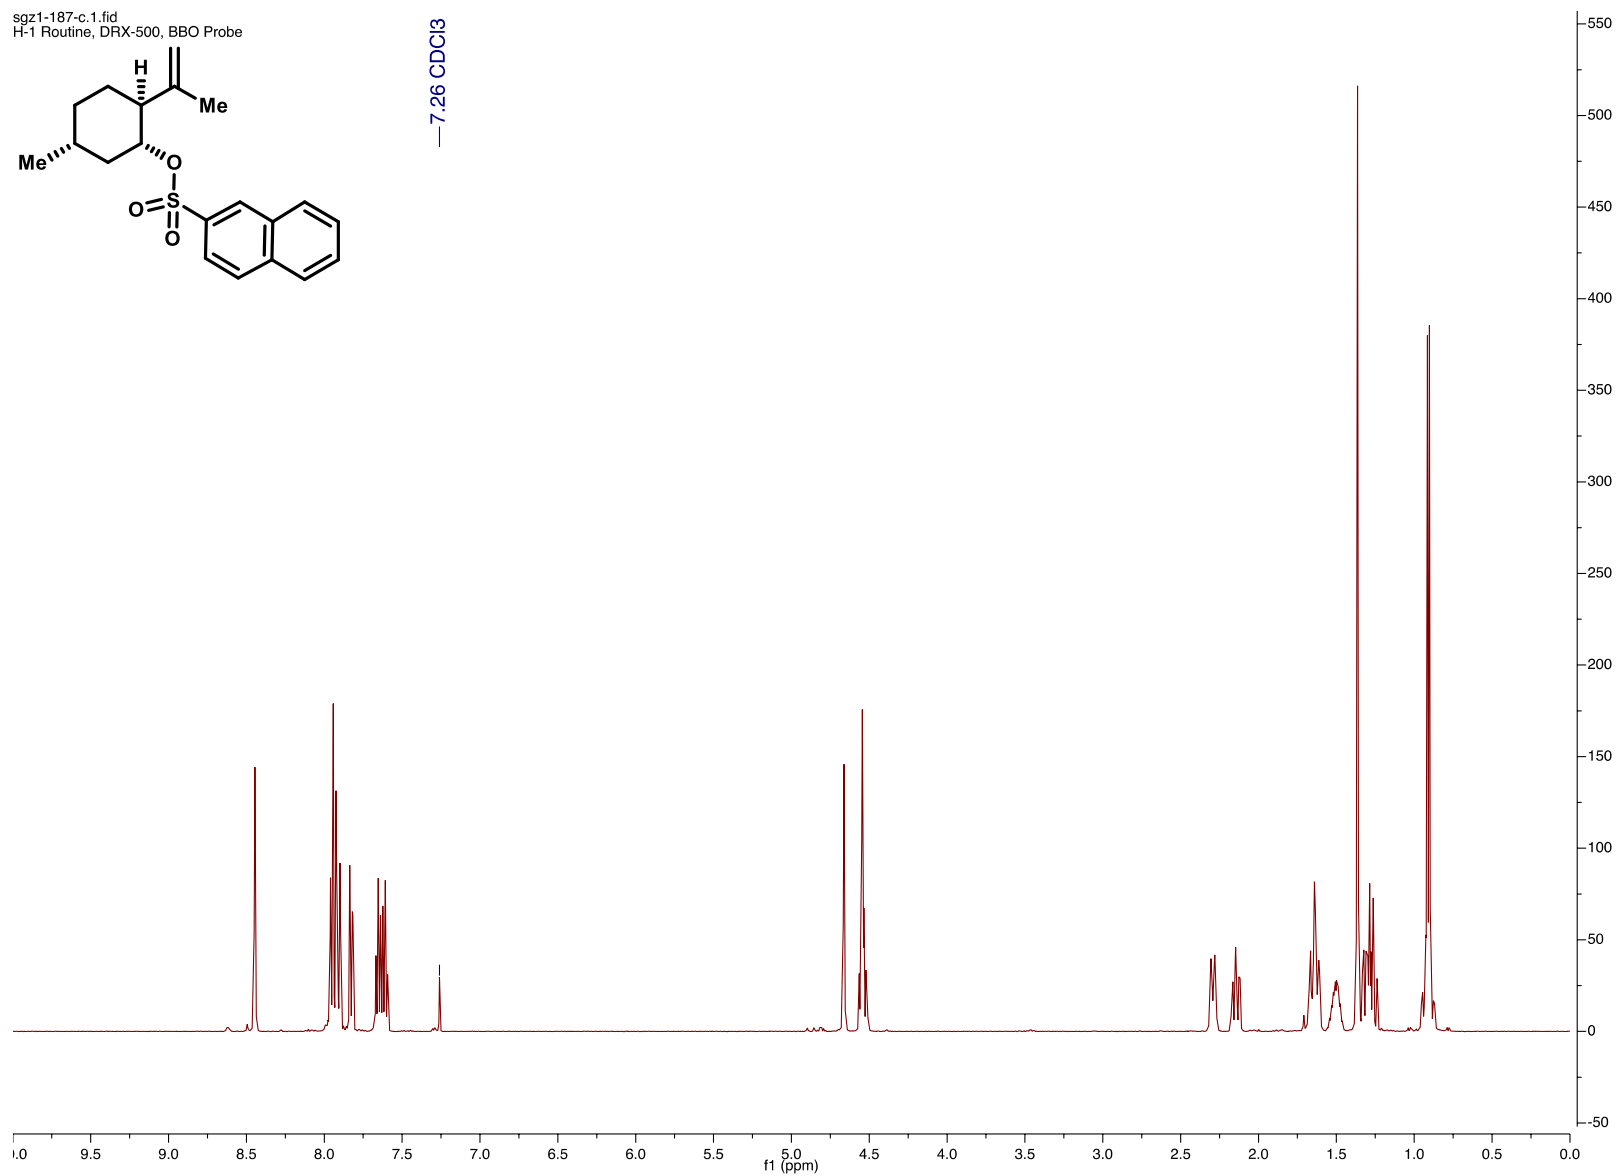

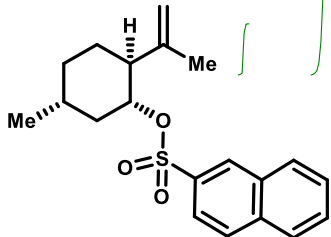



SI-09:  $^{13}\text{C}$ -NMR

sgz1-187-c.2.fid  
C-13 Routine, BBO Probe, DRX-500

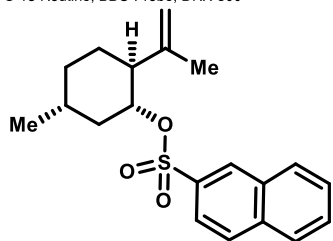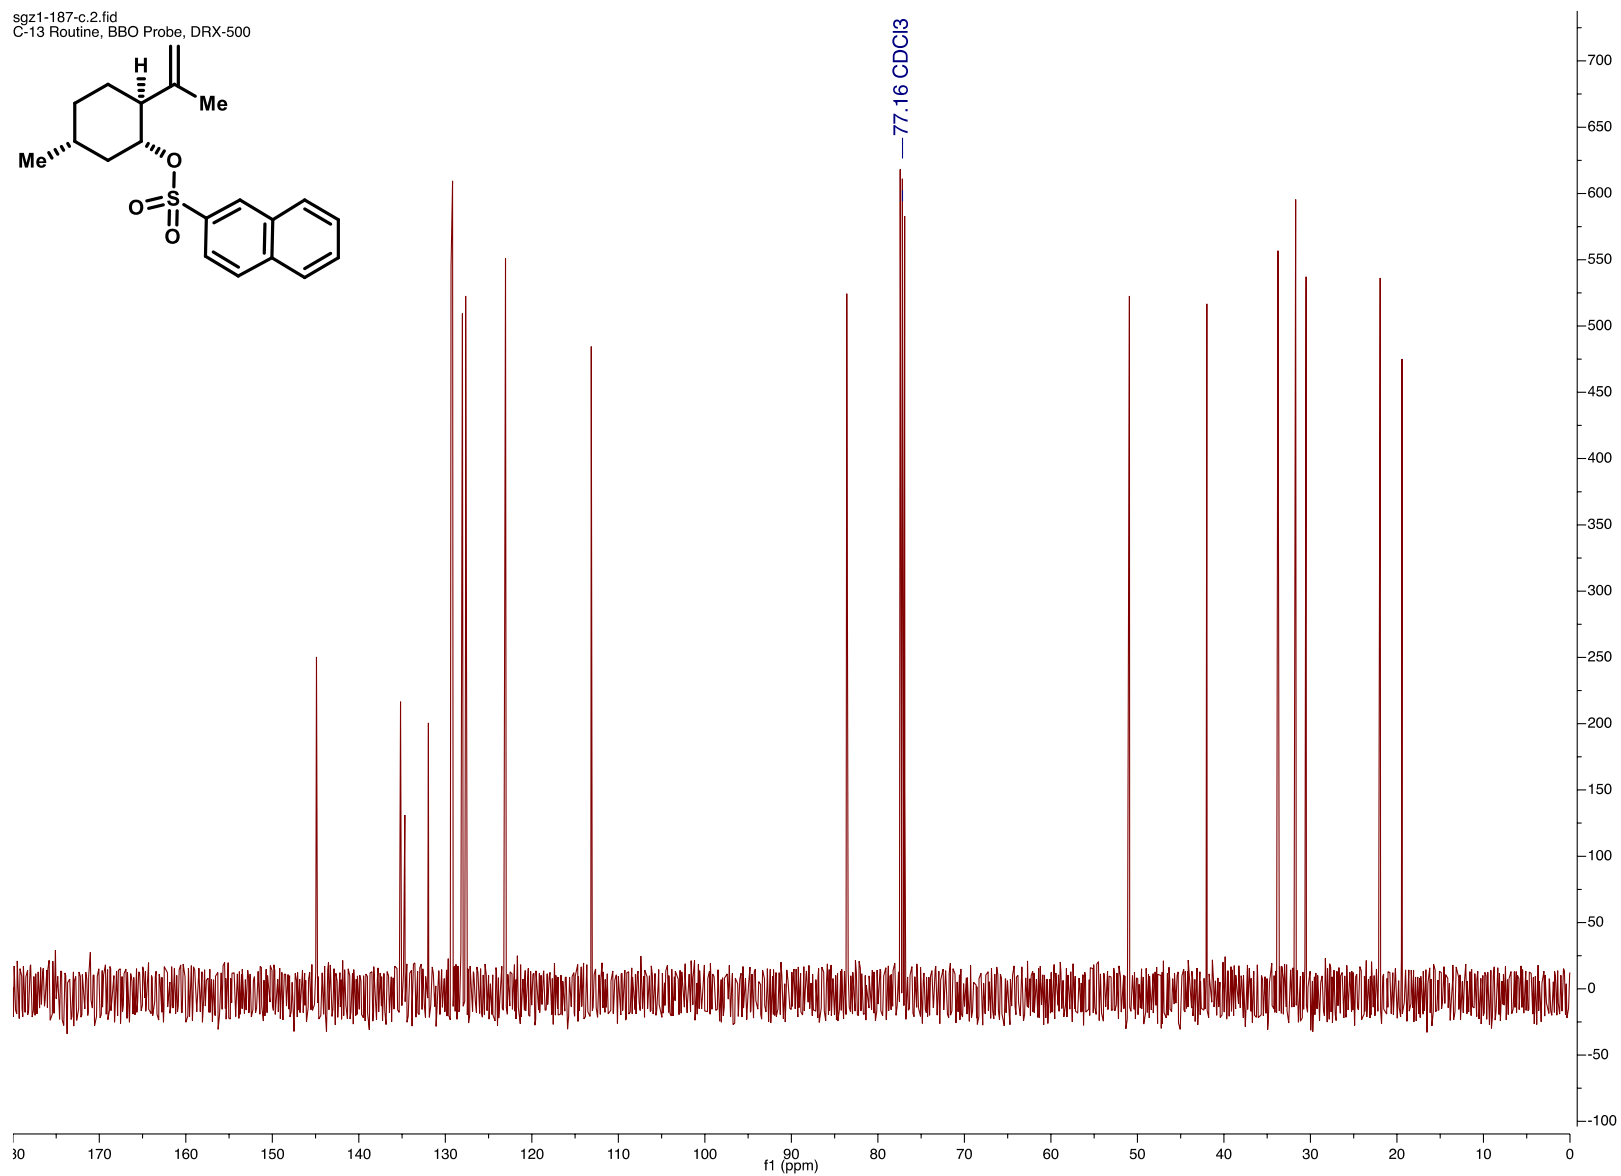

sgz1-187-c.2.fid  
C-13 Routine, BBO Probe, DRX-500

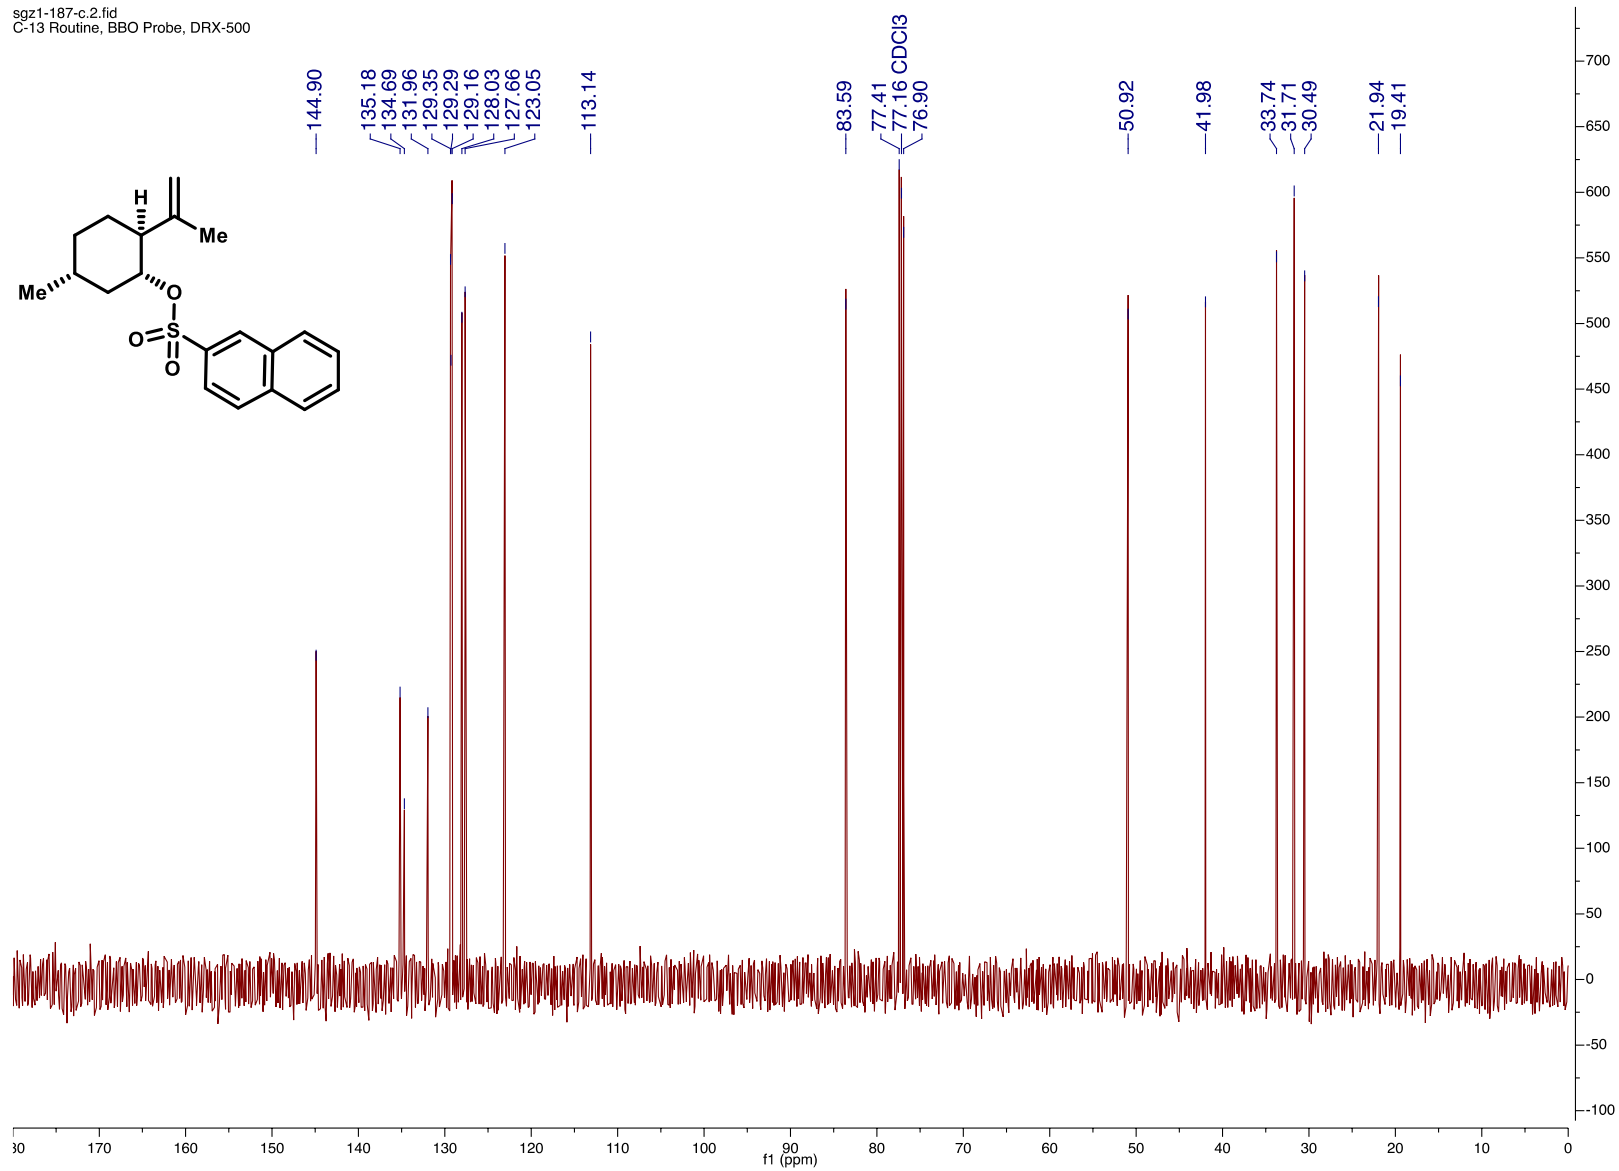

## 7: <sup>1</sup>H-NMR

SCNMR136402 2-naphthyl product.1.fid  
H-1 Routine, CP-DCH, AVIII HD-600

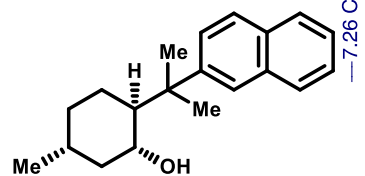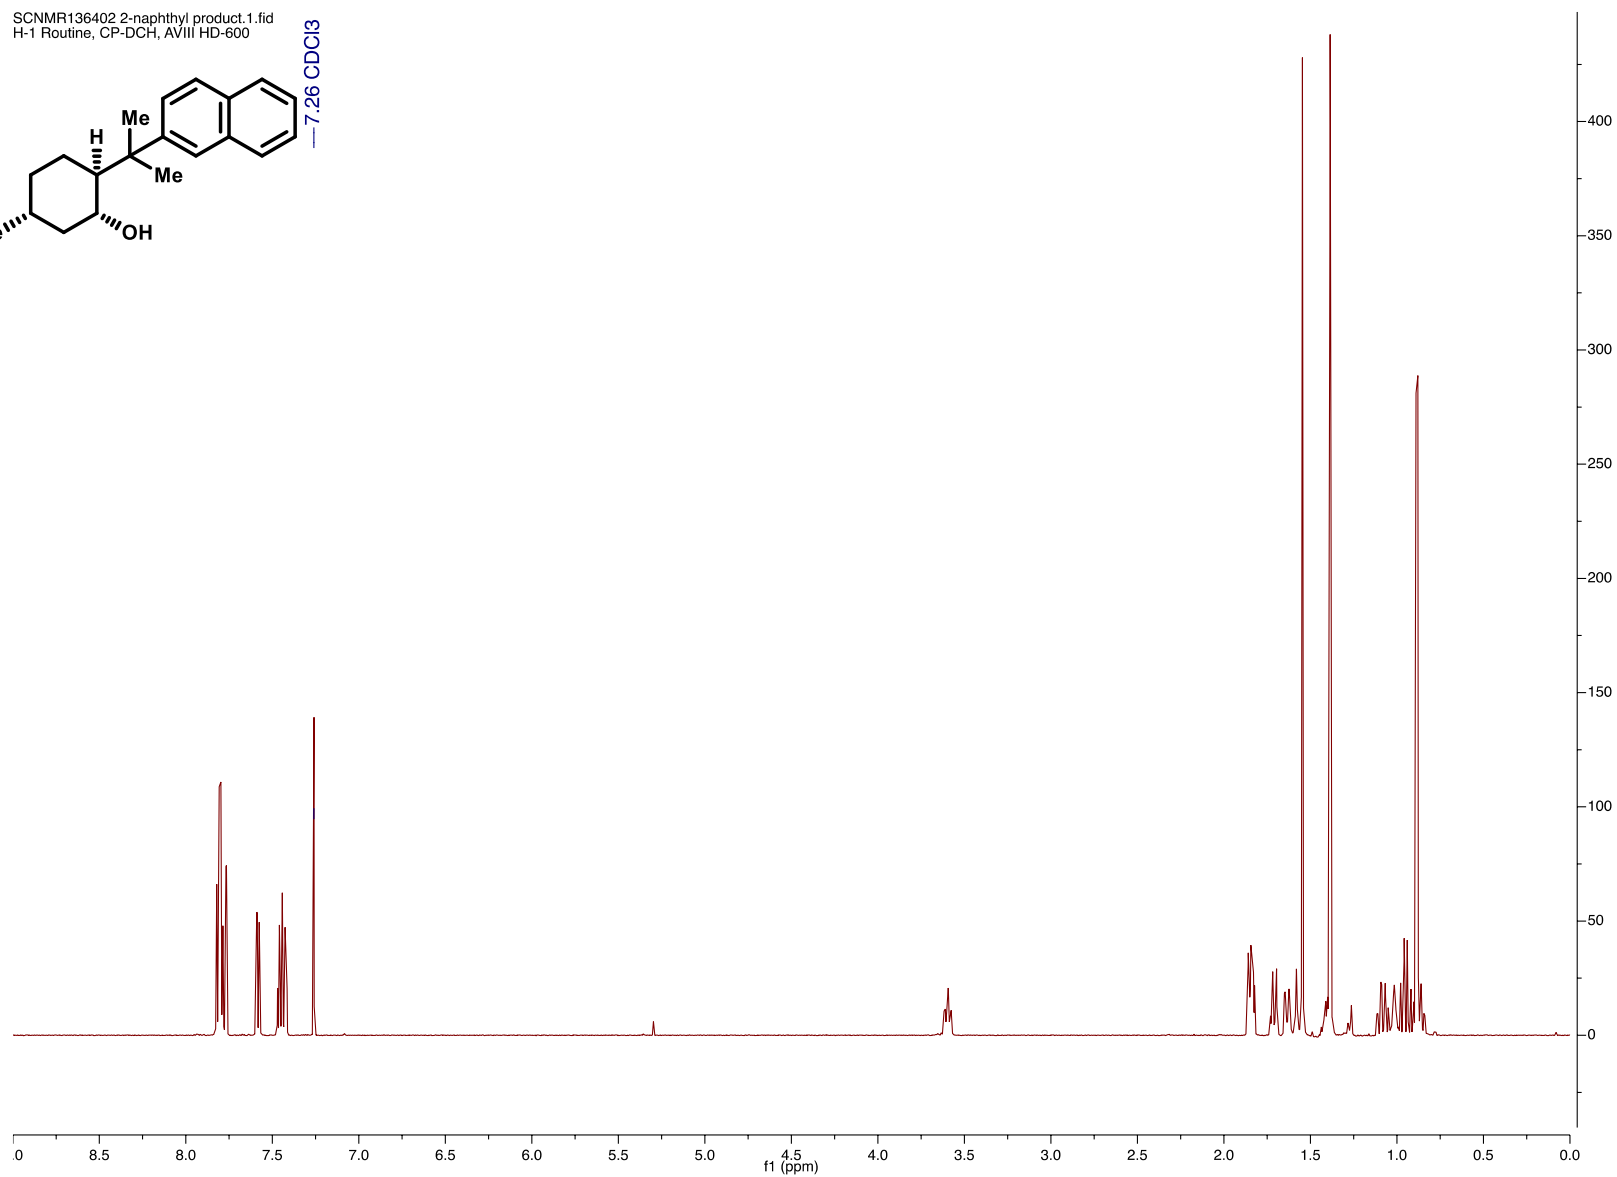

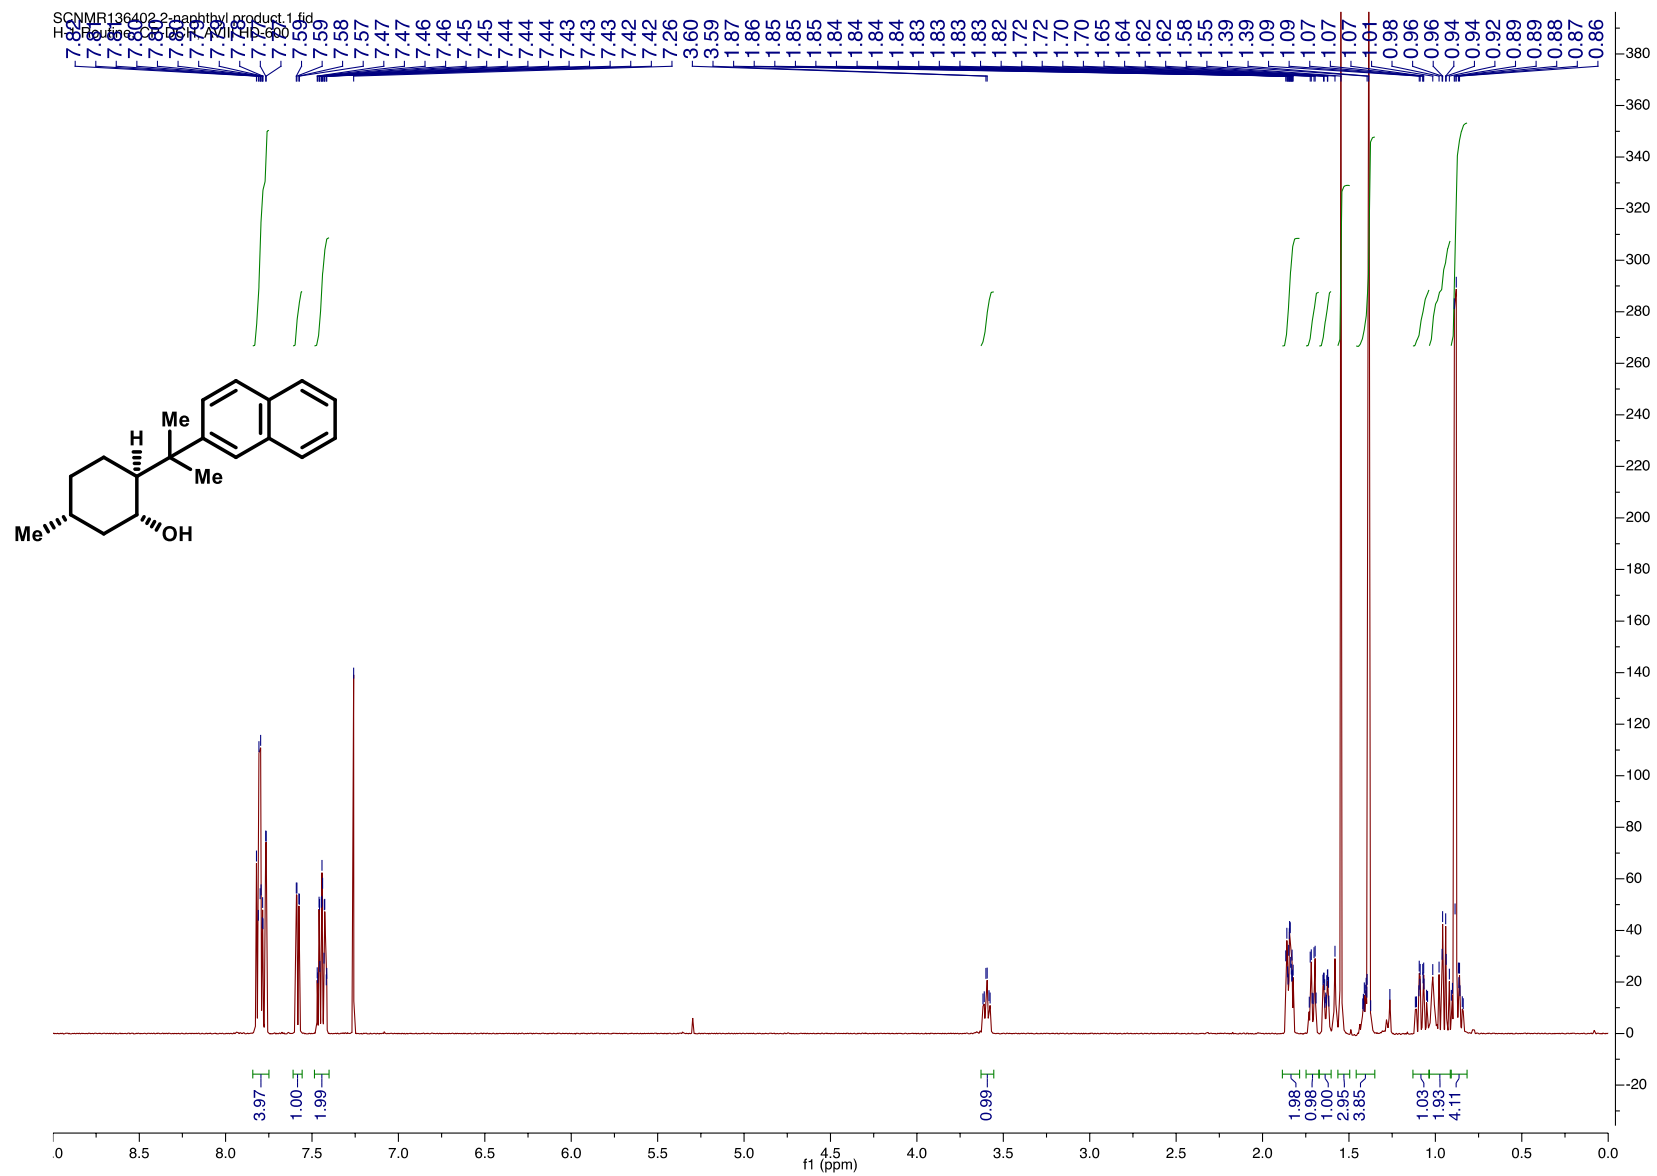

7:  $^{13}\text{C}$ -NMR

SCNMR136402 2-naphthyl product.2.fid  
C-13 Routine 1D, CPDCH CryoProbe, AVIII-600

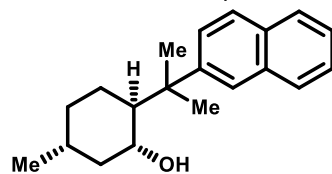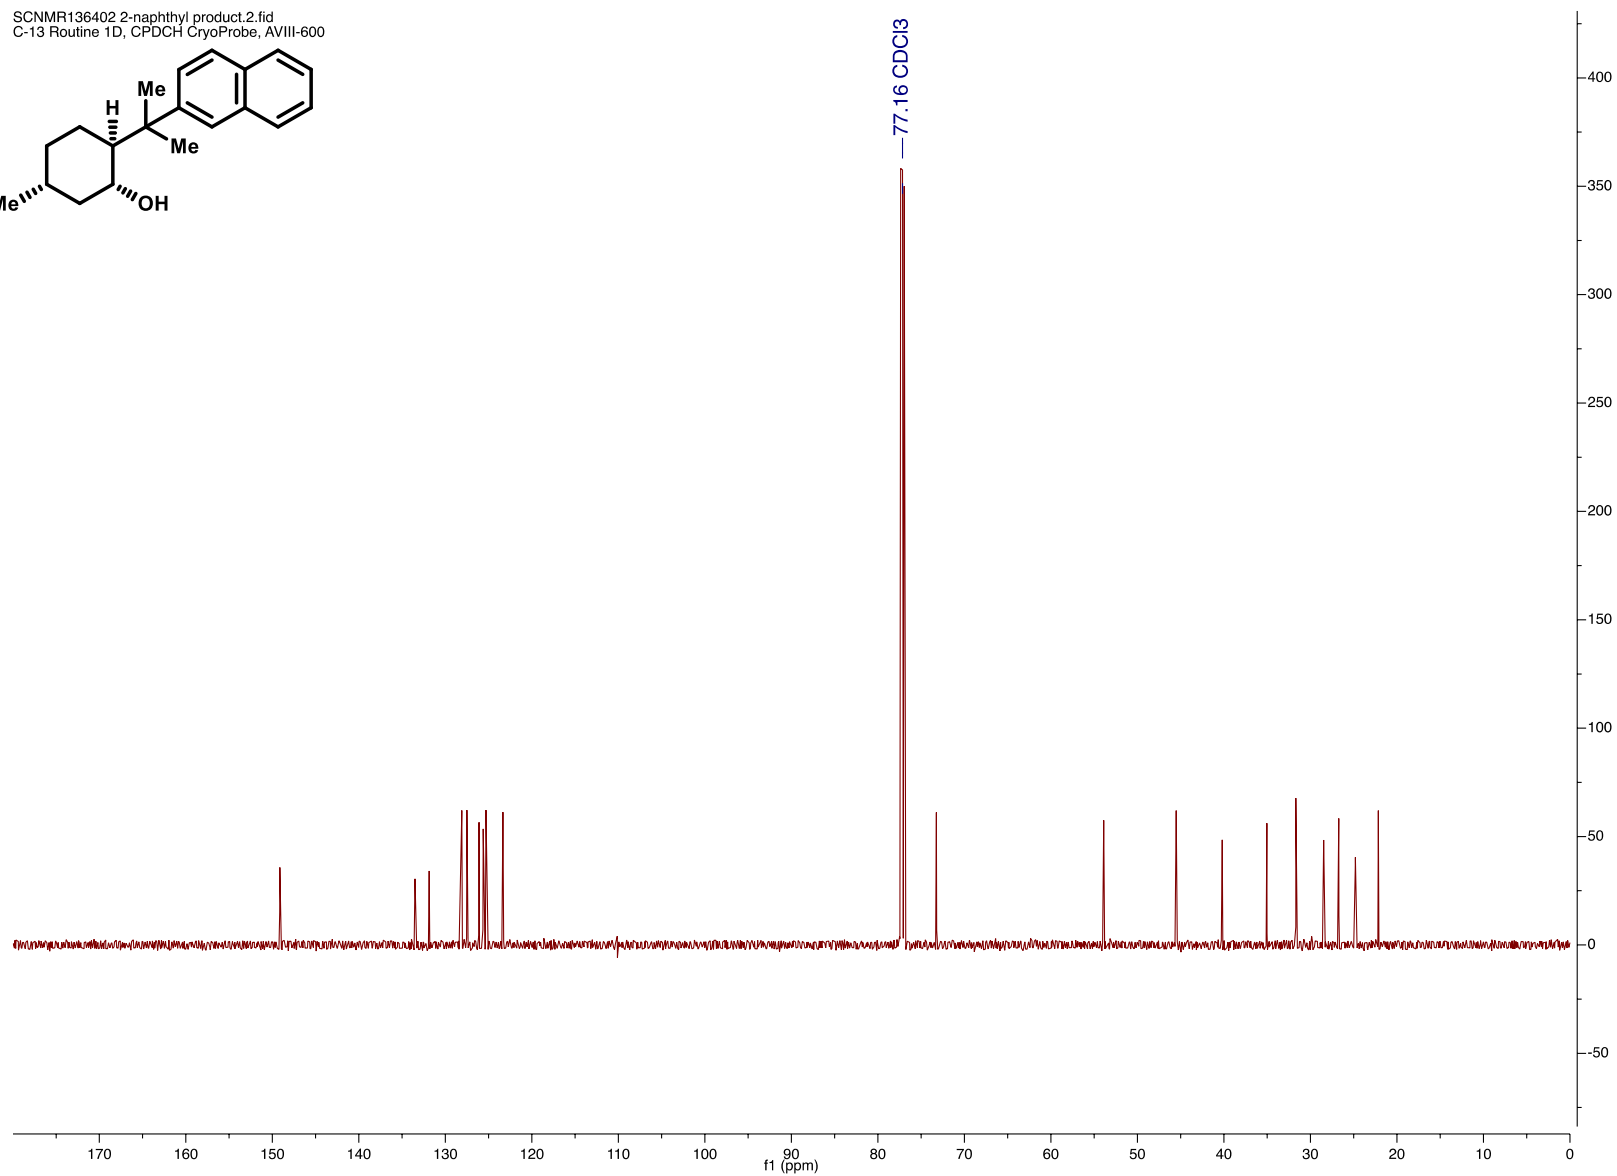

SCNMR136402 2-naphthyl product.2.fid  
C-13 Routine 1D, CPDCH CryoProbe, AVIII-600

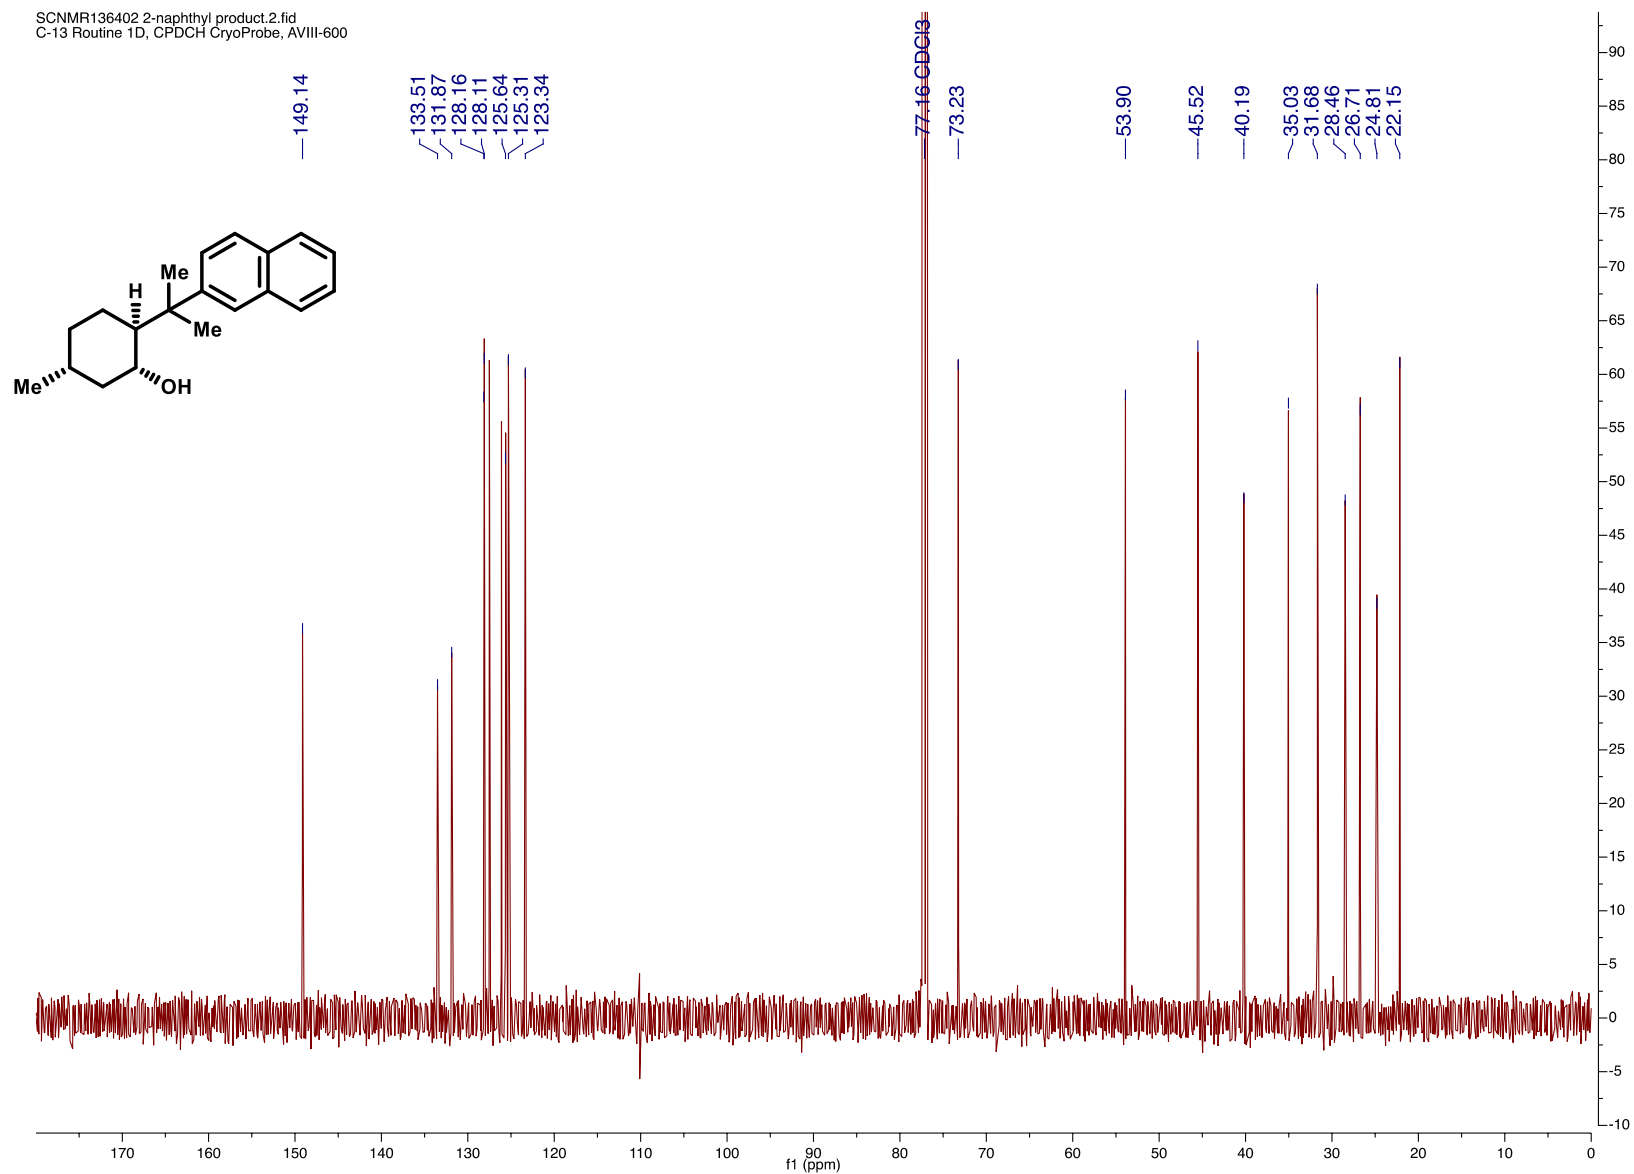

SI-10: <sup>1</sup>H-NMR

SCNMR153601.2.fid  
H-1 Routine, CP-DCH, AVIII HD-600

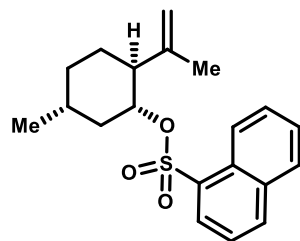

— 7.26 CDCl<sub>3</sub>

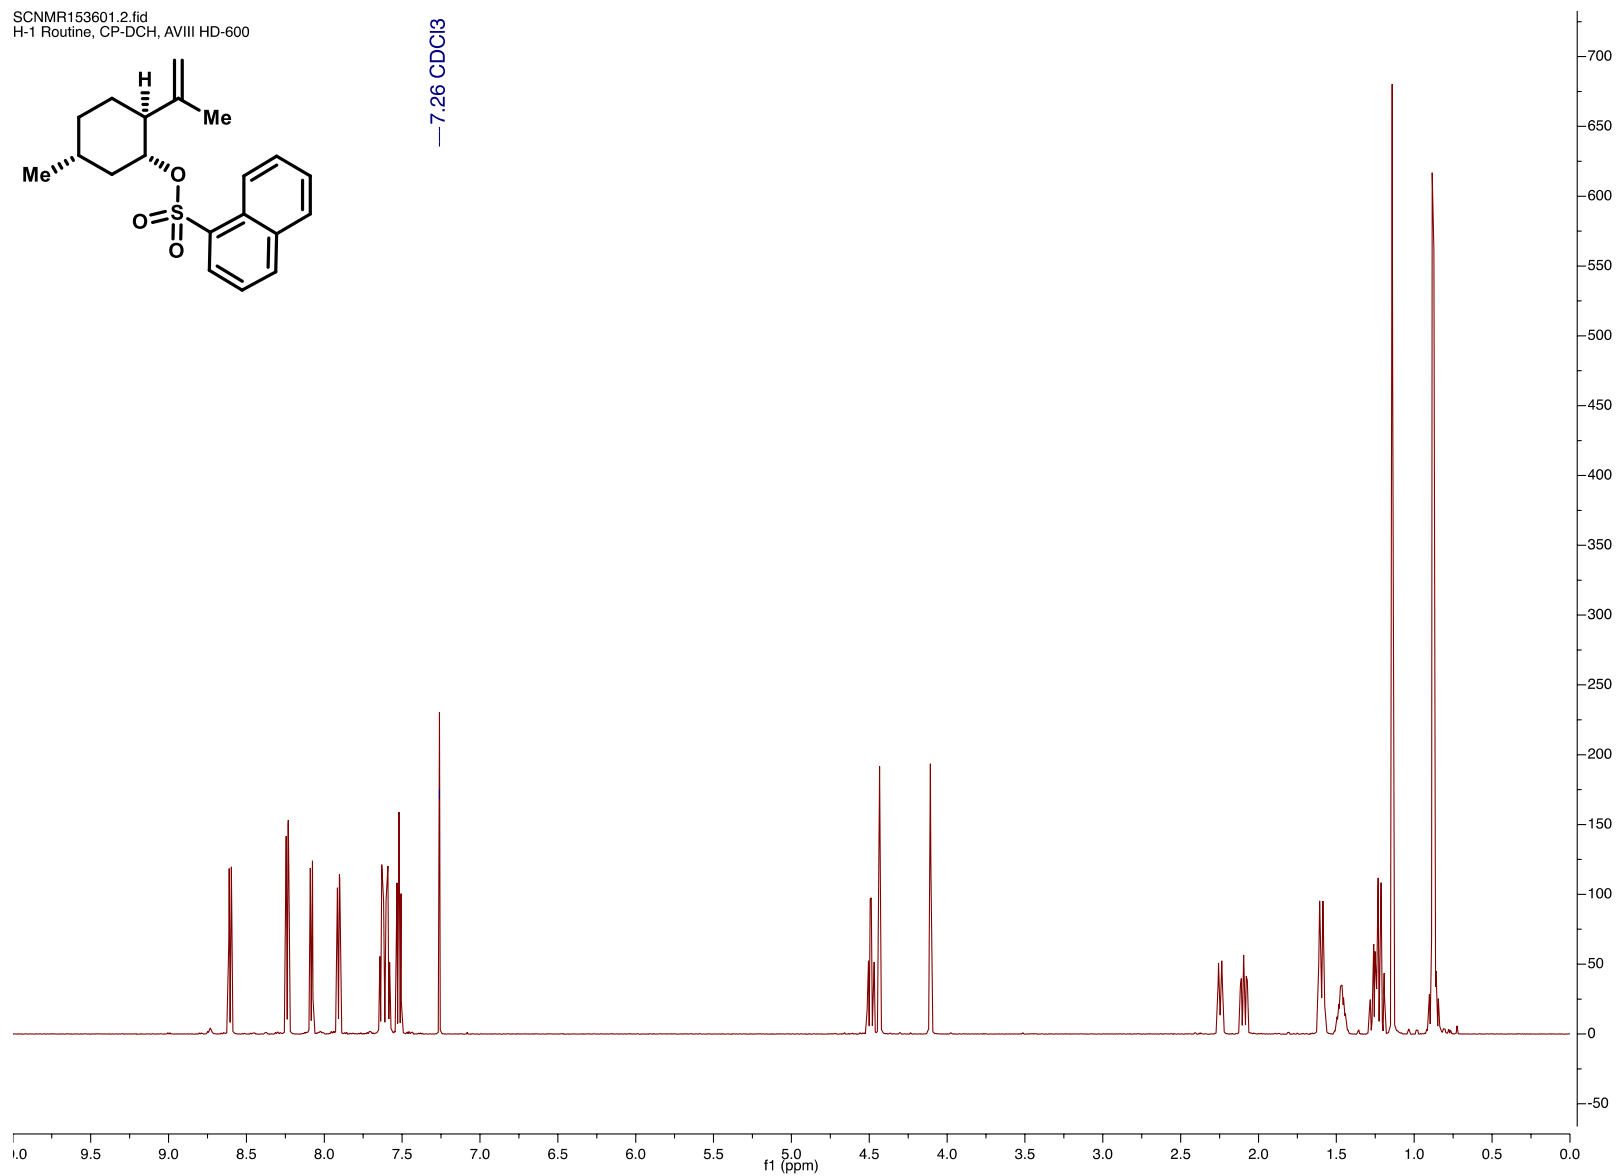

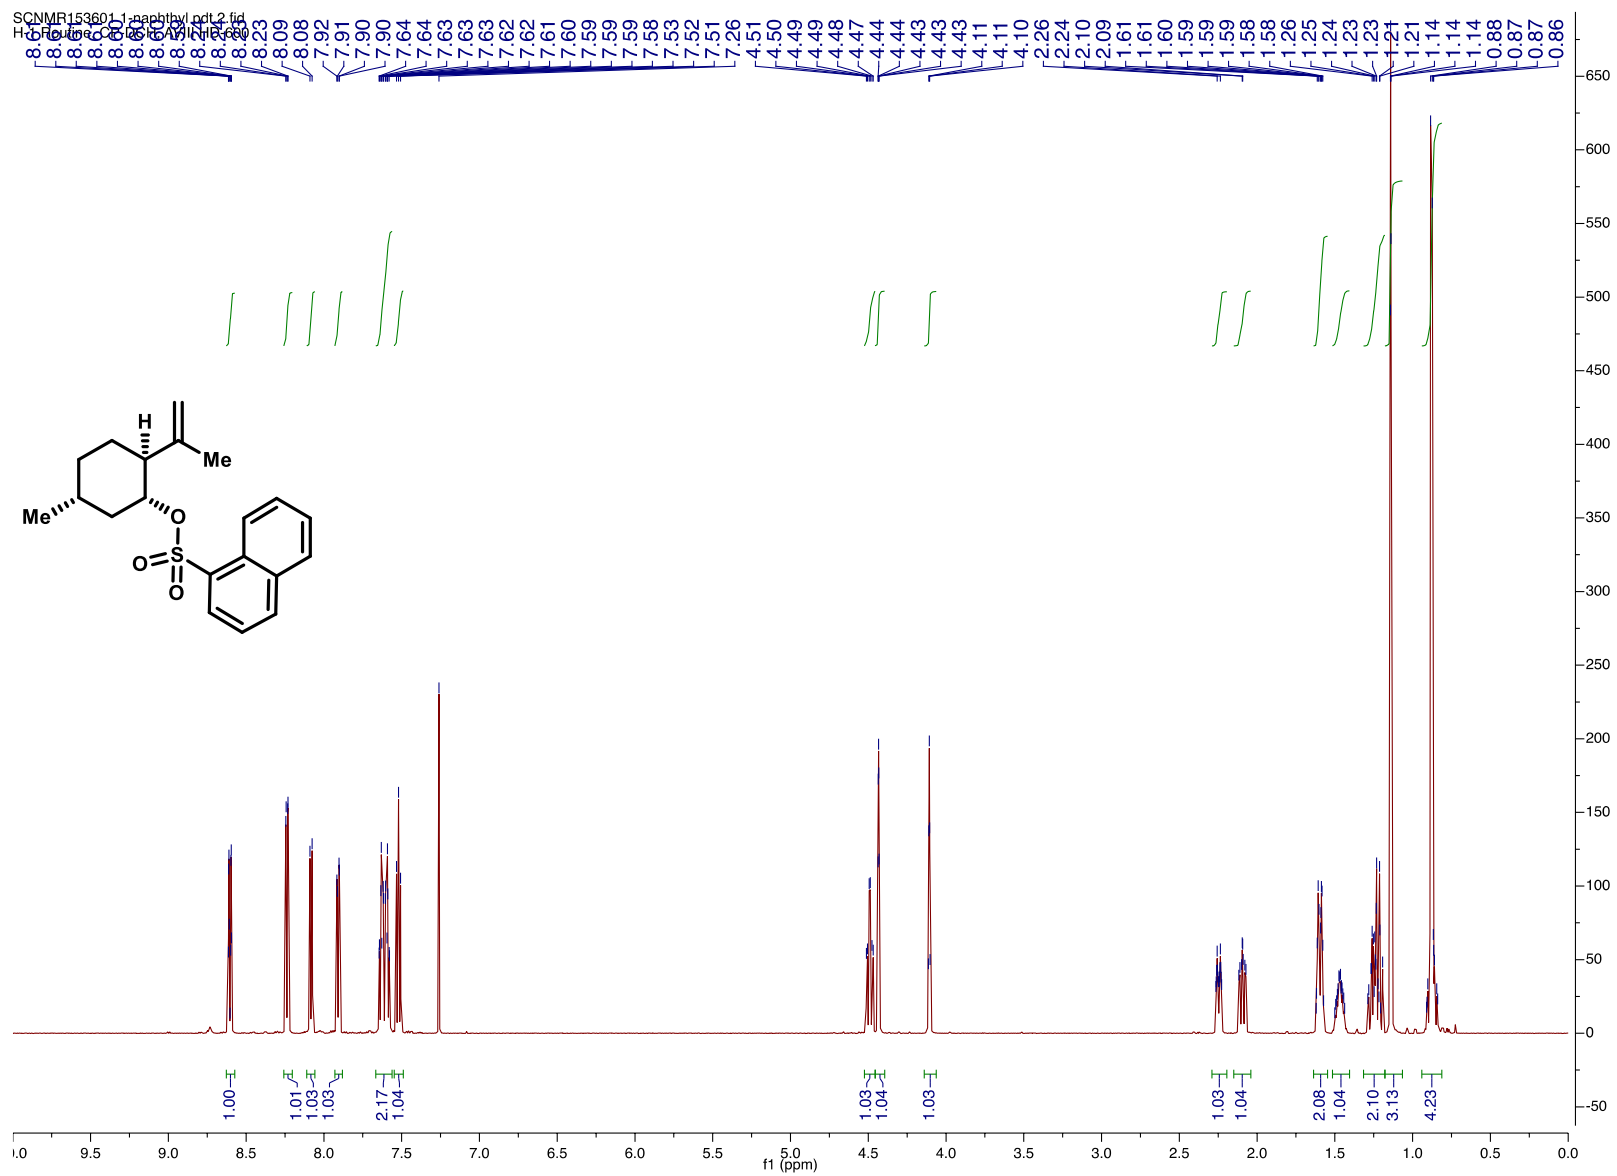



SI-10:  $^{13}\text{C}$ -NMR

SCNMR153601.3.fid  
C-13 Routine 1D, CPDCH CryoProbe, AVIII-600

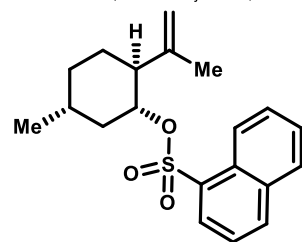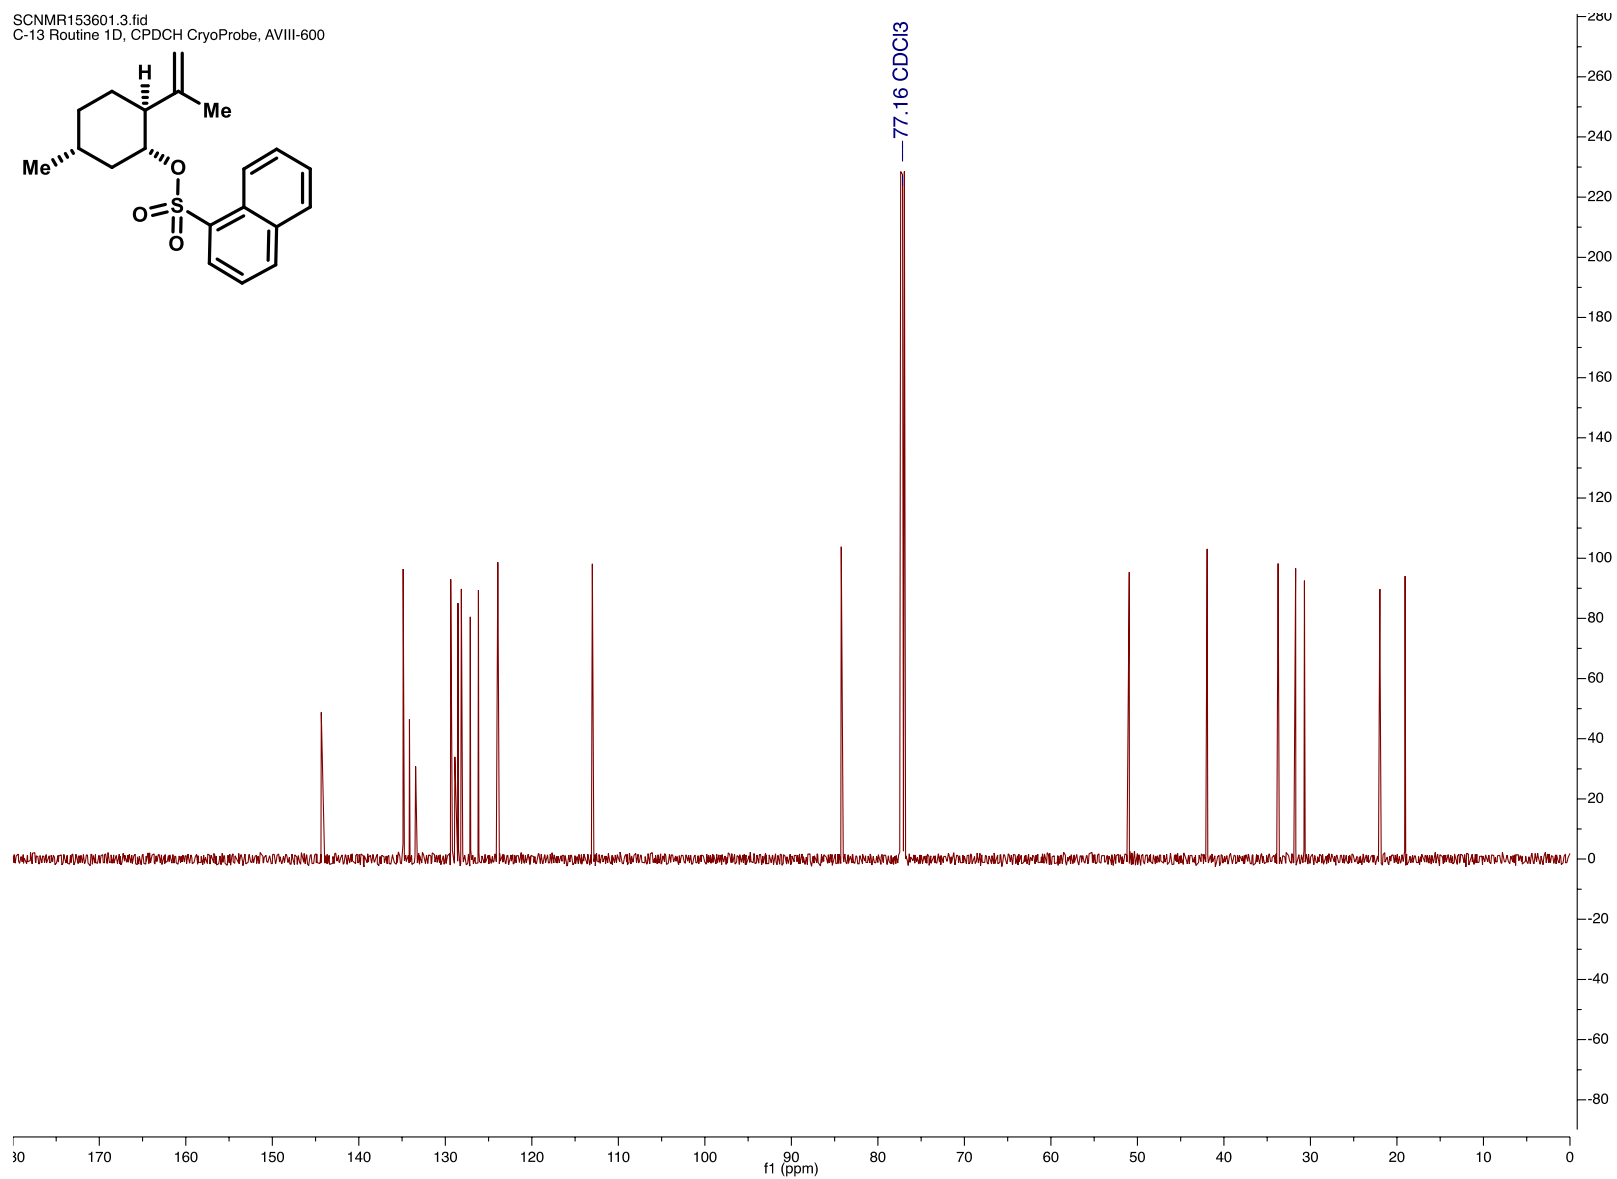

SCNMR153601 1-naphthyl pdt.3.fid  
C-13 Routine 1D, CPDCH CryoProbe, AVIII-600

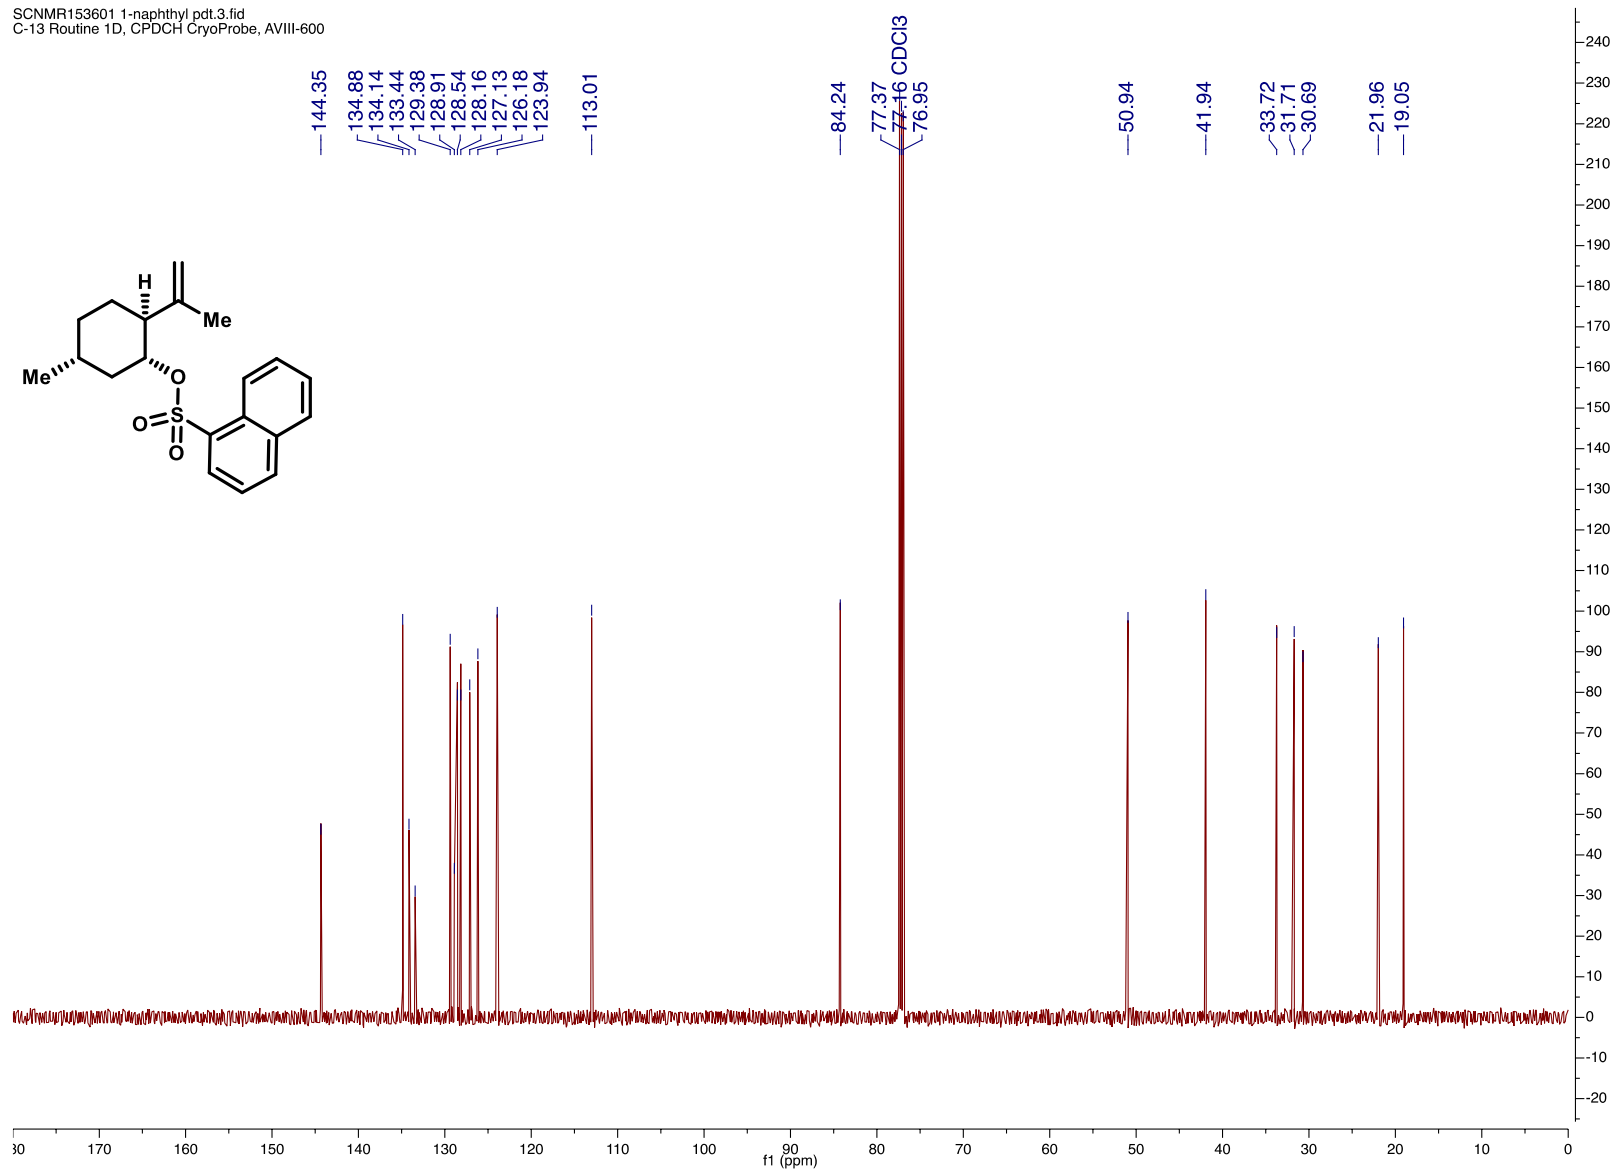

8:  $^1\text{H}$ -NMR, T=298K

SCNMR153906.4.fid

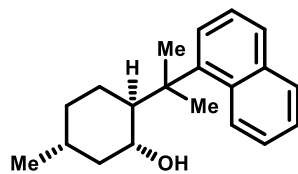

— 7.26 CDCl<sub>3</sub>

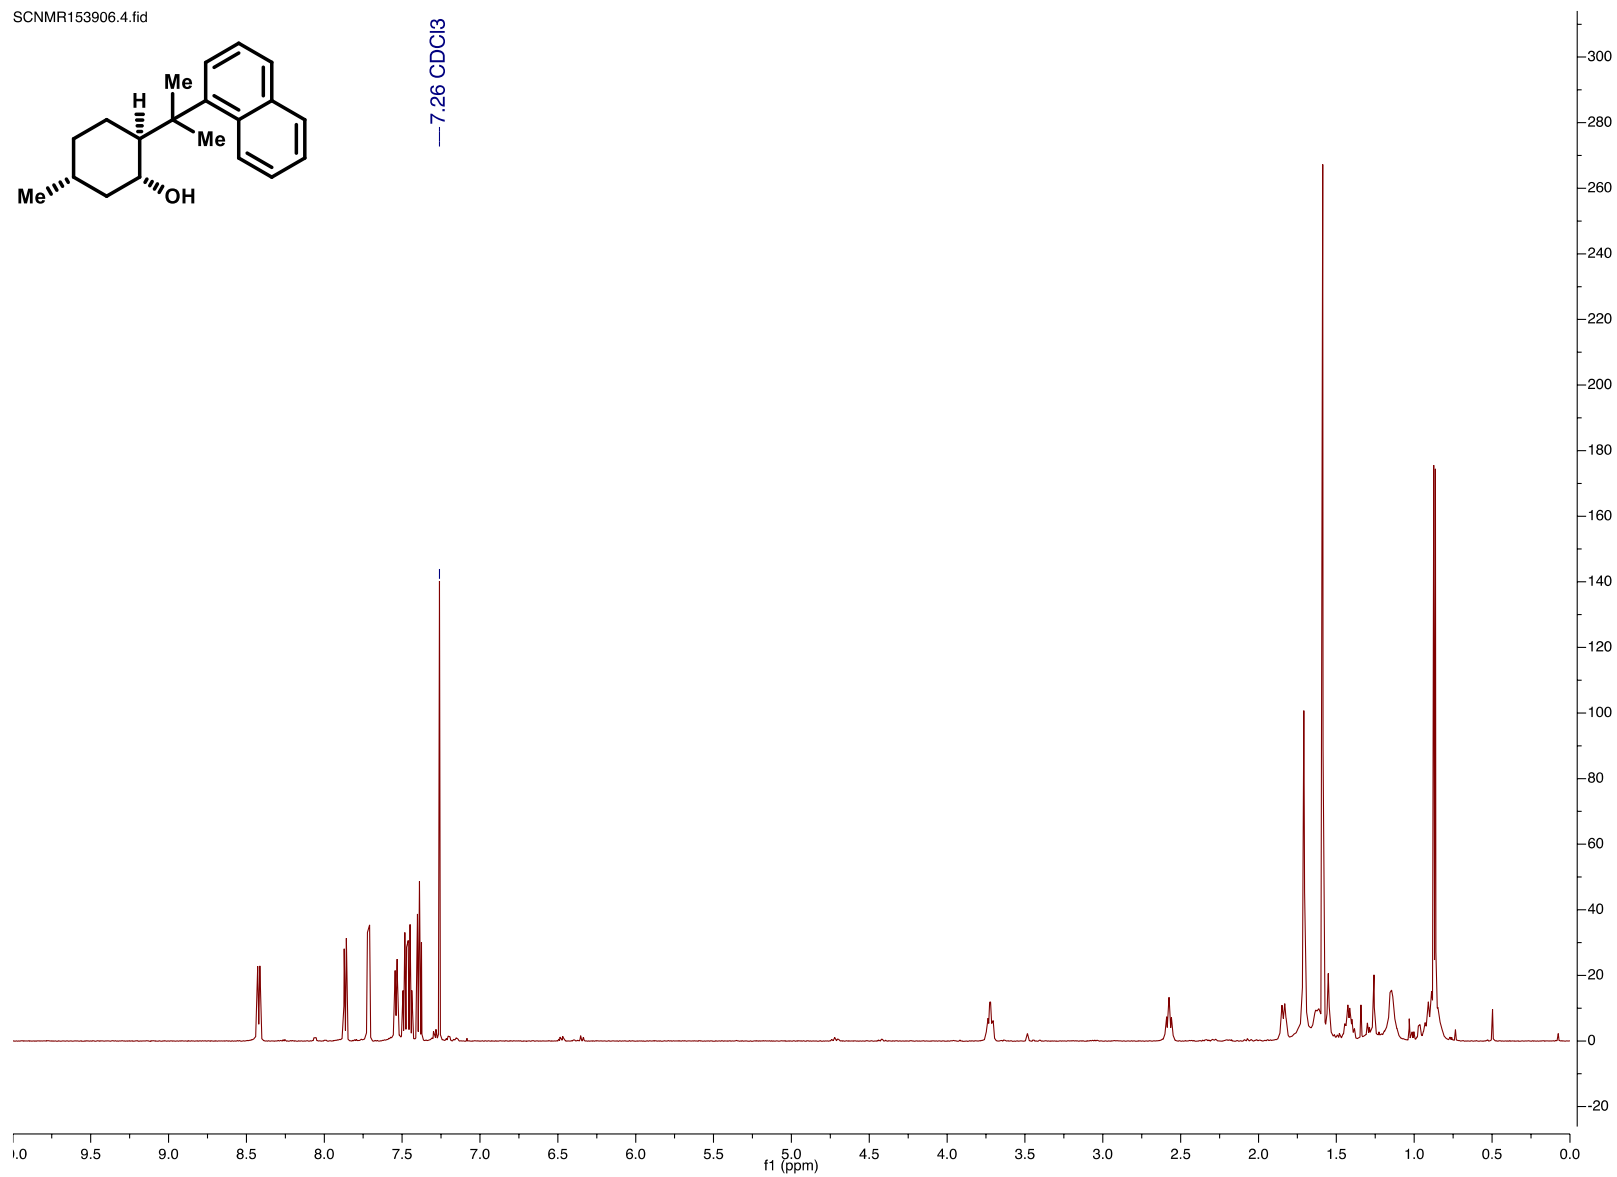

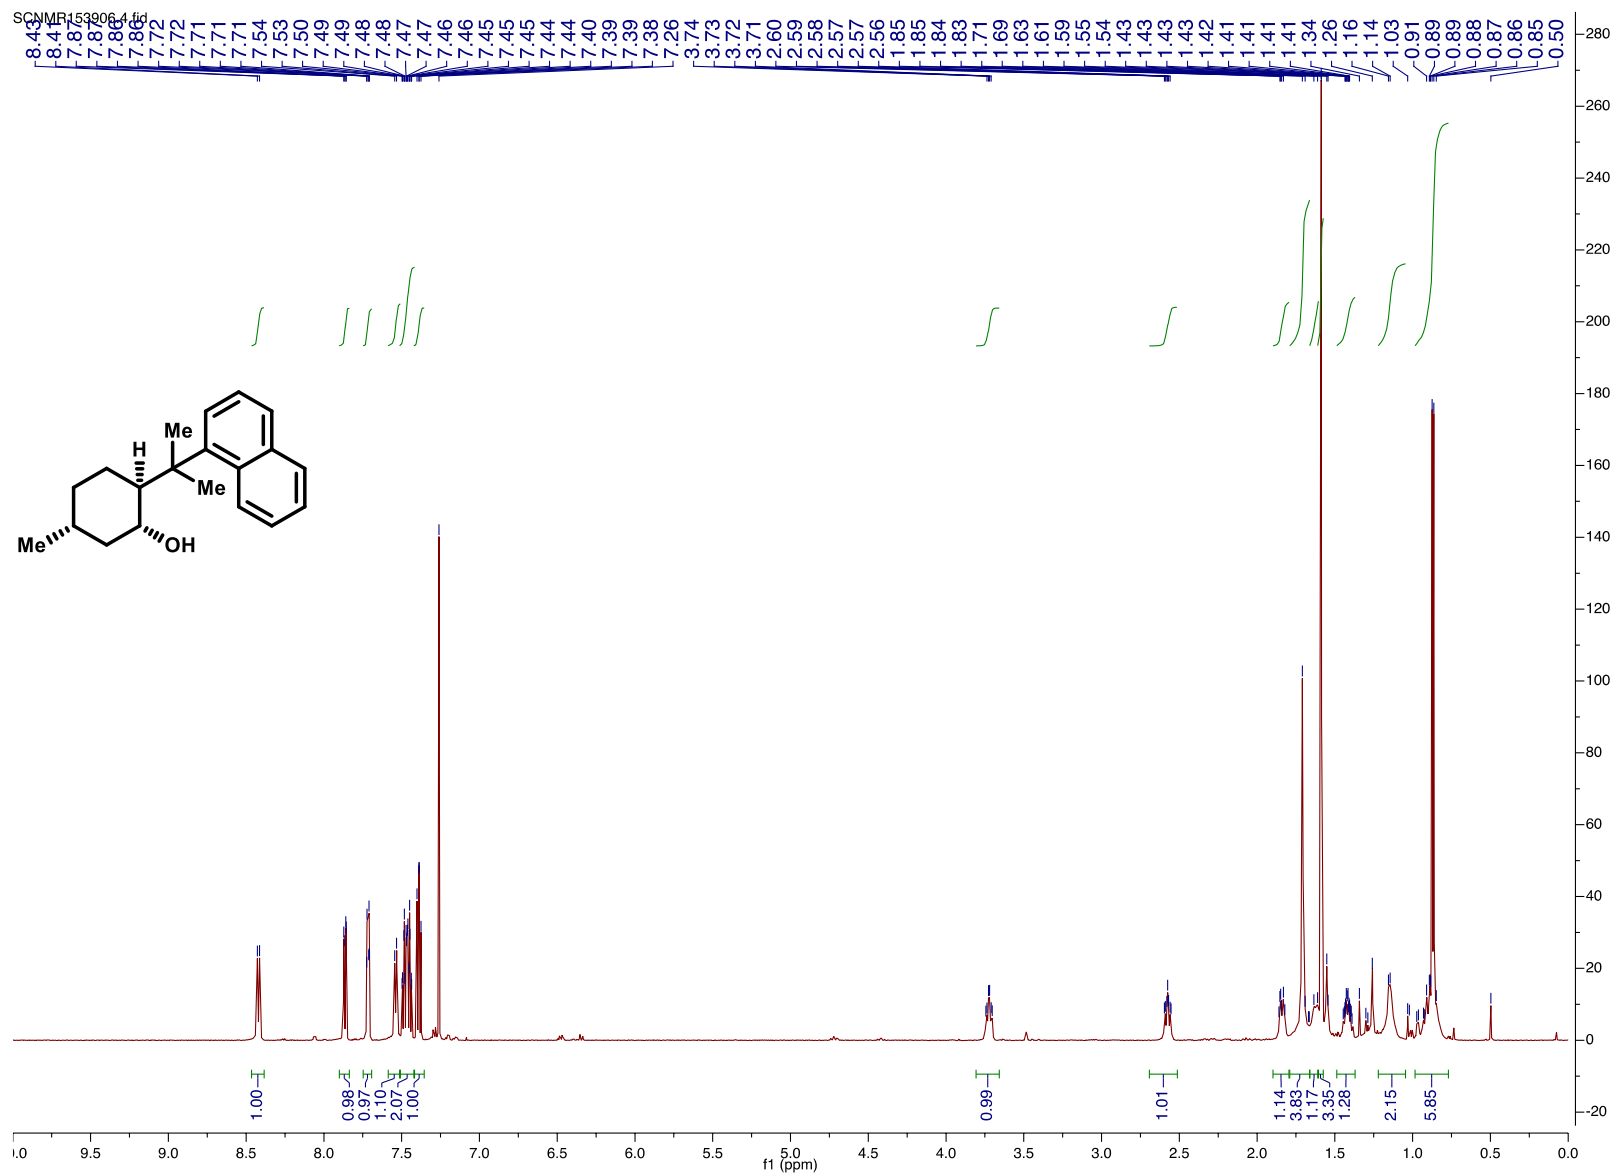

8:  $^{13}\text{C}$ -NMR T=298K

SCNMR153906.3.fid  
C-13 Routine 1D, CPDCH CryoProbe, AVIII-600

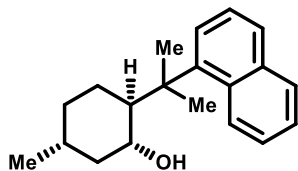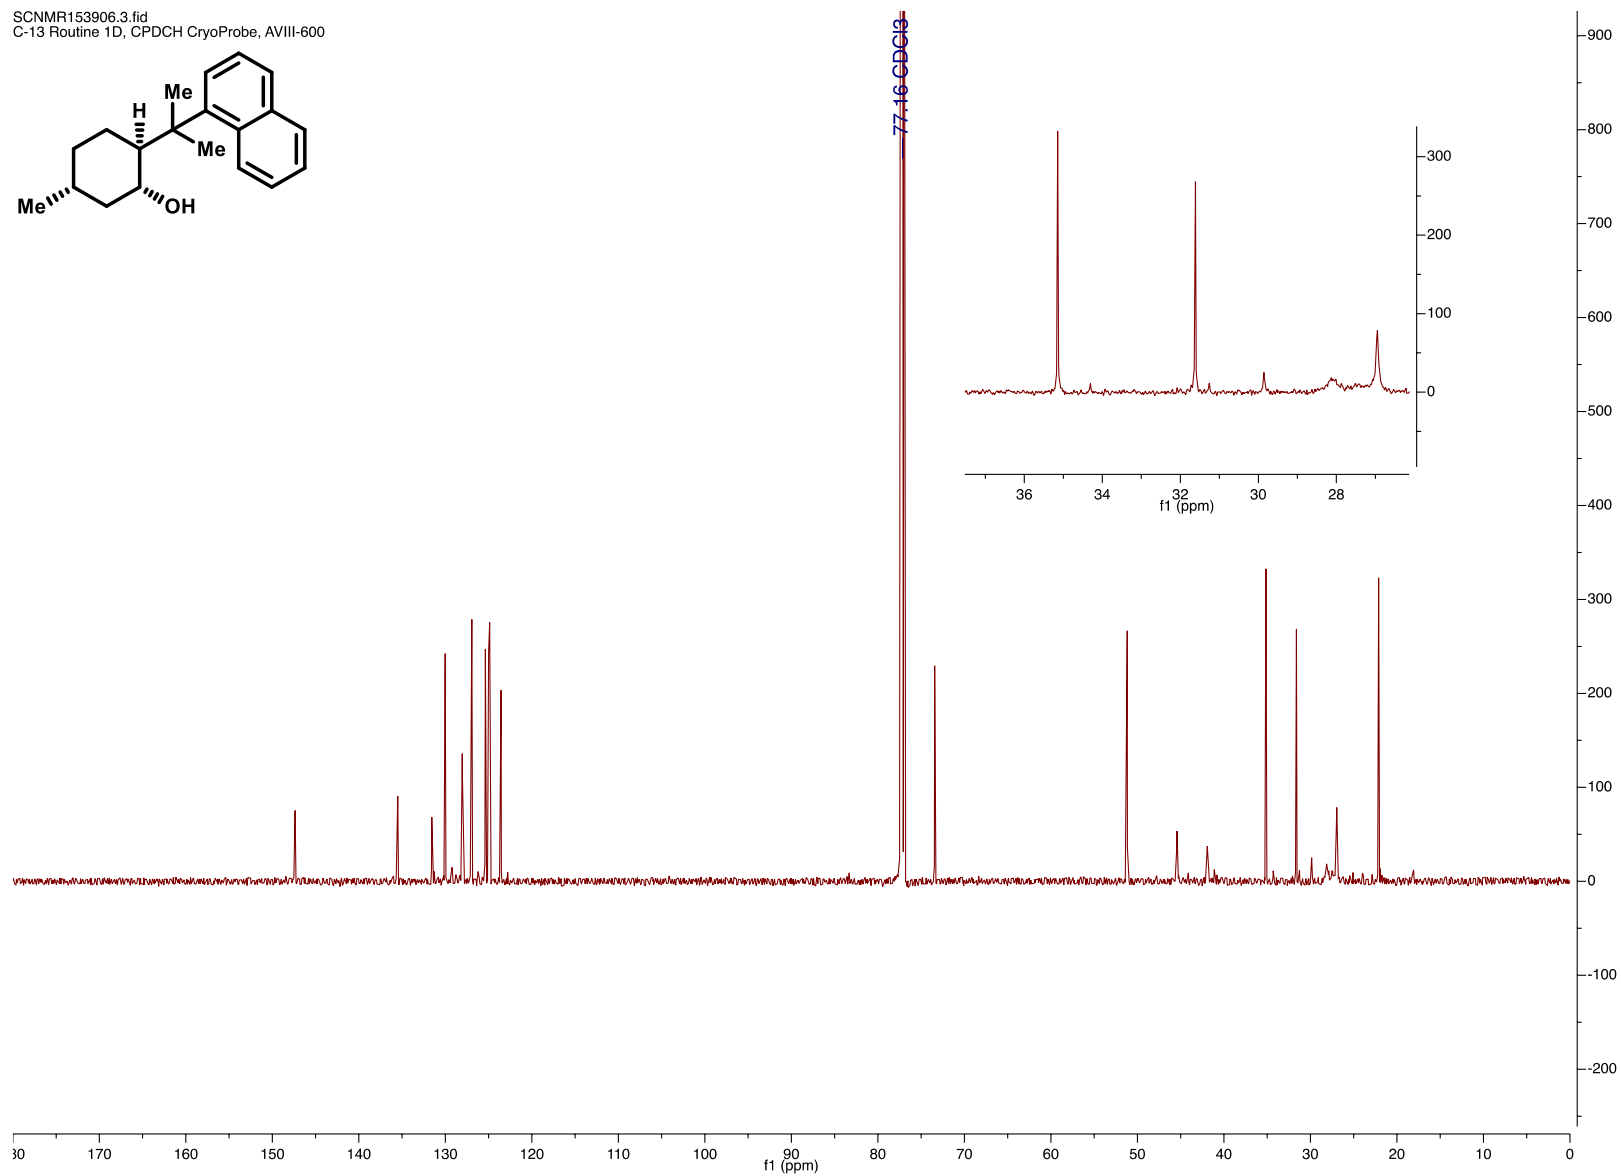

SCNMR153906.3.fid  
C-13 Routine 1D, CPDCH CryoProbe, AVIII-600

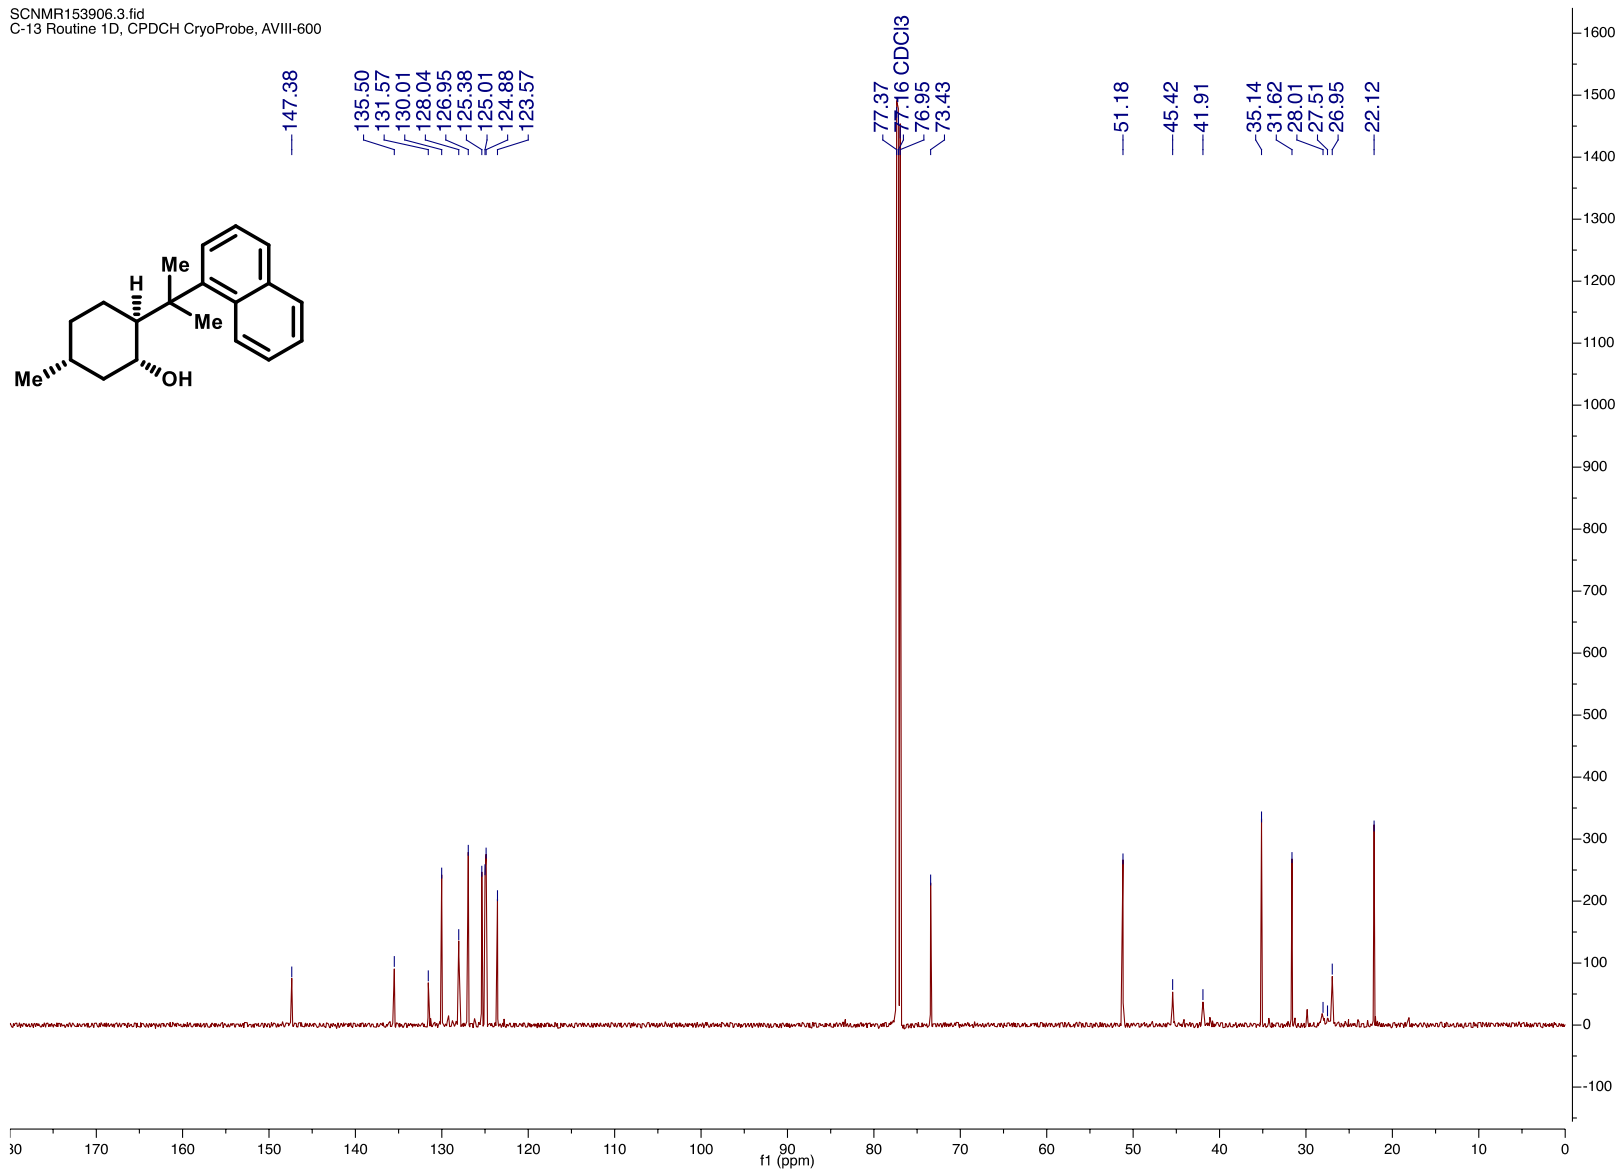

8:  $^1\text{H}$ -NMR T=323K

SCNMR153906.12.fid  
H-1 Routine, CP-DCH, AVIII HD-600

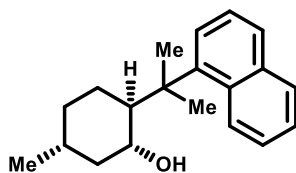

— 7.26 CDCl<sub>3</sub>

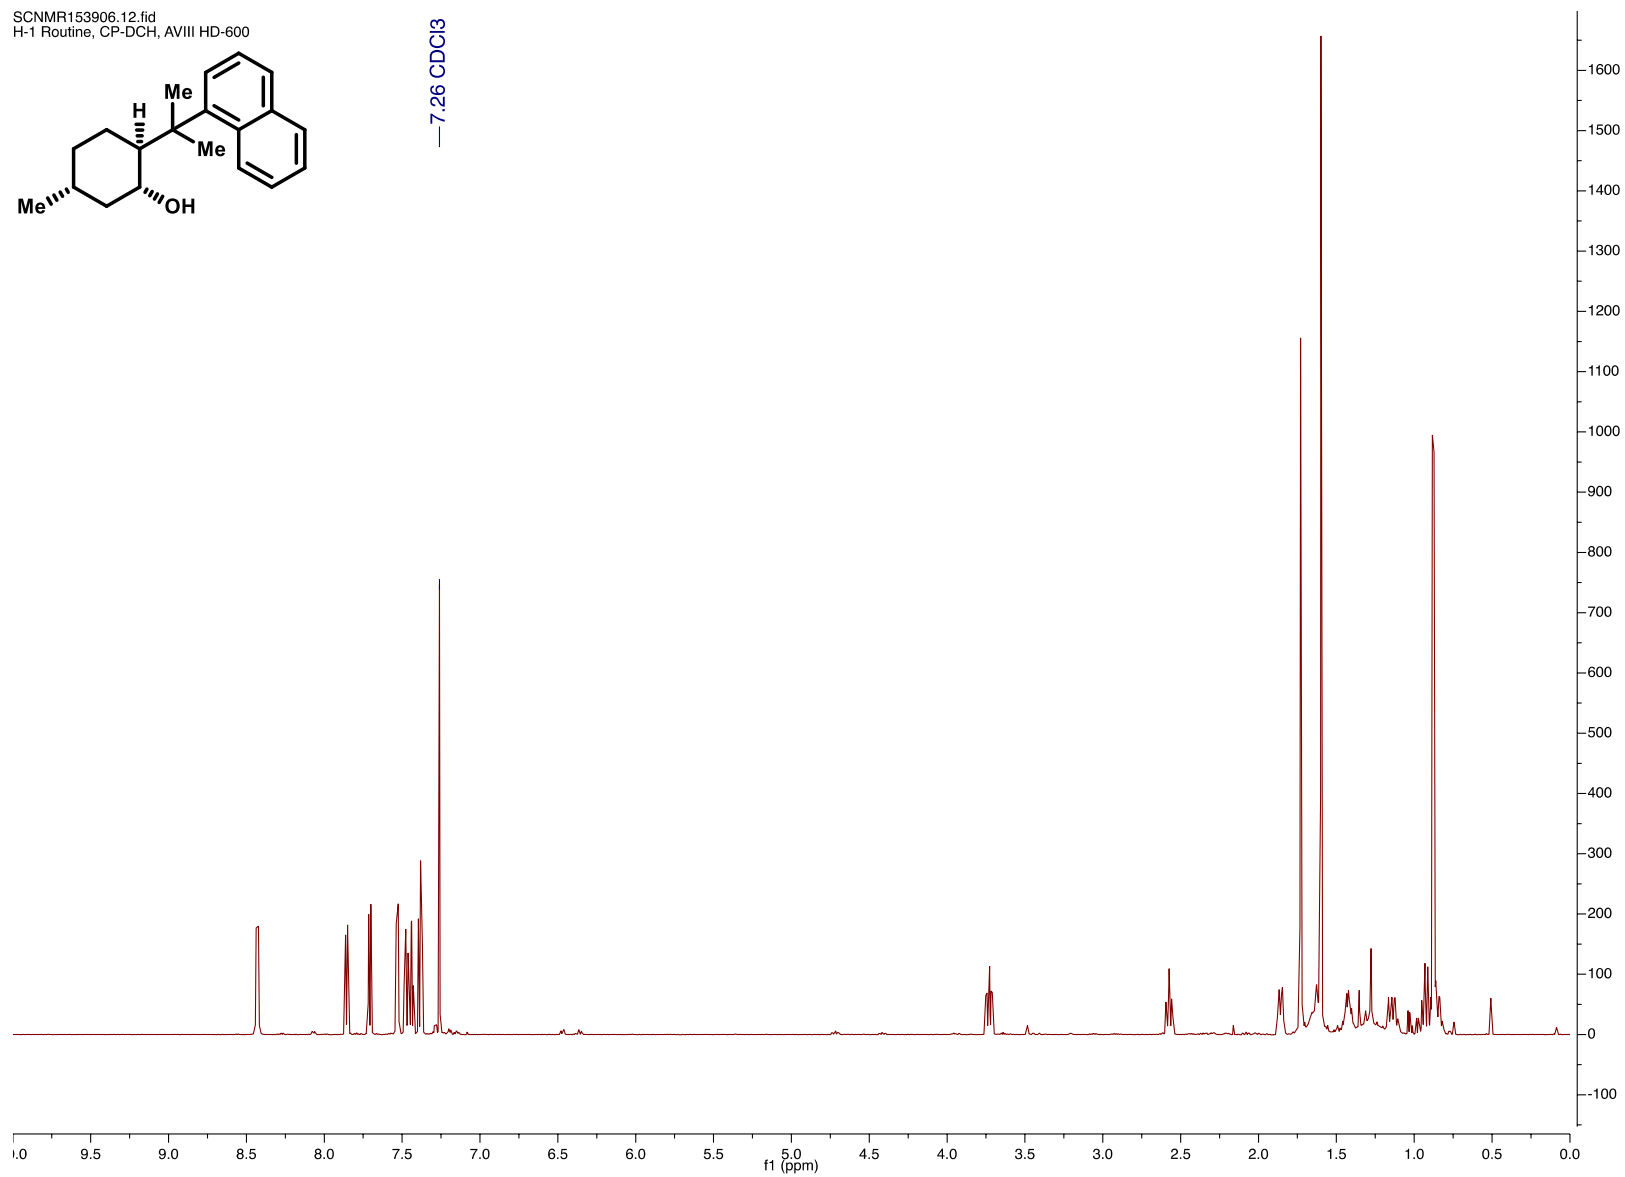

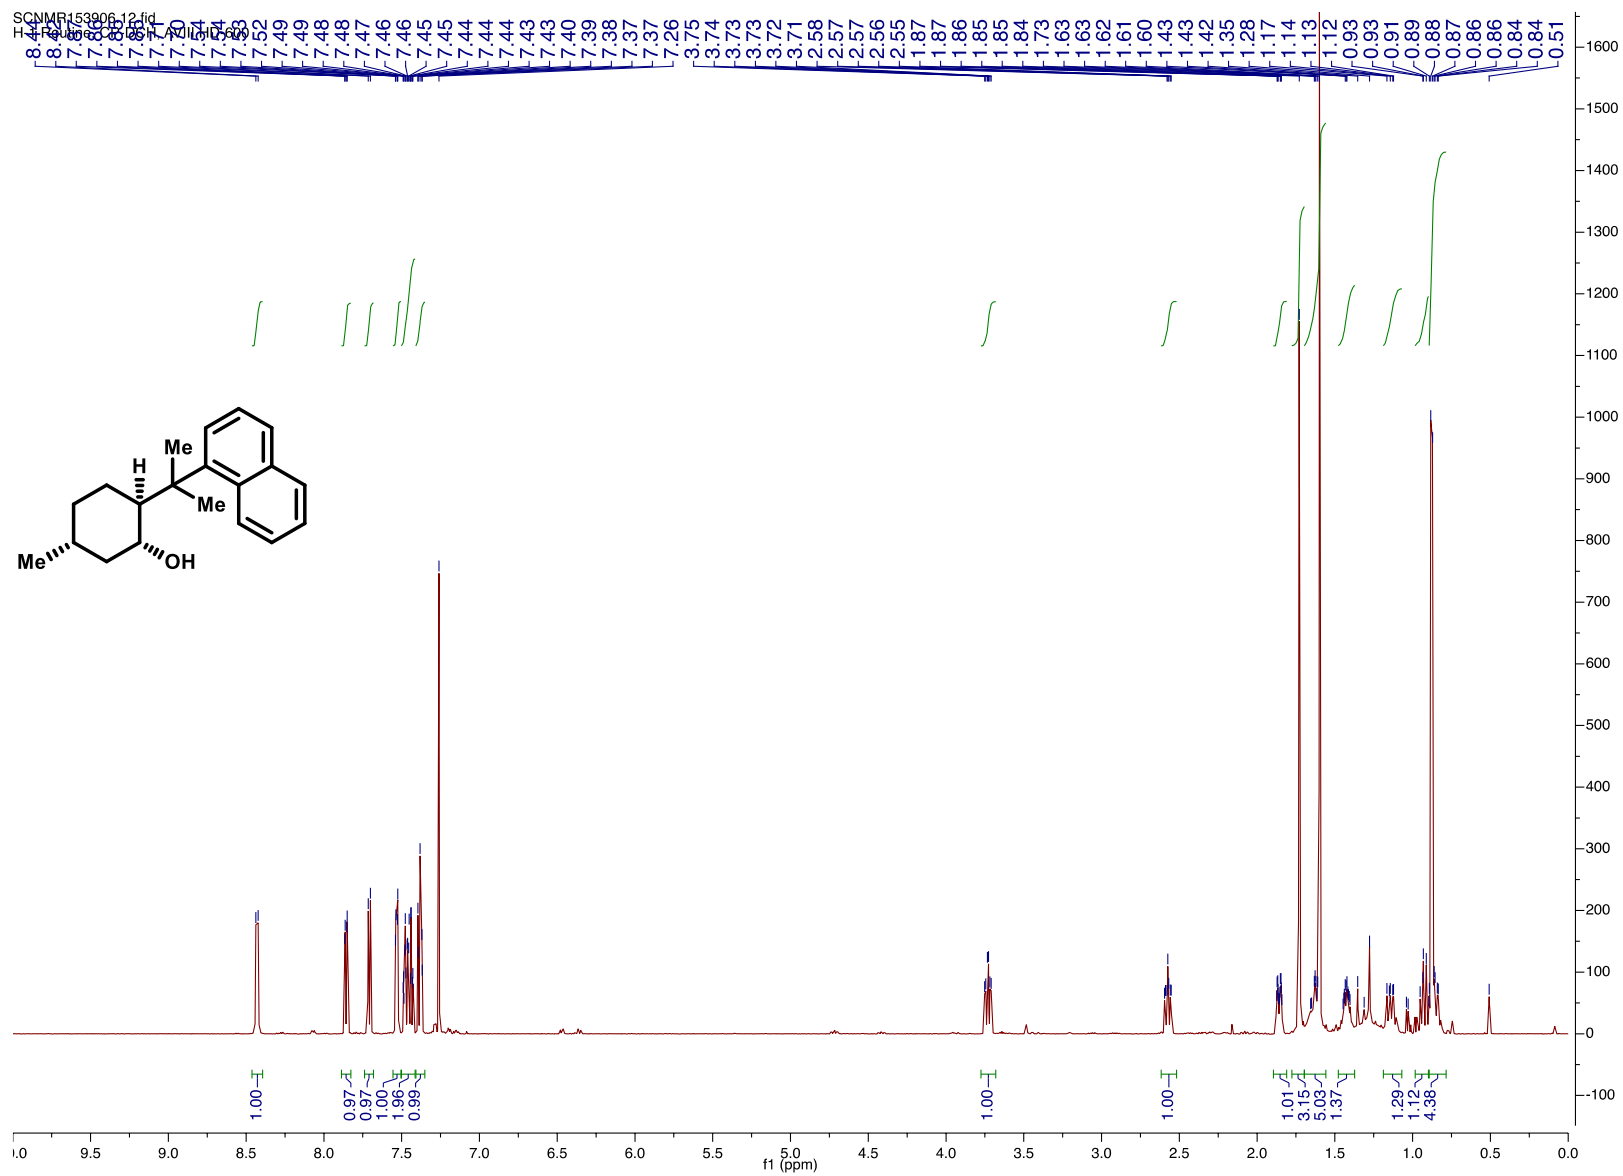



8:  $^{13}\text{C}$ -NMR T=323K

SCNMR153906.11.fid  
C-13 Routine 1D, CPDCH CryoProbe, AVIII-600

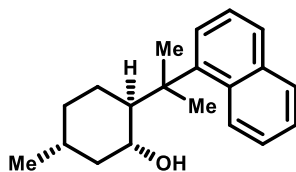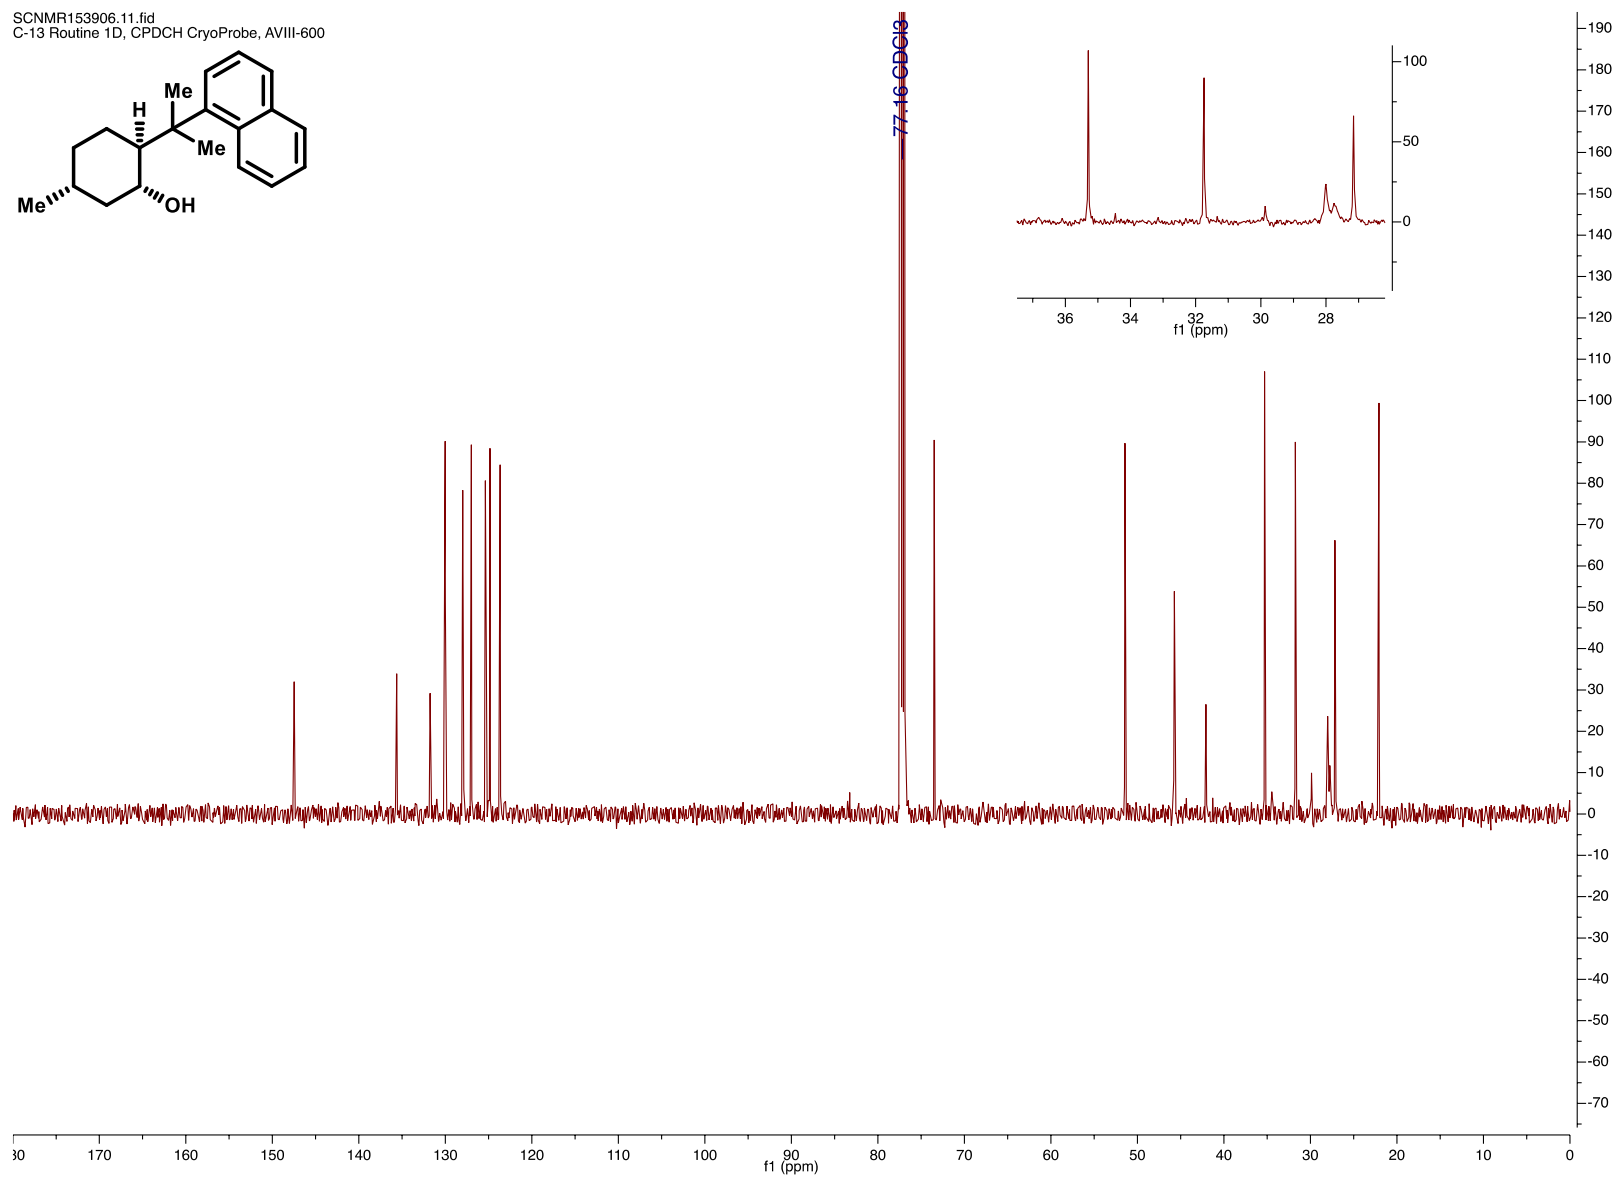

SCNMR153906.11.fid  
C-13 Routine 1D, CPDCH CryoProbe, AVIII-600

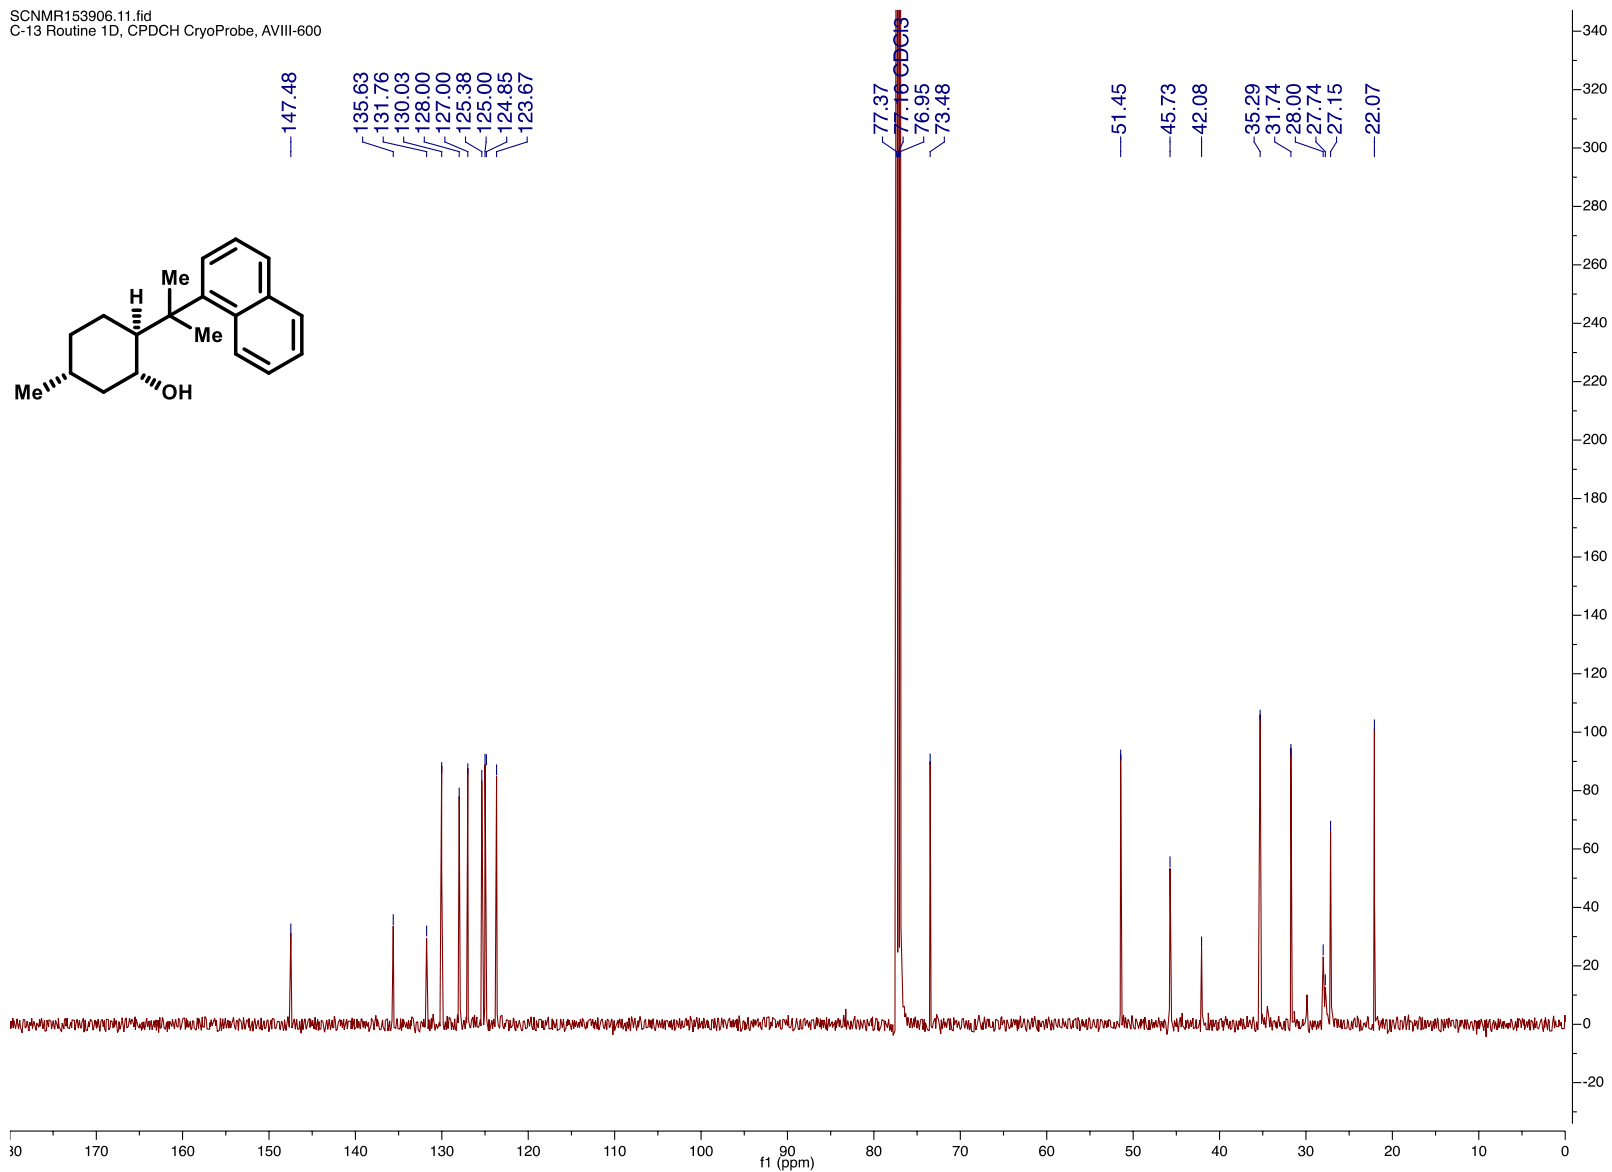

SI-11:  $^1\text{H}$ -NMR

sgz1-259-col 2.1.fid

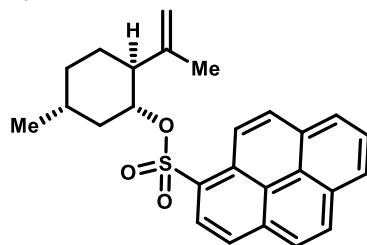

— 7.26 CDCl<sub>3</sub>

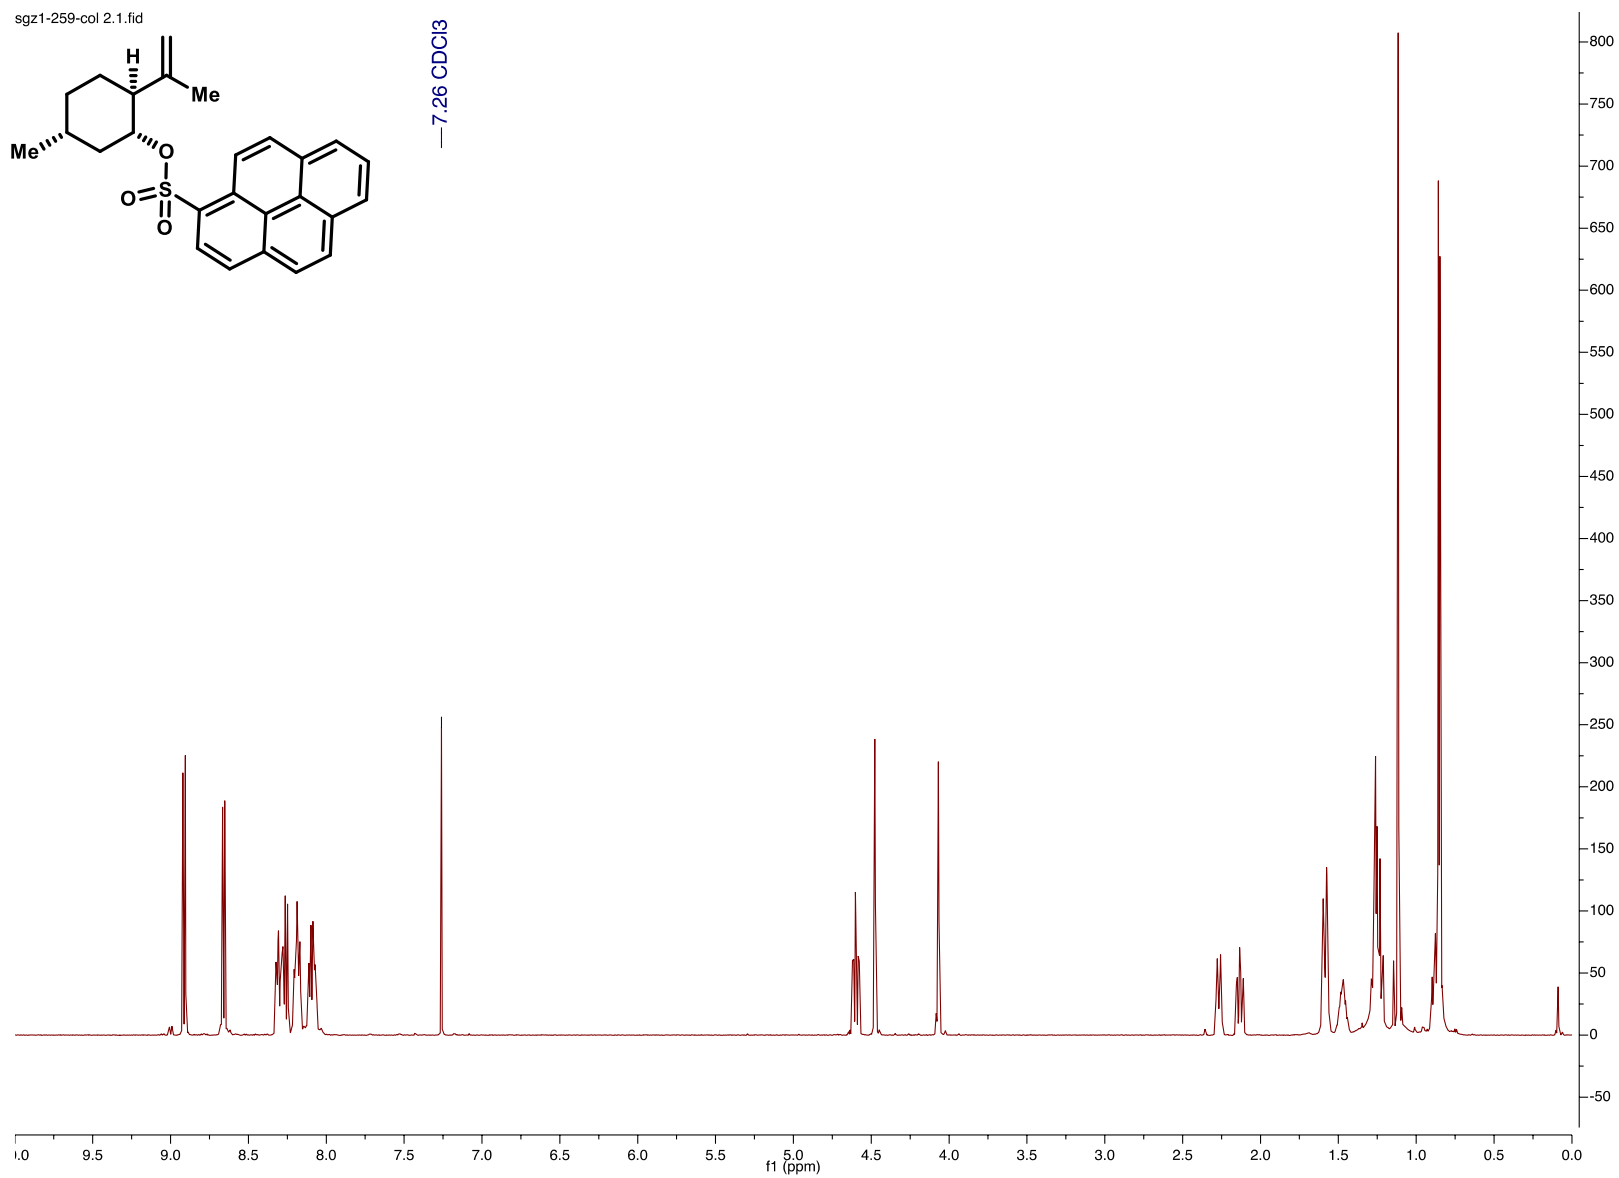

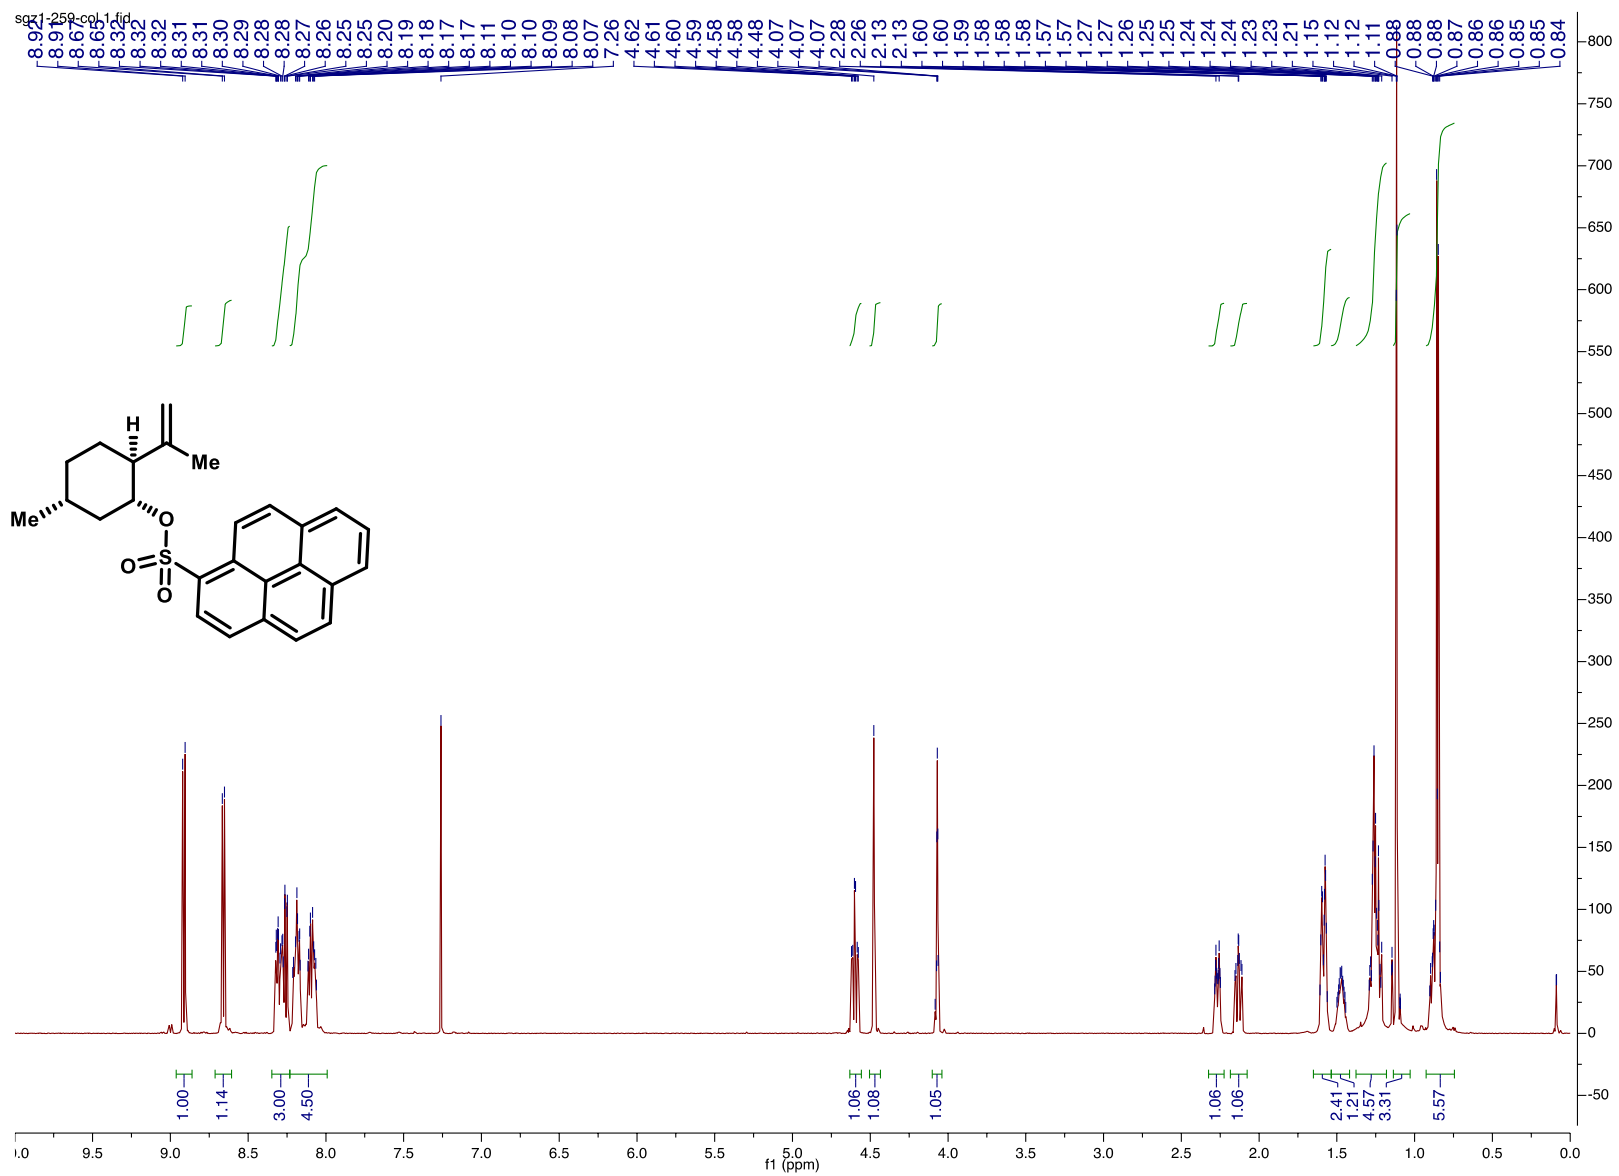

SI-11:  $^{13}\text{C}$ -NMR

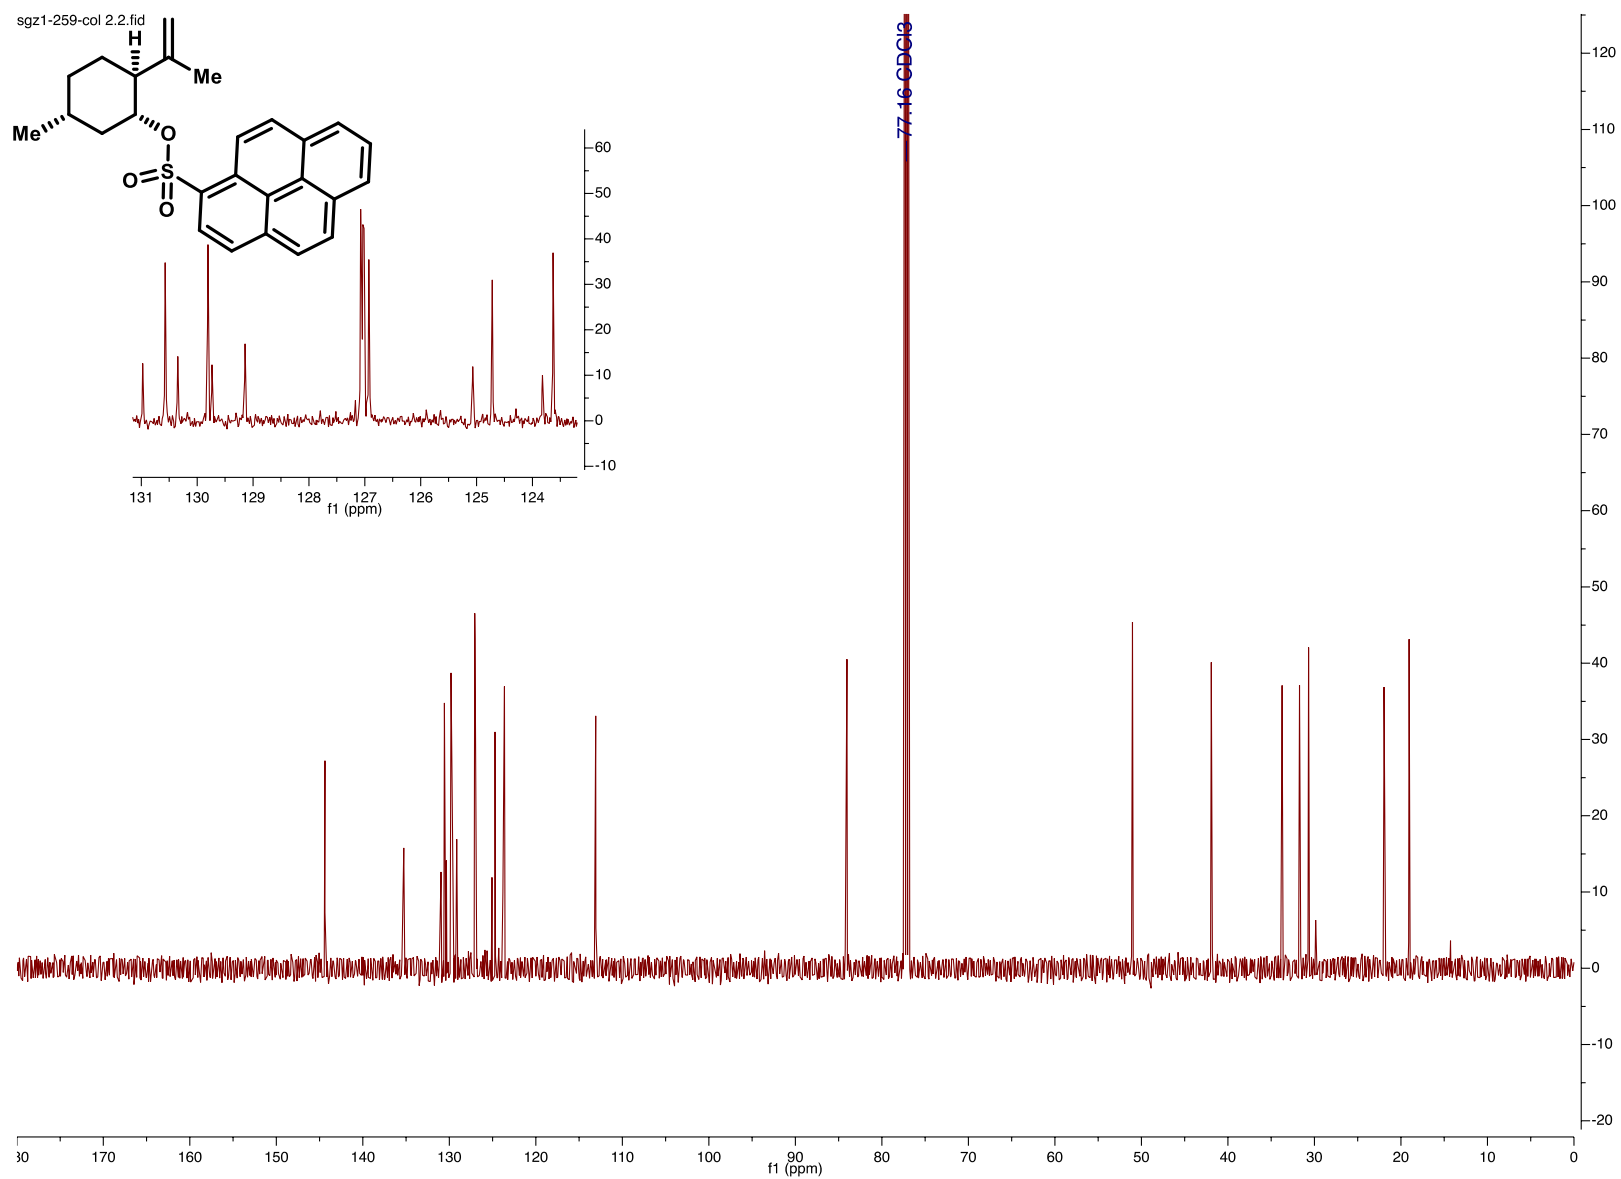

sgz1-259-col.2.fid

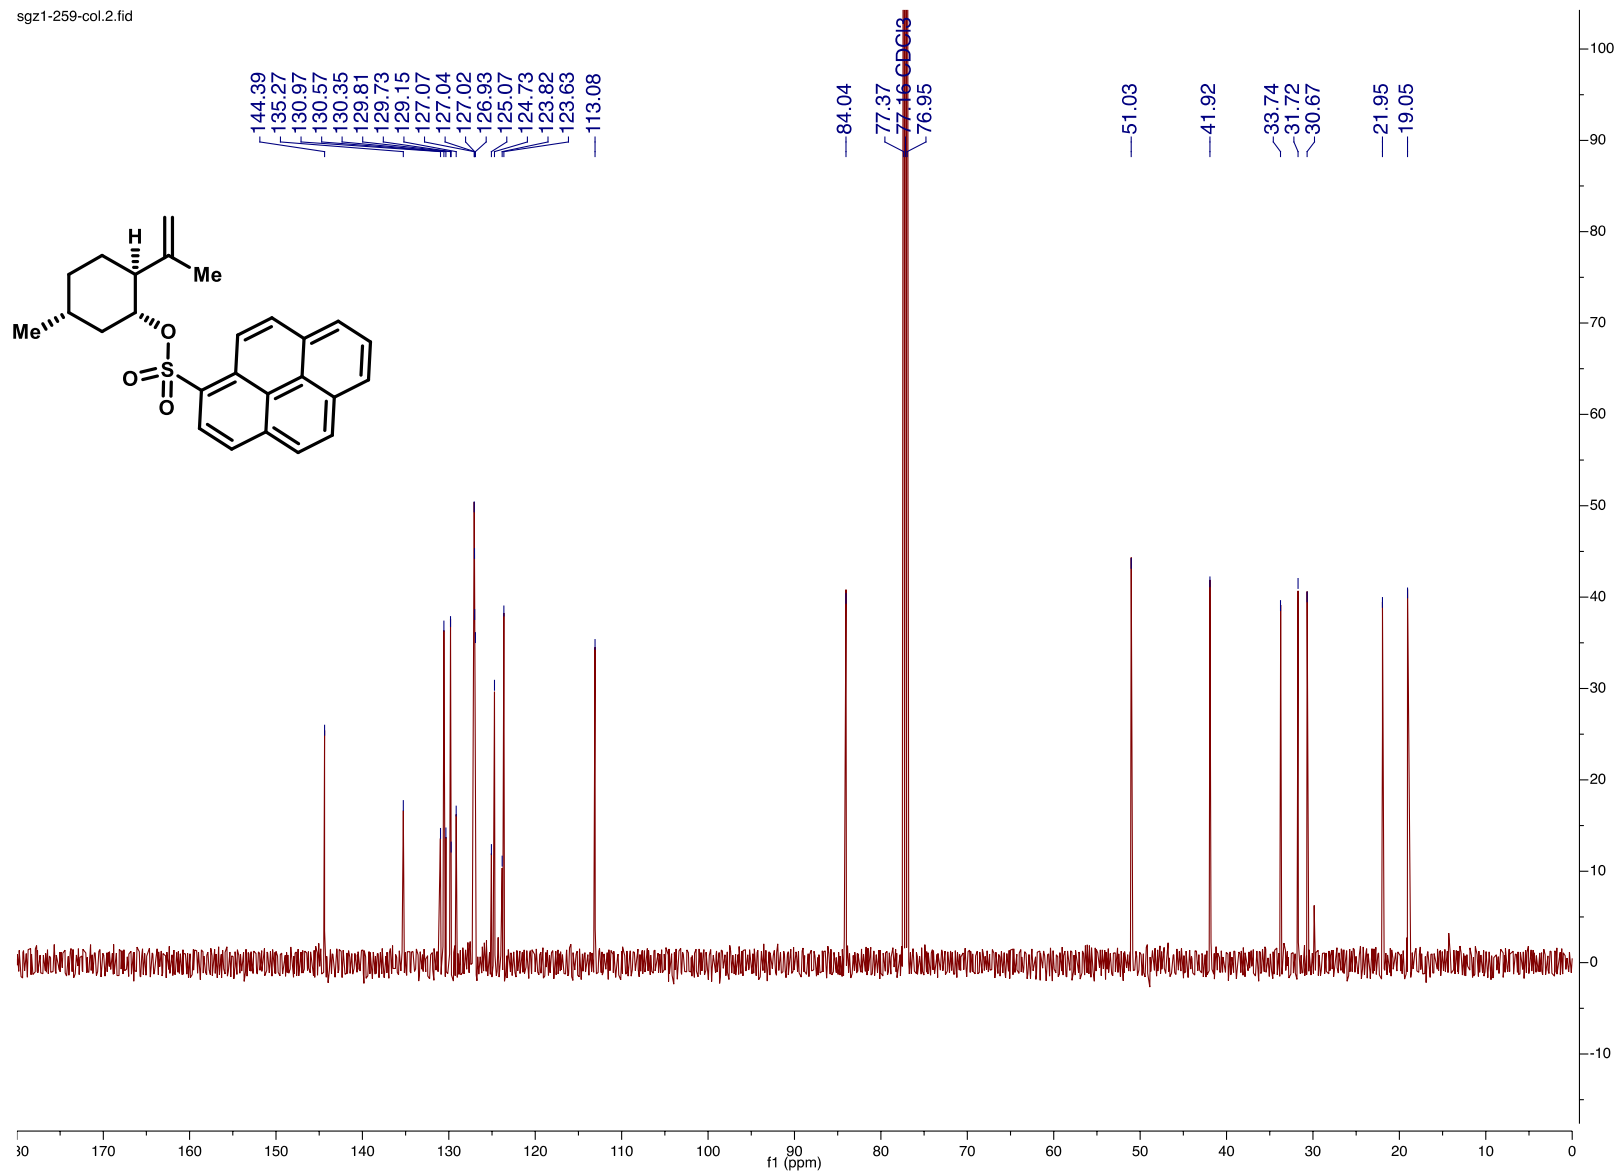

## 9: $^1\text{H}$ -NMR

SCNMR156602.1.fid  
H-1 Routine, DRX-500, BBO Probe

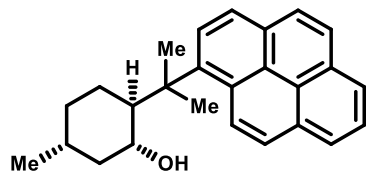

— 7.26 CDCl<sub>3</sub>

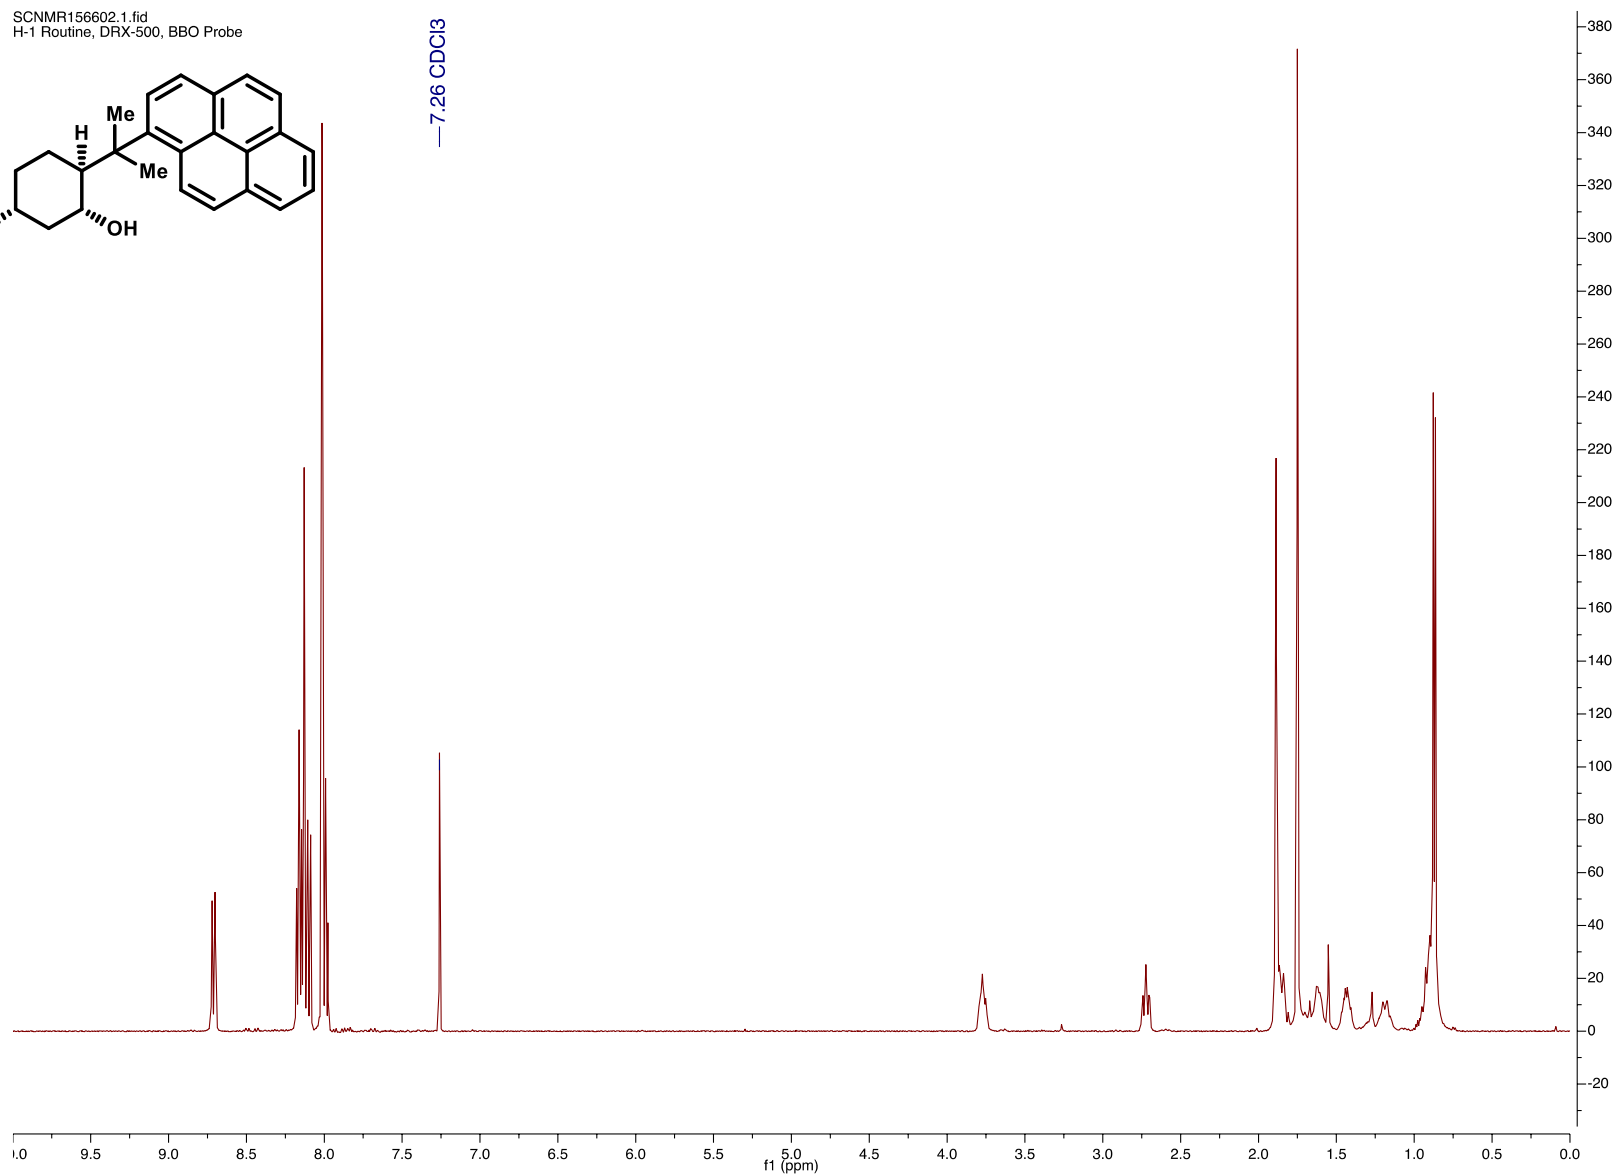

SCNMR156602 pyrene pdt 1.fid  
H-1 Routine, DRX-500, BBG

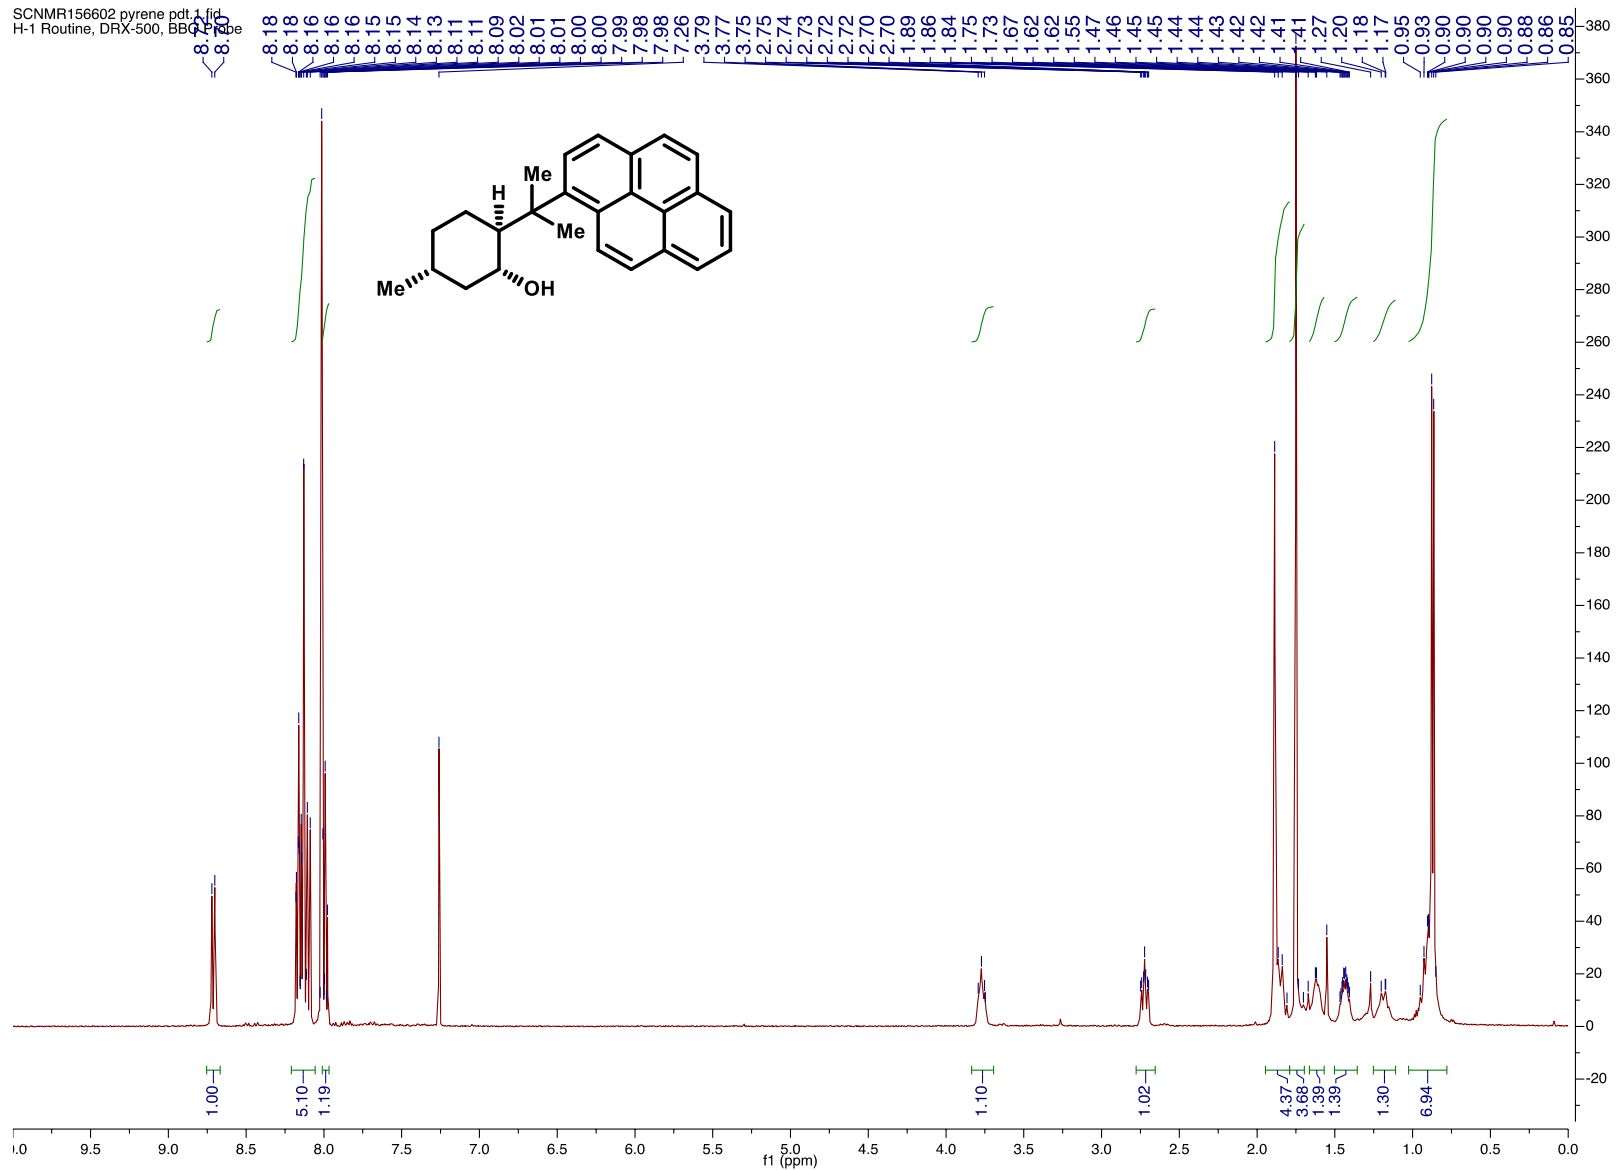



## 9: $^{13}\text{C}$ -NMR

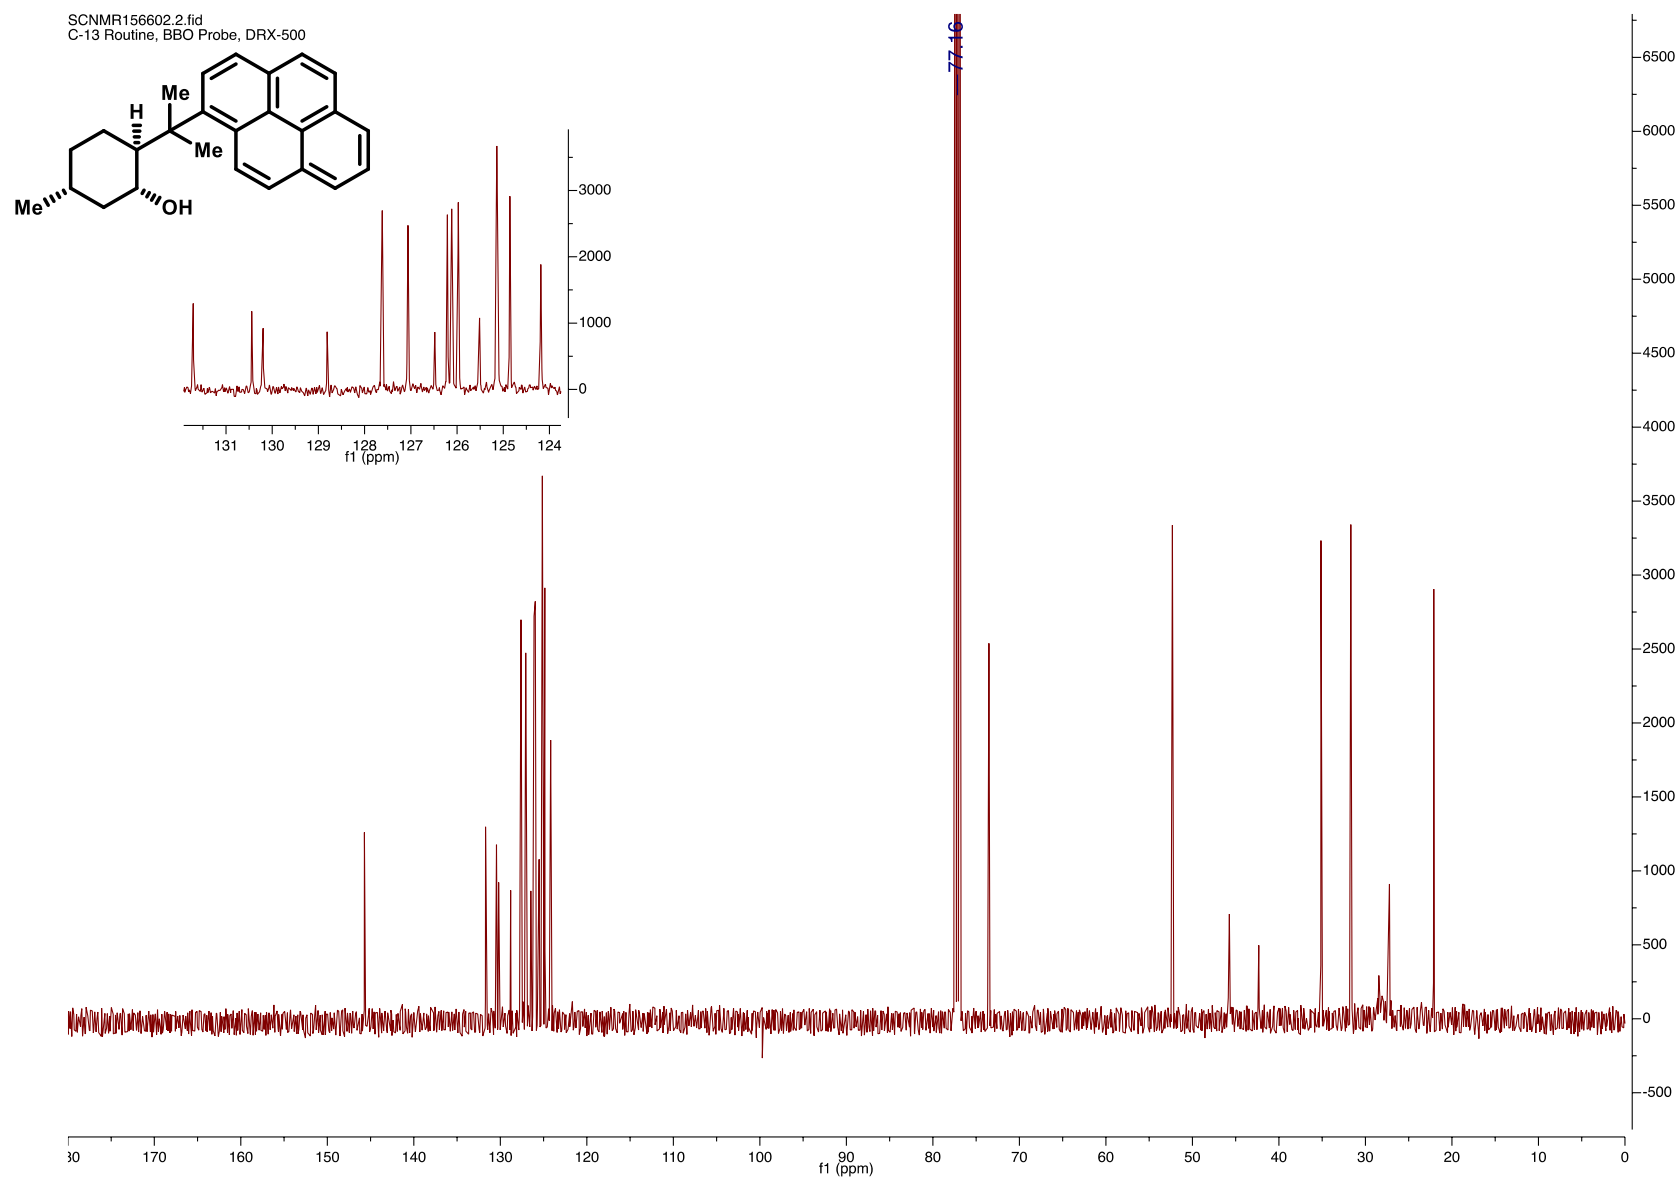

SCNMR156602 pyrene.pdt.2.fid  
C-13 Routine, BBO Probe, DRX-500

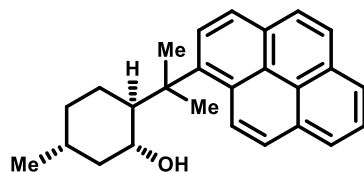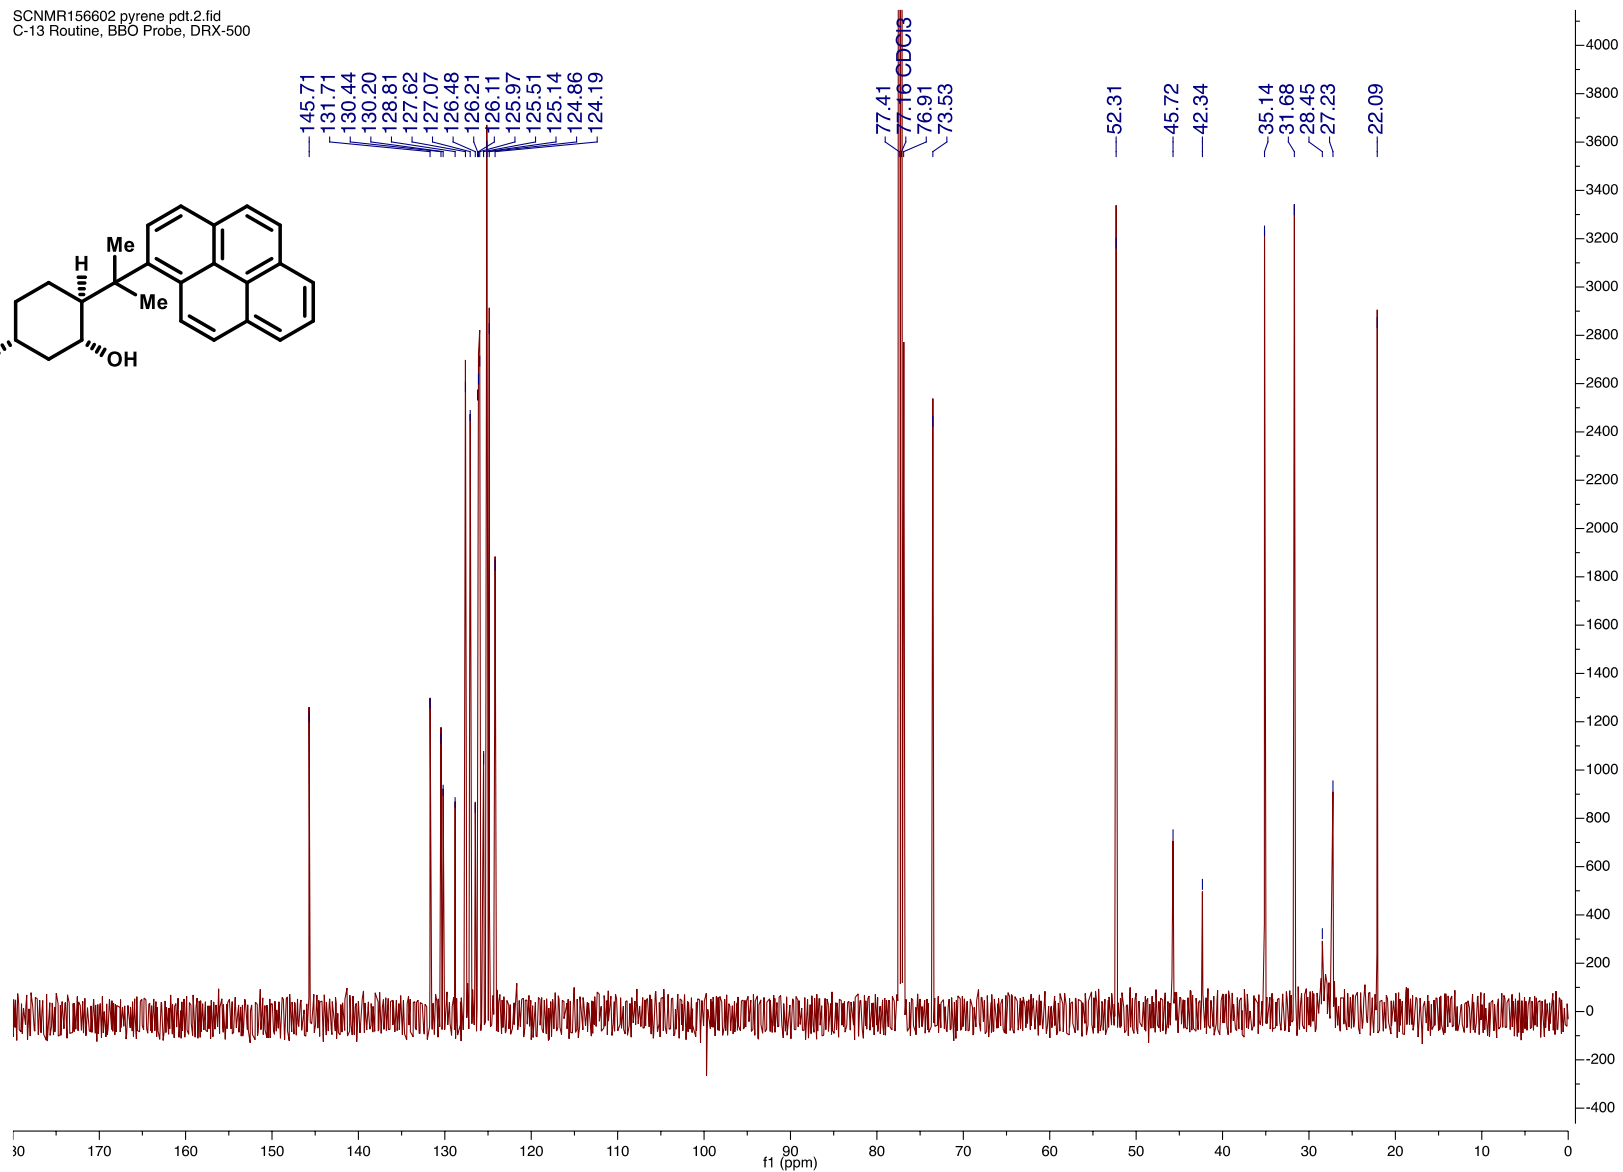

SI-12: <sup>1</sup>H-NMR

SCNMR120102.1.fid

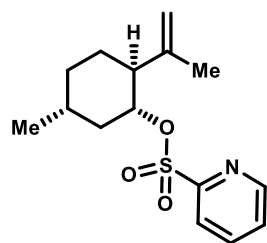

— 7.26 CDCl<sub>3</sub>

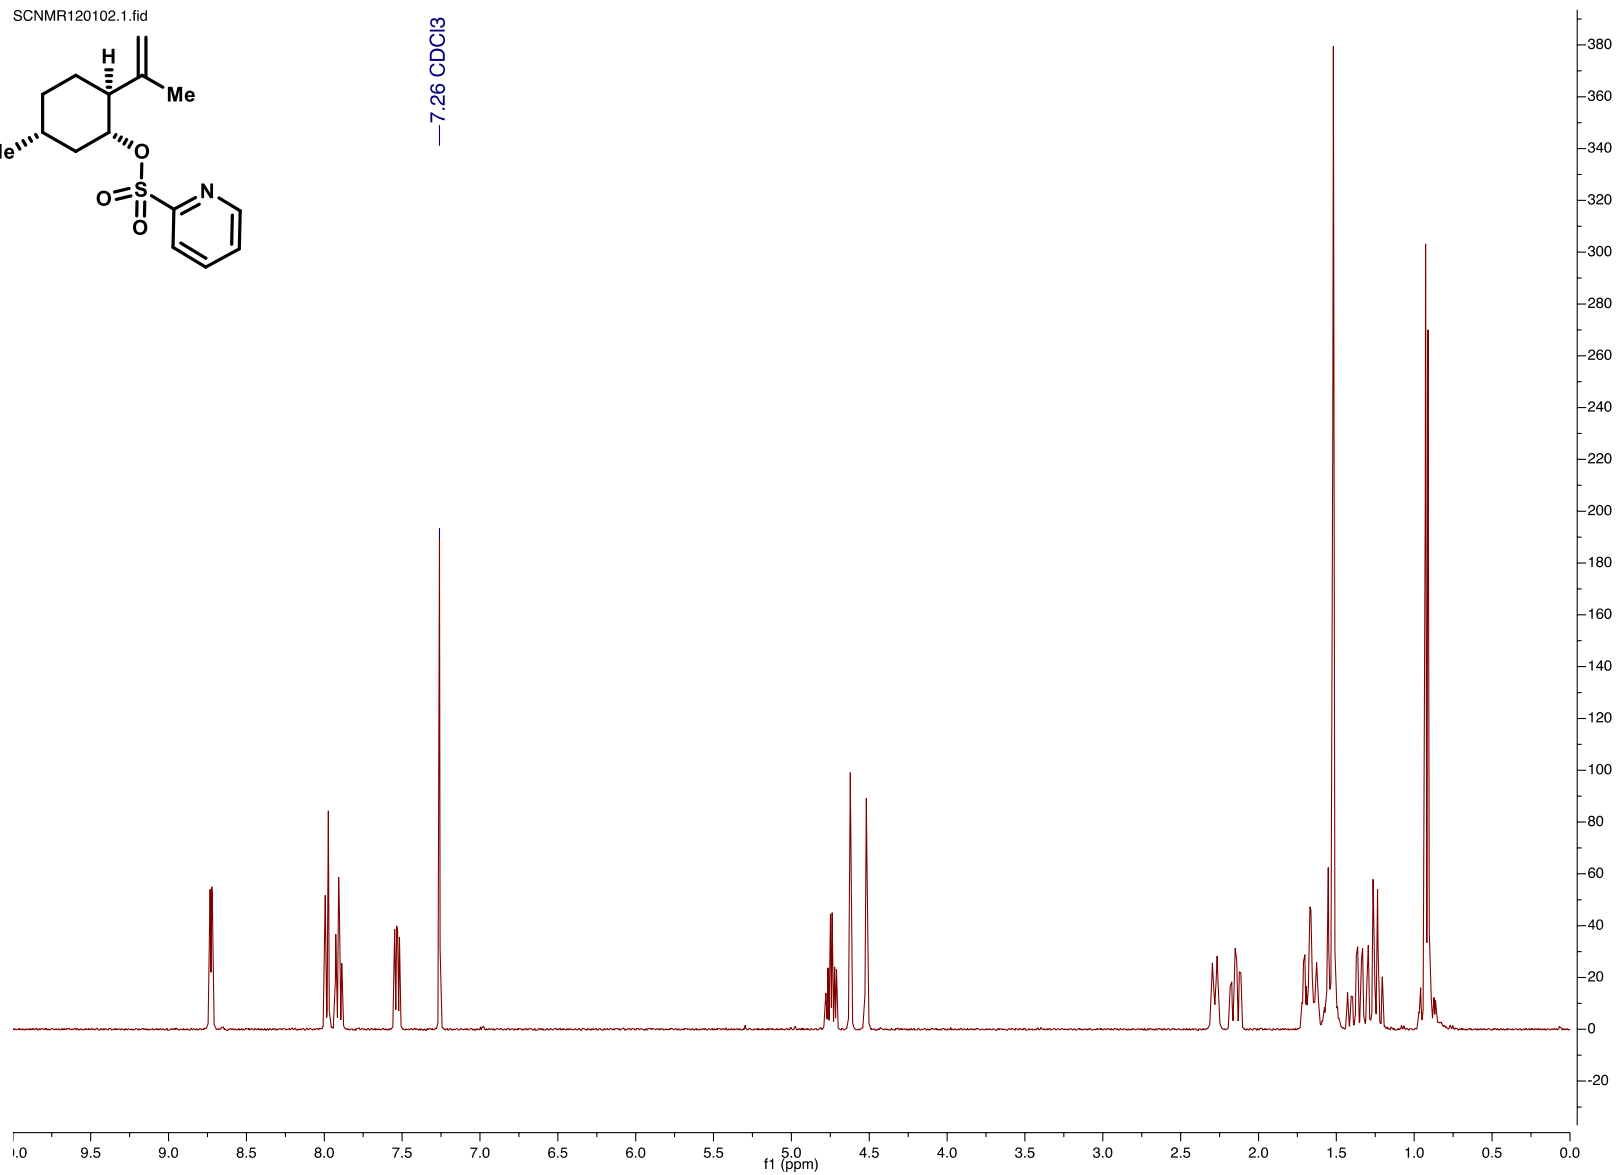

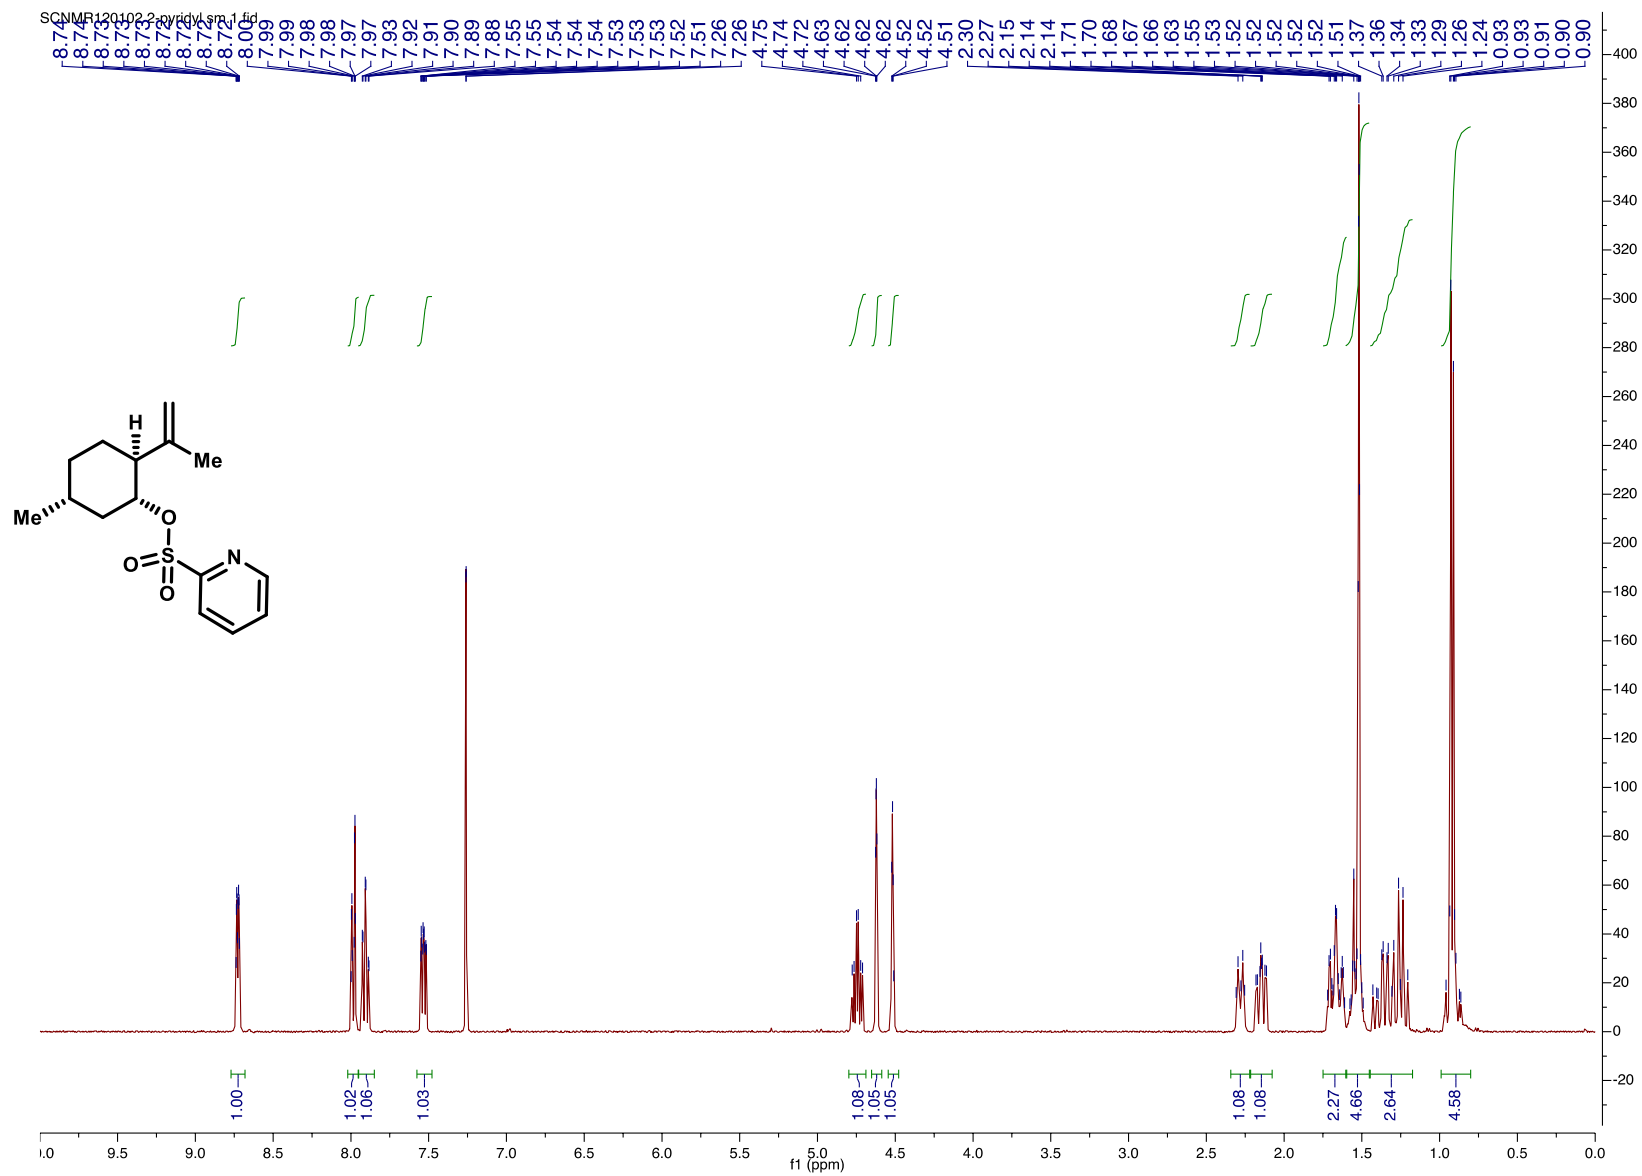

SI-12:  $^{13}\text{C}$ -NMR DEPT-Q

SCNMR120102.2.fid  
C-13 DEPTQ (APT) 1D, CPDCH CryoProbe, AVIII-600

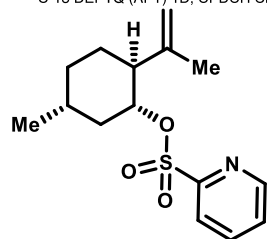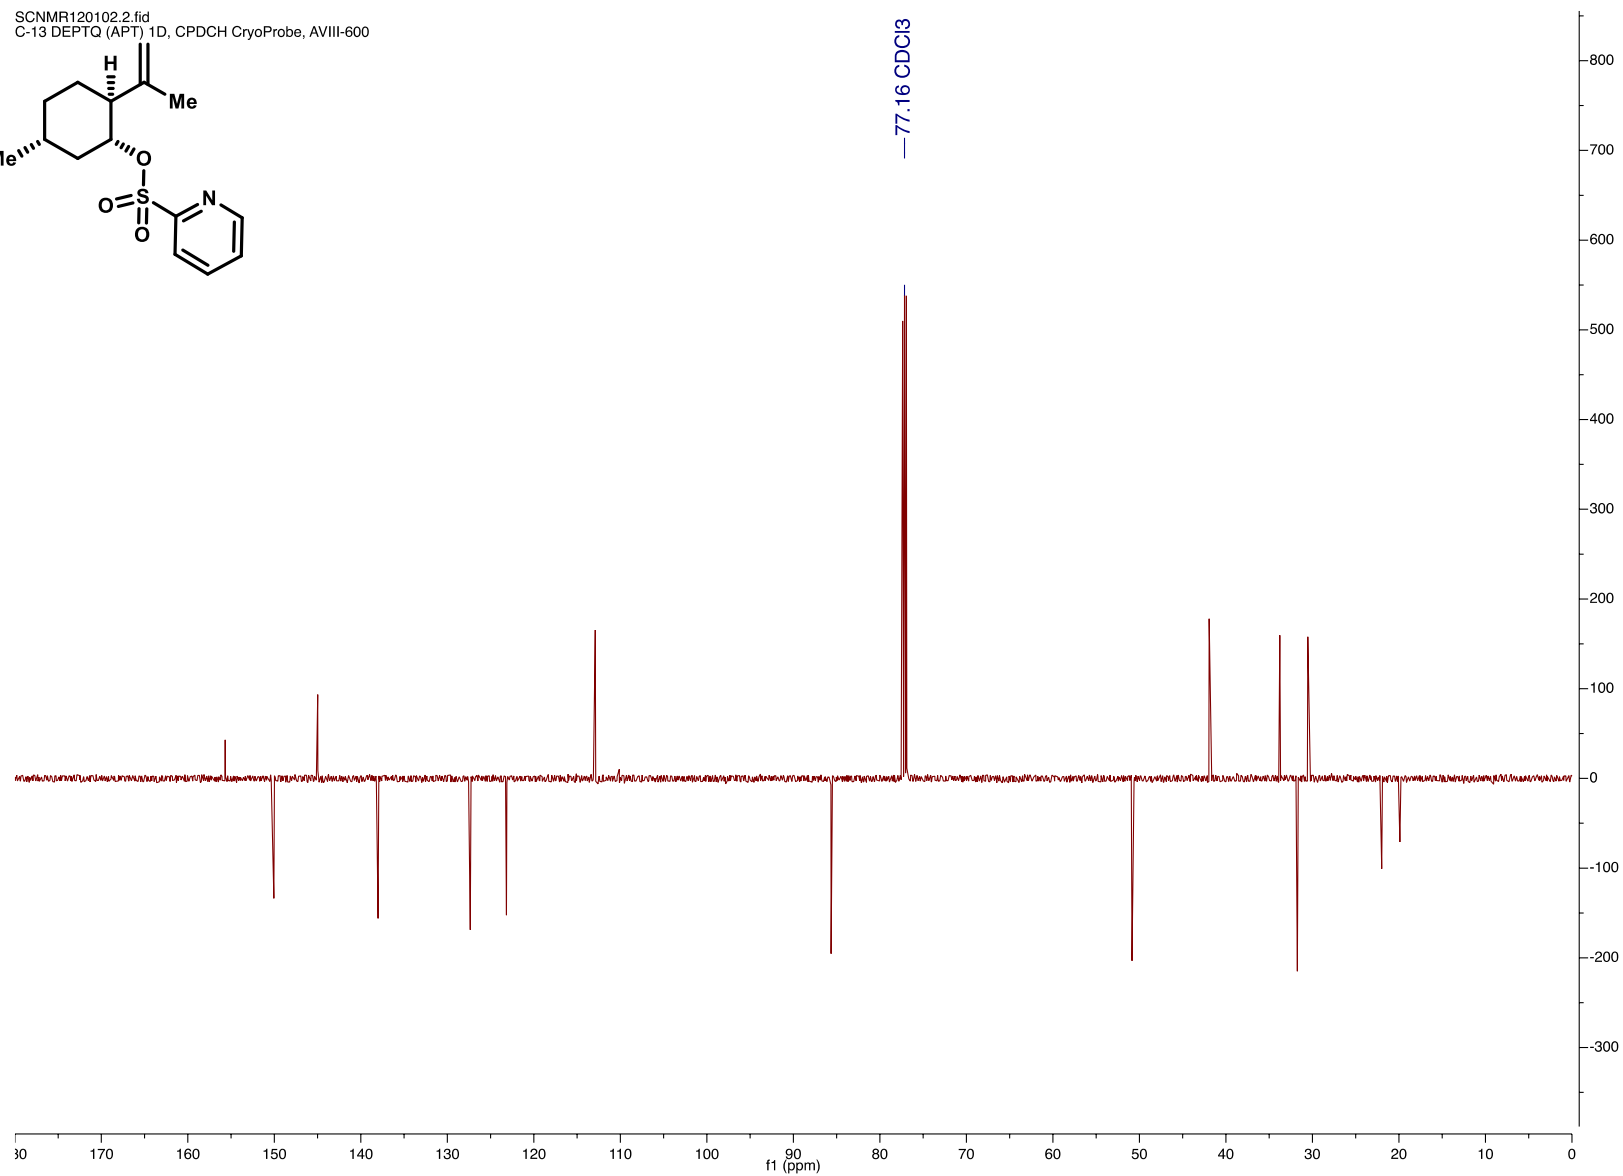

SCNMR120102 2-pyridyl sm.2.fid  
C-13 DEPTQ (APT) 1D, CPDCH CryoProbe, AVIII-600

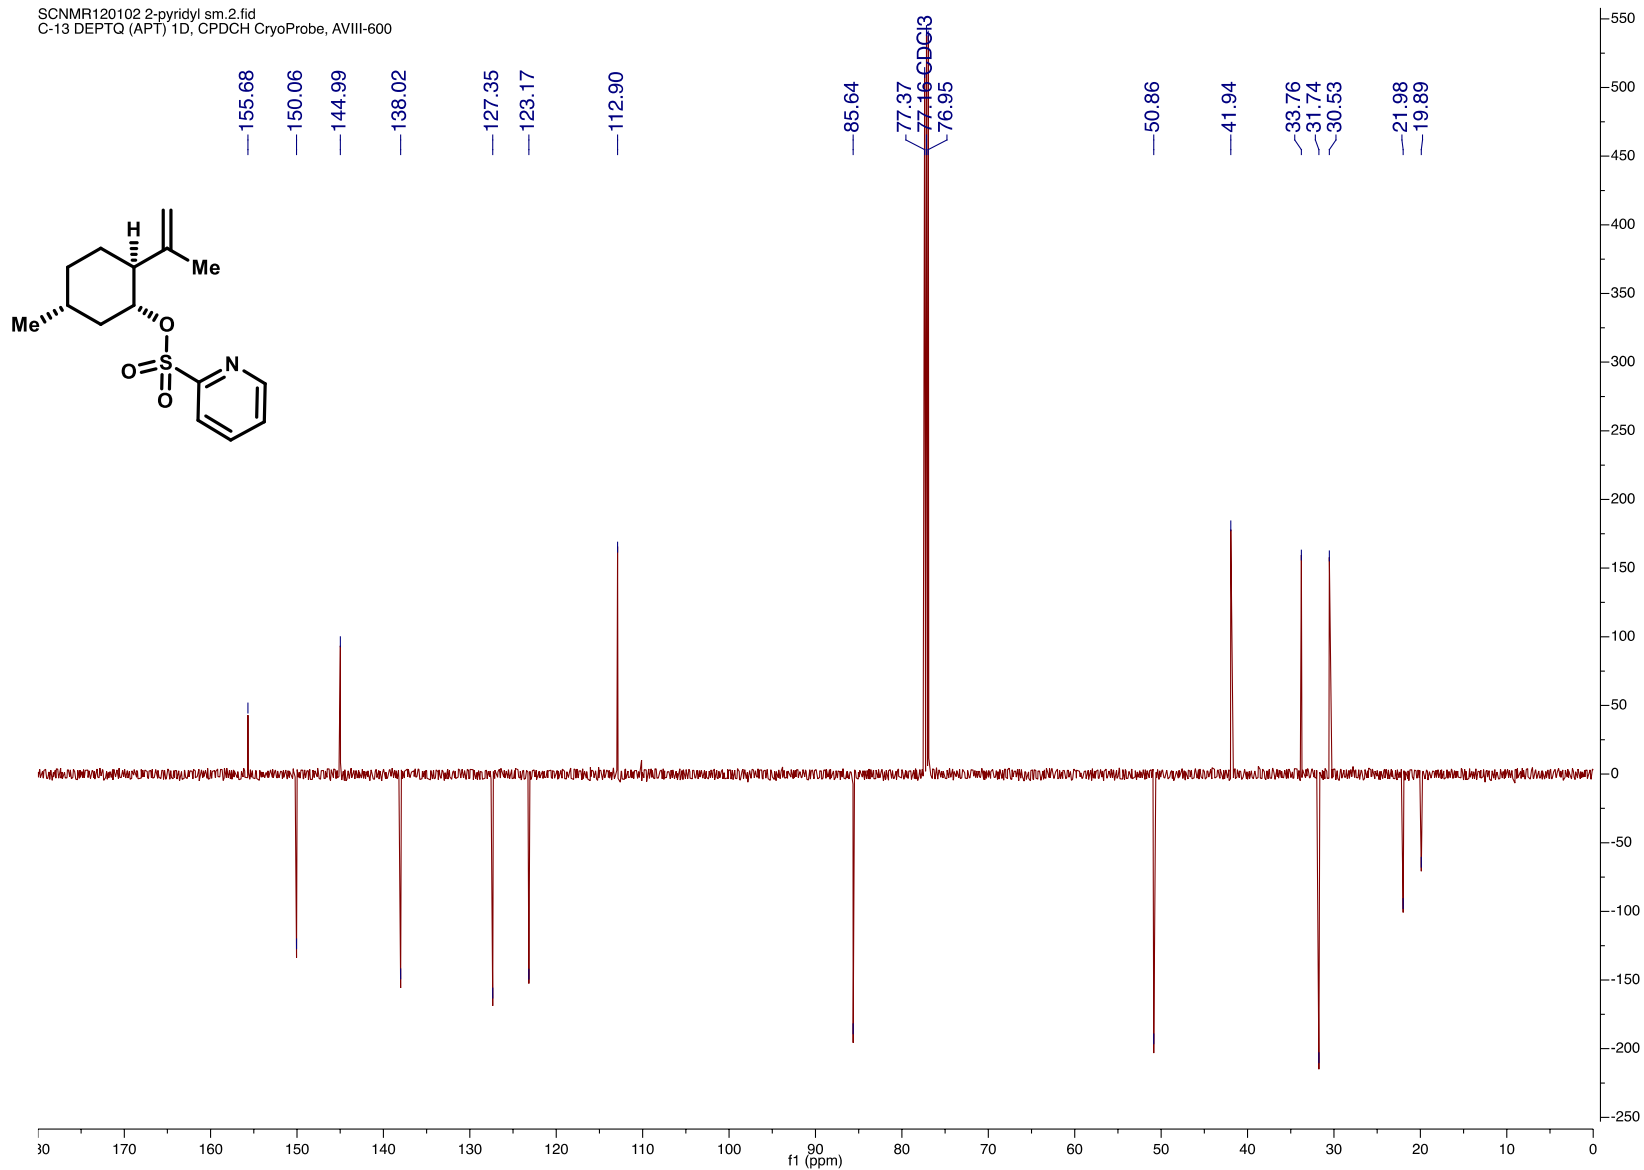

# 10: <sup>1</sup>H-NMR

SCNMR134601.1.fid  
H-1 Routine, CP-DCH, AVIII HD-600

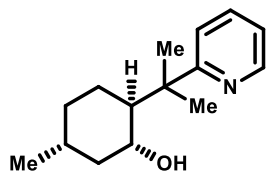

— 7.26 CDCl<sub>3</sub>

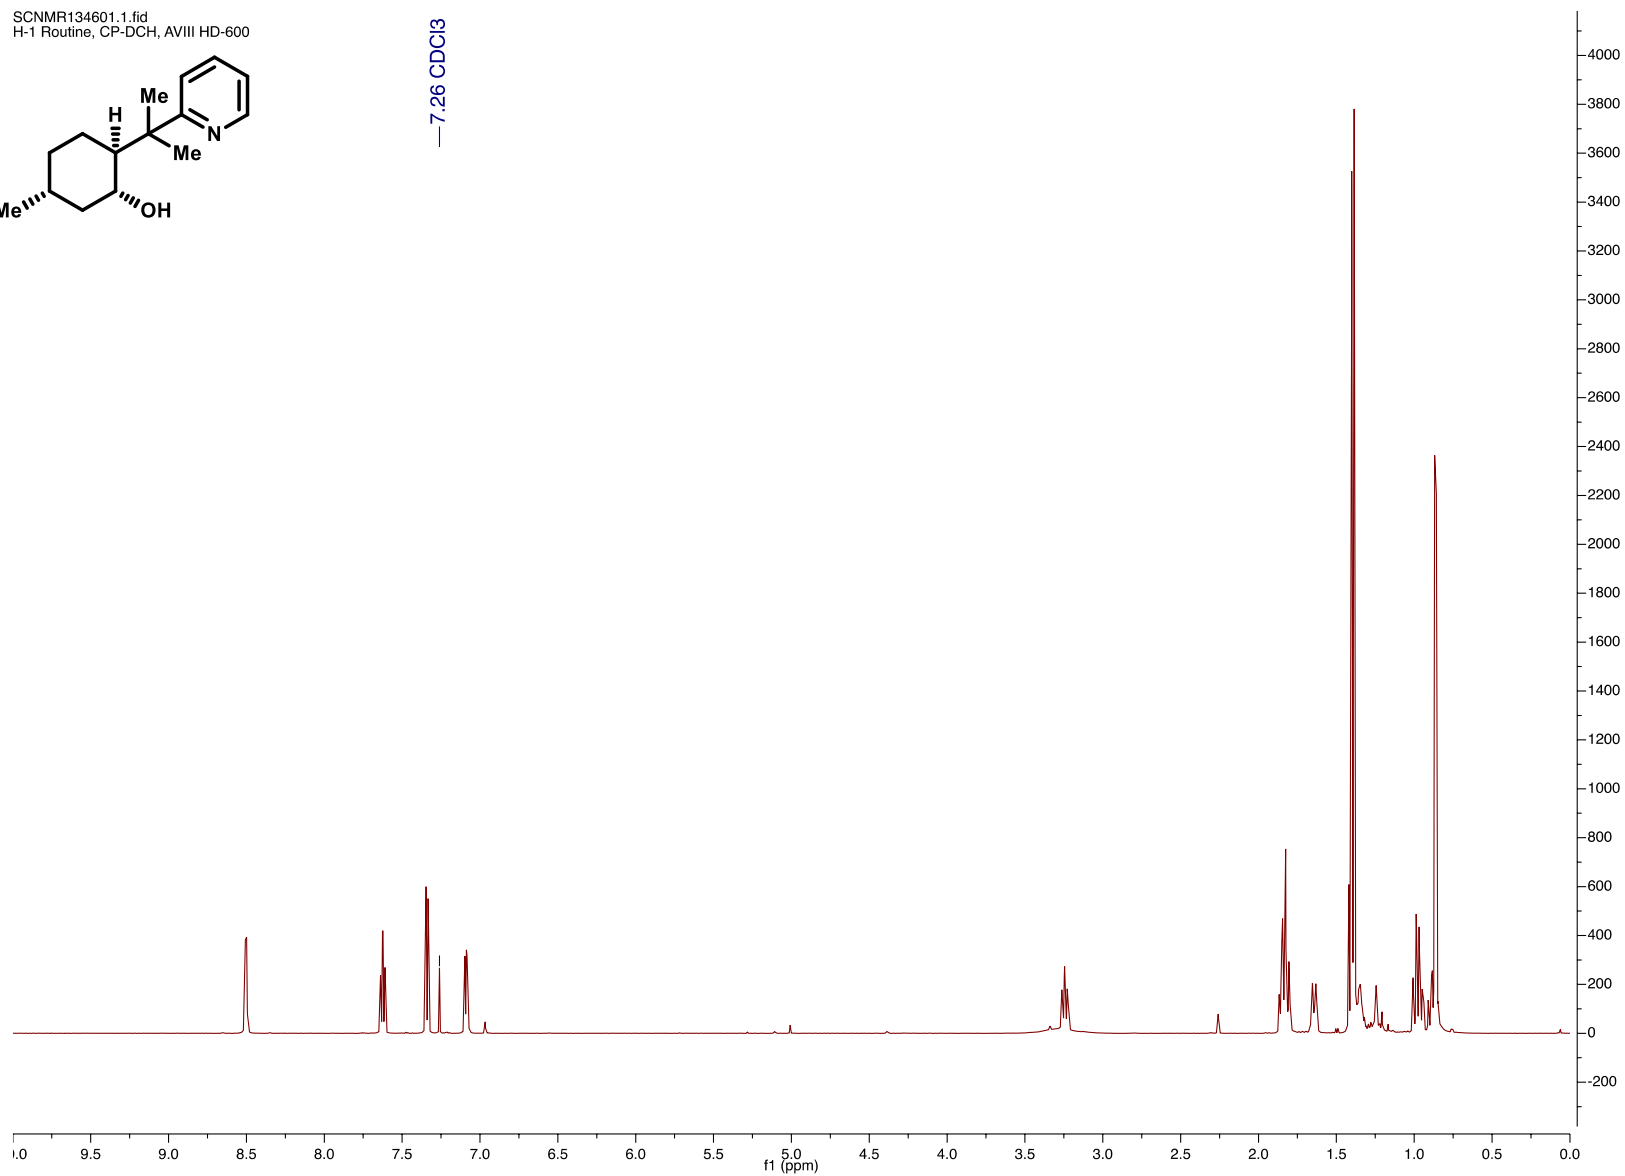

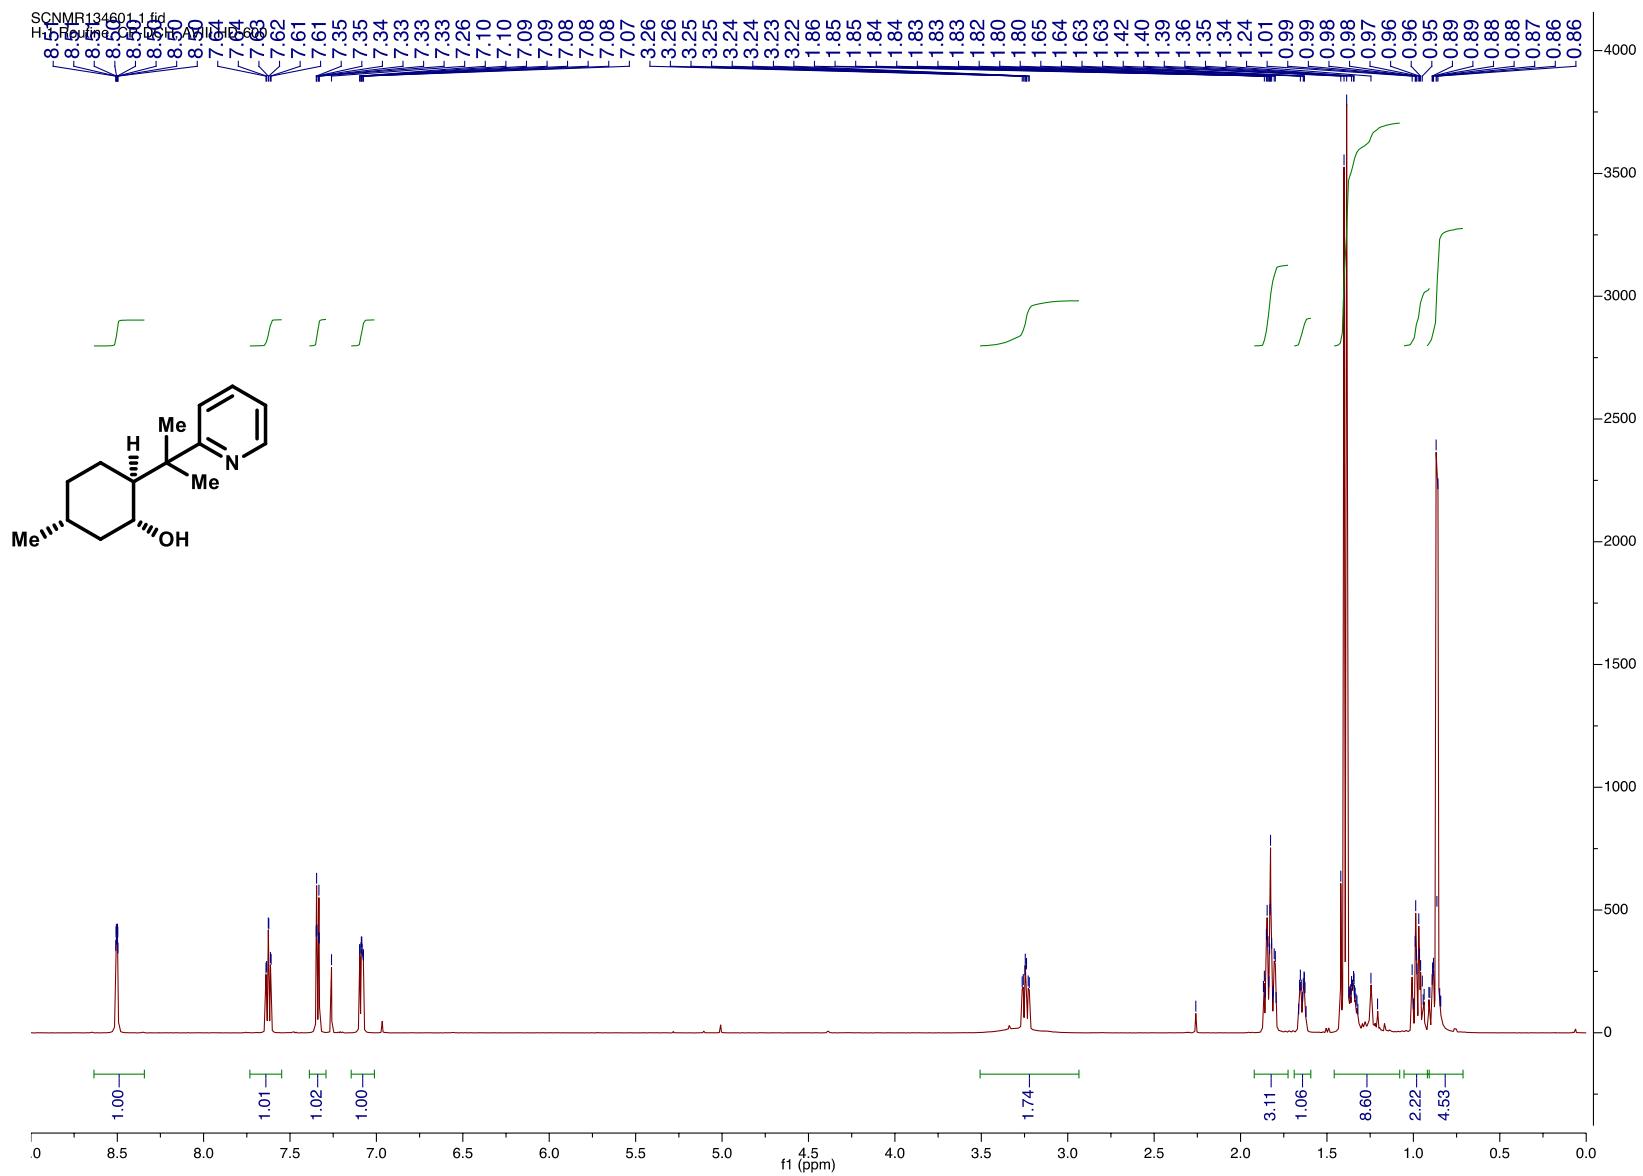



10:  $^{13}\text{C}$ -NMR

SCNMR134601.2.fid  
C-13 Routine 1D, CPDCH CryoProbe, AVIII-600

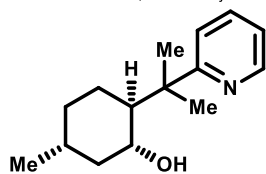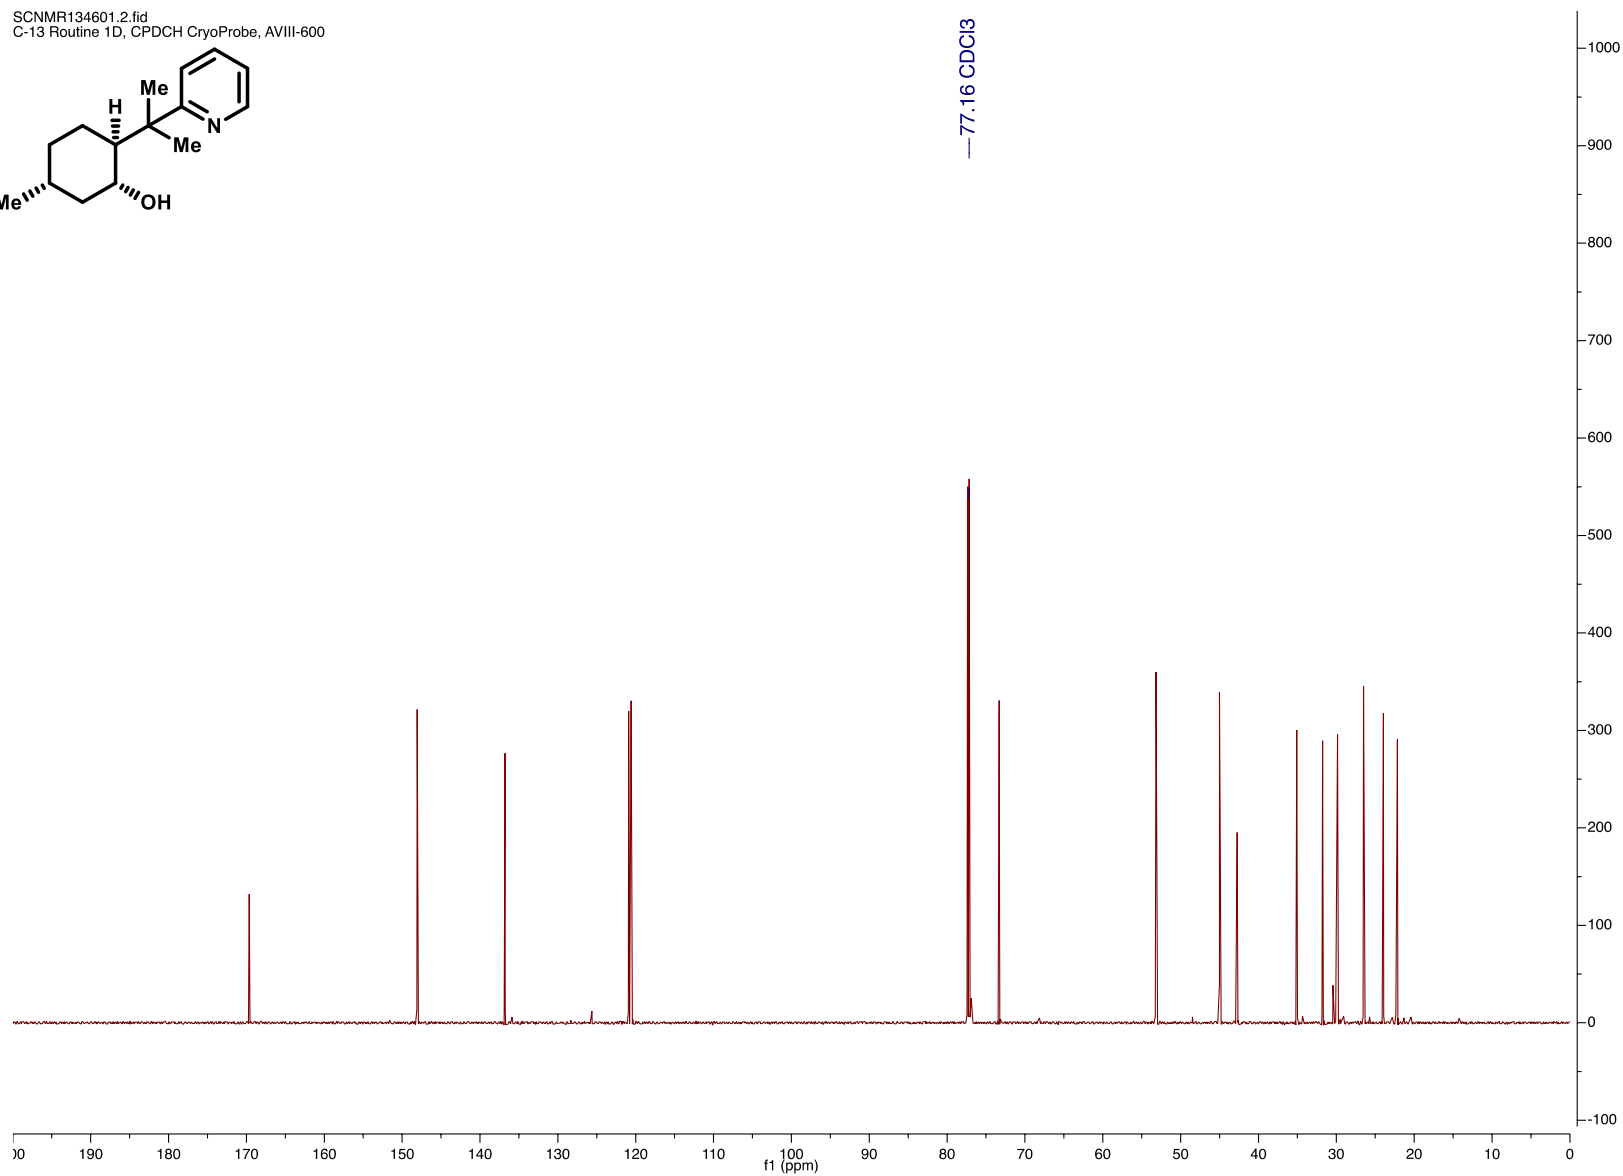

SCNMR134601.2.fid  
C-13 Routine 1D, CPDCH CryoProbe, AVIII-600

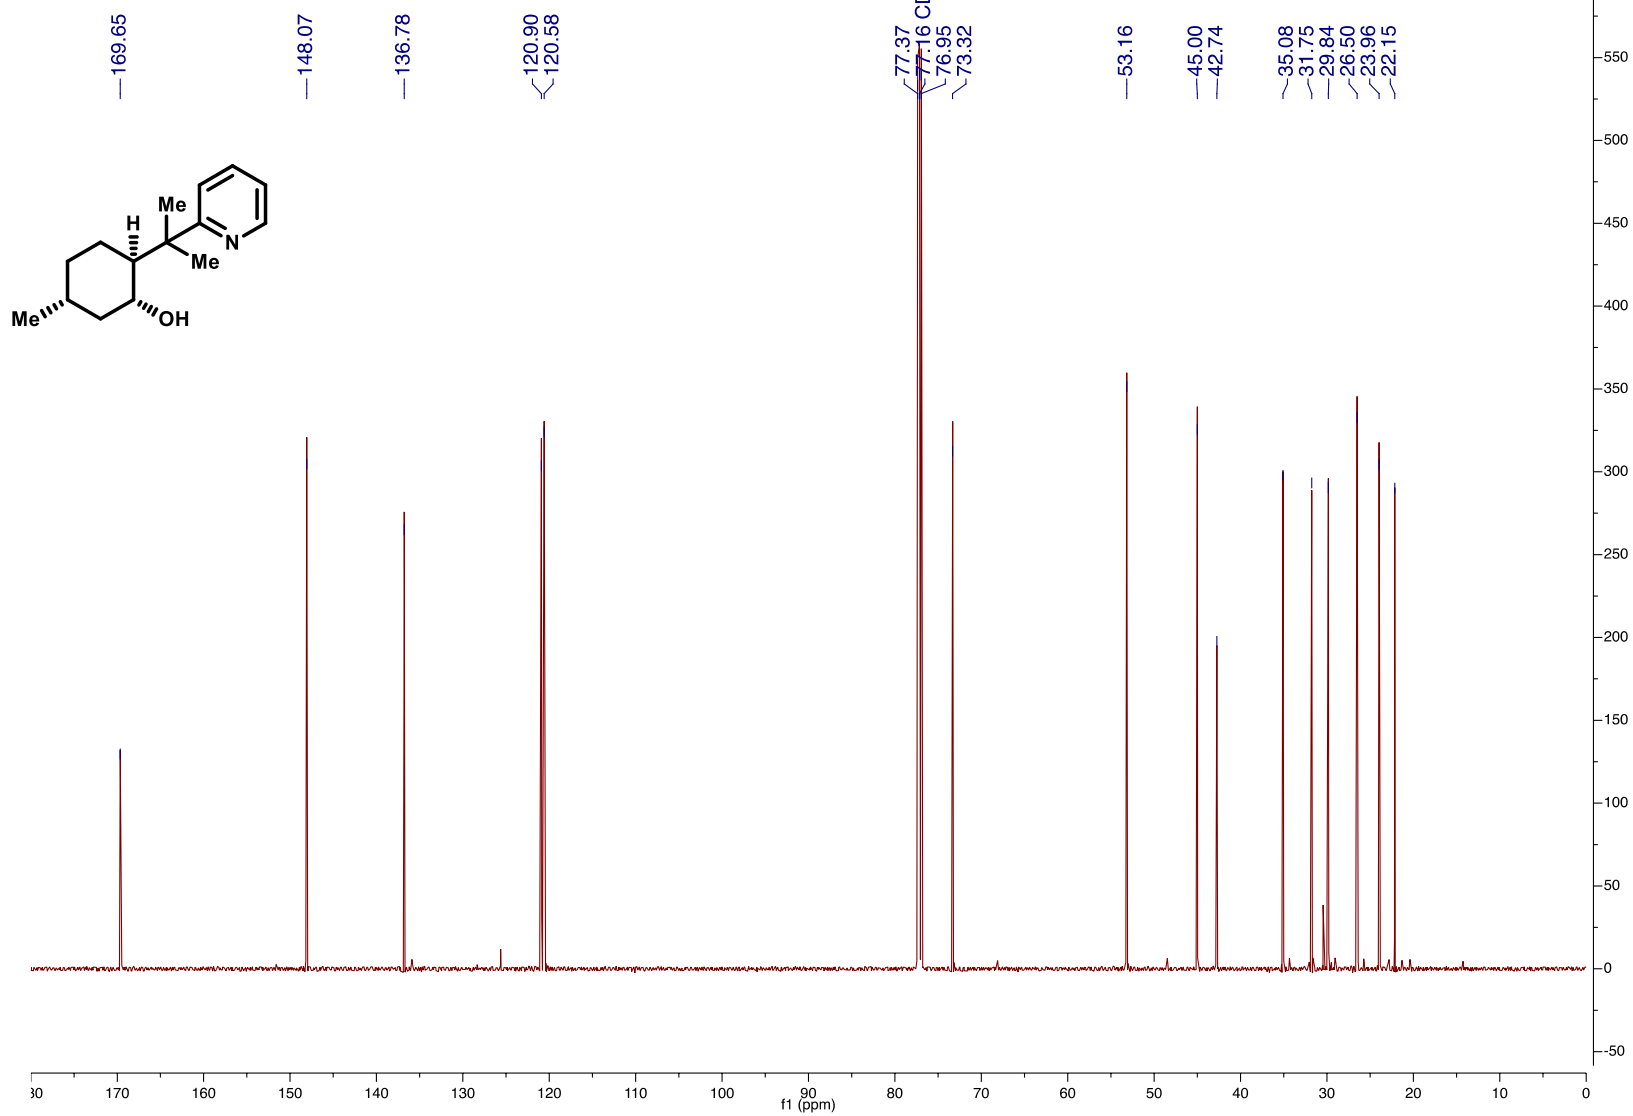

SI-13: <sup>1</sup>H-NMR

SCNMR136001.1.fid  
H-1 Routine, CP-DCH, AVIII HD-600

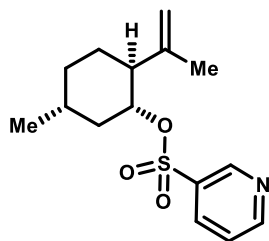

— 7.26 CDCl<sub>3</sub>

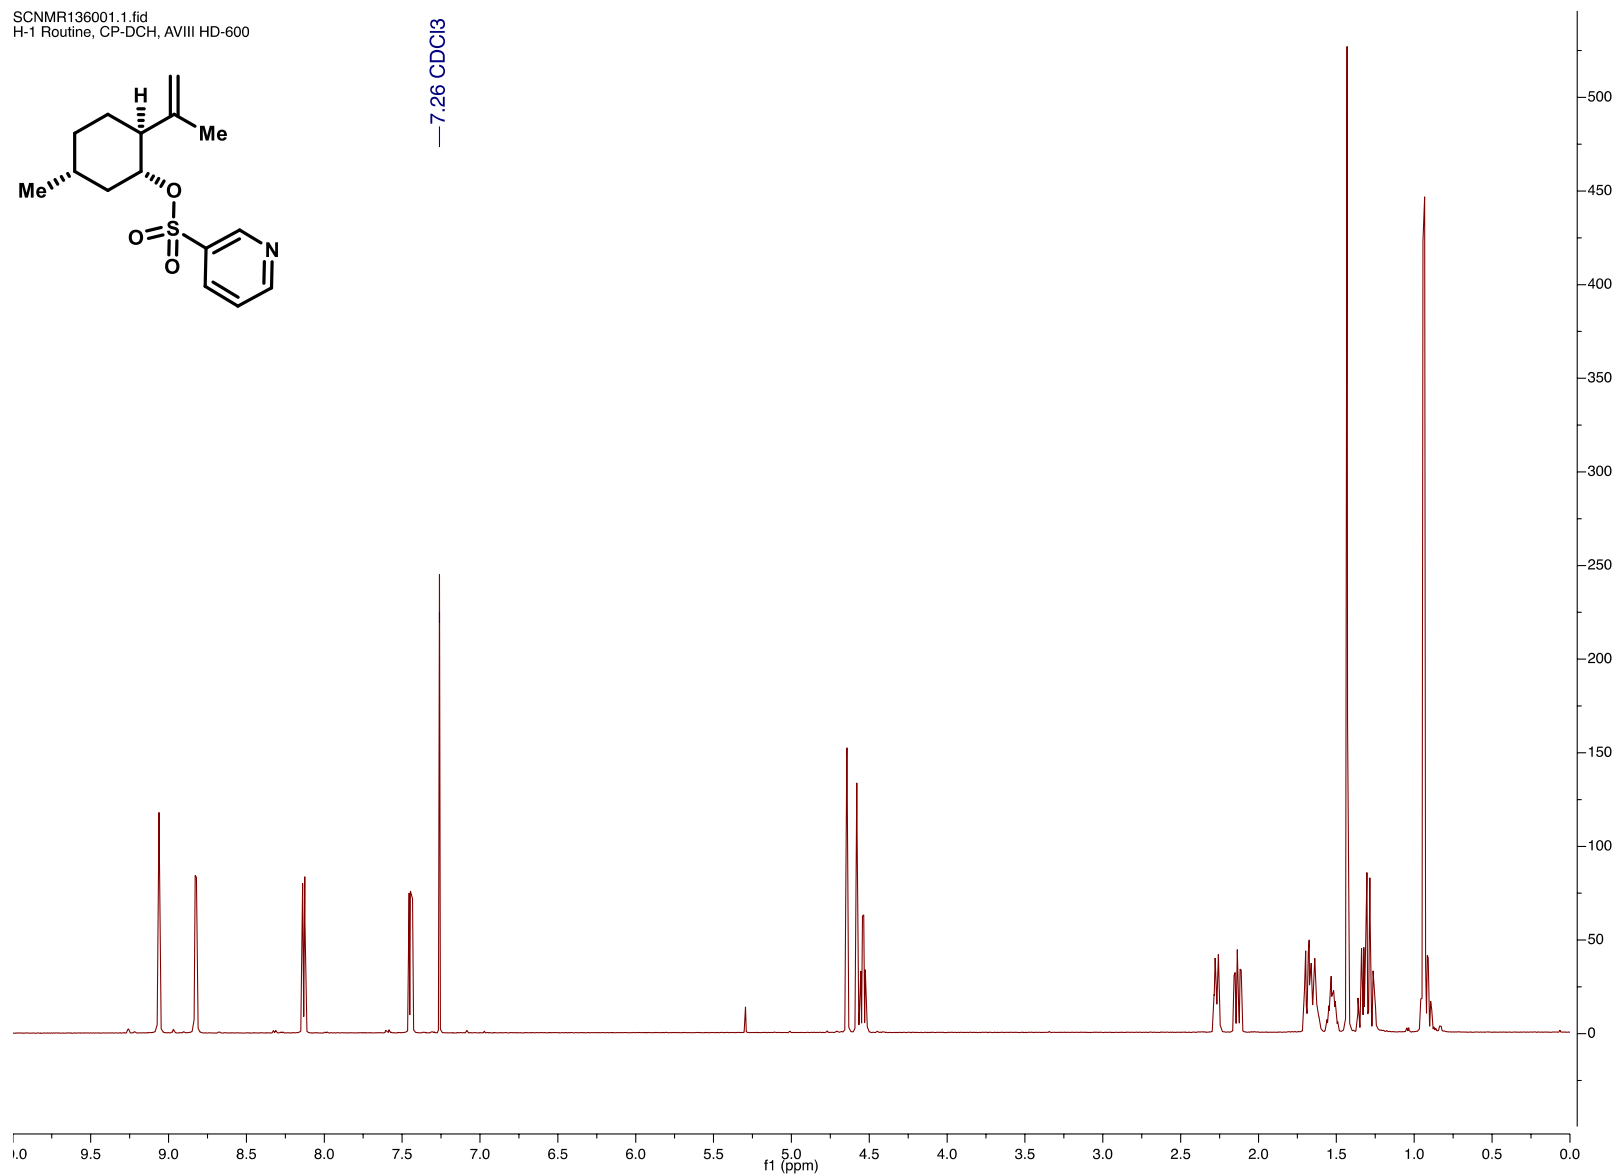

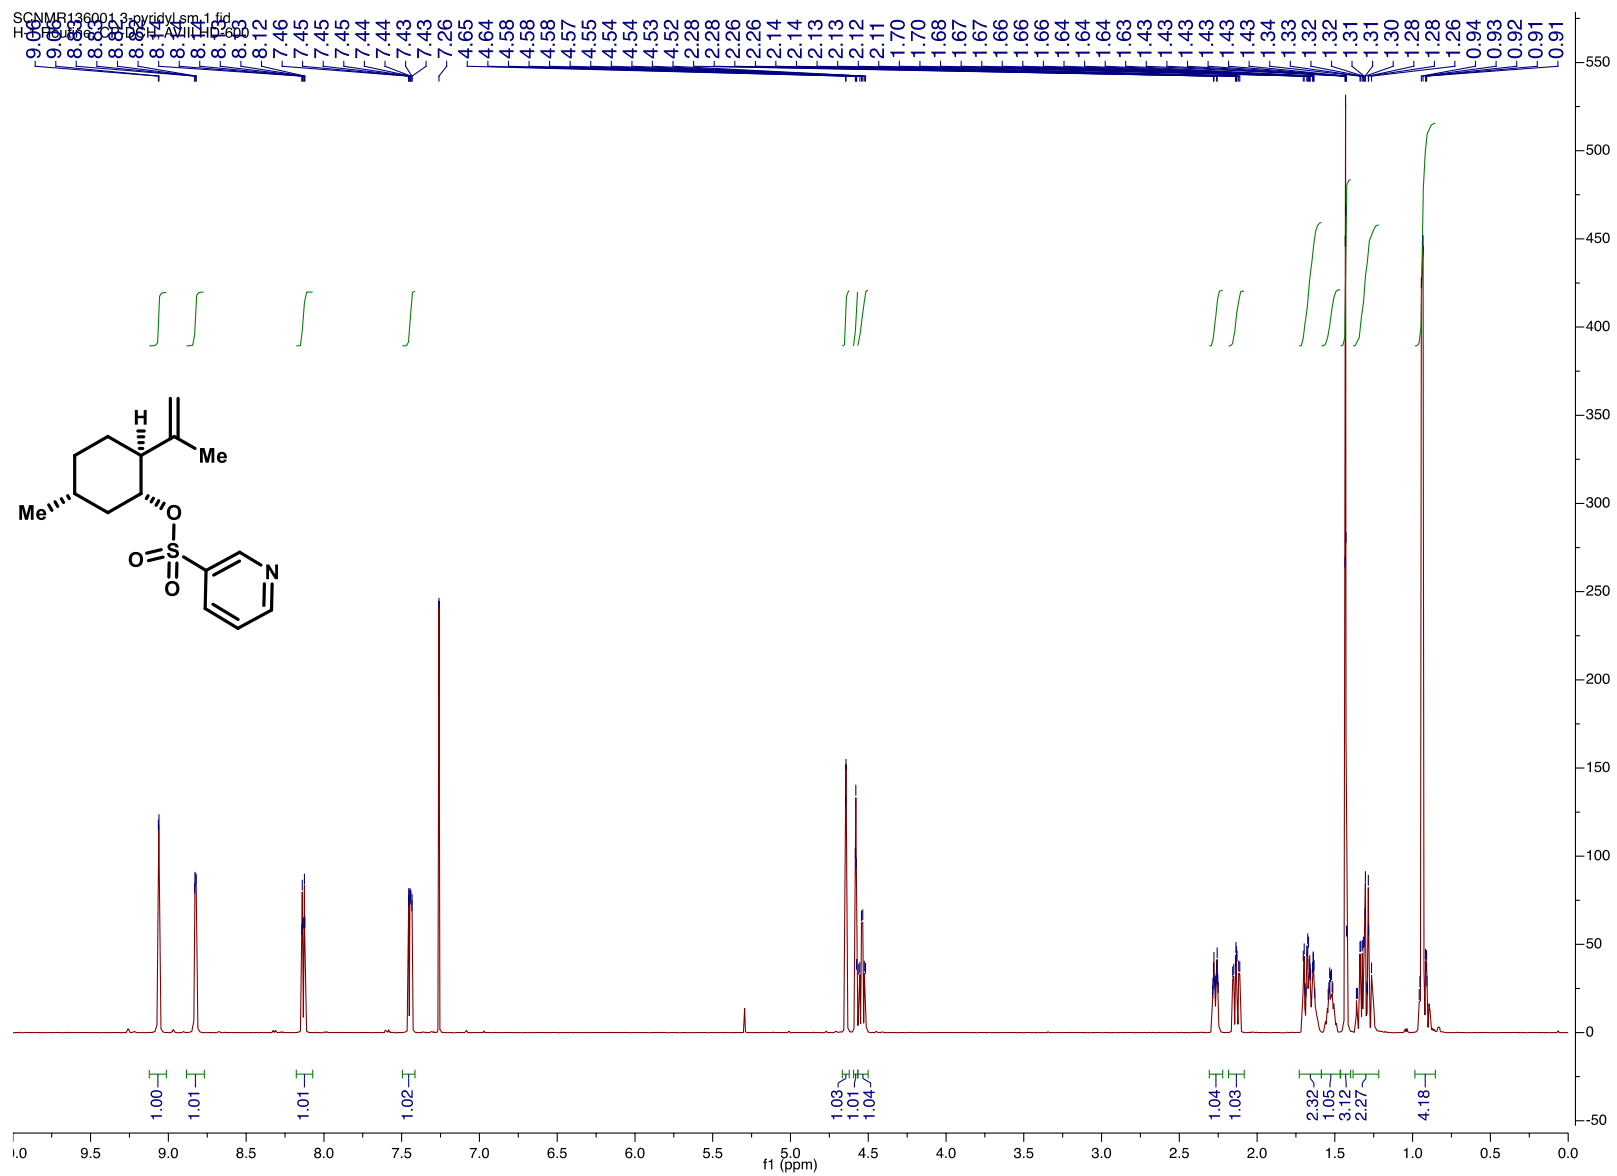

SI-13:  $^{13}\text{C}$ -NMR

SCNMR136001.2.fid  
C-13 Routine 1D, CPDCH CryoProbe, AVIII-600

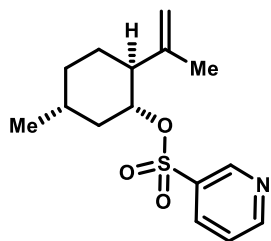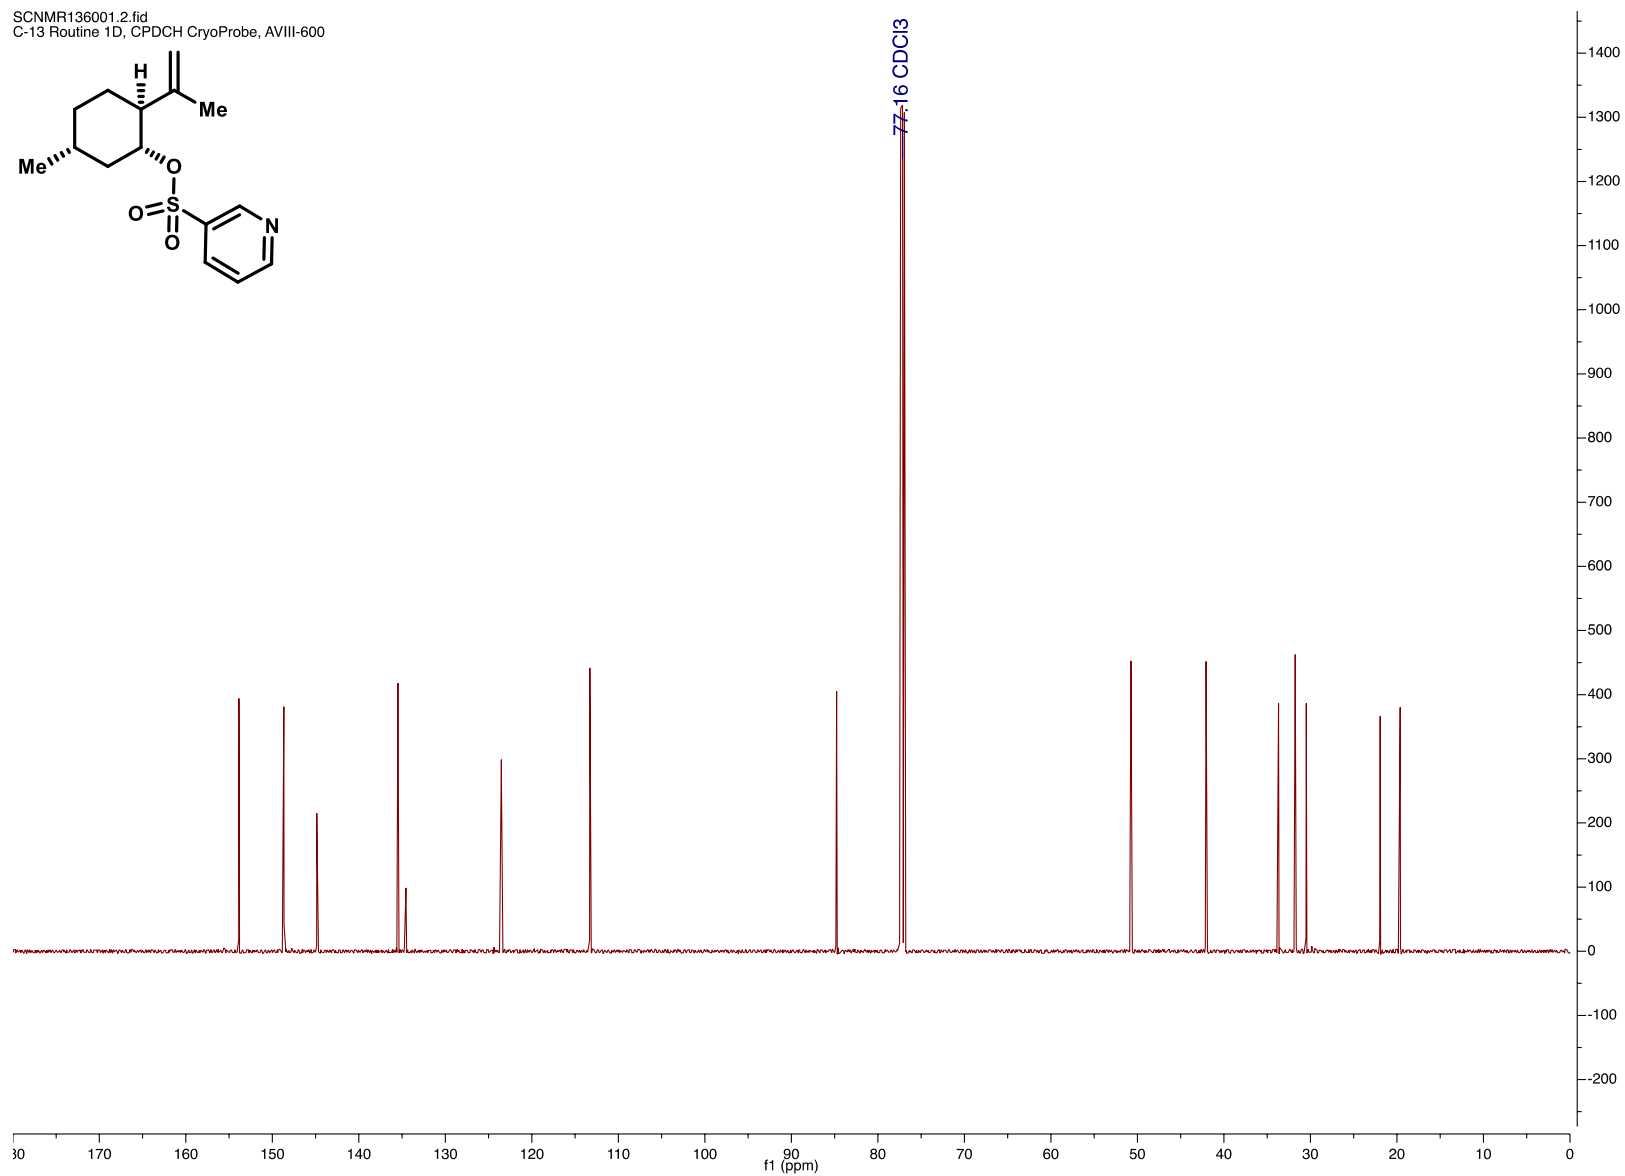

SCNMR136001 3-pyridyl sm.2.fid  
C-13 Routine 1D, CPDCH CryoProbe, AVIII-600

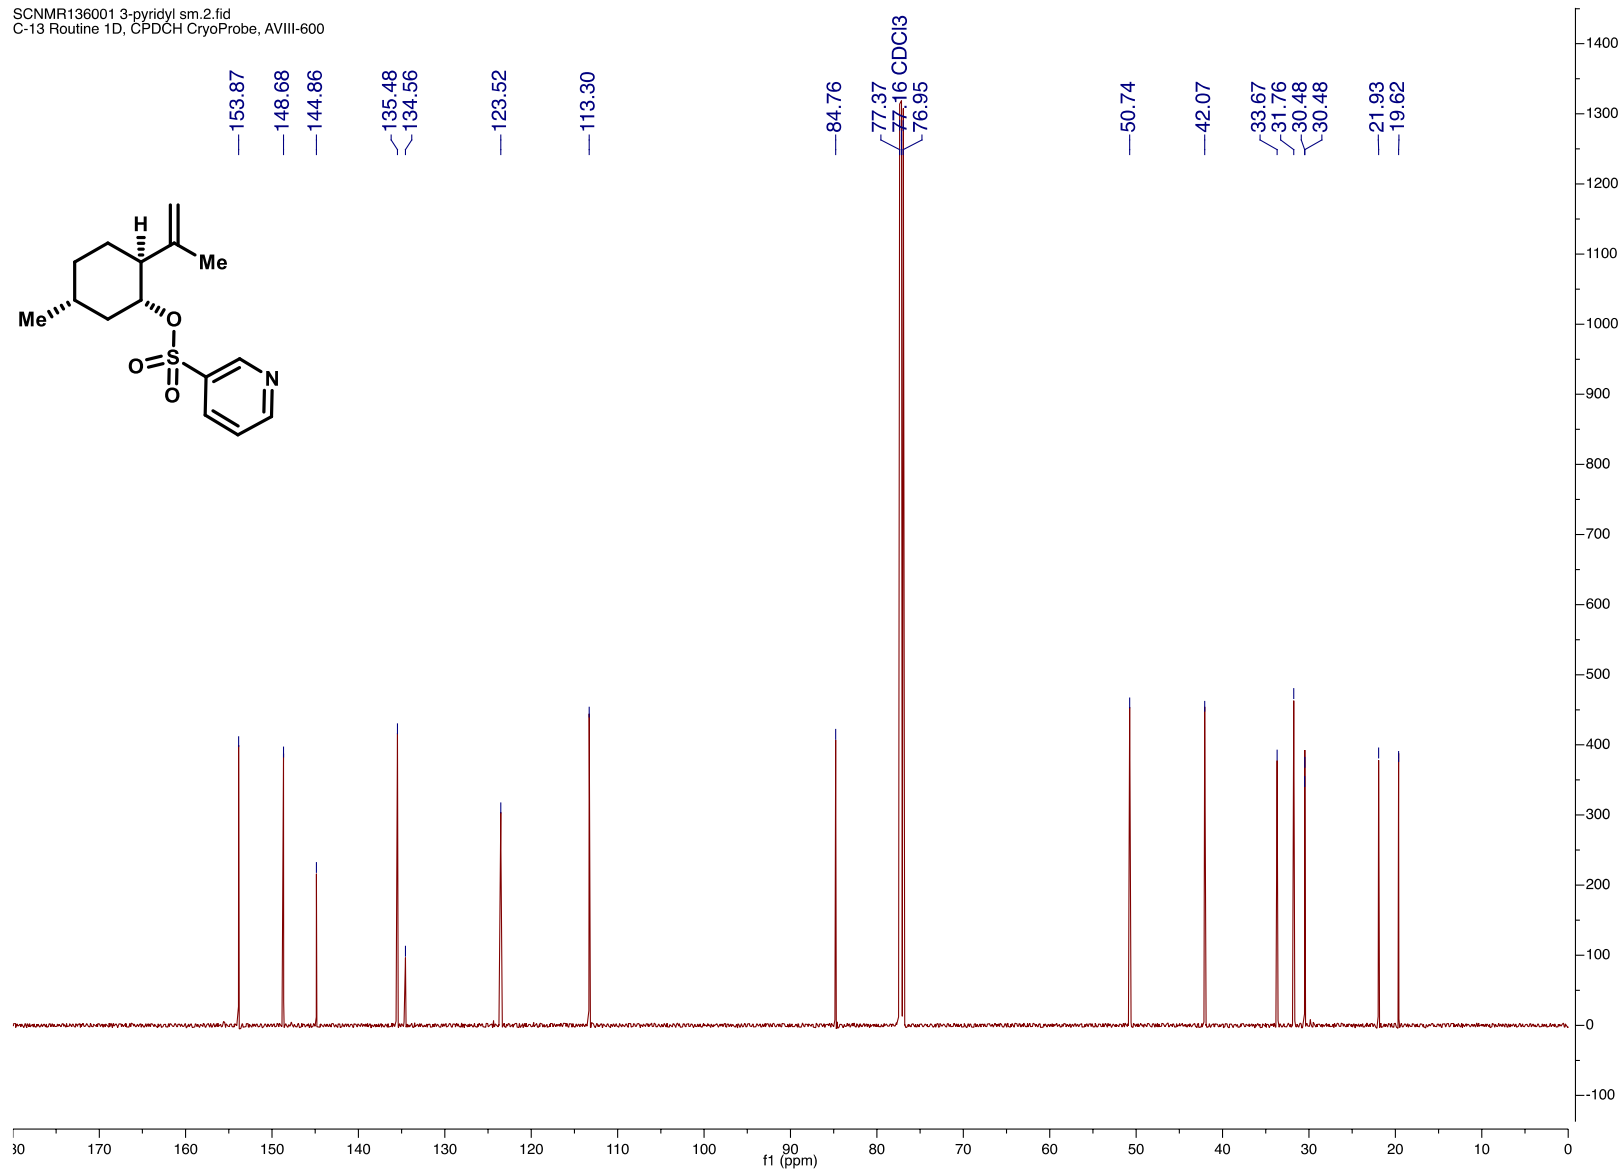

11:  $^1\text{H}$ -NMR,  $\text{CDCl}_3$

SCNMR152603 3-pyridyl pure .1.fid  
H-1 Routine, CP-DCH, AVIII HD-600

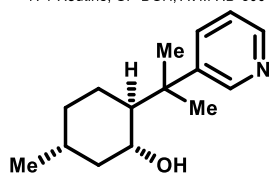

— 7.26  $\text{CDCl}_3$

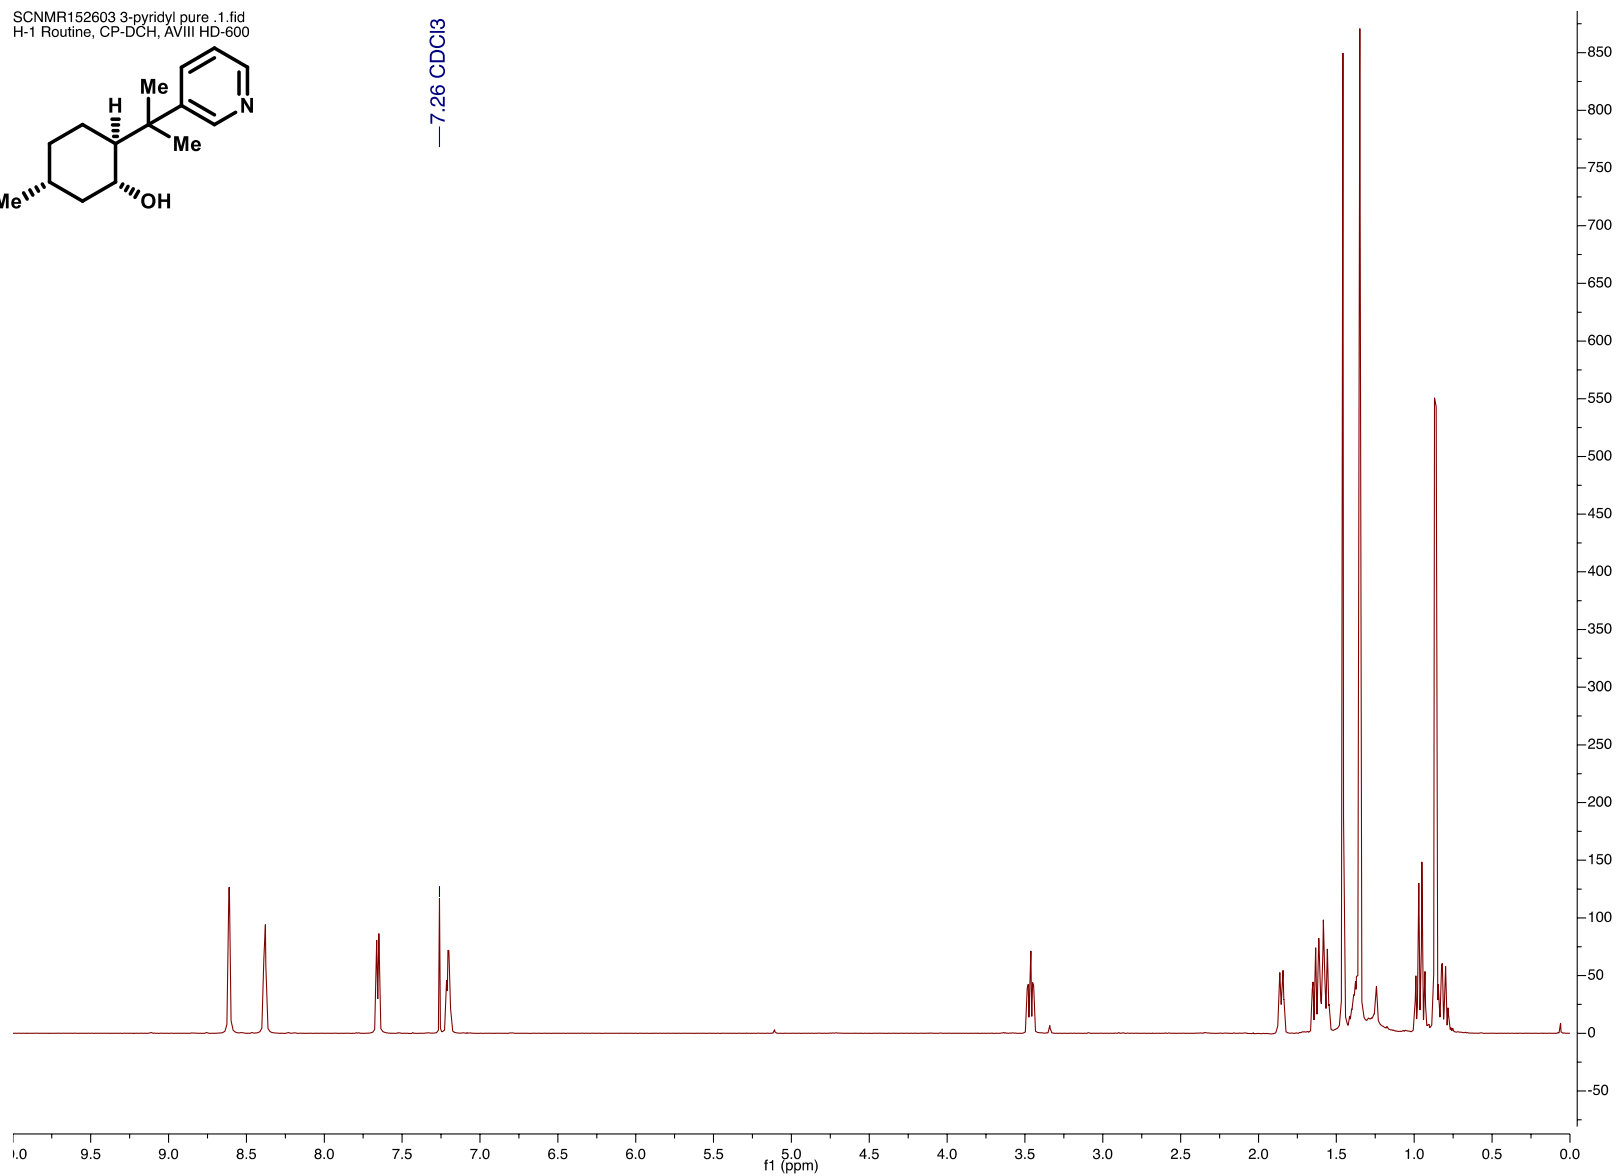

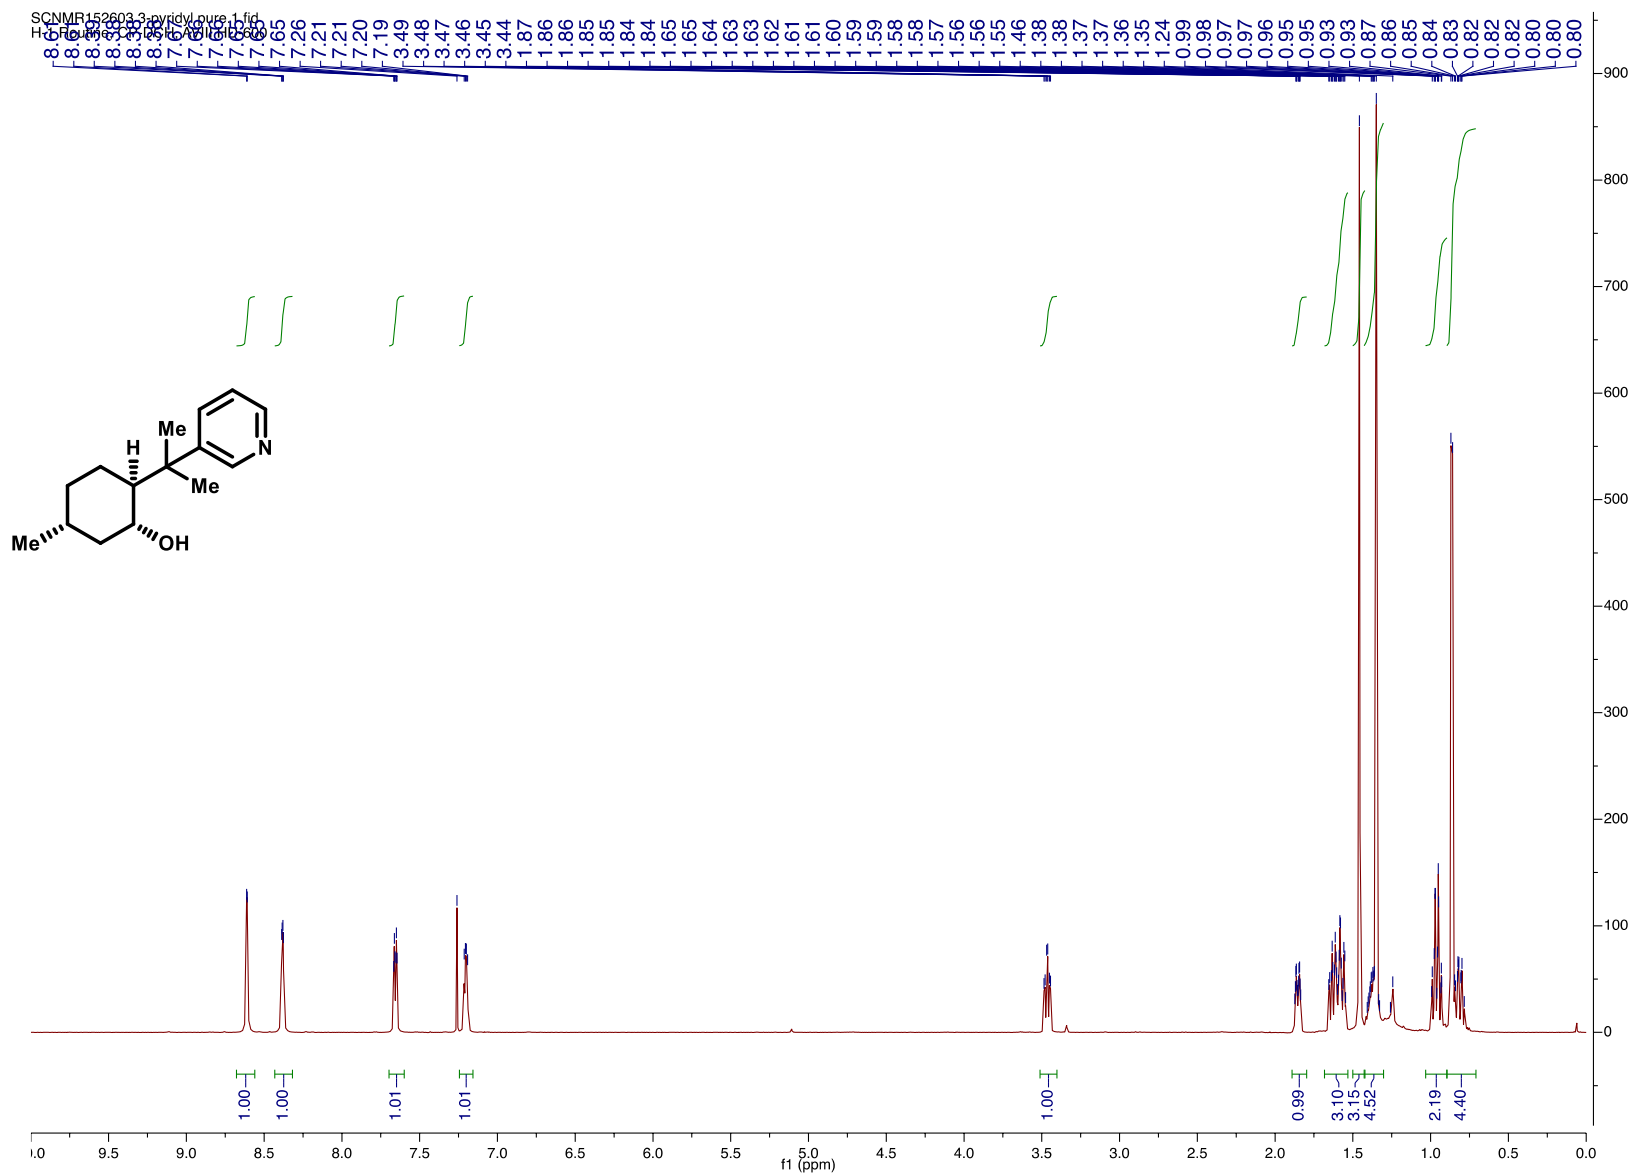



11:  $^{13}\text{C}$ -NMR, DEPT-Q,  $\text{CDCl}_3$

SCNMR152603 3-pyridyl pure .2.fid  
C-13 DEPTQ (APT) 1D, CPDCH CryoProbe, AVIII-600

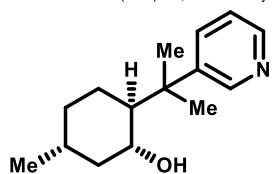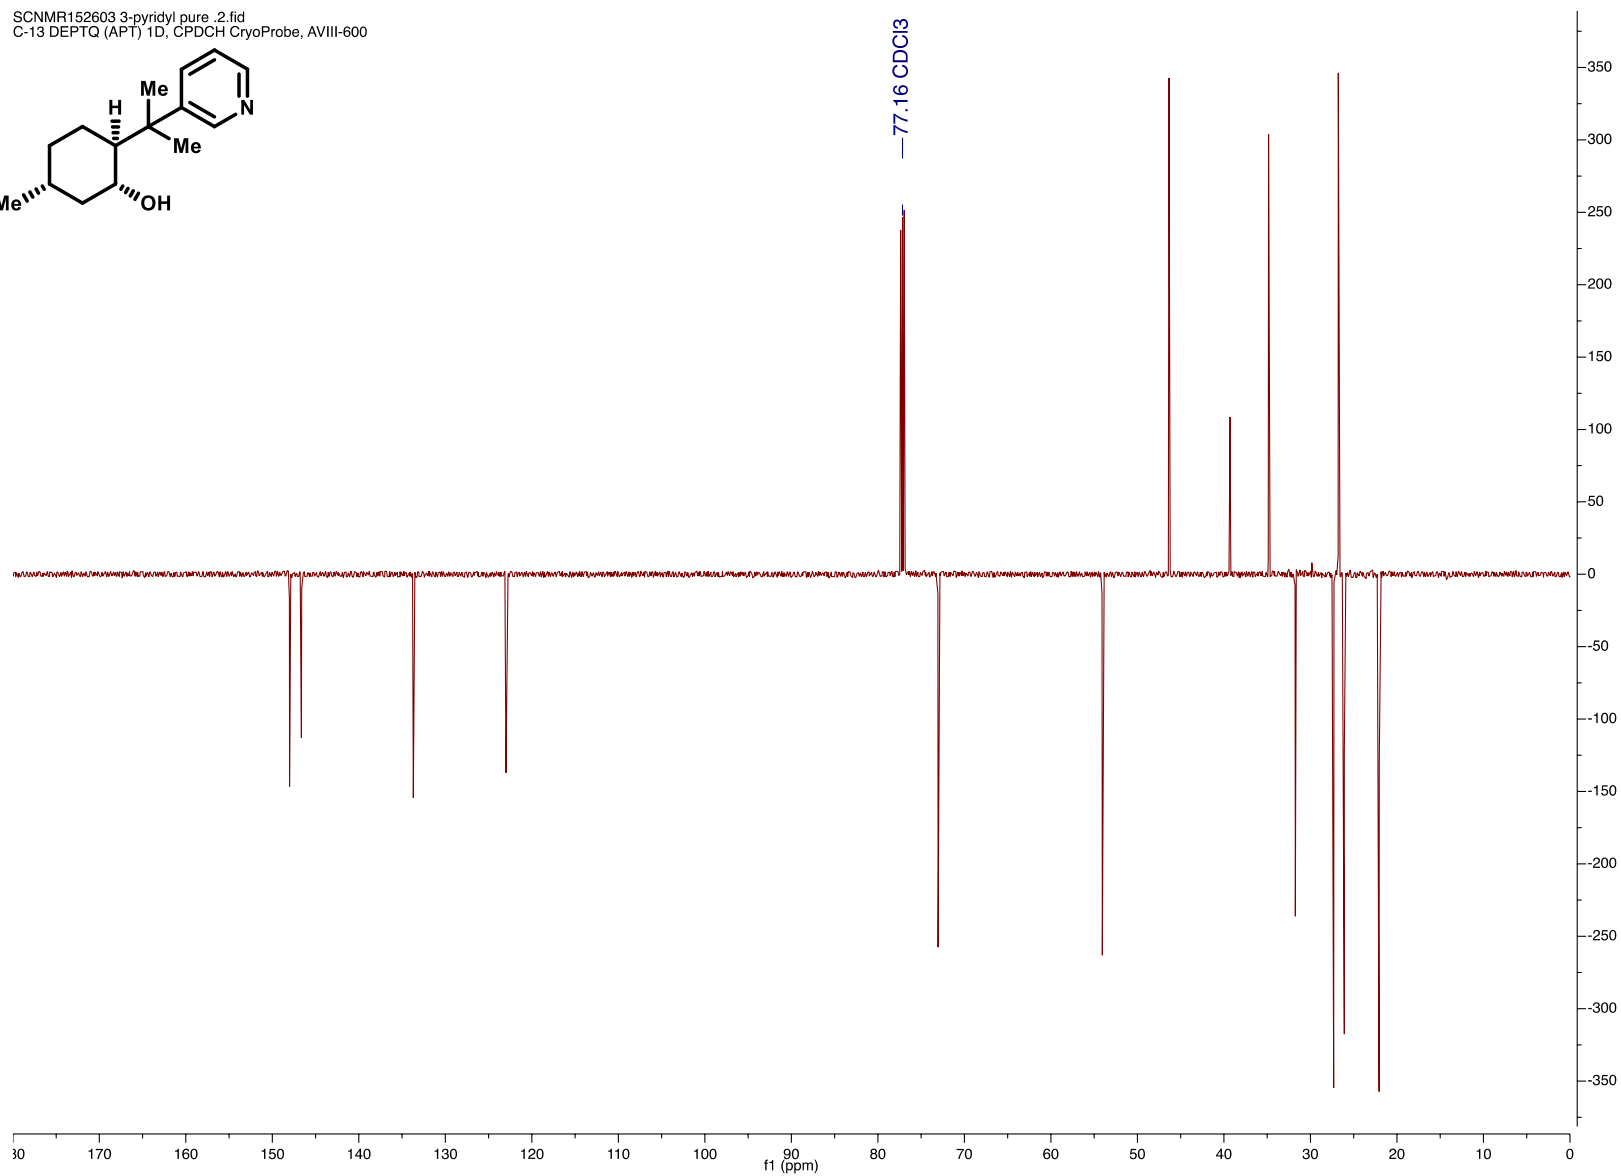

SCNMR152603 3-pyridyl pure.2.fid  
C-13 DEPTQ (APT) 1D, CPDCH CryoProbe, AVIII-600

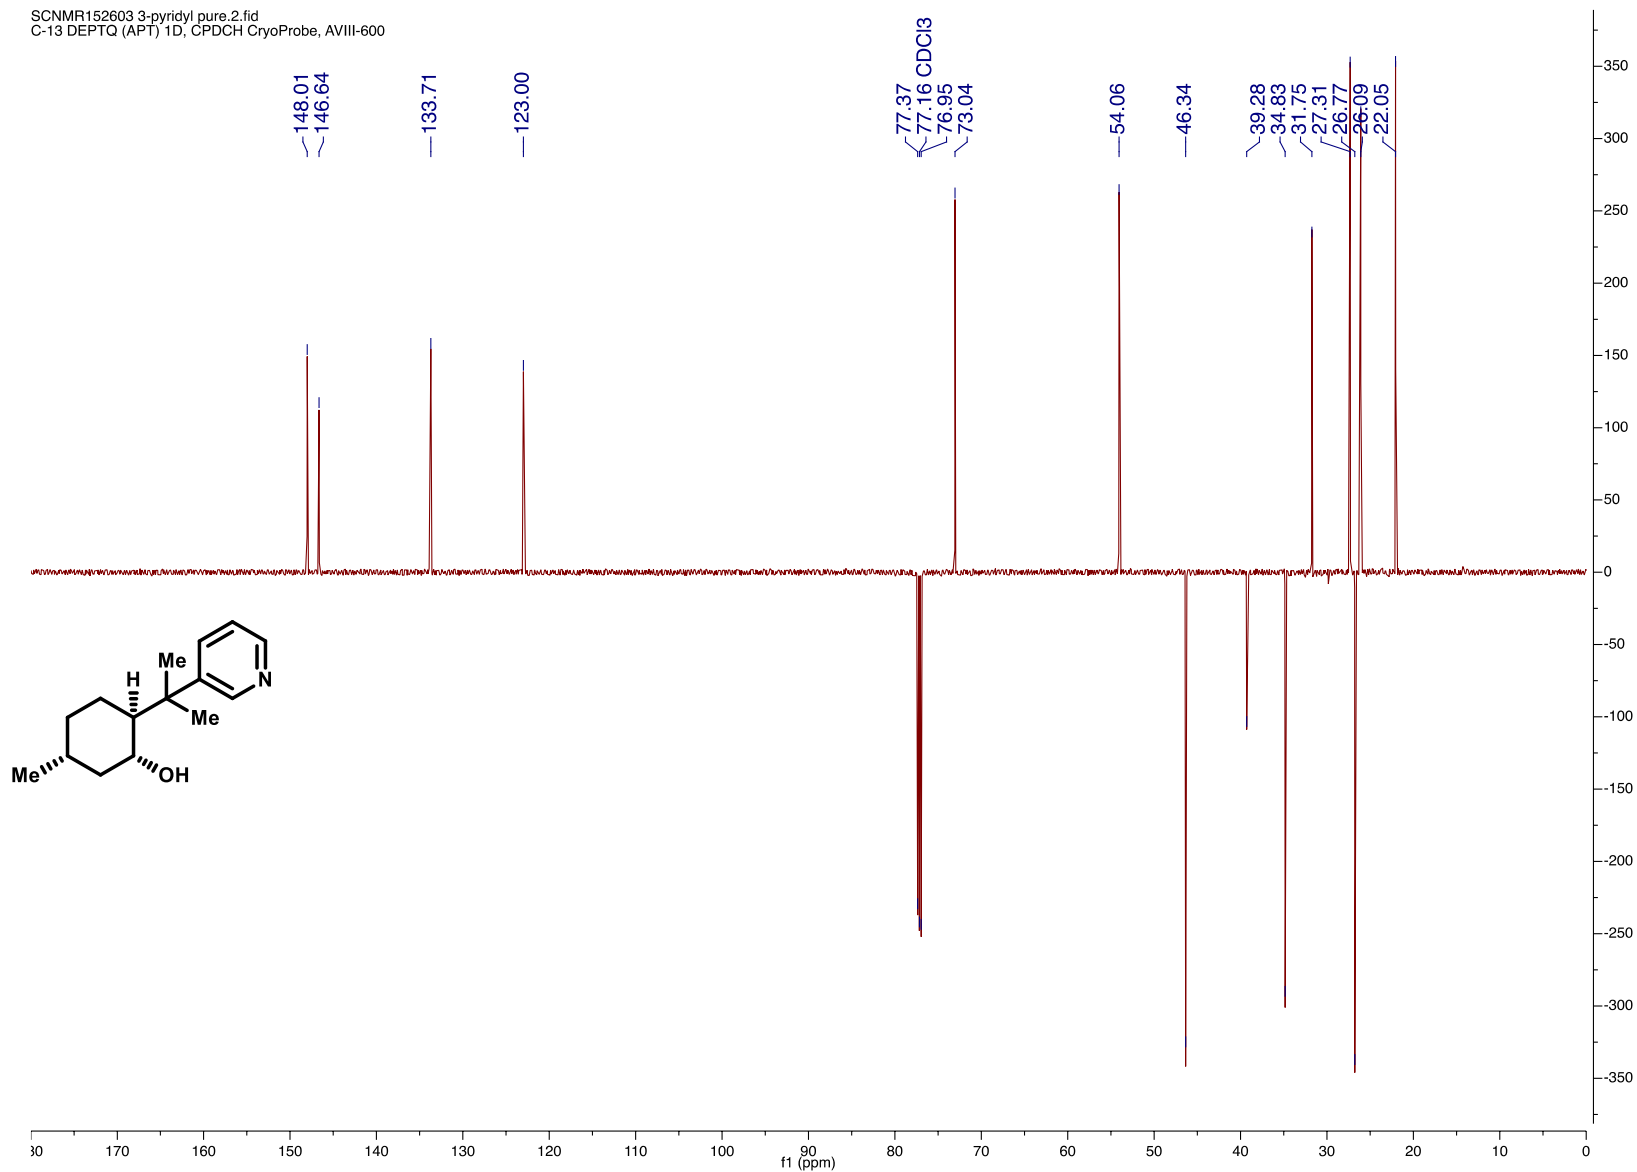

11:  $^1\text{H-NMR}$ ,  $\text{C}_6\text{D}_6$

SCNMR152605.1.fid  
H-1 Routine, CP-DCH, AVIII HD-600

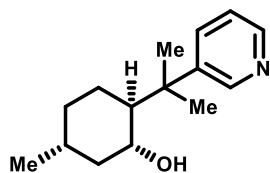

— 7.16 C6D6

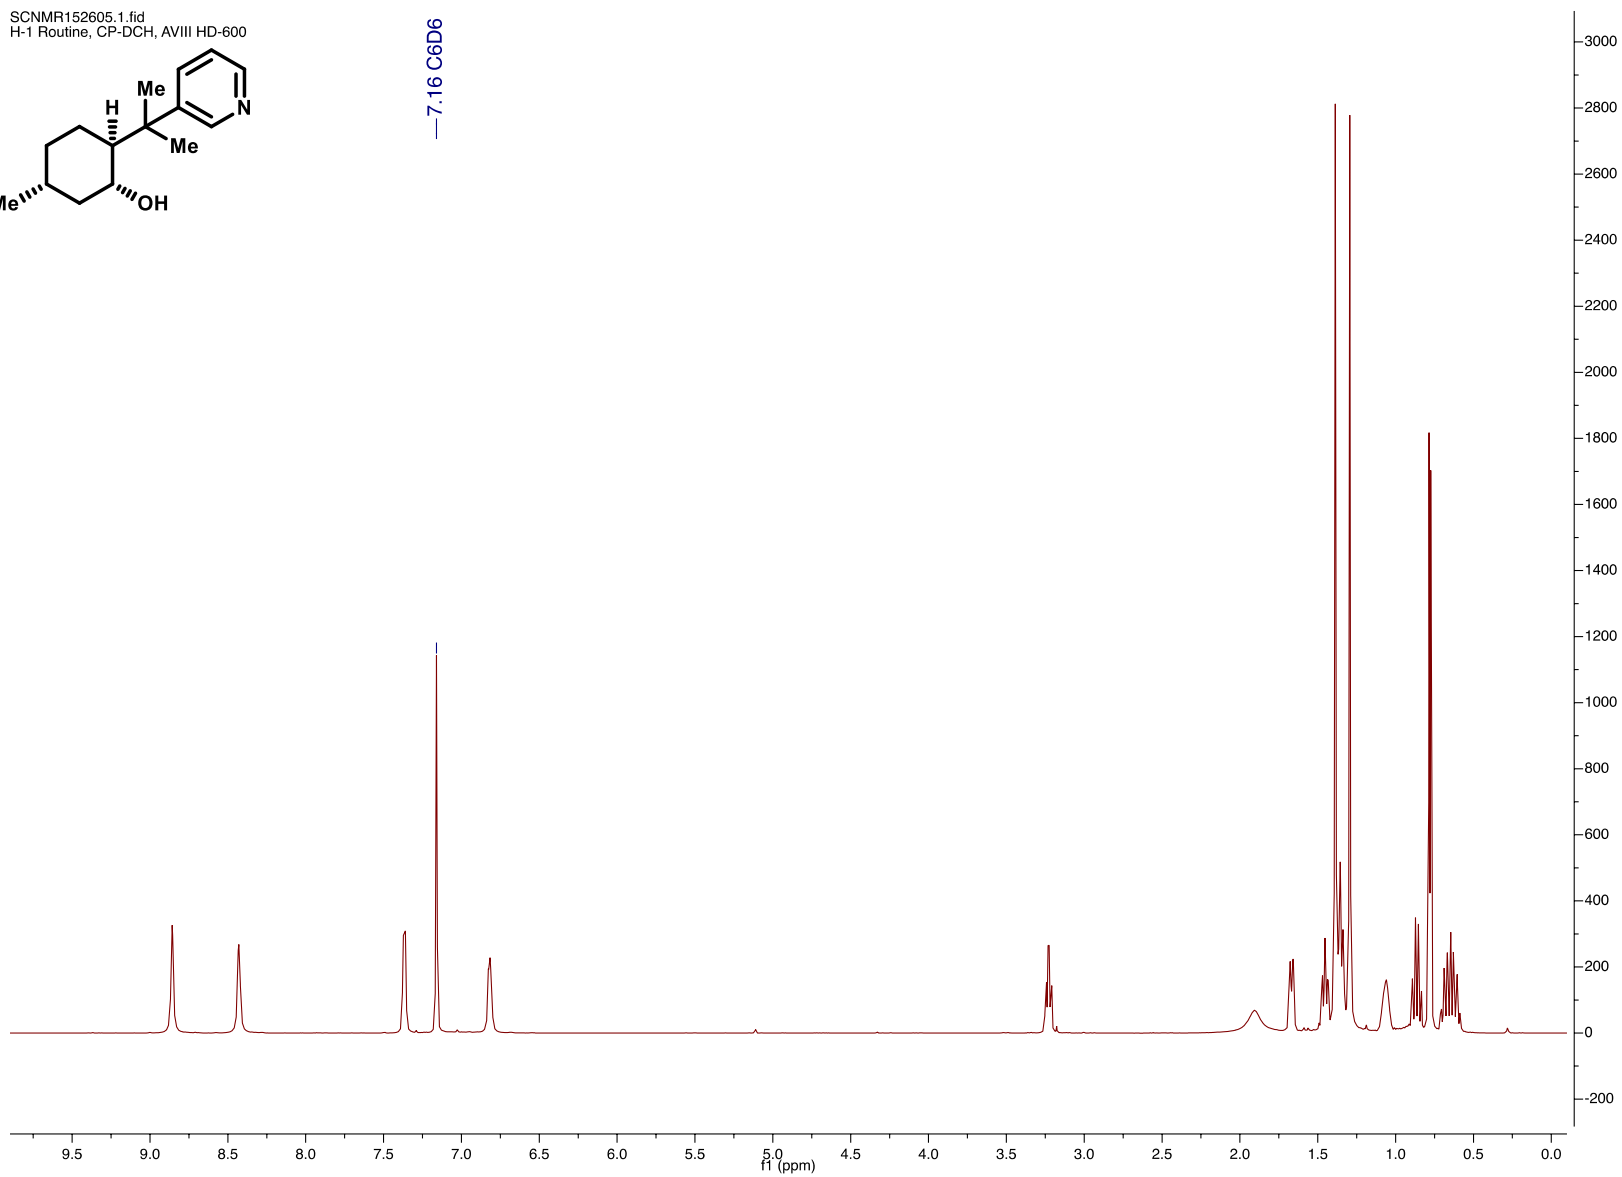

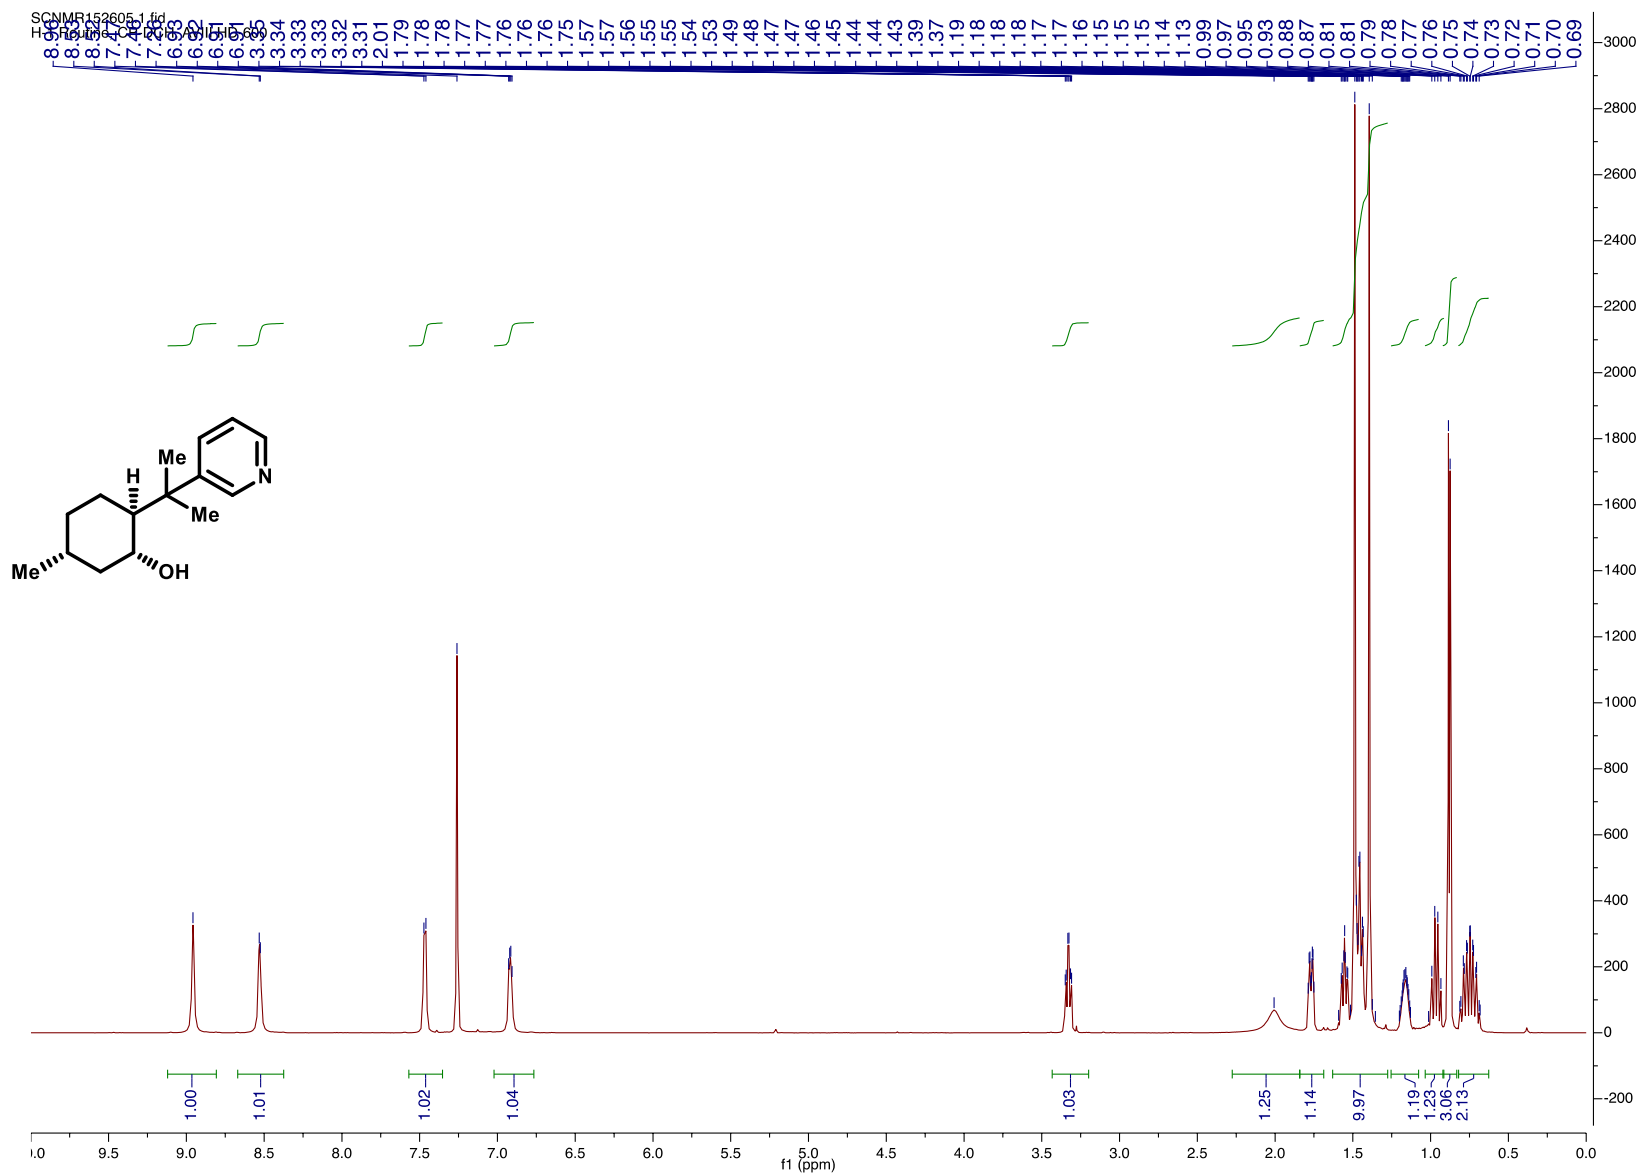

11:  $^{13}\text{C}$ -NMR,  $\text{C}_6\text{D}_6$

SCNMR152605.2.fid  
C-13 Routine 1D, CPDCH CryoProbe, AVIII-600

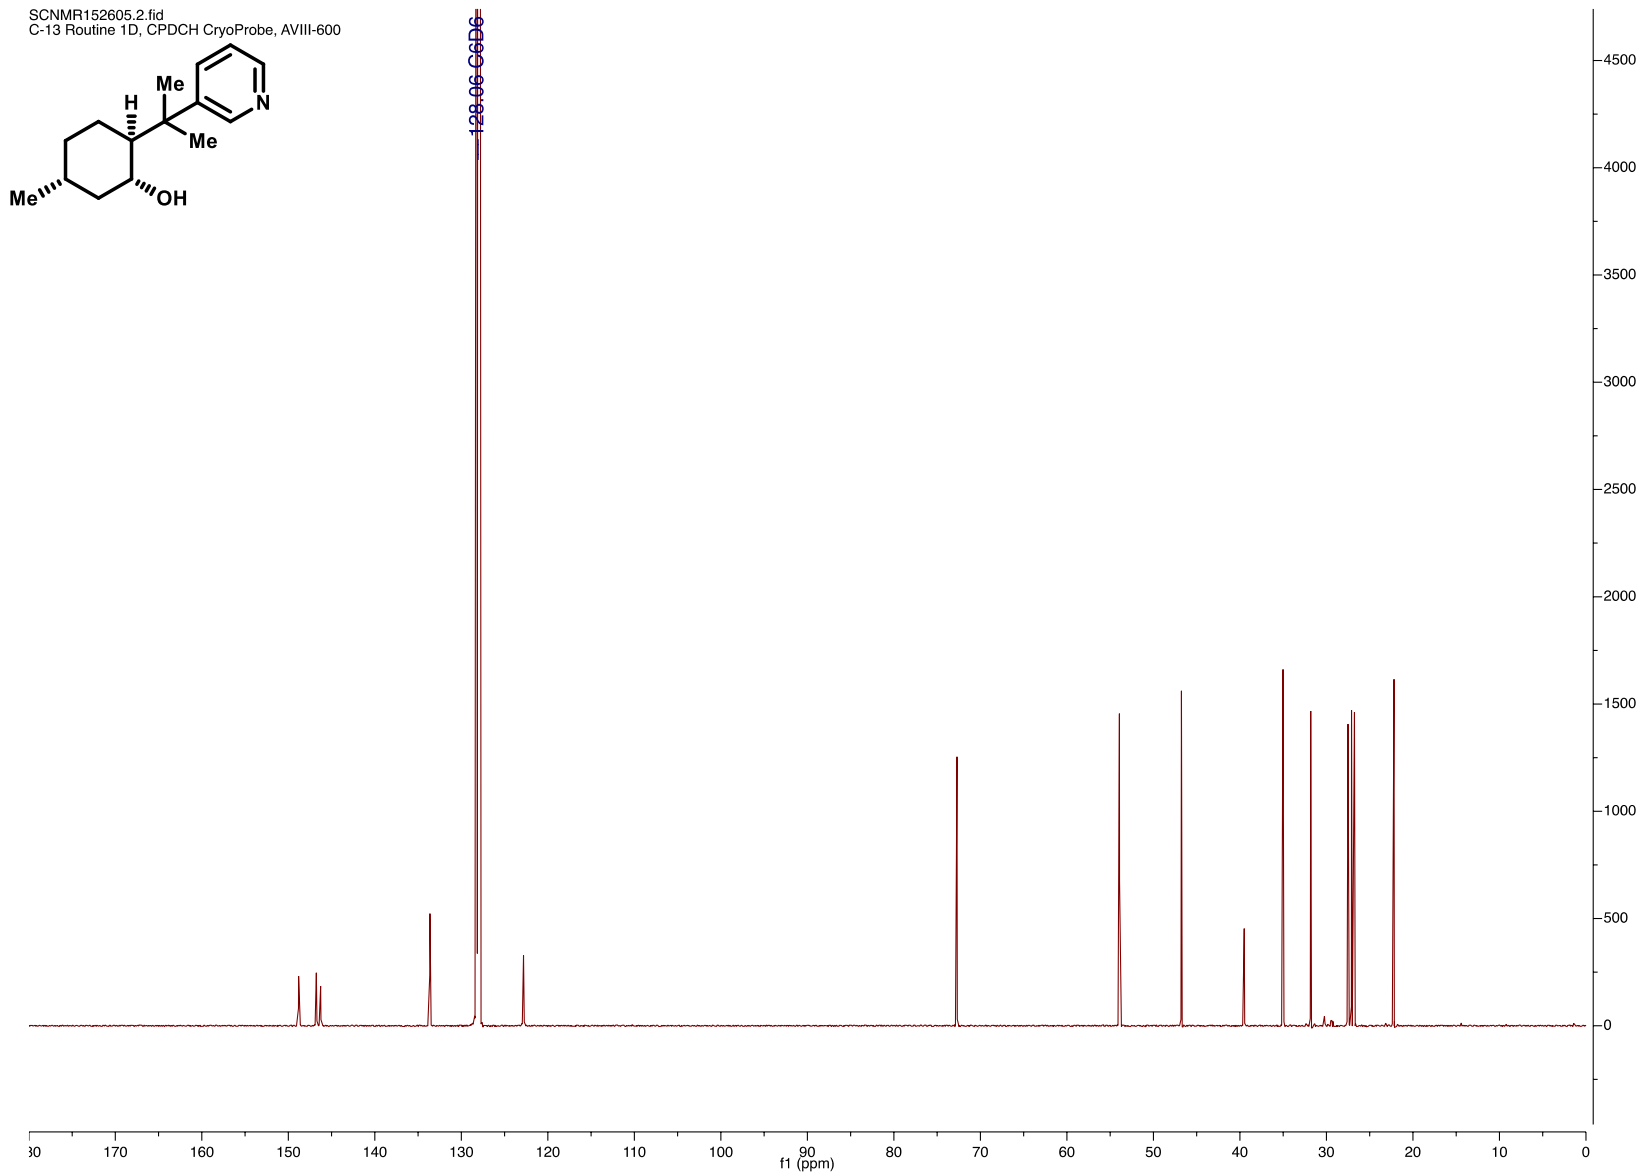

SCNMR152605.2.fid  
C-13 Routine 1D, CPDCH CryoProbe, AVIII-600

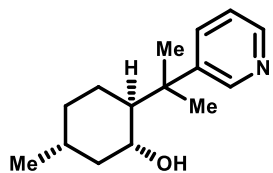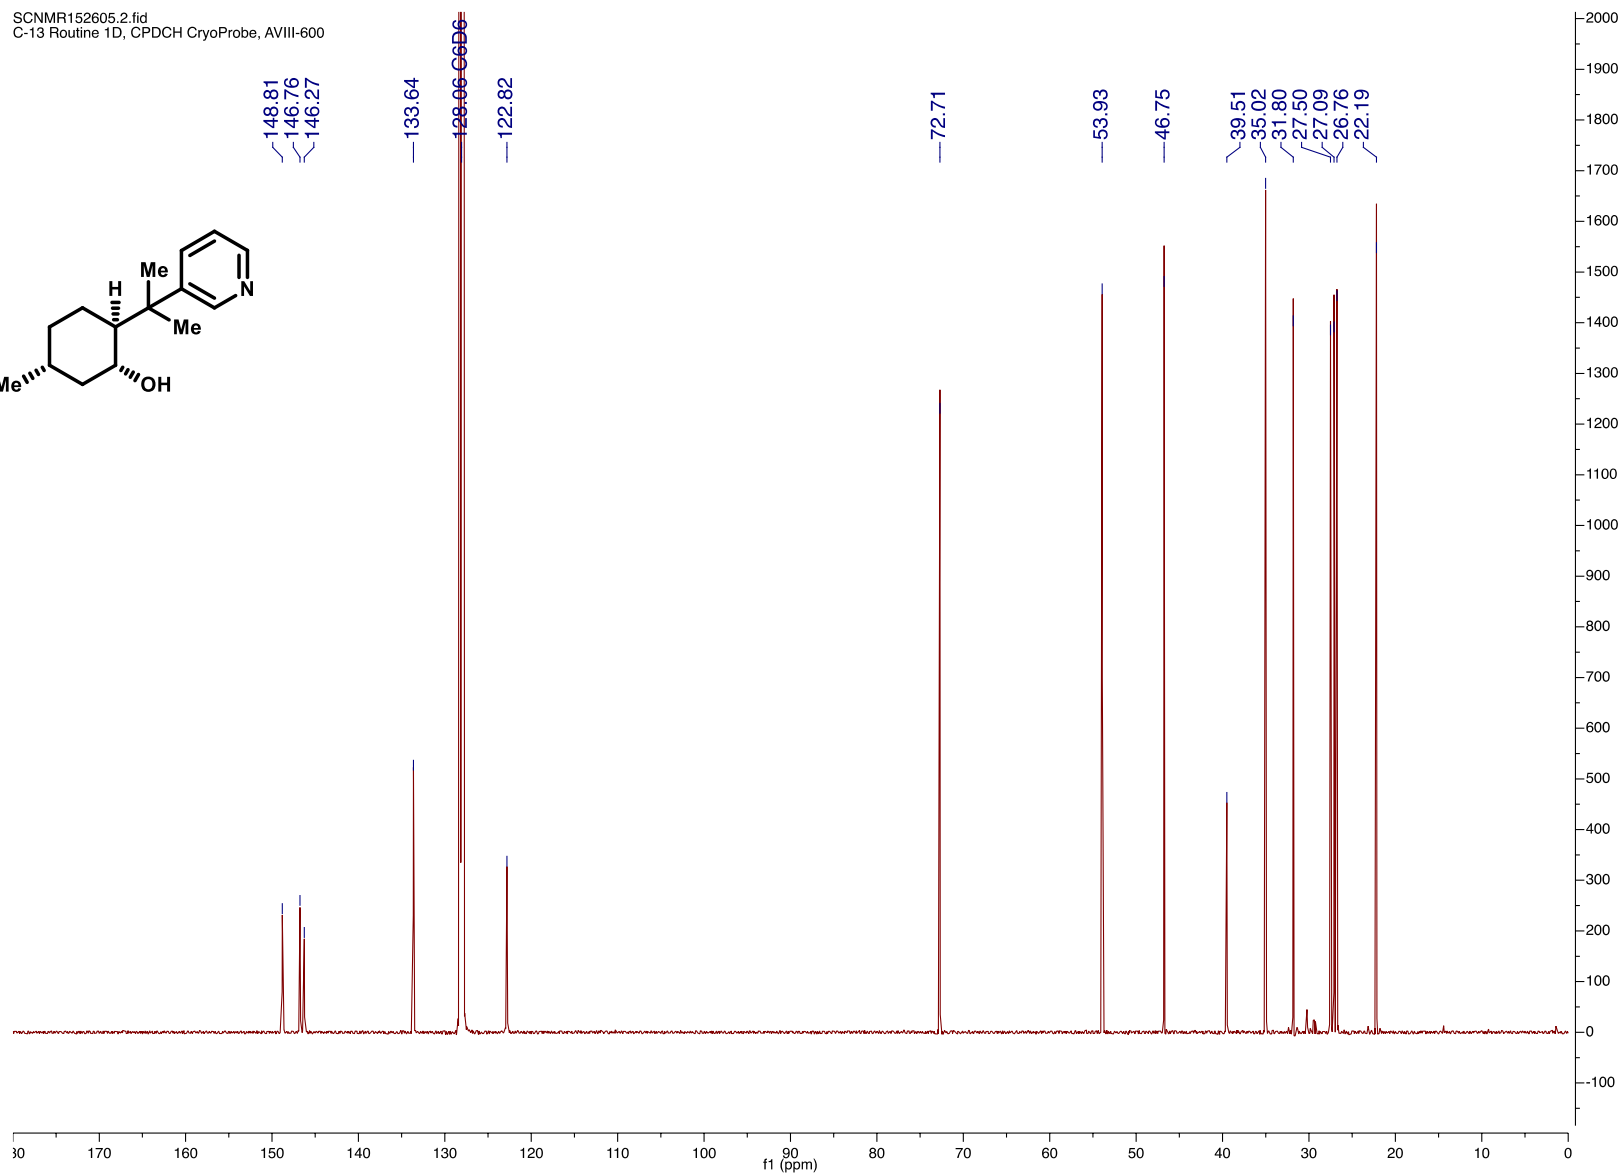

SI-14: <sup>1</sup>H-NMR

SCNMR154901.1.fid

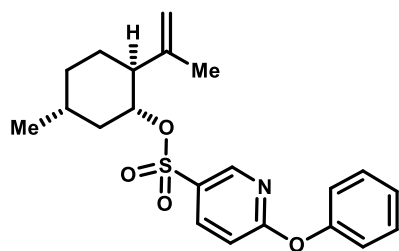

— 7.26 CDCl<sub>3</sub>

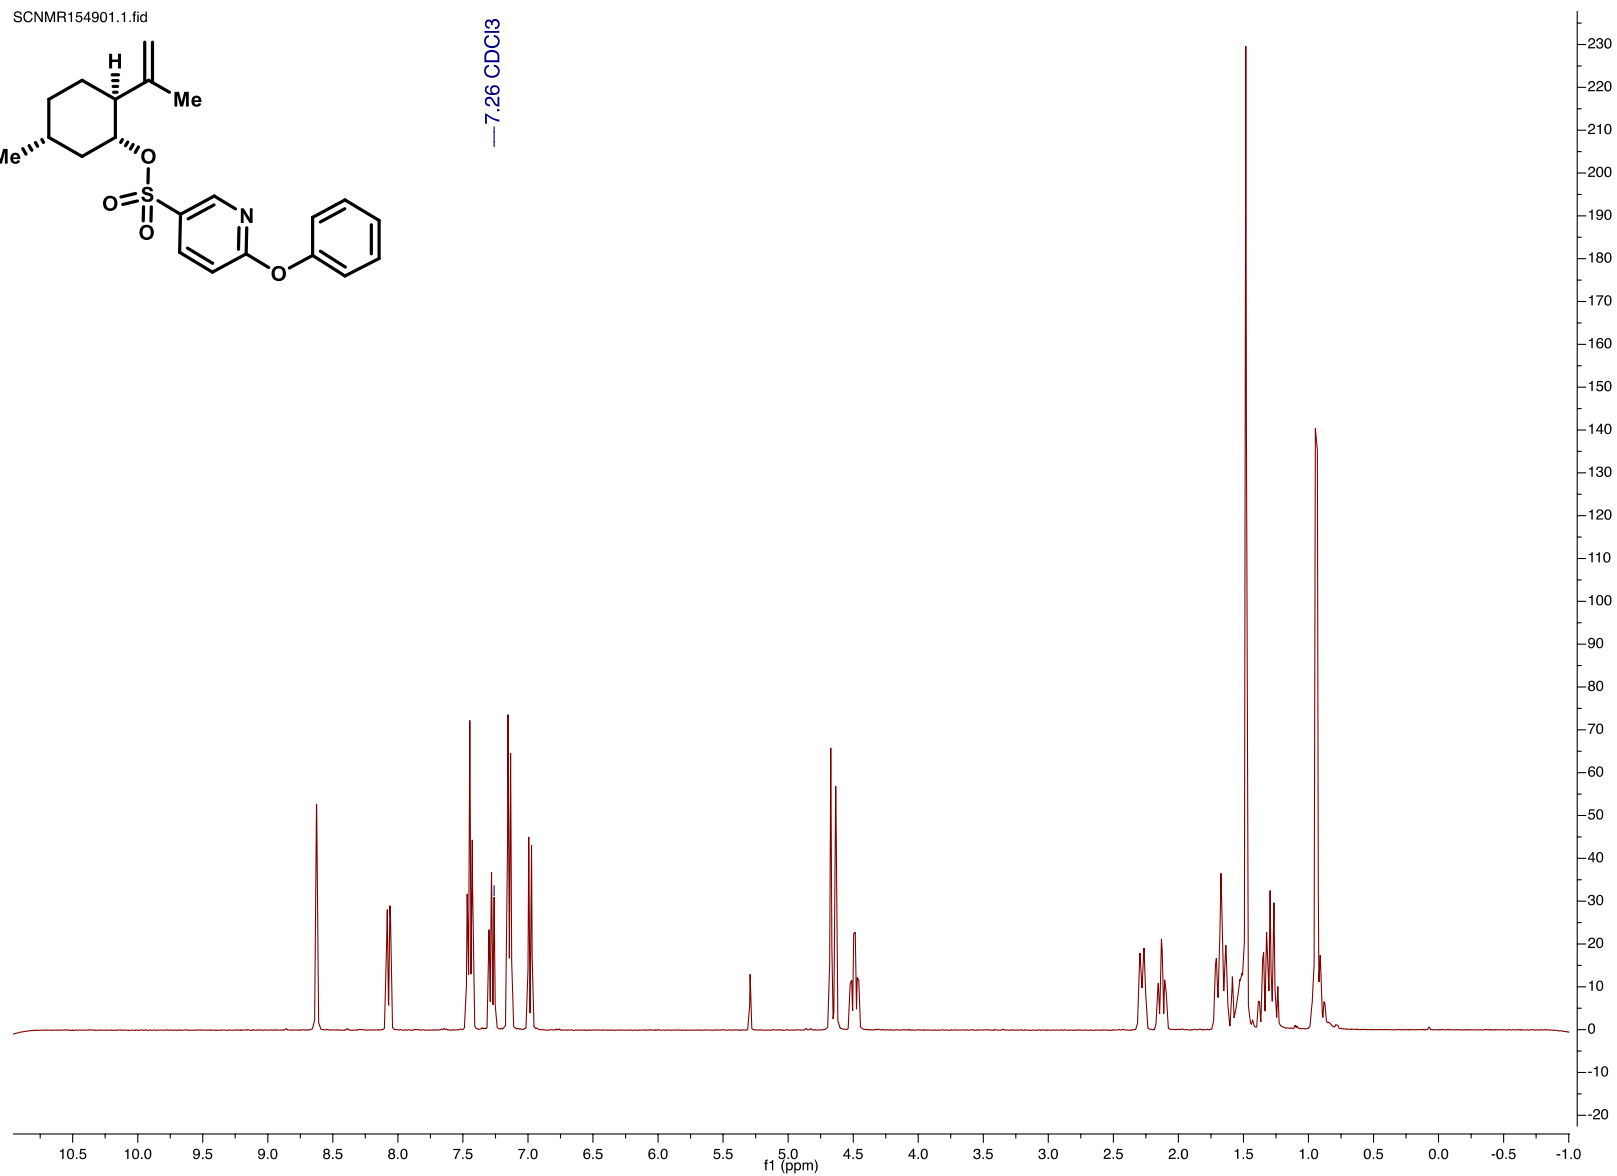

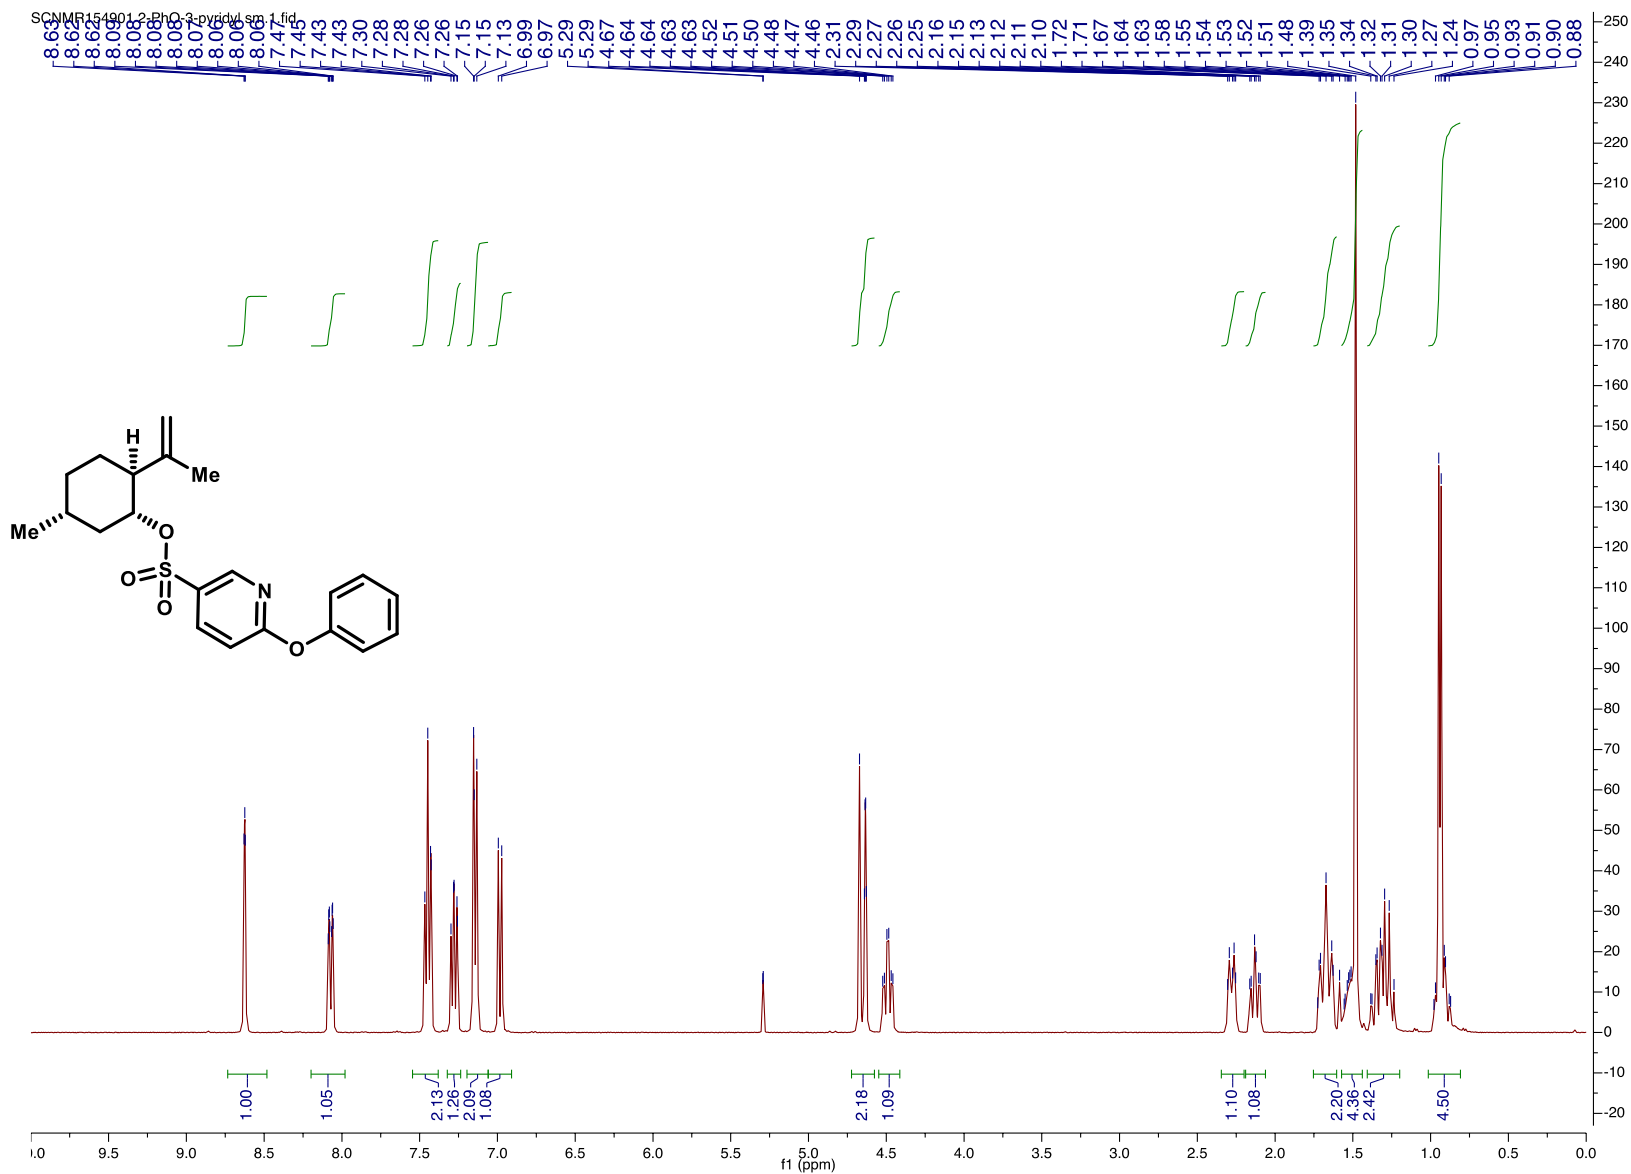



SI-14:  $^{13}\text{C}$ -NMR

SCNMR154901.2.fid  
C-13 Routine, using 45 degree flip angle. DPX-400

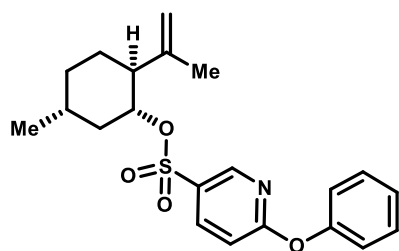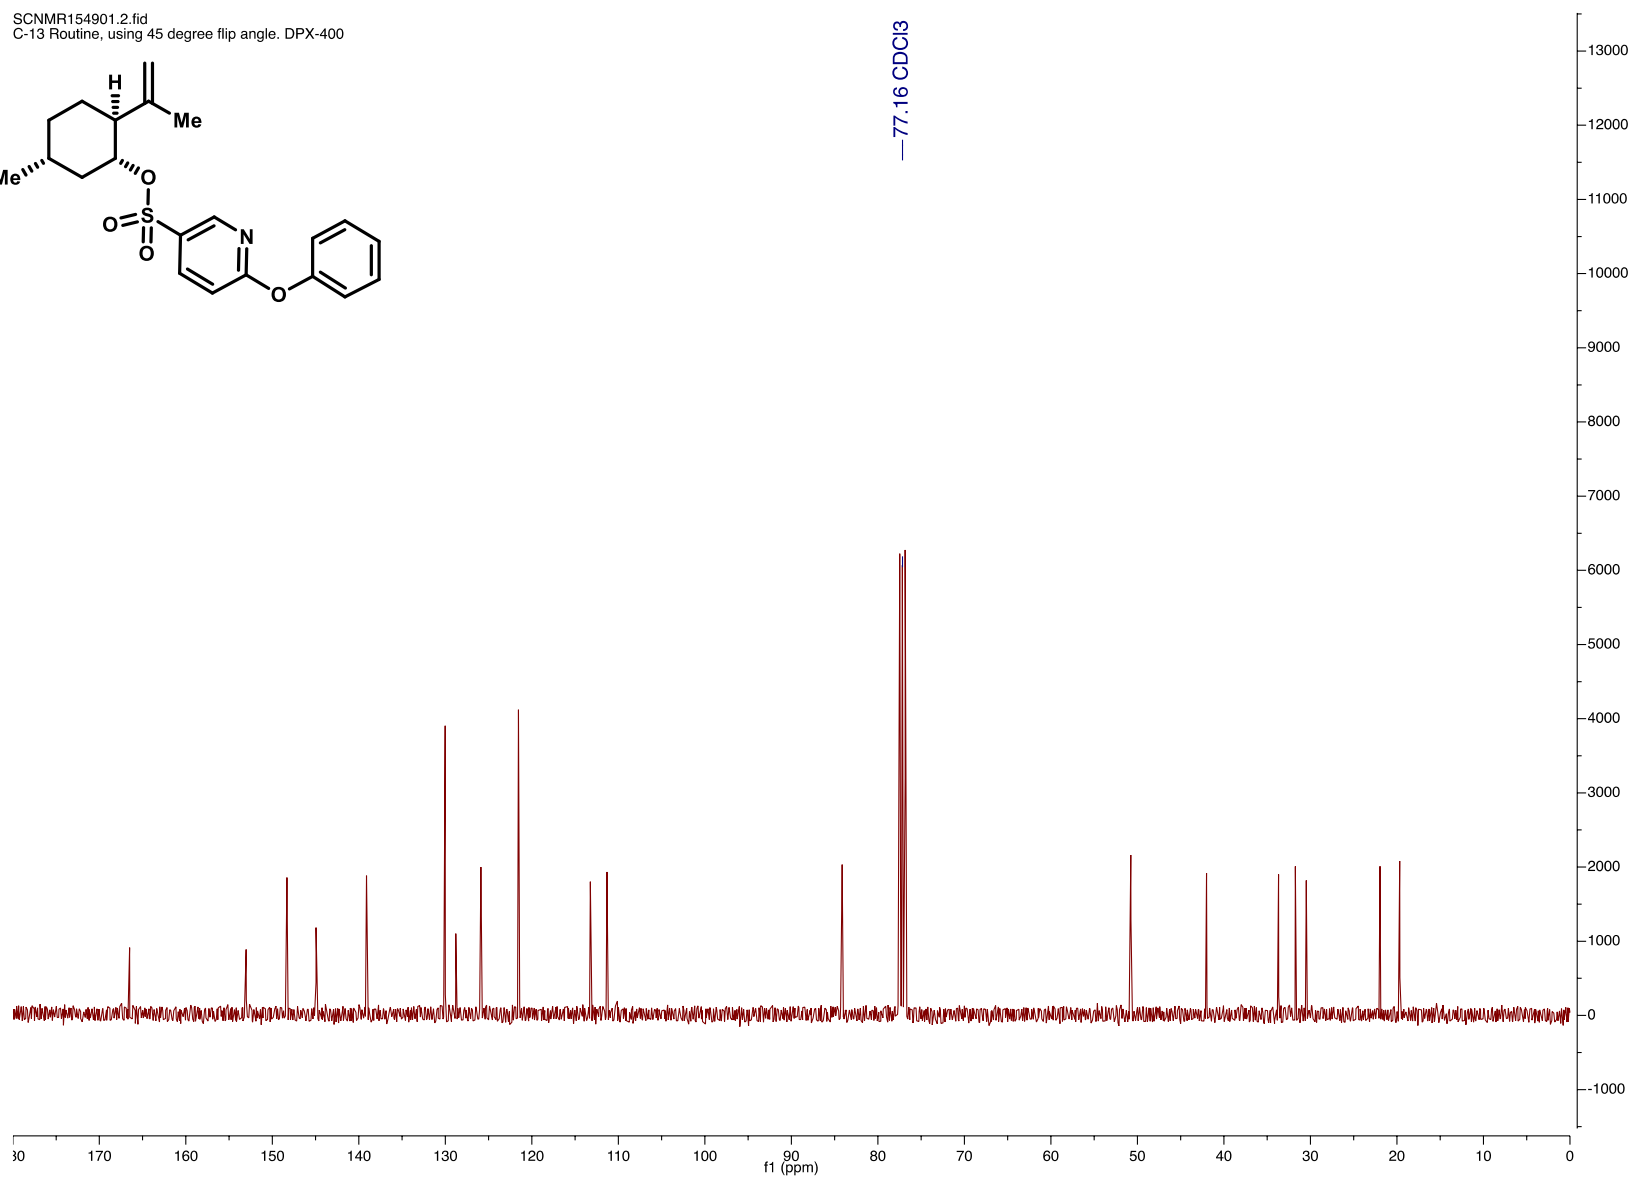

SCNMR154901 2-PhO-3-pyridyl sm.2.fid  
C-13 Routine, using 45 degree flip angle. DPX-400

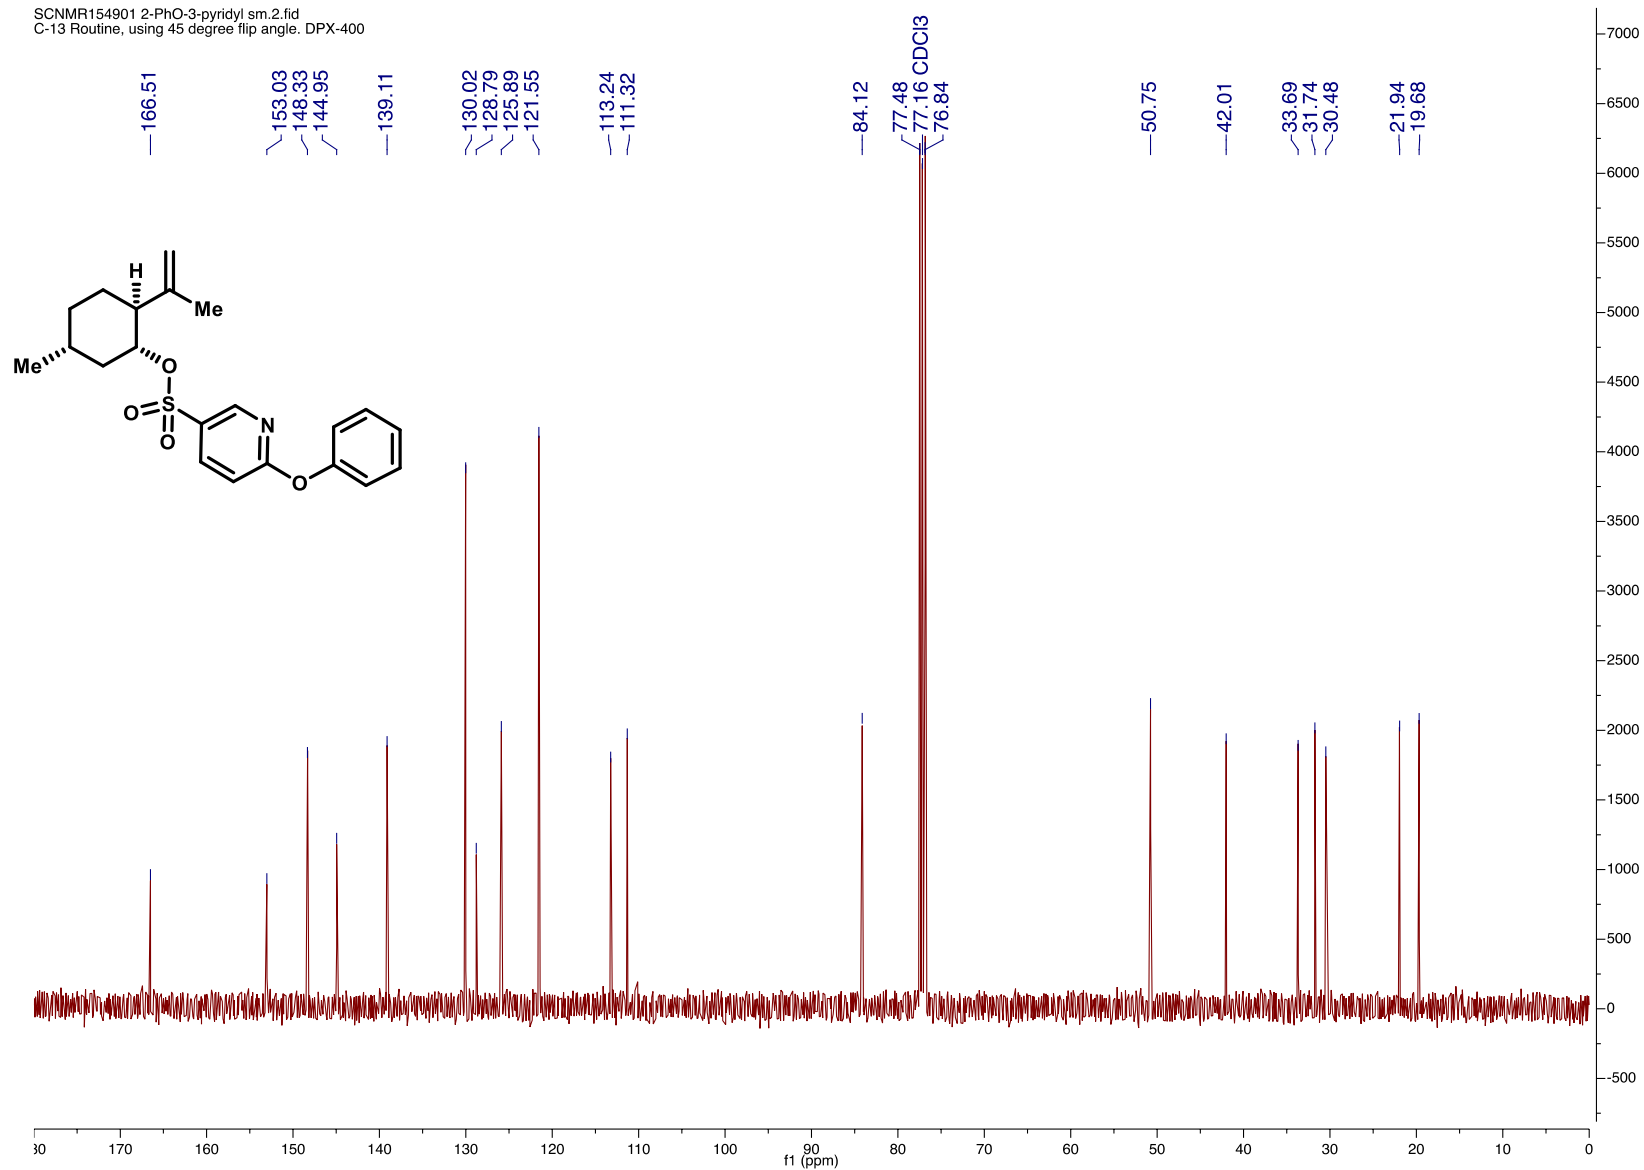

12: <sup>1</sup>H-NMR

SCNMR124103.1.fid  
H-1 Routine, CP-DCH, AVIII HD-600

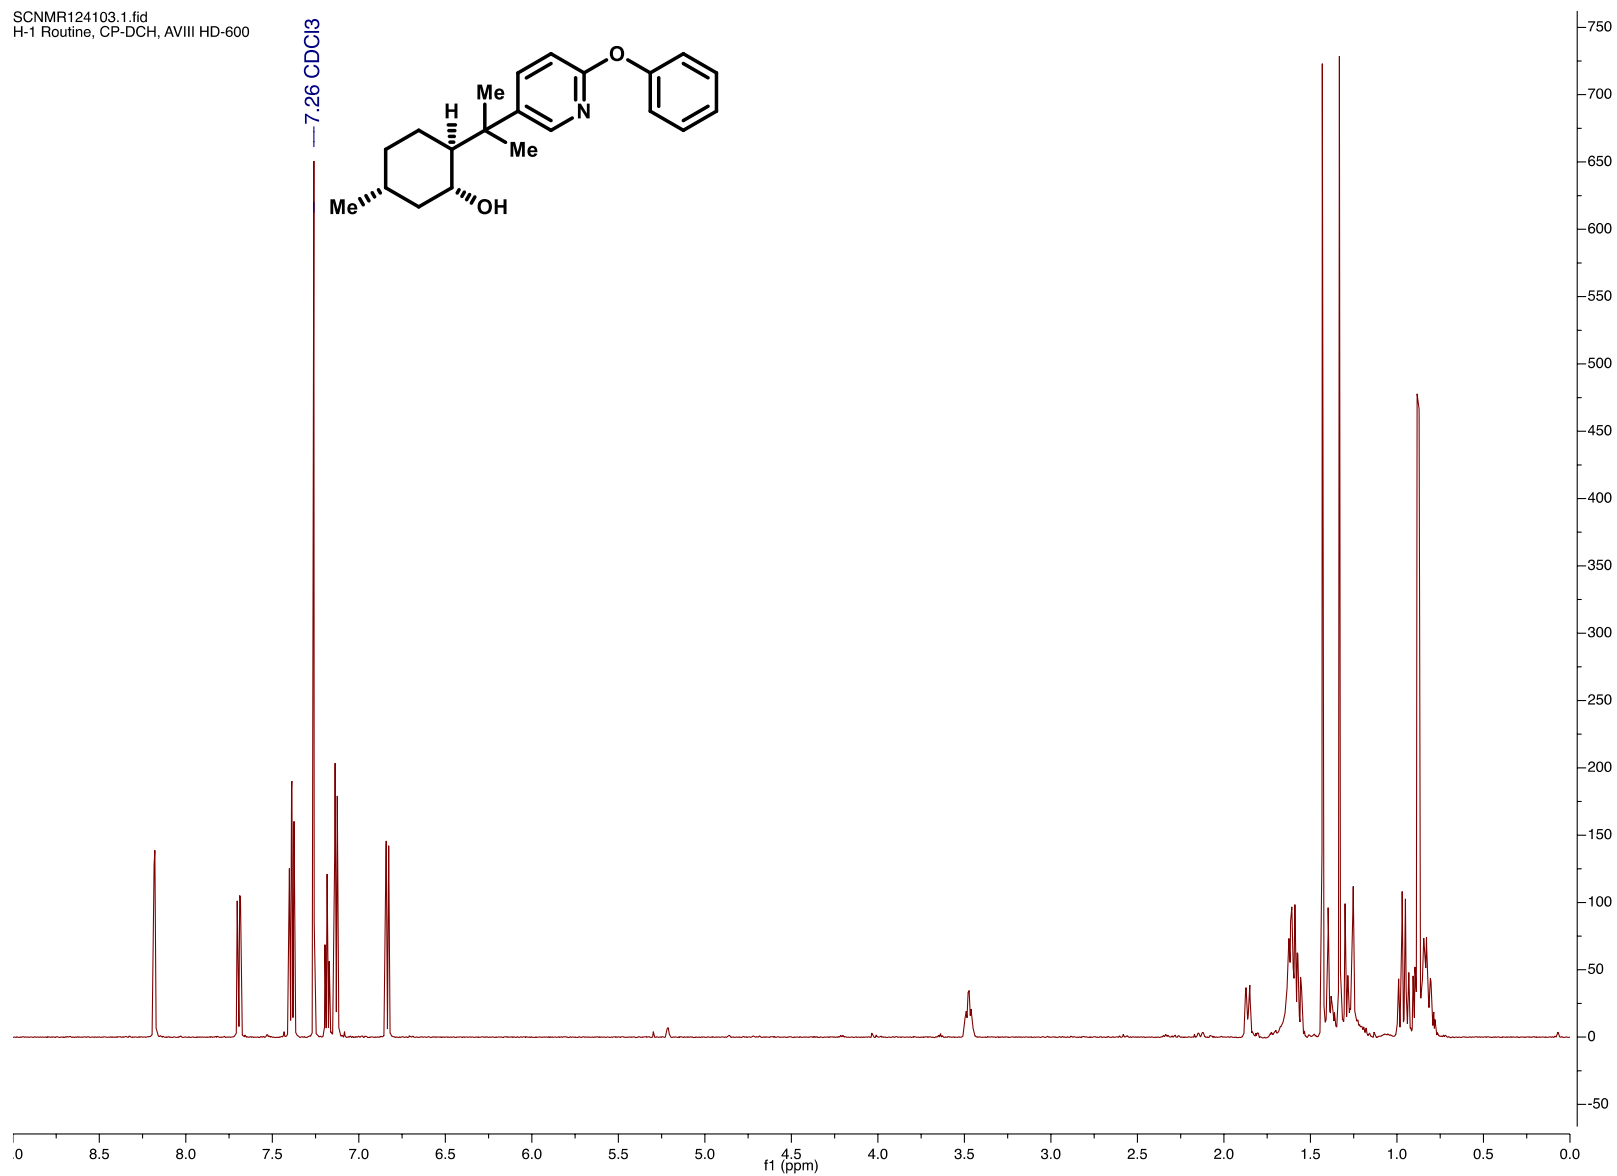

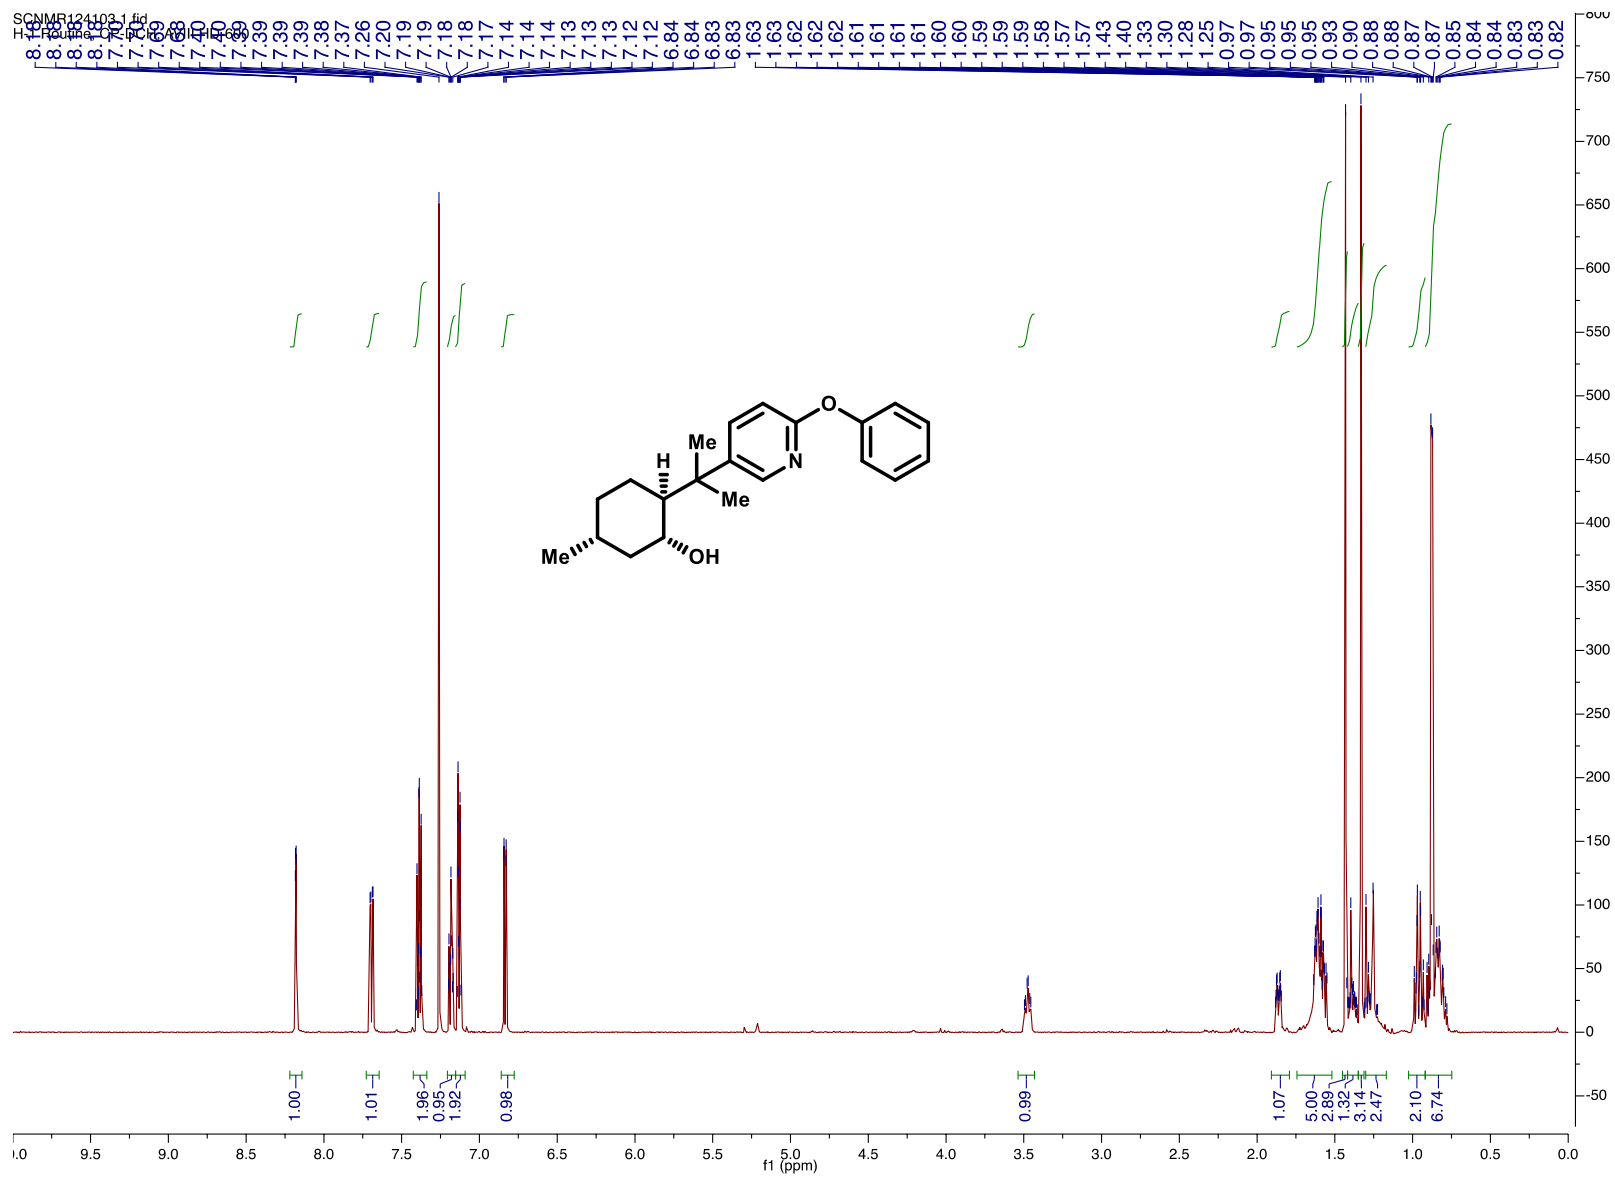

## 12: $^{13}\text{C}$ -NMR

SCNMR124103.2.fid  
C-13 Routine 1D, CPDCH CryoProbe, AVIII-600

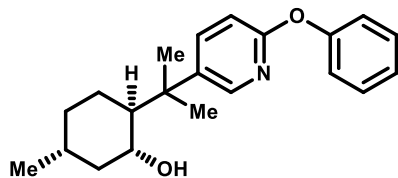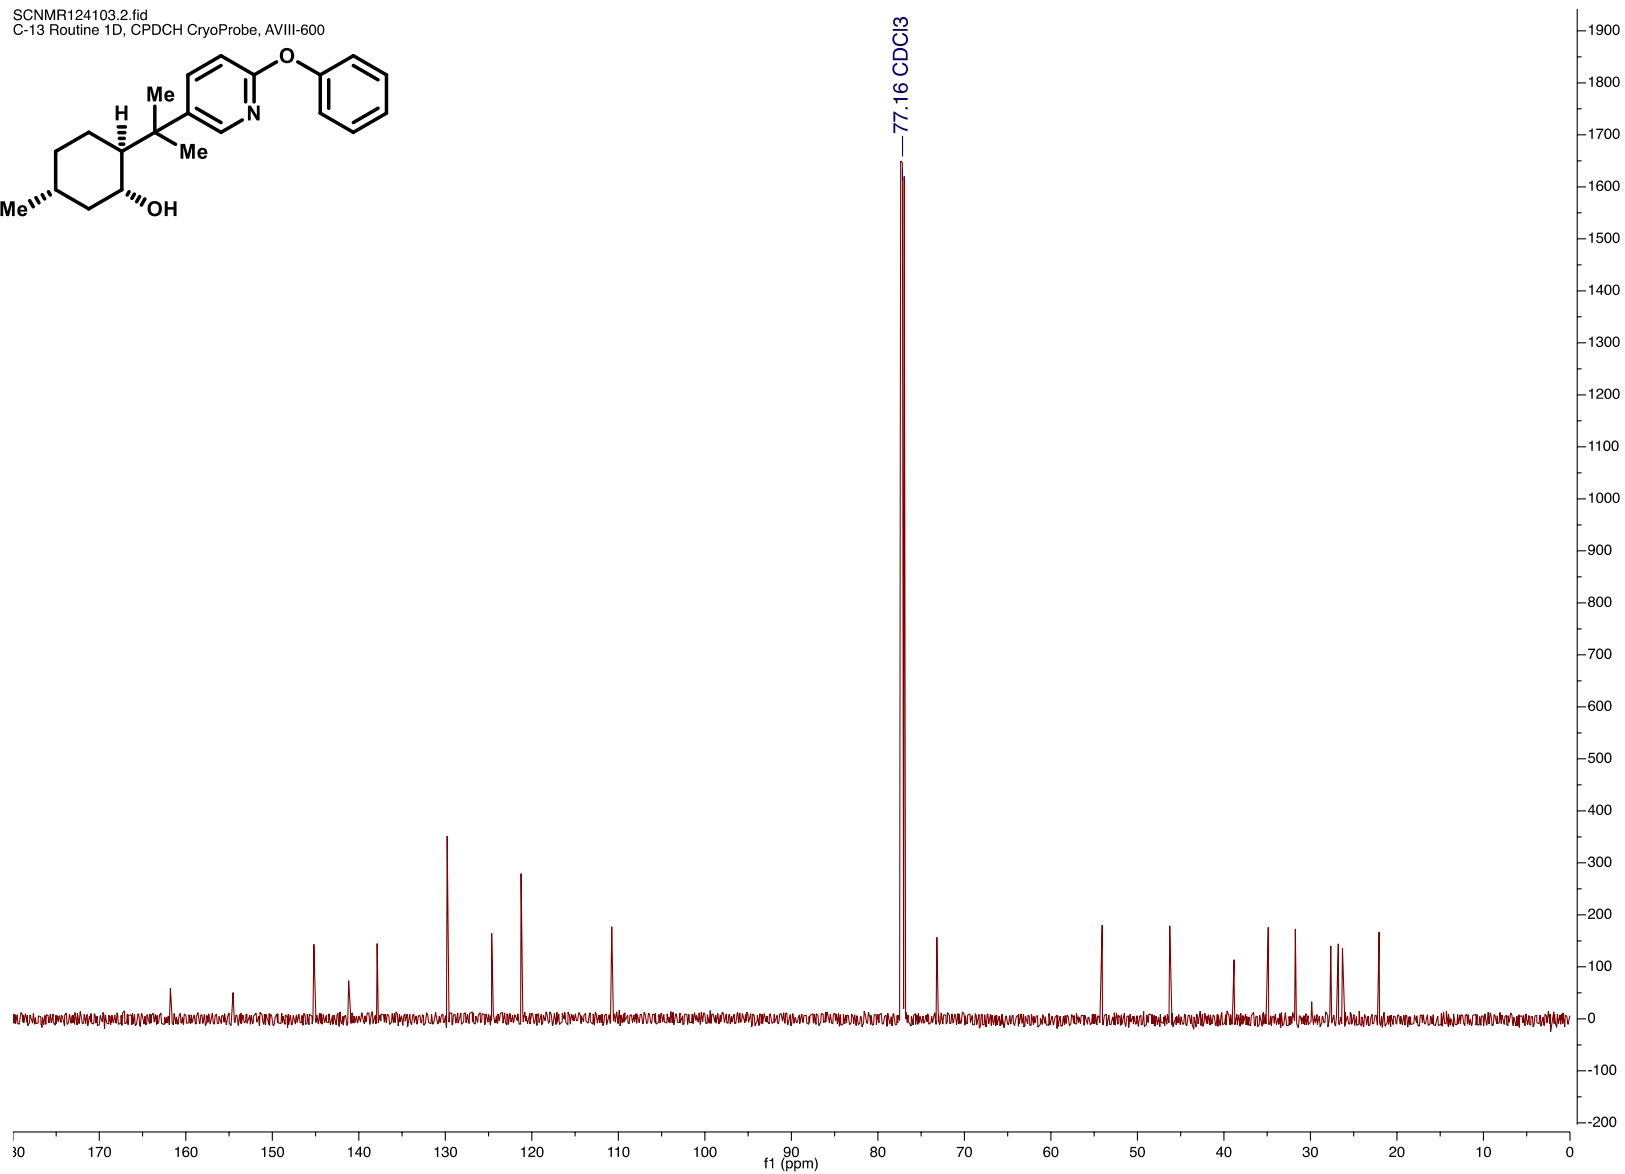

SCNMR124103.2.fid  
C-13 Routine 1D, CPDCH CryoProbe, AVIII-600

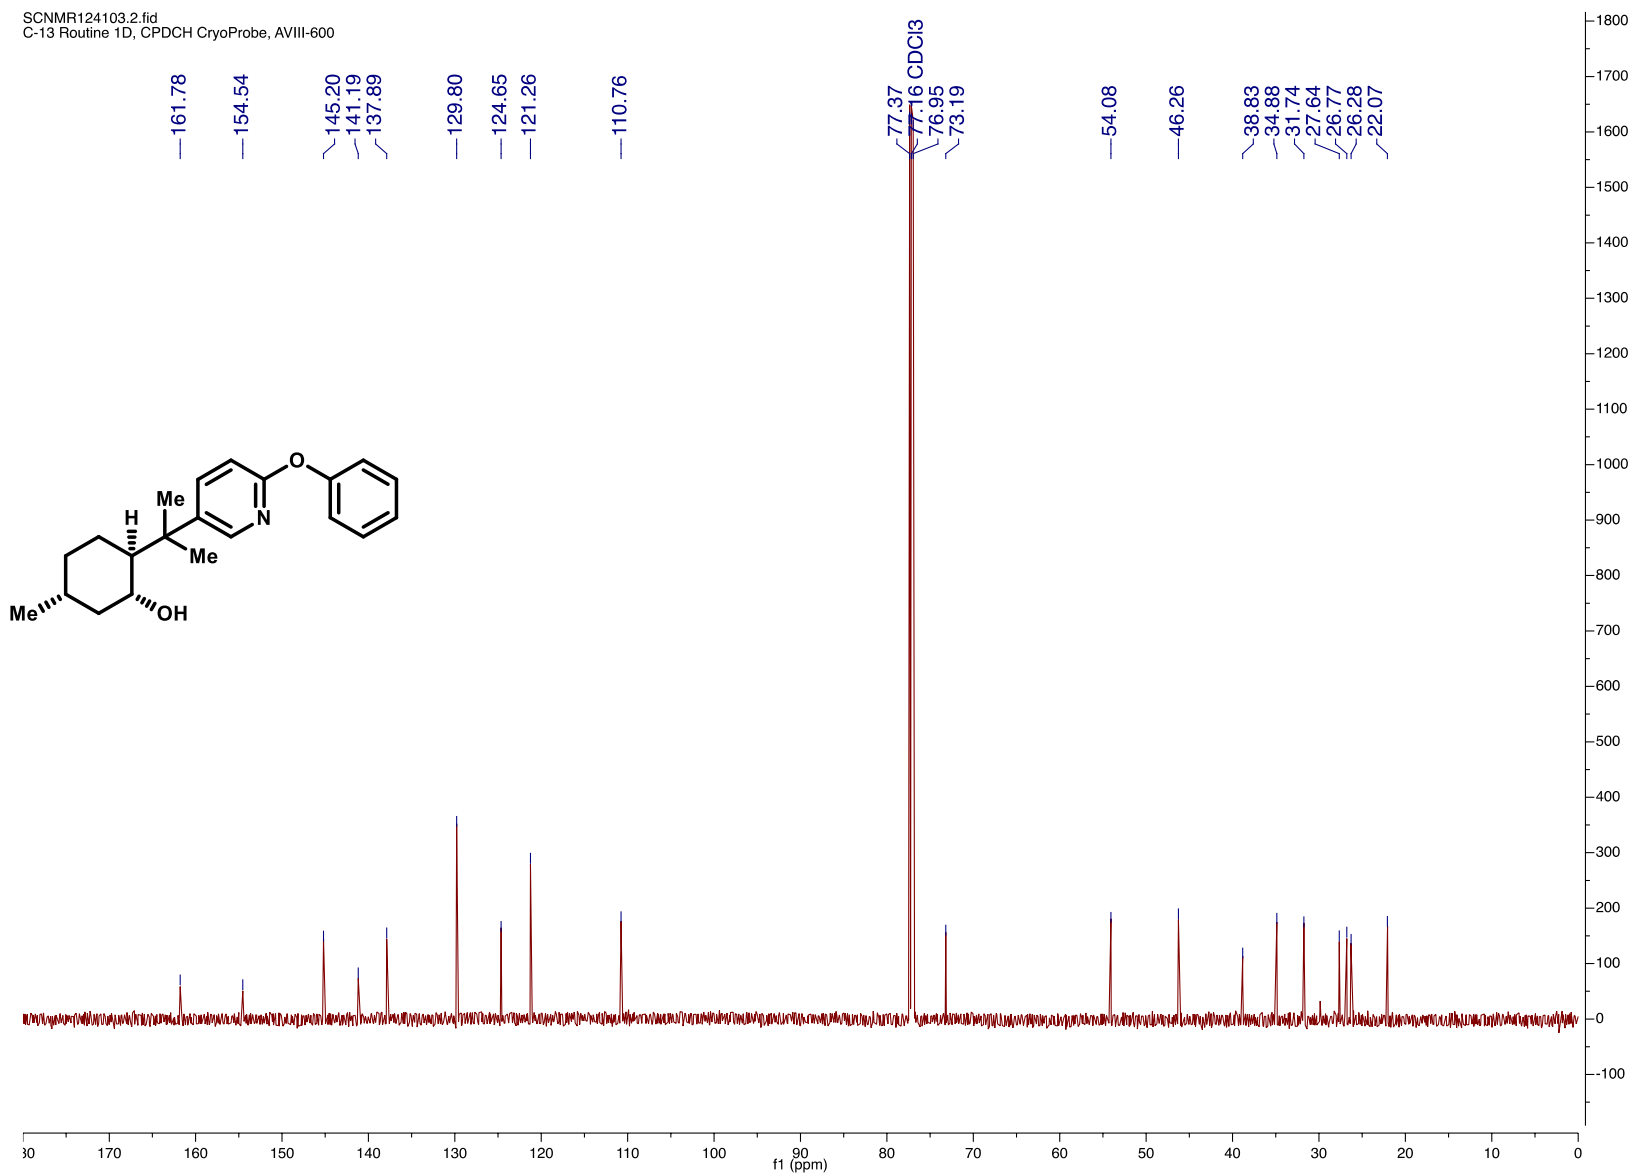

SI-15:  $^1\text{H}$ -NMR

SCNMR154101 8-quinoline sm.1.fid

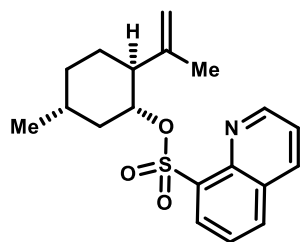

— 7.26 CDCl<sub>3</sub>

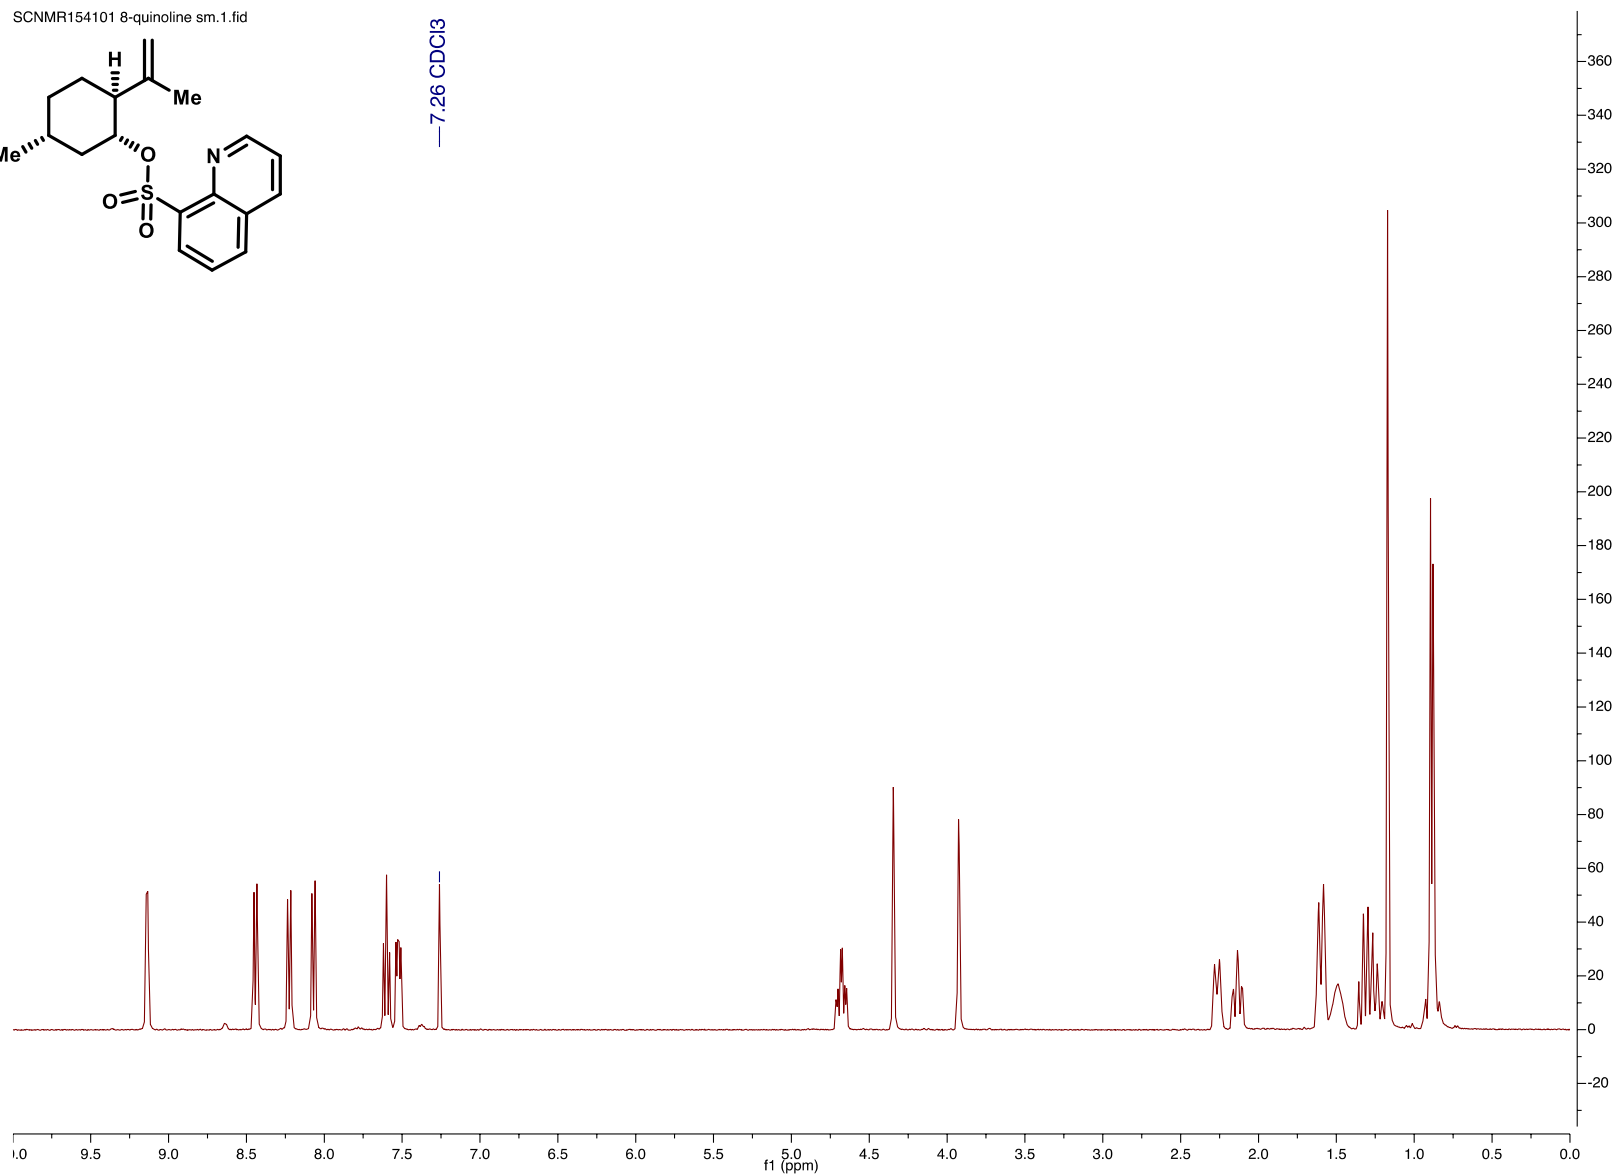

SCNMR154101\_8quinoline.sm 1.fid

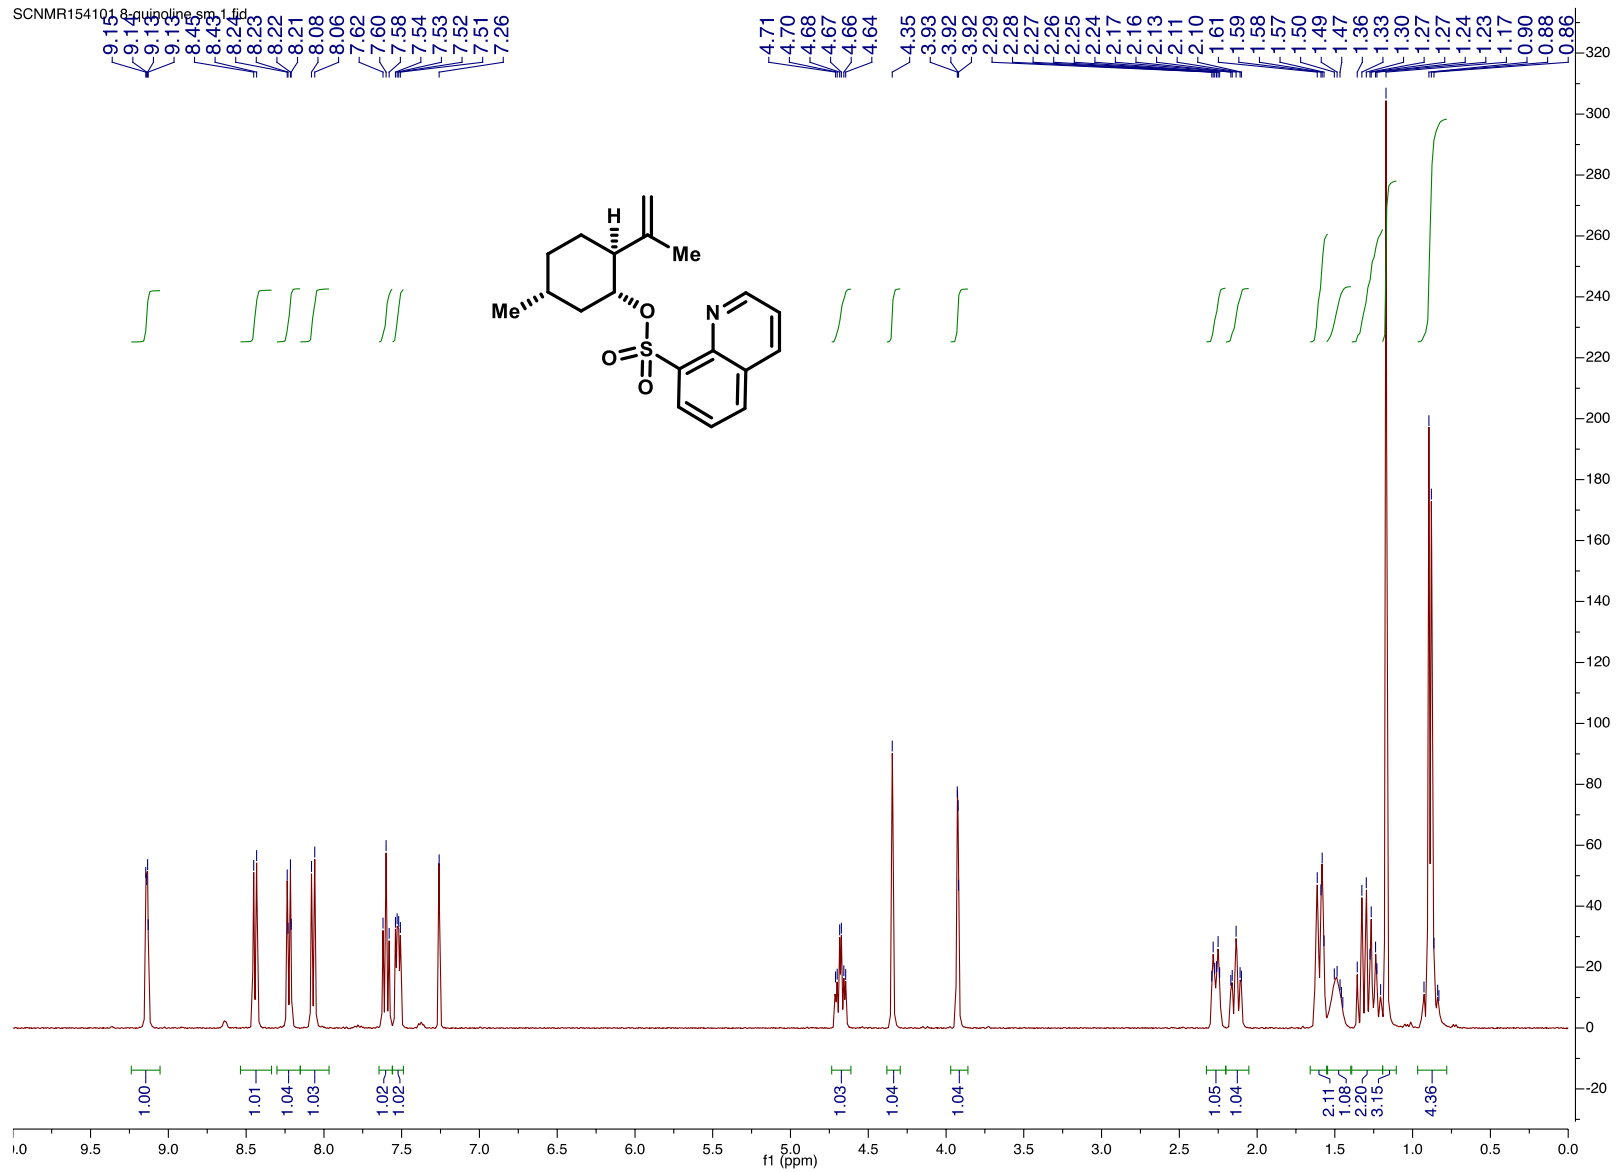



SI-15:  $^{13}\text{C}$ -NMR

SCNMR154101 8-quinoline sm.2.fid  
C-13 Routine, using 45 degree flip angle. DPX-400

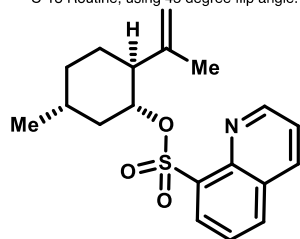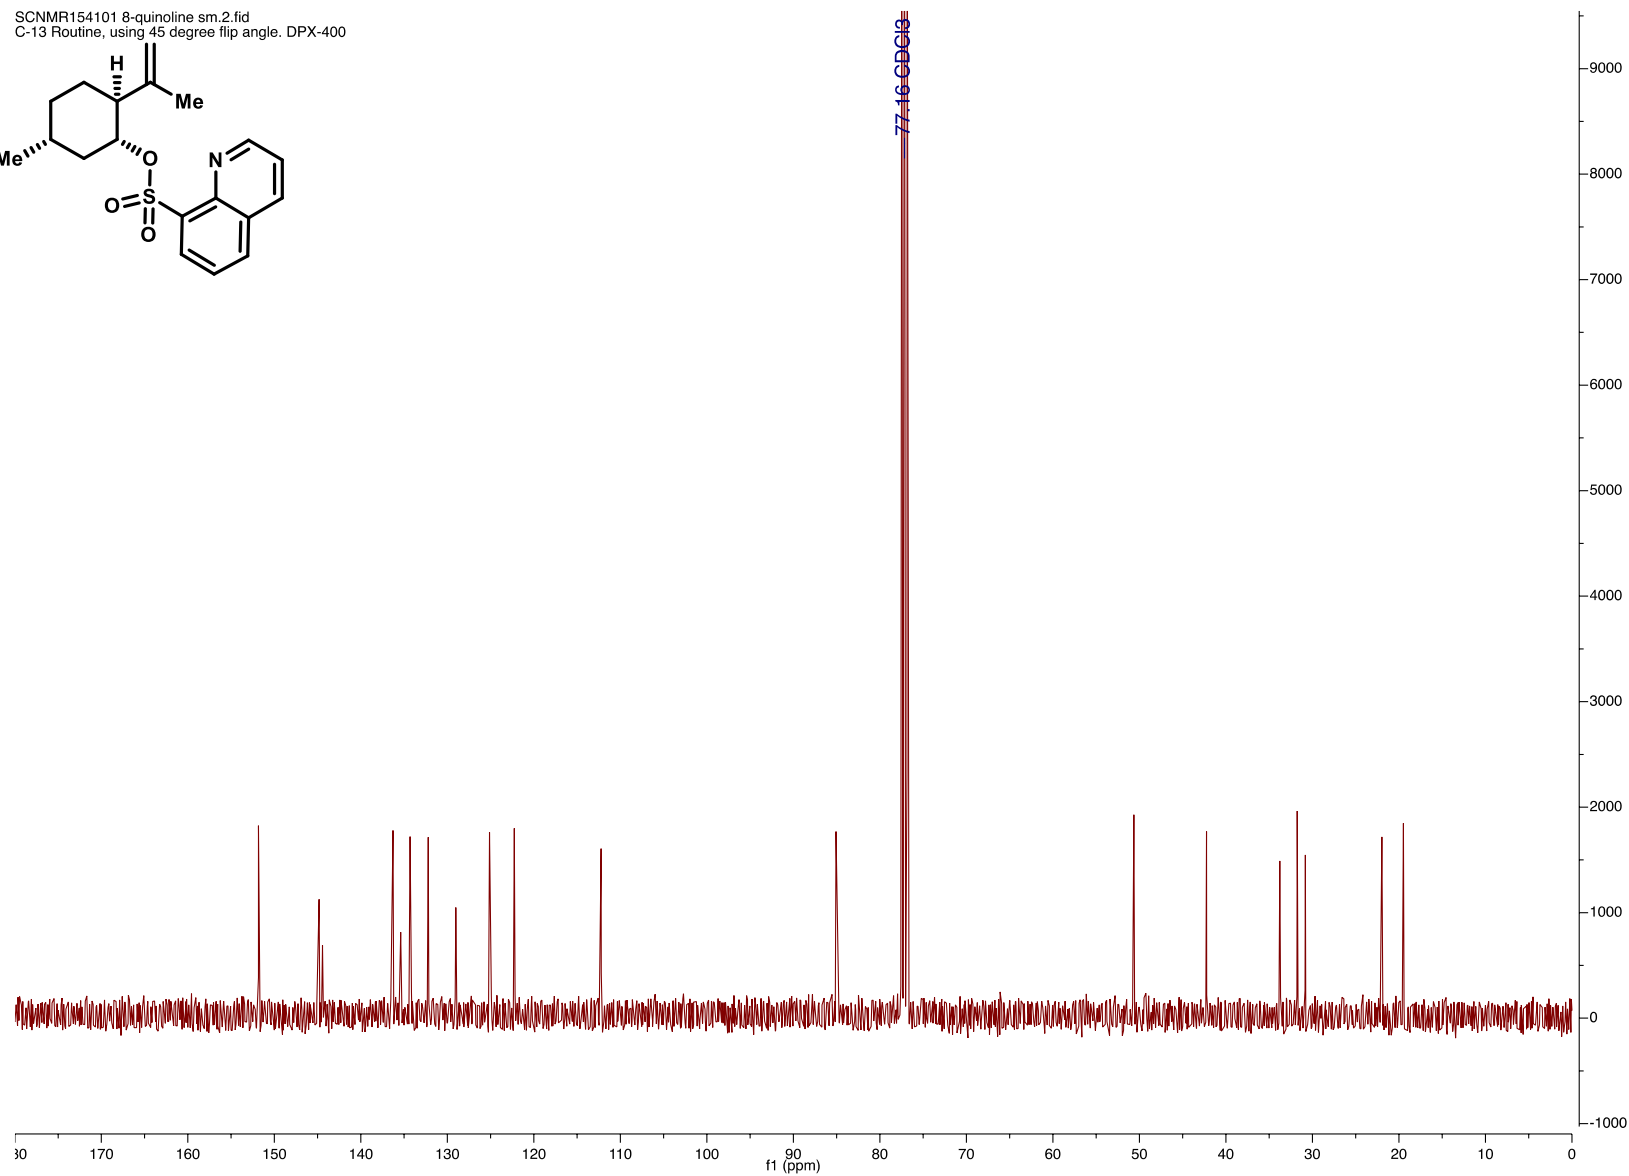

SCNMR154101 8-quinoline sm.2.fid  
C-13 Routine, using 45 degree flip angle. DPX-400

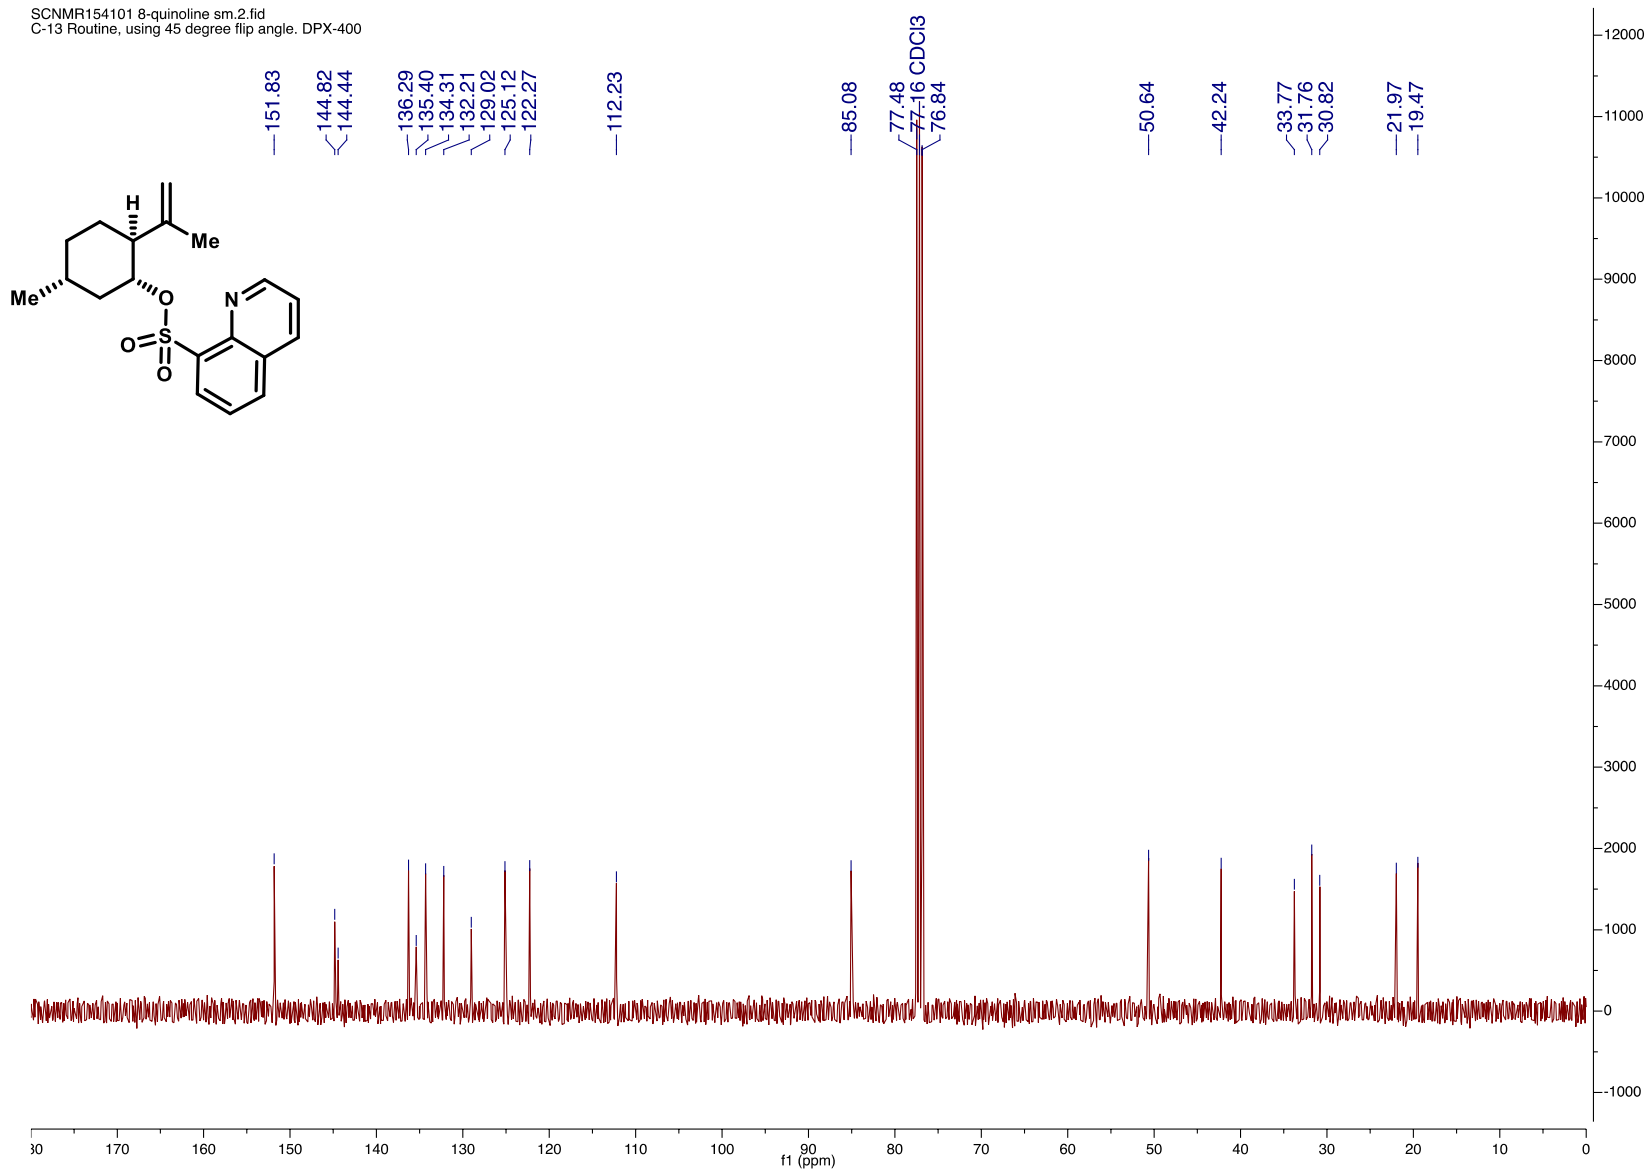

### 13: <sup>1</sup>H-NMR

SCNMR136703.1.fid  
H-1 Routine, CP-DCH, AVIII HD-600

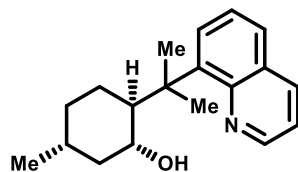

— 7.26 CDCl<sub>3</sub>

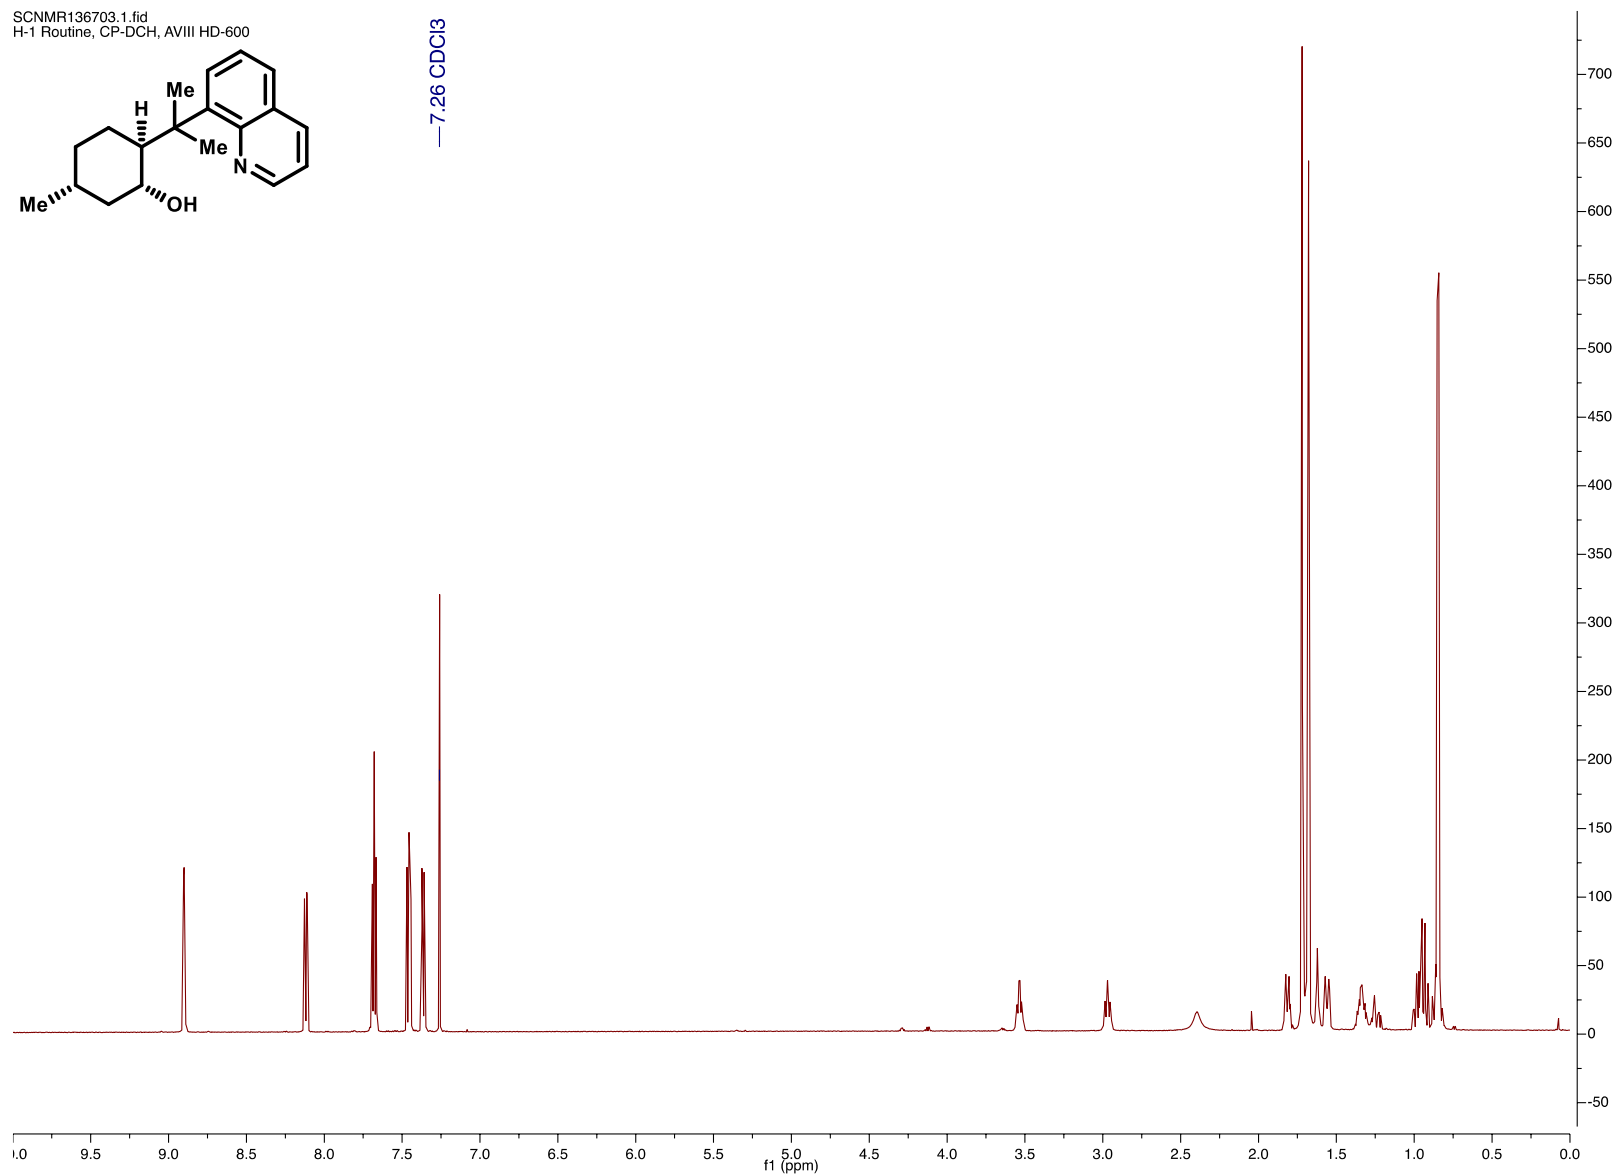

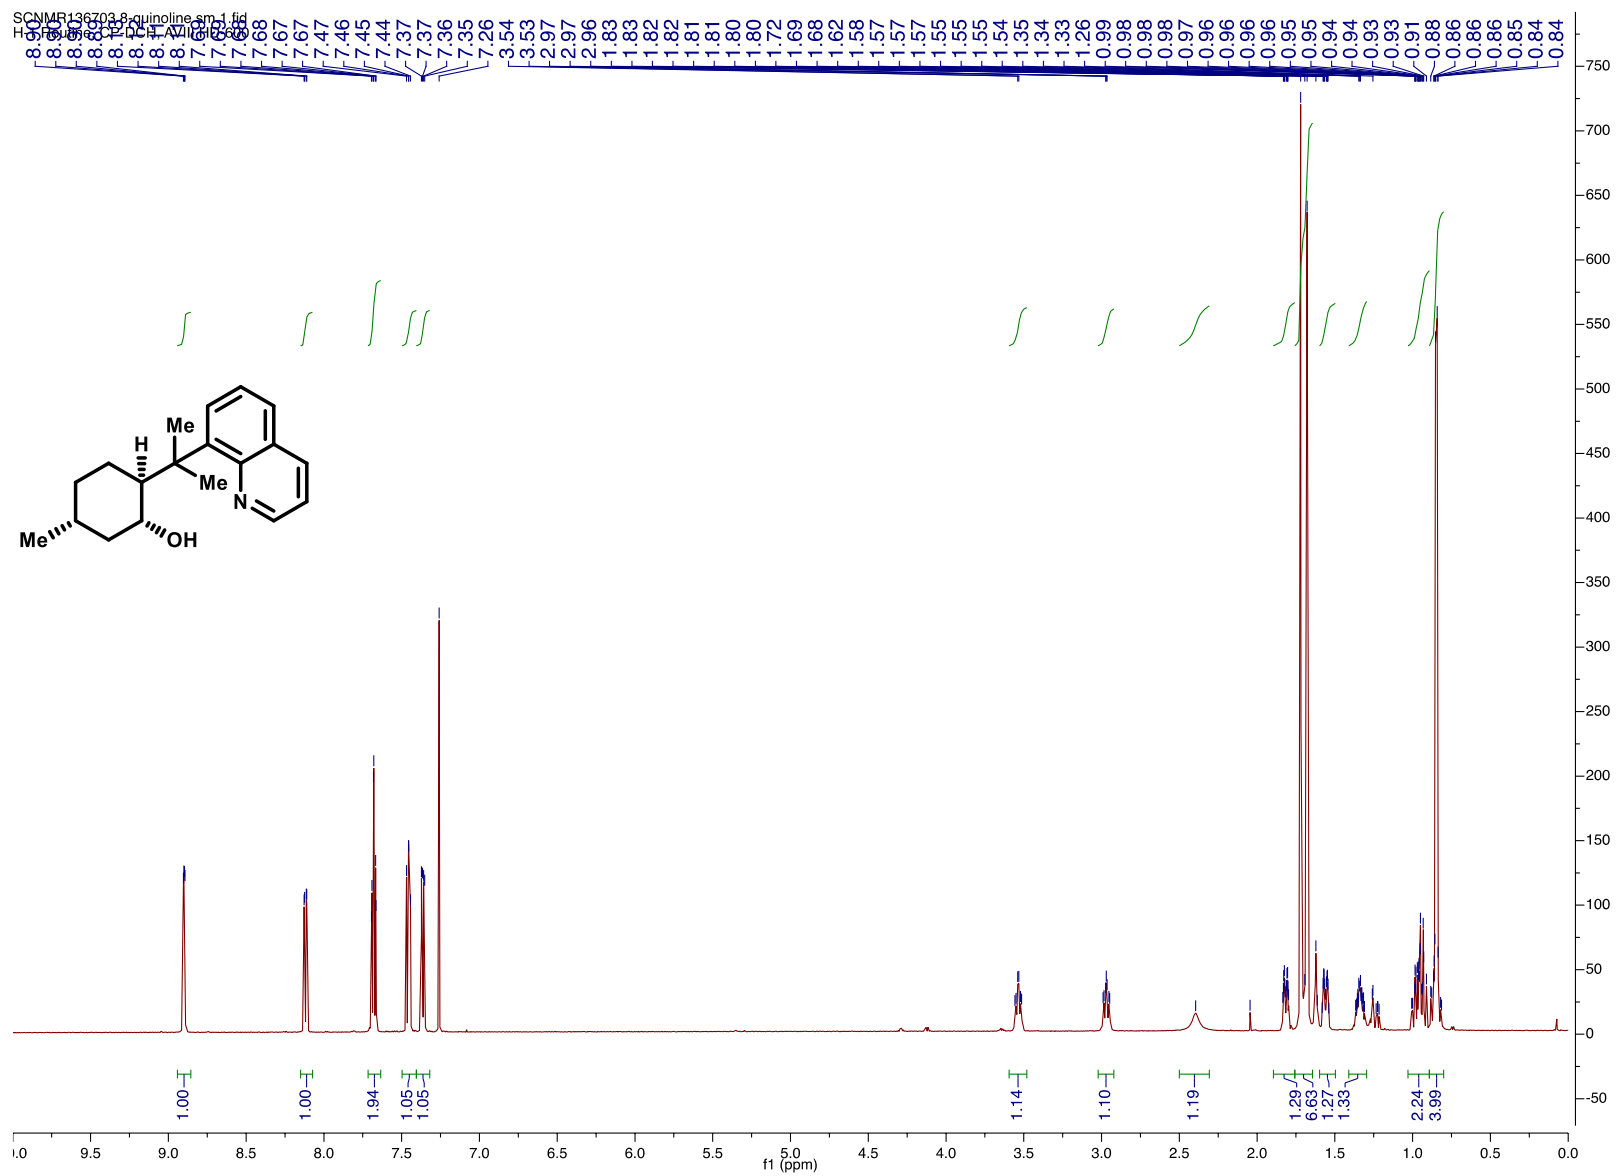

### 13: $^{13}\text{C}$ -NMR

SCNMR136703.2.fid  
C-13 Routine 1D, CPDCH CryoProbe, AVIII-600

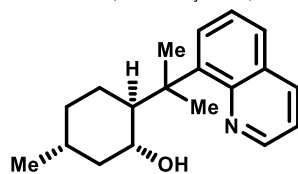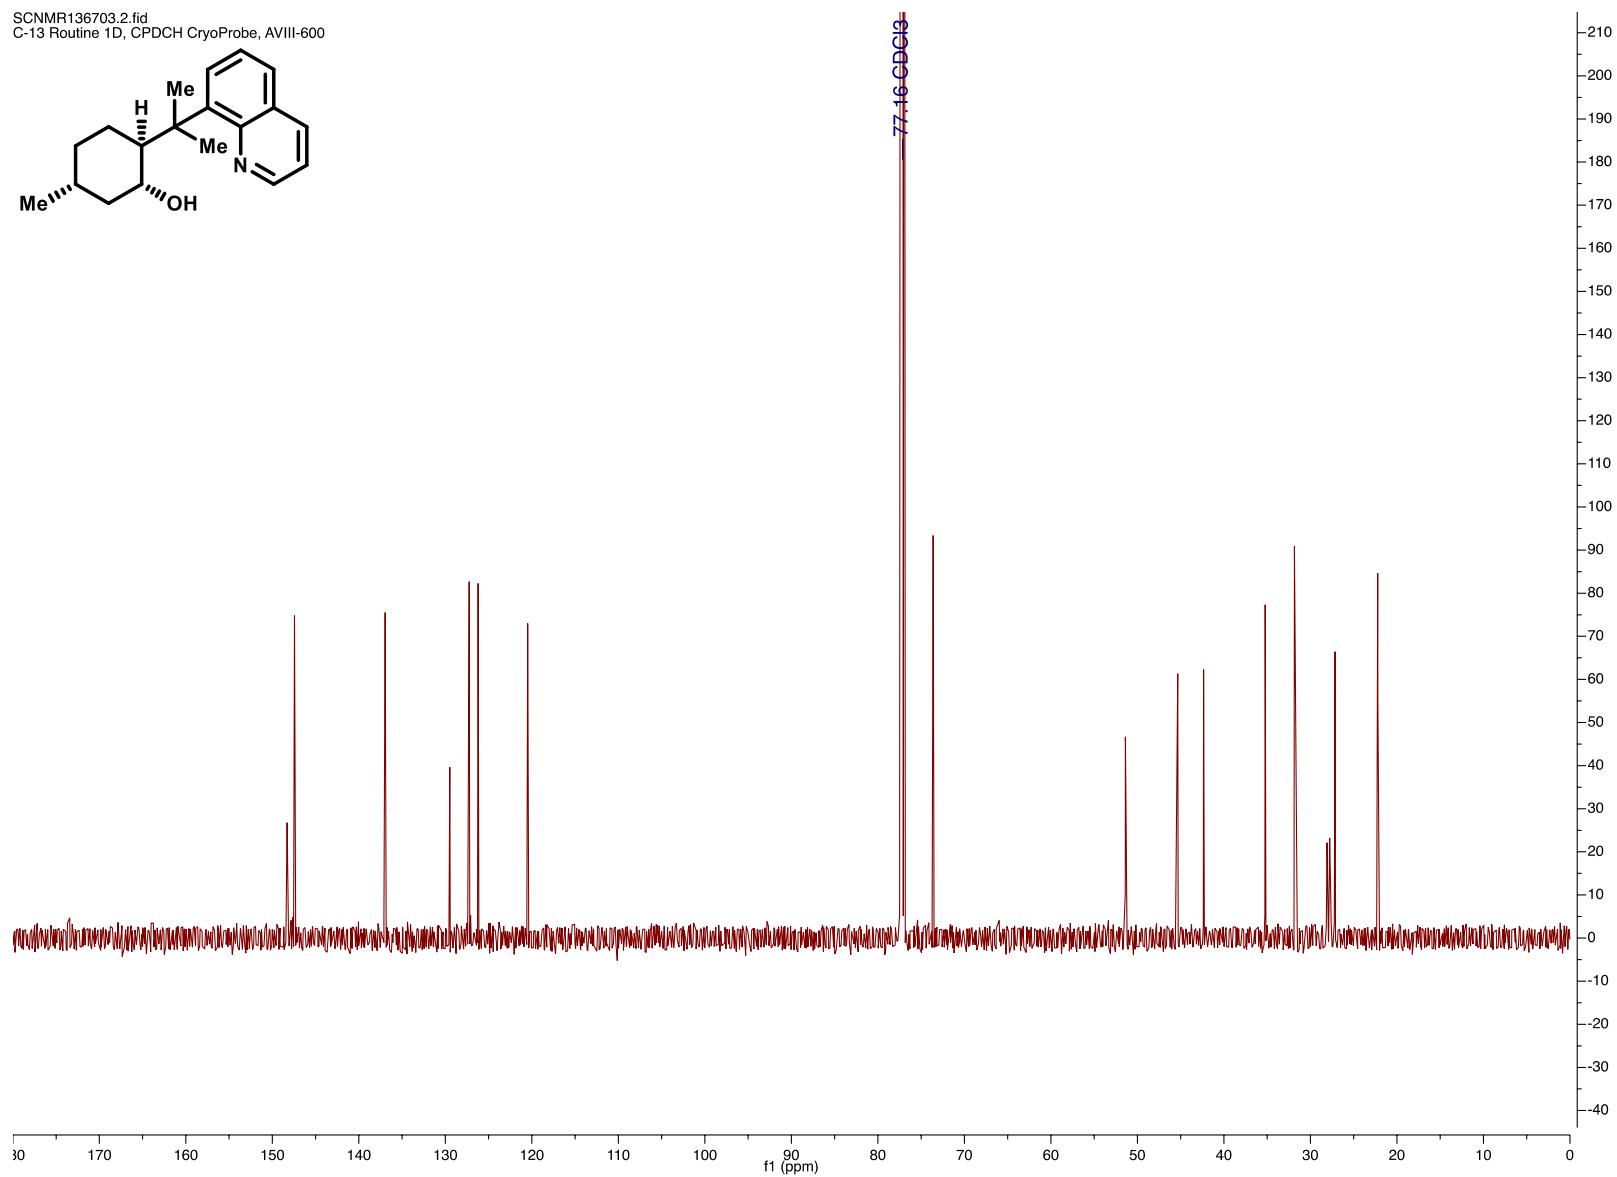

SCNMR136703 8-quinoline sm.2.fid  
C-13 Routine 1D, CPDCH CryoProbe, AVIII-600

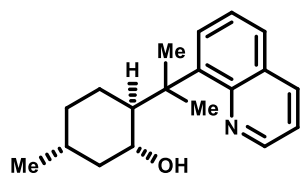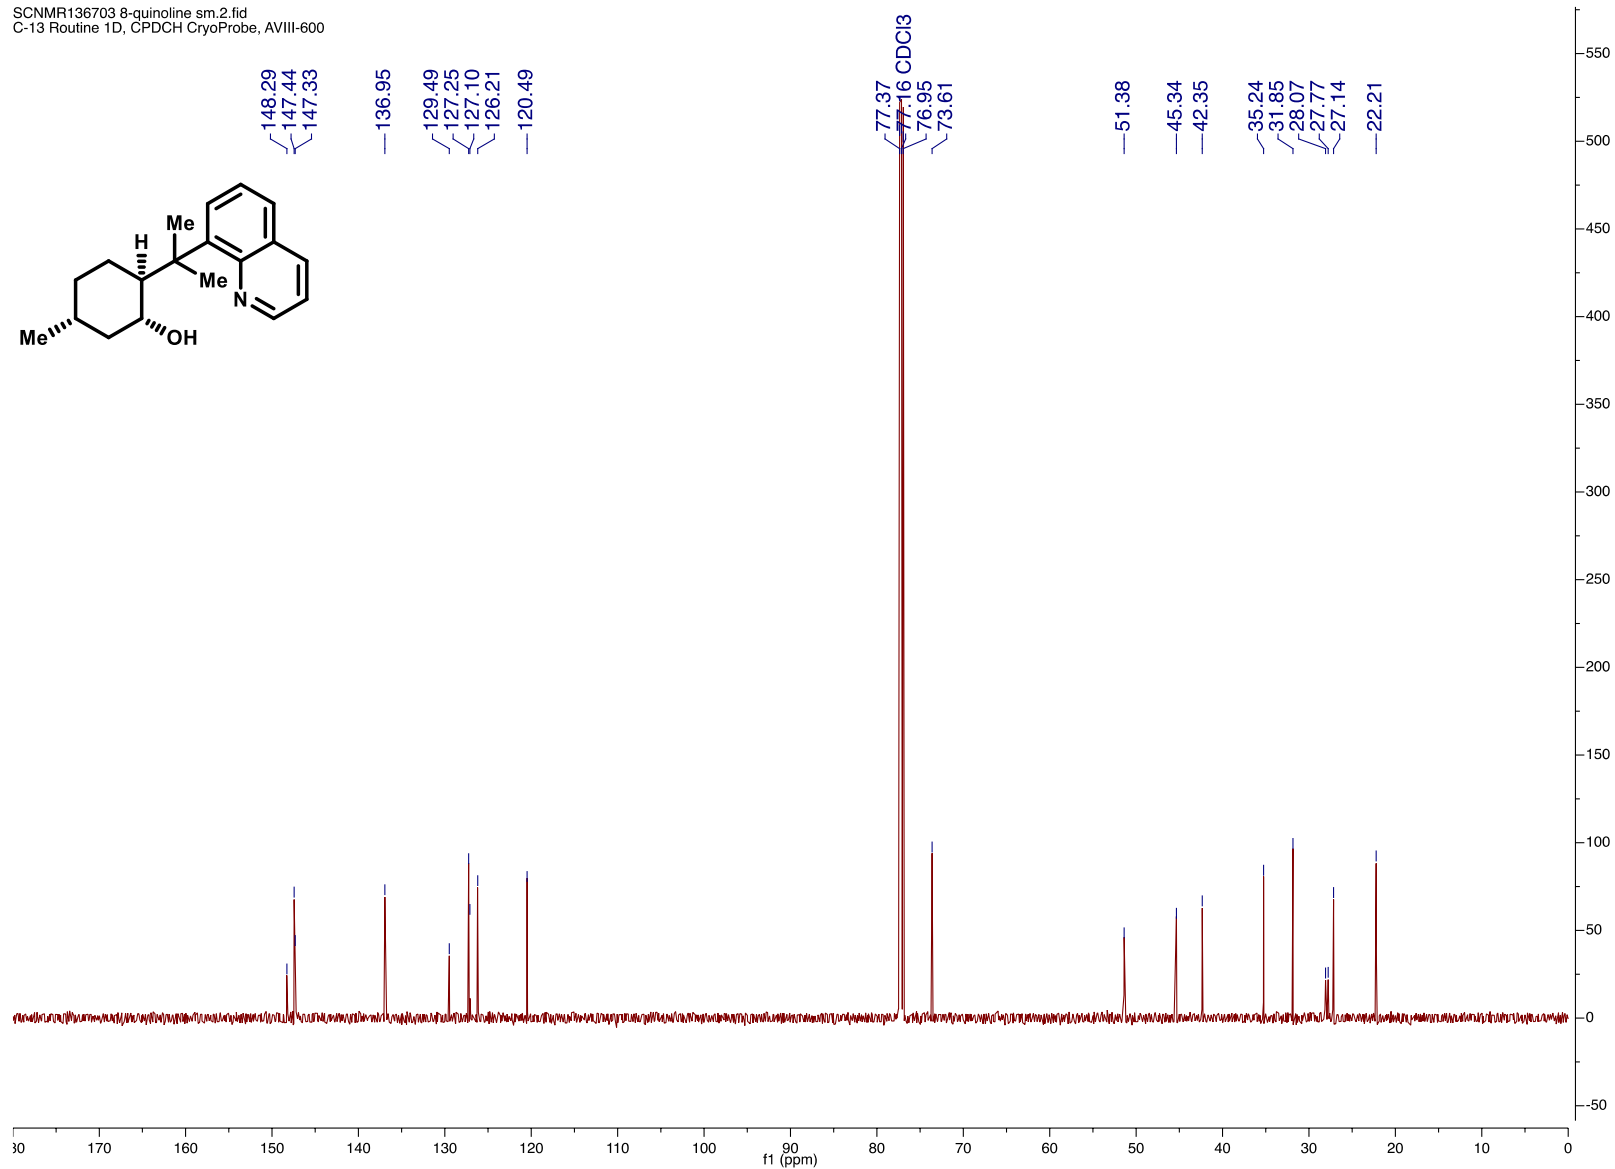

SI-16:  $^1\text{H}$ -NMR

SCNMR154303.1.fid  
H-1 Routine, CP-DCH, AVIII HD-600

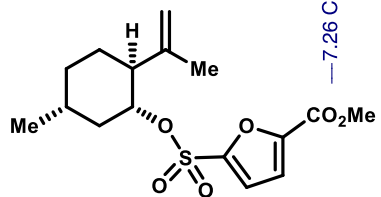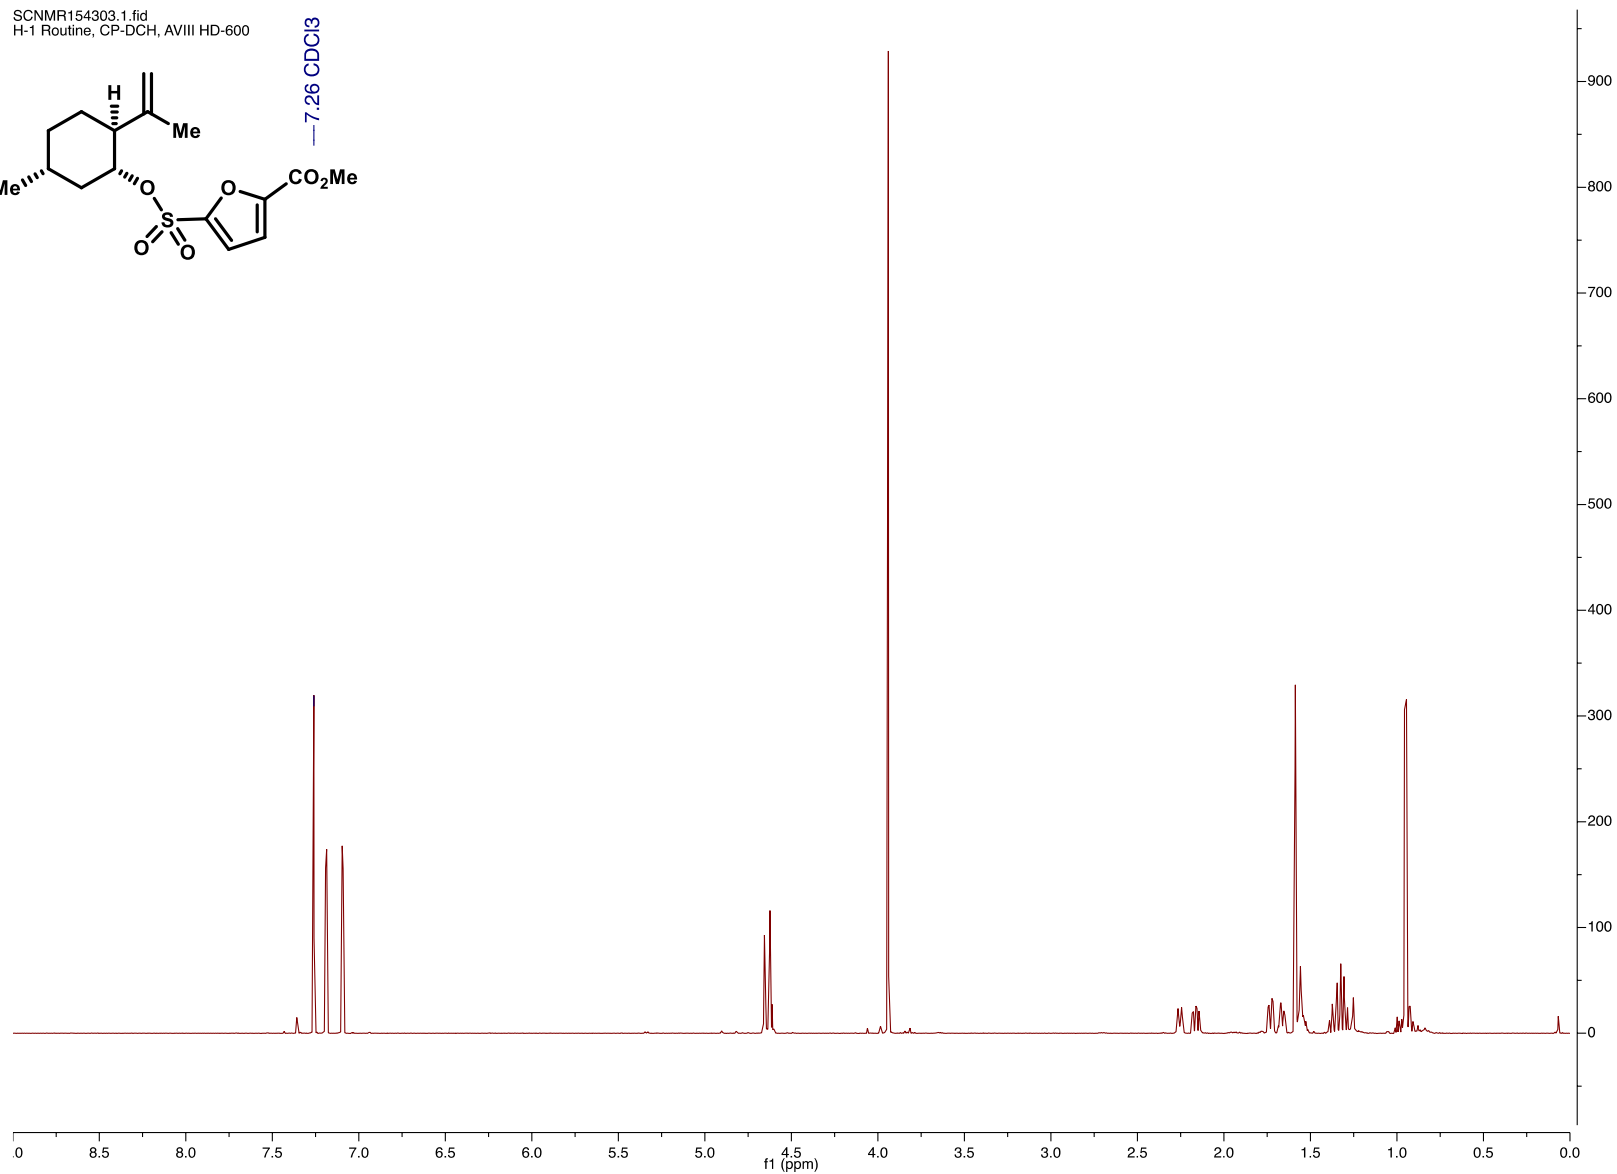

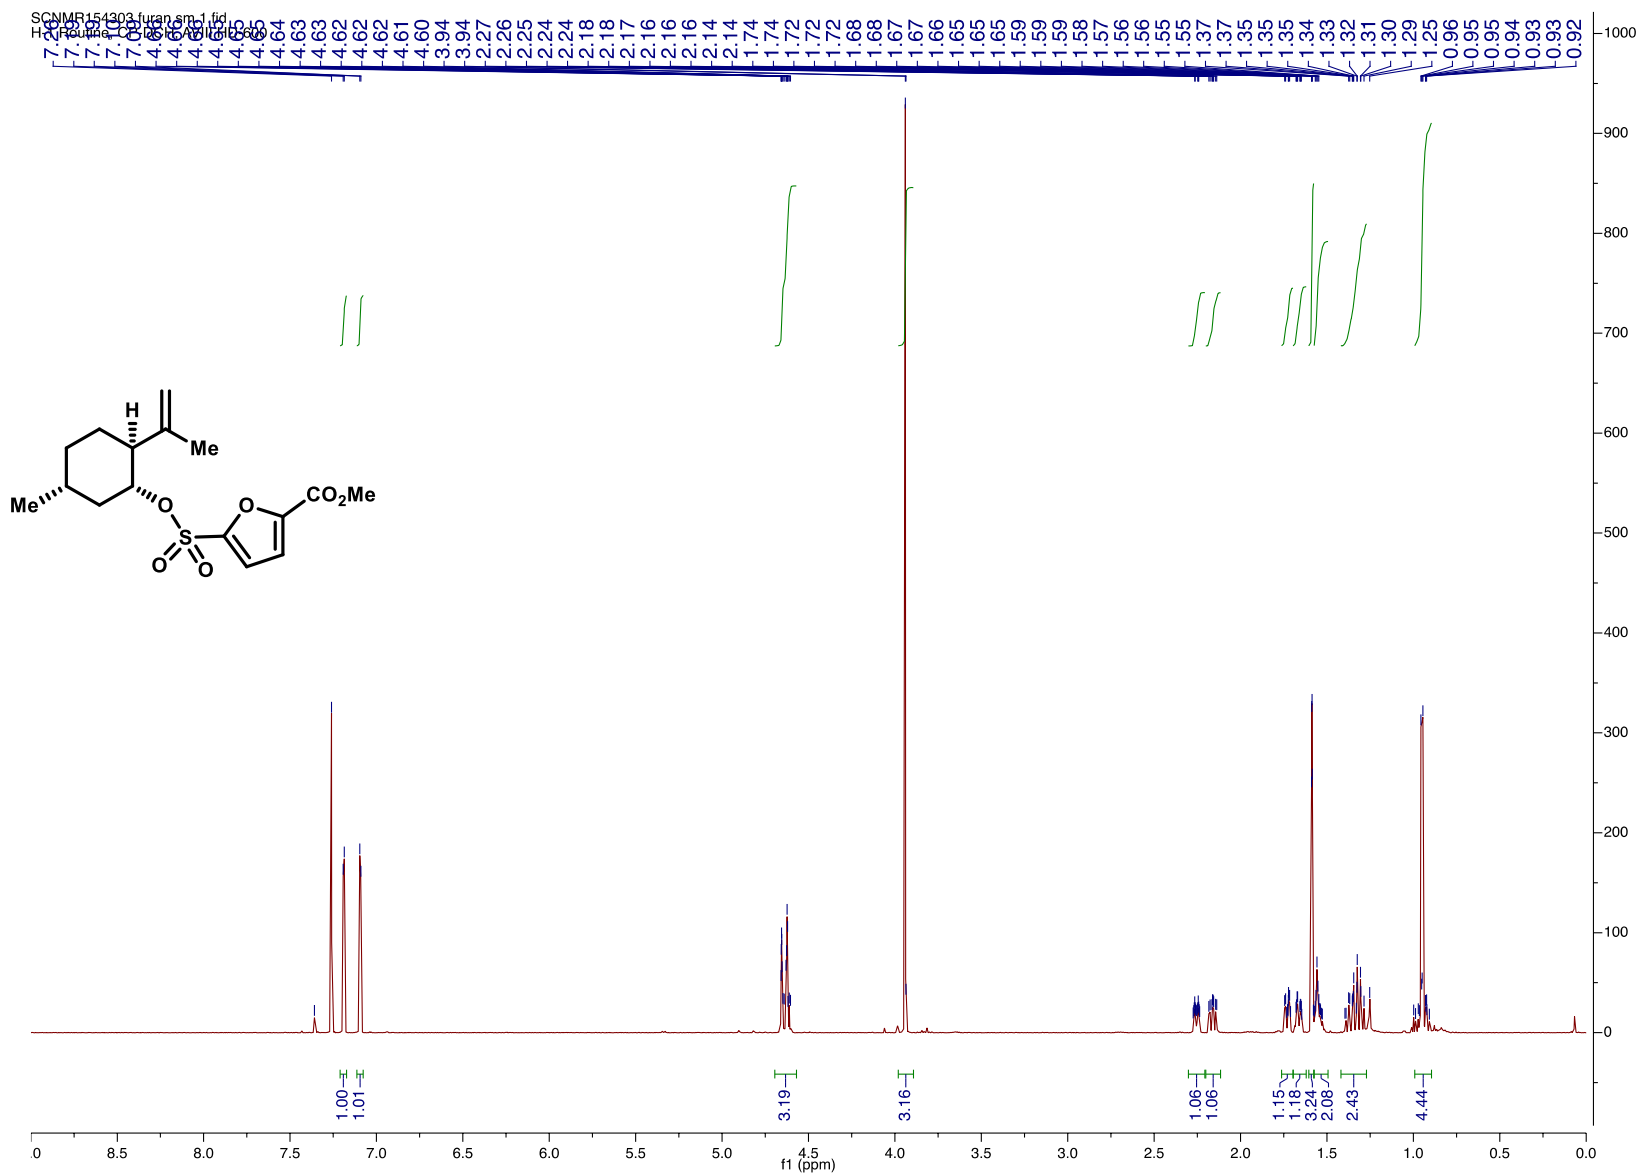



SI-16:  $^{13}\text{C}$ -NMR

SCNMR154303.2.fid  
C-13 Routine 1D, CPDCH CryoProbe, AVIII-600

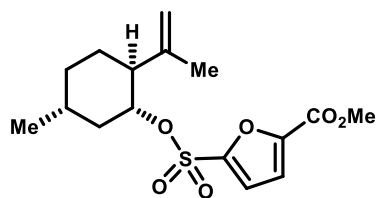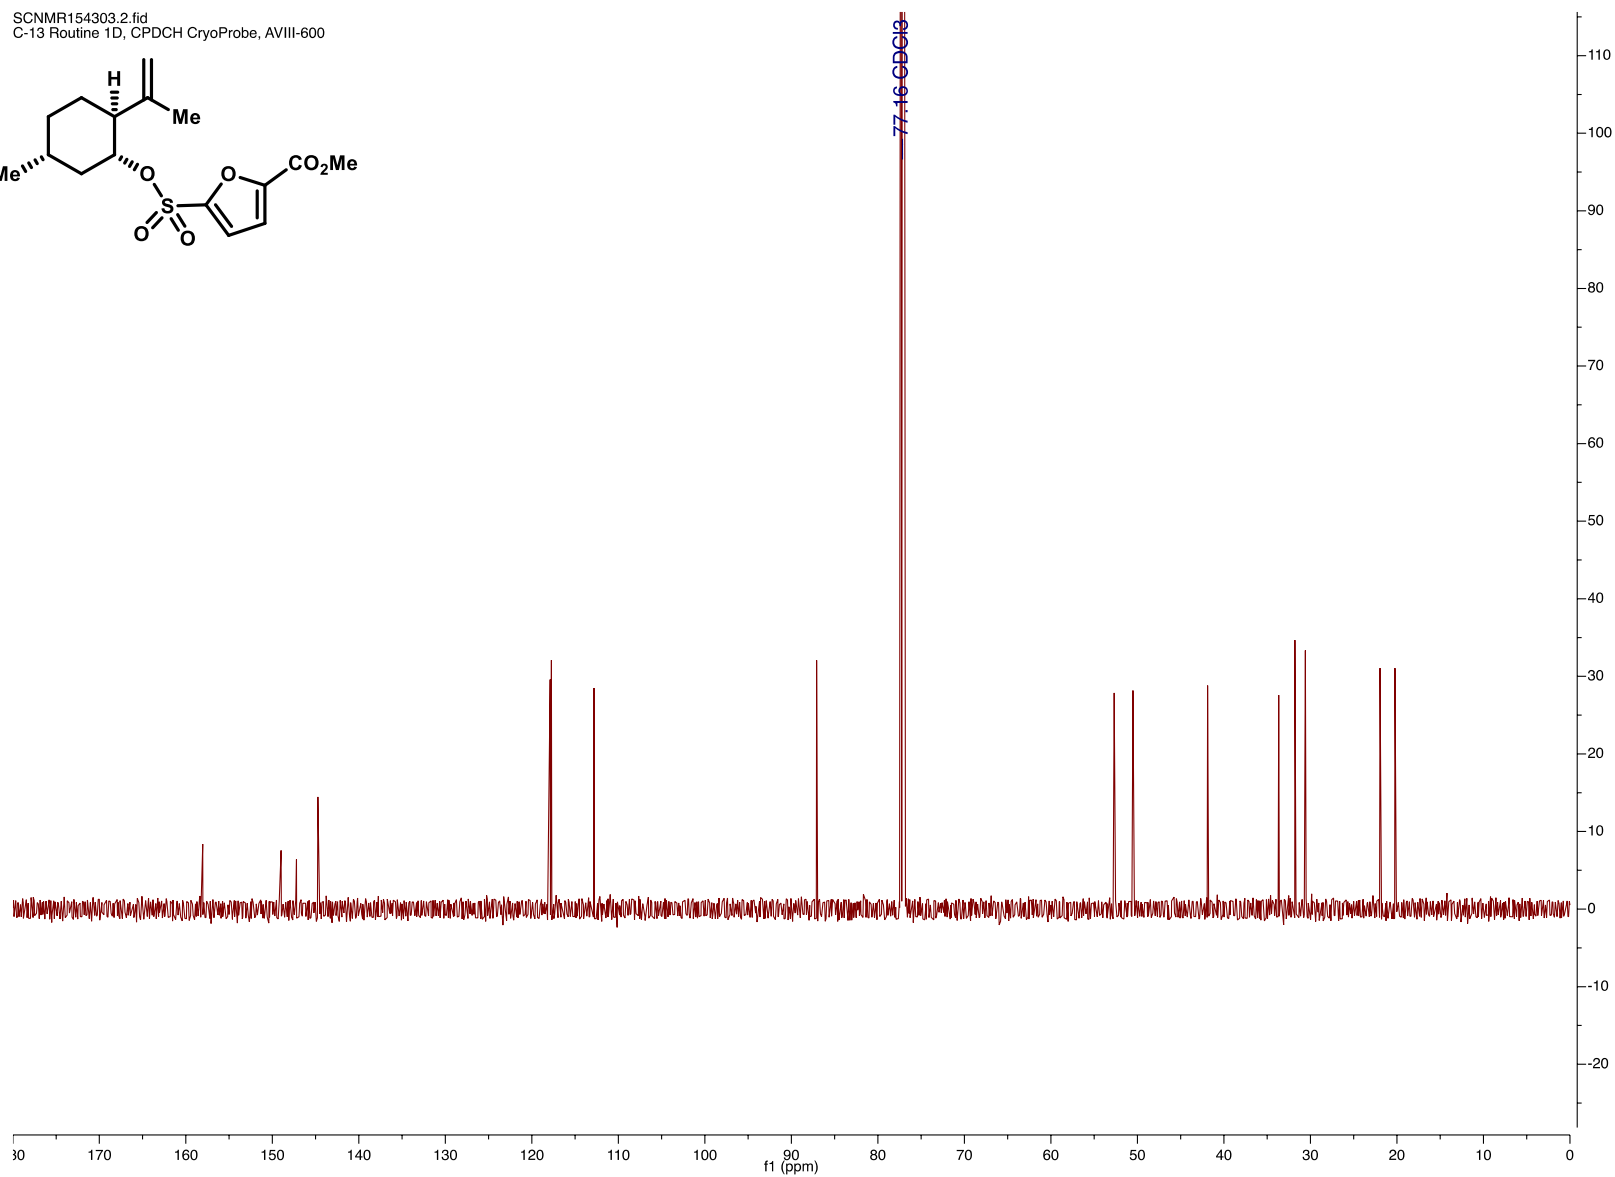

SCNMR154303 furan sm.2.fid  
C-13 Routine 1D, CPDCH CryoProbe, AVIII-600

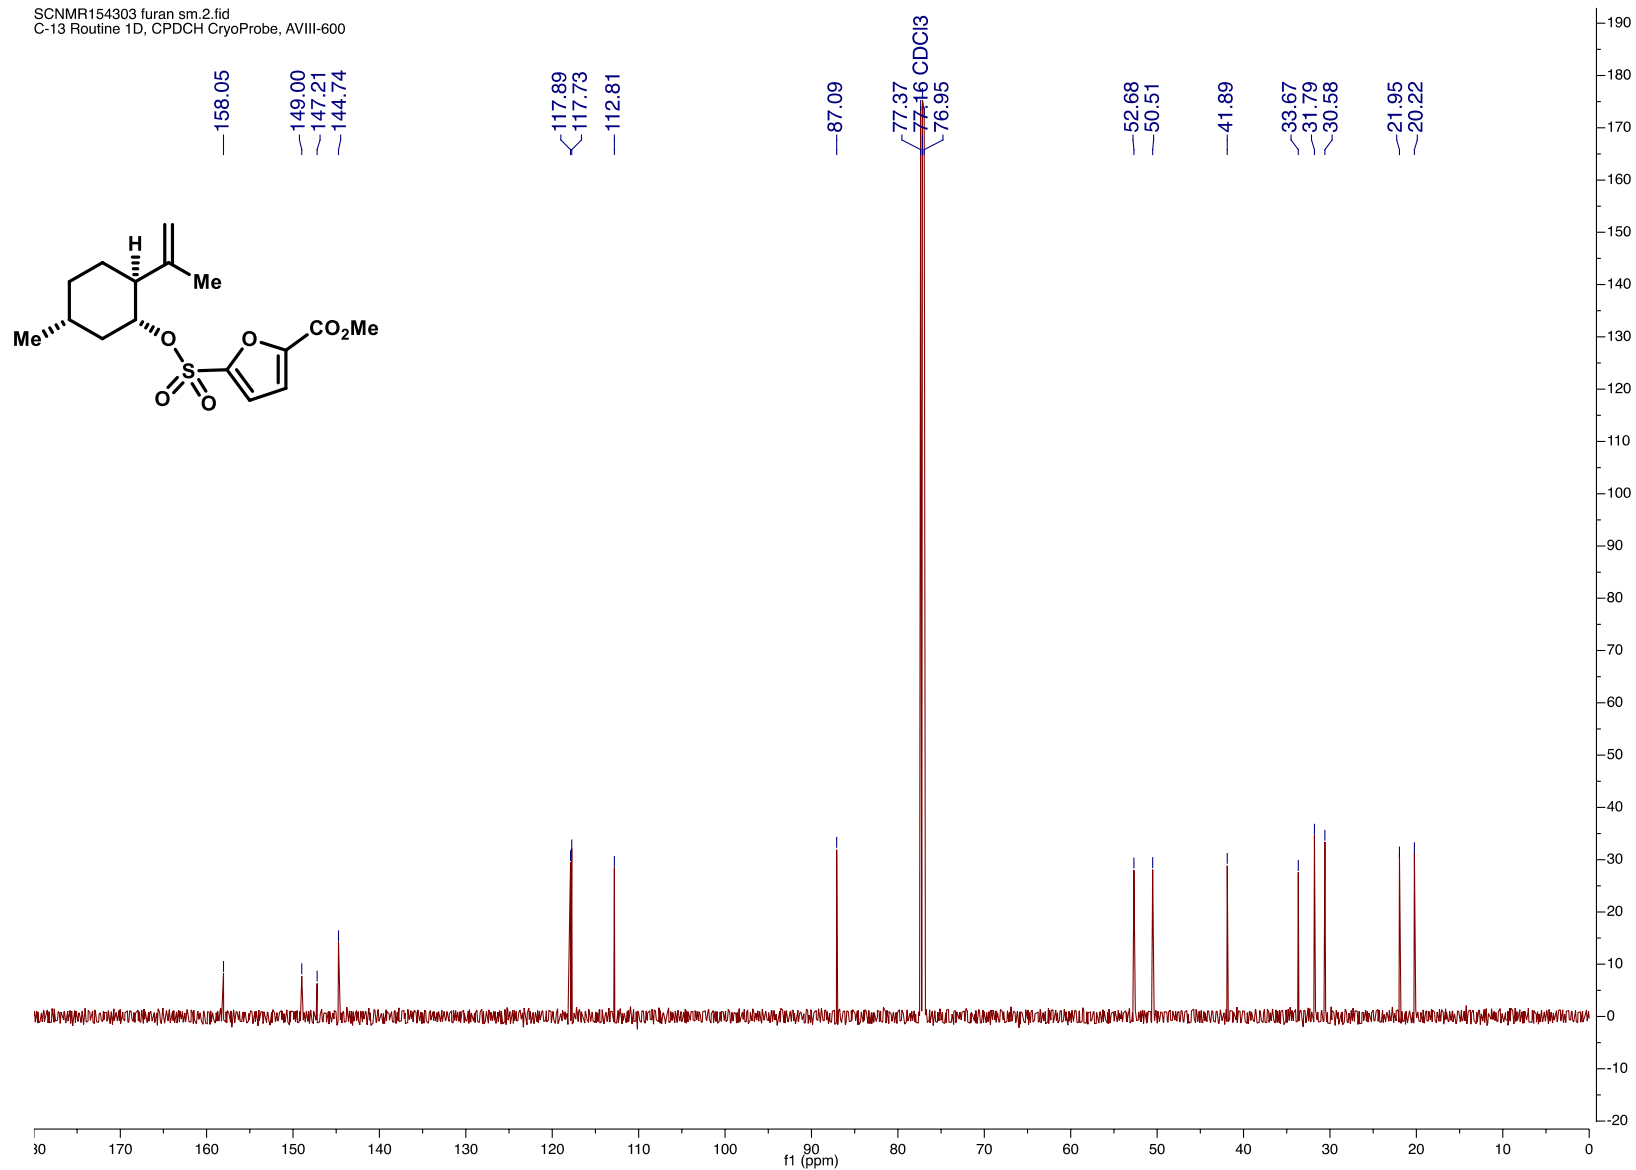

14: <sup>1</sup>H-NMR

SCNMR124202.1.fid  
H-1 Routine, CP-DCH, AVIII HD-600

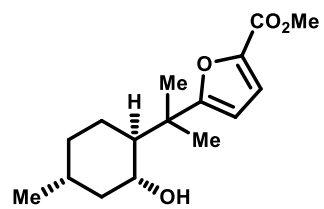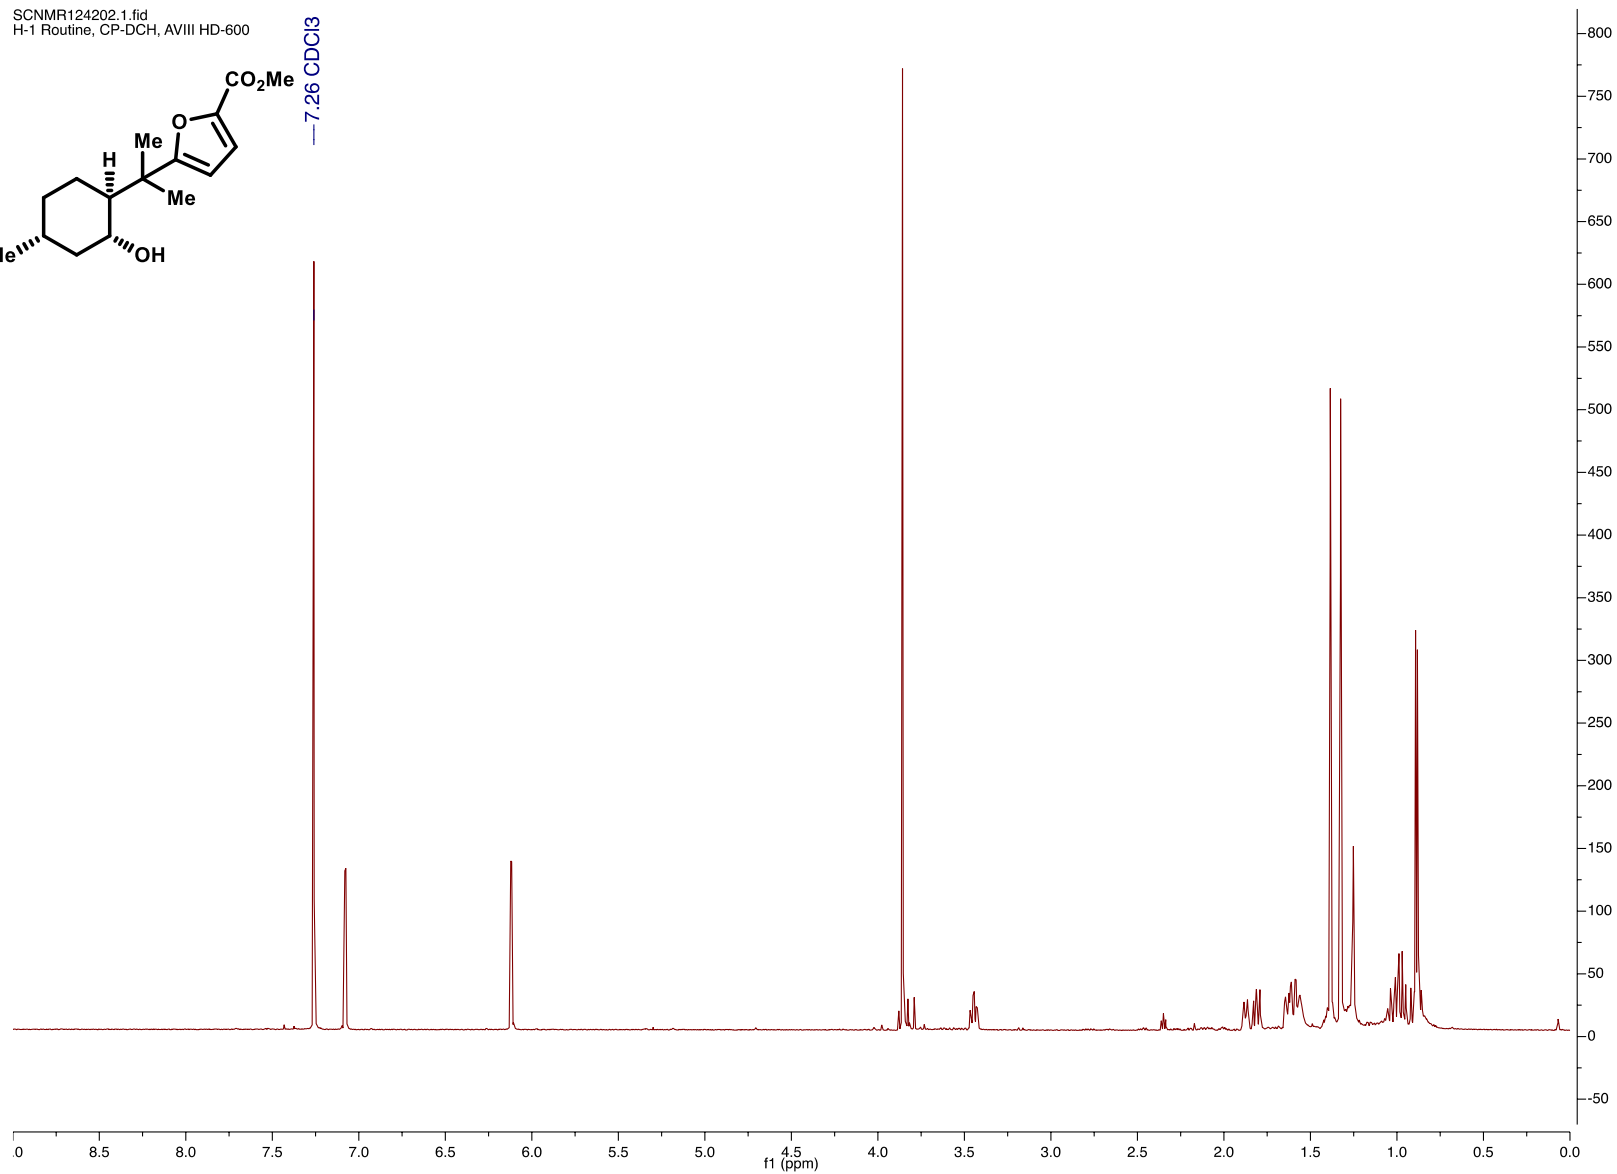

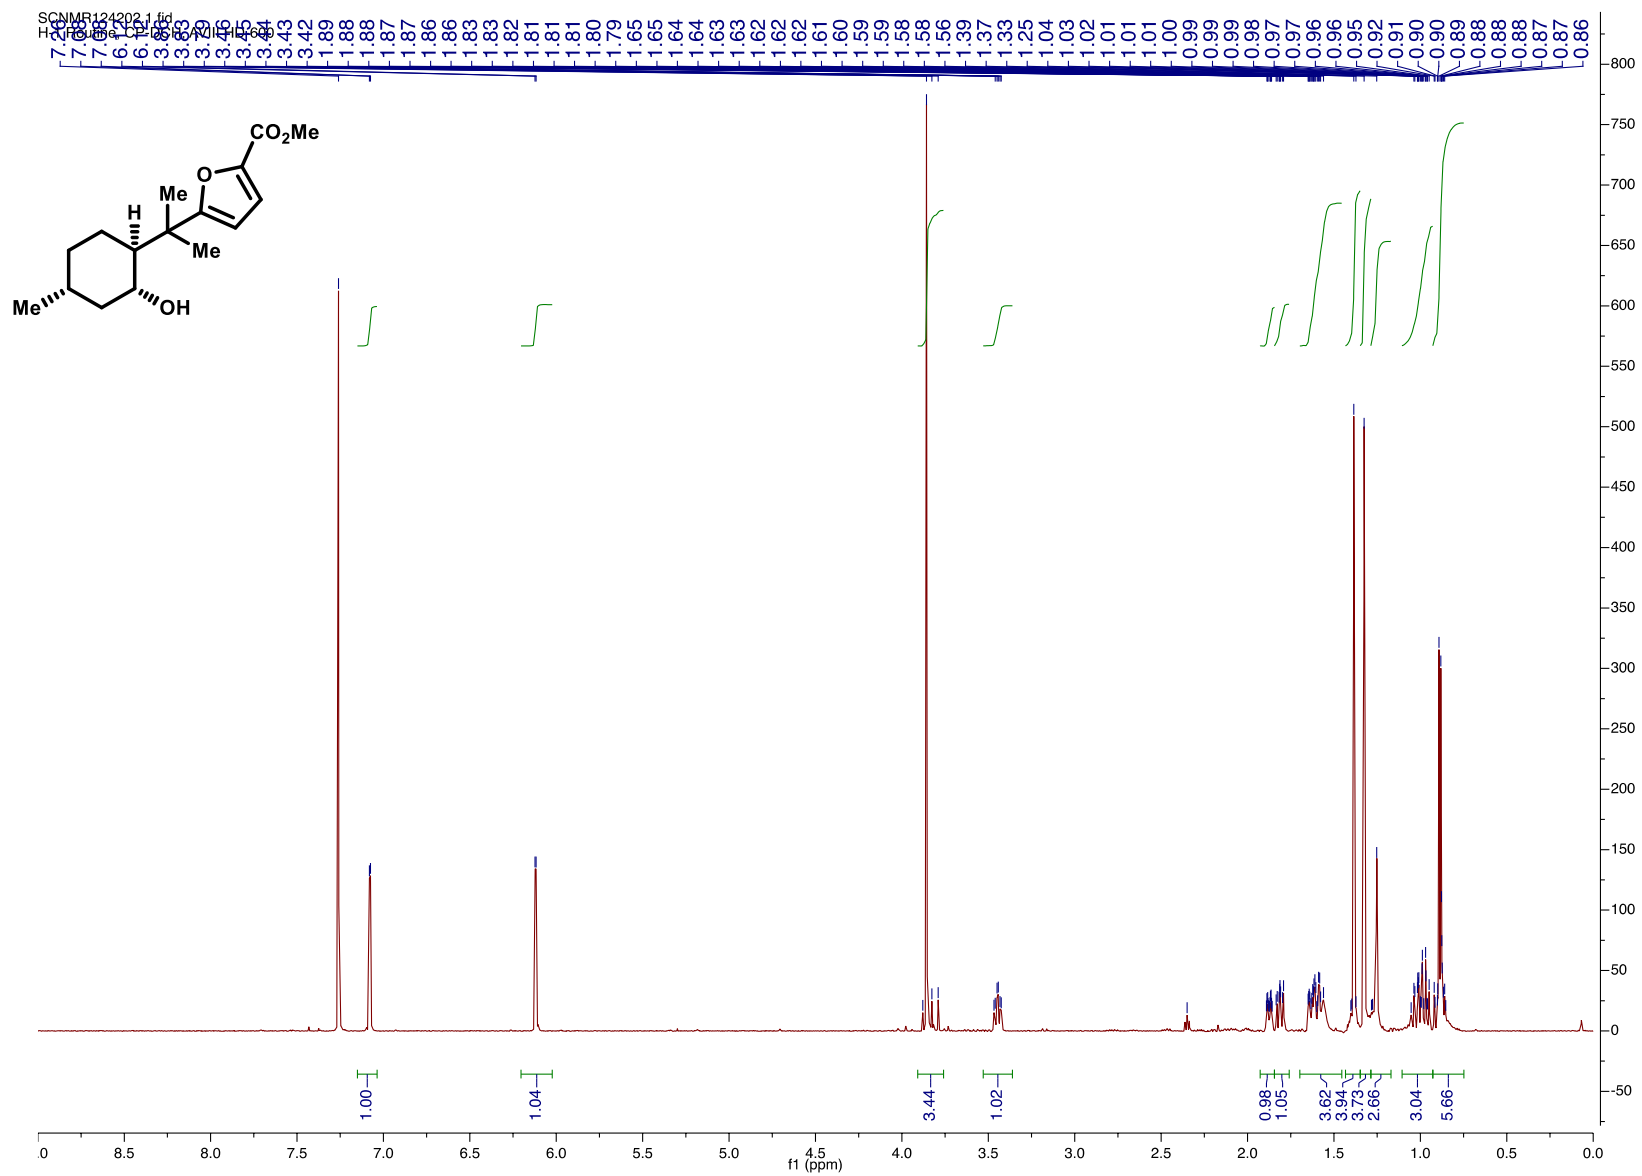

# 14: <sup>13</sup>C-NMR

SCNMR124203.2.fid  
C-13 Routine 1D, CPDCH CryoProbe, AVIII-600

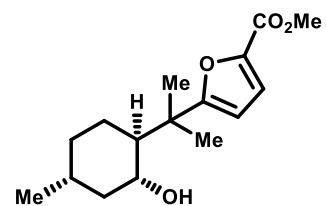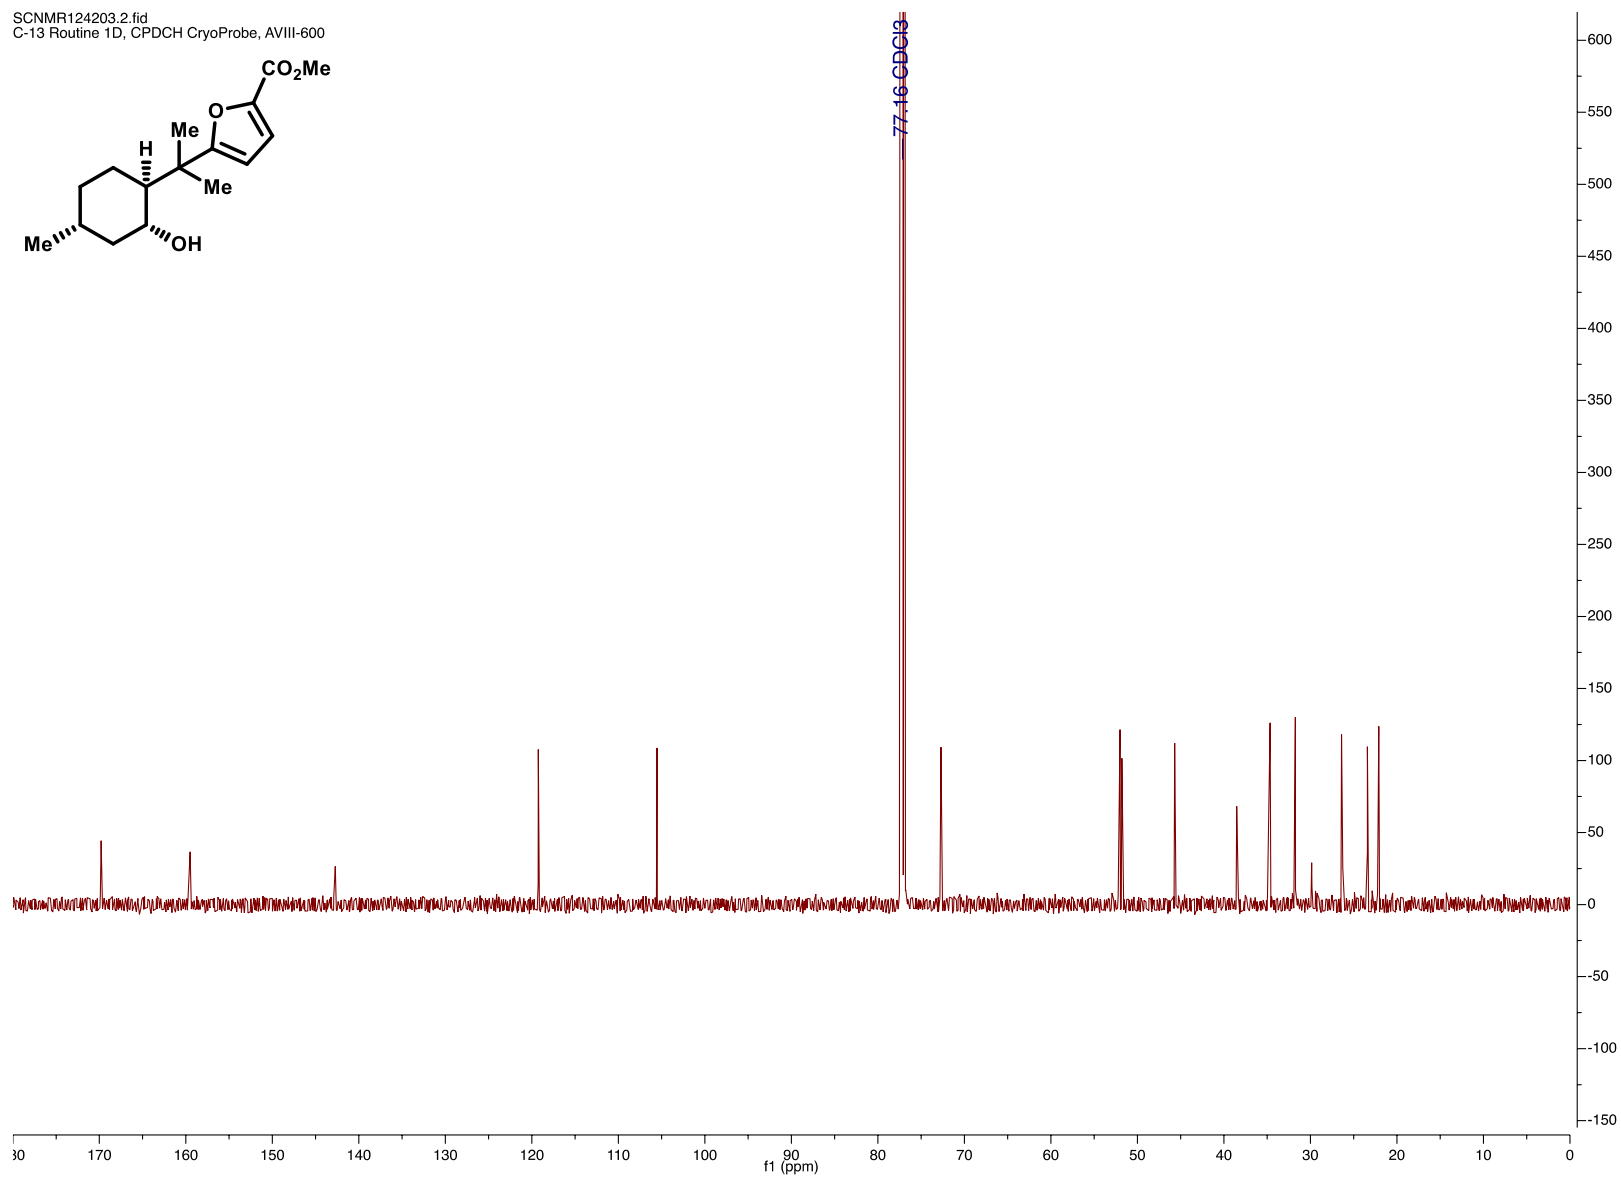

SCNMR124203 furan pdt hq.2.fid  
C-13 Routine 1D, CPDCH CryoProbe, AVIII-600

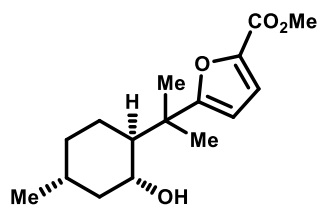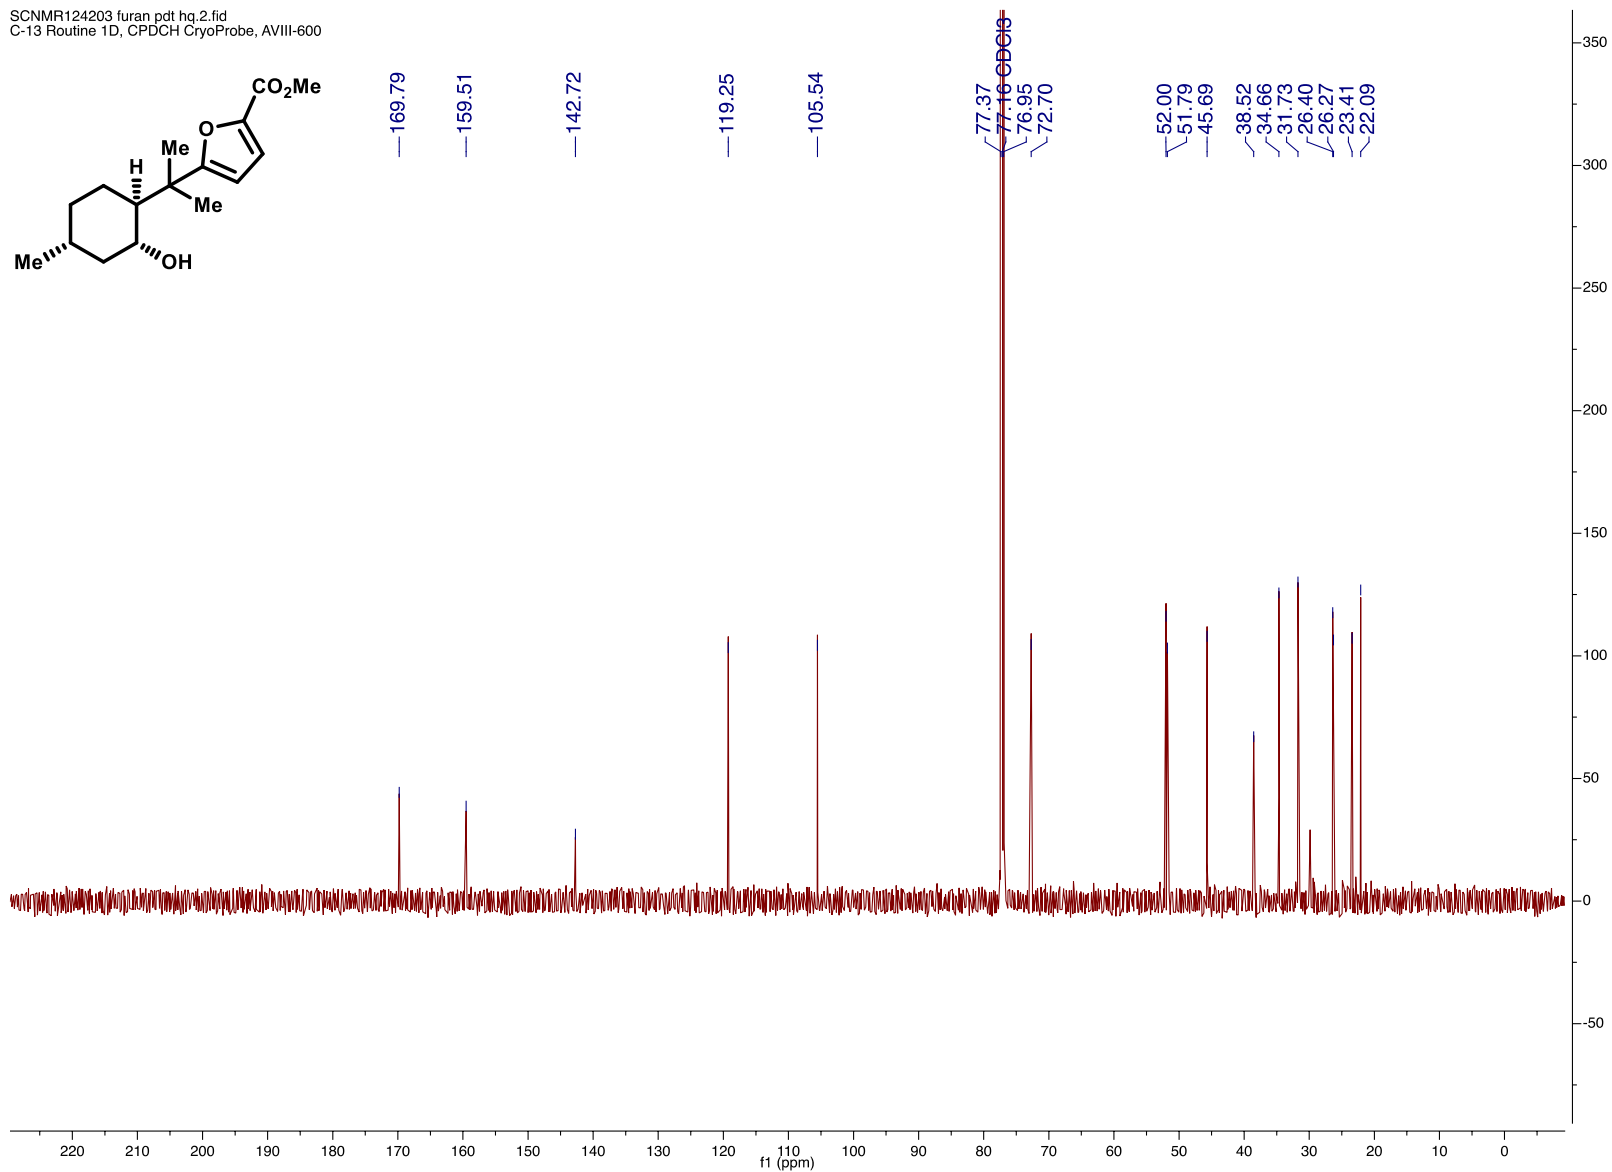

SI-17:  $^1\text{H}$ -NMR (400 MHz,  $\text{CDCl}_3$ )

RMM2\_0323\_dp4.1.fid

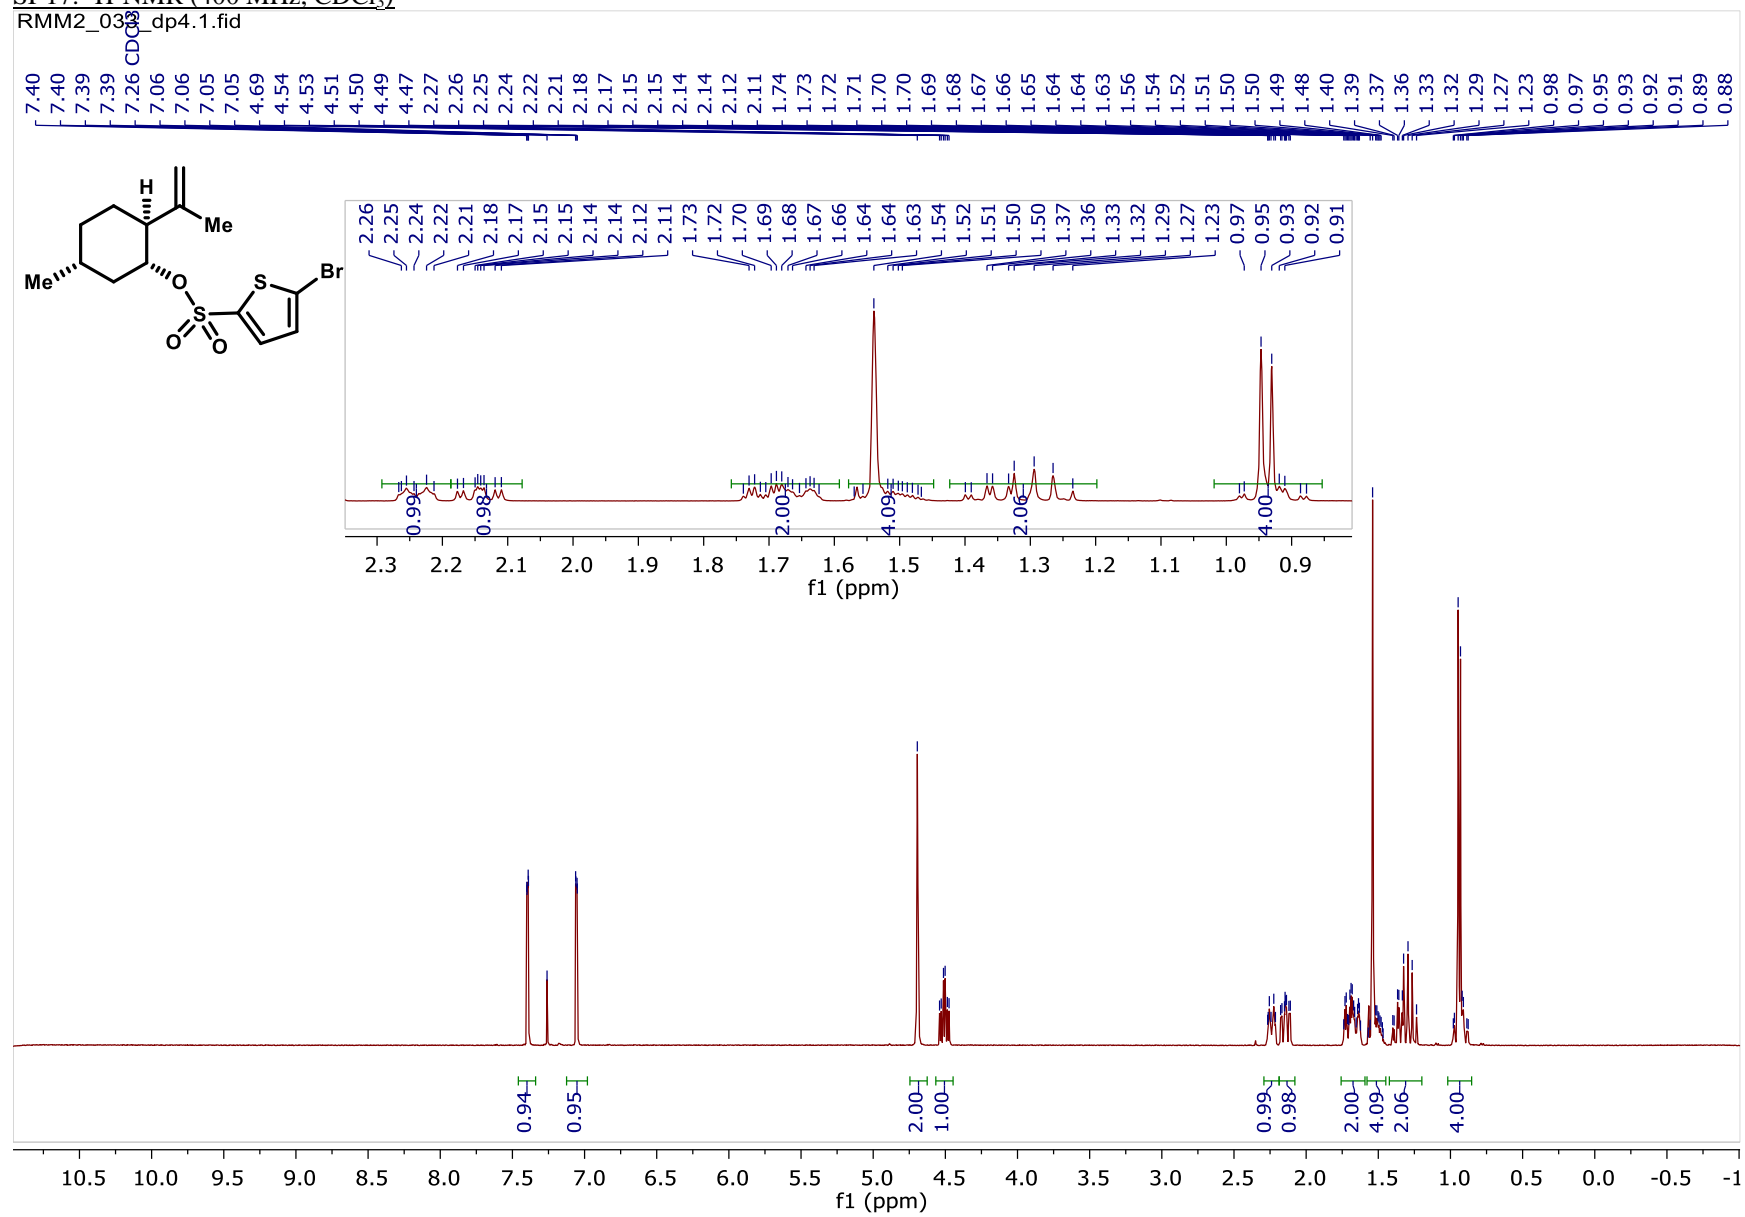

RMM2\_033\_dp4.1.fid

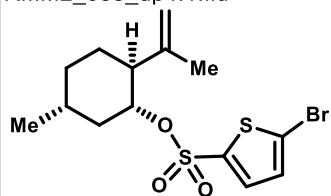

— 7.26 CDCl<sub>3</sub>

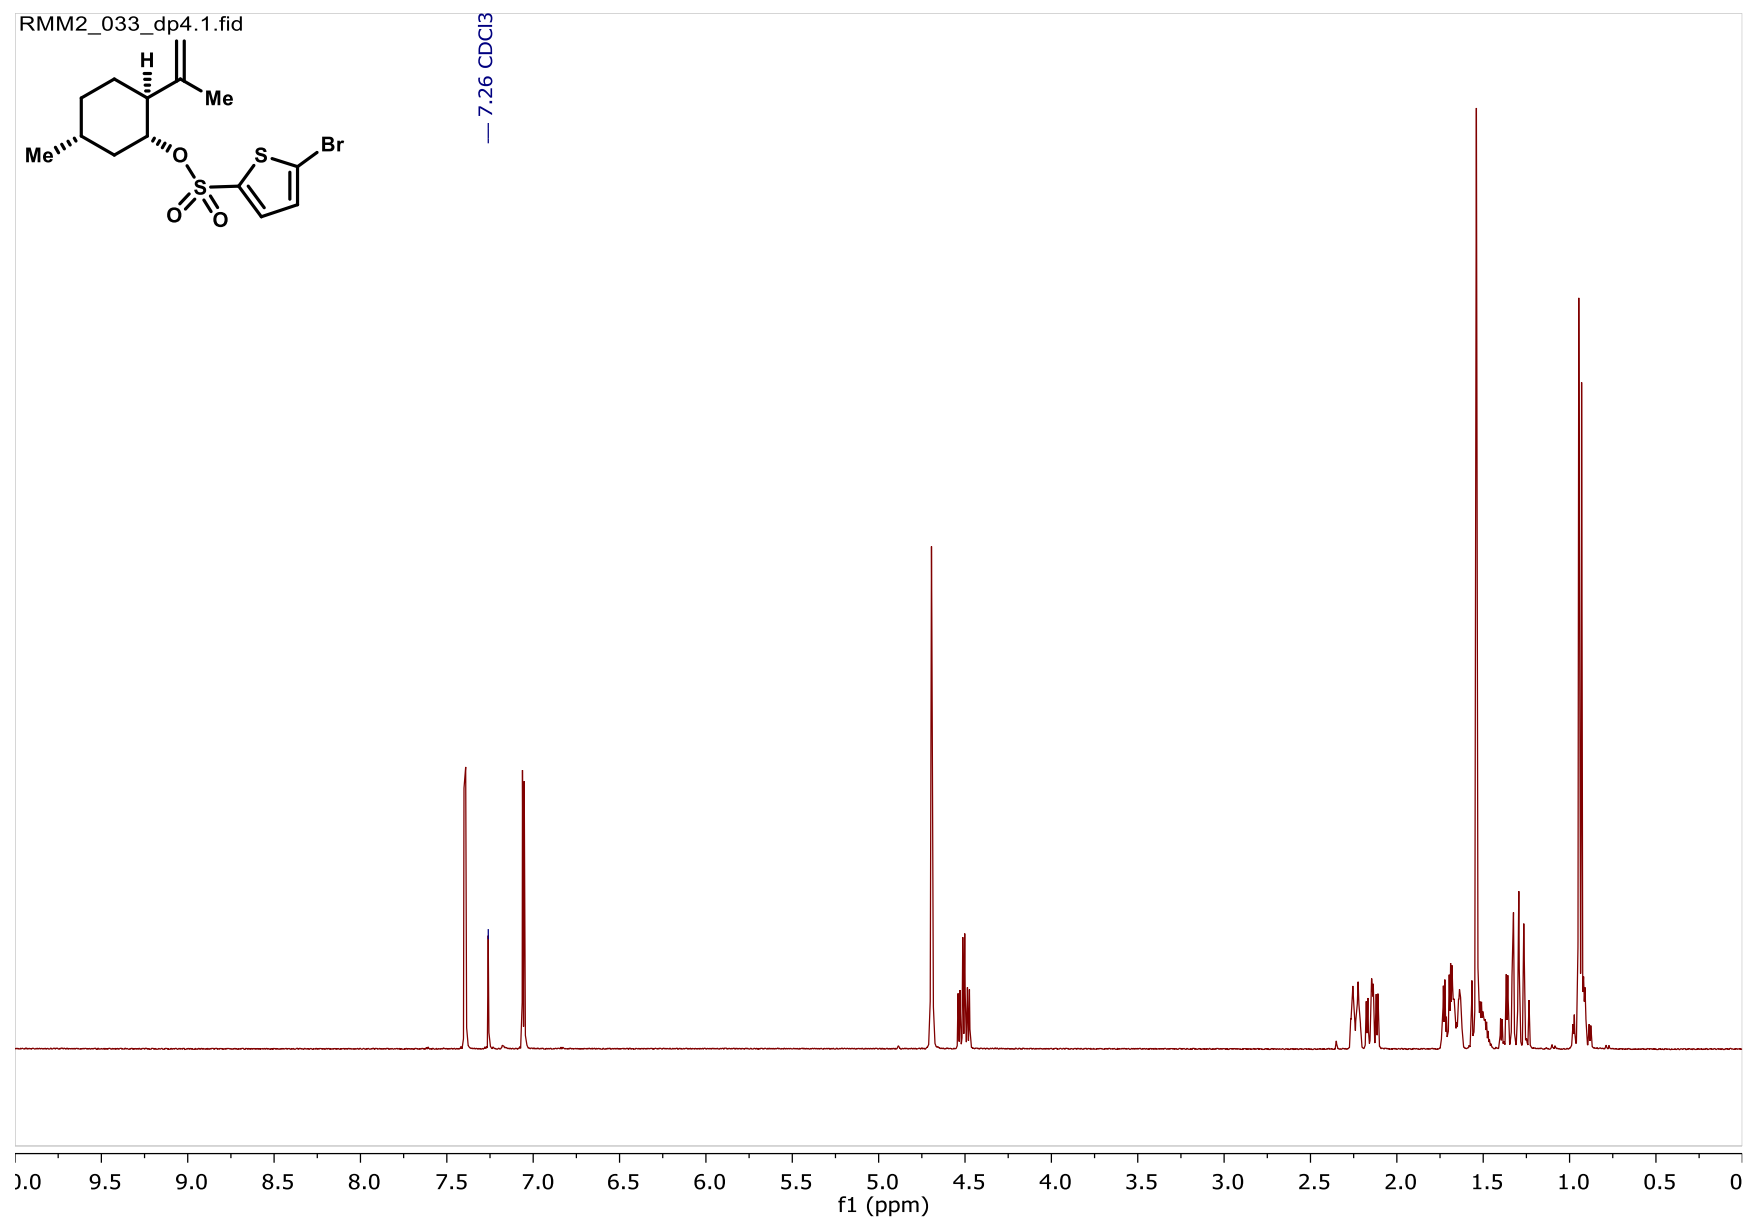



SI-17:  $^{13}\text{C}$ -NMR (101 MHz,  $\text{CDCl}_3$ )

RMM2\_033\_dp4.2.fid

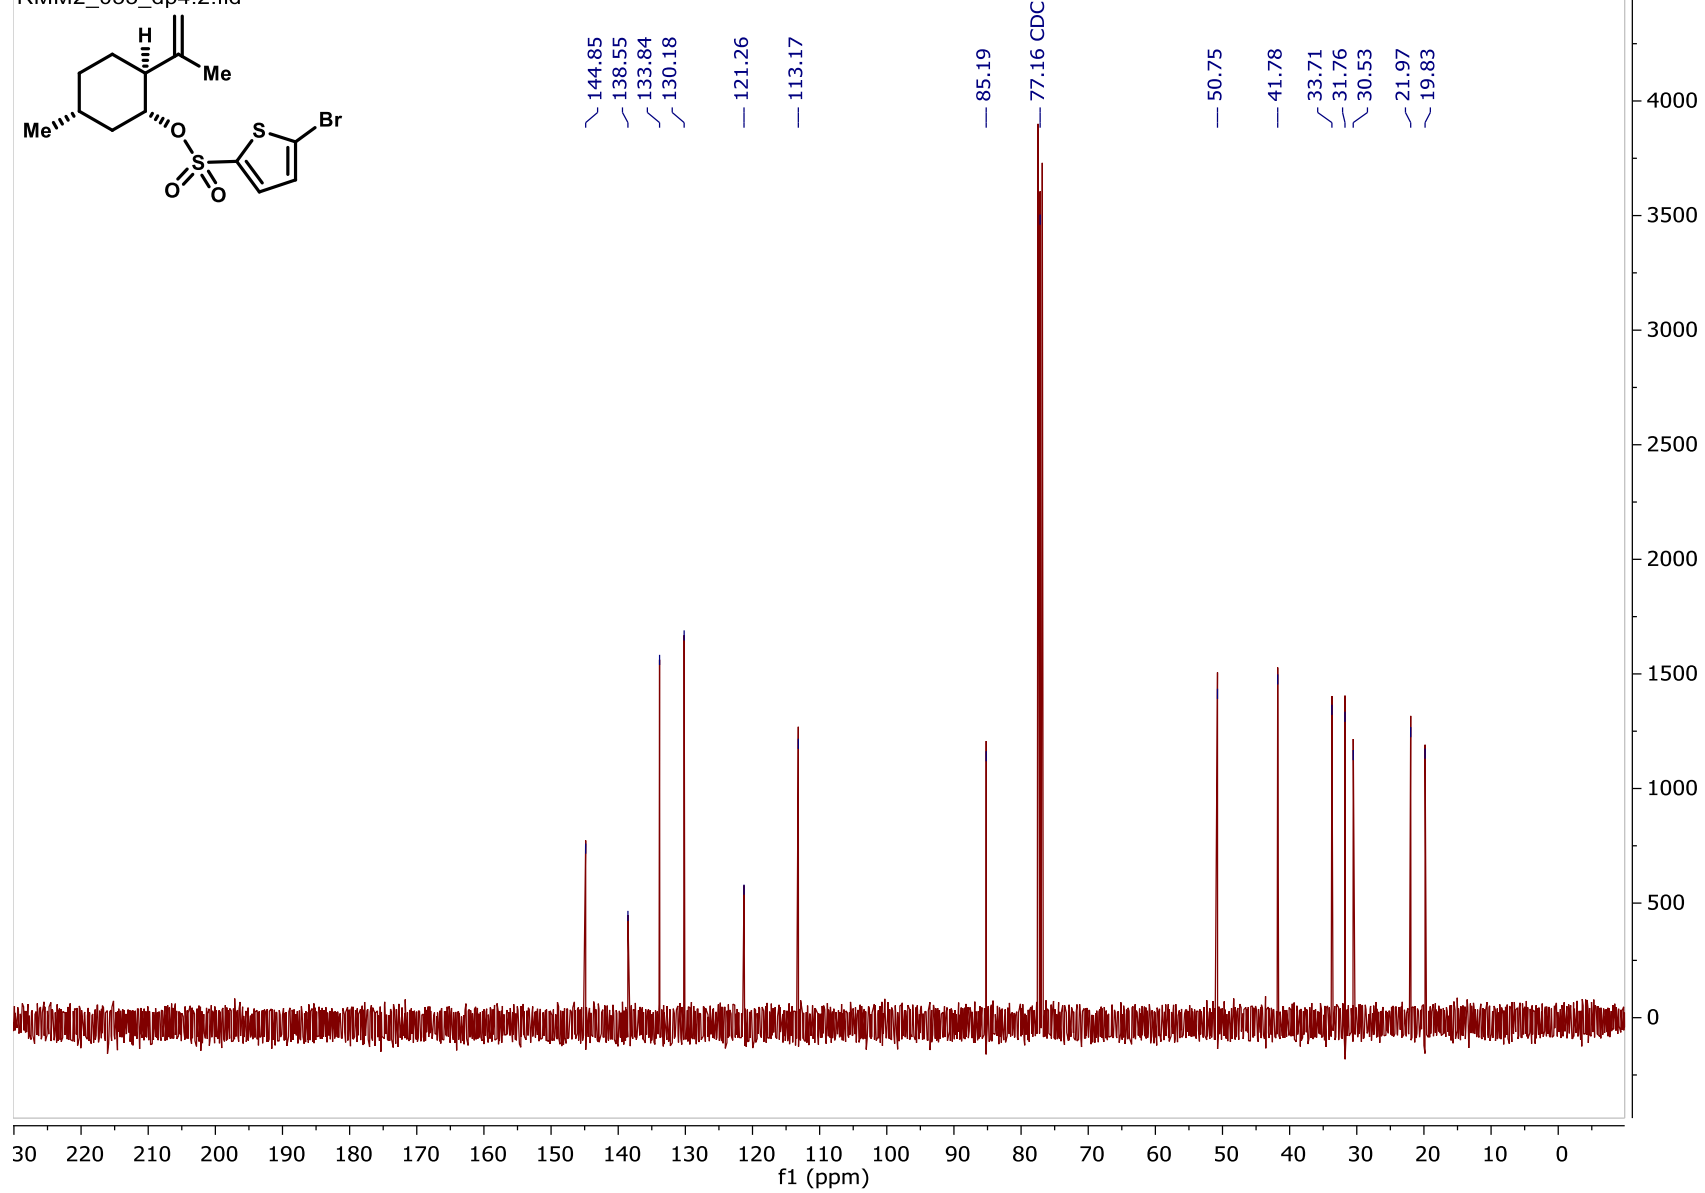

15: <sup>1</sup>H-NMR (400 MHz, CDCl<sub>3</sub>)

PM2\_042\_d4.1.fid

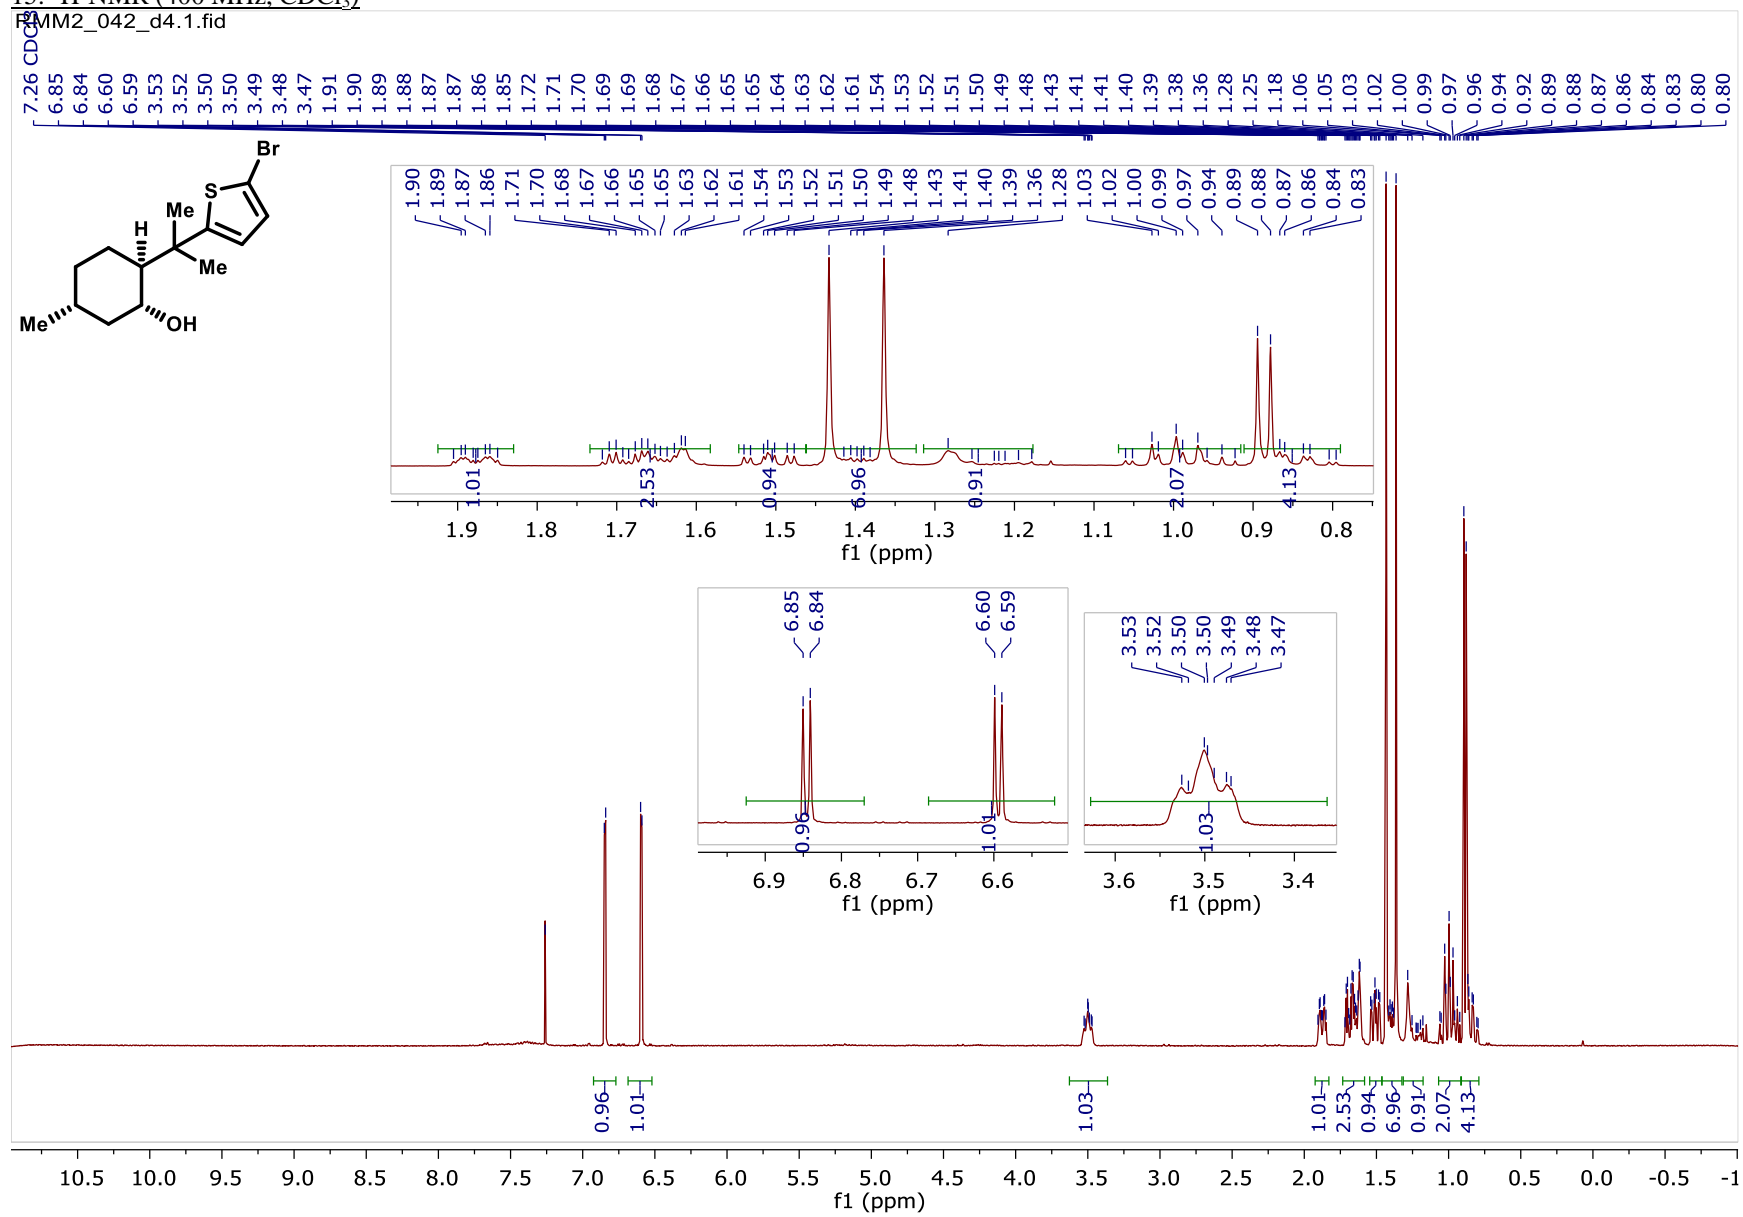



15:  $^{13}\text{C}$ -NMR (101 MHz,  $\text{CDCl}_3$ )

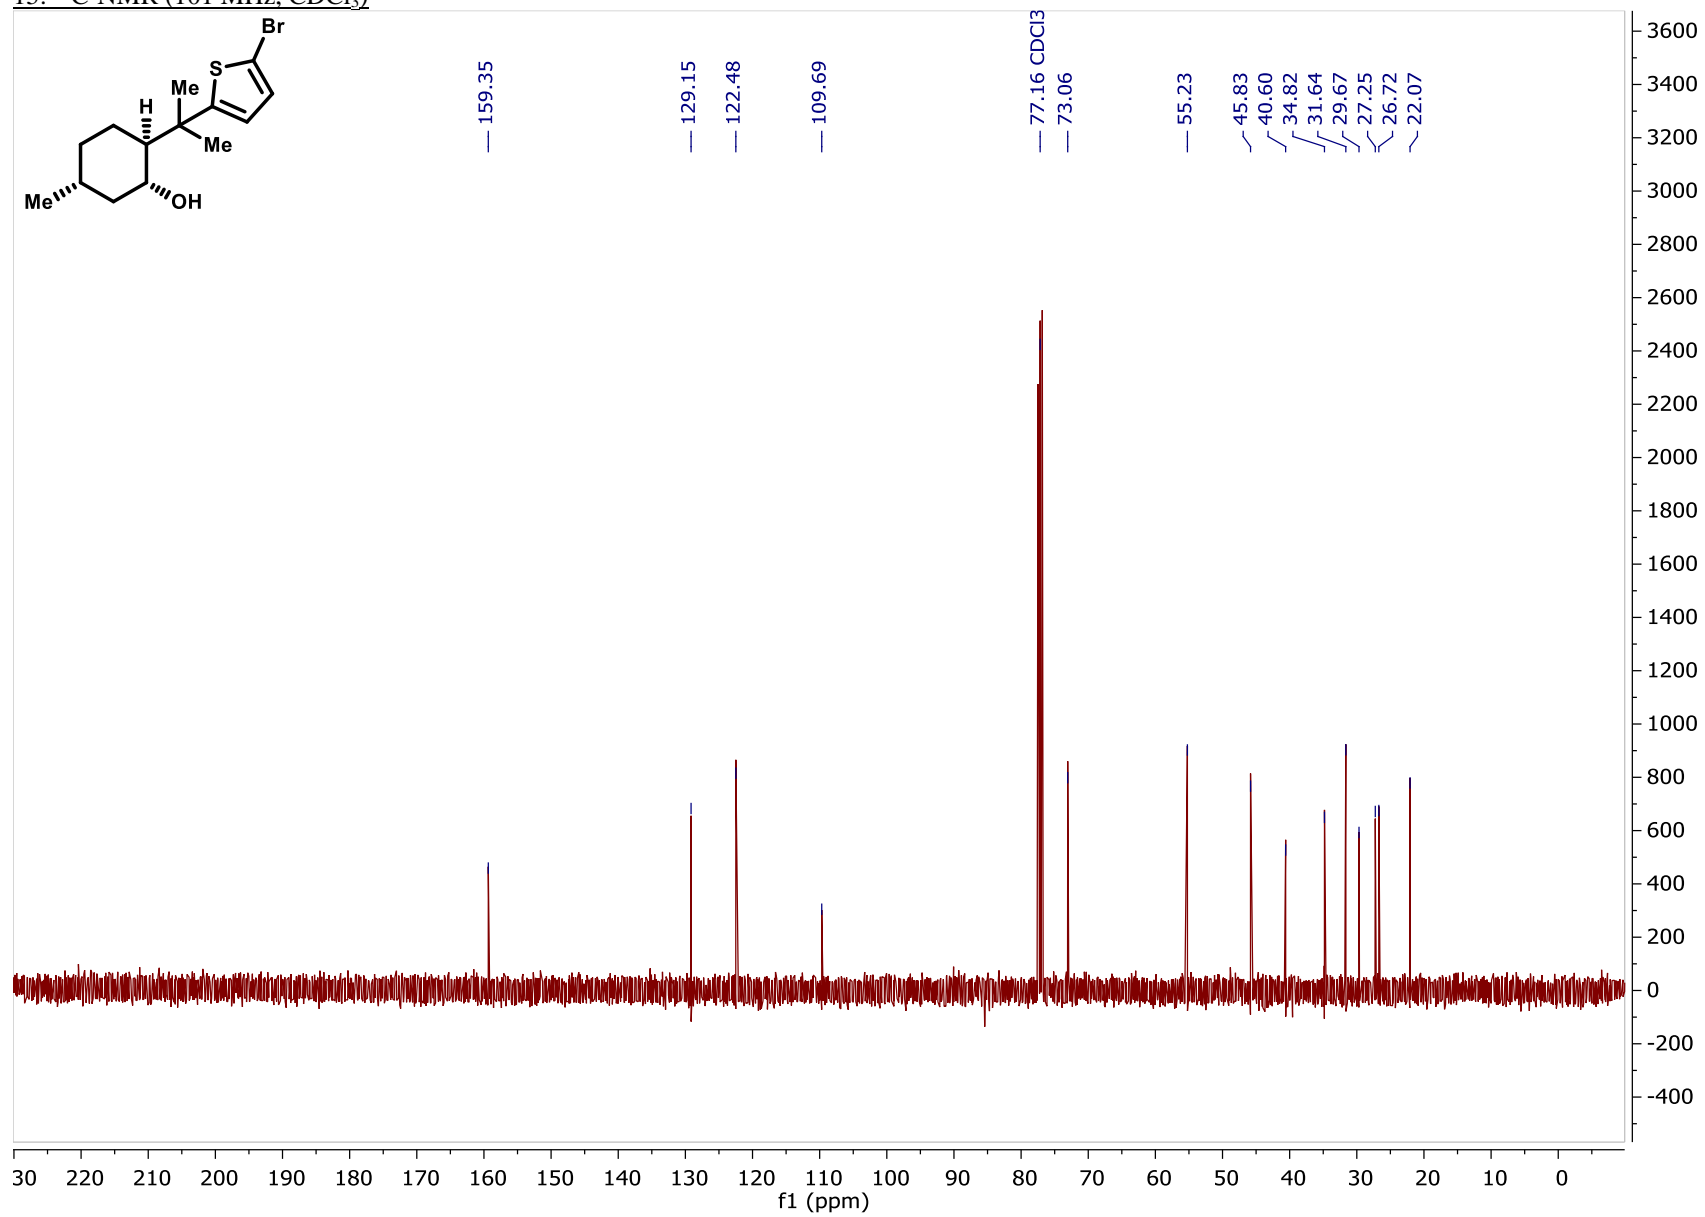

SI-18:  $^1\text{H}$ -NMR (600 MHz,  $\text{CDCl}_3$ )

RMM2\_0224\_2\_av6c.1.fid

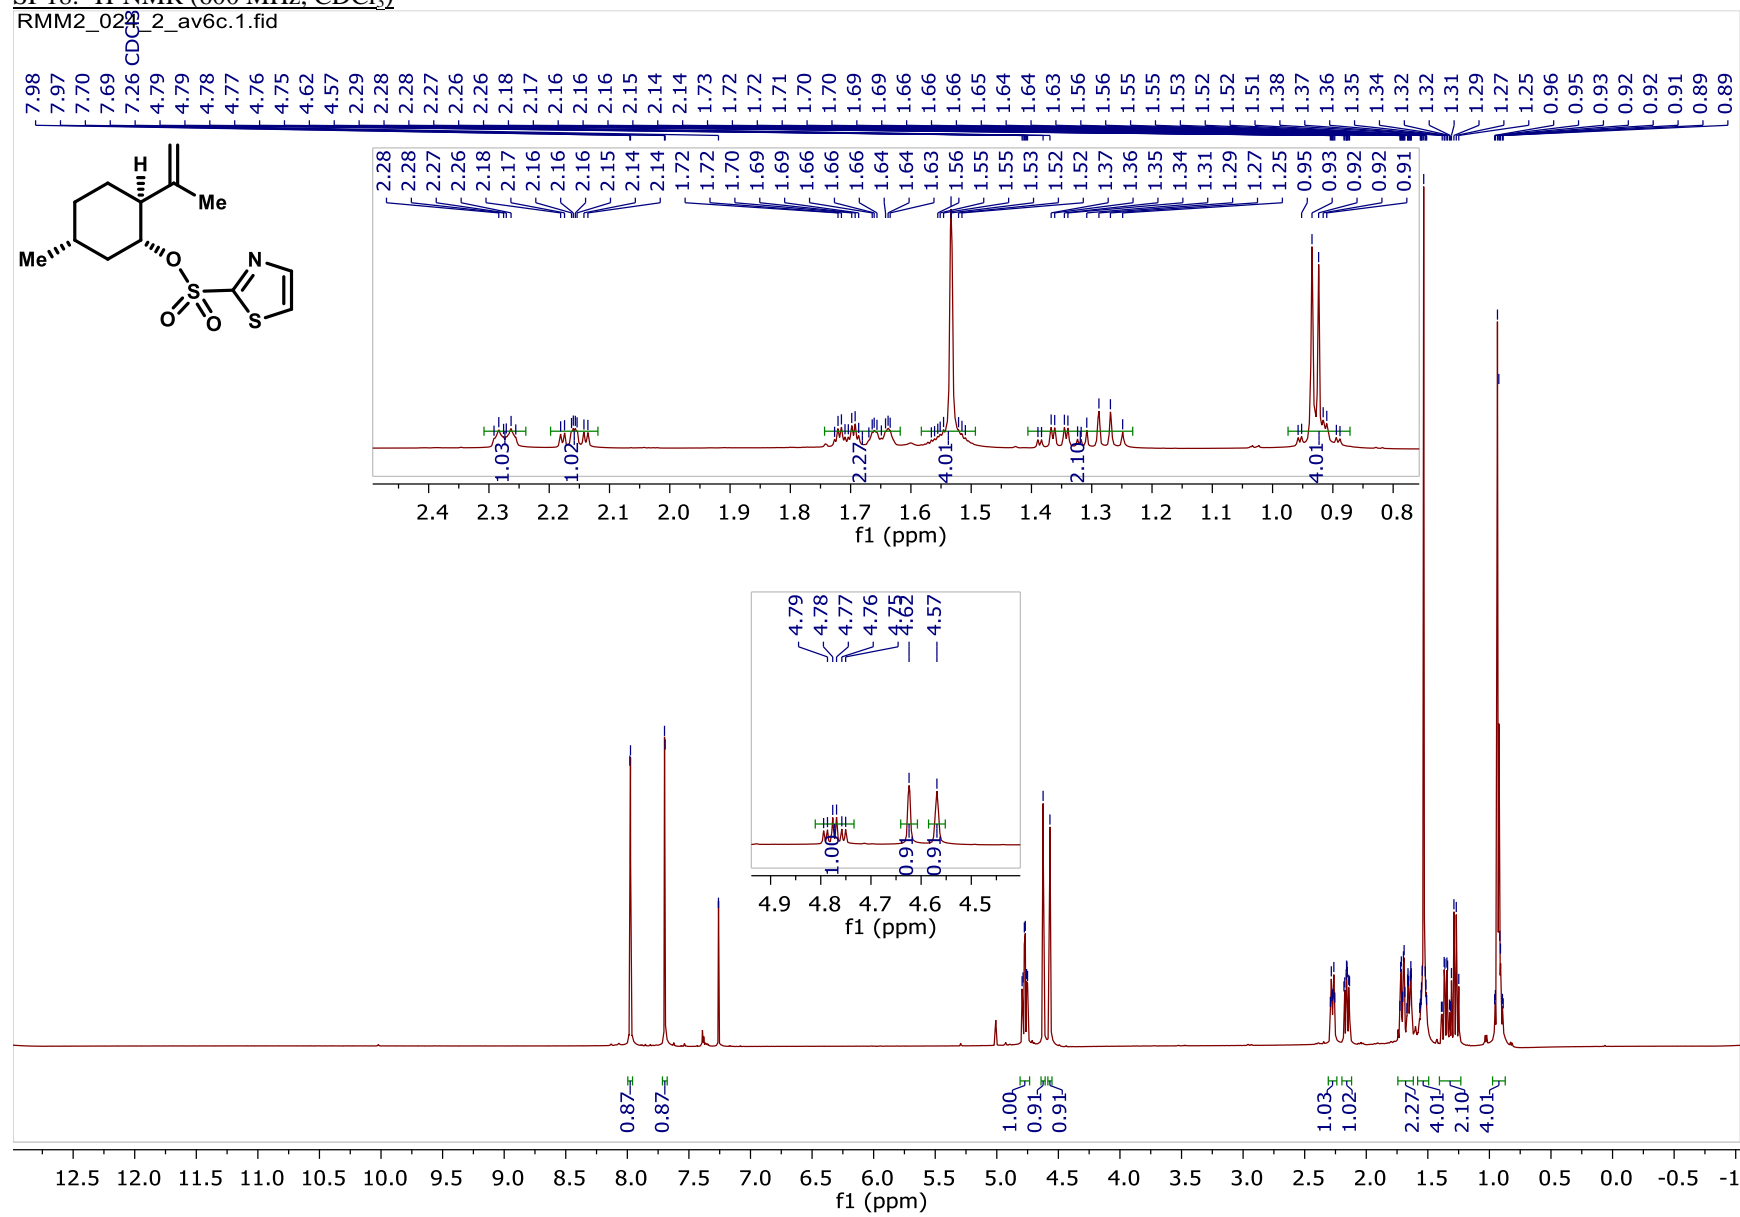

RMM2\_024\_2\_av6c.1.fid

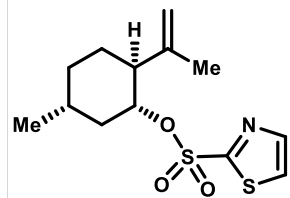

— 7.26 CDCl<sub>3</sub>

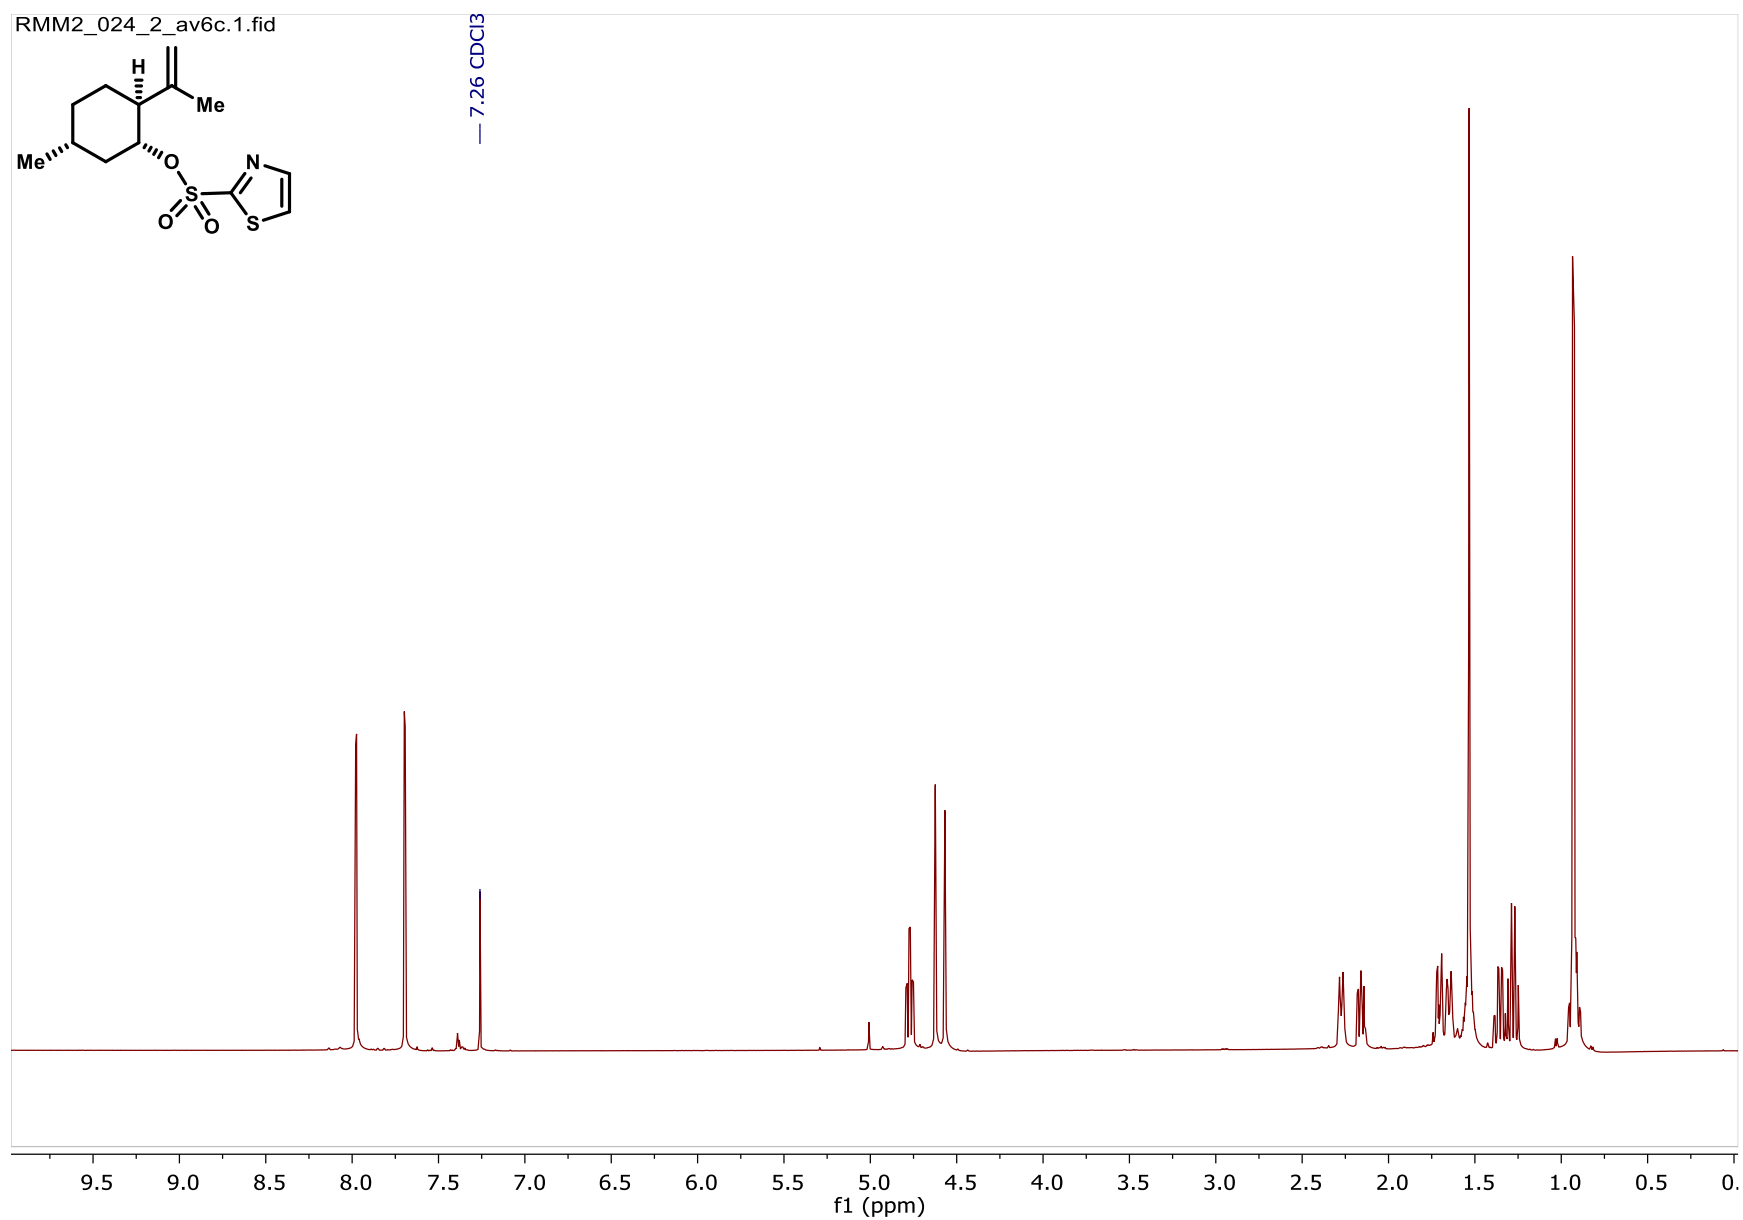

SI-18:  $^{13}\text{C}$ -NMR (151 MHz,  $\text{CDCl}_3$ )

RMM2\_024\_2\_av6c.2.fid

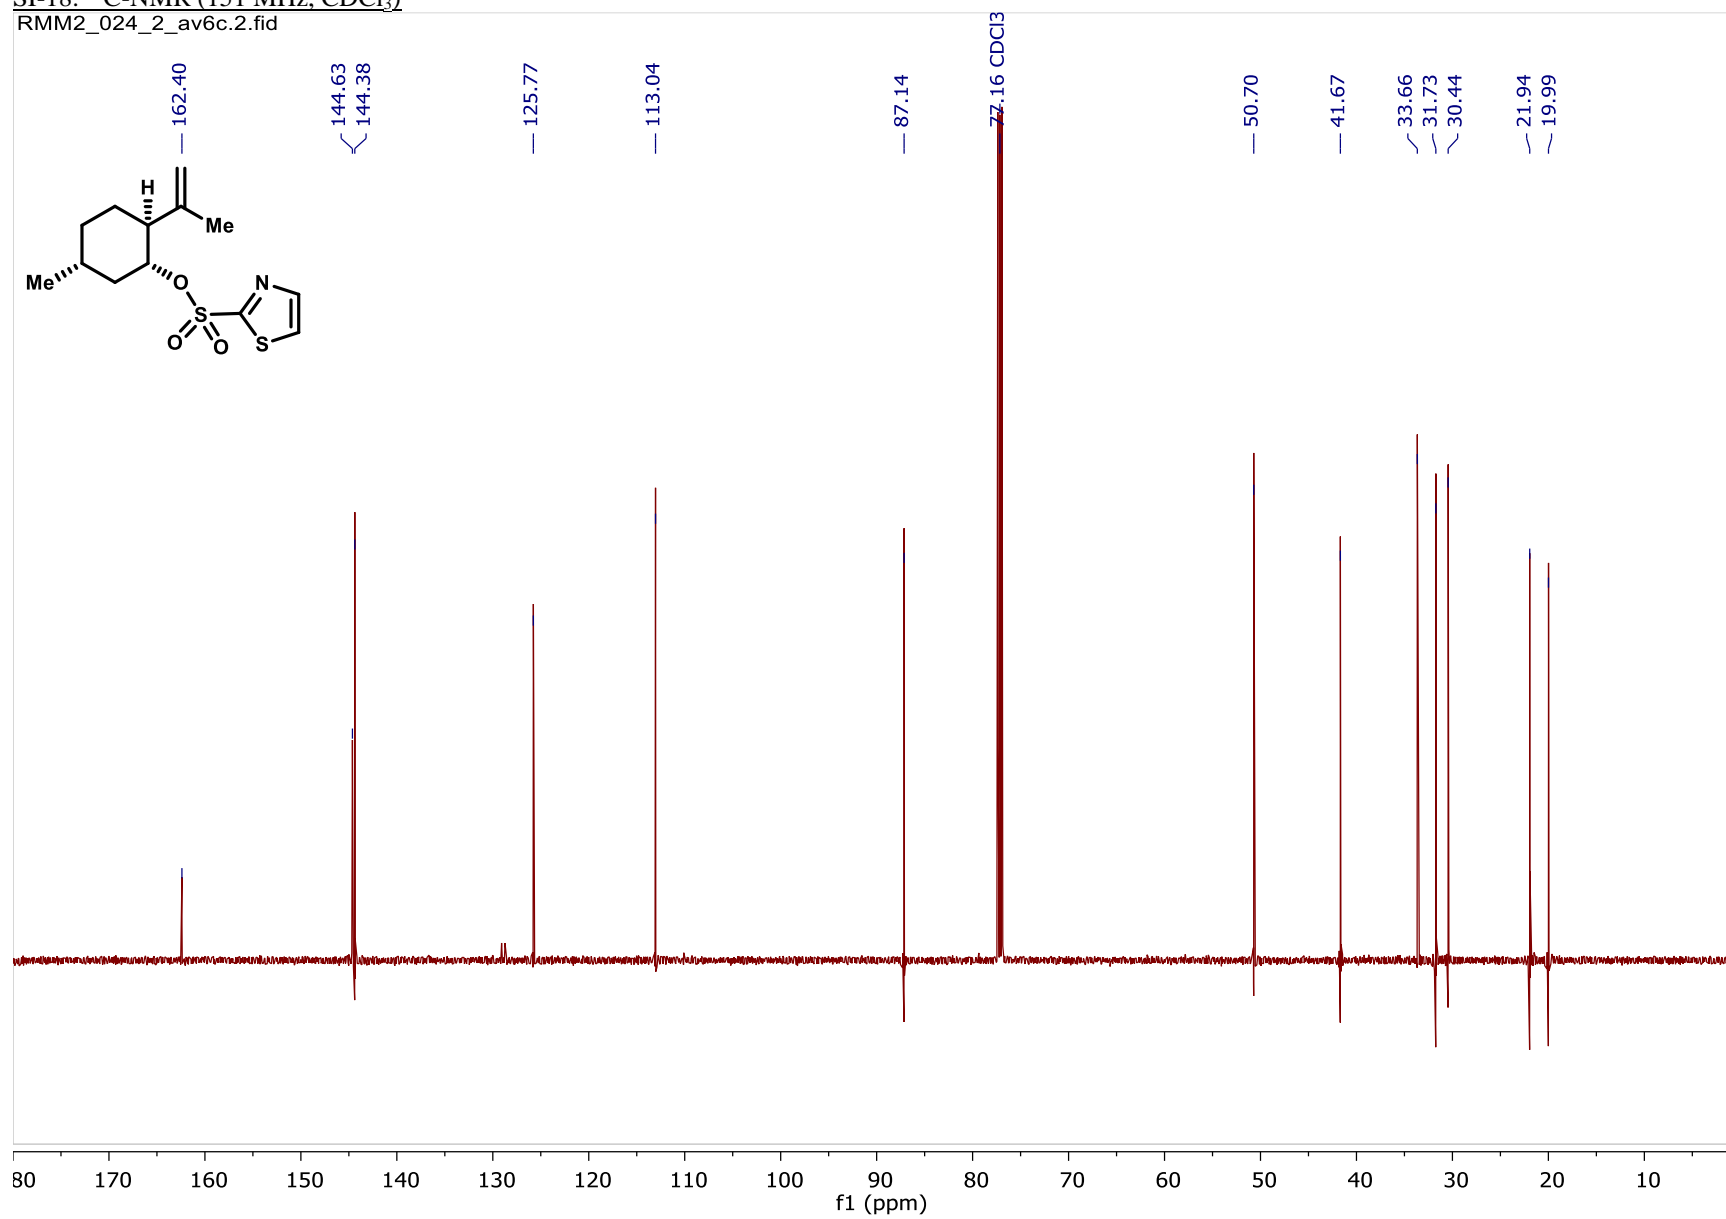

RMM2\_050\_final\_a6c.1.fid

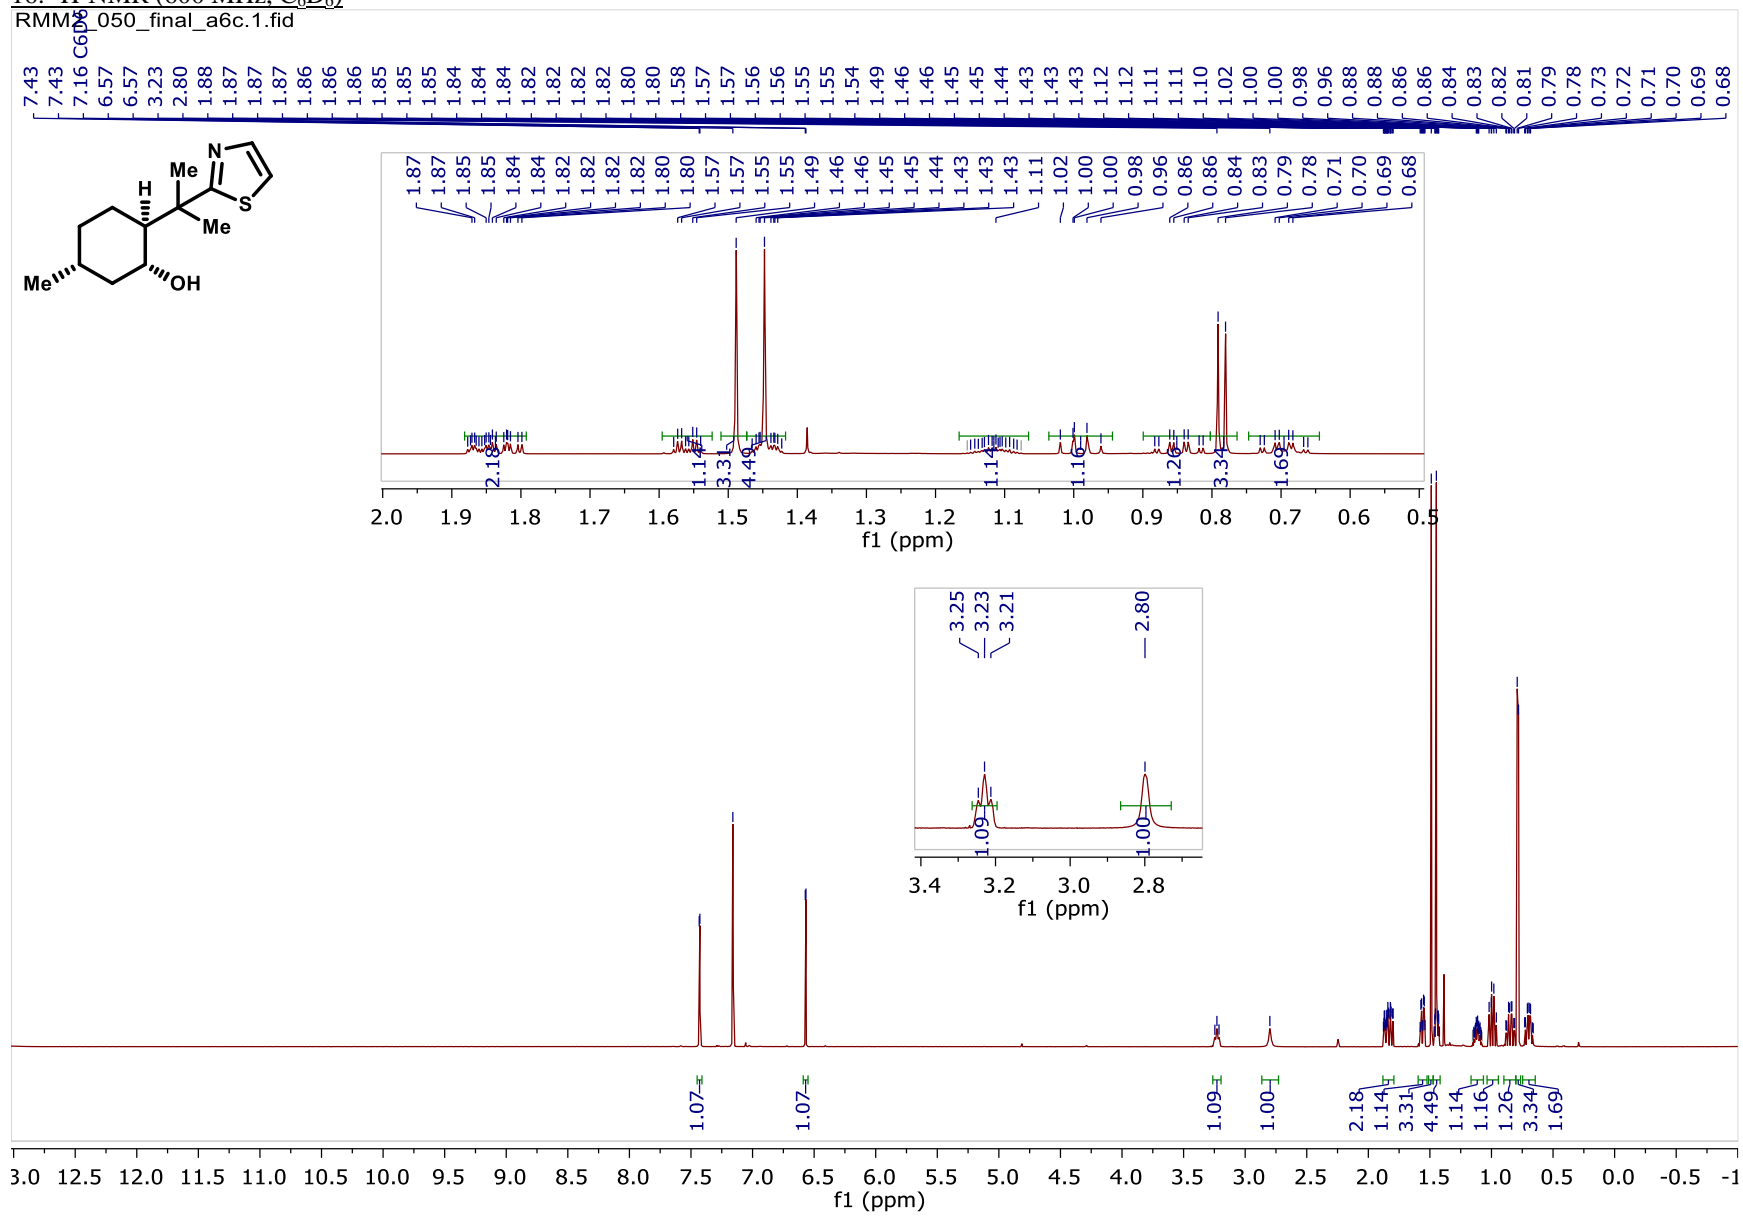



RMM2\_050\_final\_a6c.1.fid

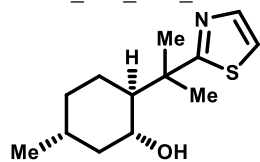

— 7.16 C6D6

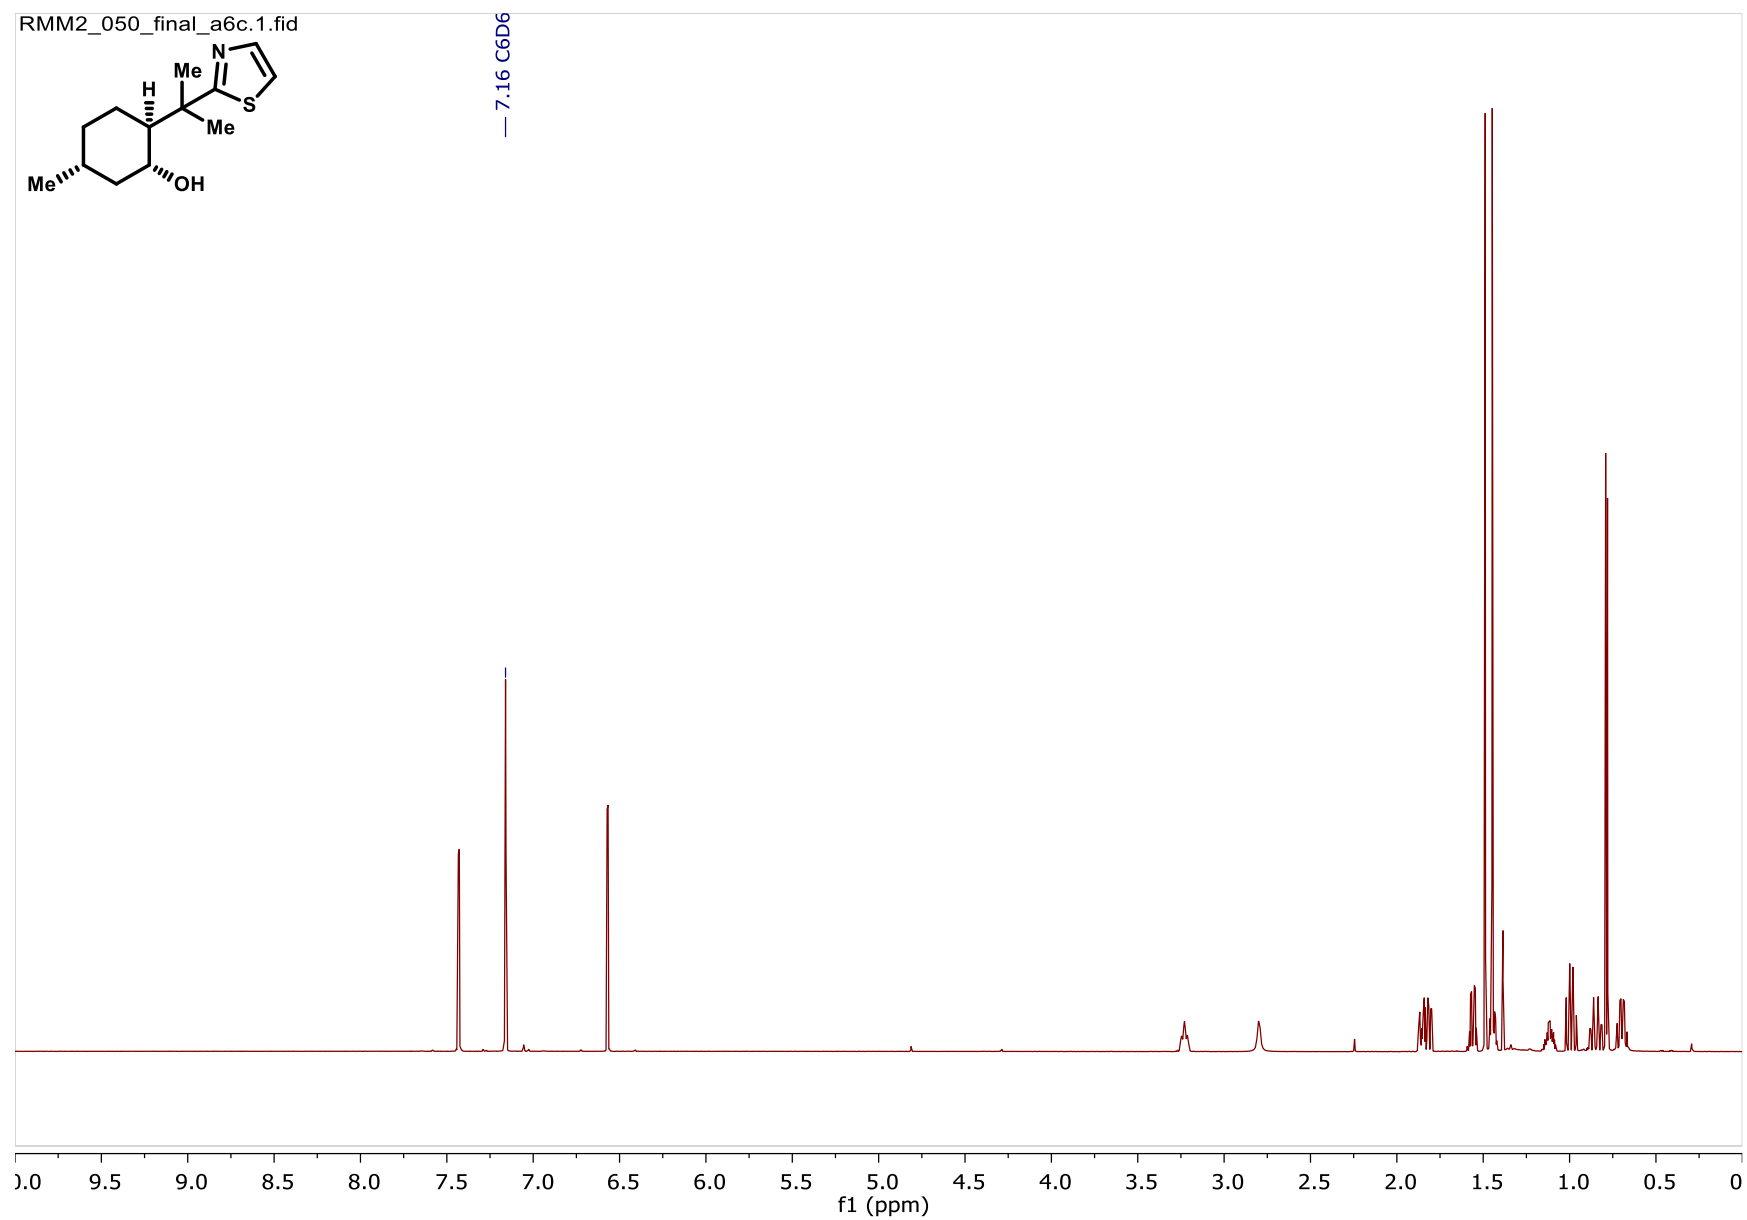

16:  $^{13}\text{C}$ -NMR (151 MHz,  $\text{C}_6\text{D}_6$ )

RMM2\_050\_final\_a6c.2.fid

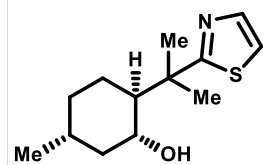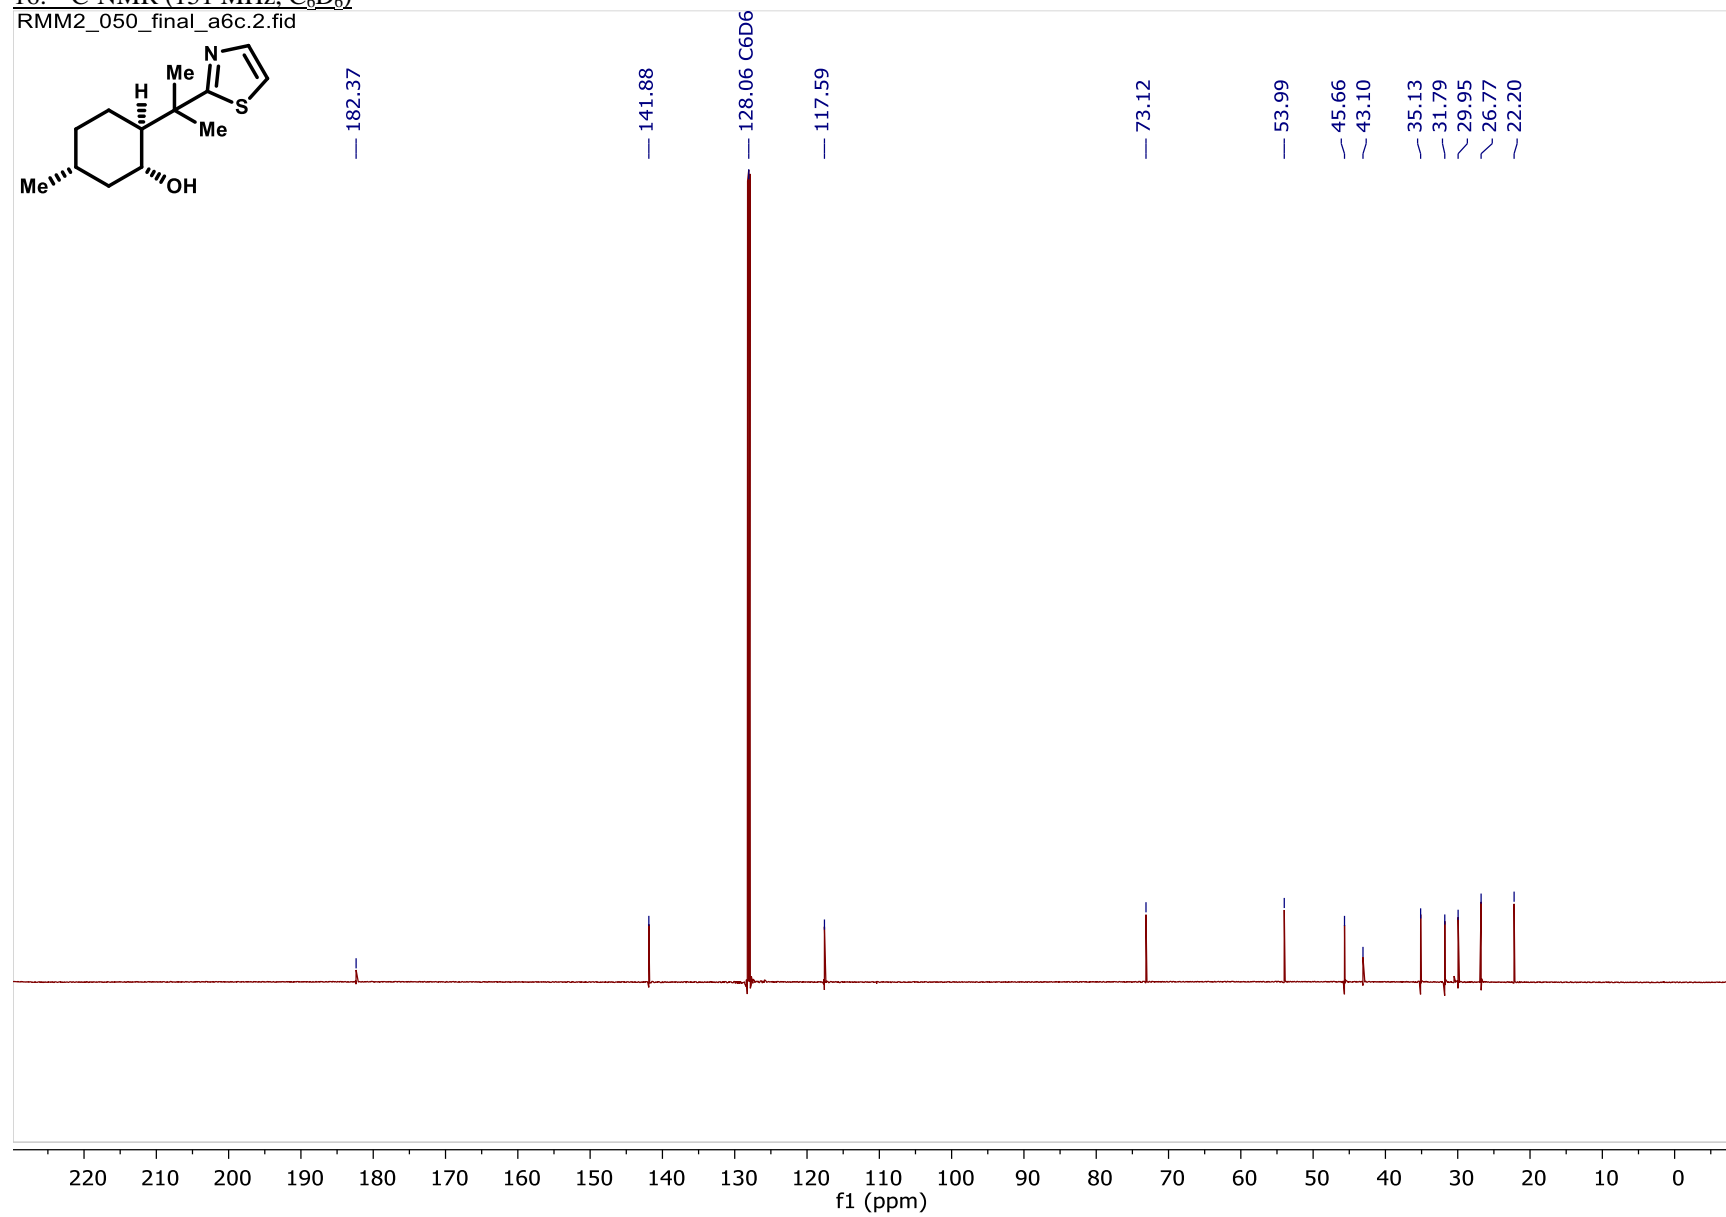

SI-19: <sup>1</sup>H-NMR (600 MHz, CDCl<sub>3</sub>)

RMM2\_031\_2\_a62.1.fid

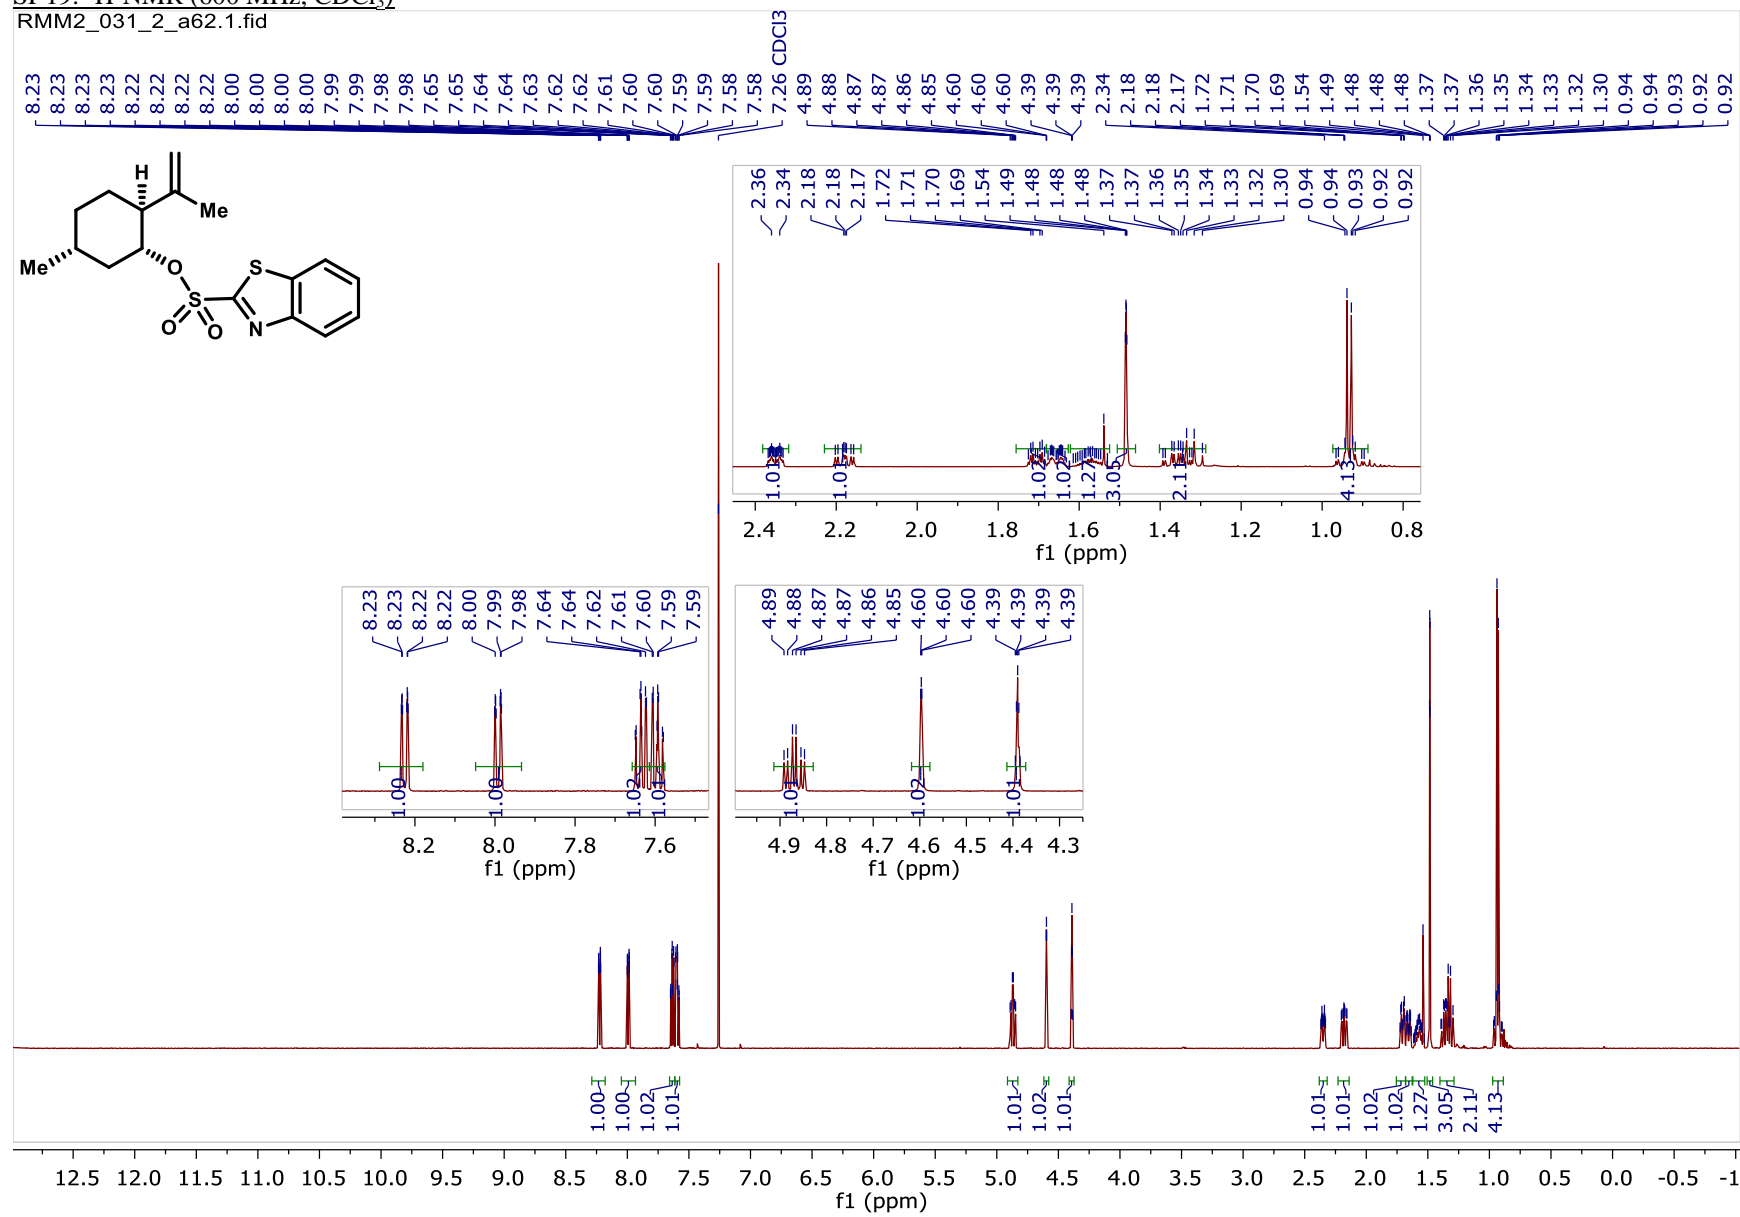

RMM2\_031\_2\_a62.1.fid

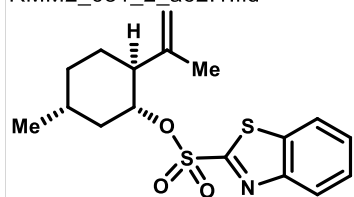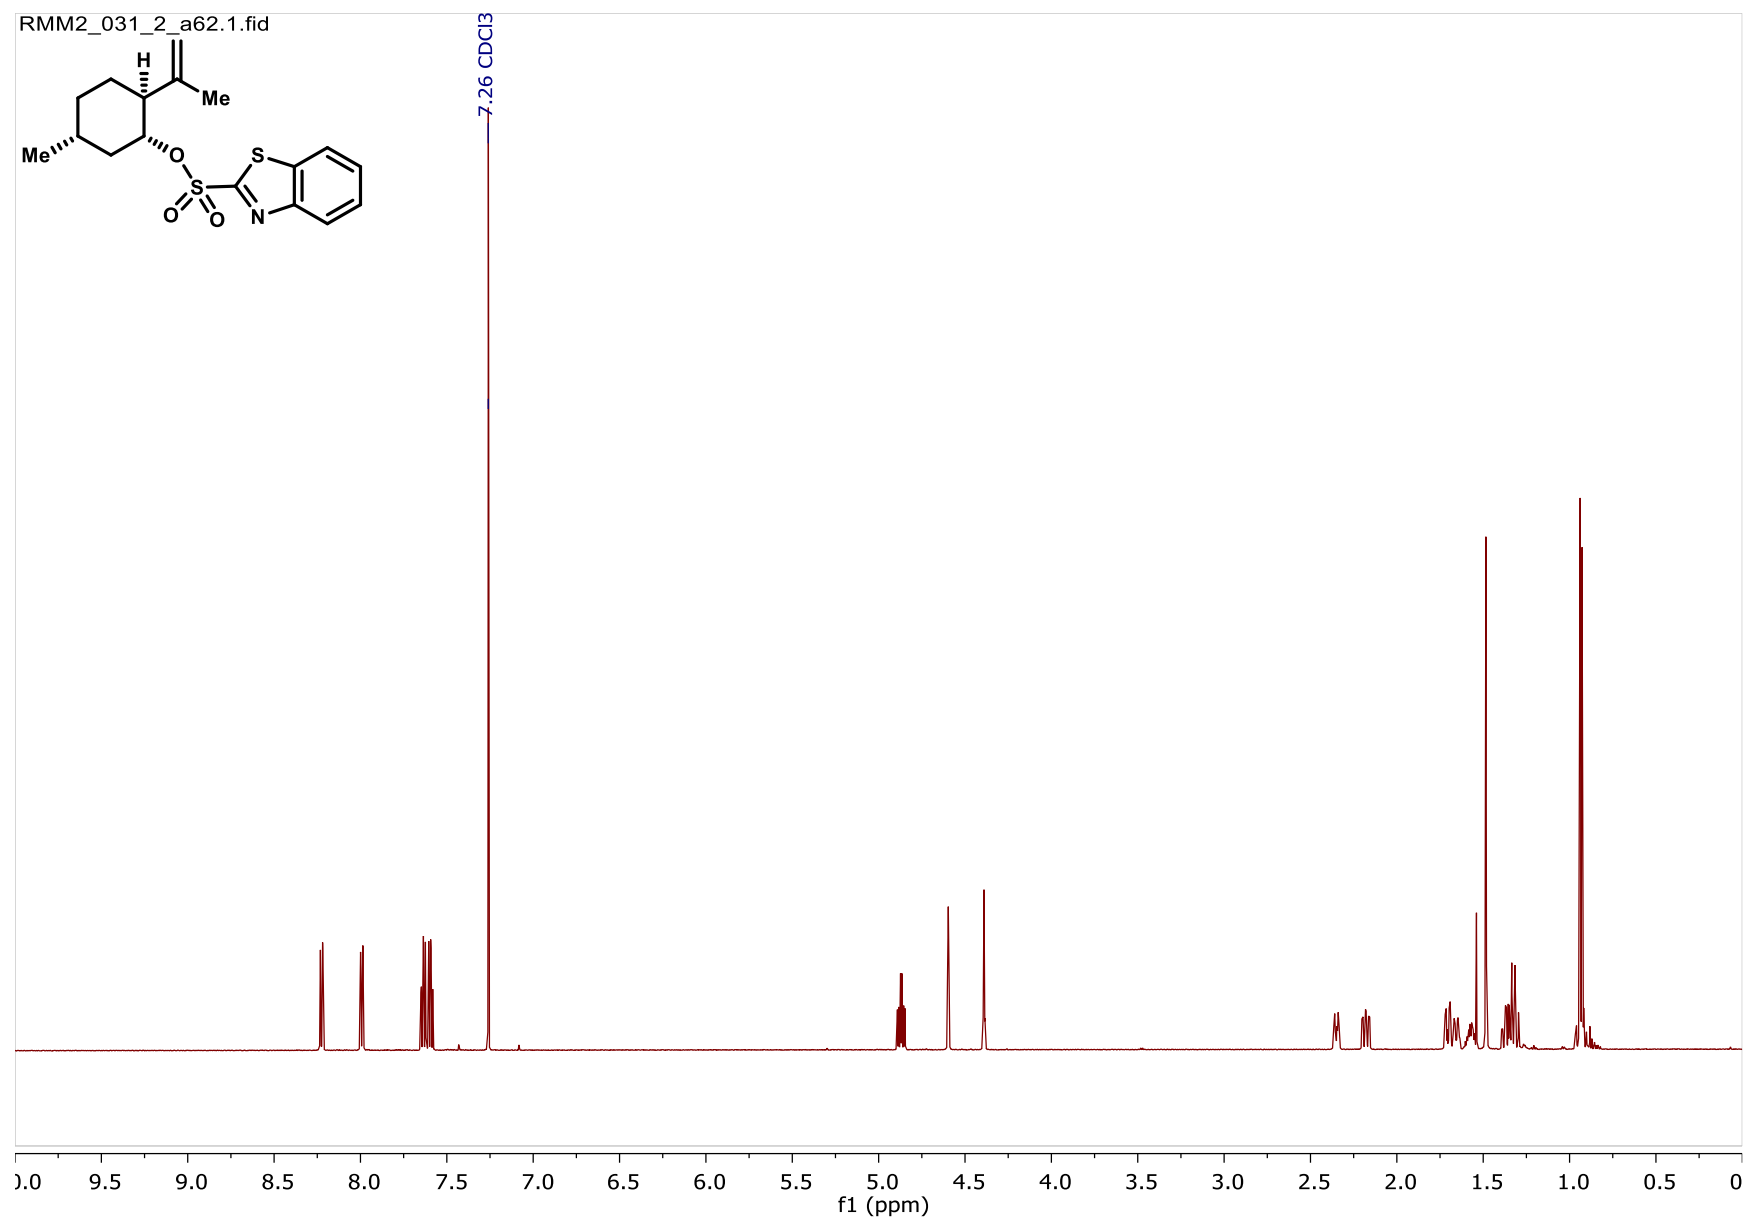

SI-19:  $^{13}\text{C}$ -NMR (151 MHz,  $\text{CDCl}_3$ )

RMM2\_031\_2\_a6.3.fid

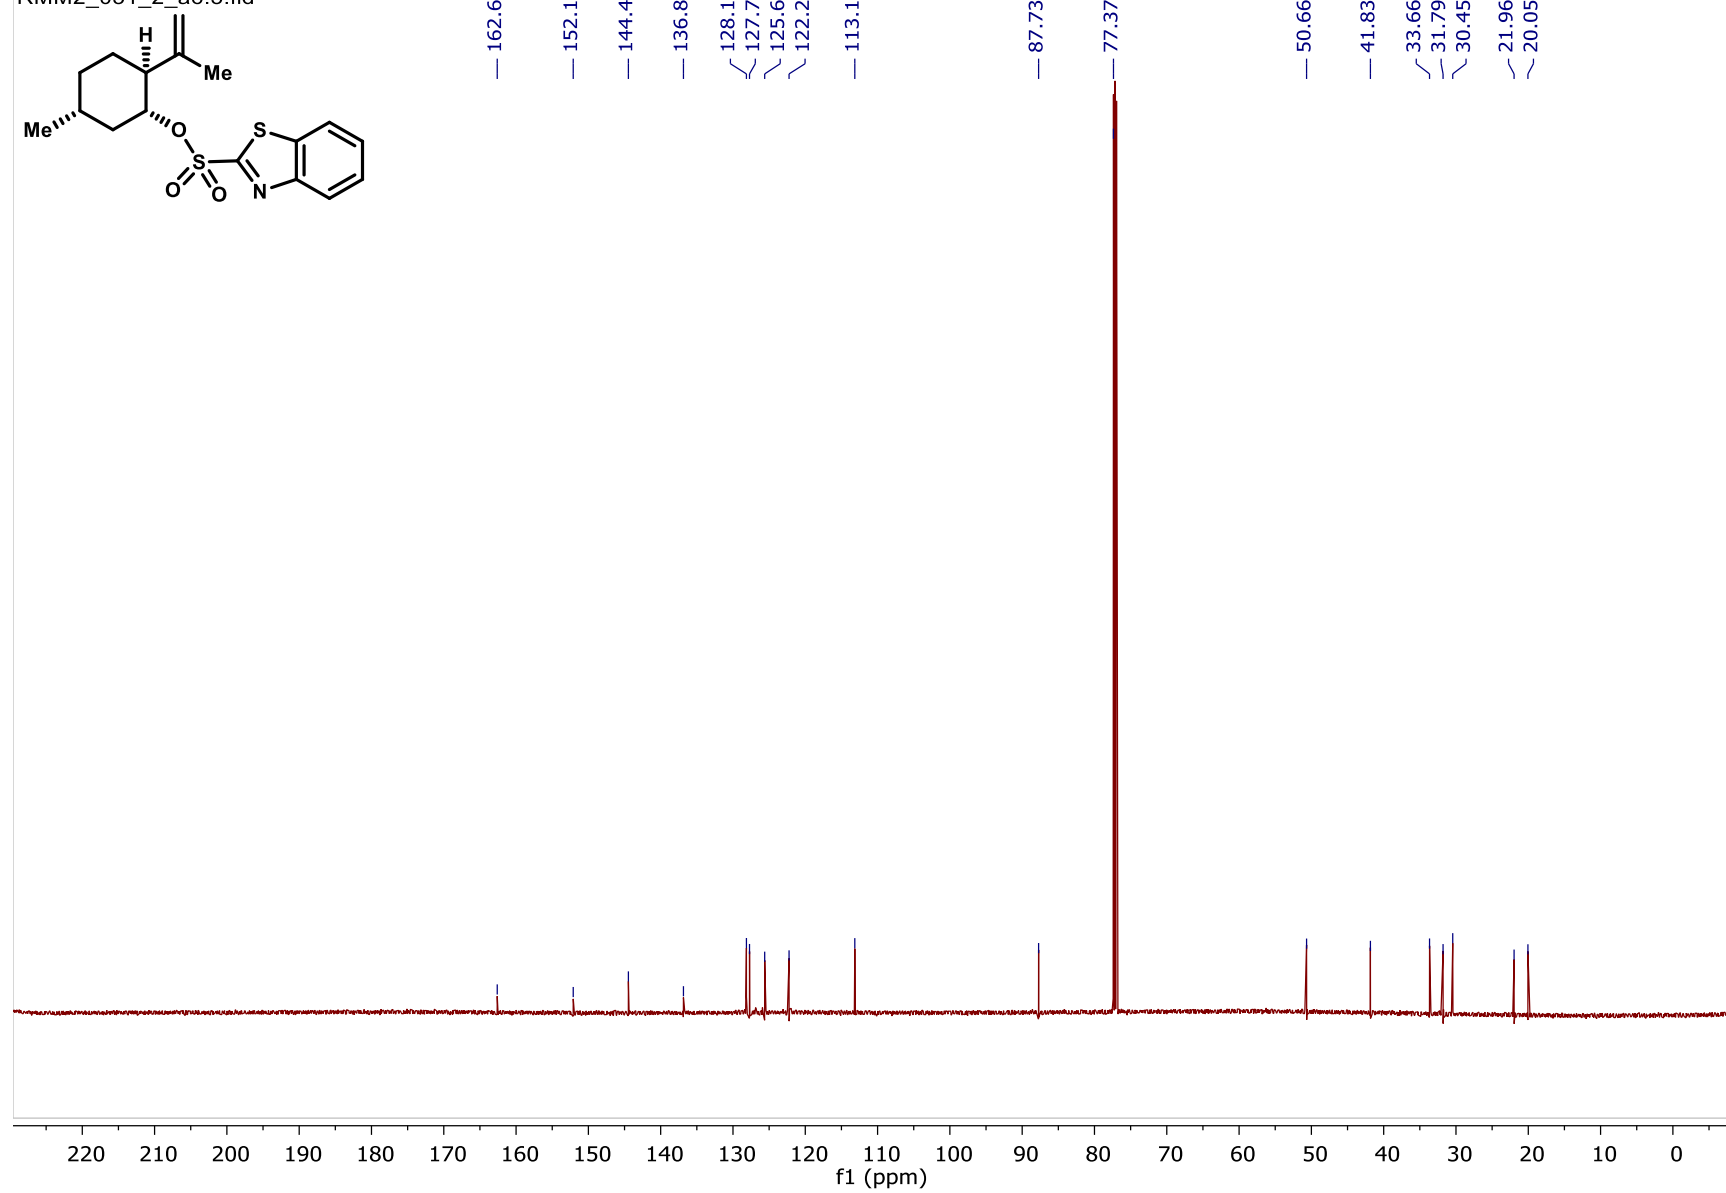

17: <sup>1</sup>H-NMR (600 MHz, CDCl<sub>3</sub>)

RMM2\_41\_2.1.fid

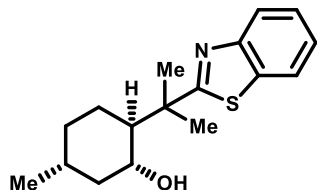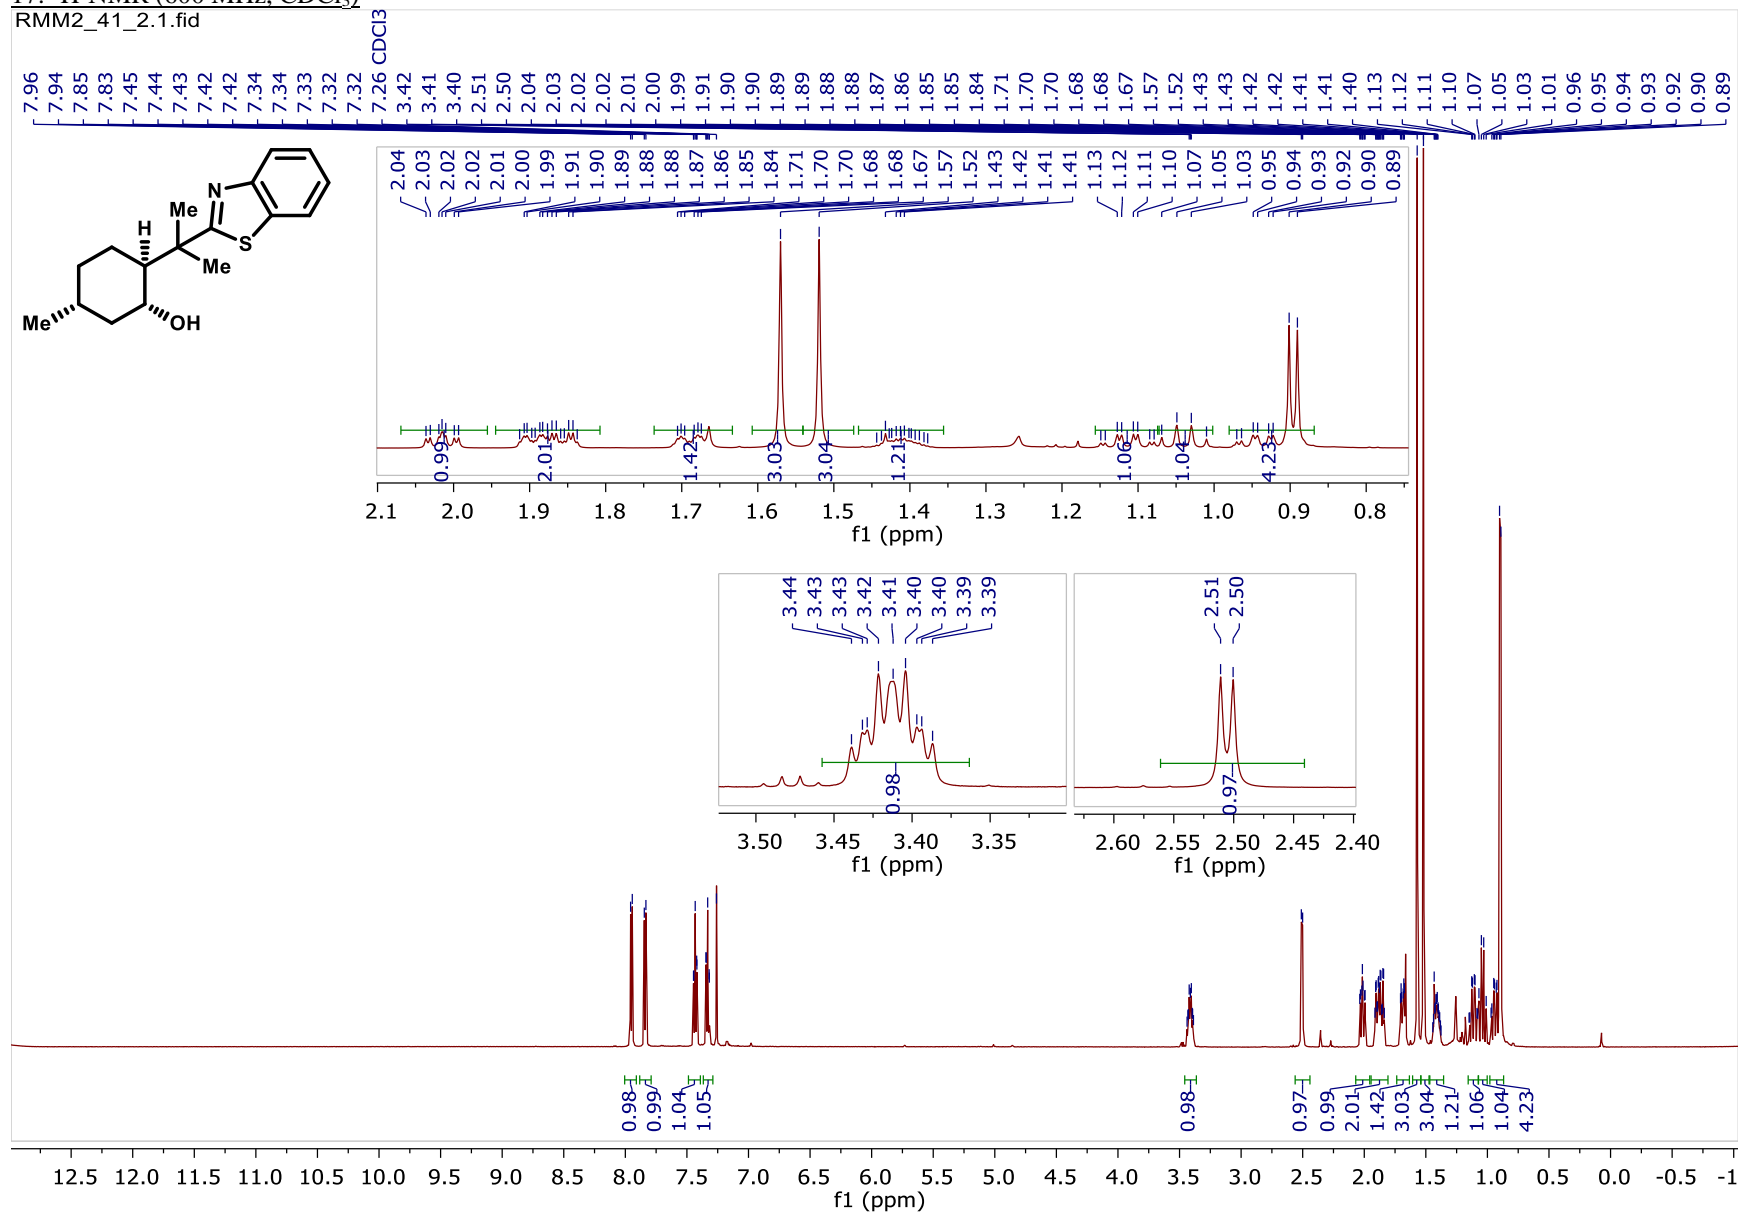

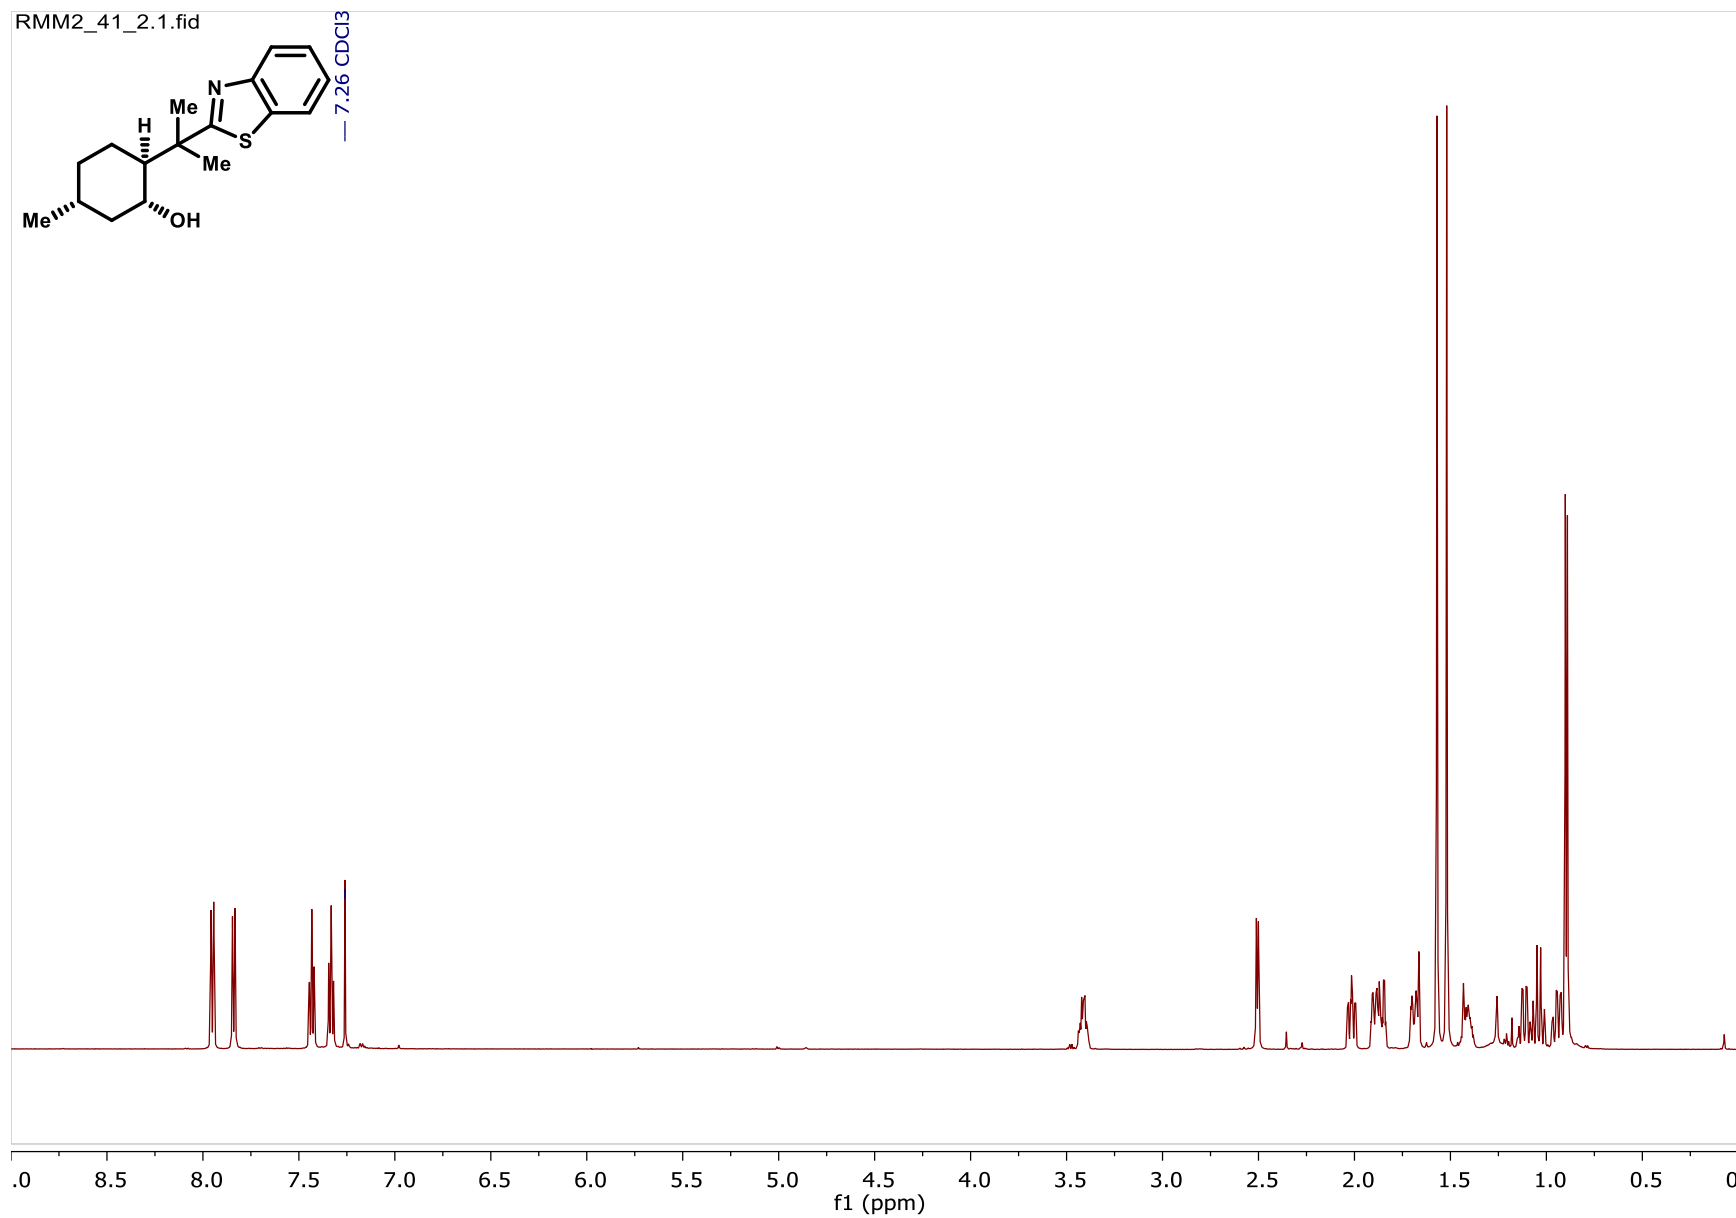

17:  $^{13}\text{C}$ -NMR (151 MHz,  $\text{CDCl}_3$ )

RMM2\_41\_2.2.fid

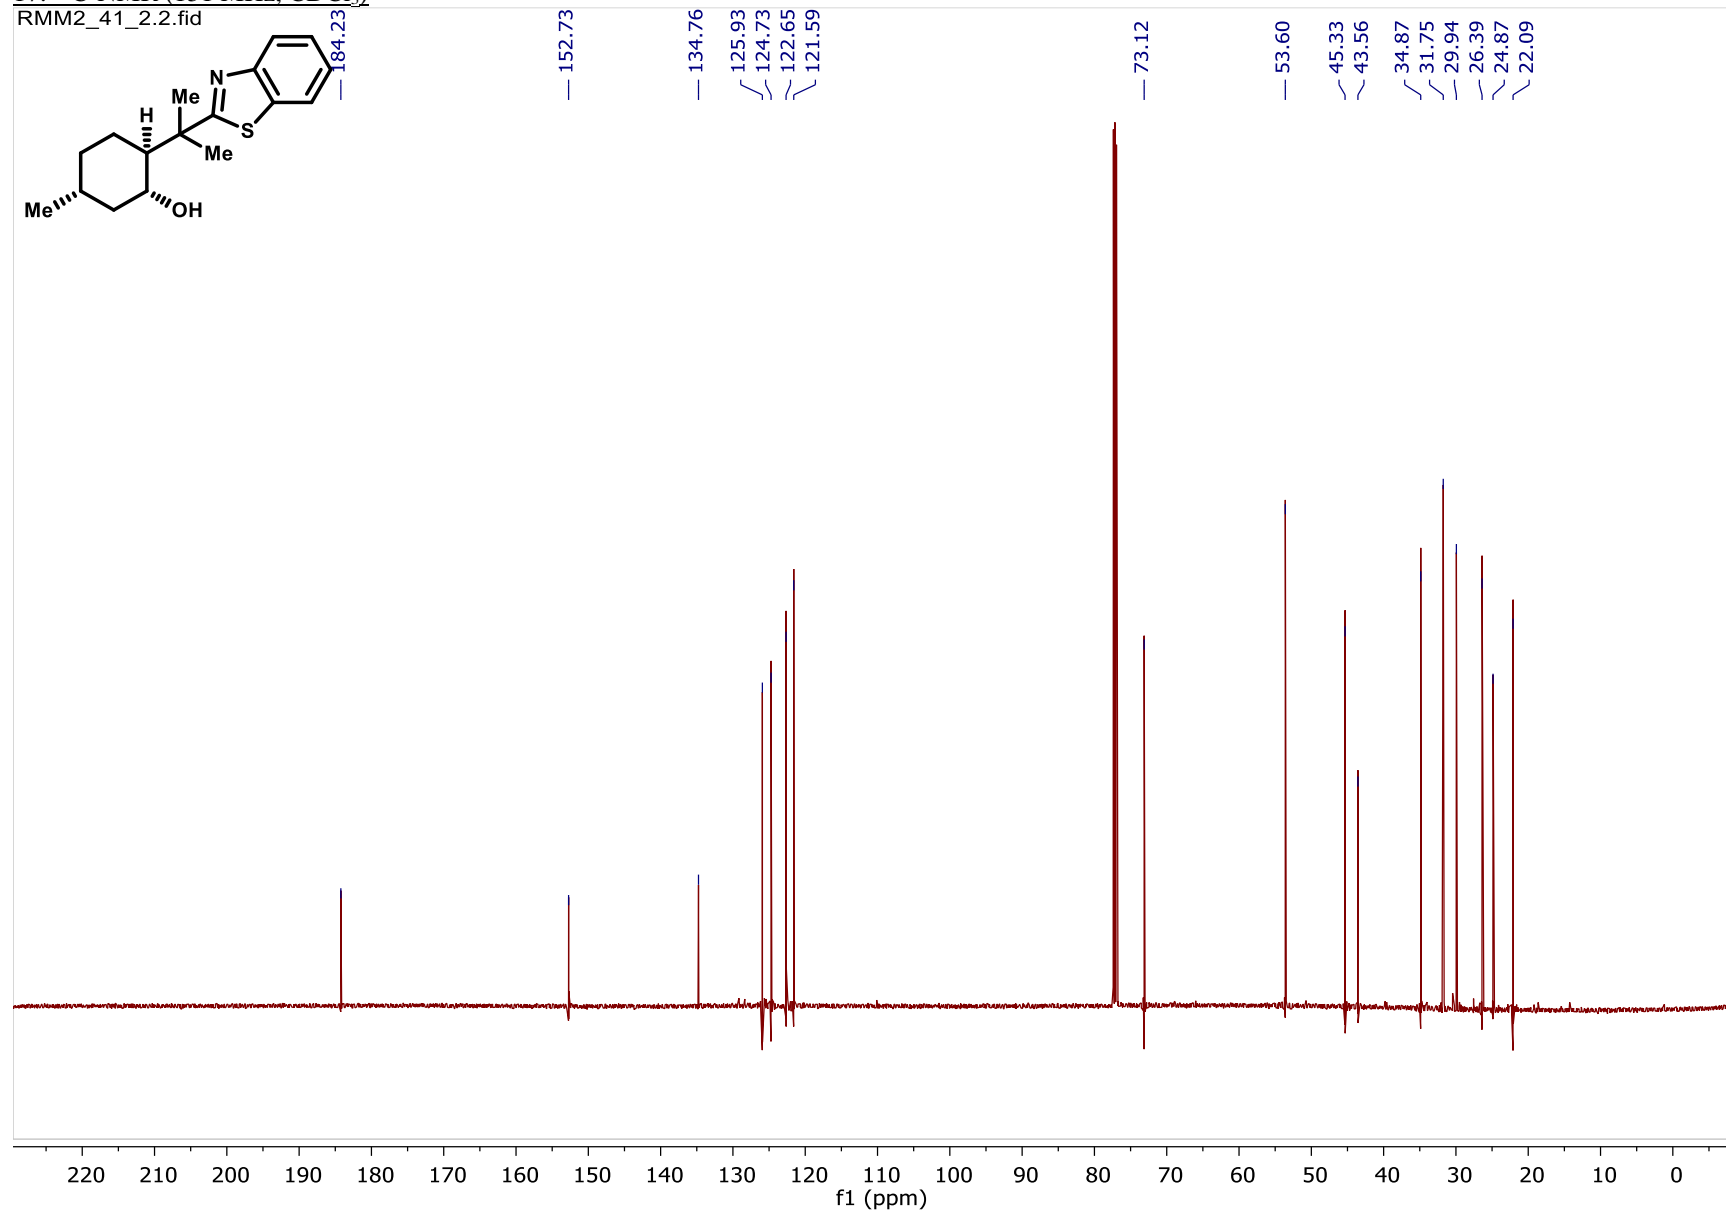



SI-20:  $^1\text{H}$ -NMR (400 MHz,  $\text{CDCl}_3$ )

RMM2\_036\_dp4.1.f03

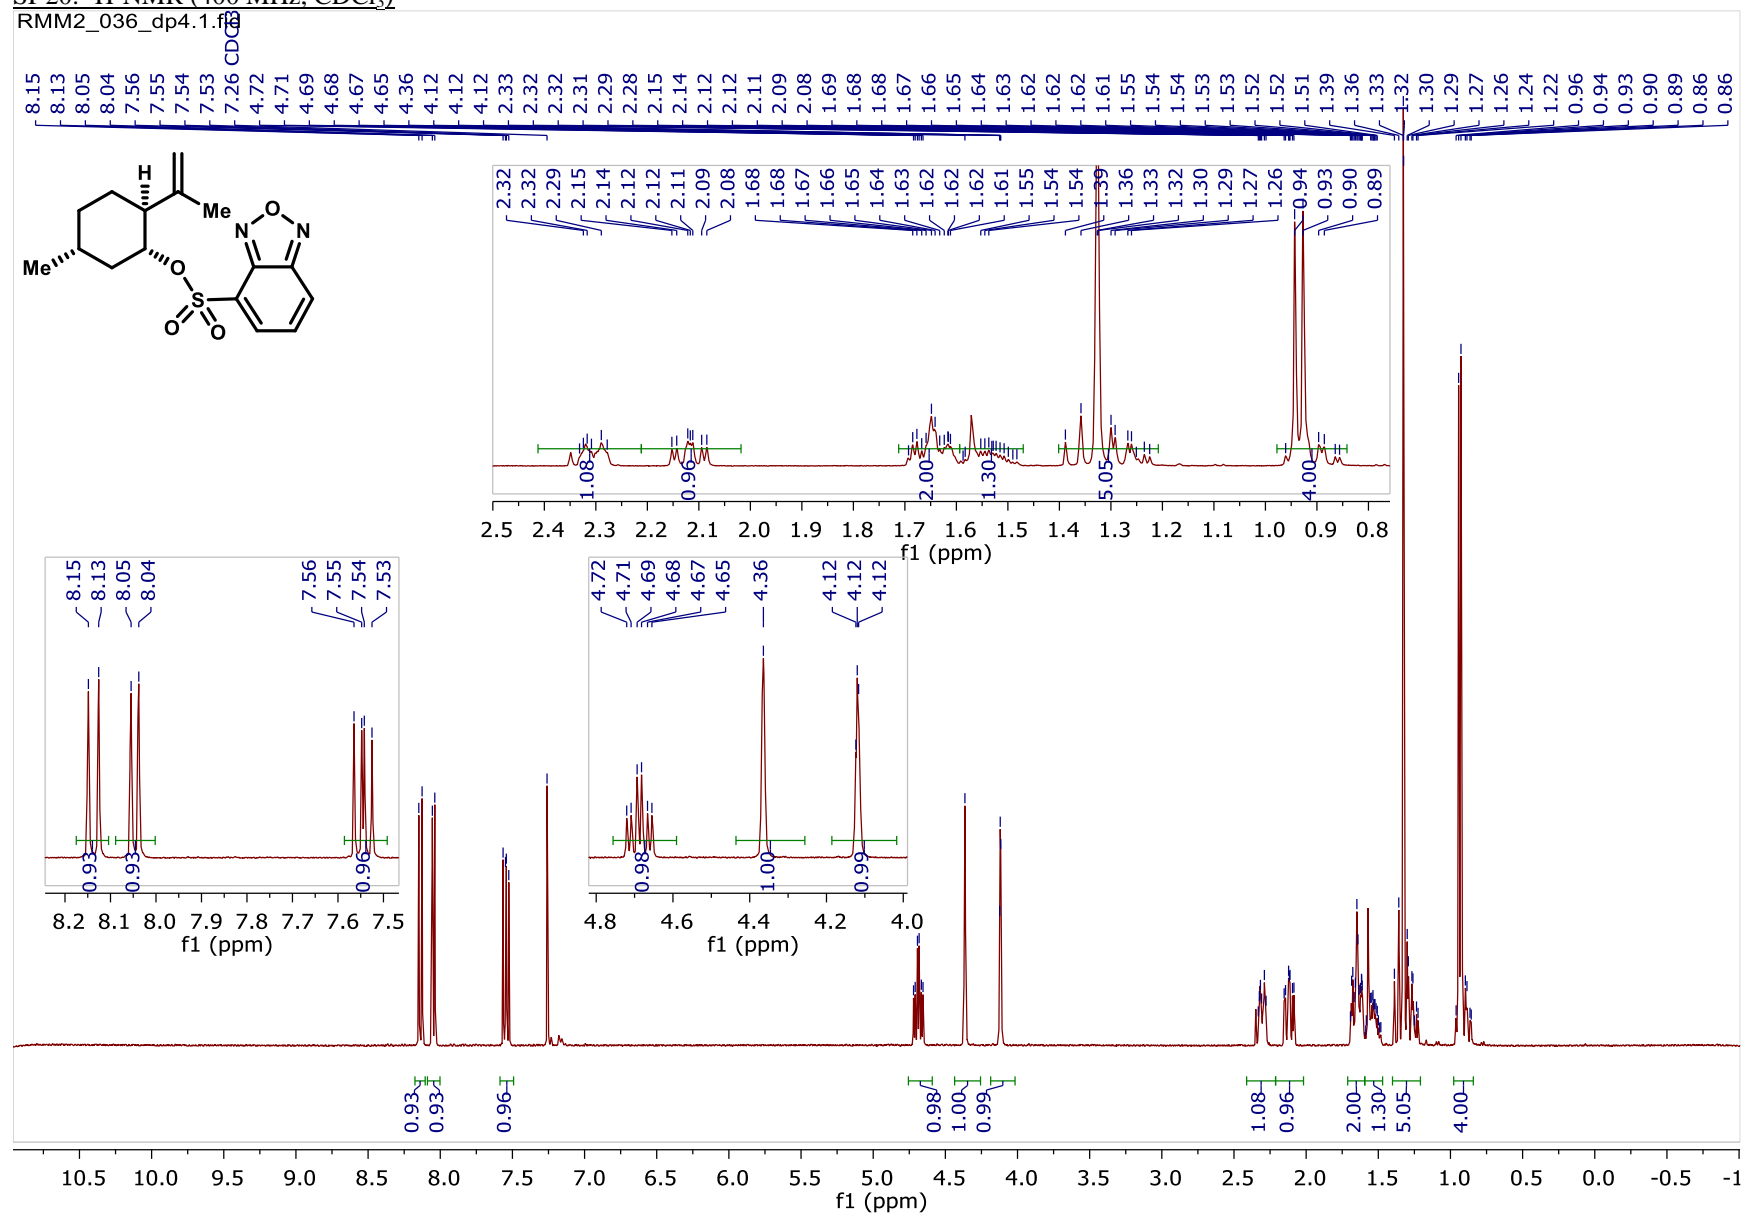

RMM2\_036\_dp4.1.fid

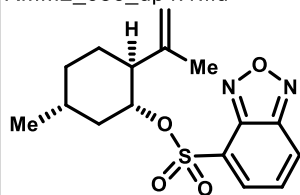

— 7.26 CDCl<sub>3</sub>

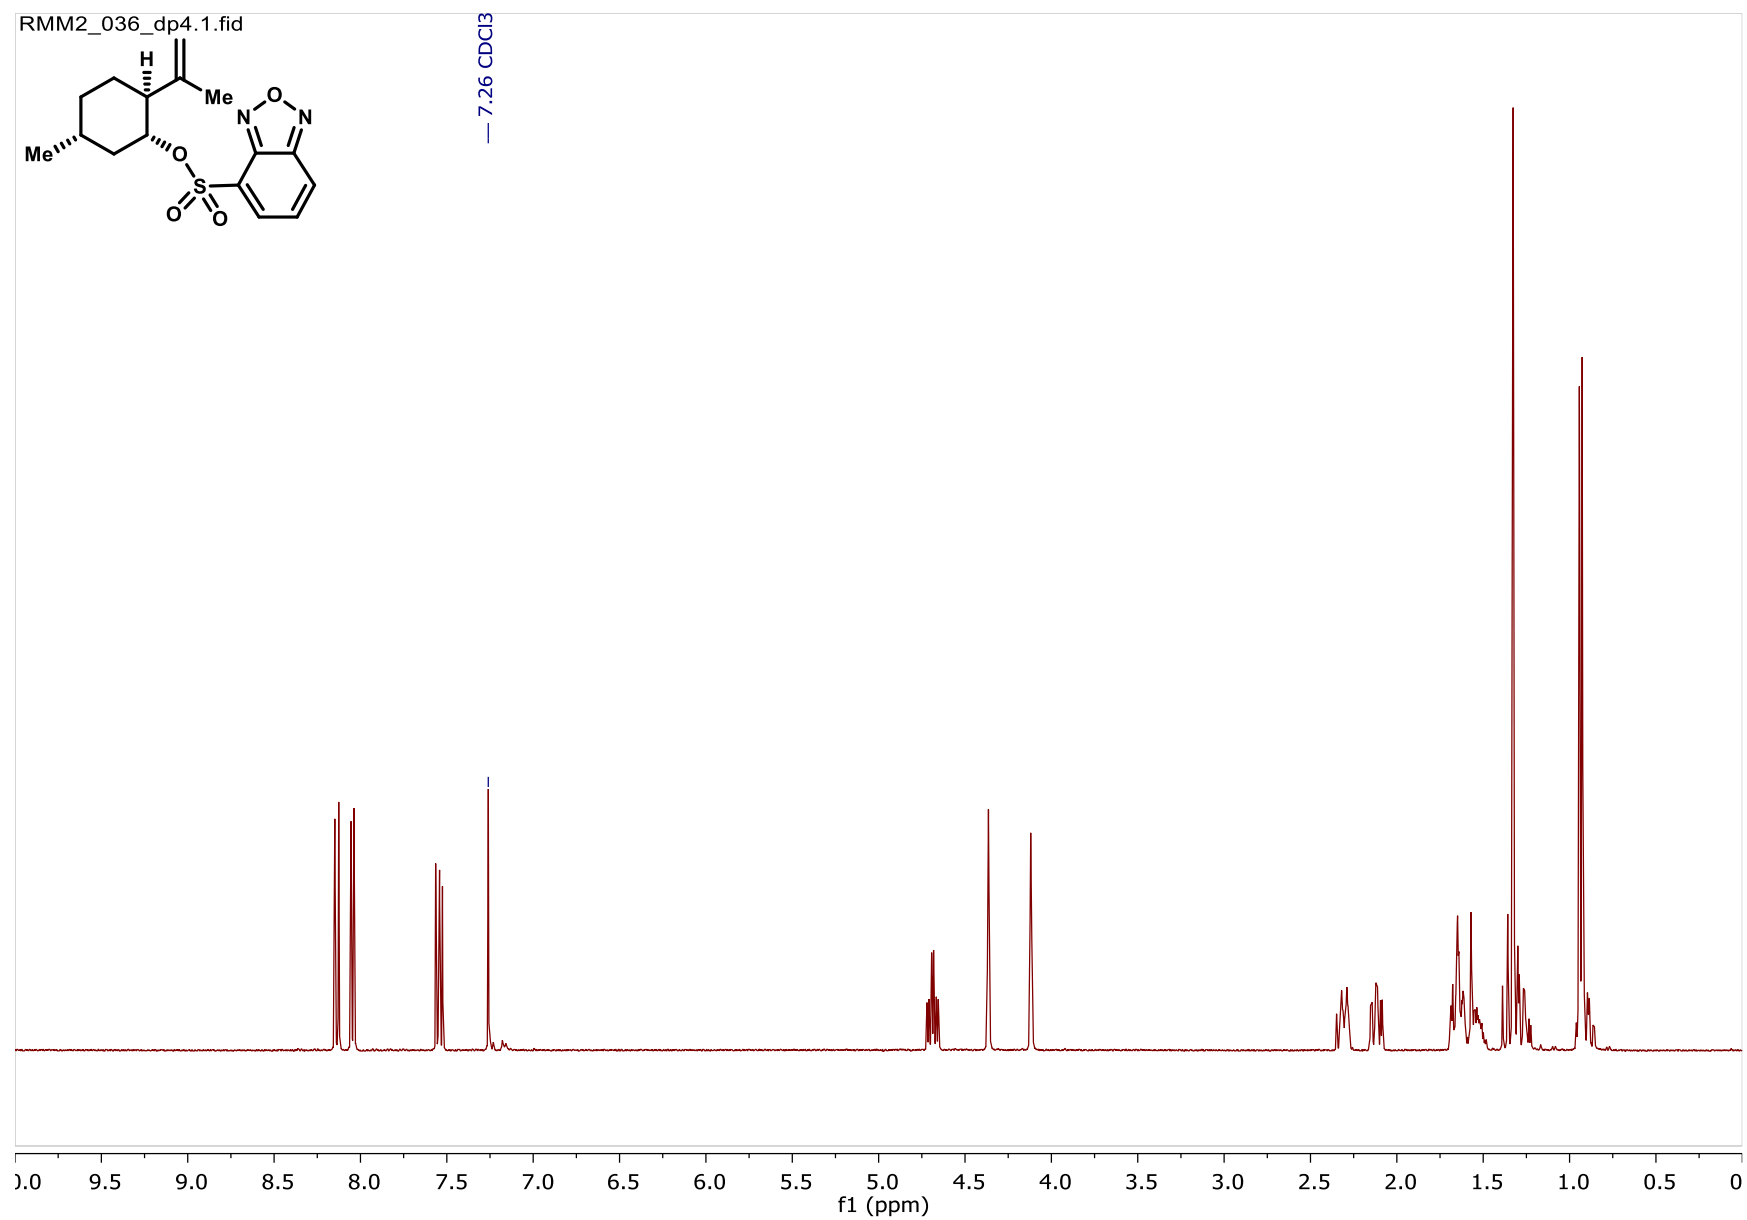

SI-20:  $^{13}\text{C}$ -NMR (101 MHz,  $\text{CDCl}_3$ )

RMM2\_036\_dp4.2.fid

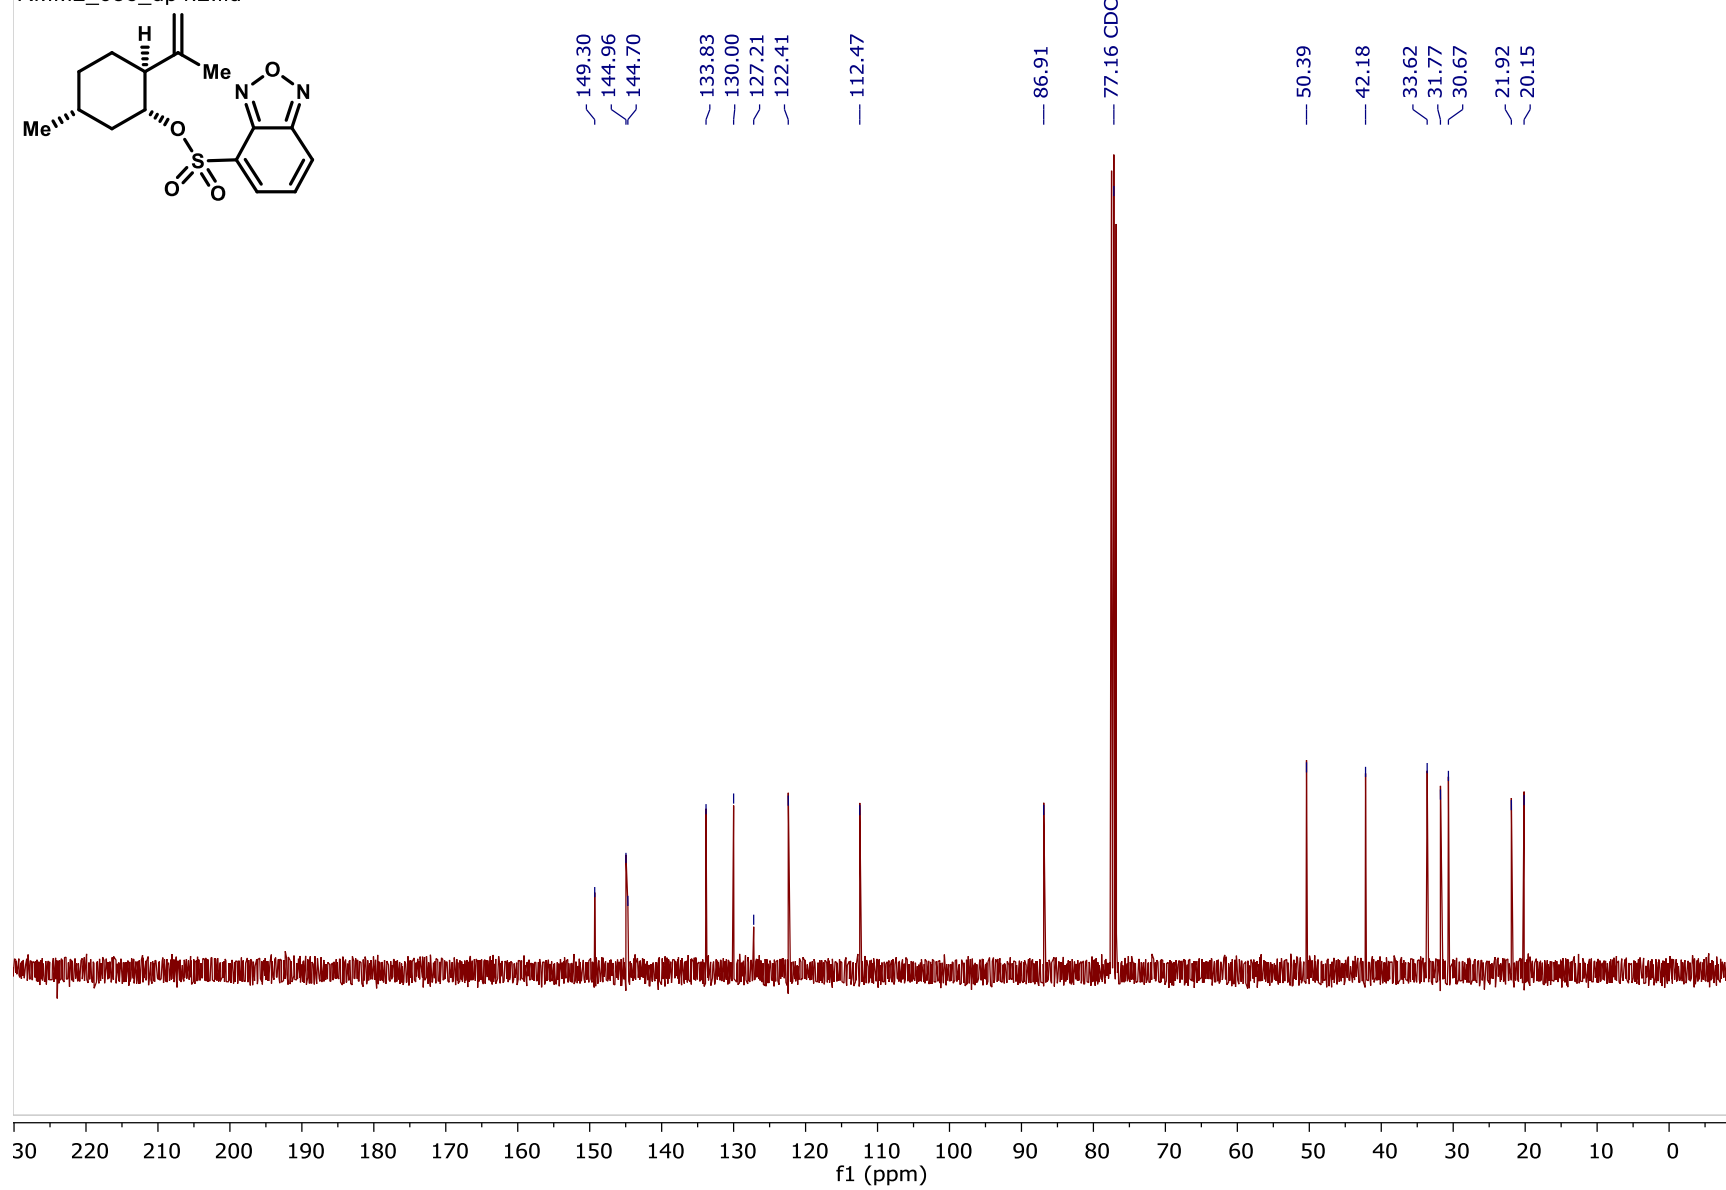

18: <sup>1</sup>H-NMR (600 MHz, CDCl<sub>3</sub>)

RMM2\_043\_av6ptl03cd.1.fid

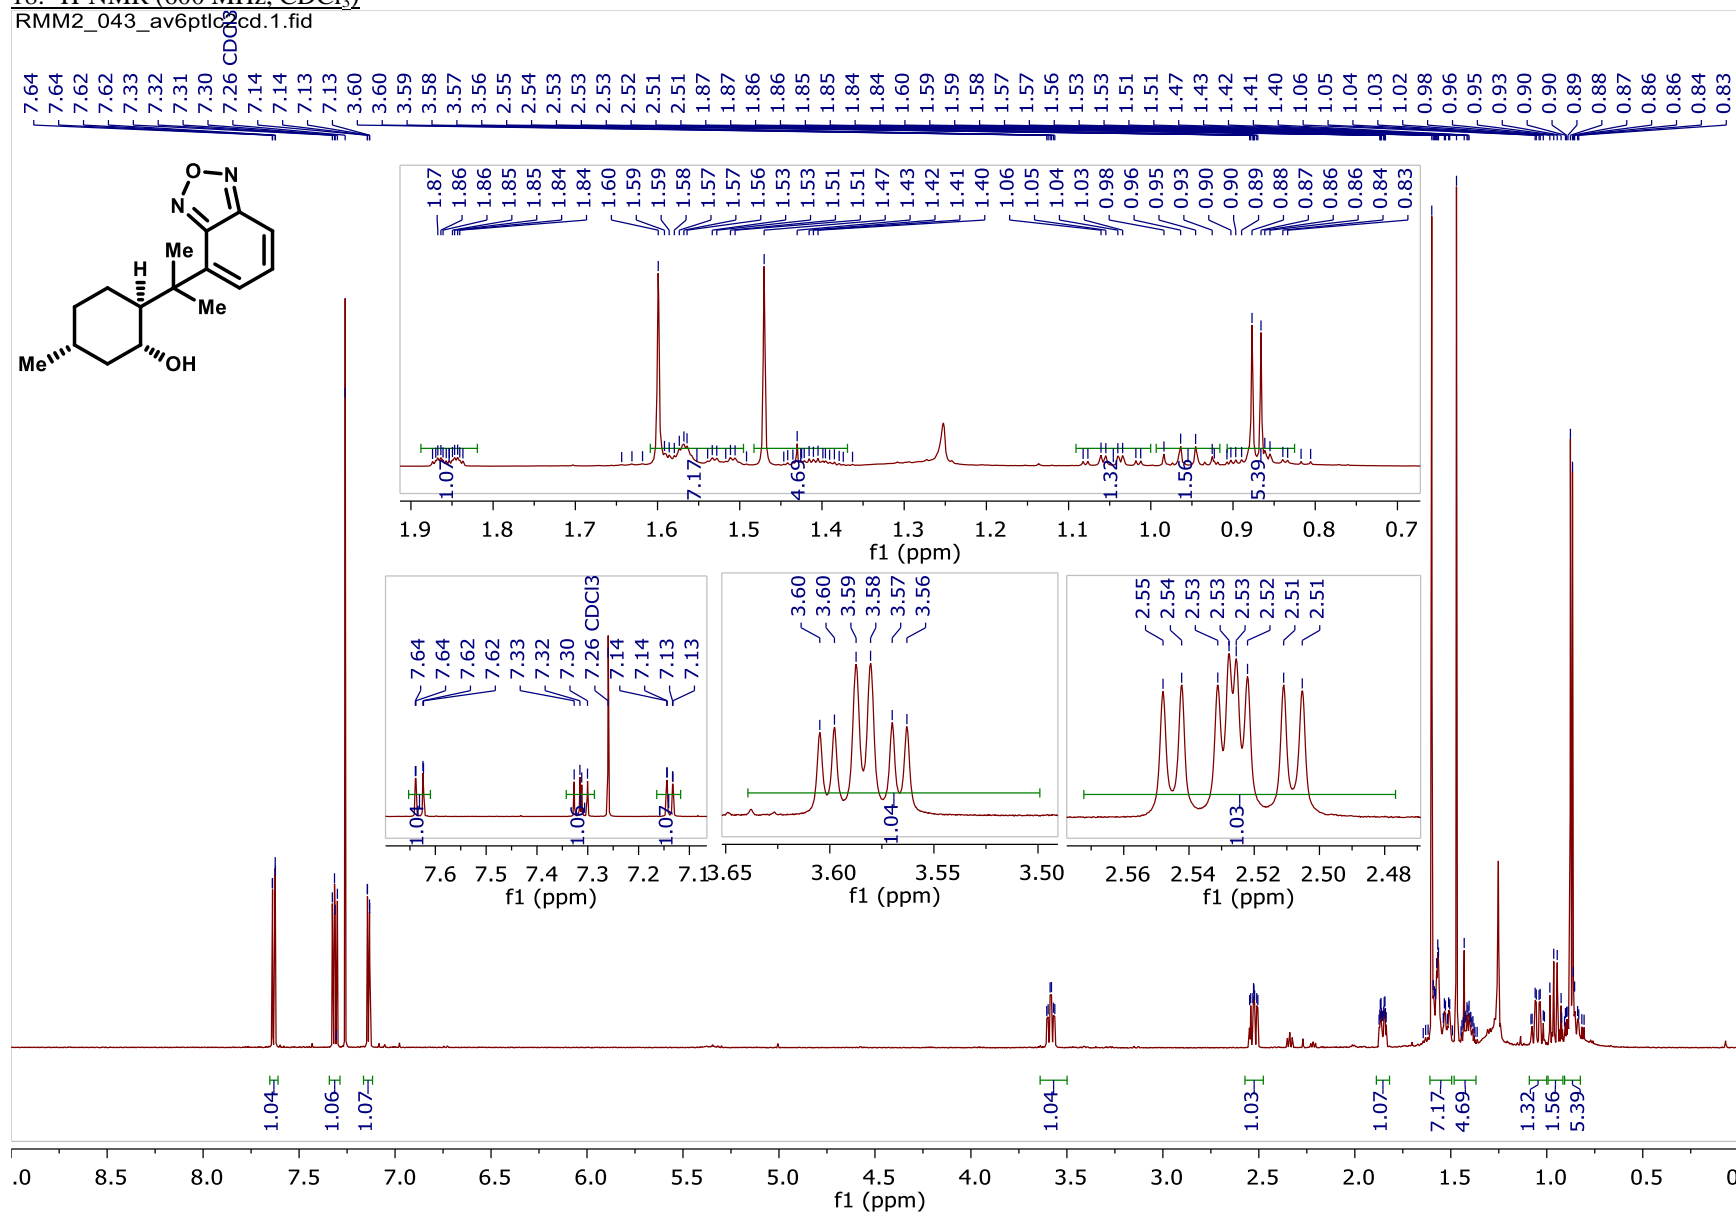

RMM2\_043\_av6ptlc2cd.1.fid

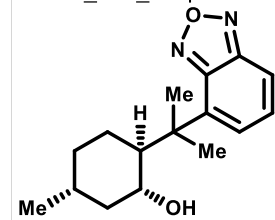

— 7.26 CDCl<sub>3</sub>

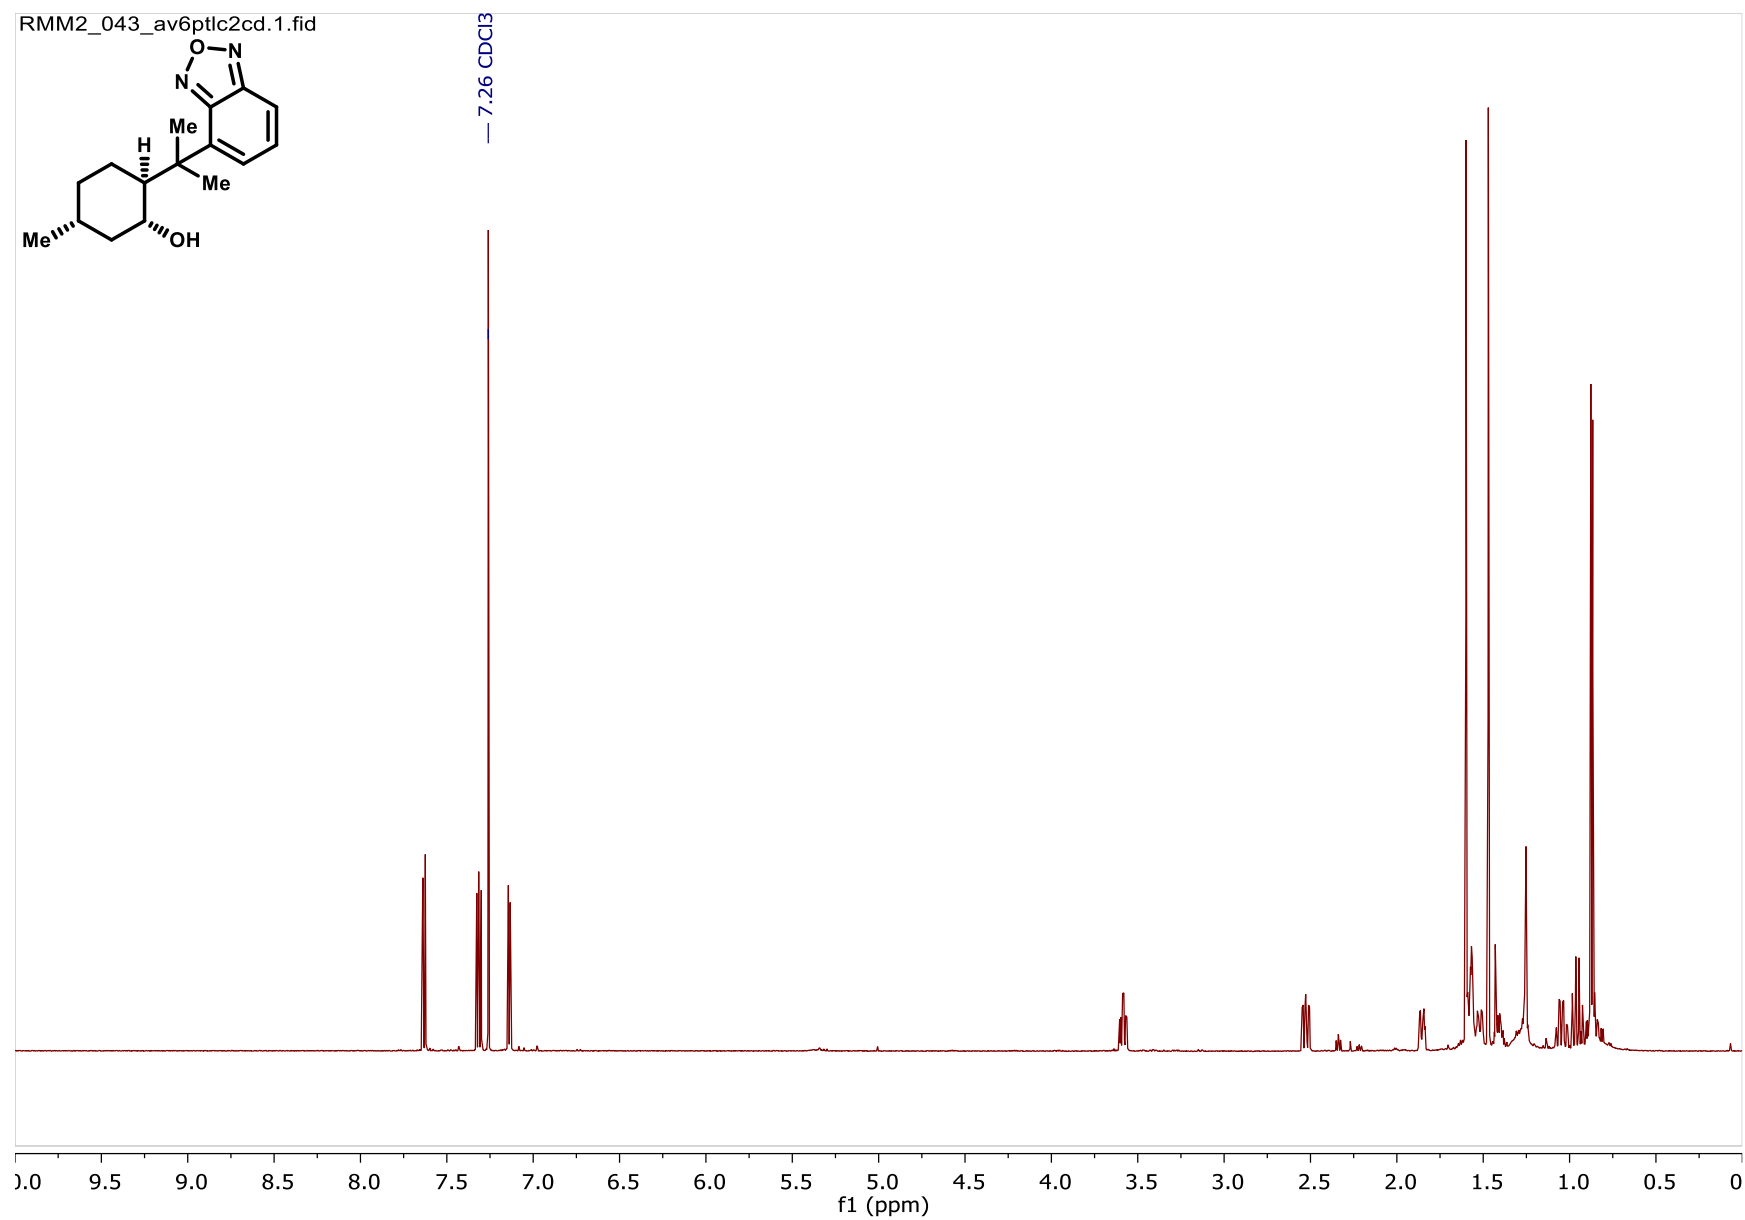

18:  $^{13}\text{C}$ -NMR (151 MHz,  $\text{CDCl}_3$ )

RMM2\_043\_av6ptlc2cd.2.fid

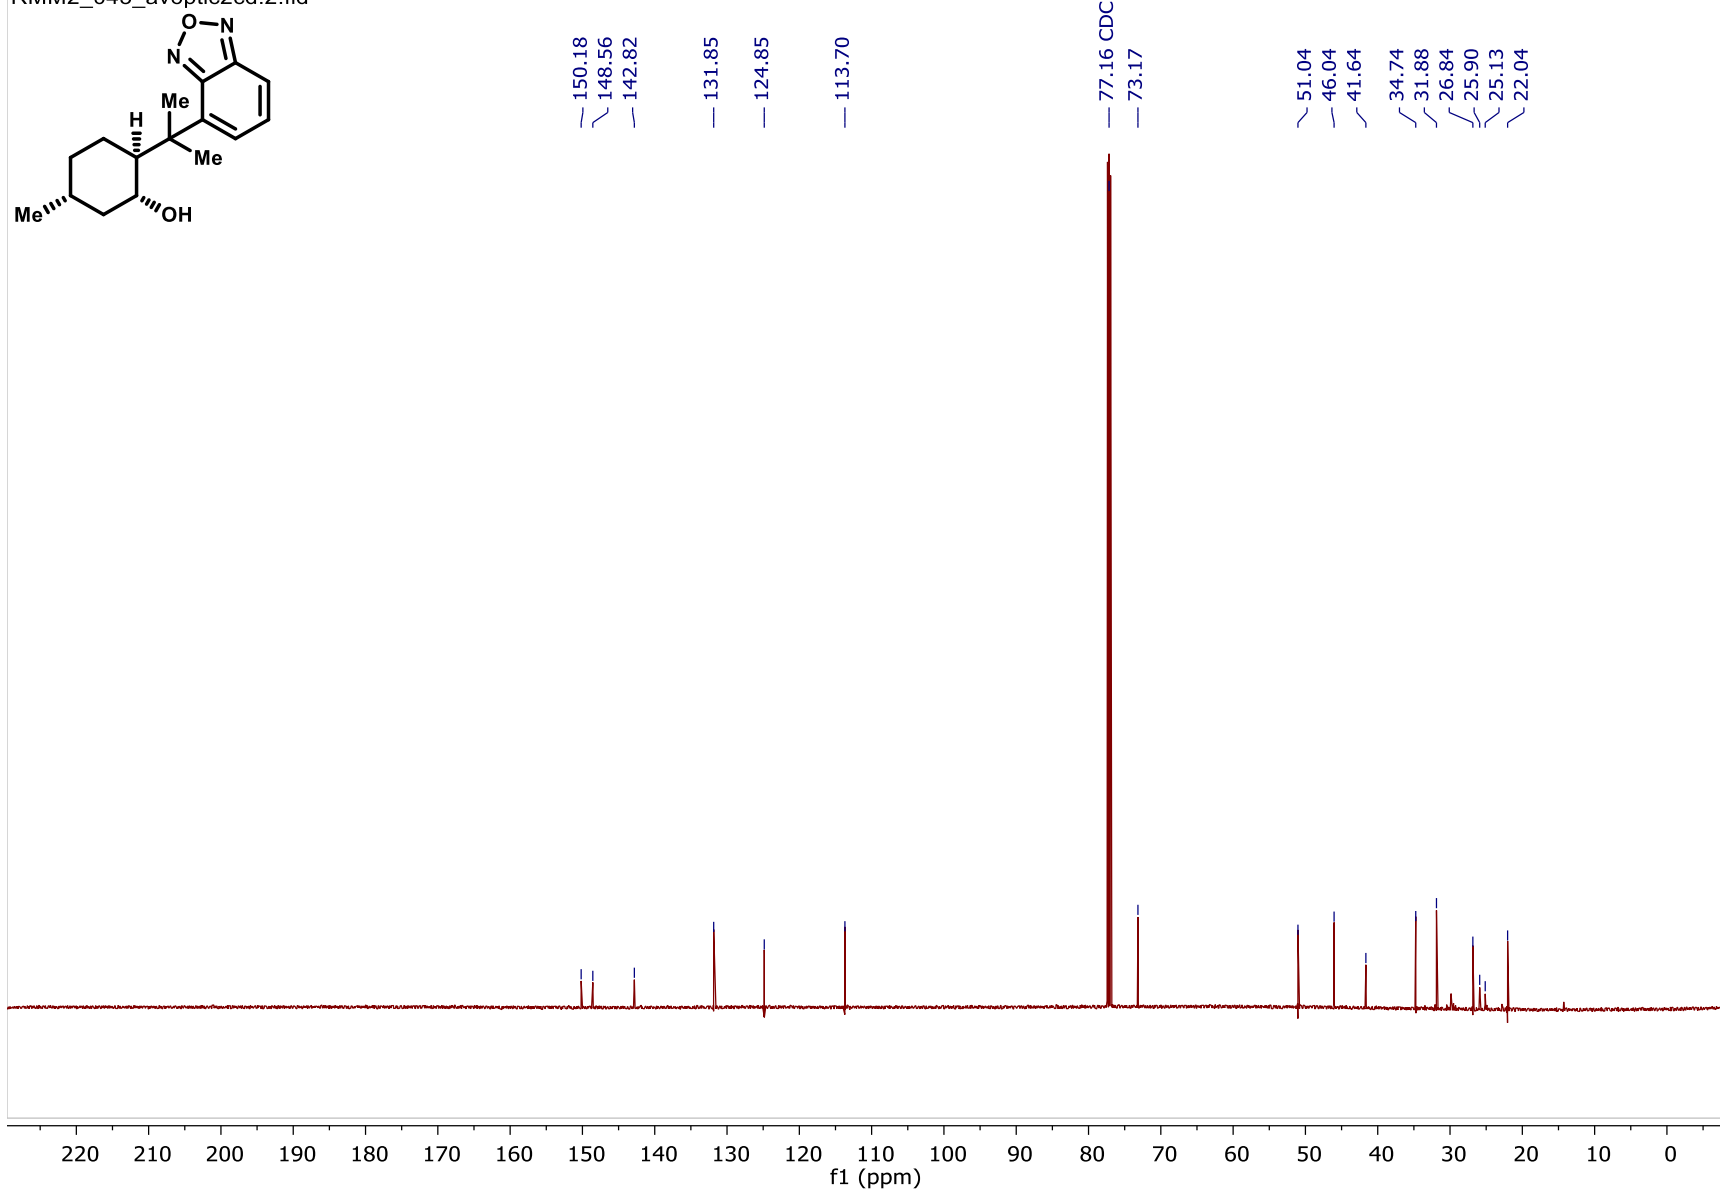

SI-21: <sup>1</sup>H-NMR (600 MHz, CDCl<sub>3</sub>)

RMM2\_0493\_3\_p2.1.fid

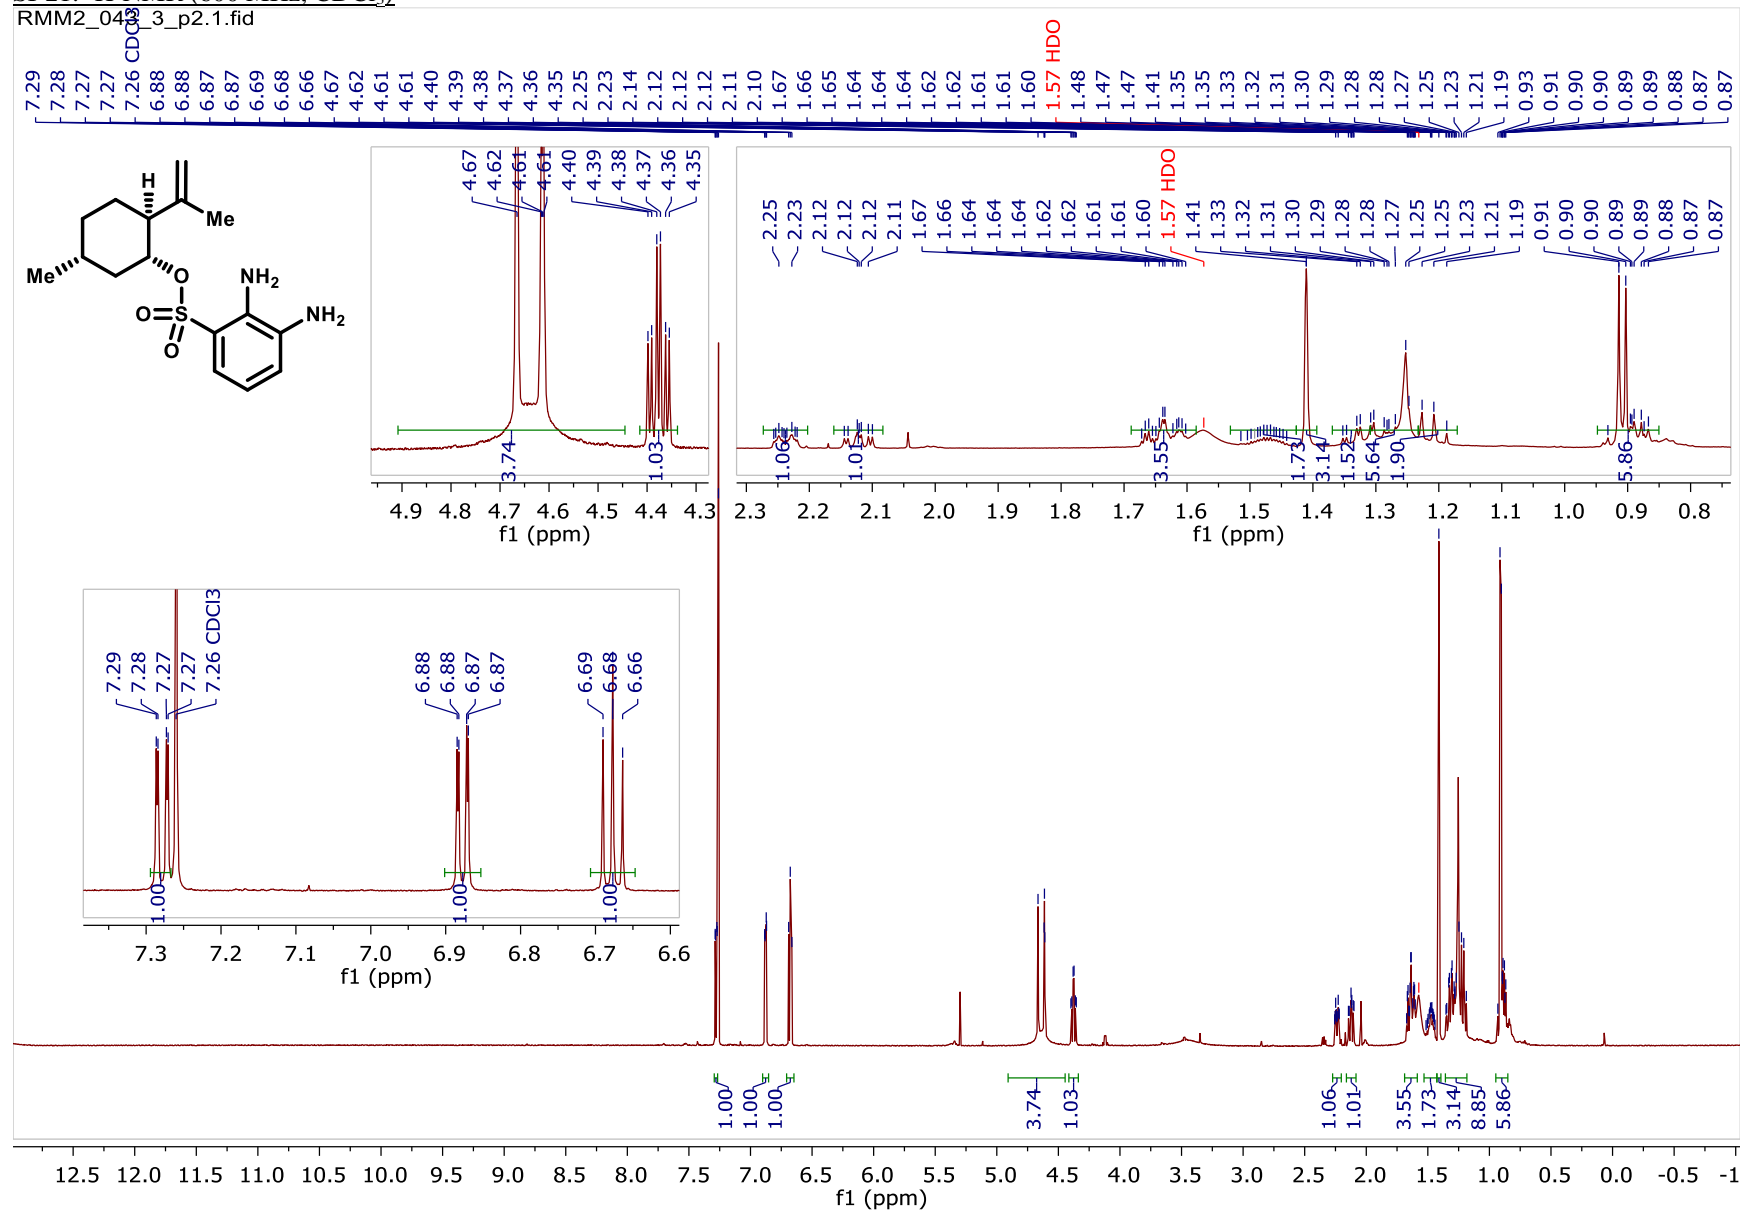

RMM2\_043\_3\_p2.1.fid

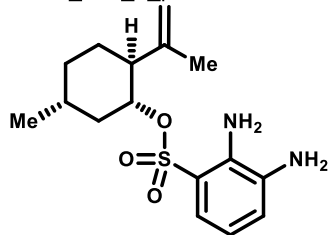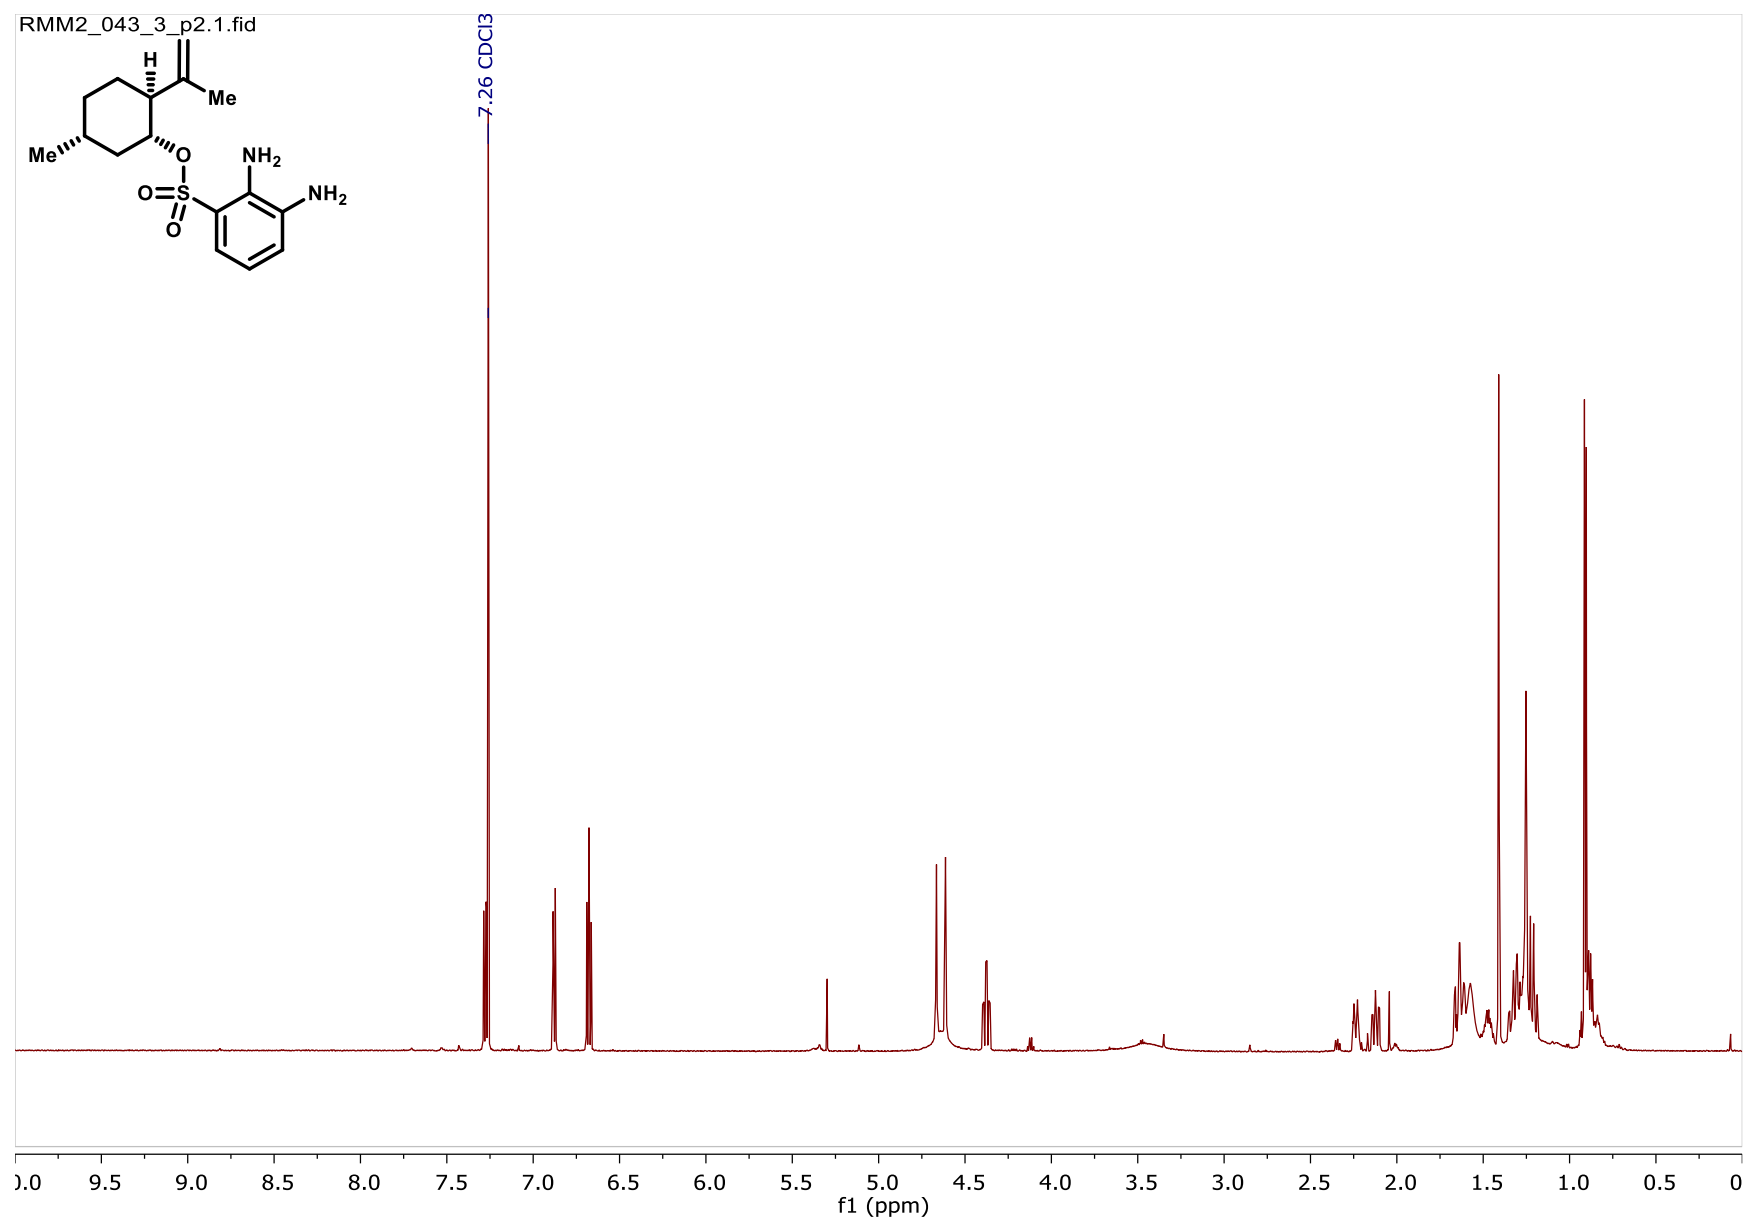



SI-21;  $^{13}\text{C}$ -NMR (151 MHz,  $\text{CDCl}_3$ )

RMM2\_043\_3\_p2.2.fid

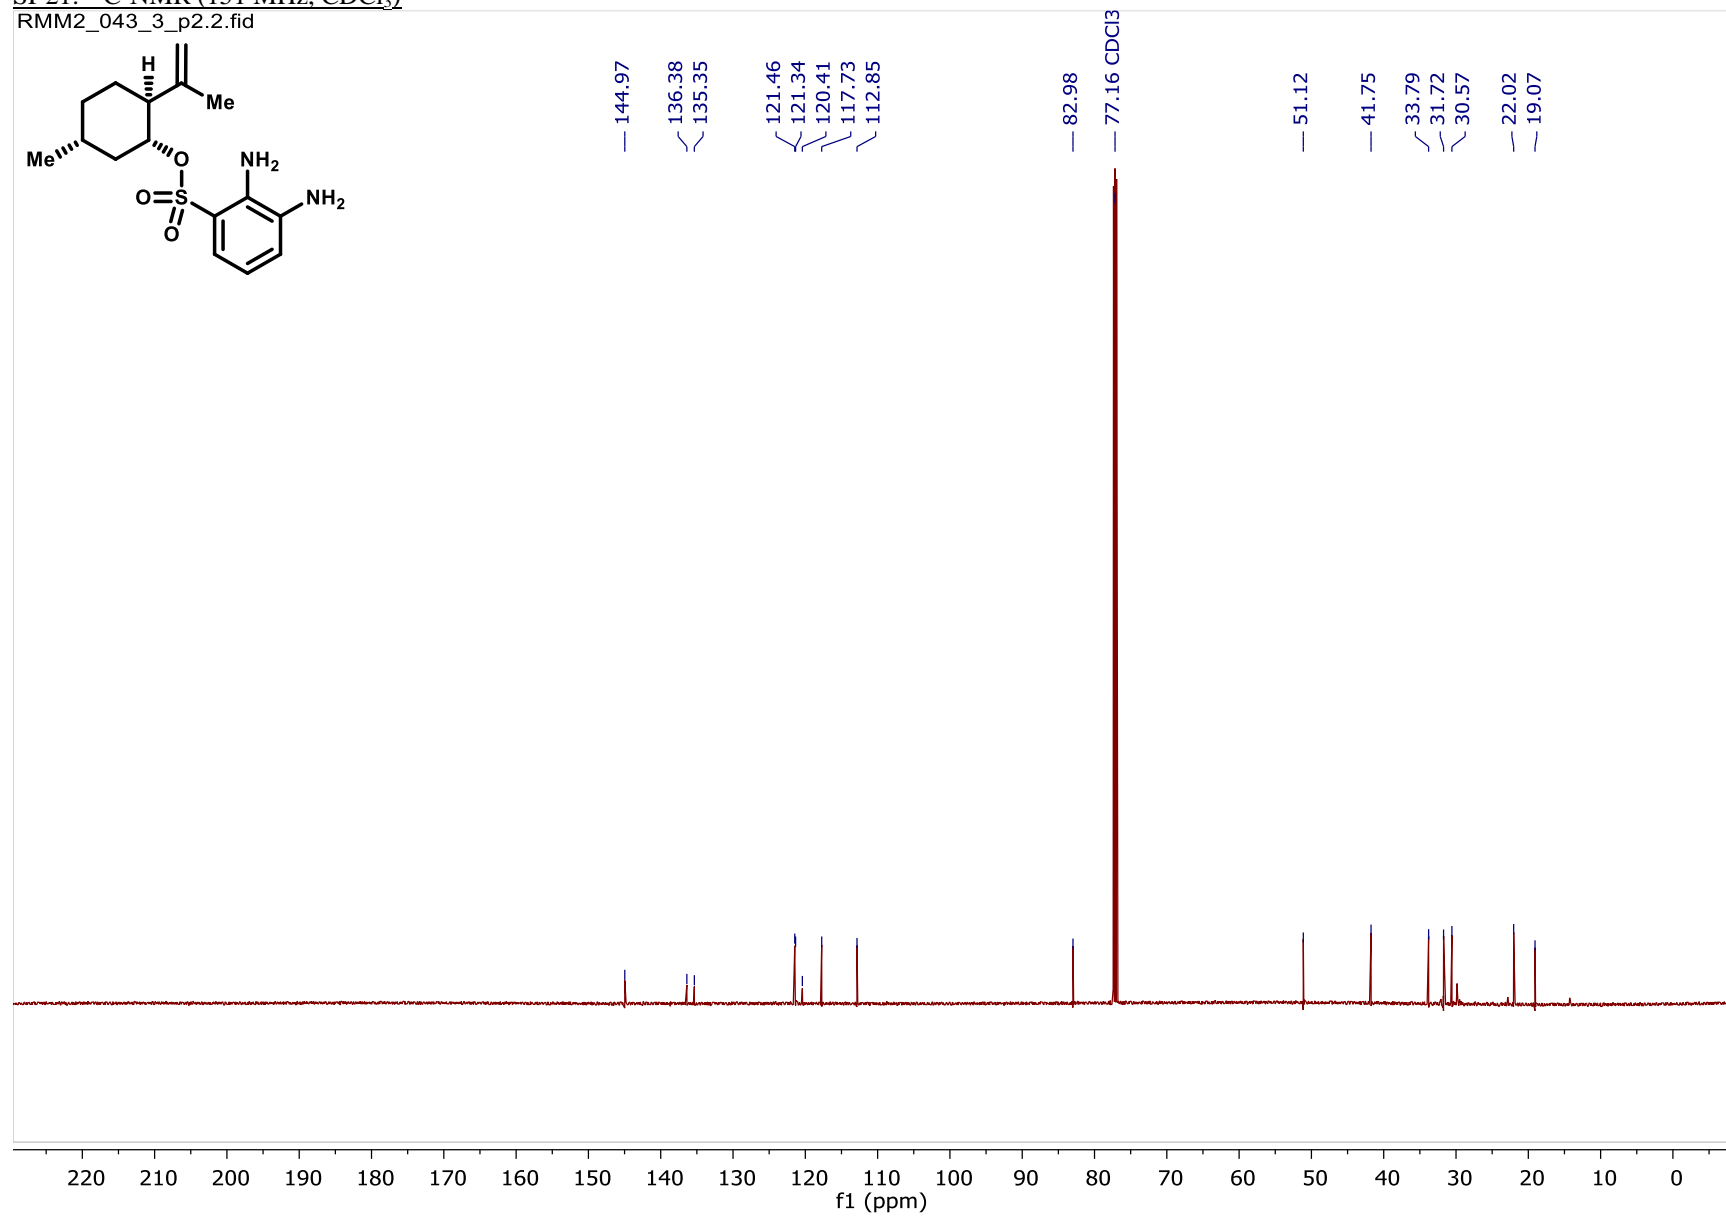

20a:  $^1\text{H}$ -NMR (600 MHz,  $\text{CDCl}_3$ )

RMM2\_101\_pur2.1.fid

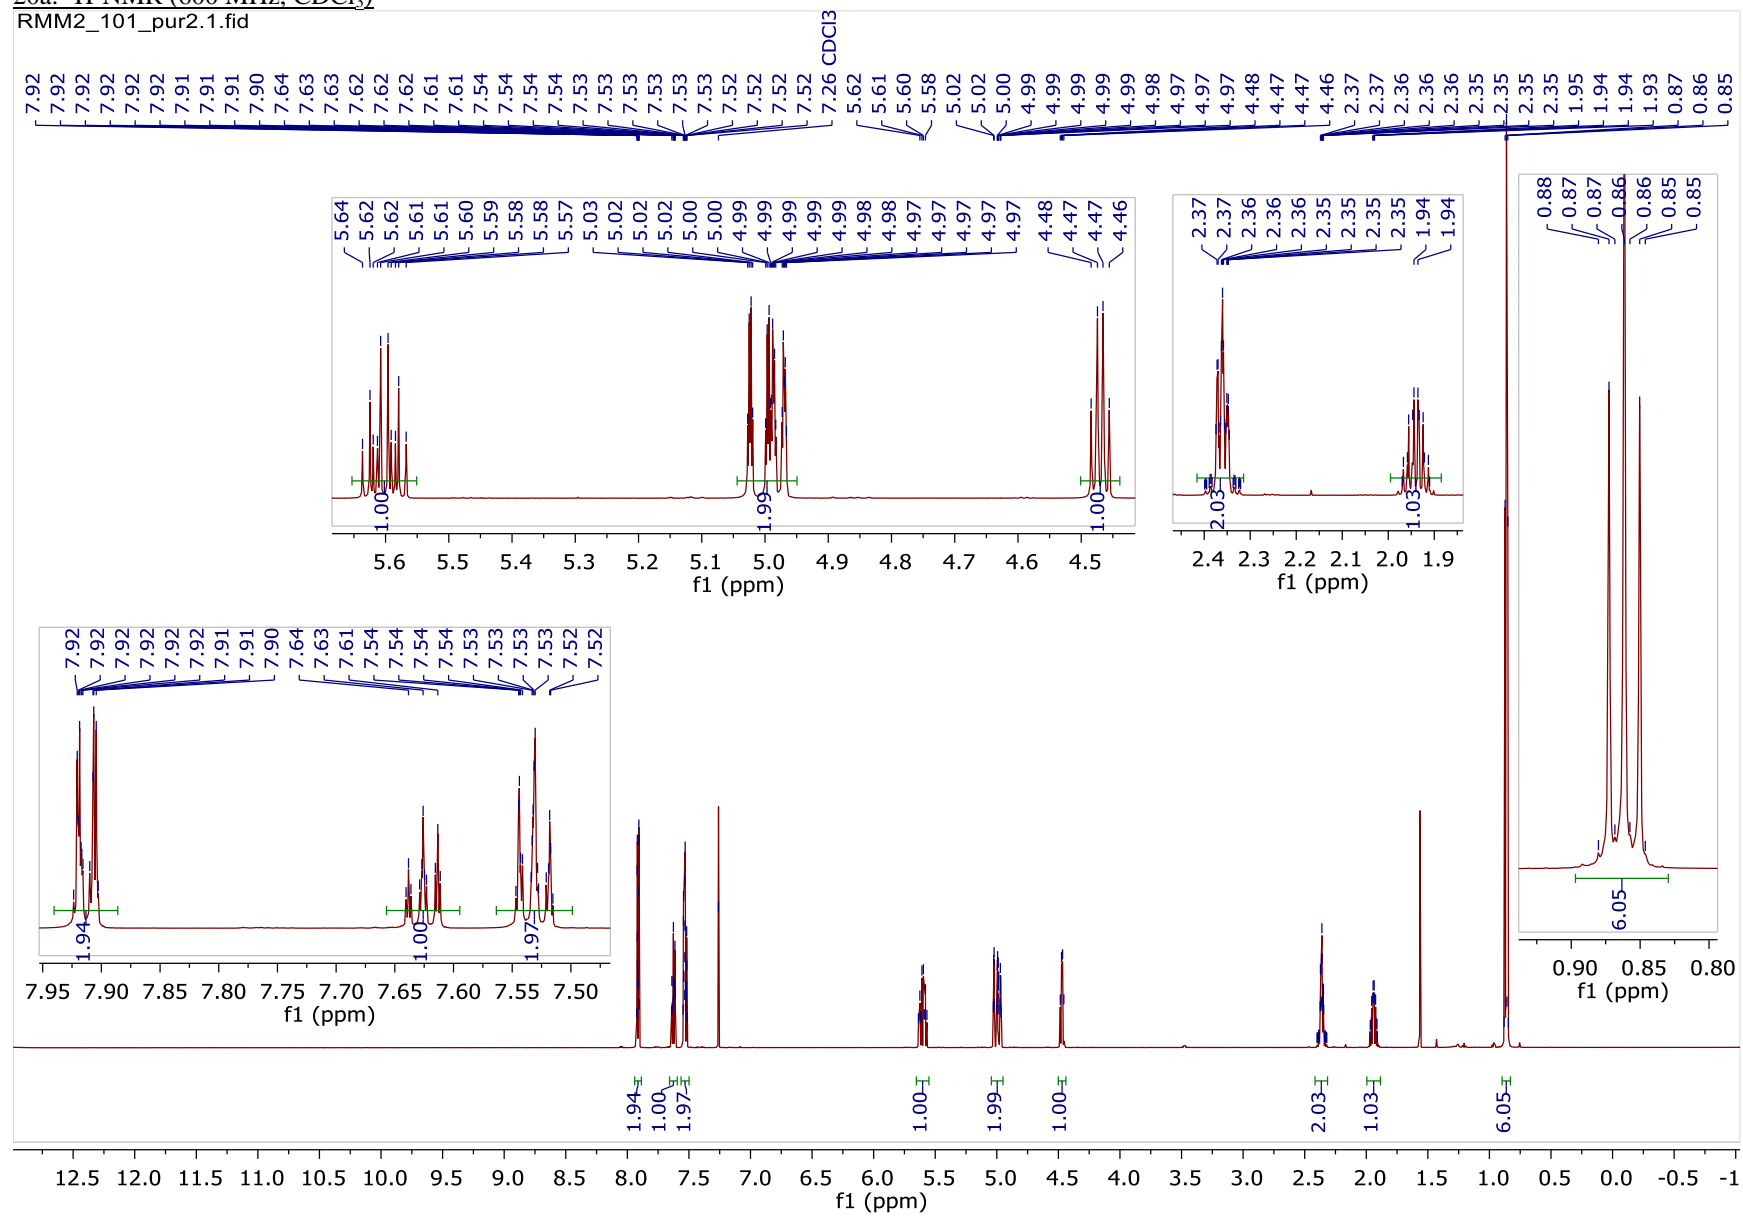

RMM2\_101\_pur2.1.fid

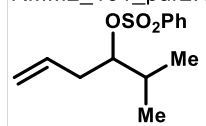

— 7.26 CDCl<sub>3</sub>

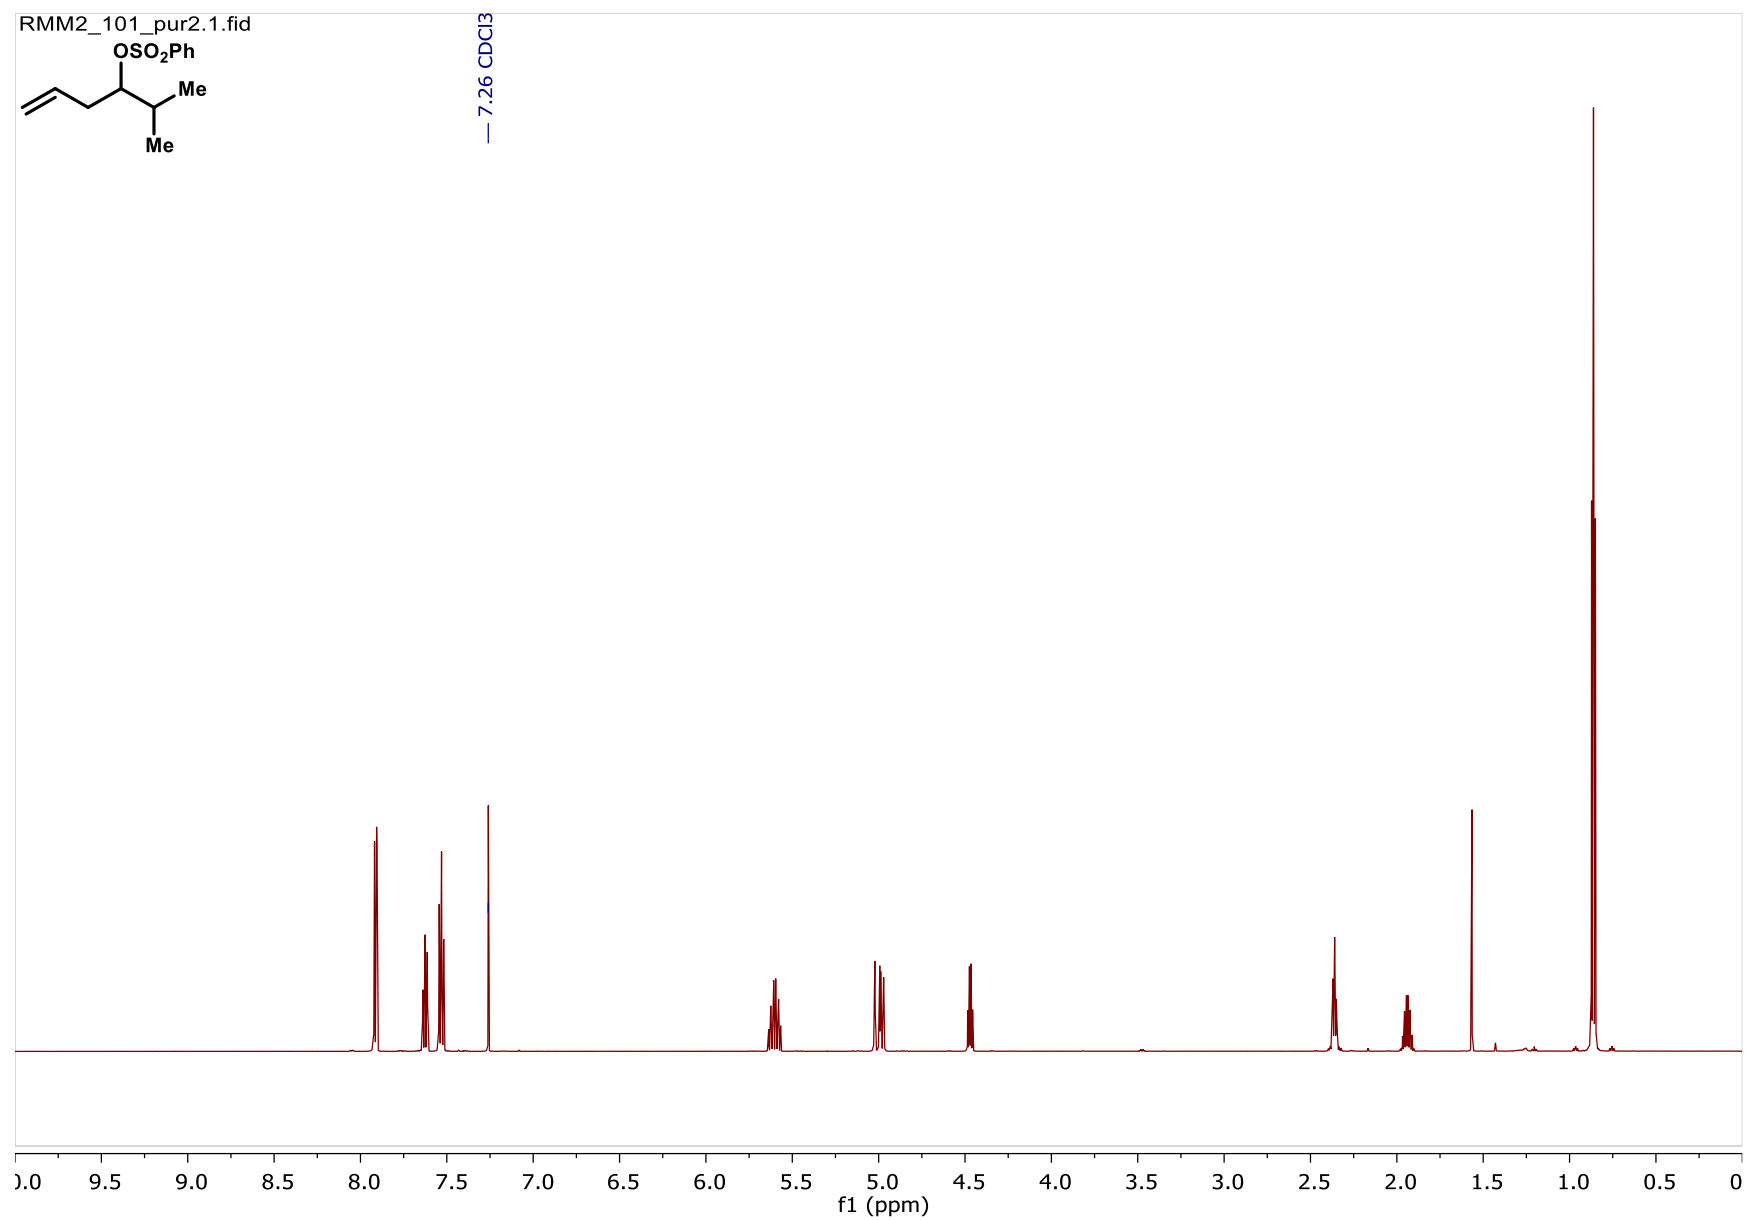

20a:  $^{13}\text{C}$ -NMR (151 MHz,  $\text{CDCl}_3$ )

RMM2\_101\_pur2.2.fid

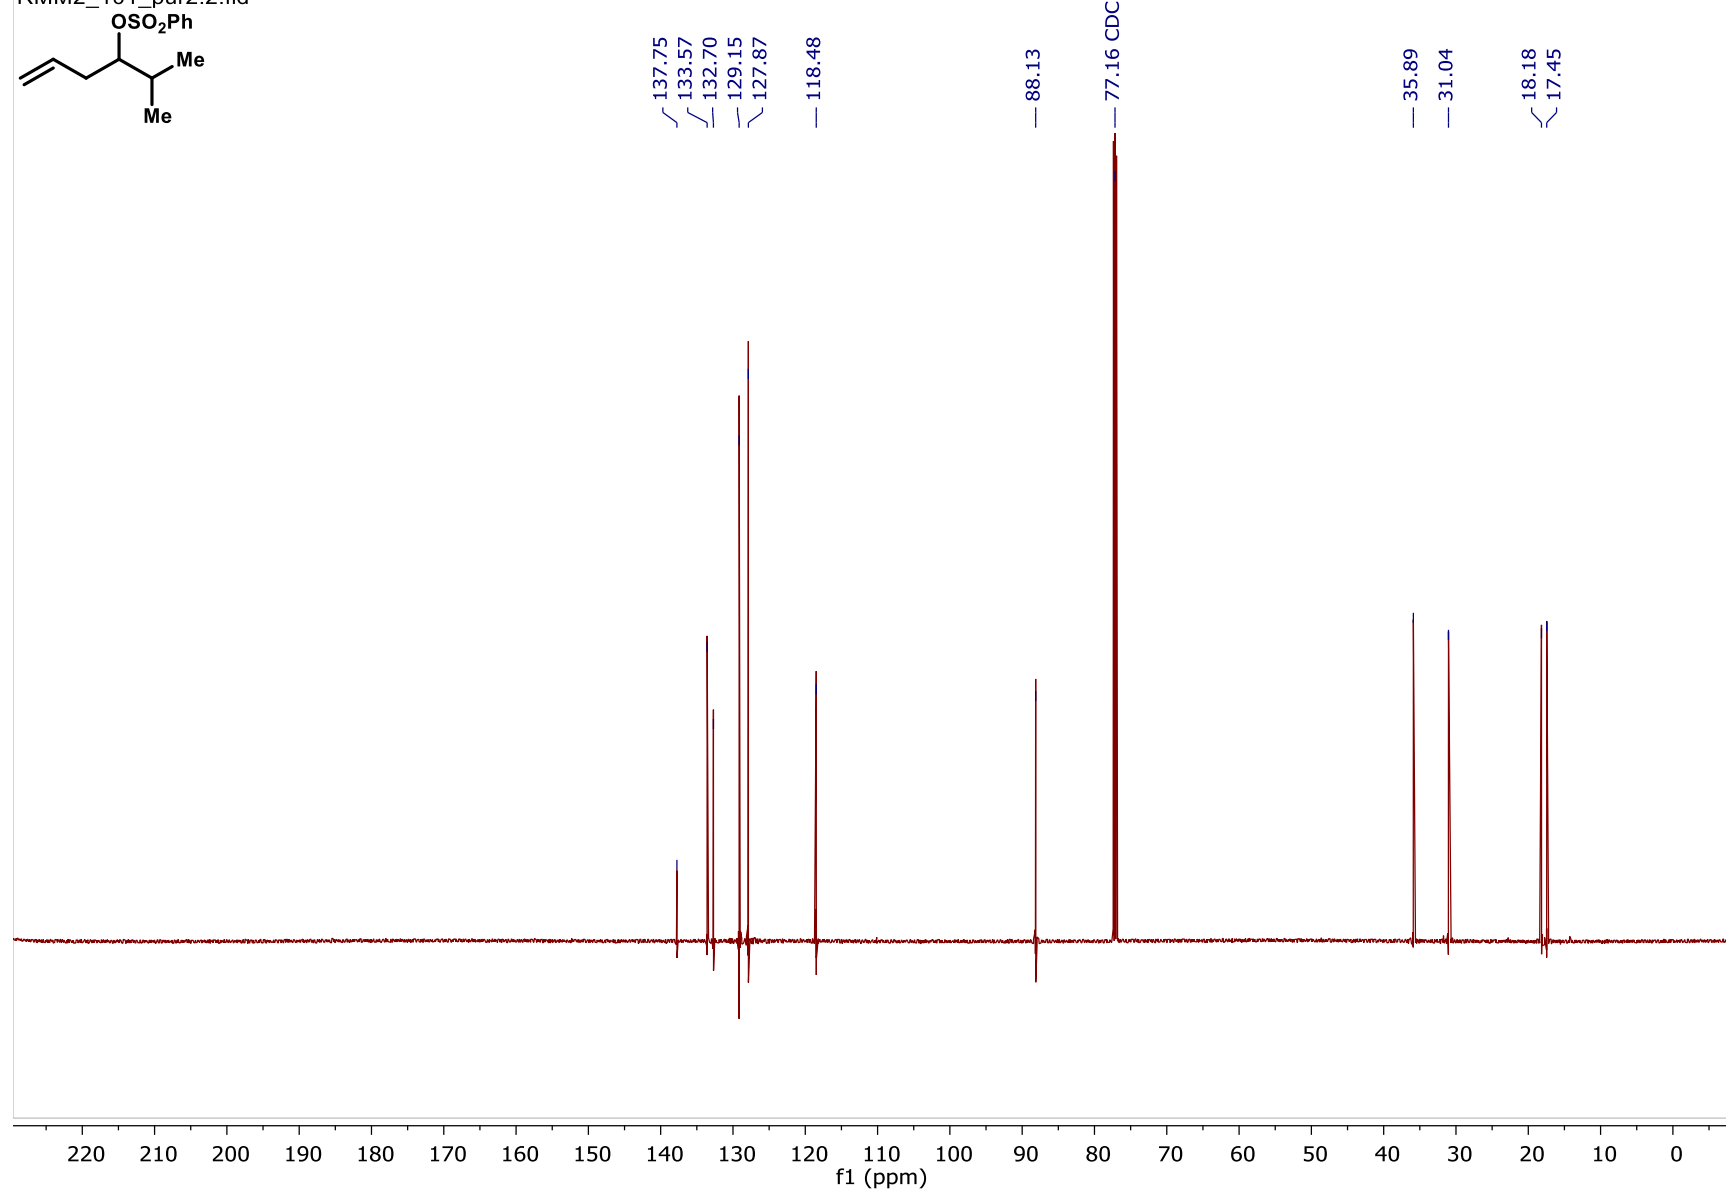

20b:  $^1\text{H}$ -NMR (400 MHz,  $\text{CDCl}_3$ )

RMM2\_102\_2\_pur.1.fid

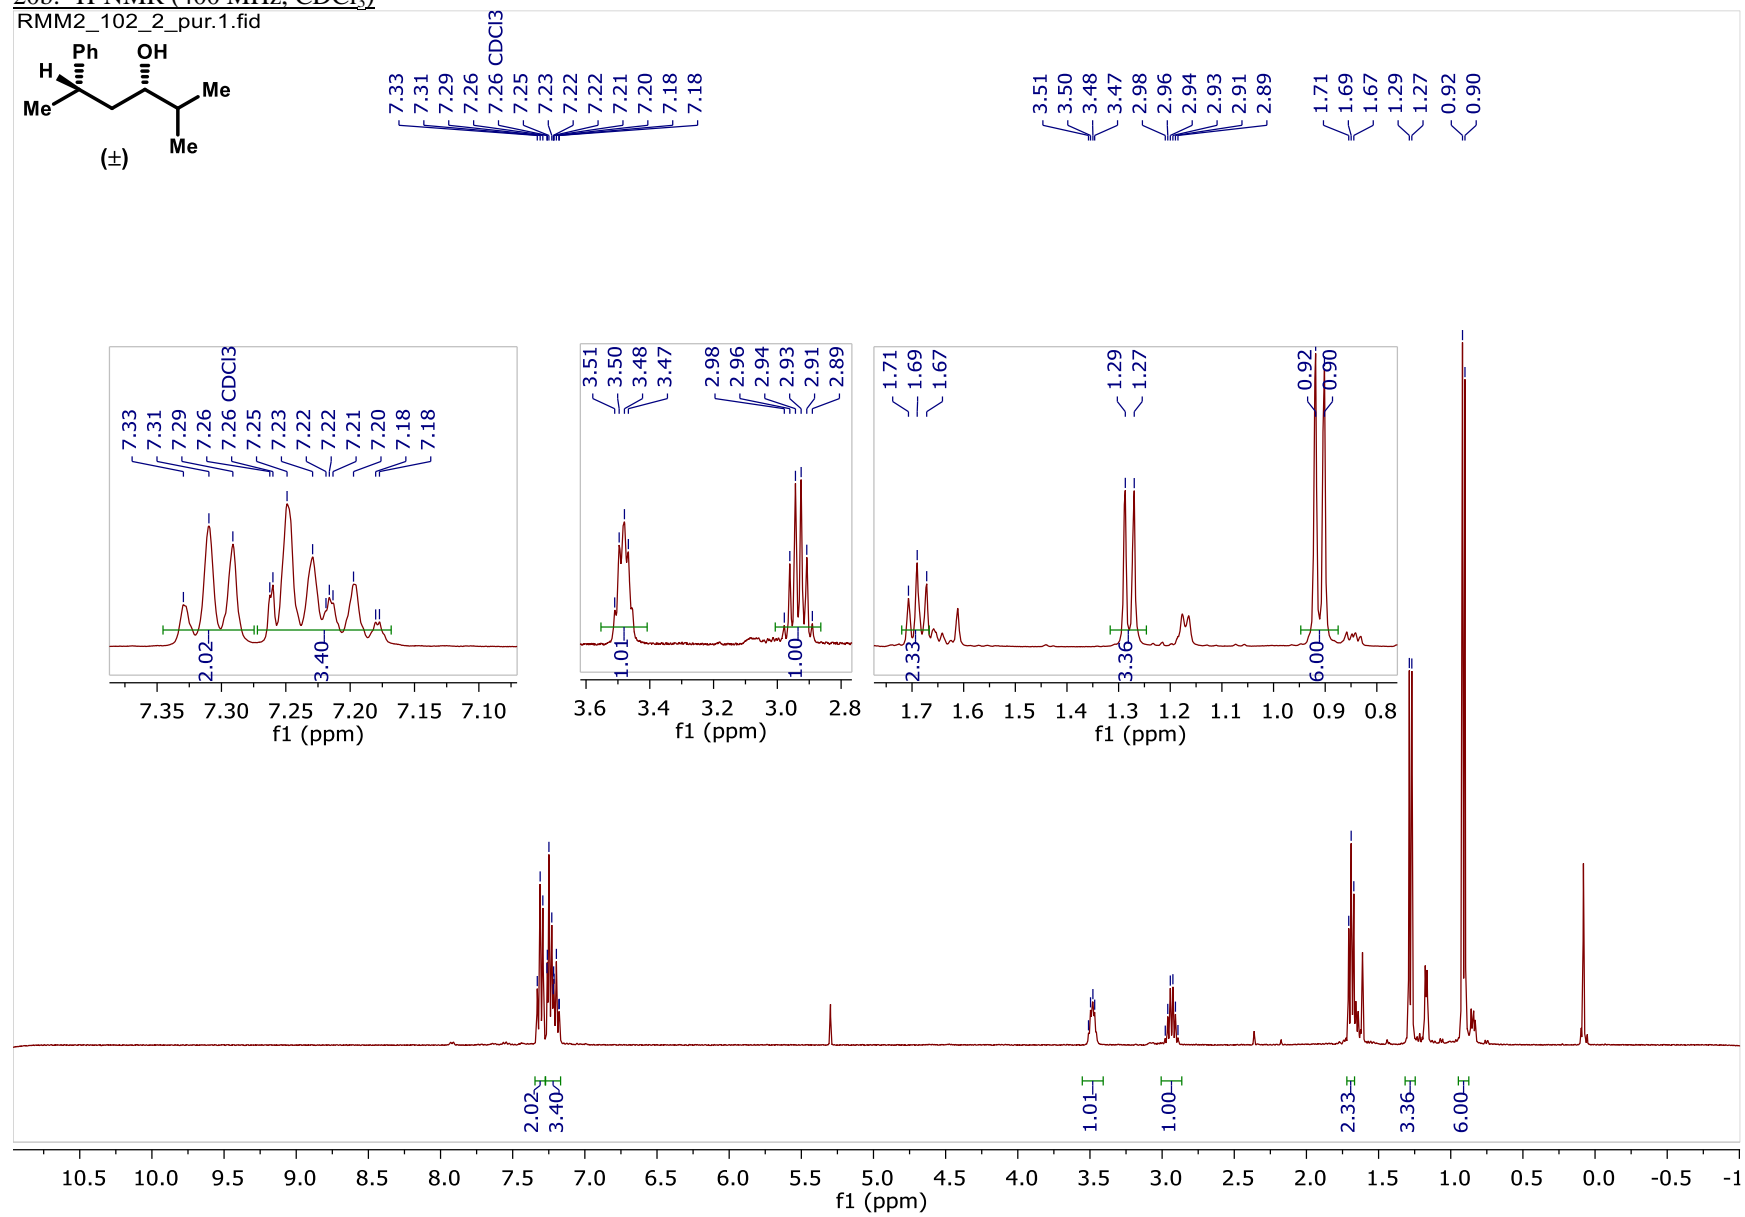

RMM2\_102\_2\_pur.1.fid

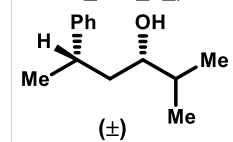

— 7.26 CDCl<sub>3</sub>

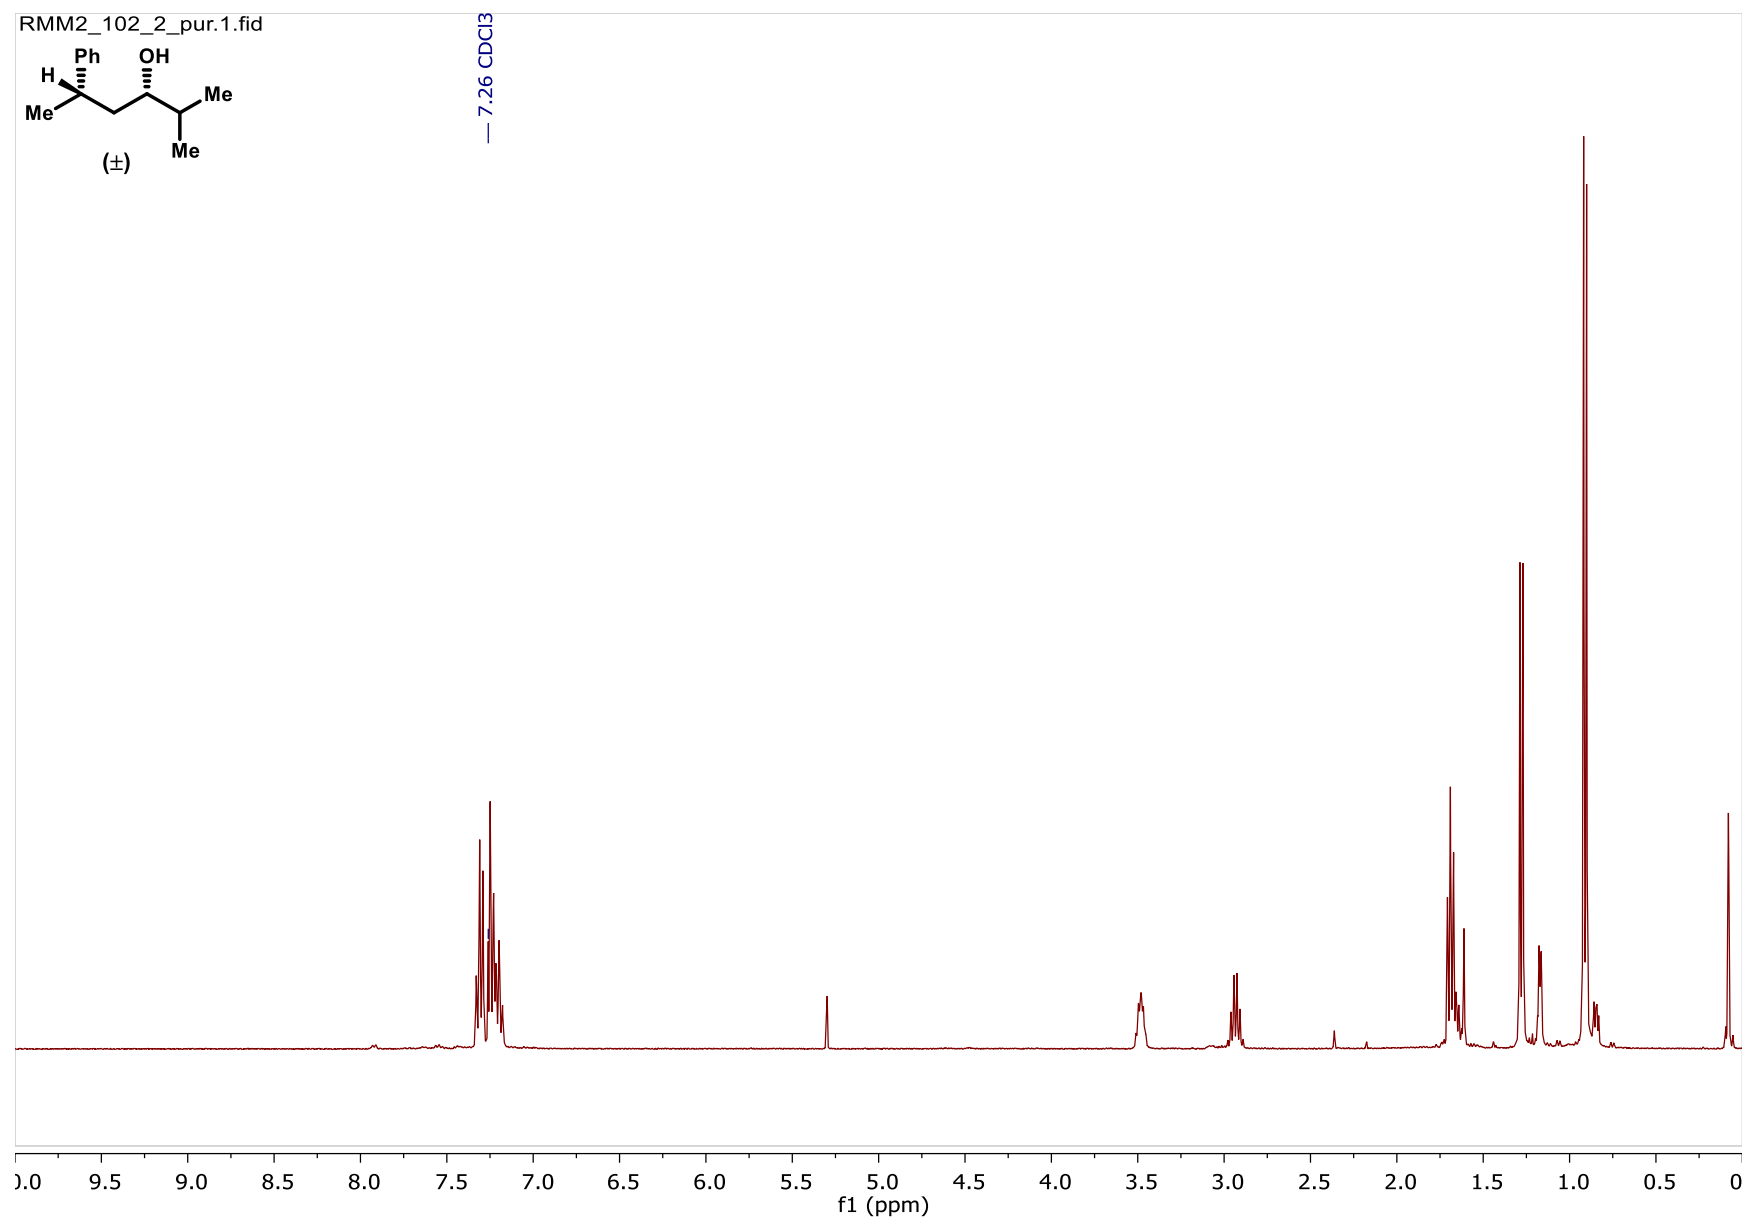

20b:  $^{13}\text{C}$ -NMR (400 MHz,  $\text{CDCl}_3$ )

RMM2\_102\_2\_pur.2.fid

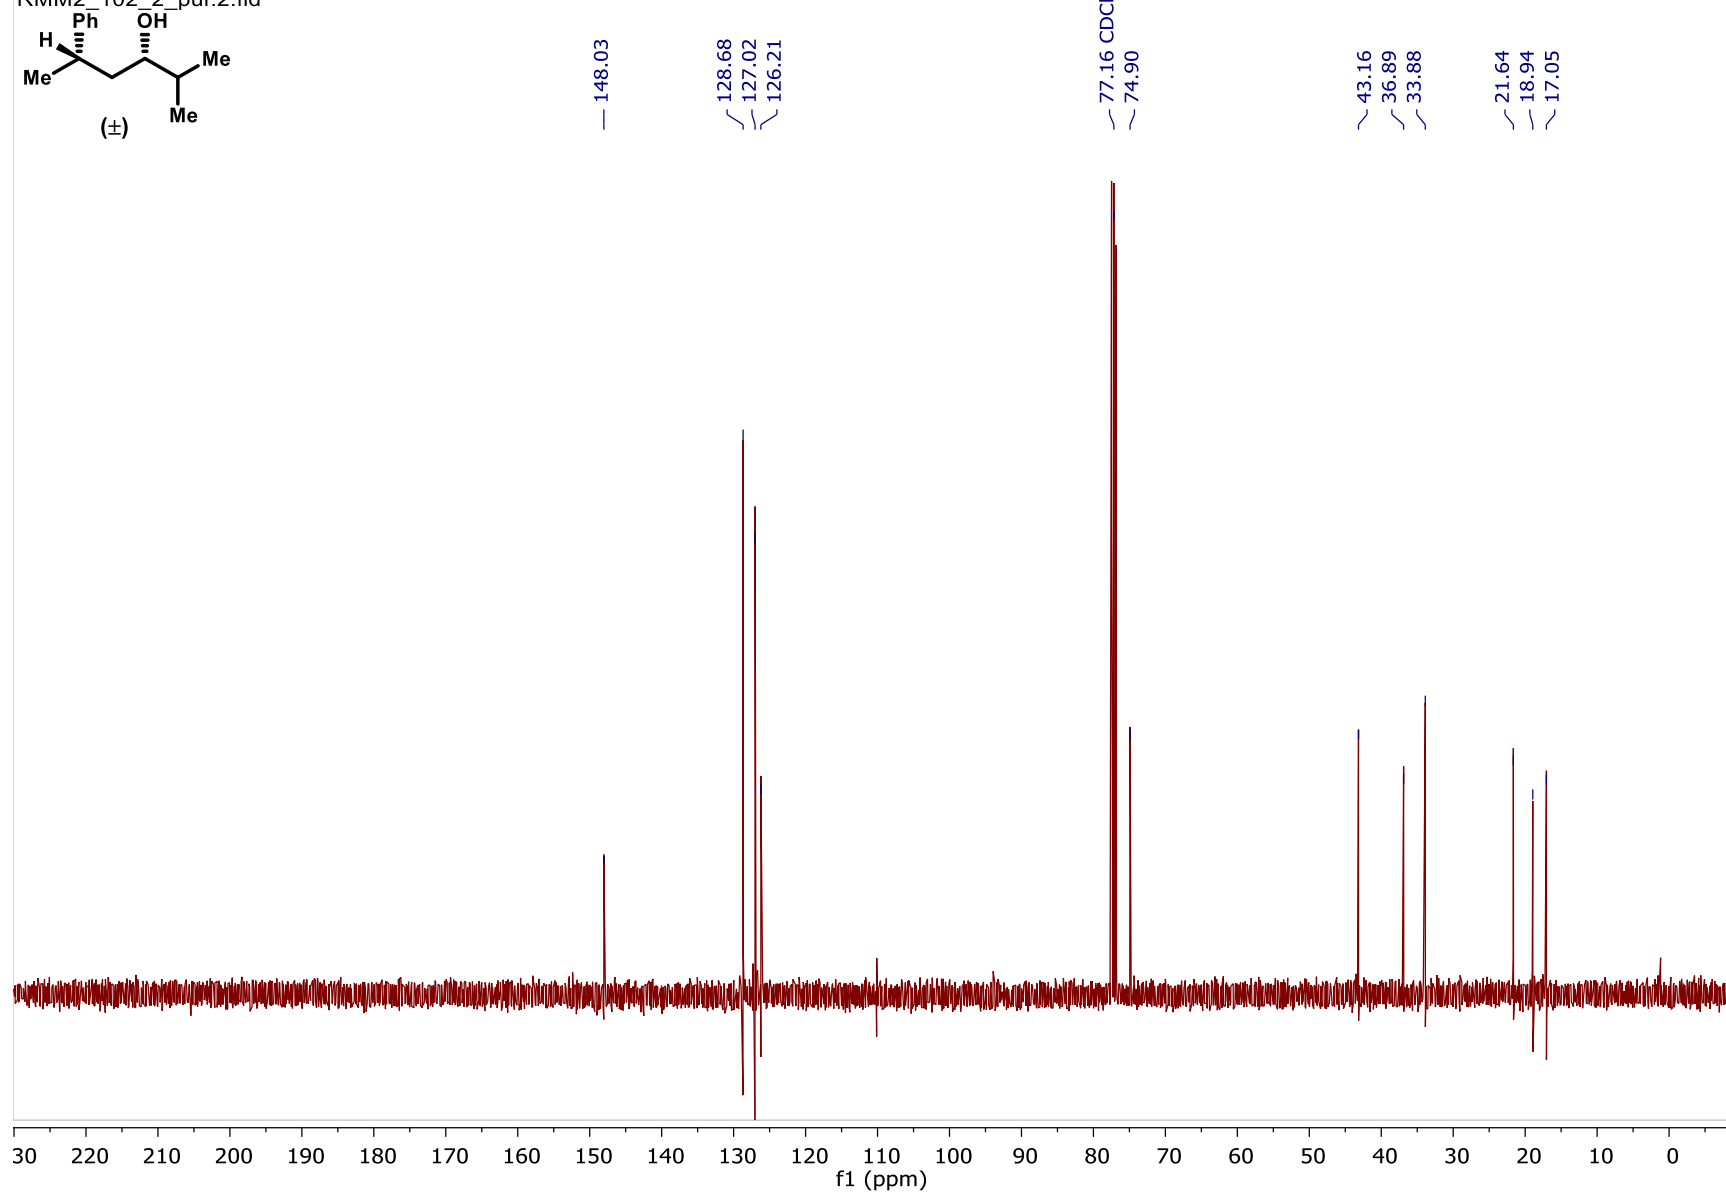

21a:  $^1\text{H}$ -NMR

SCNMR129501 sulfonyl vinyl ch.2.fid  
H-1 Routine, CP-DCH, AVIII HD-600

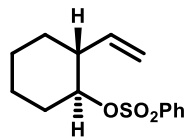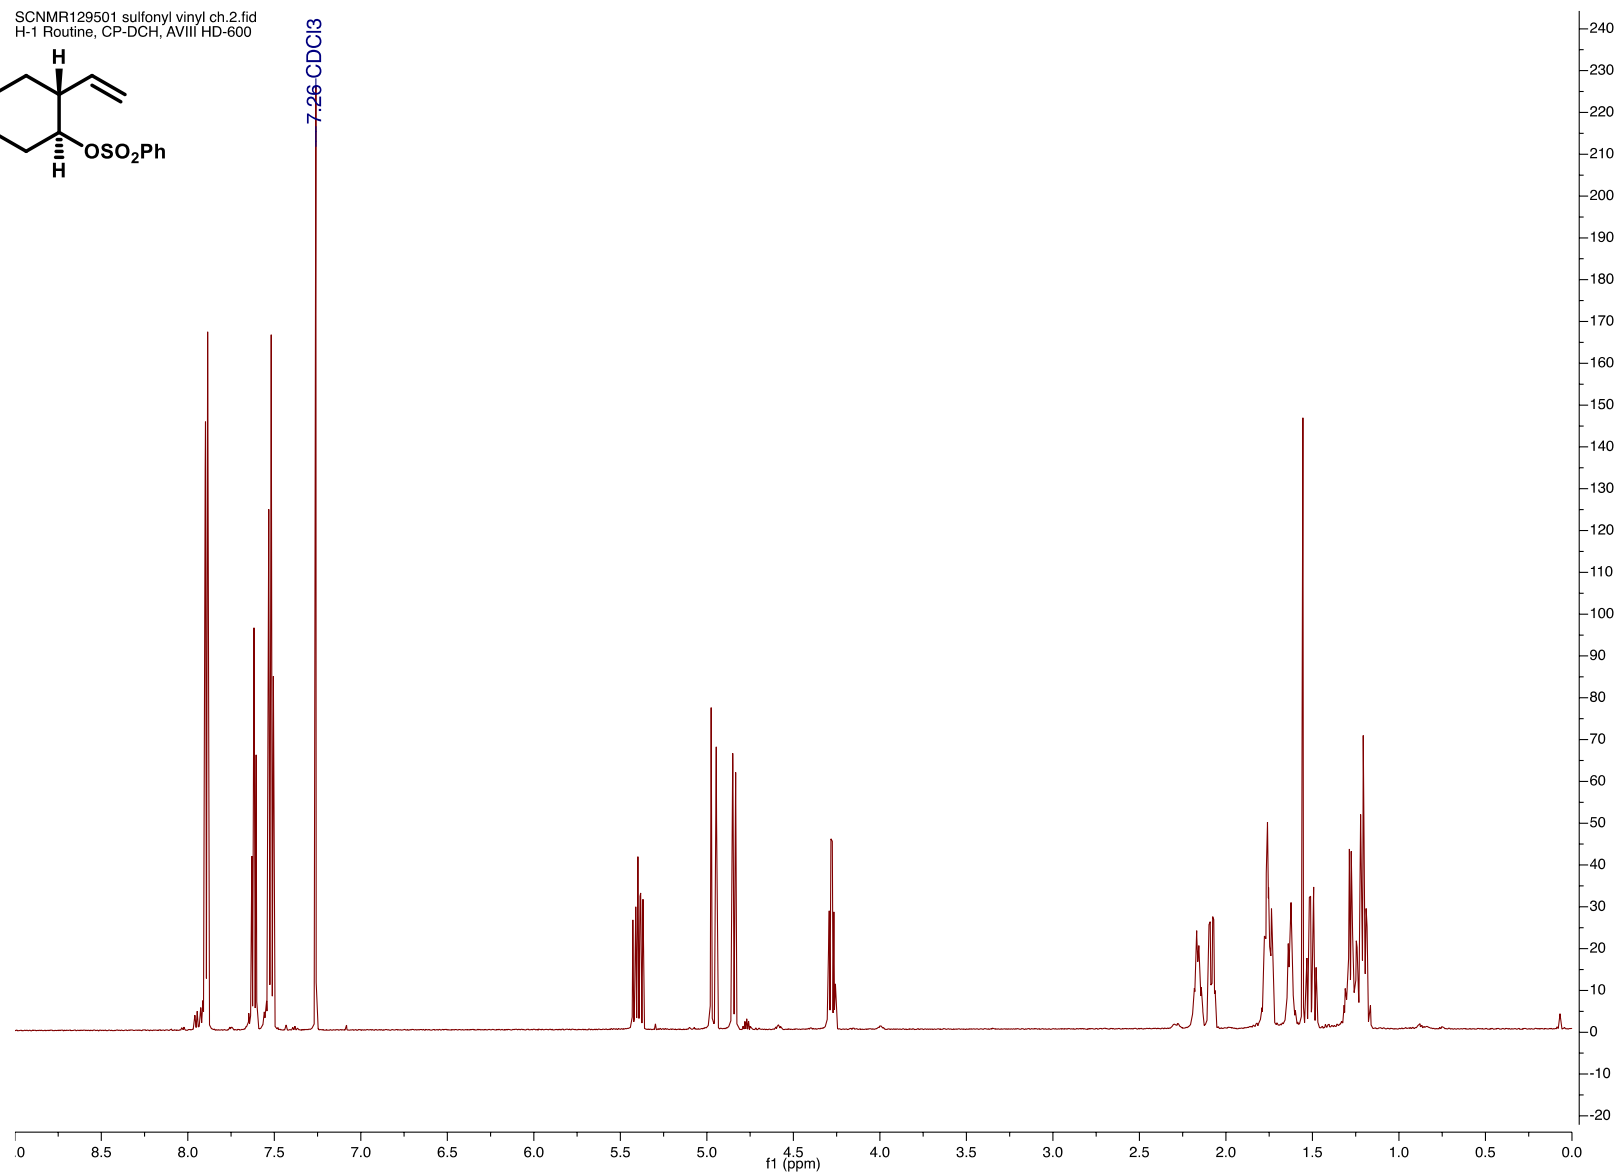



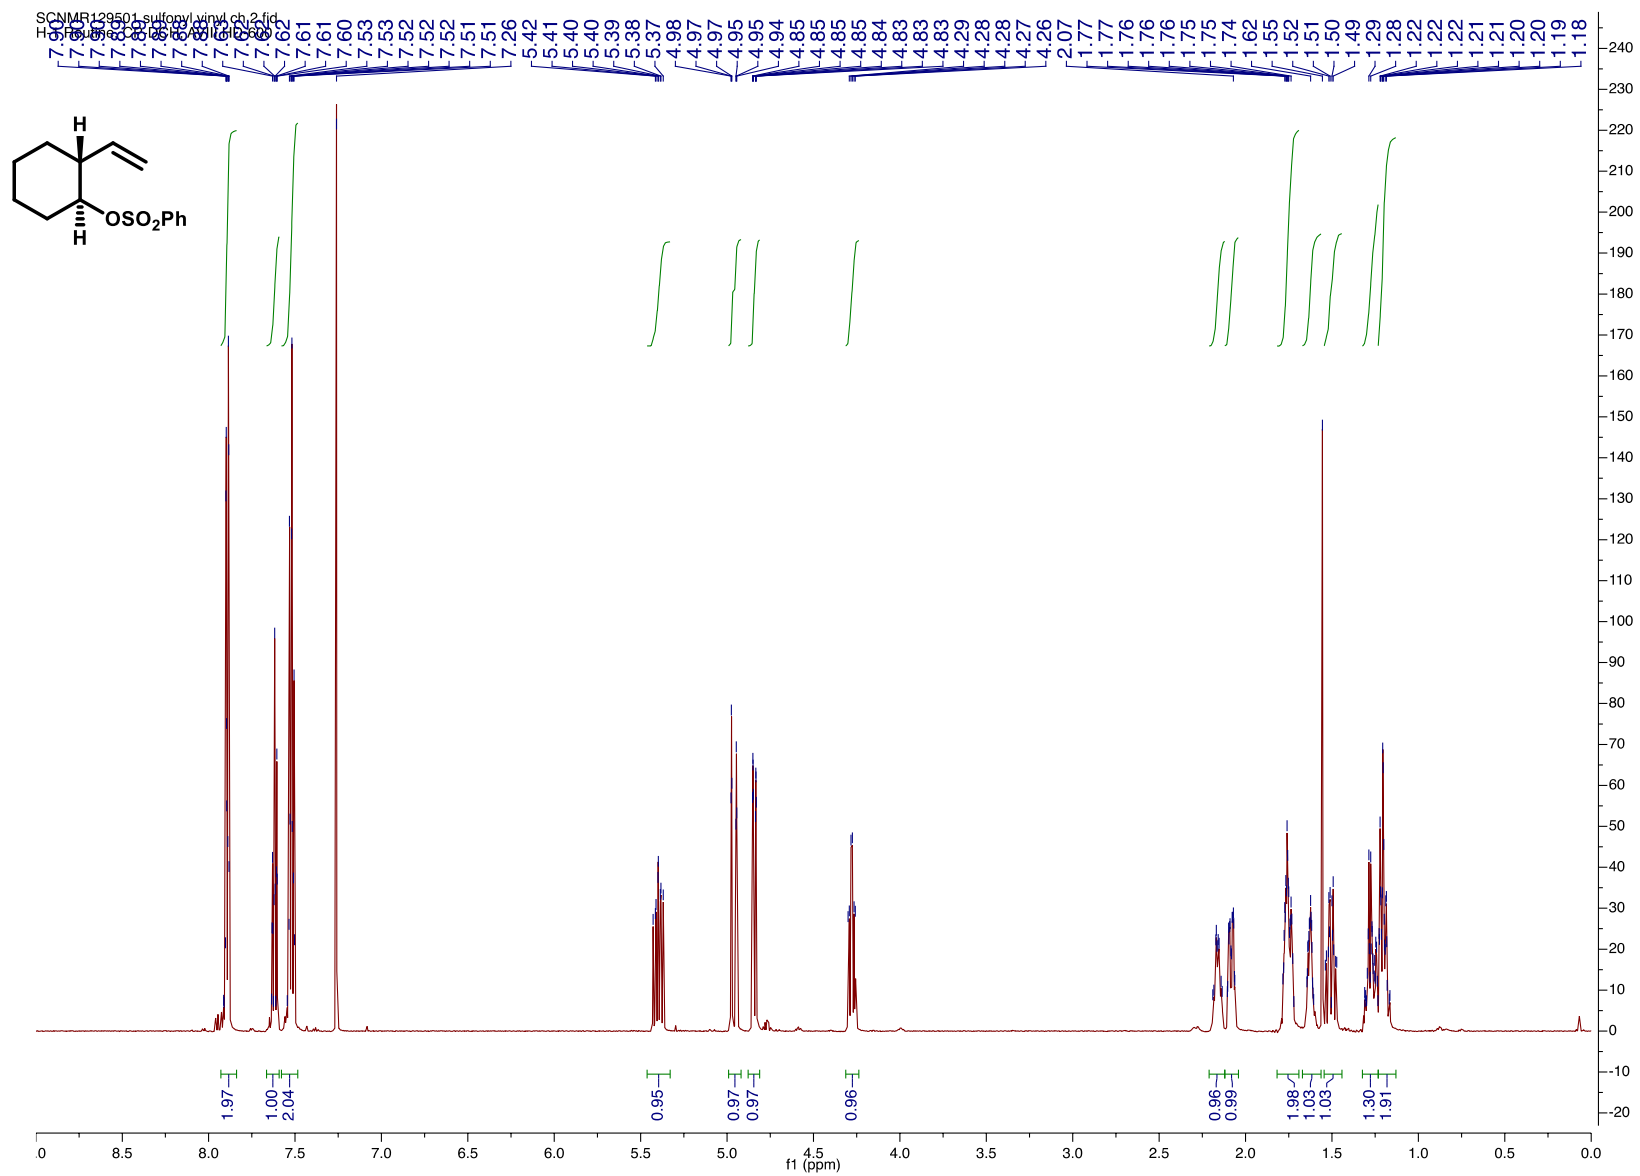

21a:  $^{13}\text{C}$ -NMR

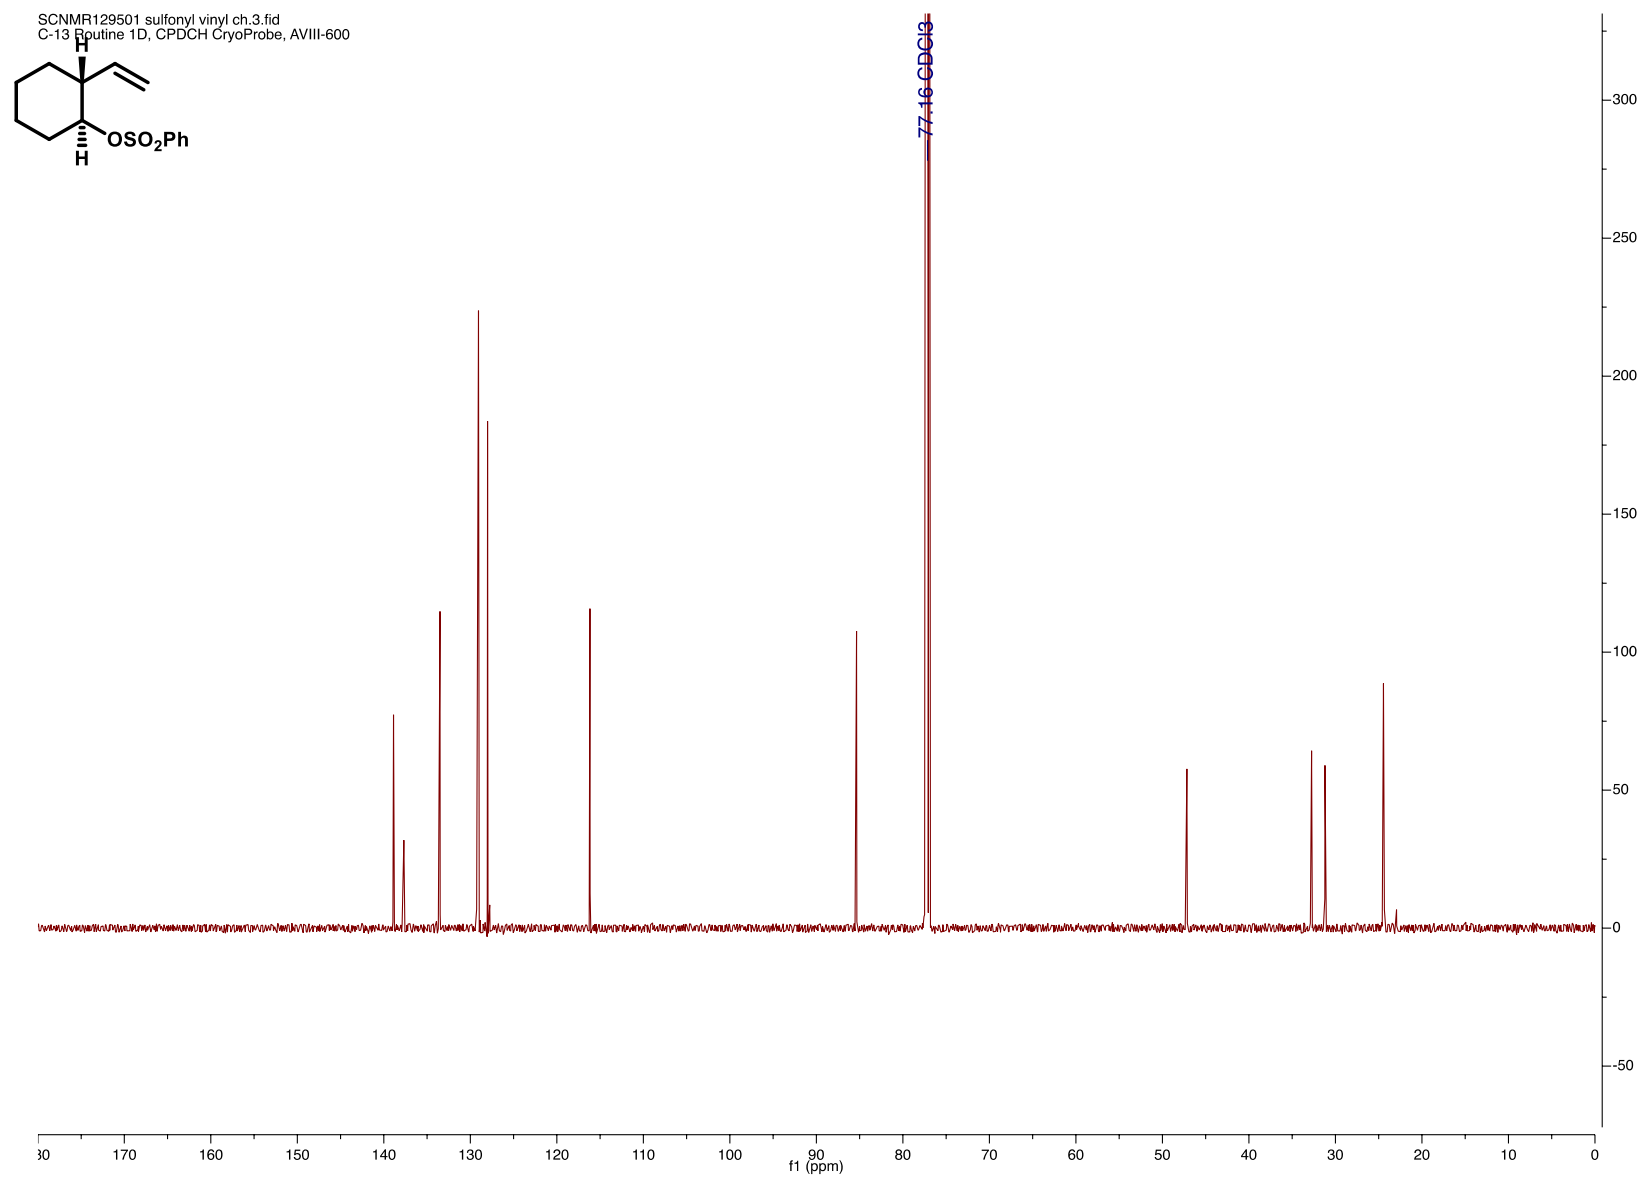

SCNMR129501 sulfonyl vinyl ch.3.fid  
C-13 Routine 1D, CPDCH CryoProbe, AVIII-600

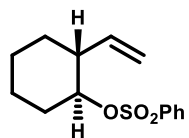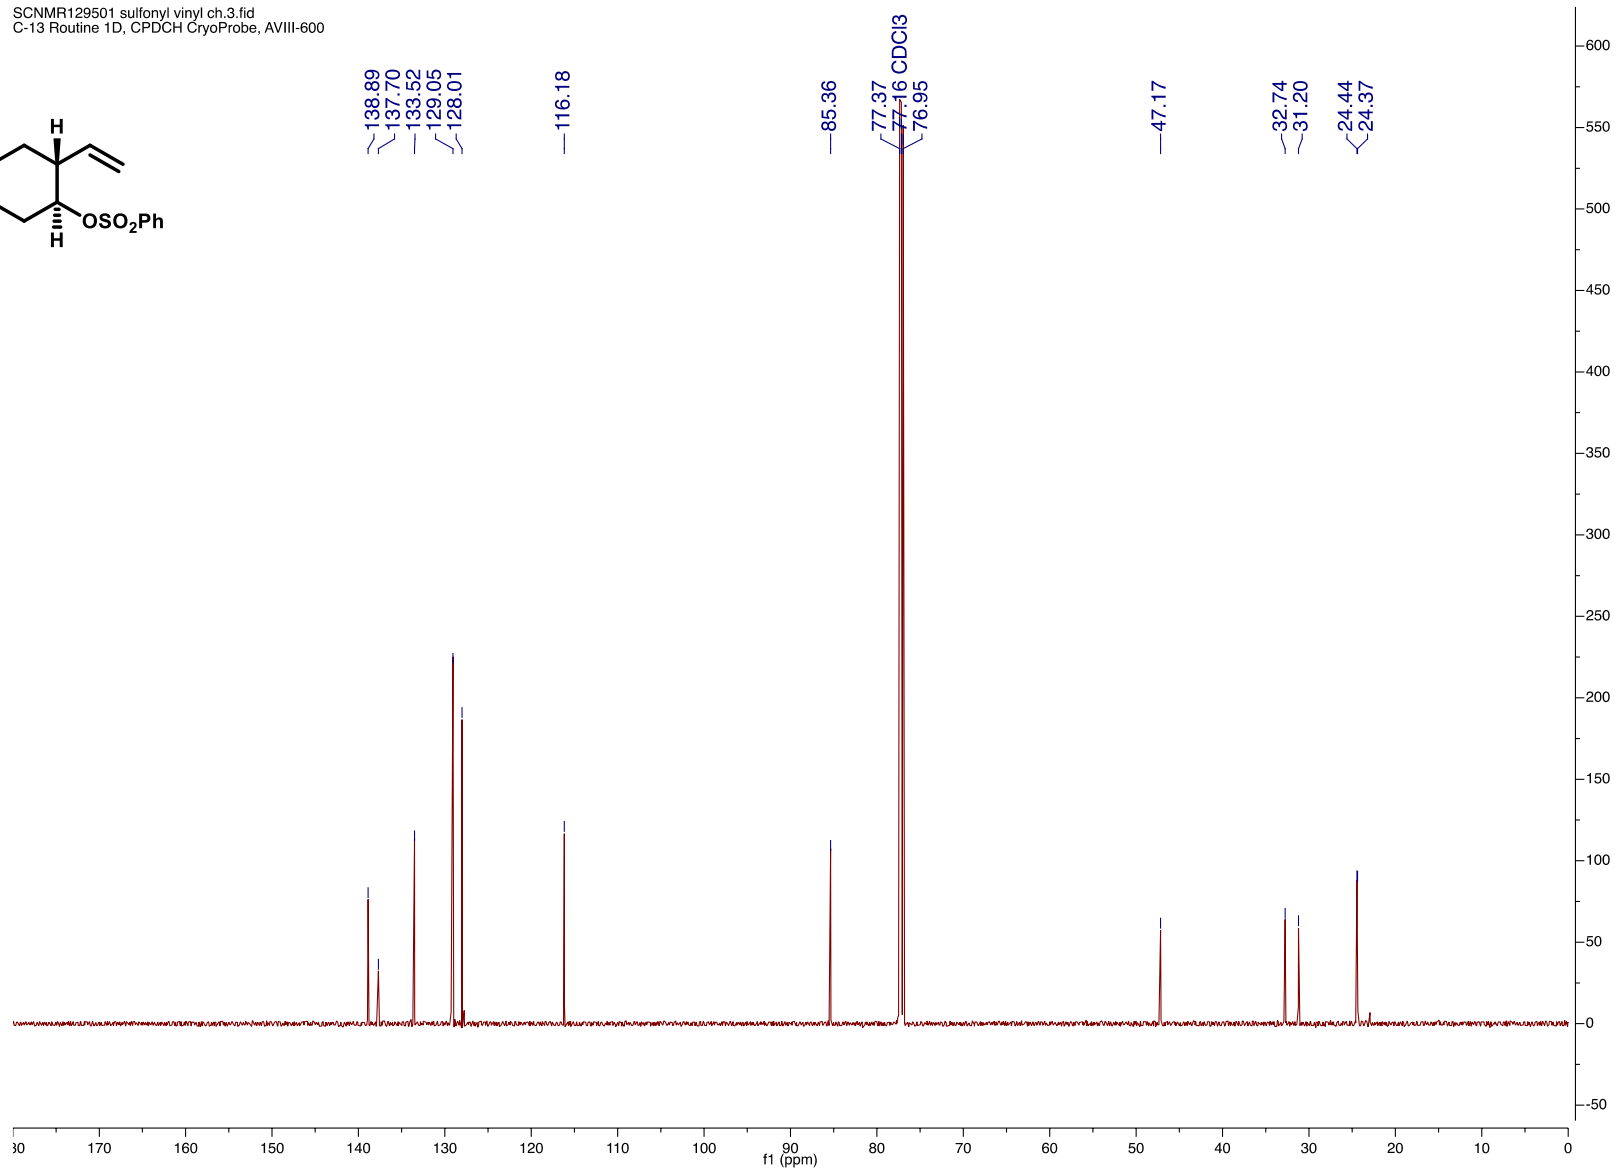

21b: <sup>1</sup>H-NMR

SCNMR131102 vinyl ch pdt.1.fid  
H-1 Routine, CP-DCH, AVIII HD-600

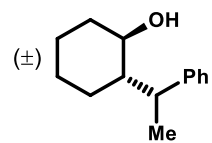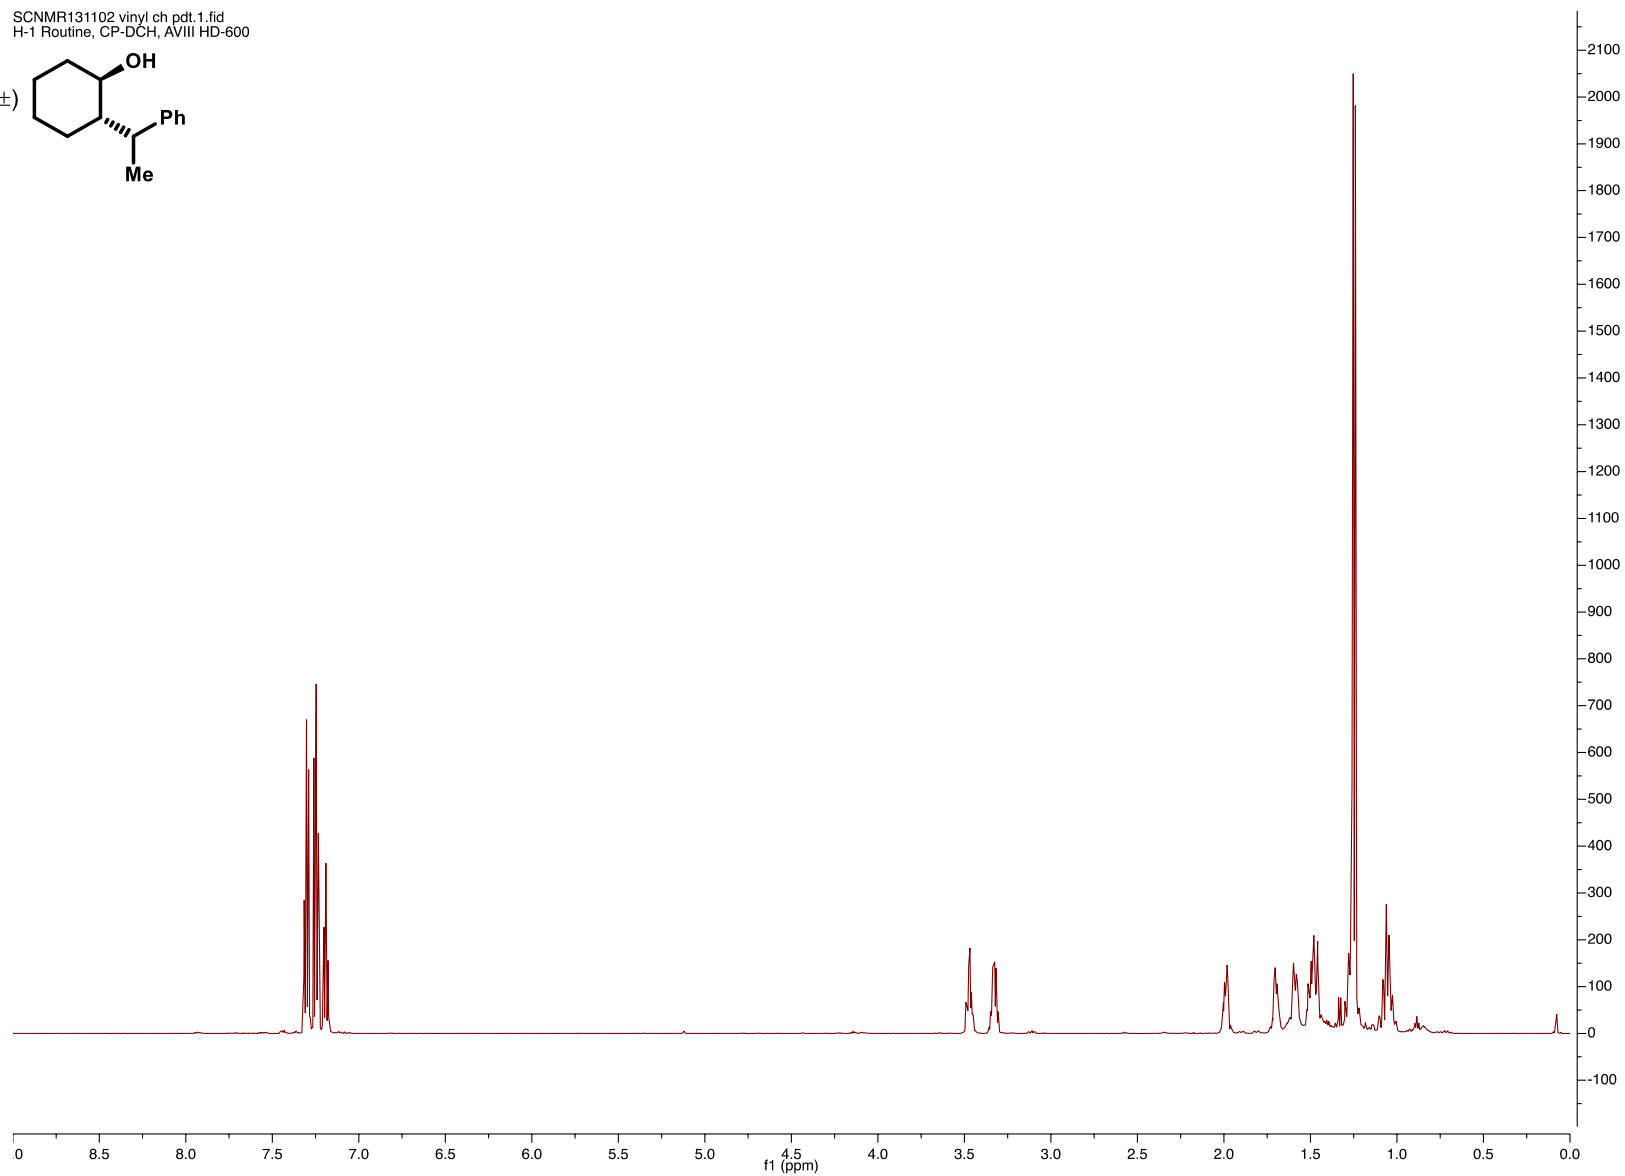

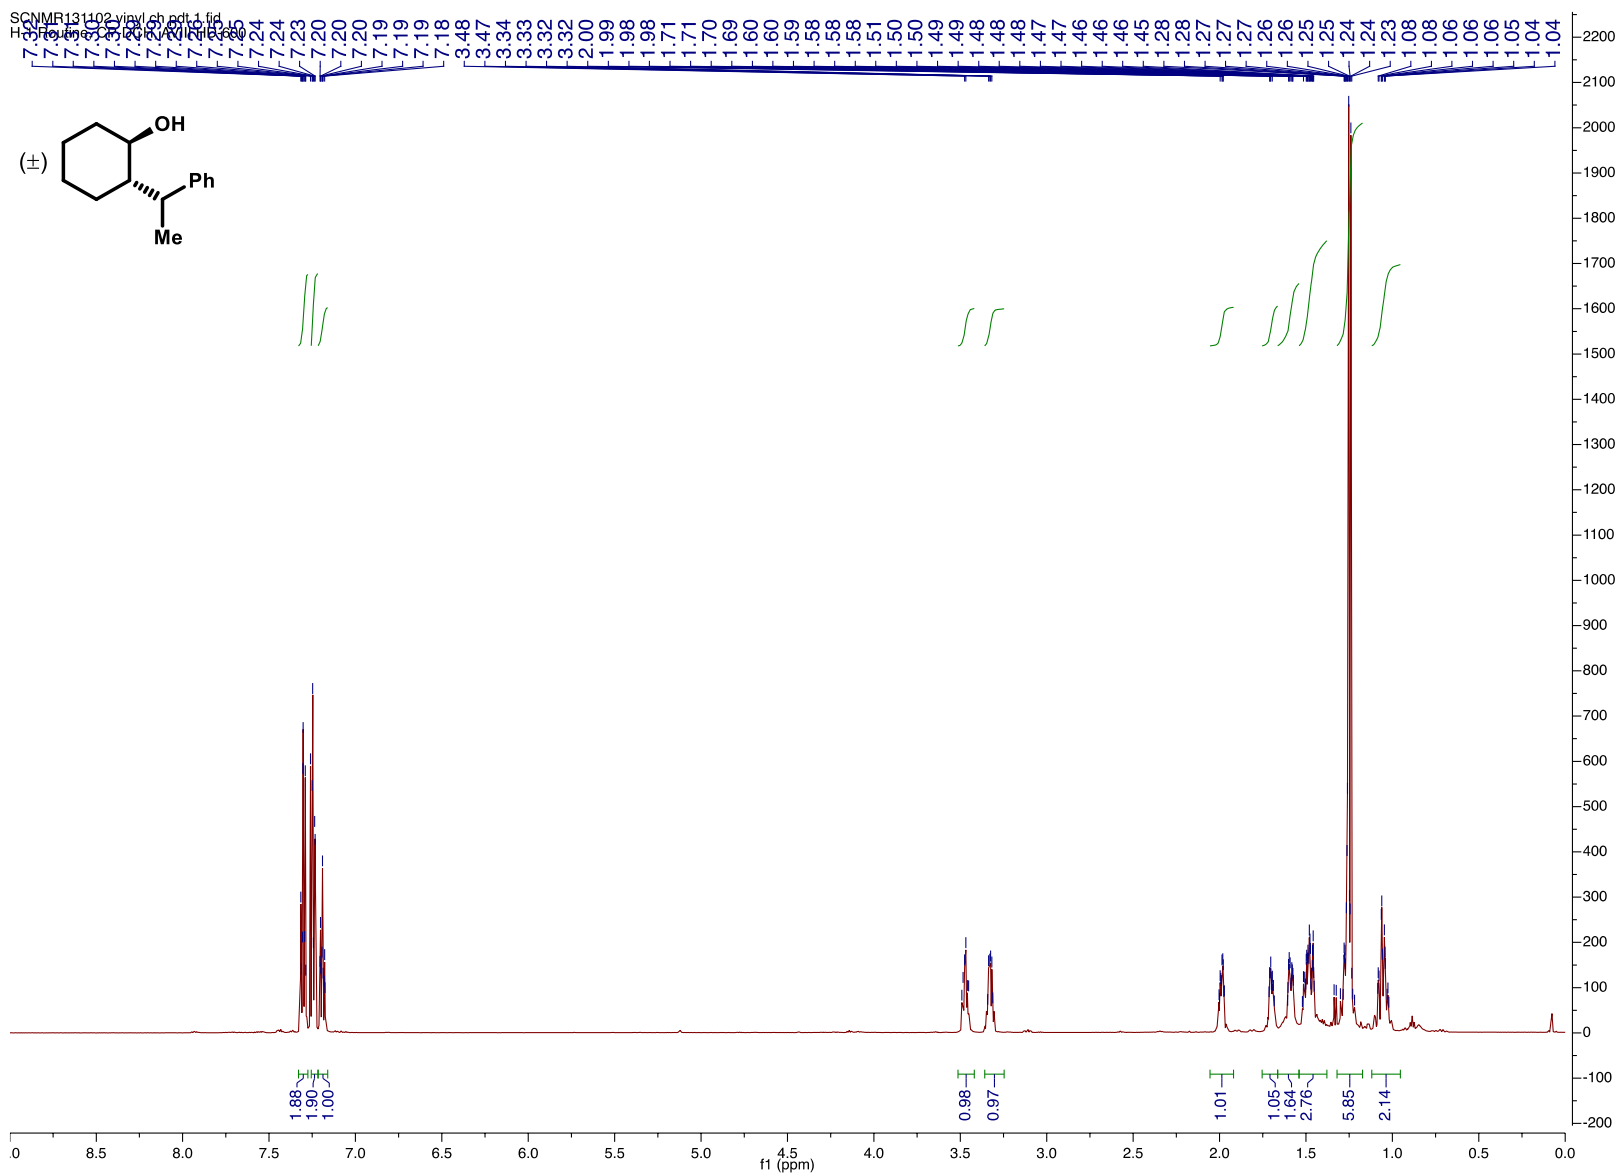

21b:  $^{13}\text{C}$ -NMR

SCNMR131102 vinyl ch pdt.2.fid  
C-13 Routine 1D, CPDCH CryoProbe, AVIII-600

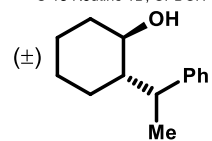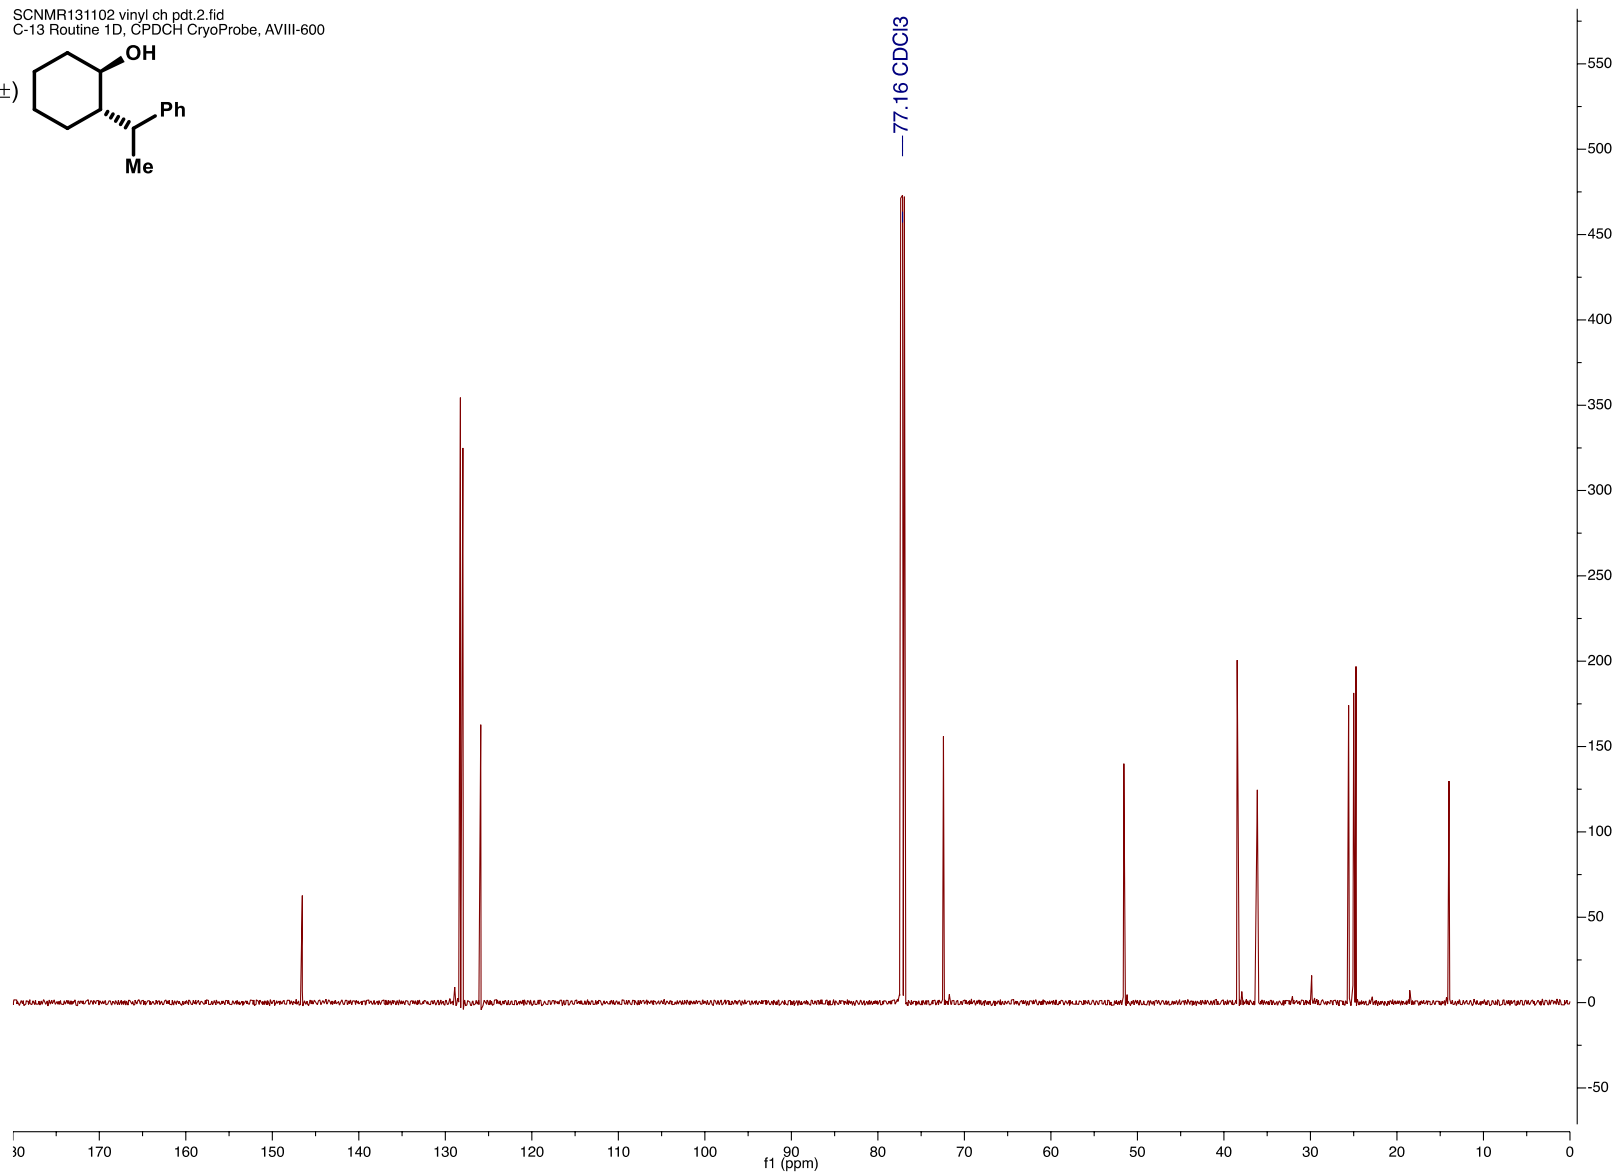

SCNMR131102 vinyl ch pdt.2.fid  
C-13 Routine 1D, CPDCH CryoProbe, AVIII-600

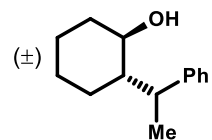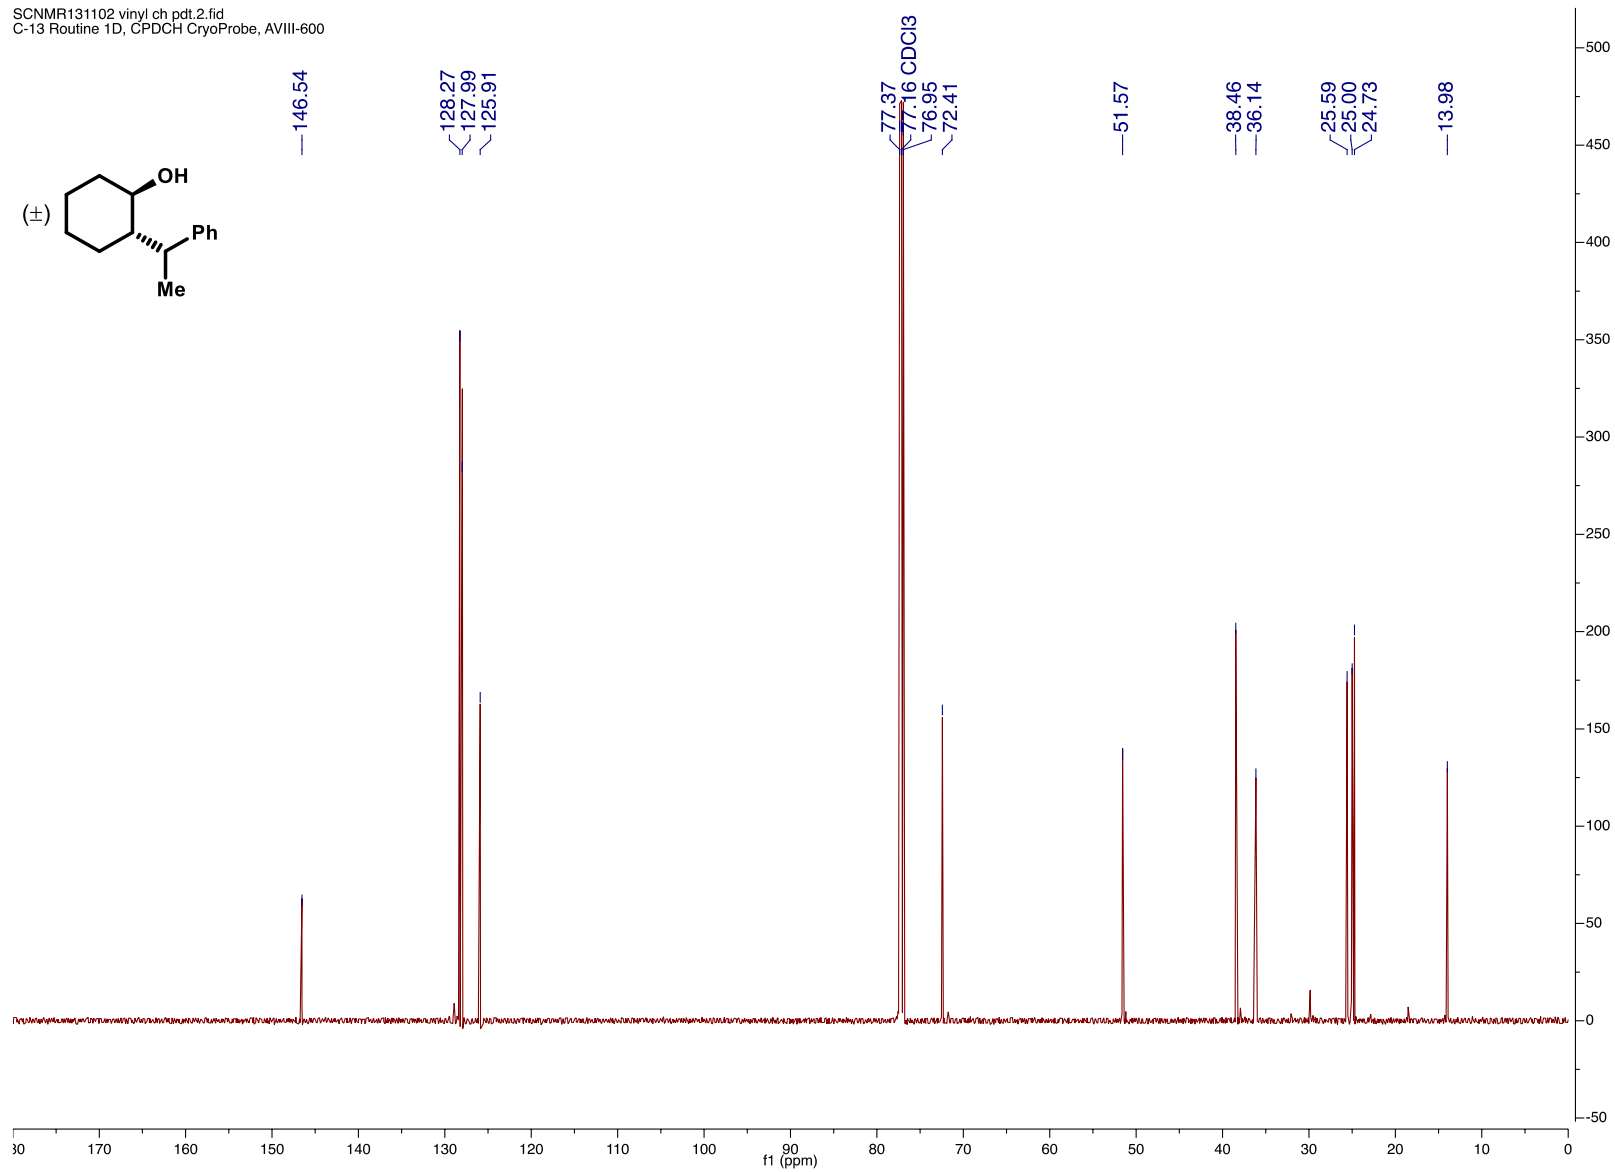

SI-23: <sup>1</sup>H-NMR

SCNMR155301 recrys of ch vinyl.1.fid  
H-1 Routine, CP-DCH, AVIII HD-600

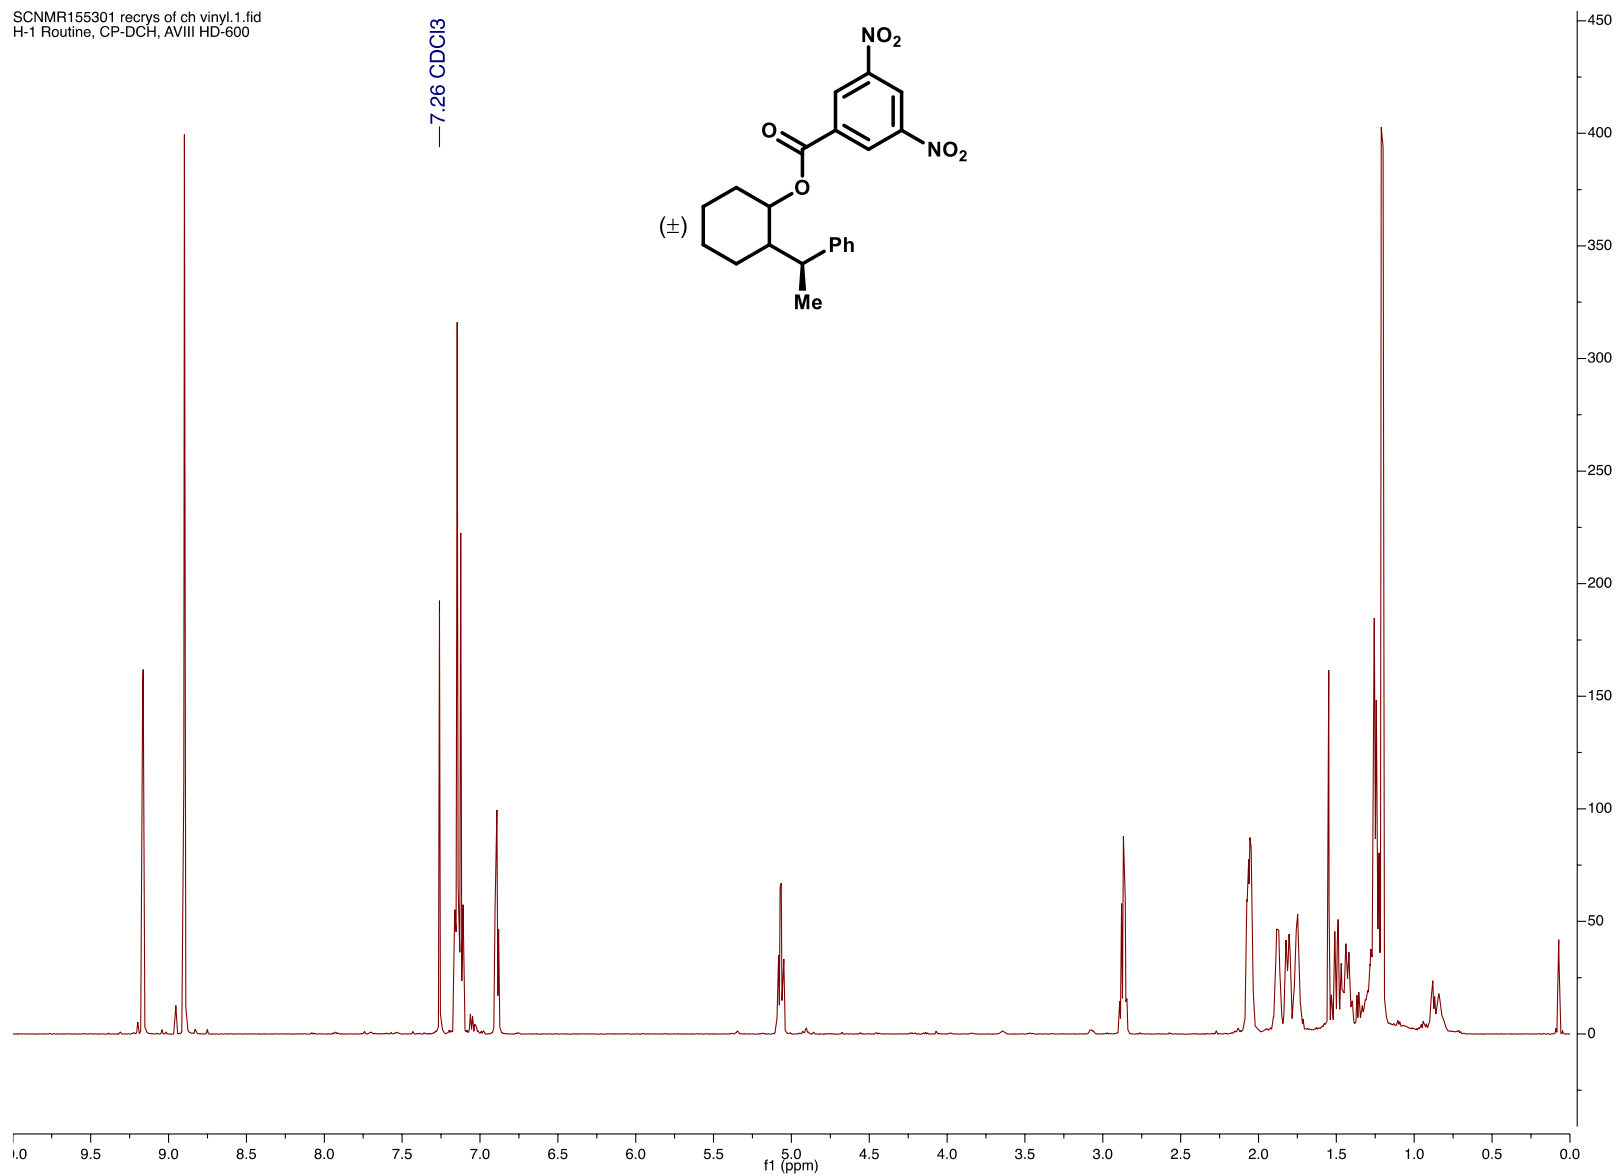



SCNMR155301 recrys of ch vinyl.1.fid  
H-1 Routine, CP-DCH, AVIII HD-600

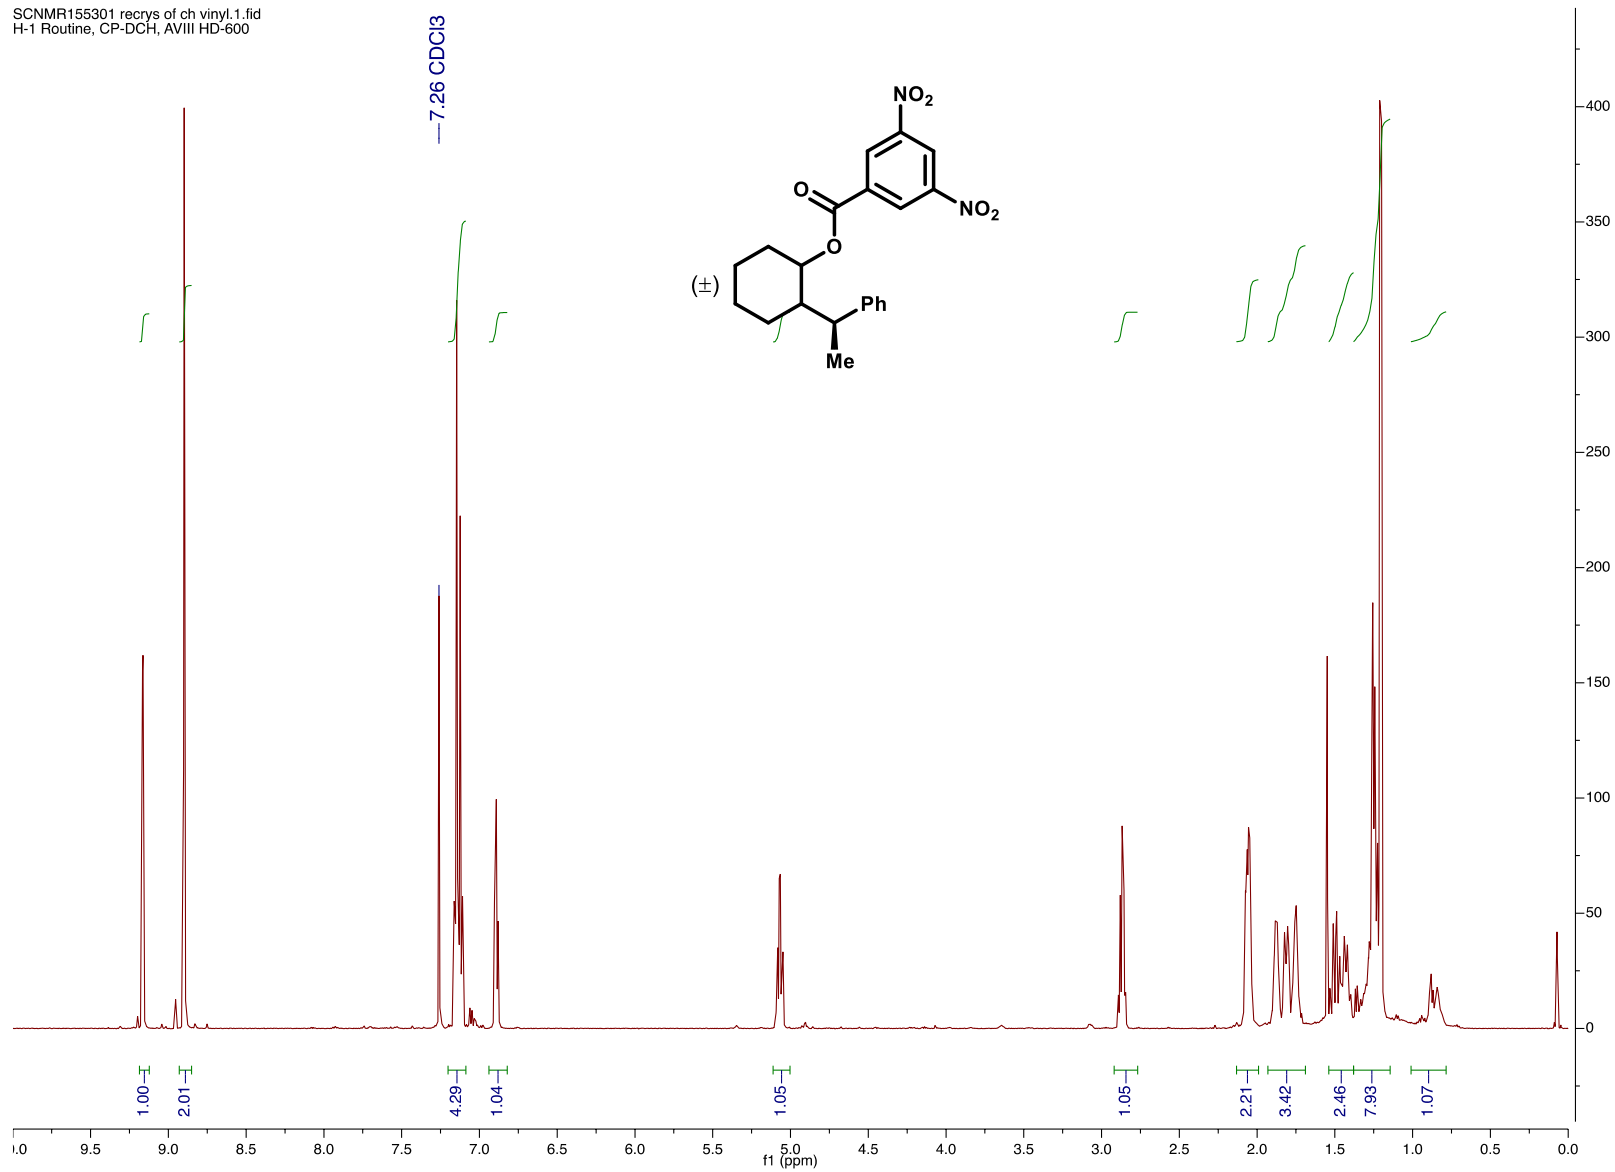

SI-23:  $^{13}\text{C}$ -NMR

SCNMR155301 recrys of ch vinyl.2.fid  
C-13 Routine 1D, CPDCH CryoProbe, AVIII-600

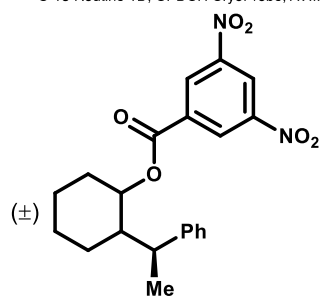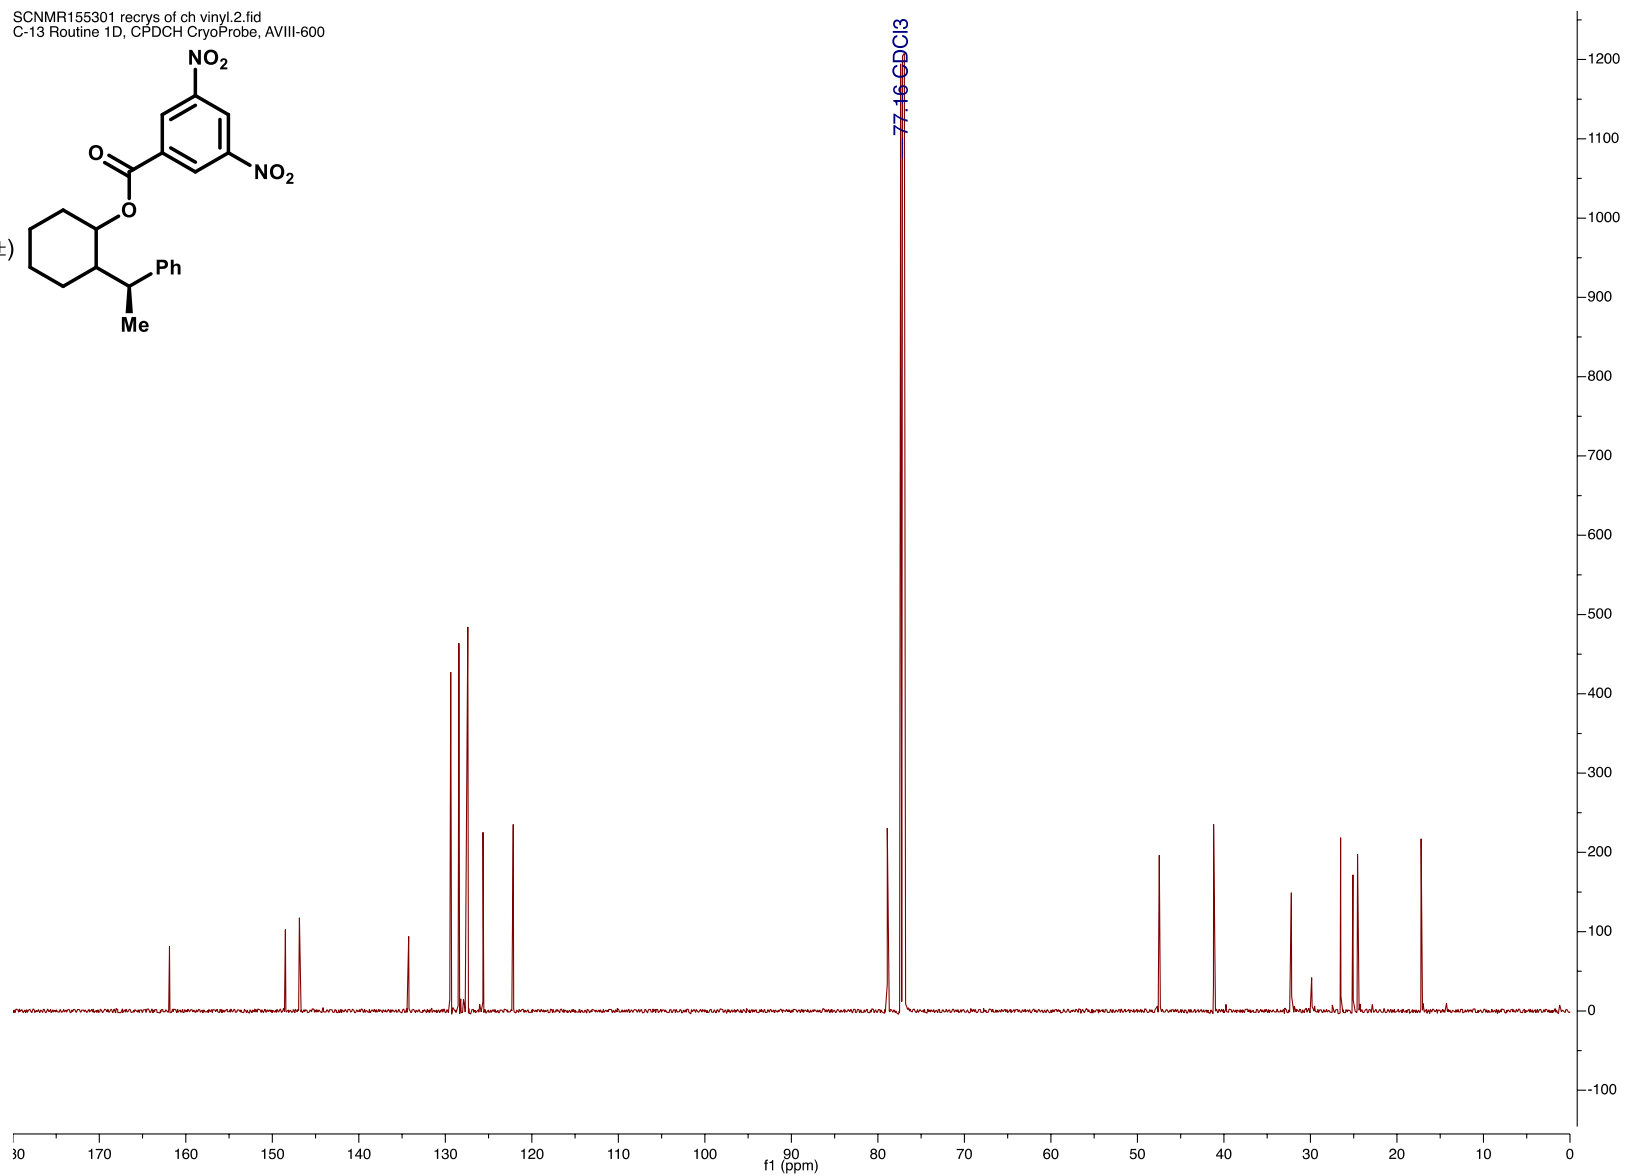

SCNMR155301 recrys of ch vinyl.2.fid  
C-13 Routine 1D, CPDCH CryoProbe, AVIII-600

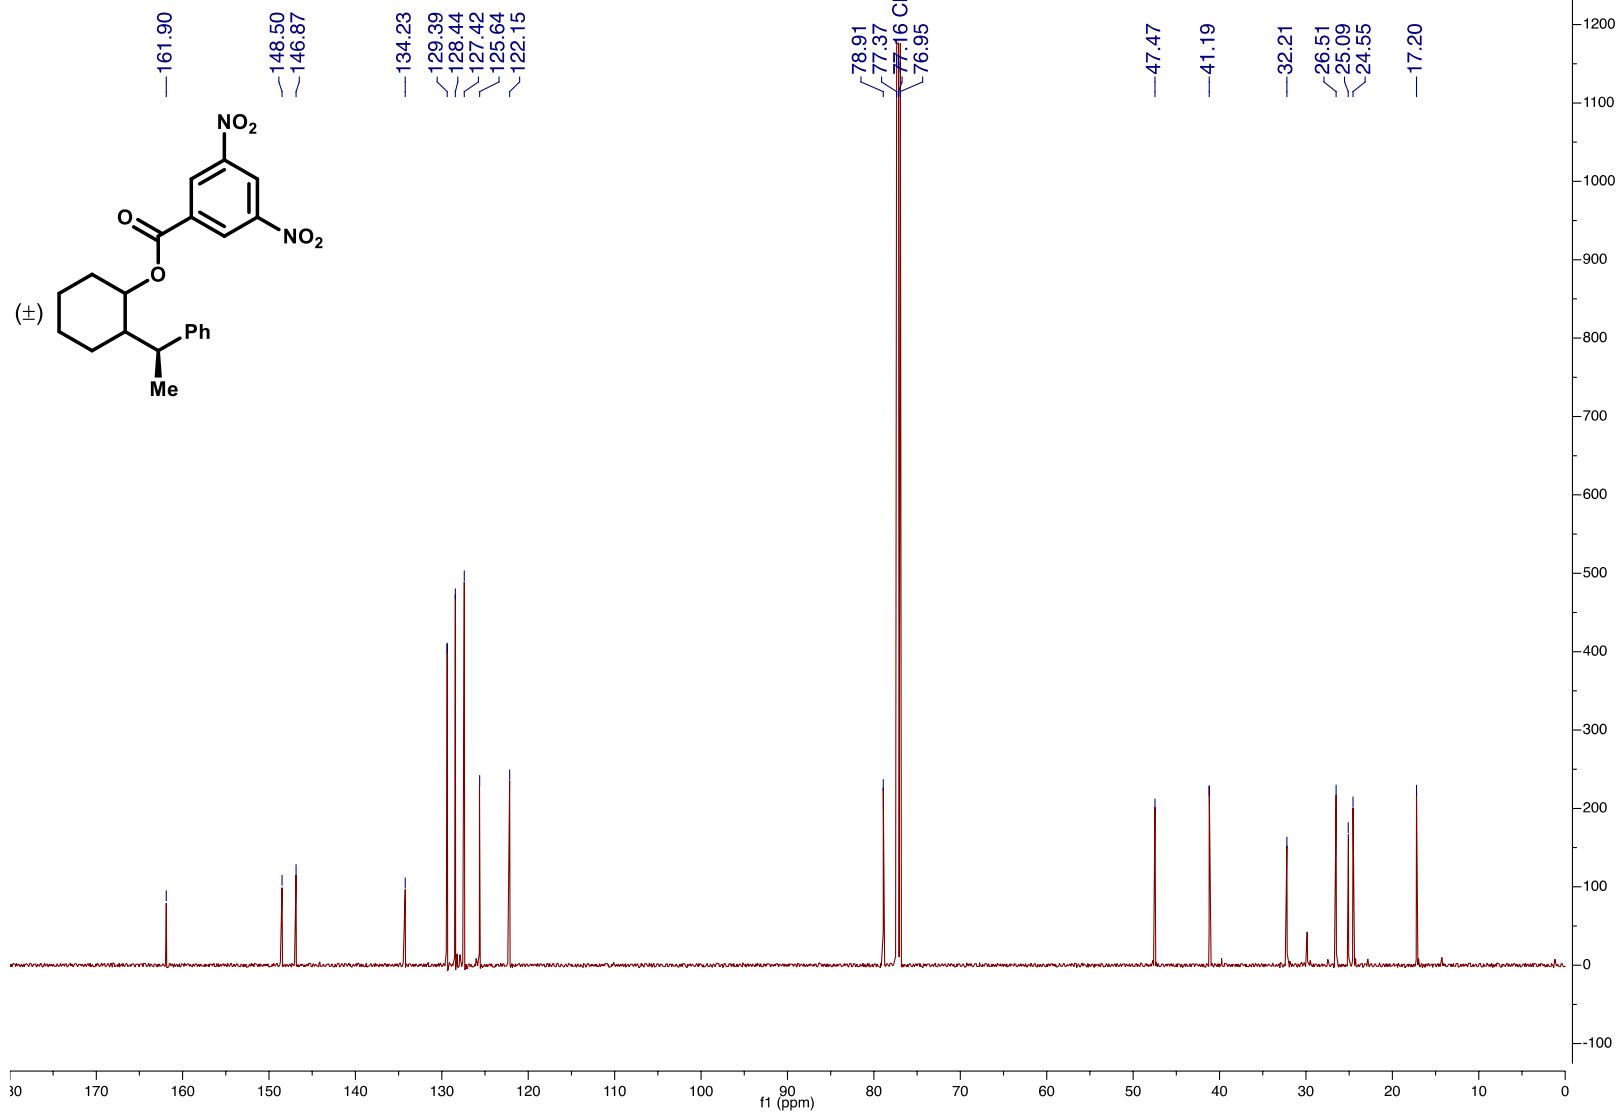

Supplement: Supplementary file 1 [file 5227993]
